# Supplementary material for: Data integration of bulk and single-cell transcriptomics from cerebral organoids and post-mortem brains to identify cell types and cell type specific driver genes in autism
Source: Research Square preprint supplement (doi:10.21203/rs.3.rs-113869/v1), 2020-12-02
Supplement: Supplementary file 1 [file 0f0a2fce4915e03dc130715b.xlsx]

## Sheet: KCTD13_CRISPR
				Mouse Ig2A- (Positive control)			NeuN-			NeuN+			NeuN OR	Nestin-			Nestin+			Nestin OR	TRA_1_60-			TRA_1_60+			TRA_1_60 OR	PGP1 (Background)
Sequence_ID	Sequence_Position (hg38 coordinates)	Sequence	Uniquely maps to 16p11.2 locus?	Reads(Mutation)	Reads(Reference)	MouseIg2A-Ratio	Reads(Mutation)	Reads(Reference)	NeuN-Ratio	Reads(Mutation)	Reads(Reference)	NeuN+Ratio		Reads(Mutation)	Reads(Reference)	Nestin-Ratio	Reads(Mutation)	Reads(Reference)	Nestin+Ratio		Reads(Mutation)	Reads(Reference)	TRA_1_60-Ratio	Reads(Mutation)	Reads(Reference)	TRA_1_60+Ratio		Reads(Mutation)	Reads(Reference)	PGP1Ratio
Mut1	chr16_29923240_29923342_del_103bp	CACCAGGTAGTAGCGTCAATCAGCACCCAACCTAGTGGGGTGGGGAGAGGCAGGGGGAAAGATGGCTTTGCTGC	No	2282	87358	0.0261224	545	101063	0.00539268	1850	125127	0.014785	2.74168	2438	99436	0.0245183	4098	135018	0.0303515	1.23791	746	124013	0.0060155	2301	124335	0.0185065	3.07646	0	186019	0
Mut2	chr16_29923319_29923328_del_10bp	CACCAGGTAGTAGCGTGCTTCGCCCAGCAGCTCCCCCAGTTCTCTCGTACTCTCCGGCAGTGGCACAGACCCATCCCGCAGGTAATTGAGGATTGACGGCCGCTCCGGTCAATCAGCACCCAACCTAGTGGGGTGGGGAGAGGC	Yes	1452	87358	0.0166213	5108	101063	0.0505427	8413	125127	0.0672357	1.33027	1125	99436	0.0113138	8420	135018	0.0623621	5.51203	8378	124013	0.0675574	2103	124335	0.016914	0.250364	6	186019	3.22548e-05
Mut3	chr16_29923261_29923354_del_94bp	CACCAGGTAGTAGCGTGCTTCGCCCAGCAGCTCCCCCAACCTAGTGGGGTGGGGAGAGGCAGGGGGAAAGATGGCTTTGCTGC	No	1109	87358	0.0126949	981	101063	0.00970682	910	125127	0.00727261	0.749227	1120	99436	0.0112635	467	135018	0.0034588	0.30708	1329	124013	0.0107166	1985	124335	0.0159649	1.48974	1	186019	5.37579e-06
Mut4	chr16_29923329_29923331_ins_3bp	CACCAGGTAGTAGCGTGCTTCGCCCAGCAGCTCCCCCAGTTCTCTCGTACTCTCCGGCAGTGGCACAGACCCATCCCGCAGGTAATTGAGGATTGTACCAAAGGATTGACGGCCGCTCCGGTCAATCAGCACCCAACCTAGTGGG	Yes	466	87358	0.00533437	704	101063	0.00696595	1393	125127	0.0111327	1.59816	674	99436	0.00677823	1573	135018	0.0116503	1.71878	1569	124013	0.0126519	323	124335	0.00259782	0.20533	2	186019	1.07516e-05
Mut5	chr16_29923324_29923332_del_9bp	CACCAGGTAGTAGCGTGCTTCGCCCAGCAGCTCCCCCAGTTCTCTCGTACTCTCCGGCAGTGGCACAGACCCATCCCGCAGGTAATTGAGGATTGTACGGCCGCTCCGGTCAATCAGCACCCAACCTAGTGGGGTGGGGAGAGGC	Yes	300	87358	0.00343414	597	101063	0.00590721	1070	125127	0.00855131	1.44761	135	99436	0.00135766	1093	135018	0.00809522	5.96264	859	124013	0.00692669	233	124335	0.00187397	0.270543	0	186019	0
Mut6	chr16_29923329_29923336_ins_8bp	CACCAGGTAGTAGCGTGCTTCGCCCAGCAGCTCCCCCAGTTCTCTCGTACTCTCCGGCAGTGGCACAGACCCATCCCGCAGGTAATTGAGGATTGTACCAAAGCGGCTGATTGACGGCCGCTCCGGTCAATCAGCACCCAACCT	Yes	217	87358	0.00248403	512	101063	0.00506615	728	125127	0.00581809	1.14842	65	99436	0.000653687	540	135018	0.00399947	6.11832	696	124013	0.00561231	228	124335	0.00183376	0.326738	1	186019	5.37579e-06
Mut7	chr16_29923317_29923330_del_14bp	CACCAGGTAGTAGCGTGCTTCGCCCAGCAGCTCCCCCAGTTCTCTCGTACTCTCCGGCAGTGGCACAGACCCATCCCGCAGGTAATTGAGGACGGCCGCTCCGGTCAATCAGCACCCAACCTAGTGGGGTGGGGAGAGGCAGGGG	No	215	87358	0.00246114	939	101063	0.00929123	1288	125127	0.0102935	1.10788	282	99436	0.002836	1325	135018	0.00981351	3.46034	1283	124013	0.0103457	336	124335	0.00270238	0.261208	2	186019	1.07516e-05
Mut8	chr16_29923329_ins_1bp	CACCAGGTAGTAGCGTGCTTCGCCCAGCAGCTCCCCCAGTTCTCTCGTACTCTCCGGCAGTGGCACAGACCCATCCCGCAGGTAATTGAGGATTGTACCAAAGGTGACGGCCGCTCCGGTCAATCAGCACCCAACCTAGTGGGGT	Yes	186	87358	0.00212917	343	101063	0.00339392	818	125127	0.00653736	1.9262	108	99436	0.00108613	941	135018	0.00696944	6.41679	877	124013	0.00707184	264	124335	0.0021233	0.300247	1	186019	5.37579e-06
Mut9	chr16_29923312_29923338_del_27bp	CACCAGGTAGTAGCGTGCTTCGCCCAGCAGCTCCCCCAGTTCTCTCGTACTCTCCGGCAGTGGCACAGACCCATCCCGCAGGTAATTCCGGTCAATCAGCACCCAACCTAGTGGGGTGGGGAGAGGCAGGGGGAAAGATGGCTTT	No	172	87358	0.00196891	1665	101063	0.0164749	1778	125127	0.0142096	0.862499	338	99436	0.00339917	2123	135018	0.0157238	4.62578	2620	124013	0.0211268	424	124335	0.00341014	0.161413	1	186019	5.37579e-06
Mut10	chr16_29923327_29923332_ins_6bp	CACCAGGTAGTAGCGTGCTTCGCCCAGCAGCTCCCCCAGTTCTCTCGTACTCTCCGGCAGTGGCACAGACCCATCCCGCAGGTAATTGAGGATTGTACCAATTGAGGATTGACGGCCGCTCCGGTCAATCAGCACCCAACCTAGT	Yes	148	87358	0.00169418	234	101063	0.00231539	506	125127	0.00404389	1.74653	94	99436	0.000945332	433	135018	0.00320698	3.39244	447	124013	0.00360446	88	124335	0.000707765	0.196358	0	186019	0
Mut11	chr16_29923321_29923326_del_6bp	CACCAGGTAGTAGCGTGCTTCGCCCAGCAGCTCCCCCAGTTCTCTCGTACTCTCCGGCAGTGGCACAGACCCATCCCGCAGGTAATTGAGGATTGATTGACGGCCGCTCCGGTCAATCAGCACCCAACCTAGTGGGGTGGGG	Yes	139	87358	0.00159115	344	101063	0.00340382	212	125127	0.00169428	0.497758	64	99436	0.00064363	218	135018	0.0016146	2.50858	151	124013	0.00121761	63	124335	0.000506696	0.416138	0	186019	0
Mut12	chr16_29923327_29923328_del_2bp	CACCAGGTAGTAGCGTGCTTCGCCCAGCAGCTCCCCCAGTTCTCTCGTACTCTCCGGCAGTGGCACAGACCCATCCCGCAGGTAATTGAGGATTGTACCAATGACGGCCGCTCCGGTCAATCAGCACCCAACCTAGTGGGGTGGG	Yes	123	87358	0.001408	671	101063	0.00663942	1042	125127	0.00832754	1.25426	143	99436	0.00143811	1489	135018	0.0110282	7.6685	1339	124013	0.0107973	131	124335	0.00105361	0.0975808	1	186019	5.37579e-06
Mut13	chr16_29923320_29923327_del_8bp	CACCAGGTAGTAGCGTGCTTCGCCCAGCAGCTCCCCCAGTTCTCTCGTACTCTCCGGCAGTGGCACAGACCCATCCCGCAGGTAATTGAGGATTGTGACGGCCGCTCCGGTCAATCAGCACCCAACCTAGTGGGGTGGGGAGAGG	Yes	108	87358	0.00123629	100	101063	0.000989482	289	125127	0.00230965	2.33421	59	99436	0.000593346	274	135018	0.00202936	3.42019	360	124013	0.00290292	66	124335	0.000530824	0.182859	0	186019	0
Mut14	chr16_29923328_29923333_del_6bp	CACCAGGTAGTAGCGTGCTTCGCCCAGCAGCTCCCCCAGTTCTCTCGTACTCTCCGGCAGTGGCACAGACCCATCCCGCAGGTAATTGAGGATTGTACCAAAGCCGCTCCGGTCAATCAGCACCCAACCTAGTGGGGTGGGG	Yes	108	87358	0.00123629	306	101063	0.00302781	344	125127	0.00274921	0.907984	66	99436	0.000663744	189	135018	0.00139981	2.10897	333	124013	0.0026852	176	124335	0.00141553	0.52716	2	186019	1.07516e-05
Mut15	chr16_29923328_29923334_ins_7bp	CACCAGGTAGTAGCGTGCTTCGCCCAGCAGCTCCCCCAGTTCTCTCGTACTCTCCGGCAGTGGCACAGACCCATCCCGCAGGTAATTGAGGATTGTACCAAATTGAGGATTGACGGCCGCTCCGGTCAATCAGCACCCAACCT	No	84	87358	0.00096156	251	101063	0.0024836	246	125127	0.001966	0.791594	130	99436	0.00130737	565	135018	0.00418463	3.20079	725	124013	0.00584616	160	124335	0.00128685	0.220118	1	186019	5.37579e-06
Mut16	chr16_29923328_del_1bp	CACCAGGTAGTAGCGTGCTTCGCCCAGCAGCTCCCCCAGTTCTCTCGTACTCTCCGGCAGTGGCACAGACCCATCCCGCAGGTAATTGAGGATTGTACCAAATGACGGCCGCTCCGGTCAATCAGCACCCAACCTAGTGGGGTGG	Yes	49	87358	0.00056091	164	101063	0.00162275	342	125127	0.00273322	1.68432	54	99436	0.000543063	226	135018	0.00167385	3.08224	309	124013	0.00249167	41	124335	0.000329754	0.132342	1	186019	5.37579e-06
Mut17	chr16_29923324_29923335_del_12bp	CACCAGGTAGTAGCGTGCTTCGCCCAGCAGCTCCCCCAGTTCTCTCGTACTCTCCGGCAGTGGCACAGACCCATCCCGCAGGTAATTGAGGATTGTACCGCTCCGGTCAATCAGCACCCAACCTAGTGGGGTGGGGAGAGGCAGG	No	32	87358	0.000366309	858	101063	0.00848975	1003	125127	0.00801586	0.94418	239	99436	0.00240356	802	135018	0.00593995	2.47132	1075	124013	0.00866845	204	124335	0.00164073	0.189276	2	186019	1.07516e-05
Mut18	chr16_29923327_29923332_ins_6bp	CACCAGGTAGTAGCGTGCTTCGCCCAGCAGCTCCCCCAGTTCTCTCGTACTCTCCGGCAGTGGCACAGACCCATCCCGCAGGTAATTGAGGATTGTACCAATCCTCAATTGACGGCCGCTCCGGTCAATCAGCACCCAACCTAGT	Yes	32	87358	0.000366309	161	101063	0.00159307	287	125127	0.00229367	1.43978	50	99436	0.000502836	214	135018	0.00158497	3.15207	274	124013	0.00220945	66	124335	0.000530824	0.240252	1	186019	5.37579e-06
Mut19	chr16_29923329_large_del	CACCAGGTAGTAGCGTGCTTCGCCCAGCAGCTCCCCCAGTTCTCTCGTACTCTCCGGCAGTGGCACAGACCCATCCCGCAGGTAATTGAGGATTGTACCAAAGGATTTTGTACCAAAGGATTTTTGTACCAAAGGATTGTACCA	Yes	25	87358	0.000286179	123	101063	0.00121706	165	125127	0.00131866	1.08348	25	99436	0.000251418	87	135018	0.000644359	2.5629	90	124013	0.00072573	99	124335	0.000796236	1.09715	0	186019	0
