# Supplementary material for: Data integration of bulk and single-cell transcriptomics from cerebral organoids and post-mortem brains to identify cell types and cell type specific driver genes in autism
Source: Research Square preprint supplement (doi:10.21203/rs.3.rs-113869/v1), 2020-12-02
Supplement: Supplementary file 2 [file 12da9e3255aef5b9cbe74027.xlsx]

## Sheet: 15q11-13
									FPKM in individuals with ASD and 15q11-13 duplications												FPKM in controls without 15q11-13 dupllications
Cytogenetic band	AccessionID	EntrezGeneID	Gene	GeneName	FoldChange	log2(FoldChange)	P	FDR	1601_1	1601_2	1601_3	1401_1	1401_2	1401_3	1001_1	1001_2	1001_3	901_1	901_2	901_3	902_1	902_2	902_3	PGP1_1	PGP1_2	PGP1_3	GM23716_1	GM23716_2	GM23716_3	GM23720_1	GM23720_2	GM23720_3	GM25256_1	GM25256_2	GM25256_3	BYS0110_1	BYS0110_2	BYS0110_3	BYS0111_1	BYS0111_2	BYS0111_3	BYS0112_1	BYS0112_2	BYS0112_3	BXS0114_1	BXS0114_2	BXS0114_3	BXS0115_1	BXS0115_2
15q13.1	NM_004667	8924	HERC2	HECT and RLD domain containing E3 ubiquitin protein ligase 2	1.47765	0.563301	8.71e-09	8.69e-05	8.54916	9.52507	4.5214	6.88138	5.55893	6.64415	11.0559	10.9979	9.8334	9.97921	10.0438	8.13232	2.9795	4.27419	3.49879	4.73895	6.21838	4.48823	5.5614	6.10758	6.35201	5.70738	5.4772	4.4482	6.81505	3.83991	4.20942	4.09037	4.5981	4.59175	4.06304	4.19124	5.96218	4.24106	5.21439	4.94913	5.32865	4.49273	3.71263	4.89891	6.21277
5q33.1	NM_005617	6208	RPS14	ribosomal protein S14	1.10602	0.145373	1.62e-07	0.000809641	1102.46	1198.27	1738.93	1565.04	1746.52	1568.46	1439.97	1665.46	1588.93	1546.33	1536.72	1633.92	1575.43	1569.77	1403.64	1059	1340.5	1327.16	799.472	718.788	711.586	1109.44	932.679	982.484	867.424	1228.83	909.223	1474.14	1653.11	1708.11	1071.76	1246.74	556.07	1435.35	1323.54	1350.59	1496.91	1434.44	1102.69	937.022	793.397
5q31	NM_018926	56100	PCDHGB6	protocadherin gamma subfamily B, 6	0.542503	-0.882298	2.46e-07	0.000819503	8.6004	11.2806	5.23215	7.50244	6.51903	8.54125	6.16261	4.39735	5.82702	2.74577	3.21474	3.32133	7.54192	8.3892	7.79347	8.66567	11.7861	8.9452	27.5064	27.7344	30.7322	6.57316	5.84404	6.65884	22.011	16.7153	17.6176	8.79581	10.9999	13.3453	23.0324	19.6057	22.4864	16.0356	16.948	17.3602	15.5023	14.4757	11.3376	15.69	19.6212
15q11.2	NM_052903	114791	TUBGCP5	tubulin, gamma complex associated protein 5	1.72012	0.782513	9.42e-07	0.00235027	4.87878	4.8151	7.75947	2.78336	3.55174	4.1305	7.67051	7.90918	8.08275	5.42962	8.30341	7.77397	3.75757	4.09035	2.48249	3.07734	5.50203	6.77681	3.39784	2.74031	2.90397	3.43677	2.63657	2.31258	1.95788	1.22062	3.05577	4.26211	3.37533	3.61618	1.3349	1.31074	1.42484	3.05554	4.29768	2.55494	4.67377	3.96523	3.12741	2.94633	1.56963
6q22.33	NM_032784	84870	RSPO3	R-spondin 3	1.83855	0.878566	1.62e-06	0.00322356	11.7828	6.74069	7.8832	9.1476	8.49498	6.88923	19.5163	12.0999	17.651	12.2295	16.909	11.9603	6.84092	4.27226	3.15454	6.00662	4.18785	6.8106	2.88637	3.19097	3.91334	4.40183	4.51299	5.55158	2.85542	2.39045	3.05088	4.85116	4.79542	5.95307	2.4786	2.43533	2.72232	7.79456	7.05783	6.27199	8.93639	12.8784	16.6087	1.61346	1.76909
15q11.2	NM_014608	23191	CYFIP1	cytoplasmic FMR1 interacting protein 1	1.34982	0.432771	3.72e-06	0.0061917	21.0962	20.5205	13.8211	11.3392	9.48195	13.0934	29.4939	31.684	28.6613	38.8044	35.7278	37.6971	10.0633	14.3474	11.5182	16.0356	13.6786	15.7203	8.7914	8.18258	8.77529	16.6357	15.4292	16.1023	11.9562	9.87261	9.19881	14.5723	13.021	11.1484	7.95881	7.73116	16.7451	12.1694	13.641	11.9747	15.5538	11.7504	11.2181	13.2197	11.8412
15q11.2	NM_030922	81614	NIPA2	non imprinted in Prader-Willi/Angelman syndrome 2	1.47402	0.559756	6.59e-06	0.00939364	7.03778	6.32721	8.43157	5.00402	5.07227	4.86181	8.30577	7.15163	7.09718	7.89554	8.48671	10.0454	5.10579	6.64836	4.97439	3.89674	3.35047	4.18921	5.33991	5.53476	3.40554	2.53098	3.95181	4.44811	3.3424	3.15578	5.96778	5.0189	2.96026	2.82355	1.32795	2.17159	4.58414	4.82686	3.87768	3.83149	6.6924	4.00295	5.78326	4.14617	4.98786
9p21.3	NM_004432	1993	ELAVL2	ELAV like neuron-specific RNA binding protein 2	0.515159	-0.95691	1.11e-05	0.013811	2.76797	1.64552	1.42076	8.65141	12.3228	9.85429	4.81332	3.5162	4.08249	0.771103	1.18111	0.87389	5.49186	4.93969	4.04003	8.52044	8.79805	6.71663	28.7315	24.9932	21.0561	5.7044	6.71497	5.81957	10.237	12.0012	13.962	6.77634	6.40027	8.24275	4.72072	3.88339	8.32212	5.58286	5.17457	5.25173	4.1348	7.05361	7.27829	6.54946	7.59748
15q11.2	NM_000462	7337	UBE3A	ubiquitin protein ligase E3A	1.3845	0.469365	1.31e-05	0.014533	28.1186	25.6365	26.7235	13.1502	16.3605	11.7816	13.8559	15.2564	13.7395	6.9953	12.3321	9.15204	11.1812	11.868	9.48142	10.6931	8.8351	4.95956	9.98142	7.20437	10.05	11.0214	8.26868	8.03709	6.73159	8.74679	8.9974	6.4443	6.22847	6.0295	4.32286	5.18077	5.91222	7.83952	10.046	7.30717	6.65122	9.86617	9.46547	5.82761	7.18317
6q14.3	NR_003038	387066	SNHG5	small nucleolar RNA host gene 5 (non-protein coding)	1.30164	0.380327	1.82e-05	0.0181385	51.0813	37.0528	62.7459	57.833	90.7813	79.8305	107.008	110.8	99.8854	84.7106	92.2702	78.2701	72.769	80.7894	63.7356	18.8974	27.4045	23.7575	19.5667	17.8344	13.3242	34.5599	31.9662	32.3904	36.0018	42.9012	43.4013	128.443	126.086	116.415	25.1328	29.6458	35.7428	54.3619	55.2973	45.418	26.4142	19.2663	30.7652	37.9527	25.1455
2p12	NM_004389	1496	CTNNA2	catenin (cadherin-associated protein), alpha 2	0.583125	-0.778123	3.17e-05	0.0287278	12.9171	9.40731	5.07041	6.88557	6.13692	7.34364	4.54134	3.79315	3.92202	0.502429	2.37804	1.77377	9.6157	10.6079	9.4435	6.88694	7.96468	7.10609	17.9792	20.4202	20.6222	12.8609	14.0496	13.5125	10.6466	7.84588	9.34176	8.13809	6.96238	7.99876	4.25613	3.86055	7.5318	5.43234	5.35395	6.37968	8.04267	6.8062	8.74153	9.75552	10.4285
4q22.1	NM_153757	266812	NAP1L5	nucleosome assembly protein 1-like 5	0.533797	-0.905638	3.93e-05	0.0288222	9.51389	6.50881	5.04317	0.328358	0.035021	0.13032	5.11471	3.85354	4.07285	2.87256	4.16169	3.54625	7.91925	8.82224	7.5571	4.39702	7.81797	5.54595	18.0308	16.5908	14.7688	5.6858	6.60245	6.35554	5.76639	8.60576	9.94607	7.07449	4.65548	4.79589	2.59189	2.34759	5.26646	4.51471	5.50774	4.35242	5.7382	6.25022	7.029	5.98577	5.73841
12q13.2	NM_002475	140465	MYL6B	myosin, light chain 6B, alkali, smooth muscle and non-muscle	0.920664	-0.119253	4.02e-05	0.0288222	58.197	58.4944	81.6428	78.725	78.0047	67.2607	54.5028	64.0354	56.8542	48.9984	52.4747	50.0875	72.8978	59.8453	69.3167	66.8417	70.007	61.2769	71.7456	69.3845	68.2233	79.3226	64.9726	70.7587	61.6349	89.8741	61.55	67.1186	71.559	83.6461	104.126	109.458	52.3137	72.2593	70.6224	72.1924	81.8715	83.2599	62.108	60.6026	62.9647
20p12.1	NM_013281	23767	FLRT3	fibronectin leucine rich transmembrane protein 3	0.493382	-1.01922	4.04e-05	0.0288222	3.3171	3.12979	3.87756	0.768588	0.596617	0.754286	10.8092	9.3417	8.77915	7.10768	6.92013	5.36412	6.74366	5.2759	3.47518	19.78	16.8345	18.5669	5.6721	5.04583	4.9487	9.89322	11.2878	12.2288	7.019	5.56067	9.05417	21.0183	14.363	13.5204	5.3671	3.64223	10.8202	10.1604	7.52264	4.99964	16.9599	10.6293	13.4038	7.14432	5.37269
2q37.3	NM_032515	666	BOK	BCL2-related ovarian killer	0.681299	-0.553639	5.13e-05	0.0341565	1.88216	2.35395	2.34905	2.89676	4.10072	3.55131	3.26566	5.20821	3.7635	6.54702	5.12174	5.87399	3.72345	3.97818	3.52128	5.06071	6.96331	5.87952	8.98608	9.00187	9.92568	5.47026	5.22135	5.9836	5.33387	7.92383	5.1646	5.42352	7.59983	9.32902	14.3845	12.9033	6.70707	7.26523	5.13514	5.93524	7.86926	6.58403	3.79202	4.24807	3.7005
3p26.1	NM_003670	8553	BHLHE40	basic helix-loop-helix family, member e40	1.28522	0.362013	7.65e-05	0.0477084	8.65513	9.38542	5.69272	12.8015	13.8644	12.711	17.6997	17.0778	21.2607	8.73767	7.73789	9.6661	7.59983	10.7553	8.52149	6.15978	12.281	10.1051	7.44267	7.19207	7.30584	7.30413	5.20301	8.06617	5.32126	4.02382	4.89311	11.2915	8.78864	7.83545	5.0705	3.40402	6.40854	8.01749	9.77421	7.6589	8.78722	7.23942	7.48772	14.7297	13.1568
17q21.31	NM_006373	10493	VAT1	vesicle amine transport 1	0.885218	-0.175896	9.5e-05	0.054609	33.0167	36.8409	33.8646	46.4374	43.4704	44.7647	34.5132	33.5783	34.286	29.4494	28.2494	32.789	25.5332	28.914	29.7495	41.3322	43.9338	39.5864	40.0235	41.9675	46.3533	60.2851	46.3438	59.2293	41.651	46.4948	40.7042	41.1866	46.3929	57.3924	64.5298	65.5819	38.2991	48.4512	47.8437	46.0336	49.1923	48.342	42.0565	49.4486	49.0012
8q12.1	NM_014729	9760	TOX	thymocyte selection-associated high mobility group box	0.61692	-0.696844	9.85e-05	0.054609	3.21411	3.66253	2.90926	4.98268	5.64251	7.08295	2.64723	2.30238	2.33343	1.03764	1.38713	1.28285	2.47166	3.9677	2.69933	6.51287	8.19141	5.54797	7.32432	7.65132	7.46691	12.588	11.6884	11.6424	4.98942	6.20175	7.23917	5.02313	4.35602	5.15789	2.18211	1.70189	3.82684	4.32245	4.17873	3.81079	4.44437	6.17985	6.17764	3.84828	4.76667
13q14.2	NM_052811	10206	TRIM13	tripartite motif containing 13	0.717603	-0.478741	0.000104047	0.0546412	3.41495	3.02371	2.58857	1.73488	1.5122	1.68381	2.31927	2.72818	3.02486	2.60546	2.74382	3.27637	3.5403	3.23577	2.2425	3.92745	3.61887	3.04852	7.29637	7.08824	6.04687	3.92329	3.56635	3.44717	2.54078	4.96039	4.23649	3.405	2.95181	3.54274	1.57953	1.96972	2.63003	2.84384	3.57168	2.64722	2.53544	3.18258	4.03912	2.88532	3.53885
19p13.3	NM_001405	1943	EFNA2	ephrin-A2	0.69898	-0.516676	0.000142217	0.0650555	5.06563	5.57375	6.31338	5.77917	5.71818	5.79315	4.52607	3.93025	3.79637	1.74837	2.06606	2.0031	4.42976	4.22604	3.68338	6.82982	7.92887	3.53292	7.10963	7.2637	8.96898	9.65298	7.0088	9.15603	6.1372	7.19119	5.91712	6.52065	7.64701	8.10197	8.31714	7.70312	4.74474	6.73274	5.56491	6.0808	5.50528	5.88372	4.36911	5.97391	5.25843
16p11.2	NM_181718	253982	ASPHD1	aspartate beta-hydroxylase domain containing 1	1.44024	0.526304	0.00014536	0.0650555	3.51789	4.33708	5.52087	4.92599	5.35254	5.91	4.64859	4.35662	5.60162	10.3149	8.28844	9.55404	4.5332	5.52155	4.77263	2.36015	3.2506	2.35046	4.21309	4.30805	3.91767	4.56097	3.94492	5.56551	3.25164	3.29865	2.62368	4.73394	5.51321	5.65055	2.88818	4.05471	1.46658	5.06643	4.40625	3.78507	4.01584	4.26006	3.28253	2.34638	1.84756
12q21.31	NM_182767	55117	SLC6A15	solute carrier family 6 (neutral amino acid transporter), member 15	0.692412	-0.530298	0.000148579	0.0650555	6.21954	4.6396	5.26103	2.03614	1.97888	1.9808	1.87713	1.51786	1.83246	1.99765	2.41683	1.98424	3.62493	3.46158	3.04843	3.10002	3.22474	3.96927	5.70189	5.59856	4.23031	2.96478	3.52292	3.75485	2.62218	2.59833	3.30797	6.42347	4.57651	4.7102	4.74497	3.46015	11.64	2.914	3.29124	2.93266	3.85874	3.68168	3.40754	2.95357	2.67478
1p34.2	NM_201542	112950	MED8	mediator complex subunit 8	1.26484	0.338955	0.000156201	0.0650555	8.44587	9.08325	10.2454	13.2349	12.8496	16.2182	16.0422	17.0695	17.4549	20.09	18.3301	17.9111	10.7056	14.0931	11.4674	13.4528	20.4909	16.8764	6.80001	7.58846	4.70713	10.6254	11.0494	11.5341	7.3425	6.44588	7.13093	12.2014	13.8405	12.8918	5.12859	7.1437	9.592	11.9479	11.368	7.945	15.1409	10.4312	12.0394	7.8465	7.04856
12q21.1	NM_031435	83591	THAP2	THAP domain containing, apoptosis associated protein 2	0.744377	-0.425894	0.000162777	0.0650555	3.79141	2.51737	3.04197	3.62224	2.99886	3.2555	3.15719	2.65501	2.87779	2.3899	3.05567	2.694	3.04344	2.94154	3.79423	5.05995	3.39602	3.14624	6.41705	6.37893	5.20092	4.17478	4.84835	5.38194	4.58026	6.40565	7.00794	3.08966	2.87137	3.20959	3.17009	2.30166	4.47142	3.7841	4.63602	4.06832	2.7822	4.04222	4.89886	5.98456	5.30939
1p22.1	NM_005665	7813	EVI5	ecotropic viral integration site 5	1.20666	0.271022	0.000164557	0.0650555	4.76478	3.42708	4.369	4.2084	5.25055	4.6038	6.28628	6.2774	6.22483	6.62903	8.62213	6.40264	3.87721	3.97463	2.5652	5.66509	5.14629	5.53045	3.90599	3.79028	3.81535	4.52708	4.44171	4.2561	3.4563	2.45637	3.88064	5.6685	4.90246	4.67827	2.50157	2.28465	3.83409	4.69668	5.25547	4.43095	5.16424	5.04062	6.05226	5.3924	4.67063
10q23.2	NM_003087	6623	SNCG	synuclein, gamma (breast cancer-specific protein 1)	0.617283	-0.695996	0.000169517	0.0650555	3.60627	3.64172	4.93491	39.3967	41.0927	44.8149	8.15784	9.3974	8.56063	3.43148	3.95337	3.62096	10.6252	11.7953	10.6173	18.5818	22.3615	25.797	19.4774	17.6065	20.086	46.324	39.9929	31.6587	9.90867	13.4034	9.7546	7.20742	10.9549	15.0536	23.7422	19.6052	6.68146	17.6253	14.8383	18.0554	24.1727	28.5858	20.9069	14.2052	13.616
12q23.1	NM_001032284	7112	TMPO	thymopoietin	0.717397	-0.479156	0.000180012	0.0656041	14.4671	9.08196	8.31529	11.2683	7.90555	8.60478	8.77006	7.67816	7.99992	2.73794	5.34312	4.17305	7.47969	8.52038	10.6988	22.3153	12.6125	10.2608	13.6718	12.0958	12.2861	13.9204	12.4188	13.7135	12.4555	21.356	14.9492	6.541	7.01214	7.57443	9.5237	6.99712	10.0715	11.3645	14.1994	10.6699	7.91742	13.503	13.8604	14.5392	13.0813
16p13.3	NM_014587	30812	SOX8	SRY (sex determining region Y)-box 8	0.675502	-0.565968	0.00020104	0.0656041	3.94411	5.71591	5.28248	3.55683	4.68463	3.56941	1.7893	1.84221	2.05278	1.47136	1.3296	2.04784	4.57199	4.58418	5.5563	5.46783	4.21422	4.97172	3.34228	3.075	4.59563	4.51746	3.5023	5.03011	3.80981	3.87382	3.32975	4.03366	4.27027	4.81322	8.5433	8.89225	4.748	3.91039	3.59103	4.32258	3.59274	3.43062	4.01466	4.8689	3.40483
15q13.3	NM_003020	6447	SCG5	secretogranin V (7B2 protein)	0.663425	-0.591995	0.000204468	0.0656041	9.94905	7.60245	12.6617	11.3686	12.7116	11.3196	6.37189	5.05444	5.86852	3.31247	4.59016	3.94013	19.2247	17.9737	20.0776	9.40844	19.0509	13.4677	38.6341	36.9579	32.8838	6.30837	10.145	8.74571	9.2349	18.5602	18.315	13.8631	9.99359	15.5669	3.26291	5.01569	6.85907	13.7681	17.57	16.4569	9.35701	10.4324	12.6601	14.6716	14.3562
7q11.21	NR_002961	677807	SNORA22	small nucleolar RNA, H/ACA box 22	0.91651	-0.125777	0.000216702	0.0656041	250.193	320.272	255.319	182.322	223.029	118.906	125.336	150.199	175.628	114.222	153.476	105.607	222.636	225.089	221.511	333.111	272.592	193.842	194.948	165.423	190.928	322.568	309.528	239.044	209.944	148.864	223.51	297.39	295.824	303.57	245.569	398.558	181.092	199.479	247.296	385.857	136.281	176.247	214.847	116.782	205.059
20q13.33	NM_031215	81928	CABLES2	Cdk5 and Abl enzyme substrate 2	0.80668	-0.309932	0.000219712	0.0656041	3.15647	2.85001	2.18136	5.00189	4.58389	5.81911	3.62069	3.35262	3.40171	3.24756	2.98341	3.23625	3.42002	3.66777	2.43228	5.36273	5.53516	5.22774	6.36451	7.14474	7.59635	3.98082	3.49451	4.80293	4.17109	3.53388	4.20764	4.72564	4.70792	4.6263	5.36021	4.46637	4.5475	4.66676	4.13777	4.03566	4.6135	5.02349	4.47263	4.45673	4.68224
19q13.4	NM_001009	6193	RPS5	ribosomal protein S5	1.03682	0.0521647	0.000230572	0.0656041	718.82	724.621	1121.64	894.72	1060.73	876.341	892.229	1024.33	943.82	873.884	841.363	897.721	908.851	1036.43	979.011	637.294	922.828	802.367	499.189	453.926	456.526	692.691	545.592	616.064	512.448	714.785	526.327	787.194	933.428	1009.33	701.22	807.315	362.733	805.368	771.919	795.941	941.578	957.929	723.088	585.745	465.38
16q23.3	NM_019065	54550	NECAB2	N-terminal EF-hand calcium binding protein 2	0.596981	-0.744243	0.000238481	0.0656041	5.9181	6.04462	6.36288	9.67467	9.19025	6.60237	8.51526	8.20409	8.32808	0.949303	1.64369	2.34627	4.33624	4.81541	4.12948	5.01801	17.0677	5.89907	17.6053	16.1003	16.1198	14.7161	11.4979	12.9384	12.857	16.3676	14.0666	17.1777	17.5412	23.2464	18.065	16.8281	9.1783	7.44226	6.96224	6.28736	12.8097	15.9726	13.2735	7.85873	9.51682
6q24.1	NM_016217	51696	HECA	headcase homolog (Drosophila)	0.800752	-0.320573	0.000239317	0.0656041	7.02819	5.11065	4.05564	3.83625	3.71074	4.35669	3.54894	3.42819	3.05267	3.54633	4.11749	3.22301	5.44729	5.49215	5.56197	4.39551	4.50181	4.25072	9.24613	8.75094	8.58104	5.81511	5.26906	6.3213	4.07912	3.82704	5.80191	4.95026	4.07557	4.58354	2.95718	3.08573	6.31952	4.46313	5.17994	4.81369	4.80466	5.66687	6.682	5.01814	4.6659
9q22.33	NM_018946	54187	NANS	N-acetylneuraminic acid synthase	1.16721	0.223058	0.000247059	0.0656041	15.0123	14.1068	12.8956	17.4295	16.276	21.6606	20.3698	19.4391	23.6316	25.4123	23.3033	25.9265	17.3452	25.1129	20.1912	20.0761	20.7286	21.222	10.8939	10.6	10.1997	12.6069	12.6641	13.8603	10.4557	10.1746	8.57174	18.2786	15.9668	16.2089	8.02106	10.088	13.1873	18.4202	19.0041	13.5135	21.0187	14.7427	12.8833	17.422	12.0626
14q24.3	NM_001107	97	ACYP1	acylphosphatase 1, erythrocyte (common) type	0.773703	-0.370148	0.000248721	0.0656041	12.5432	10.733	11.9503	16.5639	15.3589	13.6366	12.1758	10.5638	12.0074	5.24971	7.49155	5.1518	11.1657	12.1402	13.7272	14.4032	15.2436	13.4284	22.1662	22.9603	17.0127	12.9432	9.84629	11.3015	14.3502	19.994	17.9987	12.2978	12.4282	17.0787	20.2319	15.1782	9.50784	13.7558	13.5536	14.4893	13.1553	15.8493	12.5389	22.0619	19.2753
8q21.13	NM_001033723	619279	ZNF704	zinc finger protein 704	0.833544	-0.26267	0.000252975	0.0656041	3.52184	3.12897	2.07017	3.86628	3.37034	4.40812	3.92866	3.70398	3.35315	4.78717	5.12451	4.22288	3.30496	4.66159	3.20807	5.25059	5.22346	5.64737	6.97041	7.26077	6.66403	4.91501	5.33964	4.09789	5.47788	3.96248	5.40832	5.85325	4.58394	4.69055	2.70888	2.6139	5.48015	4.20477	4.68147	4.62029	4.6913	4.69877	4.82713	3.70232	3.6983
14q12	NM_006263	5720	PSME1	proteasome (prosome, macropain) activator subunit 1 (PA28 alpha)	1.11046	0.151164	0.000256944	0.0656041	29.8441	22.9365	33.7469	39.7723	45.7147	39.0386	48.9229	51.9305	53.3955	50.0578	54.2414	51.3187	39.4399	39.783	34.0137	33.3089	38.4859	34.1793	20.5715	18.4602	14.8271	41.8026	34.8262	36.9506	26.9631	28.8331	24.2914	40.9426	41.0179	38.7539	23.4369	23.013	25.886	37.3324	44.6539	34.5551	46.8237	34.2462	35.1631	28.4996	26.1904
5q31.3	NM_018935	56121	PCDHB15	protocadherin beta 15	1.6057	0.683199	0.000260261	0.0656041	6.62919	6.01993	4.0265	5.36684	4.69891	4.98464	3.57457	3.68074	4.03585	2.41222	2.93851	2.33444	3.37767	3.29465	2.89941	3.45892	3.26478	2.55095	0.849145	0.856297	1.08129	2.85603	2.85921	3.08519	4.81112	4.17518	5.18648	2.89638	2.49577	3.22335	1.05067	1.18036	1.47393	4.81321	5.07912	4.01769	3.86044	4.07074	4.20899	1.1874	1.45222
9q34.11	NM_178000	5524	PPP2R4	protein phosphatase 2A activator, regulatory subunit 4	0.639307	-0.64542	0.000269263	0.0656041	11.2326	12.6677	16.6911	6.28976	5.16461	0.477082	3.38257	9.21207	4.88912	5.83794	7.56893	10.2237	7.33543	7.50446	4.25333	9.68264	9.1342	11.7785	12.581	13.4837	16.8137	12.2306	10.8177	10.4016	5.76768	6.08087	10.2017	15.5468	15.7893	14.745	12.3767	27.8856	14.2193	13.1571	12.6696	11.483	10.9779	18.9586	14.3001	13.512	10.5573
20q12	NM_002660	5335	PLCG1	phospholipase C, gamma 1	0.822547	-0.28183	0.000276195	0.0656041	11.1305	13.1407	8.20451	12.3385	8.97187	12.5287	9.56045	6.3382	7.88417	7.40705	6.43217	8.99159	11.5966	10.9039	11.5895	10.7244	17.9951	10.46	11.6916	12.247	14.1917	17.3891	16.0908	15.2818	13.7852	11.5591	11.9722	10.41	10.7049	9.51044	16.3356	13.4659	15.3356	12.0068	12.9855	15.8189	9.68862	11.0103	10.4931	9.11509	11.9822
4q21.1	NM_006835	10983	CCNI	cyclin I	0.930557	-0.103834	0.000281091	0.0656041	134.974	119.315	124.865	158.568	136.713	158.736	105.439	101.828	104.762	104.914	123.82	116.522	128.556	123.407	156.803	100.72	130.855	121.094	230.753	238.391	263.041	135.091	117.977	135.825	153.272	228.379	164.595	120.577	136.979	139.422	166.83	155.843	173.924	163.821	160.012	150.99	132.279	161.984	171.183	128.356	151.454
15q15.3	NM_016400	25764	HYPK	huntingtin interacting protein K	1.25318	0.325592	0.00028272	0.0656041	12.3399	9.09991	8.85356	9.03035	10.2836	11.0671	11.3229	13.586	12.5341	9.03514	7.67829	8.76002	10.0844	9.75361	8.00344	12.9393	13.1905	12.3179	7.89912	5.85486	5.99762	8.83805	7.62185	10.701	5.23321	2.67381	6.69427	8.49751	9.07705	9.09983	3.51984	2.73041	3.57632	7.37056	6.16795	5.71195	9.58595	7.13171	7.38667	7.44676	7.32085
1q32.1	NM_005076	6900	CNTN2	contactin 2 (axonal)	0.580304	-0.78512	0.000296559	0.0672516	4.22983	5.94348	4.60764	19.9558	18.7946	22.388	10.9752	7.91006	8.36604	0.644565	2.50946	1.65171	4.07843	5.08088	4.45742	12.1734	25.9468	10.5667	14.4115	14.1537	15.9825	22.8967	19.6909	17.0479	22.8893	31.063	22.0656	12.2811	19.8764	17.4543	10.9356	13.0801	5.4609	11.6486	12.0389	13.395	12.7683	18.4812	17.6791	9.45998	13.9711
3q21.1	NM_006810	10954	PDIA5	protein disulfide isomerase family A, member 5	1.32516	0.406166	0.000311576	0.0673726	3.88627	3.8971	3.50598	6.64098	7.25883	8.5881	7.49292	7.04338	7.70399	10.5195	10.7391	10.0598	6.28506	7.26104	6.06507	5.68308	8.13699	8.19703	2.94607	2.94069	2.5079	5.75657	5.30364	4.99308	5.81926	6.13277	4.31158	5.48508	5.88204	5.16764	2.0781	2.76908	3.44403	5.7355	5.38104	4.16759	7.45151	5.61167	5.61588	4.1911	2.51828
1p36.31	NM_207370	387509	GPR153	G protein-coupled receptor 153	0.738601	-0.437132	0.000317164	0.0673726	6.61233	6.77888	6.62755	10.6018	10.3669	9.51707	4.83899	4.27829	4.7421	2.90166	3.00222	4.00156	7.03721	6.9268	7.55237	7.31624	7.84186	5.15199	11.0798	10.3592	13.0141	8.67879	7.25824	8.2163	8.28663	9.27607	7.26974	7.69559	7.58429	10.5022	15.1978	14.7543	7.25679	9.60293	8.8959	8.89047	7.29762	10.0757	7.7338	6.67697	6.29571
Xp11.23	NM_001032381	10084	PQBP1	polyglutamine binding protein 1	0.501817	-0.994767	0.000323679	0.0673726	2.1e-05	0	1.6e-05	15.9926	17.7757	14.9629	12.5176	8.98409	12.4393	5.97227	7.24864	8.46011	15.2131	21.0541	14.6604	12.4416	17.2428	14.3615	10.9537	15.6112	11.9723	20.9403	14.9348	20.1843	10.4151	11.1623	8.08011	9.55452	8.24312	12.8274	9.65086	9.50073	4.82798	14.8963	18.2106	15.6176	12.426	15.4375	9.94588	10.526	9.95012
12q24.33	NM_016155	4326	MMP17	matrix metallopeptidase 17 (membrane-inserted)	0.590845	-0.759148	0.000324101	0.0673726	4.34633	5.00292	5.13568	7.09203	8.03777	6.93224	2.39982	2.9402	2.96287	0.639915	0.652114	0.777912	4.13556	4.14505	4.23503	7.19979	6.17776	5.97412	6.71565	6.28113	9.47167	3.59447	2.45031	2.97682	4.97316	5.30895	5.06103	5.30428	6.71394	9.25829	16.9355	15.6197	5.90204	8.30449	7.64694	9.03677	6.2652	11.4713	6.61818	4.51959	4.70615
19q13.31	NM_014297	23474	ETHE1	ethylmalonic encephalopathy 1	1.3299	0.41132	0.000338477	0.0684058	9.98108	10.2123	14.1672	13.8827	19.9388	15.6733	15.8004	17.0058	14.8775	15.2925	15.7576	16.2075	14.1399	13.3034	12.127	8.71846	8.53035	6.4044	3.84432	3.95053	3.67467	10.5917	9.50217	8.86389	7.57056	9.57895	7.0734	6.94859	11.122	10.7777	11.0317	10.5841	4.81721	15.1657	12.5615	14.2547	16.4931	14.8319	11.627	8.44504	7.78802
13q14.3	NM_001011725	144983	HNRNPA1L2	heterogeneous nuclear ribonucleoprotein A1-like 2	1.28111	0.357397	0.000342783	0.0684058	13.5893	11.604	10.983	11.6035	14.434	14.9126	15.8848	16.1491	13.9292	16.6079	18.248	17.5458	11.8087	12.7847	8.12029	16.2879	17.2977	22.7206	9.06176	8.21066	9.17274	10.7626	10.2908	9.44545	6.78237	5.20444	7.85098	13.7228	14.7947	12.6891	3.41865	2.99936	3.68873	10.0976	11.5556	10.0715	11.668	11.435	14.5464	7.97152	5.9884
2p21	NM_005400	5581	PRKCE	protein kinase C, epsilon	0.671262	-0.575053	0.000351305	0.0687317	4.51457	4.05253	2.39965	2.04977	2.03124	2.13192	1.21674	1.36498	1.20674	1.14712	1.11241	1.38262	3.66252	4.21871	4.4483	2.56924	3.78663	2.91077	9.38014	9.77714	9.09135	2.66612	2.83866	2.46223	5.26387	4.29367	4.87127	2.48289	2.39773	2.39272	2.37602	2.36445	3.89201	2.21796	2.3908	2.12879	2.49077	2.2307	2.25624	2.19831	2.55446
22q13.31	NM_017911	55007	FAM118A	family with sequence similarity 118, member A	1.2409	0.311391	0.000394963	0.0757872	4.12074	3.79949	3.27093	6.09204	6.10076	6.19268	5.00345	5.29154	5.57462	8.7394	8.53715	9.41787	5.68226	6.4035	5.26546	4.77121	5.08666	4.52956	3.92284	4.03927	3.37165	3.63707	3.91435	3.77067	3.78755	2.01012	3.34438	5.56239	4.50287	4.17731	3.12353	2.83768	6.1055	4.57381	4.619	4.49052	5.40334	4.24324	4.39802	5.25586	4.39922
5q14.1	NM_002439	4437	MSH3	mutS homolog 3	1.24877	0.320509	0.000406051	0.0764448	4.62558	3.13295	3.76977	3.62353	3.31791	3.59487	4.0429	4.41624	3.77893	4.05831	4.95079	3.69905	2.71987	2.82051	2.23391	4.91472	4.5607	5.53457	3.17993	2.97431	3.03959	3.04379	3.06937	2.40677	2.52811	2.61313	2.96971	4.37207	3.63925	3.75354	1.59252	1.13311	1.8925	3.19128	3.48713	3.10319	3.577	3.5595	4.32049	2.3713	2.35555
3p14.3	NM_001660	378	ARF4	ADP-ribosylation factor 4	1.0671	0.0937	0.000438157	0.0807605	112.295	88.3824	104.166	126.117	133.425	136.241	121.139	136.611	147.063	105.918	123.372	114.358	134.539	151.077	150.999	90.4605	163.267	128.545	80.6489	80.4889	69.9969	65.9566	68.4861	78.7401	60.045	75.4198	70.3863	87.9485	92.732	88.5347	44.6981	39.2641	58.0611	119.014	131.302	106.033	98.0463	84.216	107.716	81.7658	68.7468
22q11.21	NR_037566	400892	BCRP2	breakpoint cluster region pseudogene 2	0.72263	-0.468671	0.000452898	0.0807605	1.2797	1.626	1.32981	2.36928	1.72795	2.24115	1.60898	0.990291	1.49967	1.39355	1.37772	1.8315	1.32926	1.64383	1.7907	2.30945	2.45289	2.24796	1.94957	2.59502	3.15688	3.28274	2.76798	2.6922	2.70442	3.05378	2.63636	1.40746	1.88826	1.64104	4.92346	4.41532	2.538	3.4045	3.10104	3.46077	1.61662	2.33775	1.78307	1.94976	2.06624
3p24.3	NM_002971	6304	SATB1	SATB homeobox 1	0.746666	-0.421464	0.000462153	0.0807605	2.91926	2.31522	1.73997	3.14755	2.18579	2.84147	4.08895	3.72885	2.81901	2.75351	2.88409	3.07437	2.25656	2.3969	2.16769	5.17881	4.35348	3.81646	3.41177	3.30741	4.04475	6.48071	5.98709	4.29495	3.36301	2.2651	3.36373	5.45204	4.66369	4.45848	3.5714	1.68048	8.21224	3.77829	4.6561	3.85625	4.08709	4.04872	3.94094	4.46646	6.11991
3q12.2	NM_020202	56954	NIT2	nitrilase family, member 2	1.24902	0.320802	0.000467714	0.0807605	6.37823	5.2611	6.17579	6.42693	6.74814	6.58848	8.31935	8.83394	7.71809	9.41108	8.8332	8.62504	7.56781	10.1795	5.55022	4.76781	7.35101	7.57778	5.66555	5.54812	4.95754	4.66546	4.92395	4.68147	4.58687	3.18535	3.32264	7.89025	5.64811	5.84441	2.65818	2.40432	6.38048	5.65412	7.48484	3.35493	8.87537	7.13477	5.08526	5.68601	3.76544
2q11.2	NM_025190	57730	ANKRD36B	ankyrin repeat domain 36B	0.736294	-0.441646	0.000469444	0.0807605	6.84104	5.78116	5.33459	3.8072	4.23793	4.35202	3.14786	2.62642	3.28508	2.42326	3.06299	2.14956	5.56702	5.11809	4.71991	6.95995	5.07853	5.58734	9.65347	9.06903	9.15091	5.09522	5.51998	4.79902	9.06957	4.244	8.5657	4.71359	4.1425	4.33957	2.74	2.84414	3.18094	4.07238	5.24461	5.33788	5.00079	6.06259	6.1286	4.19344	6.6222
15q15.1	NM_018145	55177	RMDN3	regulator of microtubule dynamics 3	1.12978	0.176043	0.00049846	0.0842988	8.42165	9.05767	7.91951	11.0409	10.9301	10.5624	10.0474	11.4857	10.9878	9.59977	10.3233	10.8467	9.66816	12.2925	11.6571	6.77712	12.7359	9.86301	8.18448	7.72094	8.25449	7.06851	7.32531	8.66407	7.56259	9.33345	7.03923	9.23161	7.86295	7.65162	6.46658	5.92237	7.23874	8.95278	8.78208	7.09106	8.38051	6.92155	7.84917	9.0735	8.98133
3q26.1	NM_000055	590	BCHE	butyrylcholinesterase	0.656564	-0.606993	0.000553528	0.0918388	8.23266	5.72296	6.82113	2.40118	4.4871	3.70163	2.8804	3.17212	1.71834	2.14435	3.29334	2.65382	6.48475	6.91267	5.86941	10.5794	10.7705	12.2675	6.15579	4.76988	4.90234	9.21031	9.45768	8.95447	5.62289	5.73494	9.00079	7.01994	4.3483	7.26526	5.74028	3.96918	8.84282	4.78877	5.25911	4.41365	6.93891	6.92845	7.97149	3.17749	1.48026
17q21.2	NM_016437	27175	TUBG2	tubulin, gamma 2	0.830628	-0.267725	0.000563982	0.0918388	7.21471	6.58158	7.51177	10.759	11.54	9.46824	7.55409	8.08086	9.10599	5.03382	5.32666	6.21757	8.6024	9.33581	10.0989	7.04982	8.66131	8.04765	10.0489	10.0494	10.8306	9.65227	9.36771	10.9204	10.7304	10.0246	10.8085	9.01707	9.83489	10.2683	14.8188	12.9116	8.31468	11.3404	11.3534	10.9069	10.4718	8.98634	8.30917	9.4584	10.91
2p25.1	NM_014746	9781	RNF144A	ring finger protein 144A	0.781295	-0.35606	0.000570656	0.0918388	8.47401	7.50458	5.94638	8.22671	6.73429	8.49814	5.91891	5.4386	5.83289	2.66145	3.06128	2.9058	6.87947	8.16248	7.87656	7.64883	10.0942	8.26497	10.5704	10.7092	10.4194	7.53582	7.39544	7.45806	8.5791	7.52794	8.28748	7.10909	6.17763	6.82554	5.41273	4.46763	7.20141	7.55157	7.96953	7.52535	5.3427	6.833	6.11472	7.73678	8.84061
6q14.1	NM_001199919	5238	PGM3	phosphoglucomutase 3	1.54766	0.630092	0.000583368	0.0923943	7.2394	5.91745	8.34637	6.83704	10.957	10.4304	8.98495	10.9734	9.7191	16.1274	16.7344	16.8065	10.3926	11.7274	5.53437	7.33316	11.1478	13.2717	3.92019	3.91422	4.10682	5.50043	3.47733	6.14209	5.34479	0.886037	3.57799	10.8769	10.8821	10.2644	0.933557	0.672379	1.87162	7.7871	6.96523	6.03071	12.7764	7.96457	10.594	4.97309	4.44107
9q31.1	NM_032342	84302	TMEM246	transmembrane protein 246	0.677807	-0.561054	0.000623781	0.0972514	6.74566	5.17298	4.77241	6.03257	5.57615	5.90921	6.50194	5.44976	5.45436	1.18908	0.737503	1.74057	4.07608	5.20265	4.74061	5.21344	9.1674	6.12196	14.2058	15.2635	14.1256	6.00847	5.54402	5.30296	7.46732	8.26194	8.33871	6.65727	6.36029	6.83021	5.36299	4.88091	5.90797	5.1859	6.20027	5.02873	4.5506	6.49472	5.06553	7.00134	8.06174
7p13	NM_000712	644	BLVRA	biliverdin reductase A	1.19462	0.256556	0.000644705	0.0983796	11.6747	9.06481	11.0107	12.3603	13.4146	17.3874	18.2434	19.8012	18.9521	17.6744	19.6612	18.371	18.0804	18.7459	18.1908	15.9672	13.9485	13.5712	10.4254	10.604	9.122	12.6125	11.0864	14.2634	7.17066	8.26558	6.63075	13.3422	12.5925	9.14515	5.87403	4.95371	6.89513	15.2426	15.3313	10.2124	18.8095	10.4368	13.8789	10.0065	6.63613
12q13.12	NM_006082	10376	TUBA1B	tubulin, alpha 1b	0.970709	-0.0428893	0.000650737	0.0983796	541.592	524.75	645.77	608.7	634.707	581.521	493.187	554.282	526.626	446.241	472.516	478.525	571.77	627.93	526.95	732.852	909.078	631.847	533.474	502.221	536.393	466.789	376.009	414.413	600.731	716.955	519.741	489.607	568.102	629.976	696.962	684.726	421.699	540.033	557.309	528.568	667.508	608.395	486.854	489.806	472.627
15q13.3	NM_015995	51621	KLF13	Kruppel-like factor 13	1.16216	0.216814	0.000673108	0.0991646	8.40414	9.29431	7.03704	9.77584	8.46929	10.1203	11.3341	9.46928	11.077	10.7073	11.0454	10.896	9.78881	11.3075	11.9287	8.98194	10.8261	7.46381	5.49118	6.1275	6.55134	9.36308	7.6132	9.74361	7.71006	6.30927	5.59637	7.00567	7.81667	8.24389	7.96836	7.34249	6.28861	8.40996	9.48823	8.08606	8.18034	7.46165	7.34261	5.52644	5.94823
15q13.1	NR_036443	440248	HERC2P9	hect domain and RLD 2 pseudogene 9	1.42424	0.510188	0.00067597	0.0991646	4.24079	4.71294	1.9733	3.27103	2.90244	3.56033	7.70702	7.23582	6.54809	7.10977	6.8677	6.41592	2.26505	2.84387	2.18685	4.34339	3.45116	3.10217	4.19446	5.68506	4.97069	4.58445	4.67979	3.94811	3.88731	1.53304	2.80612	2.88528	2.34449	2.49149	2.01756	1.6019	2.95886	3.2349	3.30919	3.53433	3.10263	2.46693	3.16394	4.15486	5.18594
9p13.3	NM_020944	57704	GBA2	glucosidase, beta (bile acid) 2	0.83627	-0.25796	0.000691803	0.0991646	10.0064	9.97224	9.3841	10.9615	9.37487	9.15166	10.8824	10.7046	11.2695	7.61844	8.47912	9.55686	7.91187	7.98605	7.64672	10.0835	10.7255	9.30536	14.2246	14.781	15.7878	16.2063	13.8921	14.5848	12.1872	10.8655	9.4003	10.943	11.7206	13.0141	23.1304	19.8264	14.3306	12.2268	12.8395	12.992	12.3263	12.3051	7.89739	16.0041	17.9885
19p13.3	NM_032108	10501	SEMA6B	sema domain, transmembrane domain (TM), and cytoplasmic domain, (semaphorin) 6B	0.732604	-0.448894	0.000695683	0.0991646	14.0643	14.6334	15.5635	14.3049	13.763	11.4031	8.99929	8.73076	9.41187	3.68347	4.1022	4.99312	11.7855	11.7783	14.4569	8.13449	10.8679	7.45709	20.4515	19.3232	25.3275	14.7691	11.2788	15.1971	18.6572	24.1385	18.6296	10.9912	11.8677	15.757	23.3801	22.8014	10.7605	15.0236	15.118	16.0555	11.7626	15.5424	11.9004	11.712	12.2609
6p12.3	NM_000255	4594	MUT	methylmalonyl CoA mutase	1.1984	0.261114	0.000714937	0.100474	10.4817	7.68267	8.89514	6.54659	8.96984	6.85661	9.14968	8.83296	8.53344	7.65316	9.42637	7.36051	8.27874	6.74331	6.24767	6.47399	10.1106	11.3203	6.08722	6.63823	7.08689	6.09652	7.09975	5.84849	4.0114	3.90547	6.83323	7.35843	7.12114	7.50624	2.46652	2.56944	3.40456	6.58321	6.6949	6.76927	8.48002	7.69916	9.71583	5.88975	5.93175
3q22.1	NM_021203	58477	SRPRB	signal recognition particle receptor, B subunit	1.17644	0.234424	0.000731912	0.101431	15.3176	12.6536	15.7474	13.1304	17.1009	15.5096	15.2702	17.3028	16.8501	21.4546	23.5003	20.9471	19.284	21.5218	15.2983	16.5252	16.4912	18.6179	13.6233	10.9499	10.6017	11.1079	12.5912	12.4775	8.7533	8.04226	10.0504	17.7953	14.7564	16.024	4.18414	4.143	10.7939	13.9125	14.5838	11.3286	15.7044	11.9643	14.5123	13.4494	10.5896
2q32.2	NM_007315	6772	STAT1	signal transducer and activator of transcription 1, 91kDa	1.24561	0.316855	0.000762039	0.103663	10.2388	7.18284	6.12741	5.81598	6.55046	7.50872	22.2476	17.893	20.3852	9.8618	10.9255	8.89966	7.53754	7.21455	5.24037	9.69402	8.11096	10.0752	5.72808	5.82504	5.94075	7.05714	7.55383	7.90146	7.24997	6.06612	6.08409	7.52273	5.92423	6.20548	3.1643	2.80606	4.84532	11.5905	13.7054	12.9674	11.5286	8.95505	10.4724	6.88767	6.10309
1q24.2	NM_003666	8548	BLZF1	basic leucine zipper nuclear factor 1	1.32157	0.402249	0.000799346	0.103663	4.24887	3.84343	4.78079	2.9304	4.73074	4.29327	5.03048	4.46104	4.63356	5.48927	6.82306	5.15269	4.14085	3.70685	2.64963	4.85344	5.14235	6.49331	3.35573	2.97886	3.35278	2.72288	2.55501	1.8999	2.84789	1.58561	3.264	5.55573	4.88453	4.88595	0.943794	0.979091	2.00156	3.76394	4.22141	3.89208	4.32451	3.25885	5.05365	3.93204	2.7971
Xp22.31	NM_004650	8228	PNPLA4	patatin-like phospholipase domain containing 4	1.4846	0.570075	0.000800123	0.103663	1.15867	1.00376	1.2279	4.36682	4.6064	4.8202	6.81891	7.48779	6.20577	2.98893	3.43377	3.31664	2.00294	2.7489	2.21976	1.95715	2.12712	2.27135	1.41823	1.71998	1.0216	1.9628	1.43805	1.65503	1.16567	1.31109	0.960451	3.30677	3.22513	2.9362	1.80776	2.04502	1.86943	2.1598	2.3103	1.88664	4.44306	3.79277	2.82103	4.16779	4.01527
1p36.32	NM_001010926	388585	HES5	hes family bHLH transcription factor 5	0.521827	-0.938356	0.000806254	0.103663	79.5753	77.0861	114.366	30.485	29.7953	23.9146	13.2124	8.51835	10.4418	0.285125	1.05935	1.5693	26.4513	30.839	35.3318	30.7313	73.0123	34.6797	44.4269	35.4589	45.3148	51.4994	42.2546	45.8844	59.224	78.7241	60.8474	17.1727	20.1595	35.5669	22.9069	31.2849	12.1459	23.4463	30.9291	35.7742	9.52778	19.0998	26.3562	24.3382	17.5117
12q24.33	NR_002979	677829	SNORA49	small nucleolar RNA, H/ACA box 49	0.87907	-0.18595	0.000810729	0.103663	2386.78	2667.76	2626.17	1213.06	1133.86	1217.68	923.191	981.119	1064.56	1207.69	971.968	839.016	2321.46	993.108	1179.14	1072.61	1559.15	1724.92	2237.22	1962.6	2920.01	1635.08	2113.99	1729.01	1888.98	939.994	1827.45	2344.81	2577.8	2113.24	1387.44	1874.02	1816.24	1454.68	1857.7	1754.45	1284.6	1356.43	1841.18	1410.36	1619.06
14q24.1	NM_004569	5283	PIGH	phosphatidylinositol glycan anchor biosynthesis, class H	1.21306	0.27865	0.000821631	0.103663	6.57886	6.37459	7.19707	11.2684	12.0756	11.6397	12.6057	11.6721	14.0419	18.0273	17.967	16.8499	11.6586	12.5564	12.2315	10.5486	11.1294	7.96629	9.62445	9.33397	8.85018	10.5432	10.1541	11.1867	4.75815	8.7472	7.65843	9.35574	7.10812	7.41763	4.15969	4.67655	7.76429	9.08596	8.13013	7.31347	7.81748	7.96234	8.40795	9.31047	6.04788
7q22.3	NM_006348	10466	COG5	component of oligomeric golgi complex 5	1.19059	0.251679	0.000837977	0.103663	6.45249	5.47897	5.83448	5.36743	6.34216	6.15853	7.2597	7.50708	8.04035	9.49352	10.5932	8.46857	6.22388	5.55476	4.93849	8.99036	8.36364	9.14414	4.60869	4.14986	3.68278	4.71407	5.89986	5.8962	4.33789	3.63525	6.12518	7.87232	6.8157	7.0752	2.76036	2.78433	4.62875	6.2682	5.79715	5.96494	8.50908	7.14254	7.07431	5.72255	4.22446
Xp22.2	NM_002765	5634	PRPS2	phosphoribosyl pyrophosphate synthetase 2	1.33007	0.411507	0.000843065	0.103663	3.41224	2.66309	2.69549	8.75572	9.87589	12.0726	9.05513	9.71454	10.5385	10.2736	11.3526	11.9537	4.22333	5.99651	5.13781	8.64469	7.58556	6.11037	2.80147	2.68837	2.75827	5.72004	4.98495	4.64296	3.39592	4.59378	3.35277	6.72828	4.84708	5.72457	2.72548	2.52538	6.93411	7.15916	7.24258	5.7115	7.39003	5.99018	5.79653	7.74773	5.63112
5q31.3	NM_018928	56098	PCDHGC4	protocadherin gamma subfamily C, 4	0.588553	-0.764757	0.000846593	0.103663	1.50364	2.69789	0.494353	2.34365	1.89549	2.06262	0.056187	0.789091	1.34823	0.567787	0.000717	0.263993	1.18853	1.82109	1.97358	0.841535	2.06908	0.798816	2.64098	4.93288	4.32639	0.712109	0.519355	0.759584	2.8059	3.14936	2.41135	1.64257	1.5914	2.21953	9.27663	8.35431	5.10016	2.95523	3.27469	4.54613	2.06429	2.96236	1.97824	1.97618	3.08192
21q22.12	NM_001757	873	CBR1	carbonyl reductase 1	0.793182	-0.334277	0.000851915	0.103663	14.3607	13.7678	18.8326	7.81169	8.54492	5.9173	15.95	19.9894	18.4725	10.132	12.9275	12.6581	15.1377	17.0018	16.1078	11.3745	12.8663	12.6192	16.6916	14.8022	15.7897	14.1427	11.5166	16.1945	14.4414	16.1183	13.5725	17.4478	18.7854	21.6944	70.0845	49.648	36.1184	17.1746	17.4286	17.0509	16.3788	17.3431	11.1602	26.3655	25.8615
2q24.3	NM_024969	80034	CSRNP3	cysteine-serine-rich nuclear protein 3	0.56273	-0.829484	0.000869879	0.104574	4.75636	2.70126	2.42818	3.71336	3.10962	3.90073	1.32976	1.40069	0.738315	0.000105	0.437471	0.434996	2.9337	3.37667	3.64307	3.13884	3.16992	2.53518	12.1104	14.0919	11.561	2.12146	3.38171	1.77554	5.86419	7.92833	8.8785	3.20862	3.00838	2.68888	2.62311	1.51946	4.12134	2.8973	2.82578	2.60961	1.54945	4.96527	4.04081	4.02775	2.46676
Xp22.12	NM_004586	6197	RPS6KA3	ribosomal protein S6 kinase, 90kDa, polypeptide 3	1.3055	0.384604	0.000886651	0.105321	3.31207	2.41581	3.04517	9.28737	9.72256	10.7815	10.3675	9.81384	9.09914	9.06275	10.8044	8.65113	5.88484	5.59124	3.90476	6.10851	4.86954	7.29584	3.36892	3.18488	3.62147	4.26067	5.00479	4.80032	3.19229	2.47188	3.84795	6.03889	4.74164	5.06477	2.35638	2.33168	3.76272	5.37513	4.74341	4.69178	8.12278	7.41669	7.94773	7.04626	5.88786
1p35.2	NM_024522	79570	NKAIN1	Na+/K+ transporting ATPase interacting 1	0.617853	-0.694665	0.000926804	0.10776	11.8615	15.3867	15.4802	18.3235	15.0195	16.7512	6.97176	5.58574	5.59671	0.805005	1.40907	1.35966	11.4611	9.79847	11.1188	13.313	12.7891	7.64189	21.7769	19.1238	21.5779	19.6262	16.0643	16.8292	12.3324	15.1491	10.9791	7.05801	11.0299	12.1695	12.5248	12.1547	6.50531	9.18988	10.3637	11.8063	8.61718	14.7598	12.7489	10.7699	14.7822
3q27.1	NM_018622	55486	PARL	presenilin associated, rhomboid-like	1.19305	0.254655	0.000942102	0.10776	10.9226	9.23257	8.83343	10.0997	11.2209	11.198	10.3691	9.28111	11.2168	10.1991	10.7324	9.94258	9.19632	10.6702	9.24279	7.19198	11.6877	9.92687	9.83965	8.79547	8.70441	5.73478	7.68146	6.81102	5.72119	5.30349	7.09953	11.6868	10.3194	11.246	3.2329	3.65028	4.55073	10.4088	6.79463	7.90493	11.3918	9.77731	12.7115	7.44982	5.46542
19q13.2	NM_152296	478	ATP1A3	ATPase, Na+/K+ transporting, alpha 3 polypeptide	0.588017	-0.766071	0.000948716	0.10776	25.9663	34.9233	21.8287	12.4858	12.4906	18.8449	5.23506	5.32519	4.51762	1.45994	1.54956	2.28747	9.13164	15.6254	15.0213	8.04908	12.6702	4.86545	41.6118	52.9276	76.7192	14.1533	10.4103	10.5712	19.8916	32.3724	20.3471	14.1295	15.201	19.9369	18.037	16.4905	12.0877	13.0356	16.1384	16.2063	13.4194	18.2796	10.1405	10.9188	13.6737
8q24.22	NM_006096	10397	NDRG1	N-myc downstream regulated 1	1.32204	0.402768	0.000950946	0.10776	8.00567	9.9479	10.7749	10.4897	14.2705	17.5549	19.9725	18.6516	26.7362	21.8239	22.9508	24.7104	16.6887	21.4171	17.1397	14.0182	18.5593	10.7969	7.04036	7.1626	7.13648	11.2403	10.8921	14.1015	8.68152	6.9017	8.90537	21.7749	21.0341	21.6109	4.26923	5.07785	4.61356	16.0209	11.4213	13.5157	14.8493	12.1103	9.65461	8.57156	5.93833
15q13.3	NM_017762	54893	MTMR10	myotubularin related protein 10	1.31468	0.394716	0.000961596	0.10776	1.92731	1.75479	1.44687	2.05461	2.37269	2.40451	4.41528	3.75339	3.83303	4.5095	4.79949	4.83424	2.76691	3.02004	2.25875	3.11812	2.65551	3.15855	1.37001	1.63007	1.53632	2.12823	2.21855	2.42501	2.00314	1.61937	1.75978	2.80509	2.373	2.28494	1.38102	1.02652	2.2397	2.0412	2.18201	1.9172	2.97362	2.37304	3.04291	2.42608	2.02616
17q11.2	NM_001267776	90410	IFT20	intraflagellar transport 20 homolog (Chlamydomonas)	1.28579	0.362653	0.000971977	0.10776	8.74333	5.61387	7.70276	9.41384	13.3593	14.7185	13.0881	12.9074	13.6955	14.4008	18.2883	18.3193	9.60565	14.4032	9.94995	10.7984	11.152	13.0593	4.32429	2.18365	3.79296	7.59232	10.452	10.017	4.93767	4.37753	6.03745	15.4269	11.8493	12.1939	4.29919	2.7746	6.05537	12.2768	10.9589	8.12364	13.3837	9.5054	14.2549	7.91568	4.62781
22q13.2	NM_004599	6721	SREBF2	sterol regulatory element binding transcription factor 2	0.879398	-0.185412	0.00101316	0.111091	39.7023	39.6127	34.498	41.0584	35.2217	35.0079	22.8465	20.2879	22.7307	22.0214	22.4643	23.4169	33.4724	30.8608	36.0188	28.2231	32.8573	30.3534	32.8295	34.5397	39.6766	41.9594	34.8634	39.988	30.3777	33.5229	29.8538	27.2014	37.0696	44.2549	43.0963	41.7117	21.8675	48.9901	49.9664	56.7563	33.9535	38.9362	37.0918	24.6169	32.5617
20q13.33	NM_025224	140685	ZBTB46	zinc finger and BTB domain containing 46	0.776674	-0.364618	0.00103078	0.111795	2.88616	3.30856	4.13514	4.34305	4.60251	4.3664	3.36088	3.266	3.02307	1.84378	1.83277	2.28251	3.28778	3.46686	3.36259	3.00444	4.06841	3.31136	5.37359	5.28658	6.47488	6.61383	5.4341	6.64609	4.04275	4.70811	3.46972	4.07427	3.67362	5.07863	5.27968	5.75965	3.61725	4.67723	4.5282	5.30634	3.8564	5.2127	3.85818	3.31802	3.31389
15q14	NM_016454	51234	EMC4	ER membrane protein complex subunit 4	1.06913	0.0964312	0.00106999	0.1148	28.9795	23.8987	26.2576	43.069	46.969	43.7235	40.8494	45.4245	45.7026	37.9237	34.649	40.7032	39.7783	46.9396	38.7733	36.4155	45.0338	34.4901	29.5376	25.3895	23.9967	24.9561	24.1219	27.4968	24.6737	25.8313	23.33	35.727	32.0521	33.7218	18.4725	21.5597	22.8101	40.6273	35.5389	25.9128	33.6396	30.356	24.4094	36.0087	30.6525
1q42.3	NM_003272	7107	GPR137B	G protein-coupled receptor 137B	0.845226	-0.24259	0.00114483	0.121484	6.87037	4.33219	4.56296	4.54883	4.24904	4.85574	4.22317	4.56674	4.91743	3.05709	3.43852	3.71605	4.70422	5.36858	4.95896	6.11215	5.55643	4.86143	5.77973	6.12473	5.51319	4.47758	4.68884	6.07129	6.27853	6.40604	7.53976	6.25683	5.90871	5.59929	4.7432	3.17749	6.16071	5.42415	6.16665	5.43202	4.74389	4.51617	5.49137	4.18201	4.94782
6q25.1	NM_001242768	25902	MTHFD1L	methylenetetrahydrofolate dehydrogenase (NADP+ dependent) 1-like	1.2723	0.347436	0.00115664	0.121484	4.72745	3.21767	3.07458	4.08225	5.02873	4.87686	6.53553	8.01047	7.5323	8.60134	7.57405	6.7253	4.5892	5.46881	3.94334	6.36356	5.66721	5.48595	4.64037	4.2775	4.27006	3.30227	3.53422	3.36682	2.82526	2.6651	3.68227	6.50576	6.30295	5.14164	1.95766	1.80605	3.76564	5.07101	4.76089	4.24369	7.73161	4.85489	4.61783	3.56183	2.87833
Xq26.1	NM_017666	55609	ZNF280C	zinc finger protein 280C	0.757226	-0.401204	0.00123971	0.128852	3.31854	2.80244	3.09366	2.96957	2.31761	2.78241	3.37085	2.59749	2.68303	1.84611	2.27312	1.66806	4.18221	3.65119	3.52408	3.08512	3.51857	3.59394	5.08022	5.35494	4.81424	2.93817	2.90142	3.57144	2.89988	2.81145	3.57068	3.15409	2.62831	2.71685	1.86733	2.26655	2.96743	2.53397	2.91987	3.12801	2.87119	3.69064	4.26933	3.88957	4.11914
11q14.2	NM_006680	10873	ME3	malic enzyme 3, NADP(+)-dependent, mitochondrial	0.638675	-0.646845	0.00125445	0.12904	0.71817	1.66334	1.86407	2.02878	1.4471	0.785204	0.898386	1.82212	2.03751	0.81382	1.15372	0.746793	2.18798	3.02511	0.821381	2.17711	2.55922	2.03571	4.56786	4.94024	2.30148	8.3291	8.62105	6.60879	3.64784	2.36511	3.41912	1.39678	1.25291	2.01657	3.24766	3.59836	2.63926	1.58836	3.50658	2.21556	1.78358	2.44108	1.34501	1.94836	3.12824
15q25.1	NM_007364	23423	TMED3	transmembrane emp24 protein transport domain containing 3	1.10026	0.137841	0.00127546	0.12929	41.9966	39.0415	64.2667	42.0685	51.9126	39.1797	41.2562	47.0332	46.0102	48.5297	49.8374	50.9429	49.0505	42.2381	46.1673	25.4485	37.0019	35.5412	26.8488	27.0416	23.8426	29.5658	24.2718	28.7706	26.2487	35.6058	28.7288	38.4597	46.1943	53.1883	48.2163	44.6999	22.3919	46.5778	44.5943	48.0468	55.4777	47.9626	37.8228	32.723	25.233
7p12.1	NM_001001550	2887	GRB10	growth factor receptor-bound protein 10	0.761505	-0.393075	0.00128279	0.12929	5.01124	3.29459	4.01366	2.52707	2.42369	4.45377	5.65972	5.71072	1.75345	3.19561	2.98779	4.97652	6.61629	8.12035	5.38101	4.92724	4.95069	7.68358	6.06679	7.36139	6.17217	6.57697	7.70546	6.07492	4.28193	4.08138	3.93646	5.58559	5.07099	5.50589	2.9846	2.66356	4.48374	3.10563	3.76296	3.95504	6.64661	4.69304	4.92904	4.08856	3.19569
3p26.1	NM_014674	9695	EDEM1	ER degradation enhancer, mannosidase alpha-like 1	1.26704	0.34146	0.00133941	0.13227	3.63028	3.04257	2.07747	3.96233	3.78028	5.33409	4.49071	4.4213	4.81823	6.84351	6.78712	6.28624	4.28555	4.61155	4.04166	3.30573	4.2597	3.88858	2.98872	3.43308	3.3312	3.52483	3.53923	3.58665	3.68322	2.58446	3.15264	4.33609	4.269	3.6789	1.24876	1.51561	3.15854	3.69325	3.6286	3.34484	6.07629	4.2252	5.06262	2.57294	2.33747
22q11.21-q11.22	NM_013313	29799	YPEL1	yippee-like 1 (Drosophila)	0.701886	-0.510691	0.00135735	0.13227	10.4203	9.08018	7.98737	6.77433	6.8982	6.57869	5.08442	4.76015	4.31609	1.25291	2.14439	1.59713	7.08627	7.24749	8.474	5.90132	9.59268	4.91437	12.5724	12.0745	11.8281	6.86679	6.63115	6.27594	10.297	9.61371	9.50295	7.1913	7.43903	7.0947	6.90836	6.86239	5.7146	6.71946	7.1573	7.13985	4.42366	6.78628	6.38926	5.48495	6.5769
19q13.41	NM_021632	59348	ZNF350	zinc finger protein 350	1.37323	0.457578	0.00136457	0.13227	3.15006	2.89481	2.52057	2.73439	3.69499	2.31007	2.78586	2.7347	2.53457	2.93804	3.82437	3.65519	2.97702	3.1203	2.61921	2.97357	1.5984	3.35385	1.96647	1.79504	2.52521	2.15332	2.34088	2.80391	1.75289	0.854976	2.0973	2.90179	2.76292	2.91855	0.391249	0.516203	0.472501	2.32831	2.02547	2.25637	3.15312	2.70611	3.23446	1.57332	1.77057
16p13.2	NM_000303	5373	PMM2	phosphomannomutase 2	1.2832	0.359748	0.00136538	0.13227	4.96448	4.62154	4.1935	10.5372	10.3914	11.9985	8.79457	9.43978	10.6228	12.6056	10.6338	12.4121	12.3483	15.574	12.8824	6.87861	8.61332	7.55091	3.76546	3.96572	3.63747	5.58777	4.82429	5.06777	5.97193	4.25294	5.06995	8.17352	7.6817	7.03169	4.49127	4.19648	4.9728	7.43444	7.20973	7.93394	9.50757	6.56161	6.55497	5.07025	5.13585
10q24.33	NM_032727	9118	INA	internexin neuronal intermediate filament protein, alpha	0.666123	-0.58614	0.00139248	0.132908	32.3802	32.5007	26.9755	48.6728	39.9282	48.0415	21.1438	17.1043	18.0327	2.15083	4.60808	4.60701	19.0547	18.9374	23.2823	25.8584	38.3988	17.8846	89.0726	82.0107	97.0012	21.4954	17.085	17.2554	52.5539	77.6263	55.7171	24.8225	27.1273	31.0325	36.9363	32.0645	30.3848	28.3739	27.249	26.3479	26.607	46.2845	33.6742	34.1682	43.2217
5q13.3	NM_001992	2149	F2R	coagulation factor II (thrombin) receptor	0.801544	-0.319146	0.00142713	0.132908	13.1099	10.0871	9.71676	10.4539	9.07995	11.3338	9.54239	8.501	8.857	3.5837	4.29215	3.86256	9.28102	11.949	10.7746	9.07053	13.5395	10.6769	11.6515	10.9859	9.6354	11.785	10.5711	11.8934	10.7928	13.1912	12.424	10.3737	8.22318	9.1583	6.70833	6.40298	14.6958	11.7437	12.4302	11.0971	7.93227	9.43887	10.7987	10.291	9.57627
11q12.2	NM_178031	54972	TMEM132A	transmembrane protein 132A	0.822825	-0.281343	0.00143374	0.132908	22.928	25.6695	25.7879	23.4658	23.4699	17.0727	21.0967	23.8589	18.0267	11.4303	10.6333	15.6437	26.9694	21.4189	24.8293	13.6049	22.2409	18.7799	26.791	23.0749	29.908	21.0971	15.9382	21.8148	19.8386	20.6781	17.5165	28.5165	35.0423	41.5168	57.873	50.6474	24.8487	35.0239	33.2081	30.685	22.0123	27.0992	15.9812	29.3293	35.1698
4p15.33	NR_126435	201853	LINC00504	long intergenic non-protein coding RNA 504	0.759328	-0.397206	0.00145835	0.132908	5.58128	6.86654	4.21432	4.58089	4.15977	4.5191	3.42775	3.20559	3.92828	4.21394	4.06006	2.97056	4.33415	4.09415	3.85846	5.60685	4.15312	6.3749	9.4021	9.83525	9.91082	4.89663	6.0004	3.86444	12.7689	7.32858	11.1996	4.33588	4.41887	4.74212	5.41592	4.57183	6.92612	4.292	5.50984	7.57102	4.13254	5.02122	6.72588	4.95711	10.583
3q27.1	NM_032331	9718	ECE2	endothelin converting enzyme 2	1.31977	0.400282	0.00145921	0.132908	4.48797	3.07373	5.03738	7.37662	7.24585	5.48932	7.55864	8.54617	10.2243	4.40726	4.39027	5.6912	6.04072	7.74285	6.14255	4.54607	6.80775	4.66441	2.77579	2.9504	3.49586	3.90583	2.59539	3.16648	2.58067	2.80305	2.46925	3.25643	3.69447	3.54309	4.18751	3.21607	2.48514	4.82981	5.33624	4.86802	5.18533	2.94601	3.94595	4.44967	3.43412
11q12.3	NM_002696	5436	POLR2G	polymerase (RNA) II (DNA directed) polypeptide G	1.03795	0.0537303	0.00146072	0.132908	61.7387	51.4183	72.0177	66.3675	59.0519	63.4518	64.1237	68.2758	73.9412	58.836	64.3926	67.9873	49.7596	63.9743	53.0665	63.4873	79.7357	65.6863	45.9038	41.0851	41.4079	52.211	45.4438	50.3908	43.7797	51.0059	46.513	72.3691	63.4364	59.9811	37.5064	35.6719	37.2453	63.3006	66.3524	52.5345	66.6396	64.7262	51.1133	50.6479	40.4951
3q21.3	NM_013336	29927	SEC61A1	Sec61 alpha 1 subunit (S. cerevisiae)	1.06385	0.0892952	0.00146671	0.132908	50.1471	54.6425	49.6098	66.5025	69.9143	73.0072	71.1834	73.4527	79.8536	88.4027	86.8417	92.8908	62.5957	70.469	63.1149	60.4332	64.8029	62.2859	44.4588	46.3264	50.4743	46.4614	42.5869	47.1048	50.9983	52.4343	44.3684	64.4936	73.348	73.7337	51.8203	50.3234	48.481	70.2205	69.2899	60.5649	86.1671	60.6181	57.7996	48.7226	47.5226
11q13.4	NM_173582	283209	PGM2L1	phosphoglucomutase 2-like 1	0.65438	-0.611799	0.00149169	0.132908	8.21561	5.72517	4.02918	7.66312	7.47888	7.92307	3.84495	3.62701	2.80002	1.16856	2.04133	1.45635	5.14985	5.16453	4.66681	6.25109	9.69997	6.50525	18.565	19.6366	17.8393	3.1531	3.16037	2.77225	7.69184	8.80171	10.4788	7.17358	5.88094	7.05826	4.24461	4.39896	5.7136	5.51121	6.44032	5.61061	5.32078	9.06843	8.56275	6.36211	7.60587
4q21.21	NM_001300735	153020	RASGEF1B	ras-GEF domain-containing family member 1B isoform 2	0.670757	-0.576139	0.00149879	0.132908	3.97842	4.07268	2.80973	3.2423	2.41028	2.9349	2.05761	2.11344	1.22549	1.65877	2.12074	1.27892	2.46566	3.8714	4.95281	4.32042	7.38638	4.26553	5.82096	5.52409	5.19376	4.63458	6.67782	3.95205	1.8217	2.73608	4.39998	7.0289	6.5808	7.58194	1.88768	1.04062	4.13078	2.33233	2.59159	1.96143	3.40812	3.35705	2.96458	4.40696	3.99331
11q12.2	NM_004200	9066	SYT7	synaptotagmin VII	0.623361	-0.68186	0.00151717	0.132908	2.30789	2.22823	1.52332	2.4455	0.732177	1.41105	1.05968	1.06857	1.44221	0.411814	0.534818	1.03356	3.31953	4.27804	4.86131	1.48187	2.06659	1.78036	2.86898	2.44914	4.3442	10.7142	10.4943	10.0014	2.43223	1.50219	2.80087	1.44073	2.90068	3.52485	2.91758	2.03974	1.30204	1.90085	1.73481	2.25052	1.99161	2.413	2.34356	1.11993	2.28048
11q24.2	NM_016952	50937	CDON	cell adhesion associated, oncogene regulated	1.28343	0.36	0.00151849	0.132908	12.1338	10.6692	7.31006	11.1416	10.1538	14.5198	14.5105	13.3082	12.8661	20.9374	22.9278	18.9065	13.7642	19.3967	14.9742	18.5403	7.90922	14.805	4.48064	4.95999	3.38025	12.3739	13.8472	11.9087	6.57605	5.30094	6.44416	12.5512	11.1734	9.3803	3.00475	3.69624	9.89347	9.88051	12.2883	10.9373	12.6394	11.1403	12.5601	7.3007	5.12413
1q21.2	NR_037182	653513	LOC653513	phosphodiesterase 4D interacting protein pseudogene	0.741689	-0.431114	0.00155024	0.133879	2.71345	2.29341	2.23489	1.75248	2.5753	1.52504	2.23258	2.49985	2.56882	1.59428	3.10174	1.6866	2.66494	3.63881	3.12437	2.51835	1.91567	3.59694	9.33626	9.13243	8.58465	2.45161	2.43495	2.02528	3.83221	2.58502	3.0863	2.98188	1.82224	2.29912	1.70965	1.67129	2.73978	3.48145	3.372	3.95966	2.39458	3.1557	2.98504	3.81254	4.02744
13q13.3	NM_013338	29880	ALG5	ALG5, dolichyl-phosphate beta-glucosyltransferase	1.20197	0.2654	0.00155643	0.133879	9.29704	6.73485	10.9449	10.4229	14.1601	12.079	13.4066	14.7762	13.8215	18.0076	21.431	18.2599	15.043	14.2211	10.144	11.9116	14.1419	13.8113	8.37213	7.91419	7.70585	8.24081	9.65807	11.3361	5.88423	4.89315	7.06628	15.6353	13.6486	12.7685	3.73935	3.53768	7.40556	9.868	8.44107	8.58059	15.8055	12.5218	14.2842	11.6139	6.8005
19p13.2	NM_018083	140467	ZNF358	zinc finger protein 358	0.875191	-0.192329	0.00158042	0.134782	12.1528	14.3739	14.2138	18.3734	17.6298	17.4462	15.7984	14.109	15.0743	20.0546	17.7083	18.555	12.4263	12.7301	11.8277	23.9623	16.6037	14.7485	17.4527	15.5329	20.4597	24.1165	19.7377	25.622	15.8614	18.5418	16.1869	18.2467	23.0487	26.1526	31.7751	27.2294	15.8794	24.192	20.489	23.0548	20.7299	21.9367	16.2779	16.5067	16.8207
7p14.3	NM_024051	79017	GGCT	gamma-glutamylcyclotransferase	1.30693	0.386181	0.00160806	0.135138	7.84458	5.75865	6.83412	6.46967	9.60143	7.77976	11.1418	10.6177	11.8221	15.2543	18.5434	12.7435	10.8794	11.7991	6.88238	9.16255	6.42615	12.3146	5.28142	5.5342	5.65861	6.5842	6.13272	5.75781	4.71388	4.23749	5.52875	11.0902	10.36	9.35857	1.7237	2.21328	4.12614	7.2216	6.24724	6.1955	14.4584	11.7581	10.6945	6.64218	4.97318
19p13.3	NM_001130	166	AES	amino-terminal enhancer of split	0.931076	-0.103029	0.00161427	0.135138	106.144	89.5877	114.109	86.8593	86.3039	76.4037	73.8906	75.8802	77.9087	52.1326	56.6657	57.6399	121.807	121.645	123.167	59.2311	90.9745	58.0267	94.3169	88.0697	101.106	118.527	90.5937	105.782	71.9146	86.8736	79.8647	74.7144	83.6587	104.408	98.8985	97.9162	58.113	100.822	107.794	102.459	79.4923	86.9235	68.1682	80.9734	83.5737
17p13.3	NR_028502	84981	MIR22HG	MIR22 host gene (non-protein coding)	1.59594	0.674406	0.00165995	0.135138	1.38131	1.64056	1.29647	4.2288	4.5068	5.3689	2.04673	2.65585	2.76412	3.76333	3.71513	4.02518	5.93801	5.97756	5.76794	1.17887	1.91413	1.72605	1.67722	2.11409	1.57122	1.39953	1.48339	1.26723	1.87864	1.22955	1.5163	2.98407	2.58755	2.63328	1.21743	1.127	1.65232	2.84262	1.57884	1.9844	2.60513	1.51286	1.52443	1.08178	0.930726
6q16.1	NM_015323	23376	UFL1	UFM1-specific ligase 1	1.21599	0.282127	0.00166662	0.135138	8.69894	6.3614	8.17724	7.72428	11.5608	9.0684	12.5447	11.9265	11.8989	14.3745	18.6022	15.2526	11.2566	9.83482	7.66748	13.4198	12.5641	13.9268	4.22637	4.8807	4.7653	8.26117	8.90738	9.83308	6.0296	4.8584	8.71671	13.2183	11.3118	10.9754	3.65146	3.65481	4.36172	8.95401	8.61202	8.277	11.4386	9.94346	12.7169	7.60578	6.26101
1p21.2	NM_001400	1901	S1PR1	sphingosine-1-phosphate receptor 1	1.30528	0.384358	0.00166836	0.135138	9.2936	8.96928	6.56514	11.6885	11.065	13.0208	13.7394	13.5421	13.7304	21.712	23.12	24.352	14.9879	15.4806	14.1823	14.6449	8.32663	9.59122	6.98189	7.42614	7.07823	5.42386	4.75591	6.7444	10.8442	11.5099	11.4877	19.2753	15.8006	15.2139	3.45248	4.04275	5.86052	10.8144	11.0087	8.59852	11.7124	9.51	10.4683	8.05769	5.41656
5q33.3	NM_001195555	9685	CLINT1	clathrin interactor 1	1.20173	0.265111	0.00168723	0.135138	8.83878	6.86298	6.20089	7.44624	8.76145	7.55439	10.4184	9.2631	9.5495	10.8617	15.1856	11.3713	5.22915	9.47815	5.44255	12.2761	6.67914	11.1755	5.72296	6.84244	6.66435	9.7951	8.32959	10.4169	4.59948	4.20323	4.11767	8.47589	7.61154	6.79545	2.92896	2.71106	4.62372	8.39012	7.11256	8.03753	8.38816	6.60183	9.81968	7.07823	7.32641
1p13.3	NM_020703	57463	AMIGO1	adhesion molecule with Ig-like domain 1	0.737794	-0.438709	0.00172175	0.135138	2.24593	2.33375	1.87346	2.81063	2.28834	2.30693	1.54813	1.09292	1.35466	0.31124	0.787438	0.578673	1.37288	1.56298	1.70269	2.09858	2.57195	2.07328	4.16112	4.2064	5.72383	2.92862	2.57721	3.29491	2.88252	2.58219	2.96913	2.76061	2.15151	2.16908	3.72084	3.22765	3.45579	1.59402	1.88833	1.63791	2.08865	2.82778	2.23668	2.73691	2.51775
11p13	NM_001001391	960	CD44	CD44 molecule (Indian blood group)	1.67347	0.742846	0.00175334	0.135138	1.27876	1.38197	1.19556	3.21755	2.47143	4.68905	3.61881	2.37879	3.19118	14.7121	16.5138	15.1821	3.17811	3.30363	1.59938	1.47748	0.849969	2.29797	0.671314	0.719886	0.733853	1.12307	0.941566	1.71779	1.97179	2.34506	2.69828	2.289	2.42495	2.49559	0.925478	1.27913	2.04171	4.96722	3.56514	3.15783	4.38418	4.16412	5.06386	1.62179	0.692348
9q21.13	NM_001490	2650	GCNT1	glucosaminyl (N-acetyl) transferase 1, core 2	1.72778	0.788921	0.00176974	0.135138	1.34567	1.19847	1.00068	1.90648	2.27162	1.68485	4.70205	3.85416	4.63763	7.75374	10.8644	9.09361	2.11161	2.47952	1.11461	3.52502	1.3915	2.7452	0.538213	0.41884	2e-06	2.72501	3.19745	3.36232	0.494655	0.982964	0.836583	3.79602	1.75327	3.38423	0.374126	0.543977	0.364082	3.37998	2.51289	4.22068	3.03747	2.84873	0.782584	0.841772	0.517449
19p13.3	NM_152769	255057	C19orf26	chromosome 19 open reading frame 26	0.726275	-0.461412	0.00178341	0.135138	4.91045	3.57058	3.7737	4.86352	3.74483	3.91148	1.44108	1.38605	2.52157	1.63203	1.49289	2.07011	4.45047	4.28976	4.59339	2.75388	3.39971	2.41232	4.19803	4.37287	5.86035	3.90689	3.40875	4.15101	4.4939	3.77533	3.48866	3.30594	3.17513	5.08361	4.62816	4.91782	2.58529	3.76856	3.44218	4.35602	3.02543	3.71244	3.71937	3.16297	3.34434
Xp11.3	NM_173794	139341	FUNDC1	FUN14 domain containing 1	1.18265	0.242022	0.00178656	0.135138	12.3203	7.67075	11.2735	17.2337	19.9012	14.2035	14.0878	11.7837	11.8417	9.12178	8.16503	8.4938	10.9525	9.95365	7.42934	8.92487	9.2158	7.40124	12.1684	8.80728	9.20255	9.58106	10.3469	9.67322	5.84793	5.65409	8.52665	9.72581	6.79691	8.61317	2.98887	3.1313	5.74307	7.15946	8.34151	6.81974	12.3203	10.8312	11.1844	13.7702	10.3834
2p16.1	NR_125368	100129434	LOC100129434	n/a	0.808073	-0.307443	0.0017905	0.135138	12.9451	14.2266	8.34749	12.8816	9.70965	11.8585	9.00977	7.77734	9.66053	11.453	9.07414	7.68435	10.8695	10.2022	10.2636	14.8424	10.4724	16.3076	21.5091	23.3902	21.8097	10.6789	13.9606	9.5238	32.3113	16.9036	28.5355	9.47007	10.6103	10.6287	14.2204	11.0963	17.8006	11.1234	13.2758	17.8218	11.8034	12.2438	13.7571	13.5049	24.9991
11q13.4	NM_001130035	58473	PLEKHB1	pleckstrin homology domain containing, family B (evectins) member 1	0.66476	-0.589095	0.00179374	0.135138	2.24911	2.58604	2.88707	2.7993	2.49913	1.82218	2.43838	3.30574	2.91406	1.83173	1.10763	2.63206	2.70301	2.6706	3.1875	2.99708	5.22083	4.08044	2.17155	1.85652	2.67597	7.7786	7.87956	7.64466	3.29034	3.04689	3.12759	3.14679	4.27712	3.98067	7.08229	5.1663	3.71351	2.95556	4.41738	2.5769	2.54493	2.96662	1.95634	4.93103	6.0256
6q22.32	NM_001012507	387103	CENPW	centromere protein W	1.38757	0.472557	0.00180258	0.135138	3.95878	2.10528	4.01815	3.85879	2.67093	3.84698	4.55401	4.99648	6.16771	5.68252	6.74902	5.11281	3.46475	3.10163	2.94211	4.56455	4.55464	4.67023	1.94368	1.4622	1.87437	2.77768	2.97592	2.97856	2.31522	3.13004	1.40932	4.27557	4.36244	3.99136	0.850154	1.2253	1.99857	4.45058	3.84074	2.80171	4.3769	3.75	5.32644	1.49528	0.977906
10q11.23	NM_001290117	100652748	TIMM23B	putative mitochondrial import inner membrane translocase subunit Tim23B isoform 1	1.22939	0.297942	0.00181625	0.135138	3.36957	3.36373	2.75119	4.78011	5.59343	6.2316	4.3868	5.3873	4.99538	5.76839	5.80262	6.38989	7.54881	6.55853	5.51417	4.60604	5.00985	3.90333	4.94716	3.84546	3.71922	3.59281	3.491	3.18162	3.37932	2.19973	3.3575	5.28175	4.72889	4.26962	2.32632	2.17633	2.81157	3.77103	4.13542	4.19451	4.77818	3.7585	3.22056	3.18797	3.19285
17q21.33	NM_002507	4804	NGFR	nerve growth factor receptor	0.677781	-0.561108	0.0018183	0.135138	3.05787	3.71375	4.13361	9.25739	12.1448	10.3707	4.51363	5.04696	5.35622	2.16661	1.73632	1.79917	5.95324	6.93662	6.14925	5.74682	13.449	10.4508	4.30263	3.83096	3.96703	12.1153	7.53876	9.10853	8.60075	5.56959	7.2876	7.86805	5.09247	8.68454	22.4517	18.8064	12.7606	11.9975	9.44786	9.32404	9.61176	9.87671	7.2879	4.54237	4.81757
2p25.3	NM_004300	52	ACP1	acid phosphatase 1, soluble	1.07971	0.110644	0.00181832	0.135138	28.0763	21.3008	28.0153	31.7358	33.9539	34.467	37.2171	44.2042	49.8233	33.4607	36.9485	36.4228	33.5083	40.9196	28.4641	23.6881	35.6006	25.6854	27.6996	23.461	20.986	23.0829	23.1514	20.7883	15.7102	28.9334	24.0992	36.0366	26.4794	30.7818	13.1232	12.5051	25.9525	30.8952	34.3307	27.5531	33.6794	30.9679	27.2246	33.5238	23.7177
7q11.21	NM_001007253	2086	ERV3-1	endogenous retrovirus group 3, member 1	0.741291	-0.431888	0.00183704	0.135138	1.89161	2.00806	1.50191	2.24533	1.4517	2.4796	2.60733	2.19122	3.57062	3.08982	2.58476	2.95439	2.00589	2.67628	2.26649	5.46436	3.55238	5.20152	3.93738	3.81064	3.60332	3.58567	4.63503	2.90344	6.02825	3.83262	5.70947	2.78748	2.72999	2.86822	3.20321	3.41588	4.26345	2.25021	2.10249	3.15054	1.6294	2.19084	2.07842	4.27728	5.19789
6p25.2	NM_178012	347733	TUBB2B	tubulin, beta 2B class IIb	0.813118	-0.298463	0.00184193	0.135138	501.157	553.581	532.428	434.773	414.935	394.37	204.717	151.79	176.586	20.4436	38.5654	38.015	375.056	373.589	444.849	153.384	412.581	159.844	835.001	741.378	882.867	150.098	119.124	120.96	491.408	682.413	502.87	284.568	329.674	423.009	332.998	405.665	159.711	274.048	319.458	302.558	243.331	365.272	277.344	279.437	329.734
2p14	NM_015463	25927	CNRIP1	cannabinoid receptor interacting protein 1	0.679757	-0.556908	0.00186374	0.13574	3.93306	5.07961	4.55986	6.68431	6.87472	7.58536	2.99598	2.9635	3.02574	0.995981	1.65042	1.80561	2.72951	3.47487	2.60776	5.26034	9.18092	6.1686	16.7329	15.4966	15.0099	5.09349	4.46005	4.2241	7.65782	10.1769	9.37892	4.81257	5.03154	5.12048	3.70339	3.73656	3.78497	4.76851	5.57998	4.53222	5.11709	7.26094	5.66059	5.27012	5.00885
1q32.1	NM_001684	493	ATP2B4	ATPase, Ca++ transporting, plasma membrane 4	1.17435	0.231867	0.0018815	0.136041	15.1659	15.5811	9.48366	17.5222	16.8406	21.7246	18.9134	19.3265	19.1134	31.84	35.6347	28.0048	13.0269	19.2988	13.957	19.7122	14.31	18.0388	10.538	10.6697	10.9615	16.9928	14.7353	16.0456	20.8342	15.9607	18.027	15.9672	15.8231	15.7013	6.3218	6.60788	15.8046	16.0092	17.5888	15.8329	22.5675	18.9419	20.8767	11.2339	10.5793
10q22.1	NM_018649	55506	H2AFY2	H2A histone family, member Y2	0.899513	-0.152784	0.00193506	0.138253	28.487	29.0525	25.4551	37.5493	33.9605	37.459	26.9689	26.6627	27.5069	14.5728	17.4022	16.8369	27.0784	29.5067	28.5488	31.1281	42.7394	24.494	34.9382	32.3567	35.0479	33.9013	28.7504	31.2648	28.4885	33.6458	24.5421	28.1163	32.5764	37.1424	26.4635	29.7954	19.5242	31.2702	32.5603	28.5022	29.2487	29.4372	27.2223	28.3232	29.1637
5q35.3	NM_015111	23138	N4BP3	NEDD4 binding protein 3	0.766422	-0.38379	0.0019668	0.138253	1.49176	1.70581	1.44015	2.38226	2.2248	2.32314	1.99959	2.04968	1.83109	0.662308	0.780431	0.998051	1.16523	1.50013	1.76286	1.18626	3.12019	2.9902	4.64802	4.63999	5.41762	2.39316	1.989	2.08675	2.23709	1.68663	1.68163	2.409	2.5763	2.65445	4.11211	3.48005	2.26514	2.33887	2.1352	2.06627	2.20035	2.24517	1.57163	2.61154	3.05727
16q24.3	NM_006086	10381	TUBB3	tubulin, beta 3 class III	0.835167	-0.259863	0.00197524	0.138253	282.852	317.241	297.548	364.289	351.183	329.796	152.911	133.986	150.645	21.3005	33.721	36.7217	228.352	257.371	274.698	124.302	352.282	109.884	507.166	445.765	541.955	196.142	153.842	156.901	296.353	377.443	265.664	223.218	251.213	338.812	214.188	237.704	92.4165	208.555	227.359	222.496	179.344	269.421	198.652	196.752	223.795
17q25.1	NM_014230	6730	SRP68	signal recognition particle 68kDa	1.17948	0.23815	0.00198323	0.138253	9.77579	8.56764	7.53659	11.9269	12.613	10.5376	12.2912	11.6913	13.7224	14.2306	15.5573	14.8757	11.551	12.5582	9.25214	10.8628	9.01606	14.6624	6.13515	5.93955	5.60564	11.5313	12.0495	14.1414	5.79266	5.38552	6.13221	7.98375	11.5687	12.9931	3.56903	2.76373	8.1148	10.6551	11.9095	9.25374	10.5536	10.6905	11.6815	9.01219	8.54218
17p13.3	NM_021962	29	ABR	active BCR-related	0.780466	-0.357592	0.00198947	0.138253	12.4908	12.388	6.80745	6.96488	7.19296	9.21142	8.35303	4.97326	7.12087	5.89633	4.09135	3.74805	8.13462	10.4589	11.0315	4.89161	6.1266	6.08791	11.6636	13.6064	17.0346	13.0905	11.9573	16.1838	12.3657	6.46671	9.55497	8.93703	7.0718	9.95619	13.9556	10.6066	8.98755	10.6642	12.1146	10.4222	8.49496	9.11489	6.47334	9.89824	11.7805
1p32.1	NM_002353	4070	TACSTD2	tumor-associated calcium signal transducer 2	1.22181	0.289024	0.0020002	0.138253	0.532469	0.206338	0.251524	0.216156	0.493975	0.490215	0.207851	0.365239	0.278587	1.88073	1.24275	0.833766	0.694567	1.20472	0.929717	0.171072	0.029887	0.065997	0	0	0.025719	0.505752	0.468544	0.331991	0.060589	0.032503	0.030668	0.2737	0.275482	0.501017	0.308964	0.220778	0.235821	0.625043	0.139214	0.16502	1.00305	0.661307	0.365226	0.175918	0.055342
19q13.12	NM_015526	25999	CLIP3	CAP-GLY domain containing linker protein 3	0.814481	-0.296046	0.0020229	0.138253	23.8036	23.5974	14.038	19.0289	14.1349	15.4854	12.4341	10.0016	10.769	7.45895	7.3506	7.91161	16.683	15.328	18.3984	9.44344	13.2169	11.725	16.7434	17.3153	18.4877	19.6226	16.4665	19.2115	19.0012	20.2012	19.3909	12.7338	15.598	19.011	27.1541	23.5185	15.47	20.977	24.3571	25.6591	15.9277	16.9576	17.7929	13.3792	17.9488
6q21	NM_032194	84154	RPF2	ribosome production factor 2 homolog (S. cerevisiae)	1.24554	0.316768	0.00205186	0.138253	3.72921	3.20441	4.40625	4.48137	4.23766	4.18059	4.79367	5.13072	4.41584	5.1145	7.22574	4.94237	6.47685	5.37953	4.41803	6.16691	4.23684	6.02689	2.91919	2.58738	3.02107	3.18641	4.231	4.09795	2.03382	1.92532	2.88996	4.99817	4.02119	4.15872	2.04439	1.63421	3.51866	3.98675	3.51596	3.01882	4.29796	2.9631	3.49038	3.40648	2.85061
10q26.11-q26.12	NM_007190	11196	SEC23IP	SEC23 interacting protein	1.17428	0.231771	0.00206183	0.138253	4.19725	3.49154	3.16631	4.93501	5.25955	5.16142	5.72502	5.95596	5.48475	6.27044	7.65322	6.51833	5.47119	5.63052	3.70284	6.74386	5.76389	7.64872	3.63269	3.51879	3.44681	3.70569	4.44716	4.34615	3.38896	2.24043	4.12827	5.55233	4.7499	4.60734	2.14049	2.03465	3.07227	4.90962	5.56771	4.78612	5.57528	4.64573	5.50467	3.79359	3.96757
11q12.3	NM_012202	2785	GNG3	guanine nucleotide binding protein (G protein), gamma 3	0.65845	-0.602855	0.00206363	0.138253	28.7862	31.8462	31.2749	46.6036	45.823	48.1764	16.1107	14.2838	14.0112	1.73407	3.13543	3.43981	21.9973	26.9444	28.1642	22.1287	54.6992	18.5445	66.1857	64.8382	67.0234	22.467	20.6556	19.4613	34.5473	42.2671	38.5672	27.3551	31.5726	36.6889	27.4582	24.7738	12.389	17.479	22.7394	20.3084	22.7718	33.92	28.3617	18.6733	30.353
19p13.13	NM_005809	7001	PRDX2	peroxiredoxin 2	0.958287	-0.0614707	0.00206451	0.138253	175.402	167.577	215.509	247.187	230.635	204.172	215.447	215.312	220.909	120.313	130.95	135.809	196.771	207.039	195.073	169.359	264.519	193.763	190.609	176.701	172.517	208.039	180.503	191.582	163.282	217.169	154.958	177.428	197.3	233.281	263.979	263.983	132.962	203.436	213.036	203.126	199.375	212.415	148.208	224.661	197.516
8p21.2	NM_006158	4747	NEFL	neurofilament, light polypeptide	0.695299	-0.524294	0.00208031	0.138382	9.04891	8.08041	6.44461	67.9025	78.3303	89.6681	19.1557	20.2629	16.9493	7.49794	11.5049	10.7912	8.64054	8.78816	6.91	49.4229	58.1904	53.601	111.852	96.5089	99.4944	18.6821	19.1035	19.0131	28.9266	38.3155	40.0979	45.8549	32.8503	43.1886	29.532	31.6881	52.4975	29.0475	27.7286	25.9009	42.775	51.4197	55.3808	59.0501	42.6047
21q22.11	NM_014825	9875	URB1	URB1 ribosome biogenesis 1 homolog (S. cerevisiae)	1.18815	0.248712	0.00209834	0.138657	2.57239	2.9313	1.8351	3.58407	3.01975	3.33539	3.26223	3.64916	3.97197	3.80295	3.32135	3.69336	2.57855	3.45075	3.14337	3.06584	2.69578	2.63884	2.70551	2.97636	3.15404	2.80046	2.40753	2.28321	3.18313	2.60593	2.16044	2.81616	2.75819	2.87237	2.52782	2.48676	2.85981	2.90946	3.49446	3.27899	3.24569	2.89409	2.41005	2.005	2.86923
8q12.1	NM_052898	114786	XKR4	XK, Kell blood group complex subunit-related family, member 4	0.639915	-0.644049	0.00211913	0.13911	2.30593	2.12392	1.33893	3.54467	3.69351	3.43854	1.18217	1.4201	1.17349	0.418691	0.822273	0.535271	1.22042	2.01058	1.38736	2.7015	4.74222	4.14766	11.0028	12.3739	10.5192	2.30209	2.07745	2.02979	4.29585	4.03082	4.88225	2.95314	2.46306	2.35662	3.43194	2.66635	6.99061	1.68546	2.08552	1.76602	2.43318	3.52591	3.46731	2.58566	2.84894
11q24.1	NR_024430	399959	MIR100HG	mir-100-let-7a-2 cluster host gene (non-protein coding)	0.693948	-0.5271	0.00213787	0.139422	20.0233	16.3689	19.8799	15.6836	19.3562	17.1944	7.99017	7.34095	7.38875	2.95426	4.77399	4.06707	11.1368	9.70973	9.32587	16.0315	16.5884	16.2877	43.6003	40.6922	35.4215	9.02736	9.62205	9.59123	26.3279	25.5128	42.9152	18.3572	14.9069	17.8598	7.07646	7.99702	14.634	12.4842	11.9258	11.0944	11.584	15.9372	18.6154	19.8317	20.5329
4p14	NR_047679	100885776	UGDH-AS1	UGDH antisense RNA 1	0.822814	-0.281362	0.00220179	0.142384	15.8773	18.3473	11.8046	13.7188	11.4372	14.083	10.817	8.91797	11.6769	12.8197	12.7753	9.38714	11.5618	11.4292	11.9413	17.6843	11.5467	19.402	24.7271	26.0597	24.1864	13.609	16.4876	11.0726	37.0357	21.3663	32.1092	11.9289	13.1893	12.9	15.3434	12.2526	19.7421	12.2031	16.0163	20.0426	13.6723	15.3377	18.0476	16.1691	31.9993
13q32.1	NM_006260	5611	DNAJC3	DnaJ (Hsp40) homolog, subfamily C, member 3	1.20084	0.264047	0.00221463	0.142384	7.55378	6.04786	6.57719	7.54811	8.99206	8.1159	8.80098	9.2121	8.521	14.0191	17.0634	12.6221	9.0638	7.77775	6.14148	11.5356	9.55865	10.8362	6.53277	5.94984	5.43239	6.63535	7.18674	7.44922	4.33633	3.80236	6.66583	9.81114	8.50948	8.04743	2.61089	2.4632	5.2756	8.29785	7.79327	7.39392	10.855	8.62492	11.3912	8.25683	6.00575
15q13.1	NM_138704	56160	NDNL2	necdin-like 2	1.14606	0.196682	0.00225874	0.142384	16.2794	12.6393	15.3913	17.9282	19.7957	16.2356	33.2657	37.8079	36.977	38.7097	46.4428	42.1355	26.6116	20.9691	25.1458	20.3295	17.3517	13.4467	14.7226	13.1904	13.5982	19.837	18.3342	20.8666	12.5591	14.7071	13.0614	18.5522	20.3517	18.2487	21.936	18.4692	16.0633	18.4668	17.3771	16.6198	20.1782	16.6677	15.4136	20.9586	16.1441
2q33.1	NM_144629	130132	RFTN2	raftlin family member 2	0.683043	-0.549952	0.00226636	0.142384	2.85943	2.25023	2.90998	1.27992	1.66269	1.4881	1.94293	1.51106	1.28625	0.664377	0.992692	1.21952	0.624711	0.584976	0.343762	3.08037	3.01961	3.64774	3.79758	3.45509	3.58017	2.82942	3.13827	3.00725	4.84544	3.87415	6.49539	2.45961	2.09868	2.97393	2.04508	1.6446	2.57332	2.32566	2.30604	2.39205	2.37307	3.38017	3.9514	2.14242	2.00575
8q22.3	NM_005655	7071	KLF10	Kruppel-like factor 10	1.20021	0.263282	0.00227321	0.142384	6.89122	6.24113	5.76583	18.1572	19.6752	20.2284	17.9557	18.273	17.9022	19.9166	20.669	21.8019	13.1737	12.9362	12.1056	11.6066	20.0241	12.5338	5.97459	6.21599	5.82446	7.95223	6.75931	6.7103	8.87621	9.21698	12.2799	17.0353	15.0062	13.5506	4.87793	5.01552	8.26637	14.9309	14.6583	12.1991	16.7079	15.1228	13.9725	14.4454	11.1533
12q24.11	NM_032829	84915	FAM222A	family with sequence similarity 222, member A	0.711926	-0.4902	0.00228013	0.142384	1.96296	2.16363	2.05316	4.28061	4.07679	3.34248	2.26848	2.32726	2.28088	0.94365	1.10241	1.51923	1.65906	2.38896	2.12902	3.74698	2.64701	3.23411	3.93747	3.61561	5.36285	6.11732	5.63372	6.81135	3.20751	3.02536	2.32268	1.73589	2.61915	3.32475	4.53773	4.15693	2.70126	2.97256	2.74929	3.64019	2.9949	3.53829	2.55572	3.65884	3.86864
9q34.11	NM_020960	57720	GPR107	G protein-coupled receptor 107	1.20612	0.270374	0.00228317	0.142384	9.4162	10.2327	5.23677	7.74961	9.33731	9.3367	9.98976	9.8834	8.88333	10.2439	10.4039	8.96844	6.51144	6.50205	5.22569	7.74275	9.54636	10.2416	8.73842	8.18707	9.1355	5.94278	7.73778	6.00221	6.66749	3.45639	5.84527	10.1369	8.15539	9.65469	3.4626	2.86113	6.05251	8.77688	10.2287	8.23296	9.49175	8.17399	9.94172	3.42952	6.69555
17q21.31	NM_006688	10882	C1QL1	complement component 1, q subcomponent-like 1	0.656052	-0.608118	0.00230227	0.142684	0.988562	1.27491	1.332	2.33451	3.90142	3.32174	2.58259	2.08259	2.08485	3.70707	2.37773	3.2987	2.58722	4.25874	3.27163	5.70137	3.02676	2.87773	2.0071	2.10218	3.22947	17.3253	12.1418	15.1717	2.67964	2.59568	2.05578	4.421	3.93555	7.07307	3.96729	4.35559	2.11563	4.2765	4.45299	3.34579	4.3448	4.92362	4.06199	2.80966	1.81717
1q23.1	NM_006617	10763	NES	nestin	0.772442	-0.372501	0.00235986	0.14535	28.4464	27.6124	18.1098	27.9857	23.7995	29.0415	15.7014	13.4366	16.445	5.86594	7.98625	7.12318	15.01	19.5168	16.5432	21.5223	58.1978	30.9788	38.5298	36.5676	38.2845	23.2805	21.6165	20.3208	53.0615	55.5505	33.9848	25.3063	16.9287	21.9703	15.0585	15.642	21.641	20.1657	21.0937	18.3268	17.2301	18.9223	23.6771	19.013	16.6811
8q23	NM_012082	23414	ZFPM2	zinc finger protein, FOG family member 2	1.60664	0.684048	0.00242585	0.146957	12.1935	8.1353	7.08402	3.36342	3.30713	3.63524	5.84047	3.89697	4.10504	10.5377	11.9432	9.1125	9.83976	8.15455	9.21965	5.59548	3.17605	5.05516	2.51448	2.31037	2.36756	4.10728	3.82293	4.5766	2.77597	2.66336	3.9656	4.93078	4.93695	4.53231	1.23086	1.43409	2.60839	5.04398	5.85363	5.38542	4.83488	4.65551	5.63039	1.43373	1.17489
Xq22.1	NM_021992	11013	TMSB15A	thymosin beta 15a	0.744968	-0.424749	0.00243806	0.146957	106.545	87.9609	139.581	100.555	92.787	87.1645	50.0317	34.4993	41.0537	5.02955	10.3145	10.5345	91.1538	81.2119	91.1755	67.6214	139.188	68.1909	122.225	107.784	101.382	57.0488	47.5539	49.4876	81.373	122.505	89.099	59.2328	64.7632	60.0958	53.9307	54.8798	25.8879	65.6973	83.9084	78.2848	37.8721	68.2834	64.984	50.458	53.5105
21q22.12-q22.13	NM_005441	8208	CHAF1B	chromatin assembly factor 1, subunit B (p60)	1.25925	0.332566	0.00246045	0.146957	3.45856	2.88628	3.1779	3.53883	2.79296	3.37291	3.40319	3.37239	3.08001	3.57937	4.1272	3.05816	3.37746	4.42215	2.66601	4.52684	5.39389	3.75	2.26948	2.49117	1.92612	2.70527	2.30378	1.98759	2.54223	1.96525	2.15861	2.76484	2.56785	2.81806	0.96027	1.22861	2.37088	3.10141	2.91373	2.56069	3.49511	2.42043	2.73568	1.93681	1.59775
14q13.2	NM_003136	6729	SRP54	signal recognition particle 54kDa	1.1843	0.244032	0.0024689	0.146957	25.5865	22.3243	29.423	22.822	31.4653	22.3686	23.7998	22.3685	24.554	22.0391	29.459	23.0165	31.238	26.0142	18.8147	25.032	31.1473	30.7392	16.5857	17.3969	18.9399	14.1322	15.7625	15.7021	12.0164	8.29763	16.2217	20.9391	19.009	20.1233	5.63203	5.37422	5.12066	22.2666	22.2657	20.381	23.2108	19.8729	26.2683	15.5107	15.8127
2p25.2	NM_003108	6664	SOX11	SRY (sex determining region Y)-box 11	0.634041	-0.657351	0.00246978	0.146957	28.9294	22.0997	14.2676	19.3532	16.5128	21.2101	20.7689	14.4229	16.2333	1.11587	1.60268	1.68989	20.9112	23.9296	23.4505	13.9643	25.994	14.5299	40.5001	39.8802	41.0885	13.638	13.6123	11.4841	11.0744	12.3129	11.3607	25.7174	21.4846	24.8791	11.2713	10.1719	16.6387	20.5802	25.1483	23.9767	9.55848	15.1239	17.441	15.9488	18.0447
4q32.3	NM_001873	1363	CPE	carboxypeptidase E	0.903995	-0.145613	0.00247939	0.146957	98.028	67.4231	67.4486	54.4658	58.1829	61.1945	61.3701	63.4042	59.1177	38.0853	46.315	42.7258	60.4131	71.2062	66.1547	55.3594	66.4241	66.0231	152.341	143.074	126.014	76.0054	80.5216	86.4045	60.3777	74.904	87.0119	83.8637	63.0639	69.7113	45.757	38.6898	99.3643	54.5012	65.915	49.2634	65.3644	73.6437	72.1588	80.9327	60.5232
16p11.2	NM_031478	83723	FAM57B	family with sequence similarity 57, member B	0.626007	-0.675748	0.00250314	0.146957	8.4807	8.29739	7.18543	9.7669	7.6609	9.15801	4.67929	2.71744	3.40603	0.297337	0.661101	1.02312	5.5363	5.50597	6.13667	4.09178	5.55483	3.83949	10.645	10.7558	14.4813	6.91153	6.21424	6.85769	8.82483	11.1632	7.96642	4.25591	7.02205	9.42058	10.5227	9.71826	3.51563	6.71014	6.50791	7.71413	5.67756	10.9403	7.70059	4.66519	6.82841
19p13.3	NM_203304	399664	MEX3D	mex-3 RNA binding family member D	0.833486	-0.262769	0.00254432	0.146957	10.7319	10.4721	11.9384	8.35042	10.8346	11.7946	6.53982	8.35525	6.98937	5.73241	6.53848	6.79032	12.6095	11.3061	10.1721	13.72	10.2006	10.1142	11.4216	10.6644	13.1819	9.14665	8.25325	10.3551	8.29917	10.811	7.3174	10.7674	11.932	16.6963	15.0802	14.7111	7.48927	11.1013	11.7895	10.4609	9.32809	8.43456	9.52496	7.98117	7.53123
15q14	NM_153613	254531	LPCAT4	lysophosphatidylcholine acyltransferase 4	0.816305	-0.29282	0.00254544	0.146957	8.7672	8.72561	7.11267	9.0515	9.65445	8.67943	6.04011	5.46901	5.52193	5.23611	4.28083	6.11848	8.01903	9.82338	10.3165	5.52133	5.72051	5.48872	12.2248	14.3726	13.4471	11.7367	9.43136	11.3585	9.31111	6.11433	8.51962	6.91839	7.60221	8.93187	13.5553	11.9928	7.3335	10.4278	8.68116	10.2541	7.49164	6.99113	6.59062	9.73533	11.745
3q24	NM_004267	9435	CHST2	carbohydrate (N-acetylglucosamine-6-O) sulfotransferase 2	0.784639	-0.3499	0.00255932	0.146957	3.55447	3.72319	4.39189	4.44052	3.4342	2.99098	2.74326	3.24553	2.58135	2.97667	2.79549	3.64866	4.93587	3.79061	4.44956	2.38216	3.73736	2.80144	5.33258	5.05264	6.71379	6.26714	4.82813	6.20375	4.95275	5.67637	4.54347	3.24303	3.4384	3.70694	5.54608	4.90324	2.34769	5.01648	4.45325	5.04167	4.35456	4.52624	4.85031	3.43623	3.35025
1p13.3	NM_002790	5686	PSMA5	proteasome (prosome, macropain) subunit, alpha type, 5	1.10546	0.144646	0.00256655	0.146957	11.7244	9.54244	13.6862	15.4871	15.9792	14.9591	14.5763	15.2429	17.634	11.7806	12.5468	11.8944	14.0999	17.7258	15.0298	9.3544	17.7431	13.742	11.7195	11.4284	9.72053	8.24885	8.44363	8.17867	8.82092	12.0387	10.1804	11.1899	9.70163	10.4137	6.55772	6.27414	7.86407	12.4255	14.1577	12.1445	12.3973	12.5822	12.4792	12.154	10.0173
7q36.3	NR_026865	129790	C7orf13	chromosome 7 open reading frame 13	1.46716	0.553028	0.0025704	0.146957	3.03591	3.52143	3.09844	3.02301	3.01641	2.88929	3.25387	2.54898	3.1907	2.02698	2.49317	2.39157	4.43593	4.05713	5.18768	2.84156	3.59695	2.66594	1.54657	1.9629	2.00946	1.45982	1.11492	1.32786	2.31264	1.89764	1.84549	1.86729	1.59392	2.24912	1.60321	1.71859	0.786579	2.61912	3.20003	3.05244	1.52192	1.08903	0.688914	1.10607	1.39146
1q22	NM_001294338	1196	CLK2	dual specificity protein kinase CLK2 isoform 1	0.870378	-0.200286	0.00259314	0.146957	5.33884	5.62262	3.08316	5.37306	4.531	5.85147	3.78954	4.70289	6.72924	6.66278	4.8493	6.87599	6.66711	5.68366	6.75411	6.02492	7.45627	5.8909	5.65708	5.72637	5.07737	9.07285	8.2961	7.63009	6.25992	4.76234	5.36728	7.03493	4.79622	6.6185	5.6137	4.34492	5.71348	5.08124	7.70107	6.26458	5.8045	4.88641	6.72087	5.7942	6.27442
9q31.1	NM_003692	8577	TMEFF1	transmembrane protein with EGF-like and two follistatin-like domains 1	0.661655	-0.595849	0.00260144	0.146957	23.1754	16.46	13.1098	17.6233	13.5284	15.5307	12.5979	8.93525	9.02395	1.27352	2.22351	1.91462	9.83055	11.8755	10.731	17.2374	19.4188	17.574	32.4879	26.3582	30.1114	17.6217	23.0177	19.8159	10.2874	8.86031	12.8432	17.2907	12.9678	18.1064	4.20369	4.30393	7.56809	14.1219	15.3781	12.7101	8.9323	16.8597	21.5424	15.2609	12.925
3q25.1	NM_014445	27230	SERP1	stress-associated endoplasmic reticulum protein 1	1.09045	0.124922	0.00260687	0.146957	29.8742	24.2027	30.6759	36.3223	42.2573	42.5725	40.5218	41.4552	44.8351	46.3123	47.2439	49.2778	44.5762	58.4378	49.8053	38.4636	44.0658	33.1467	22.8128	21.6967	20.0807	27.7397	27.5866	31.6843	20.9928	28.9623	31.8022	34.9639	31.0371	29.7538	16.1492	15.5398	27.0248	35.0931	35.3783	31.6804	38.1467	32.2302	40.4227	31.3733	19.6116
14q32.33	NM_001823	1152	CKB	creatine kinase, brain	0.845882	-0.241472	0.0026238	0.14708	188.034	208.748	175.893	130.32	105.305	119.433	87.3207	75.1999	97.9195	19.1345	20.0277	28.9446	137.92	148.234	145.244	93.8477	196.057	98.5942	103.914	93.2556	108.241	207.345	167.934	187.39	112.437	131.056	99.0663	83.0174	83.4359	139.798	111.947	98.8098	48.5478	118.136	125.158	136.713	78.7016	107.273	96.9791	93.6929	90.4598
14q13.1	NM_022073	112399	EGLN3	egl-9 family hypoxia-inducible factor 3	1.27554	0.351114	0.00267054	0.148864	4.5873	5.93105	5.84849	9.51933	8.42808	9.12444	11.6388	9.67144	12.4558	4.18593	6.09627	4.33687	6.13455	8.23422	7.57917	3.06221	4.46177	4.96887	7.94496	7.07292	6.62173	3.12672	2.77885	3.17423	5.49431	6.77002	6.22684	6.65173	4.9306	4.74747	3.25388	2.71944	4.22311	5.65349	5.33768	4.67797	6.89034	5.34917	5.8353	6.61916	5.16103
Xq27.1	NM_004065	1038	CDR1	cerebellar degeneration-related protein 1, 34kDa	0.873289	-0.195469	0.00268859	0.149037	51.2306	107.44	97.6379	101.411	75.6767	93.0194	101.683	66.5485	78.4427	50.7769	59.3332	51.3603	92.0797	55.231	73.5957	88.8718	40.0202	55.4089	91.723	89.9583	151.1	90.1022	105.323	134.252	120.599	160.022	167.36	52.8046	79.556	85.729	224.947	152.92	136.315	134.244	120.221	151.363	124.188	230.663	212.774	142.824	213.296
1p13.3	NM_001408	1952	CELSR2	cadherin, EGF LAG seven-pass G-type receptor 2	0.699127	-0.516373	0.00272625	0.15029	10.6043	13.8344	7.54974	16.1415	9.36592	12.3648	8.09496	6.41864	7.61983	1.70162	2.28277	2.35058	8.04201	8.59244	8.88586	8.41821	10.5933	6.60103	9.25839	9.4815	10.8575	10.6333	8.95216	8.51956	18.4141	14.7265	12.8563	6.06424	7.83581	10.8763	18.2844	15.7128	9.22271	10.6114	12.4543	15.1608	8.56249	13.5154	9.73409	8.40869	12.7805
18q21.31	NM_015277	23327	NEDD4L	neural precursor cell expressed, developmentally down-regulated 4-like, E3 ubiquitin protein ligase	0.654163	-0.612279	0.00275876	0.151143	8.48012	4.6533	5.09869	5.78075	4.01979	5.65194	3.23435	2.69706	2.0749	1.46156	0.779326	0.636092	4.97584	6.13496	4.68462	6.89193	6.66123	4.17276	11.1888	9.42863	12.7687	4.72985	3.93244	4.1047	5.51407	4.50496	5.31784	6.64497	5.81021	7.19925	3.07785	2.00924	3.43516	3.82561	5.23829	6.76133	3.17907	6.13014	2.77191	2.67457	5.73577
5q34	NM_002887	5917	RARS	arginyl-tRNA synthetase	1.12927	0.175397	0.00277748	0.151143	32.3468	26.0301	35.2561	27.8797	40.0765	34.1183	35.7793	39.3275	35.9532	50.6399	66.9124	52.7526	46.6251	46.6069	35.5926	49.7429	41.8046	42.0666	23.1553	20.3506	21.0072	32.7189	32.3362	36.1149	18.9759	18.6322	21.4039	37.8278	34.7328	32.673	12.8754	12.8763	16.9007	31.6173	32.4291	26.3823	38.3141	36.6522	41.5197	22.5834	20.0867
17q22	NM_080416	5414	SEPT4	septin 4	0.638837	-0.64648	0.00280101	0.151143	5.07982	4.17943	2.8187	2.41547	3.03952	2.50582	1.56798	1.49174	2.30362	0.641219	0.001717	1.33495	3.74253	6.05958	5.95492	3.76165	4.96698	4.29675	7.23459	7.3566	5.89213	11.9001	9.07559	9.2348	3.96922	1.7227	3.46464	3.36631	2.03694	2.61838	2.27568	1.4876	1.76911	3.05643	4.92975	2.55818	1.71293	2.79452	2.28164	2.70524	3.82264
13q12.11	NM_005870	10284	SAP18	Sin3A-associated protein, 18kDa	1.07652	0.106372	0.00280231	0.151143	28.0492	21.6861	27.8583	31.0536	34.8177	30.537	33.6827	36.8162	35.1191	31.2728	35.0864	32.6699	32.5662	37.4831	27.3937	34.0854	33.7394	34.9335	21.1661	20.7311	21.2452	30.8068	27.4028	31.6358	15.6108	18.4637	21.2002	28.6581	26.2885	27.9955	12.9991	11.8642	17.0272	26.0674	24.9344	22.2786	30.978	27.6971	29.2944	32.9649	24.4362
1p36.11	NM_205861	79947	DHDDS	dehydrodolichyl diphosphate synthase	1.1964	0.2587	0.00286696	0.153378	5.81425	5.46767	3.50741	6.23302	5.96455	6.01105	7.43796	7.88681	9.2728	5.70024	6.7777	6.59055	5.80496	5.09692	6.78064	5.96162	8.29468	4.22175	5.76851	6.24458	6.48852	4.78588	4.81093	3.26567	5.53996	4.27902	3.41191	6.19539	5.43398	5.85252	3.59551	4.71665	4.45912	5.39441	6.02748	5.49273	5.00524	3.56796	3.99238	3.94724	4.43217
7q22.1	NM_152742	221914	GPC2	glypican 2	0.641182	-0.641195	0.00287448	0.153378	22.224	21.8785	18.9778	21.9071	19.375	22.9209	14.1739	10.4447	12.89	0.937288	1.55566	2.40702	11.4162	10.6815	11.9329	11.7387	23.4923	11.0822	32.2121	33.8049	40.4875	12.7523	10.4399	11.1136	24.6896	26.3379	20.0026	15.9378	18.8645	25.9516	23.7435	20.7967	11.0238	19.3072	20.5283	20.1328	12.7111	23.2264	17.2866	14.9216	15.4089
1p34.2	NM_014747	9783	RIMS3	regulating synaptic membrane exocytosis 3	0.72832	-0.457355	0.00294686	0.155701	11.2311	12.1625	10.1402	15.376	14.6172	15.0135	9.00606	6.96463	7.20822	1.92476	2.83044	2.59932	6.78636	6.98242	7.39046	8.25272	12.3105	8.81592	16.2291	16.318	16.7918	15.1949	11.8936	12.8627	12.3594	10.7976	11.1232	9.23259	11.8723	12.9354	12.8714	13.3181	8.85274	12.3404	12.2288	12.4744	10.9474	12.6777	13.1936	8.12567	10.2368
17p11.2	NR_027166	125144	FAM211A-AS1	FAM211A antisense RNA 1	1.05109	0.0718848	0.0029651	0.155701	343.686	268.319	325.124	265.485	335.419	308.51	440.714	477.595	429.649	457.173	481.735	479.669	366.909	393.993	358.066	303.811	343.782	274.952	245.982	208.252	199.389	320.023	263.788	294.371	216.923	308.89	250.793	406.624	412.962	338.959	207.507	213.734	178.261	370.148	355.818	310.553	337.832	330.632	278.486	208.962	166.934
11q23.2	NM_000615	4684	NCAM1	neural cell adhesion molecule 1	0.814736	-0.295595	0.00296889	0.155701	32.4976	32.5392	13.576	24.1377	22.4202	28.5825	16.4219	12.2972	11.2337	10.6469	11.2874	9.60798	20.2541	27.7889	21.8607	24.7767	25.1693	21.7975	46.1086	45.132	48.3747	26.8686	23.9277	22.229	26.0526	23.2353	28.4783	29.614	23.8462	26.9193	12.3811	11.3333	17.4427	17.7906	21.0547	19.7896	20.7394	27.9049	28.7542	16.5597	22.6383
8q21.3	NM_003909	8895	CPNE3	copine III	1.10883	0.14904	0.00298045	0.155701	16.8175	9.65437	13.2316	14.7917	16.0015	15.0733	19.0157	18.2502	17.9441	17.1862	21.259	17.2193	17.1163	16.9249	14.304	18.4584	15.2649	19.597	8.16893	8.01942	7.4114	12.7686	14.4803	14.4582	8.63346	9.46692	12.0361	15.4026	13.501	13.9328	9.00123	7.25892	11.6622	14.2025	15.6797	13.4561	17.718	16.1612	19.0943	14.4844	12.2392
17q21.2	NM_000421	3858	KRT10	keratin 10	1.34822	0.431055	0.00302183	0.156653	3.8818	3.52032	4.44161	5.03952	5.85116	4.70429	4.50196	5.5079	5.1454	4.49091	4.90229	5.0128	6.18557	4.89129	4.96958	2.91823	4.73326	3.15418	1.66322	1.73305	1.8875	3.55812	2.80506	3.64281	2.07706	2.63664	2.57654	2.72189	3.90126	4.43926	5.40355	4.08642	2.14705	3.89787	4.27469	3.82427	4.80947	3.83182	3.42122	2.31043	2.3246
12q24.13	NM_138341	89894	TMEM116	transmembrane protein 116	0.763325	-0.38963	0.00304749	0.156653	4.93563	5.46248	5.11566	3.25536	1.30465	4.23105	3.36781	3.53524	4.62687	3.15728	4.35134	5.39338	4.26243	6.41633	6.98889	7.47927	4.63784	3.76604	8.28175	8.45428	5.95888	4.08576	4.86722	5.11609	3.75989	4.29699	6.22141	6.28785	4.66551	6.53228	3.0266	3.45033	6.25899	3.45262	4.23331	3.33572	2.93741	4.63661	4.88417	8.53157	7.87694
20q13.13	NM_002237	3755	KCNG1	potassium voltage-gated channel, subfamily G, member 1	1.45914	0.54512	0.00307863	0.156653	10.204	11.0134	10.34	6.24839	4.52346	5.60234	7.35933	6.41593	8.43731	5.20534	3.68107	3.99448	9.77777	8.66564	10.0764	1.00544	2.33027	1.65337	3.61762	3.58762	4.20129	2.88339	2.10895	3.10895	5.28629	4.58601	4.26996	3.27607	4.11861	5.27832	2.9633	3.17647	1.90729	5.48647	6.53727	6.27904	7.3511	6.78679	5.28881	3.5925	2.97896
12p11.22	NM_020782	57542	KLHL42	kelch-like family member 42	0.874028	-0.194248	0.0031076	0.156653	5.63175	4.27799	3.40178	6.217	5.98981	6.26056	5.1443	4.63919	4.82019	4.59308	5.85444	4.73967	5.12375	5.73288	4.58282	6.85805	6.9781	5.73222	10.2928	10.1386	9.25921	6.60895	7.22733	7.18827	5.95982	5.19605	6.38019	6.914	6.26766	6.8285	3.44418	3.05802	5.81691	4.61975	5.27548	5.0456	6.25372	6.10973	6.57106	5.57133	5.15288
11q12.2	NM_021727	3995	FADS3	fatty acid desaturase 3	0.748932	-0.417093	0.00312099	0.156653	6.14307	7.36647	6.64517	4.80805	5.86163	3.62285	2.67622	3.64999	3.01601	1.8415	1.91973	2.95953	6.64087	6.31562	5.56117	3.97422	6.26295	4.44664	9.90233	9.72743	10.4794	5.11865	4.17037	6.36294	7.83848	5.28866	6.2468	5.45179	5.09159	6.76654	7.99843	7.53801	4.14213	5.3988	5.64151	6.30047	4.09091	4.60122	3.0353	3.25361	3.79144
16q21	NM_001242836	65009	NDRG4	NDRG family member 4	0.665885	-0.586655	0.00313807	0.156653	30.9476	27.9155	30.2412	26.7039	28.4858	23.7083	11.0669	9.81955	10.8357	1.41514	3.4207	3.1067	18.5319	20.1716	21.9666	12.1119	27.7875	12.5161	64.4601	67.9619	65.6628	18.2456	14.4997	15.6711	36.9079	41.9906	38.9316	15.363	16.3858	20.6536	18.7117	18.3213	11.65	18.6787	18.8209	18.0977	16.9062	22.5553	17.203	21.6548	22.1397
1q23.3	NM_012475	27005	USP21	ubiquitin specific peptidase 21	0.805152	-0.312667	0.00313906	0.156653	4.51997	3.7553	4.57859	4.76369	3.57572	2.08176	2.20224	3.69808	4.01986	5.5328	3.56296	4.79197	3.75381	3.27946	2.98894	4.71295	3.80951	2.74326	5.32489	6.13844	6.32578	6.78573	3.47328	6.48857	4.60013	4.20494	4.30213	4.35115	3.28597	6.43619	5.07396	6.36314	4.14473	5.82956	5.22844	5.84068	5.07332	5.93571	4.50036	4.73804	5.00664
9q21.12	NM_015110	23137	SMC5	structural maintenance of chromosomes 5	1.14769	0.198735	0.00314445	0.156653	6.46256	4.64921	4.43161	6.30892	6.80929	6.19327	7.6615	7.92394	7.97818	7.41722	9.31363	6.55181	6.21693	5.30192	4.44025	8.4103	6.925	9.27553	3.88307	4.34708	5.15862	4.70932	5.52711	5.15277	4.53105	3.54142	5.5795	6.81395	6.19852	6.12355	3.13535	2.95954	2.85047	6.46056	6.86954	6.54809	7.49702	5.75534	8.58637	6.04322	6.57483
1q22	NM_001105203	23623	RUSC1	RUN and SH3 domain containing 1	0.710719	-0.492649	0.00319268	0.156653	9.2611	9.13866	6.7248	8.77868	8.43661	8.59612	5.68287	4.20131	4.35364	1.4565	1.6781	2.13402	5.61594	5.45028	8.24868	7.76614	7.23793	4.86682	13.8074	13.0241	16.0382	5.60243	5.15152	5.63433	9.30694	9.57368	9.30174	6.07636	6.45533	9.57107	12.7307	12.5597	6.36356	8.63339	7.64877	6.65426	6.76105	8.15893	6.00247	6.53973	7.02086
4q32.2	NM_018352	55319	TMA16	translation machinery associated 16 homolog (S. cerevisiae)	1.2081	0.272738	0.00321403	0.156653	5.21296	2.99175	4.64974	4.83585	6.26832	6.06438	5.19858	5.04082	5.45273	5.20635	7.16121	5.411	7.72165	7.08739	4.22588	6.11016	6.01303	6.42674	3.42708	2.70298	2.68531	4.28287	5.42781	4.26798	3.26177	2.96911	3.60193	5.62815	4.06246	4.16794	2.05347	1.44056	3.51763	4.56096	4.57328	2.90791	5.94414	3.59558	7.06951	4.24697	2.88943
5q15	NM_005654	7025	NR2F1	nuclear receptor subfamily 2, group F, member 1	0.720607	-0.472715	0.00321453	0.156653	23.5166	25.6128	21.4029	27.2532	17.7565	21.3939	18.5142	13.8281	18.4111	4.36502	5.61209	4.89136	8.69149	7.1193	10.3171	19.9127	39.996	16.0669	56.3965	54.7008	60.9765	27.7558	23.172	25.6492	47.5345	48.1183	44.2527	15.7888	15.4887	22.8204	44.3642	40.3093	25.985	22.4226	23.5672	23.7131	16.5721	23.5413	23.2228	16.6304	21.4412
1p22.3	NM_001166293	117178	SSX2IP	synovial sarcoma, X breakpoint 2 interacting protein	1.36346	0.447275	0.00321589	0.156653	3.62445	2.33768	2.79248	4.10855	1.96101	2.65376	4.30826	3.58707	2.92091	3.09317	3.4282	3.22477	3.79041	3.58081	2.75896	1.93078	2.87579	3.86875	2.63938	1.87383	1.85187	2.03178	2.55401	2.07503	1.65064	0.9469	2.9501	3.43945	2.29833	2.79678	1.37053	0.754532	0.78268	2.86924	3.09515	2.1052	2.54496	3.92854	1.89567	1.26496	1.79593
3p14.1	NM_001164796	115286	SLC25A26	solute carrier family 25 (S-adenosylmethionine carrier), member 26	1.31631	0.396503	0.00321771	0.156653	3.40679	3.60211	4.83803	3.58819	3.78861	3.51848	3.49858	4.40961	2.68329	3.75023	3.47398	4.64925	3.46162	3.31122	4.01829	1.50913	2.98257	2.89543	2.12307	2.04407	2.17049	2.32845	3.05305	2.97613	2.48555	2.36286	3.04908	3.27615	3.33455	3.3484	3.44611	3.69379	1.82812	3.89883	3.95088	3.91805	3.24984	1.87737	3.37773	2.68746	2.04355
10q11.22	NM_002750	5599	MAPK8	mitogen-activated protein kinase 8	0.581226	-0.78283	0.00321847	0.156653	6.63345	5.49252	5.15321	6.18644	4.49273	7.77497	3.15514	0.829583	1.833	5e-06	0.291488	0.000141	6.42399	6.93806	4.46477	4.58674	6.87156	4.61556	14.6711	15.0917	12.2212	2.23279	3.52018	3.3009	4.8962	6.01907	7.03692	5.01203	3.37101	5.07066	1.74899	1.89888	2.63862	4.49745	4.47051	2.4433	3.66005	6.70795	7.26248	3.74968	3.86847
22q12.1	NM_005080	7494	XBP1	X-box binding protein 1	1.08896	0.122946	0.00323882	0.156878	29.5919	30.4509	38.6167	48.5954	56.0538	52.8642	54.0054	54.9361	56.6765	70.4975	77.685	75.6719	67.4704	62.9692	50.4782	47.9138	52.311	41.9162	24.091	21.1738	20.4816	45.2885	34.1048	49.5029	30.0229	31.3582	32.0907	54.6522	55.4568	50.6656	22.6358	27.0024	33.2771	44.711	46.4103	43.0311	56.1453	37.6998	45.2525	41.217	29.0284
2q24.2	NM_012198	25801	GCA	grancalcin, EF-hand calcium binding protein	1.28617	0.363084	0.00327256	0.157747	6.92022	4.57231	6.07856	4.74	5.81202	6.32758	6.59836	6.7709	7.56634	8.40678	9.76187	9.1649	13.1453	12.2625	11.1982	4.76244	6.84437	6.12394	4.0965	3.75919	3.04825	4.48322	5.37509	5.60631	3.53439	4.54416	6.21991	6.69937	5.60777	4.99551	2.20595	1.90605	4.13908	5.53653	6.3179	4.81488	5.13339	4.44943	5.67654	3.51354	2.50176
22q11.21	NM_022044	23753	SDF2L1	stromal cell-derived factor 2-like 1	1.36922	0.453357	0.00331178	0.15887	3.57711	3.30614	4.02915	7.18548	8.56557	7.62351	8.00832	8.54458	9.66073	8.04879	5.31781	6.90038	5.67864	7.04122	3.74597	4.06285	5.83478	5.69873	1.2797	1.66664	1.99752	3.77786	2.38982	2.18958	3.40536	1.30266	2.5416	4.28139	6.67128	6.18449	5.97326	4.62202	3.61247	5.03544	5.38477	4.25344	7.51449	5.29556	4.48672	6.10988	4.60379
13q33.3	NM_004093	1948	EFNB2	ephrin-B2	1.28897	0.366214	0.00333981	0.159448	22.4942	15.9121	9.45235	20.4148	21.5451	31.6069	23.526	24.99	22.5535	54.76	49.8642	48.707	33.2762	45.4839	33.2944	33.7714	13.0242	20.8749	15.0198	15.478	13.9596	13.2627	15.046	14.414	10.9096	7.35655	8.63303	30.6445	27.5648	23.7331	5.26469	6.91178	13.984	16.3243	17.828	13.9912	32.5094	17.6673	22.6364	11.1646	6.82931
19p13.3	NM_017797	55643	BTBD2	BTB (POZ) domain containing 2	0.937856	-0.0925615	0.00336175	0.159731	33.0027	33.959	35.7907	38.7506	38.2643	34.5137	32.6948	36.4933	37.0483	30.5672	28.3582	32.4575	32.6005	38.1216	36.7132	35.8215	31.4835	32.5151	30.8363	30.4023	38.2306	44.7001	34.2668	44.6094	30.2833	33.207	27.3205	33.3943	38.4048	47.5632	55.1992	50.3033	25.8087	41.17	38.1459	41.4301	40.322	43.4576	35.2408	37.2049	34.1067
13q32.1	NM_198968	22873	DZIP1	DAZ interacting zinc finger protein 1	0.885811	-0.174929	0.00348387	0.164006	4.61723	3.4787	3.18077	4.69858	4.92704	4.52764	4.31113	4.27165	4.05752	4.30079	5.02417	4.99881	4.09125	3.4826	3.52847	6.29475	4.1648	5.64403	6.40156	7.09069	6.5626	6.09191	6.42075	6.64931	4.69426	3.39405	5.66682	6.84567	5.08249	5.24651	2.9113	2.70838	4.39906	5.40674	4.7448	5.24477	5.25535	5.11417	5.76975	5.31833	4.61481
9q22.31	NR_003704	100124534	SNORA84	small nucleolar RNA, H/ACA box 84	1.09204	0.127024	0.00349424	0.164006	175.802	273.351	259.37	403.117	396.344	304.56	405.656	373.298	395.693	200.889	170.154	238.977	156.524	278.279	257.673	83.0026	447.783	205.57	150.962	167.648	139.742	139.073	43.1334	92.1315	203.708	129.285	165.863	441.701	443.109	397.102	118.988	161.778	120.637	194.705	285.967	218.32	228.319	131.393	98.4326	151.333	75.4004
10q24.31	NR_026762	90271	LINC00263	long intergenic non-protein coding RNA 263	0.768491	-0.379899	0.00350103	0.164006	5.17819	5.78459	4.55283	7.76507	6.39446	6.78728	8.14148	6.59802	5.97269	4.02343	4.70651	4.15466	5.8772	8.15831	9.14612	11.2937	9.51424	11.2682	4.88263	5.00152	4.03886	18.956	15.2849	16.3515	4.47521	5.31963	6.2238	6.16474	5.03723	6.7619	9.3119	7.88993	7.55233	7.05165	6.63814	7.3314	6.63753	6.3468	6.64852	8.83966	9.66425
4q28.2	NM_006320	10424	PGRMC2	progesterone receptor membrane component 2	1.17002	0.22653	0.00352587	0.164083	6.89264	5.13021	4.48931	8.23281	8.20148	9.45918	10.3306	9.96995	9.64023	13.657	15.342	13.5367	9.51409	9.24331	8.94682	5.26533	9.19681	7.19773	4.28088	4.88177	5.28303	7.11375	7.09036	7.78208	5.68147	8.63409	8.17743	7.6254	8.59782	7.90658	3.50827	3.70393	5.88942	9.49883	8.70372	7.76488	8.8865	8.42553	10.7041	6.54609	5.33127
7q22.3	NM_021930	60561	RINT1	RAD50 interactor 1	1.13811	0.186638	0.00353556	0.164083	6.23233	4.85934	4.61369	5.09601	6.81801	5.2848	6.45496	5.78423	6.81462	5.78248	6.58711	6.06517	5.76483	6.39464	3.94304	7.42816	5.84574	6.51049	5.8048	4.99766	4.92432	4.11967	5.0082	5.52931	3.35313	2.60527	4.70742	5.84589	5.02487	5.89789	2.33105	2.14943	3.95637	6.1857	5.59248	5.17388	6.64407	5.59117	7.49291	5.0667	4.15048
22q13.31	NM_001135862	112885	PHF21B	PHD finger protein 21B	0.675844	-0.565239	0.0035691	0.164429	7.91442	8.57185	3.11571	8.57084	6.89306	10.1692	3.91904	2.47407	2.7494	0.703749	0.699407	0.831899	5.42318	5.24274	6.93901	6.10414	9.00648	2.55092	5.07533	7.1084	5.97136	7.08267	5.16812	6.51992	9.49899	7.57022	7.41837	5.37355	5.4427	6.67998	5.46382	4.13908	4.02462	6.08982	6.94217	6.76649	4.87064	5.04709	4.97181	4.92716	5.67494
11p14.2	NM_178498	159963	SLC5A12	solute carrier family 5 (sodium/monocarboxylate cotransporter), member 12	1.74029	0.799328	0.00357598	0.164429	0.083427	0.043215	0.079026	2.31706	2.5098	4.47232	2.1269	1.31567	1.83877	10.1344	12.1821	11.1583	3.08874	1.95007	1.55057	0.285841	0.168906	0.61938	0.035503	0.064937	0.048422	1.82412	1.71853	1.65511	0.694127	0.673798	1.16525	1.33597	1.4188	1.15385	0.07542	0.196455	0.59175	4.46525	2.95818	3.1037	3.08046	1.93942	2.79957	0.287332	0.086758
4p16.2	NM_001313	1400	CRMP1	collapsin response mediator protein 1	0.73326	-0.447604	0.00363117	0.165716	105.579	102.711	56.8738	89.9645	73.1353	94.3699	47.9986	33.7447	38.3119	4.77032	6.34211	8.33378	63.3522	72.3455	81.7135	46.0551	78.227	32.1619	155.027	158.005	162.398	48.7814	38.4686	39.7615	89.7368	78.3602	75.0868	56.0737	54.3716	58.5828	48.2452	51.9628	36.6504	47.6451	64.0322	51.9643	46.1506	73.1854	51.2047	50.9419	72.2366
1q22	NM_001242824	2224	FDPS	farnesyl diphosphate synthase	0.891424	-0.165816	0.00364836	0.165716	29.0889	30.9253	29.2249	25.984	30.8382	23.4492	23.6329	20.2573	27.3615	18.3525	17.7705	18.8012	24.2401	25.6712	30.3454	35.8847	49.5694	23.9785	34.9057	32.6302	33.6379	37.2441	29.5661	29.2984	15.5634	21.0041	25.2563	21.1472	28.7596	28.0509	27.4957	32.6386	16.5319	30.6591	33.7295	34.2776	25.8355	30.358	23.4447	26.2454	32.0724
1q21.3	NM_030913	10500	SEMA6C	sema domain, transmembrane domain (TM), and cytoplasmic domain, (semaphorin) 6C	0.727488	-0.459005	0.00369649	0.165716	5.2729	6.45094	4.87499	7.83641	7.05664	7.497	3.85814	3.13949	4.31877	1.73665	1.71755	2.1999	3.30024	3.82925	4.19375	5.79786	4.27371	3.87697	7.47355	7.94586	9.40481	4.64534	3.95787	4.59227	7.7503	7.64481	6.71393	5.26576	5.95909	7.88958	10.5003	10.8911	5.4074	7.15932	6.94553	7.27366	5.07117	7.26269	5.80666	5.91538	7.31059
12q13.2	NM_006741	5502	PPP1R1A	protein phosphatase 1, regulatory (inhibitor) subunit 1A	0.662339	-0.594359	0.0037355	0.165716	10.9807	11.8202	13.2117	13.0484	12.8277	12.3054	5.39113	4.90816	4.65207	0.898215	1.87267	1.90429	5.77319	6.1609	7.54903	7.39489	11.1613	7.2789	25.4038	24.9445	23.8825	14.3193	11.883	11.8962	13.0787	22.0107	15.375	6.85034	7.20489	9.46266	11.8411	14.3291	6.77283	8.03336	9.19296	8.82292	7.11198	11.4107	9.42546	5.54455	6.55395
7p14.3	NM_007270	11328	FKBP9	FK506 binding protein 9, 63 kDa	1.21699	0.283312	0.0037378	0.165716	9.11406	9.31638	6.95938	11.6005	14.2201	13.1158	14.0386	14.8488	14.9512	20.6298	19.8329	18.3253	8.26611	10.9455	7.93131	14.0307	14.1496	13.3921	7.62303	7.82066	7.27612	10.7974	12.0809	12.8405	9.30543	5.97765	7.88117	17.7775	16.4374	17.6065	4.29464	4.23373	12.908	10.924	11.0597	8.81112	17.8982	10.7096	10.9185	9.52691	8.32625
17q21.2	NM_198830	47	ACLY	ATP citrate lyase	0.866793	-0.20624	0.00373944	0.165716	11.5333	10.9037	9.8812	11.8762	10.407	11.9396	9.27665	9.96295	9.57888	9.4913	9.68558	6.2368	10.4107	11.7705	9.60361	11.9345	12.9664	12.8728	18.2889	20.3727	19.6911	14.5402	13.3061	11.476	8.71063	10.3166	9.10052	8.53005	9.08836	11.1857	8.59445	9.77327	14.3664	10.7366	16.2628	13.5773	9.97397	10.5061	8.70357	12.2009	15.9399
12q24.11	NM_001145374	121642	ALKBH2	alkB, alkylation repair homolog 2 (E. coli)	1.30693	0.386178	0.00375442	0.165716	8.28151	8.03829	7.48739	5.85744	6.97262	6.0685	5.36193	5.27172	4.99198	3.95736	4.83458	4.07116	7.71272	8.52146	9.05271	4.95216	5.94403	4.15457	6.45452	6.63593	5.58334	4.02316	3.33245	4.19434	3.33841	3.5084	3.76695	4.10965	5.69976	4.26118	1.85737	2.63273	2.05143	4.31248	4.99665	4.15619	4.7871	3.76165	4.0252	4.03541	4.03309
5q35.3	NR_045680	100859930	HEIH	hepatocellular carcinoma up-regulated EZH2-associated long non-coding RNA	0.765748	-0.385059	0.00377253	0.165716	3.65495	3.72945	4.83645	2.27491	2.88741	1.94592	3.20499	3.53147	3.93496	3.95252	4.13275	4.6455	6.51911	5.00923	5.82422	5.40063	4.21371	3.90358	5.35914	5.14635	5.88145	9.18089	7.62227	9.70605	4.07925	3.67377	3.42766	6.09201	8.36713	8.54308	4.05578	3.64512	2.73963	5.59413	5.41464	4.94977	4.26346	3.96529	3.01464	2.14472	2.91877
15q14	NM_080650	89978	DPH6	diphthamine biosynthesis 6	1.27474	0.350198	0.00377297	0.165716	1.68692	1.69741	2.10749	2.20713	2.81197	2.47973	2.604	2.36996	2.83952	1.75904	1.6889	1.22567	1.35657	1.66505	0.892868	1.13075	3.26207	3.37275	1.83096	1.57076	1.59125	1.58961	1.72085	1.51858	1.41455	2.71563	1.74044	1.65438	1.83442	2.4378	0.827129	0.796593	1.68565	1.94057	1.61821	1.19246	2.21009	2.42613	2.19289	1.27744	1.18626
19p13.2	NM_001130031	54811	ZNF562	zinc finger protein 562	1.46311	0.549034	0.00379313	0.165716	3.54911	3.28361	3.38727	5.09054	5.44045	4.23198	4.4232	2.47442	2.95762	4.16392	4.35231	2.9664	4.77627	5.4348	4.63421	3.19598	2.1558	2.85488	2.9484	1.54406	3.04663	3.94957	3.79936	4.47174	1.80937	0.944287	2.26809	2.86798	2.26029	2.43895	0.339086	0.337029	0.000137	1.87185	2.11207	2.46876	3.75019	4.34646	4.72471	2.58976	2.66418
2p25.1	NM_024894	79954	NOL10	nucleolar protein 10	1.22634	0.294362	0.00381085	0.165716	4.36834	3.58146	4.30998	3.36121	4.90265	4.0947	5.46576	4.91677	3.55002	6.03436	7.58948	6.53704	4.97865	4.33703	3.42073	5.3798	4.97849	6.65015	2.7999	1.96824	2.48698	4.3267	4.77163	3.09307	3.62714	2.22972	3.43212	5.57541	4.8482	4.12878	2.04517	1.45003	2.25707	4.8156	4.51851	4.02667	5.24567	3.33041	5.40257	3.50932	2.80721
17p13.2	NM_016376	51479	ANKFY1	ankyrin repeat and FYVE domain containing 1	0.852826	-0.229676	0.00381569	0.165716	3.21198	3.03325	2.01478	3.79311	3.34493	3.31653	4.56794	5.02789	4.07653	5.51692	5.59332	5.54494	3.32125	3.22827	3.8326	4.96173	3.57646	6.06717	5.09392	5.35665	7.24392	6.23525	4.91045	4.8357	6.09056	4.38538	4.157	4.73586	5.13518	5.44008	3.84803	3.79757	6.85793	4.38831	4.9512	4.33855	4.2895	5.66442	4.77807	4.675	5.99477
6p25.2	NM_001069	7280	TUBB2A	tubulin, beta 2A class IIa	0.833134	-0.26338	0.00381988	0.165716	325.161	391.515	365.86	313.269	308.121	286.674	131.616	107.589	121.425	23.0415	30.237	36.8291	250.346	269.131	291.772	115.971	261.112	105.538	606.468	504.125	676.115	106.388	82.0822	83.1971	354.915	434.482	368.343	191.081	221.279	283.816	206.504	241.119	96.2608	181.557	215.825	197.709	164.877	260.889	171.449	205.855	238.904
19p13.2	NM_014975	22983	MAST1	microtubule associated serine/threonine kinase 1	0.617514	-0.695456	0.00384013	0.165874	9.03035	10.0738	6.61334	7.40349	6.07815	6.24992	2.82779	2.29257	2.37974	0.411976	0.466805	0.659069	4.57083	4.45081	7.56265	2.25155	4.82524	2.03446	11.1021	12.5262	15.207	4.97169	4.33159	3.98118	9.54825	8.61845	8.21623	4.30701	5.16416	7.13397	9.2343	9.59322	4.93422	5.90093	5.96192	7.12116	4.10749	6.58527	5.09238	5.00394	8.01393
1q25.1	NR_002578	60674	GAS5	growth arrest-specific 5 (non-protein coding)	1.06158	0.0862165	0.00386742	0.166332	196.551	163.745	230.654	163.861	190.337	191.754	208.462	202.613	228.719	257.101	209.002	245.785	153.741	213.33	202.212	134.977	200.433	183.799	125.335	116.906	101.444	149.775	154.453	145.057	113.156	159.955	143.96	284.958	254.561	217.882	53.0639	77.0079	84.1159	192.431	193.587	165.849	202.281	182.38	218.289	117.795	86.0956
9q22.33	NM_001333	1515	CTSV	cathepsin V	1.74528	0.80346	0.00389401	0.166757	0.977846	0.511554	0.664361	1.43519	2.45429	3.2098	3.20418	4.13772	3.61733	12.9097	14.2656	12.5845	3.04	2.30139	1.90243	4.21341	0.555839	2.47866	4.2e-05	0.416784	0.444262	1.2327	1.44503	1.29346	0.56169	0.60121	0.853511	4.72192	4.45527	3.24921	0.450923	6.8e-05	1.1353	3.52761	2.56851	2.07849	4.82528	3.20424	3.33074	0.671468	0.568986
3p14.1	NM_007114	7110	TMF1	TATA element modulatory factor 1	1.13168	0.178463	0.0039884	0.168035	10.4169	8.50441	8.13935	9.83356	11.5716	10.0041	10.6974	10.7746	10.5464	11.9748	15.792	11.1379	10.9404	10.1195	8.79536	10.4243	10.888	12.8185	8.05785	9.32673	9.56507	7.59258	8.17799	9.01348	6.69127	5.68457	8.88166	12.8512	10.4746	10.1697	4.8657	3.90899	4.93574	9.98564	10.7772	10.0287	10.5834	9.43273	13.173	9.95186	9.05516
15q26.3	NM_018445	55829	VIMP	VCP-interacting membrane protein	1.09714	0.133743	0.00399409	0.168035	22.965	19.3965	25.558	27.5949	29.2063	26.2319	23.7851	26.8455	24.4608	21.9713	26.7525	23.2901	30.4266	34.7724	31.7349	21.1679	30.9091	19.652	19.3648	18.0332	17.0658	12.5874	13.1475	17.4396	14.9247	20.5201	16.8772	25.1523	20.5489	18.0644	10.8928	8.36032	13.5323	26.0731	25.4404	20.4092	25.6003	20.061	21.2432	23.0103	21.1939
17q12	NM_001242464	84152	PPP1R1B	protein phosphatase 1, regulatory (inhibitor) subunit 1B	1.80127	0.849012	0.00399838	0.168035	5.32338	3.17587	6.22971	5.00269	4.85662	3.28097	8.38126	6.6709	4.36527	1.19386	0.852747	6.1e-05	4.07157	3.28934	4.71177	0.000613	1.00164	1.13346	0.806832	0.986303	0.926051	0.060423	0.126944	1.01102	1.10488	1.09023	1.32907	2.67931	2.01779	0.147234	6.34872	2.32259	2.85515	1.64821	4.11312	2.39076	3.13982	3.2416	0.184174	4.88064	5.72652
Xq26.2	NR_026975	286467	RP11-453F18__B.1	uncharacterized LOC286467	1.56026	0.64179	0.00402114	0.168035	2.60974	1.37848	1.9122	4.1176	5.57179	5.65158	7.49022	6.52525	7.27361	6.18983	6.37272	4.90647	8.34396	9.49356	7.49578	4.70356	3.53106	4.59792	1.75213	2.12909	1.90085	2.03321	2.50713	2.06366	1.26684	0.763677	1.0807	2.76609	1.85897	1.52551	1.28059	1.25861	2.916	2.21157	2.03749	2.25587	3.53493	2.86939	3.78611	3.50115	2.15902
5q22.1-q22.2	NM_022140	64097	EPB41L4A	erythrocyte membrane protein band 4.1 like 4A	0.81477	-0.295535	0.00402888	0.168035	2.9296	2.24356	1.98138	3.52031	3.23886	3.69866	4.19932	3.92737	3.6657	2.44539	3.54516	3.04438	2.40208	2.24479	2.12002	3.44813	4.67719	5.10678	3.60702	3.4907	4.54199	4.09954	3.94692	3.76483	4.02619	3.40588	4.22254	4.86788	4.93433	5.15951	5.39951	4.16502	4.85714	4.37625	3.5671	3.48025	4.69516	5.19658	4.41179	4.13842	4.26717
19q13.12	NR_110723	101927720	LOC101927720	n/a	0.780286	-0.357925	0.00404371	0.168035	2.4256	2.10638	2.58297	1.97667	2.20144	2.04361	1.81861	1.64438	2.87165	2.46263	1.83835	2.29372	1.64736	1.2434	1.95667	3.36346	3.98529	3.01889	3.2814	2.58528	3.02226	4.25026	2.69668	3.88166	2.74903	3.29089	3.84266	2.72352	3.36732	3.71607	1.19132	1.56907	1.9813	3.48702	3.87808	2.91604	2.68284	2.54263	3.20978	3.56199	1.92521
3q23	NM_004766	9276	COPB2	coatomer protein complex, subunit beta 2 (beta prime)	1.14338	0.193303	0.00406174	0.168035	36.5704	28.3688	32.0338	34.2672	45.0006	39.0052	55.332	57.0939	53.5408	71.0943	86.3559	67.6885	40.7335	40.4473	28.0576	57.8953	47.3954	61.9768	20.701	20.1488	23.864	39.7749	40.8585	44.8946	21.9672	12.5695	25.8781	48.1339	44.741	47.5348	11.2554	11.6942	13.7783	42.67	41.9273	37.1101	53.8481	39.5374	51.5267	38.1331	34.6612
15q26.1	NR_120372	101926895	LOC101926895	n/a	0.693076	-0.528914	0.00407108	0.168035	2.53966	3.44439	4.28914	1.78907	1.40528	1.65767	1.25811	1.29652	0.937245	0.528349	0.820646	0.46684	1.04401	1.6966	2.32546	2.77784	3.11625	1.81162	4.019	3.48391	4.33103	2.66268	3.46017	3.87734	2.46	2.50639	3.07734	1.07236	1.55284	2.1846	1.99181	4.82584	1.43695	2.32954	2.3833	3.33624	1.20816	2.54547	2.67336	2.03453	3.11702
13q14.13	NM_031431	83548	COG3	component of oligomeric golgi complex 3	1.15589	0.209	0.00408359	0.168035	9.1006	7.92272	8.07716	8.17543	9.57672	8.52026	7.77597	8.00259	7.5297	8.22744	8.56643	7.49388	7.58615	7.76429	6.31917	8.70124	9.84613	9.63263	9.3361	9.1583	8.32473	4.68463	5.39769	5.65224	5.60269	4.30423	7.65776	8.62642	7.52107	7.36877	2.8265	2.58691	4.80453	7.39041	7.96023	6.70841	8.1652	7.62515	9.8478	6.04036	6.47162
2q31.1	NM_004882	9541	CIR1	corepressor interacting with RBPJ, 1	1.21574	0.28183	0.00411331	0.168035	10.727	9.01688	9.54718	7.55551	12.0318	8.03483	8.8628	9.76618	8.64045	11.2091	14.3051	10.2009	8.40273	8.30327	4.62782	12.3902	8.88709	13.4559	5.01753	5.52389	7.16697	9.05283	8.42305	9.79185	4.25619	2.89164	7.00073	10.5508	10.1832	10.7367	2.41159	3.0152	3.11646	8.84549	8.80467	8.19448	11.0576	8.72942	12.6542	7.49567	8.16619
22q13.2	NR_002184	91695	RRP7B	ribosomal RNA processing 7 homolog B (S. cerevisiae)	0.773495	-0.370536	0.00412441	0.168035	4.93932	3.84852	3.26846	3.21739	2.41988	2.99578	2.51524	2.6895	3.16369	2.13809	1.52014	2.16683	3.13701	2.59601	3.06424	2.47587	3.53647	3.11649	4.35207	4.56588	4.90638	5.66733	4.86372	4.112	6.75851	3.69015	5.38877	4.33258	4.07723	4.72201	6.93891	5.82559	3.84129	4.33354	4.32736	4.71634	3.99736	2.69398	3.22255	3.55236	4.19973
8p12	NM_000553	7486	WRN	Werner syndrome, RecQ helicase-like	1.26189	0.335591	0.00412808	0.168035	3.66746	3.22877	3.98957	3.33097	3.13197	2.96886	3.27625	3.05297	3.07992	3.30215	4.14292	3.44574	4.12211	3.65446	2.78115	3.97552	4.14522	5.23654	2.16101	2.24304	2.37674	2.19983	2.79585	2.30064	2.26099	1.51439	2.77304	2.82138	2.6039	3.08123	0.846149	0.794091	1.44078	3.25014	3.28395	3.03571	3.32465	2.69452	4.11726	2.15763	2.1577
12p12.1	NM_020297	10060	ABCC9	ATP-binding cassette, sub-family C (CFTR/MRP), member 9	0.765333	-0.38584	0.00416474	0.168035	1.9893	2.68873	1.65645	1.72145	1.24318	1.99832	1.45876	1.29408	1.55132	1.91178	1.54907	1.39849	1.41462	1.53833	1.52496	2.41552	1.92178	2.49627	2.80162	3.46875	3.0214	1.7246	2.02777	1.36192	5.2929	2.69107	4.21755	2.31821	2.35161	2.33822	2.15896	1.79465	2.98913	1.86803	2.19001	2.92945	1.64738	1.91866	2.05573	2.00024	3.83265
9q34.11	NM_001261	1025	CDK9	cyclin-dependent kinase 9	0.90227	-0.148368	0.00417081	0.168035	11.0707	11.0094	9.39297	12.1826	11.7091	11.6944	11.2007	11.5056	11.4664	9.67255	9.36864	10.2559	12.2868	11.004	11.8039	8.93279	11.2721	10.4164	12.1782	12.5567	14.5054	14.129	11.3891	13.7977	15.158	12.6096	12.9368	10.7436	12.0433	13.3986	17.858	17.0748	13.2043	12.5744	13.3507	12.4154	12.6409	13.3122	10.6952	11.0593	11.7596
Xq26.2	NM_001448	2239	GPC4	glypican 4	1.25978	0.333172	0.00417646	0.168035	13.7656	10.7759	8.14505	18.6123	15.3016	13.9315	26.4582	19.231	21.8865	7.69217	9.48462	8.38246	19.2689	17.4239	15.6887	6.45062	7.02896	9.33619	4.65267	5.14707	5.28532	7.3825	7.50659	6.16428	7.07437	7.13886	7.2958	6.36334	5.95331	6.98328	1.7547	2.17874	4.67462	9.63214	10.5812	9.65213	15.9585	16.2812	17.2841	11.118	11.337
4p16.3	NM_001146069	10227	MFSD10	major facilitator superfamily domain containing 10	0.862338	-0.213674	0.00422212	0.168204	8.40219	8.0014	7.18289	10.1787	12.2468	11.2353	9.86665	10.0602	9.83053	13.0674	9.23042	10.7531	7.08432	10.1134	8.97749	11.0079	9.31638	8.93684	10.8174	11.3125	13.7011	13.2415	8.84578	12.962	10.8494	11.0455	10.892	10.5105	11.2674	18.0698	24.4583	20.1652	12.6807	11.04	10.9527	12.5387	11.85	12.6078	9.06105	16.8447	12.5016
20q11.23	NM_001042486	22839	DLGAP4	discs, large (Drosophila) homolog-associated protein 4	0.840451	-0.250765	0.00422711	0.168204	17.8423	18.2486	15.3908	19.023	17.3634	18.9165	11.8932	10.3143	11.8313	6.49654	8.86049	8.53048	14.8319	13.8093	15.2485	13.8691	14.8603	12.4253	19.2807	18.8001	22.3596	12.4726	11.2312	12.1064	18.5254	18.2312	17.2765	14.2459	16.5749	20.1879	26.4009	24.8244	14.2044	19.6886	18.2211	20.8914	15.6197	18.6605	16.3398	11.4263	16.0386
20q13.13	NM_020820	57580	PREX1	phosphatidylinositol-3,4,5-trisphosphate-dependent Rac exchange factor 1	0.754592	-0.406231	0.00423617	0.168204	11.0015	12.0717	9.4262	12.5845	12.2399	12.6566	8.6582	7.64703	8.09813	2.51627	3.38774	3.29973	8.26625	8.95961	9.48182	9.14765	11.3856	8.86115	16.1872	14.9345	16.9553	10.5047	8.41979	9.69451	18.0083	16.8751	14.1505	6.40007	6.54184	9.00124	19.9894	19.9829	13.6764	11.9789	13.6347	12.8737	10.904	13.2901	12.8525	11.339	11.6697
11q13.4-q13.5	NM_030792	81544	GDPD5	glycerophosphodiester phosphodiesterase domain containing 5	0.773464	-0.370595	0.00424809	0.168204	3.62843	3.97289	3.17048	5.93704	6.91289	5.7931	3.2984	3.53184	3.4049	2.21319	2.02903	2.32143	3.7214	3.873	4.20995	3.12636	4.45676	3.44831	8.41804	8.02506	8.859	4.9715	3.9065	4.3812	5.99671	4.86854	5.41038	4.36866	5.27609	5.93933	7.77522	7.07587	4.01685	4.80476	4.37742	4.68718	4.51842	5.85403	4.49744	5.29241	5.26372
7q11.21	NM_018264	55253	TYW1	tRNA-yW synthesizing protein 1 homolog (S. cerevisiae)	1.18971	0.250611	0.0042937	0.168615	4.56125	3.47741	3.34388	3.76642	4.6495	4.6816	5.09483	5.02877	4.49289	6.07589	6.71969	5.81294	4.47194	4.60722	3.52113	5.56127	5.4697	5.67409	3.47713	3.85221	3.66803	4.75916	4.55022	4.63996	3.14001	2.37089	2.93087	4.88073	4.60386	4.09036	1.7005	1.36939	2.00317	3.85689	4.39151	3.67414	5.91124	4.31513	5.65951	3.79189	3.49895
8p21.2	NM_005382	4741	NEFM	neurofilament, medium polypeptide	0.743276	-0.428031	0.00429704	0.168615	6.74746	6.34347	4.47586	21.0561	21.8973	26.6888	8.86956	10.9051	8.07337	5.29856	8.51274	6.01966	5.73215	5.92239	4.35041	16.5865	18.304	40.1606	31.4866	34.3801	50.7558	16.1642	11.9196	12.0003	10.762	11.3749	9.91153	14.1984	13.8875	20.8756	29.3084	23.7473	16.8436	14.7801	14.735	14.144	18.7329	19.3239	20.965	9.45607	10.1987
20p13	NM_001282533	9762	LZTS3	leucine zipper, putative tumor suppressor family member 3	0.750444	-0.414184	0.00431727	0.168615	6.98041	7.08019	6.92715	6.74408	6.80341	6.6908	3.53246	3.45254	3.83969	2.7715	2.16707	2.61133	5.67378	5.89724	7.03311	2.45921	5.71525	4.53612	11.3667	12.0609	13.7873	8.02377	6.39414	7.2405	7.80569	8.03209	7.54732	4.69045	5.02684	7.08191	8.67827	8.10973	3.93768	6.03441	6.05943	7.43964	5.73614	6.3339	5.51527	4.52666	5.66161
9q34.3	NM_152421	138311	FAM69B	family with sequence similarity 69, member B	0.875691	-0.191506	0.00432606	0.168615	17.3929	17.6365	24.0856	22.0677	21.5463	18.9443	16.3379	17.7338	18.3198	10.1057	11.4636	11.6633	19.6844	18.457	21.0358	13.8629	20.5964	17.6646	19.3695	17.6643	21.3072	21.0148	16.542	18.6955	16.7327	17.6977	14.9172	16.2159	18.2995	24.4343	36.926	29.8742	15.1391	19.3736	19.7324	20.8081	21.5042	22.8496	16.899	22.2211	17.9818
5p15.33	NM_033267	153572	IRX2	iroquois homeobox 2	0.650043	-0.621394	0.00441509	0.171415	0.854517	1.36237	1.63132	1.62307	1.36582	1.90109	0.90609	0.854787	0.863932	1.56368	1.46582	1.16686	0.661199	0.539954	0.613197	5.15181	7.48029	2.59185	5.05151	4.00288	4.34527	0.446373	0.680389	0.585204	5.06907	6.34119	7.59464	3.27424	2.1883	2.523	2.28789	3.36155	3.53309	1.73217	1.20924	1.51202	1.08847	1.95765	2.02589	1.65797	1.84368
2q37.3	NM_018645	55502	HES6	hes family bHLH transcription factor 6	0.65031	-0.620801	0.00446155	0.172548	36.807	36.0618	57.1787	61.5943	47.7378	44.1828	11.9358	14.3531	19.5439	2.52341	1.26001	2.5621	23.3567	26.7577	34.1268	18.4166	39.8209	27.5754	37.4791	22.2001	35.0167	15.3167	22.1518	27.9976	35.0267	43.2453	26.3253	19.4907	24.0297	38.0713	20.6105	26.7028	11.0767	26.5994	36.4511	39.6568	21.2276	31.9823	34.4199	17.7177	18.3697
12q24.31	NM_025140	80212	CCDC92	coiled-coil domain containing 92	0.85523	-0.225616	0.00449371	0.172871	6.92265	6.60164	3.49082	10.791	9.21664	8.85984	7.36829	6.14908	7.98835	5.1642	4.70644	5.2579	6.59569	8.7521	7.81675	10.7204	7.80245	6.84396	9.95543	9.72743	10.5999	10.2796	8.80716	9.65045	8.22863	5.59304	5.86984	7.50422	7.02782	8.59627	12.1383	10.0363	8.56041	8.35746	9.32643	7.22815	8.14133	6.62232	5.94235	8.7724	8.39303
15q25.1	NM_004378	1381	CRABP1	cellular retinoic acid binding protein 1	0.898814	-0.153905	0.00453389	0.172871	113.118	100.213	144.598	335.312	420.996	395.742	124.234	179.432	137.168	151.584	137.037	145.25	237.007	406.384	256.184	226.868	175.342	312.493	230.664	227.749	211.756	1271.06	990.982	982.863	176.202	270.358	162.536	146.338	215.802	282.669	236.488	245.854	103.919	213.933	194.21	194.391	439.291	438.045	362.853	211.193	151.341
11q13.5	NM_207577	4135	MAP6	microtubule-associated protein 6	0.721128	-0.471673	0.00454671	0.172871	15.5283	16.2161	12.4229	20.0236	18.0428	22.3338	13.672	10.9244	12.9208	1.83141	4.11769	3.47543	7.18157	8.6811	8.09181	15.5561	23.6373	11.8444	27.2185	29.2757	29.3995	14.6494	11.9284	12.2434	23.3264	22.4963	22.7416	16.9416	17.068	17.9271	9.8808	8.85773	12.9711	13.1739	16.1684	14.6031	13.4439	18.9213	18.2871	16.1639	20.0693
1p35.2	NM_014654	9672	SDC3	syndecan 3	0.84338	-0.245745	0.00456402	0.172871	25.3633	31.2714	26.5074	37.0168	32.1586	33.8179	22.373	21.4585	23.2046	14.9777	14.8608	17.4377	15.9174	16.6811	16.2852	21.3088	32.671	23.336	62.6171	64.1539	69.6599	26.4683	21.4245	25.8838	50.2387	55.3148	41.8075	31.5321	39.6273	49.5755	49.172	47.0744	24.1145	31.3746	30.3019	30.3715	33.986	42.5148	28.4197	22.6645	27.7706
11q12.1	NM_002556	5007	OSBP	oxysterol binding protein	1.12019	0.163743	0.00457612	0.172871	10.9259	10.1878	8.50812	10.2225	10.7	10.082	9.68547	9.95425	9.15569	11.785	14.37	11.666	11.1232	11.7276	10.3116	9.76367	10.0105	13.637	7.17235	8.43057	9.19921	8.69456	7.94512	8.73362	7.50806	6.29177	8.33068	8.75771	10.0754	8.82159	4.05373	4.13309	6.34328	9.38706	10.4019	9.80932	11.3982	9.69997	13.1623	7.0843	8.76278
12q14.1	NM_005371	4234	METTL1	methyltransferase like 1	1.31365	0.393583	0.00457642	0.172871	2.97753	2.00399	2.27335	5.40211	5.97351	4.54389	5.51268	5.42449	5.5112	5.86841	4.61968	5.42055	5.98572	8.50702	3.68605	4.58065	3.83416	3.47586	2.68673	1.86105	2.40095	2.77149	2.69719	3.32495	3.35124	2.70661	1.88938	4.52957	4.22818	5.07944	2.6892	3.4322	1.79781	4.60692	4.27368	3.9653	3.69238	3.05817	3.46613	2.10909	1.89274
13q21.33	NM_014953	22894	DIS3	DIS3 mitotic control homolog (S. cerevisiae)	1.39177	0.476925	0.00459118	0.172871	4.6605	3.93883	3.89421	2.51095	5.1717	5.16703	3.53137	3.61609	3.14736	4.33376	4.39014	3.84877	3.90588	4.18755	2.92042	5.26734	5.22188	5.37497	4.15519	4.28879	3.99391	2.40438	2.92984	1.32838	2.4325	1.50798	2.57098	3.67341	2.98606	3.71018	1.30571	0.180079	1.14656	2.95312	3.28135	1.89495	3.74705	2.68156	3.77272	1.96043	1.71557
11q13.1	NM_138689	26472	PPP1R14B	protein phosphatase 1, regulatory (inhibitor) subunit 14B	0.936213	-0.0950913	0.00460935	0.172902	63.3247	67.912	79.8947	57.4881	54.8761	53.8683	48.5653	55.8915	56.5881	44.0742	41.6756	45.8495	75.3369	72.9755	73.758	60.5047	64.7128	40.8299	78.112	71.4913	73.5011	61.3681	45.6932	56.3202	62.3787	83.5664	54.5947	50.4599	58.8155	72.2831	82.9563	85.4499	35.7026	55.0033	49.8142	53.9818	64.4941	63.6292	50.9351	45.3883	42.9331
6q23.3	NM_014739	9774	BCLAF1	BCL2-associated transcription factor 1	1.19528	0.257344	0.00466375	0.173574	12.9526	9.84303	11.9726	12.2783	14.3959	14.2769	14.1144	14.9928	13.778	13.7574	19.9302	13.4845	16.3512	14.1208	10.245	17.5703	15.7174	20.9613	10.9266	12.2432	11.0115	7.96731	9.78654	6.59476	8.41588	6.50645	8.23835	14.4987	12.3829	13.2125	3.99012	3.36202	4.46096	10.4591	11.5367	8.79358	14.0276	10.9409	15.0906	8.43386	8.72953
11p11.2	NM_139178	221120	ALKBH3	alkB, alkylation repair homolog 3 (E. coli)	1.21981	0.286651	0.00468527	0.173574	3.83237	3.91768	3.41097	5.32033	6.3475	6.73405	6.64438	6.28558	5.24097	6.86584	4.95301	5.58169	7.74829	7.46858	7.30412	4.25957	5.7574	5.33731	6.43345	4.7166	4.36264	3.57959	3.24433	3.03288	3.16504	2.64514	3.32808	4.91	4.90628	5.12411	1.90982	1.7968	3.33799	3.74835	3.93193	2.82311	4.88298	3.93582	4.25976	4.58114	2.81745
16q13	NM_018233	55239	OGFOD1	2-oxoglutarate and iron-dependent oxygenase domain containing 1	1.10849	0.148599	0.00470243	0.173574	9.40901	8.18626	10.2333	10.3347	11.4892	10.9465	9.63476	10.2348	10.3678	11.2957	13.8586	11.3862	10.1397	12.263	8.60763	10.9515	11.7515	11.4984	10.2952	9.6851	9.65749	7.00188	8.30064	9.01306	5.63762	6.88046	8.03955	11.5114	9.62906	9.73408	4.16577	3.59294	8.55654	9.29226	9.34465	8.44623	11.3268	9.97828	11.5552	7.68325	6.61988
16q13	NM_014685	9709	HERPUD1	homocysteine-inducible, endoplasmic reticulum stress-inducible, ubiquitin-like domain member 1	1.11171	0.152784	0.00473137	0.173574	26.9366	21.9427	26.5224	23.4853	29.8278	24.8117	26.5522	26.5823	29.0822	31.6425	30.2449	31.0439	18.5074	20.7871	21.9614	28.7254	35.2556	33.7519	18.0698	19.9819	18.0843	23.2674	22.6875	25.7757	14.262	15.4414	16.1039	28.4068	23.2507	25.0104	6.59103	7.9446	13.7034	25.9188	27.3392	24.518	29.1274	19.3626	30.1281	22.944	22.3071
1p36.13	NM_001278166	4681	NBL1	neuroblastoma 1, DAN family BMP antagonist	0.692308	-0.530513	0.00473206	0.173574	2.41638	0.419181	2.64945	5.85093	6.64842	5.44142	1.77618	4.29323	3.53455	2.74789	3.4079	4.06203	1.31348	6.02837	3.84494	5.29715	5.40461	5.72727	3.77875	3.90341	5.21605	11.5025	10.6376	10.0606	2.39488	5.2798	5.20326	3.58913	3.55758	5.12683	13.0154	9.75963	6.62763	5.29623	2.90944	6.0386	5.41513	5.48269	5.26578	3.69013	3.68643
2q37.3	NM_004544	4705	NDUFA10	NADH dehydrogenase (ubiquinone) 1 alpha subcomplex, 10, 42kDa	1.13161	0.17838	0.00474819	0.173574	8.15811	6.82404	7.50675	7.82587	8.8811	8.52799	8.65897	8.85763	8.14678	7.18043	7.95966	7.94377	7.74469	8.89458	6.76183	7.39569	9.57053	11.7112	8.26324	8.26624	8.80552	5.21236	5.13889	4.83637	5.84824	5.00972	5.82396	8.83712	7.40911	7.96233	3.20293	2.82802	4.71232	7.13489	7.59356	7.1464	8.7848	7.52811	7.93806	5.52208	4.91429
15q11.2	NR_003330	100033427	SNORD116-15	small nucleolar RNA, C/D box 116-15	0.815222	-0.294735	0.00479056	0.173574	3273.66	6029.3	4010.26	182.076	1441.49	587.797	612.188	854.306	960.029	220.568	2120.35	685.907	1999.28	529.014	1069.22	1068.18	777.671	1140.61	6040.9	3925.37	7483.25	4189.16	5632.77	4575.79	1810.05	755.392	2362.42	4316.07	3335.68	2534.81	1344.65	1770.88	1000.16	1861.31	1606.68	2633.91	1603.13	1256.66	4776.02	2067.09	2287.56
2q31.1	NM_001201428	26003	GORASP2	golgi reassembly stacking protein 2, 55kDa	1.16047	0.214712	0.00480933	0.173574	14.878	15.1169	11.4616	16.5469	18.4043	20.3827	19.0531	20.1249	22.5794	21.2166	19.7601	22.992	16.1096	24.1676	19.7032	23.0861	23.1199	16.9306	14.6983	14.3364	11.6573	19.517	18.7727	21.1078	11.2174	8.90337	10.7055	16.4318	11.4934	11.836	6.11892	4.19281	11.1919	18.8236	18.4355	14.9549	16.5296	12.1415	13.9263	14.5486	13.4506
16p13.3	NM_001005407	8912	CACNA1H	calcium channel, voltage-dependent, T type, alpha 1H subunit	0.725919	-0.46212	0.00482818	0.173574	5.58516	3.47621	4.87957	5.69076	5.61477	3.22916	3.99165	3.04975	3.71039	2.62006	2.75612	2.70405	7.7652	5.74646	7.39657	6.3601	3.19054	4.26582	5.78144	4.66978	9.44977	11.5564	9.14556	9.9667	4.21534	1.07445	2.91947	4.92768	3.93359	4.97046	7.60081	6.82255	2.86586	7.14368	5.09288	9.43494	5.19451	4.38695	4.96688	5.24458	5.57623
3q29	NM_001128148	7037	TFRC	transferrin receptor	1.24833	0.319998	0.00483753	0.173574	13.2165	10.0857	12.3824	12.6504	15.8519	14.1298	18.7937	17.438	17.5122	34.4473	38.7307	33.2646	14.3537	13.5138	9.43745	16.7776	18.0529	18.5678	10.5375	10.78	11.1738	12.289	12.7767	12.8485	9.15312	7.23932	11.9926	19.8606	17.2467	16.6047	4.23585	3.16961	7.62493	17.346	14.5502	13.4589	34.0749	23.1896	28.5126	8.14905	8.09324
13q12.12	NM_014363	26278	SACS	spastic ataxia of Charlevoix-Saguenay (sacsin)	0.792497	-0.335522	0.00484093	0.173574	6.32683	4.92533	4.56477	5.89413	5.87506	6.78772	4.24977	3.89033	3.63376	2.81484	3.88222	2.47706	5.69503	6.00404	4.70019	8.24945	8.26859	6.79715	8.71635	9.23005	9.00037	4.59759	5.85004	4.00914	7.99492	5.44507	8.86484	5.82435	5.23748	5.89941	2.42951	2.97905	4.45339	4.0934	4.91366	4.6554	6.32223	6.37885	8.66685	5.75892	6.21762
19q13.13	NM_152279	92285	ZNF585B	zinc finger protein 585B	1.36623	0.450204	0.00485924	0.173574	2.33576	2.29036	2.21424	2.70942	2.52244	2.60076	2.64463	2.12536	2.60689	2.88137	3.65807	2.63288	2.58614	2.53495	2.30048	2.39295	1.77666	2.6615	2.48857	2.45245	2.73088	1.60318	1.60871	1.41923	2.32701	1.79414	2.4004	2.67802	2.29298	2.50075	0.515414	0.384063	0.558709	2.38004	2.03887	2.15678	3.38092	3.09837	3.12568	1.60268	1.68634
13q14.3	NM_006704	10910	SUGT1	SGT1, suppressor of G2 allele of SKP1 (S. cerevisiae)	1.17899	0.237551	0.00486513	0.173574	11.1157	8.94589	9.95276	8.53947	10.3776	8.11571	7.52387	6.9626	7.2753	7.72832	10.2644	9.2873	7.84831	8.87266	6.29313	10.2466	9.7042	8.06069	6.56142	5.57335	4.77637	5.13676	6.55577	6.00199	5.26331	3.04502	6.82346	8.68451	6.85814	8.50552	3.11286	2.53799	3.56358	8.92433	7.44056	8.84034	9.09645	8.24639	12.8216	7.30018	5.49959
10q26.2	NM_000375	7390	UROS	uroporphyrinogen III synthase	1.12488	0.169769	0.00487933	0.173574	10.9704	9.13251	9.94355	14.8776	16.3556	17.706	16.2452	17.6123	20.3813	15.8184	13.8526	16.5697	10.9956	14.1636	11.9767	9.87612	14.7815	12.9287	16.1014	14.8217	13.0973	9.60748	10.3633	9.53259	14.5506	17.3703	13.4479	13.27	10.9002	11.8181	6.54094	7.3602	9.71426	12.5656	12.9441	9.15179	15.9053	16.4539	11.8025	10.0203	7.36109
1q32.1	NM_001252102	23046	KIF21B	kinesin family member 21B	0.629992	-0.666594	0.00488817	0.173574	13.0706	14.1007	8.08932	14.9791	12.0964	13.9229	6.53469	4.68944	6.86127	1.04266	0.490692	1.90328	12.1132	11.7295	14.5433	3.05435	10.2574	3.3819	16.9354	17.2727	23.4993	6.55534	5.73184	5.06039	15.8037	14.5165	10.7619	10.9892	13.8574	15.1508	16.2526	16.6226	7.82334	10.85	11.2294	12.5397	8.97225	14.3046	9.0492	11.0349	14.2095
1p36.11	NM_005517	3151	HMGN2	high mobility group nucleosomal binding domain 2	1.04679	0.065971	0.00500827	0.177207	119.465	93.0961	123.51	170.916	147.274	177.524	173.19	196.615	191.256	167.042	189.923	186	156.566	187.844	143.588	185.056	233.825	161.943	96.0492	88.8212	85.6683	106.284	99.5355	108.534	114.419	164.2	114.674	164.107	164.909	153.826	58.2714	58.1388	89.3945	150.528	151.217	116.904	159.618	140.388	140.75	98.6118	73.5017
17q11.2	NM_001007025	9527	GOSR1	golgi SNAP receptor complex member 1	1.19387	0.255641	0.00506199	0.177965	5.00681	4.30315	2.92286	6.07397	4.34025	4.83559	5.67588	5.19056	6.21816	6.20473	5.49897	5.66789	4.36374	4.53419	3.97479	5.26678	5.22447	4.93667	4.10811	3.73313	2.80193	4.79993	6.19626	6.53159	4.36872	2.88723	3.23119	4.62595	4.22643	3.62049	3.17883	2.09706	5.13477	3.91617	4.81843	4.70932	4.49717	3.94481	3.80294	5.61556	4.08987
14q24.2	NM_005466	10001	MED6	mediator complex subunit 6	1.10285	0.141242	0.00506535	0.177965	7.19982	5.968	7.03478	6.8405	8.15568	6.08146	7.48899	7.23206	7.33061	7.4233	9.85204	7.71157	7.90686	6.95973	6.24434	7.79	7.16184	8.65671	6.34917	6.24562	6.19753	6.79076	7.70602	6.62744	4.7122	4.16145	5.90226	8.78355	7.44217	7.23499	3.18461	3.11536	4.14516	6.55278	6.94865	5.83688	6.59406	6.11527	8.3522	5.6448	5.41807
1p36.33	NM_001110781	728661	SLC35E2B	solute carrier family 35, member E2B	0.898597	-0.154253	0.00511755	0.178324	9.26033	8.47302	7.65424	16.0667	14.9743	14.9458	12.9308	11.7749	11.9521	9.91727	10.3165	10.7409	11.3794	12.3684	11.5691	10.5678	11.3392	12.1987	17.7963	18.5397	20.2579	15.4078	14.4678	14.818	15.0669	12.2725	11.7074	12.7361	12.7293	13.1203	10.5577	11.8301	12.5571	10.8585	11.3752	10.3971	12.7663	11.6361	10.8675	11.8947	13.3373
20p11.23	NM_002196	3642	INSM1	insulinoma-associated 1	0.663541	-0.591743	0.0051317	0.178324	4.40477	4.093	3.60688	6.17537	4.64819	5.66569	2.98051	2.51839	2.72198	0.416677	0.663066	0.655557	4.2315	4.29687	4.75664	5.12518	9.51182	3.33012	6.39518	5.83558	6.78255	3.93421	3.59133	3.76129	7.29531	8.13245	6.81502	6.5238	7.12338	6.66889	3.98574	4.3261	2.10004	3.97351	4.50711	4.23185	2.15591	2.84507	3.63981	3.27912	2.59684
8q21.13	NM_014018	28957	MRPS28	mitochondrial ribosomal protein S28	1.09793	0.13479	0.00513327	0.178324	14.0002	12.4503	17.3802	17.9933	14.4175	14.3675	22.1182	19.0919	19.9689	18.0173	21.4862	22.1208	18.8604	16.7572	19.0049	17.6453	15.8482	15.9828	11.2376	11.1288	8.81164	15.5625	16.4378	18.3432	9.3109	16.4189	11.4416	15.9539	14.5475	13.8999	7.6756	10.7722	12.9741	16.0888	14.9585	13.6662	18.2391	15.3366	15.3848	18.5061	13.0982
1p34.2	NM_006824	10969	EBNA1BP2	EBNA1 binding protein 2	1.16446	0.219659	0.00517198	0.178324	17.1934	14.4556	17.0044	16.4182	20.5918	17.9388	17.3999	20.3468	22.075	18.0155	19.4062	20.3663	22.6664	29.5553	21.5463	18.4609	25.7365	19.7845	20.9067	17.0378	15.9833	11.7507	13.465	10.8985	8.37148	11.0316	9.8692	18.2508	13.7983	14.8646	5.71768	5.15345	13.5686	14.1615	15.3826	11.5128	16.9857	13.7354	14.7006	9.51094	8.24231
3q27.3	NM_016306	51726	DNAJB11	DnaJ (Hsp40) homolog, subfamily B, member 11	1.18096	0.239955	0.00518679	0.178324	14.6703	11.1189	11.5723	12.1069	16.9271	14.9589	15.9017	15.3595	14.691	17.2924	20.6758	16.7894	17.8281	15.9864	11.6576	21.5908	16.6435	18.9783	12.0934	10.8075	11.8843	13.1762	11.7364	11.3886	7.14992	4.62595	9.2279	16.4927	13.7713	13.3329	3.90118	3.39955	5.59654	10.6399	10.4362	11.2567	15.0788	10.6854	15.8664	11.2446	9.8864
22q13.33	NM_001145135	1375	CPT1B	carnitine palmitoyltransferase 1B (muscle)	0.721922	-0.470085	0.00523324	0.178324	2.83847	3.62298	2.52452	2.61943	2.8874	0.193771	2.83257	1.14319	3.11334	3.12892	1.07422	2.75626	2.27839	1.73018	3.34614	2.71025	2.46507	2.36502	3.95814	4.48837	4.93371	4.8373	2.99645	4.78508	5.33947	1.44943	4.07311	3.11189	3.23065	3.27567	5.77529	5.7173	3.82497	4.52059	3.86568	4.40341	2.75293	3.27598	2.92727	5.78557	5.73193
7q11.22	NM_015570	26053	AUTS2	autism susceptibility candidate 2	0.697148	-0.520462	0.0052386	0.178324	8.88291	8.86302	4.54666	6.5011	4.91734	8.00396	5.11939	1.93362	3.33093	1.77857	2.18233	1.3459	6.04338	5.07836	6.06606	5.63928	6.89407	3.95396	14.8359	15.9908	16.6647	3.13077	2.43747	3.32613	9.45214	6.90497	7.68325	5.63119	5.47741	6.37619	5.15022	5.21742	6.09478	5.75915	7.70819	5.85445	5.03285	6.88335	7.26581	5.91948	7.41072
5q22.3	NM_001300759	55521	TRIM36	E3 ubiquitin-protein ligase TRIM36 isoform 5	0.680393	-0.55556	0.00525006	0.178324	5.67008	5.07227	4.96737	3.65857	5.10053	3.76961	2.06388	2.47649	2.08473	0.103075	1.22926	1.00724	3.55674	3.70372	2.47059	4.60485	7.10964	4.40454	10.1057	8.66497	9.7023	4.82118	3.7773	3.73353	4.65278	4.41618	5.47199	5.33104	5.62282	5.42141	1.65083	1.43496	1.49172	3.5083	3.3405	3.17983	3.27066	4.36739	4.83439	2.90737	4.17704
1q21.3	NM_006818	10962	MLLT11	myeloid/lymphoid or mixed-lineage leukemia (trithorax homolog, Drosophila); translocated to, 11	0.862319	-0.213707	0.00525136	0.178324	86.4374	67.4363	78.4734	87.3237	82.1546	82.2557	49.1898	40.3463	41.3598	19.569	24.9989	22.8565	71.7121	65.3326	74.6971	45.8881	79.6553	46.0322	146.896	141.621	130.245	59.8217	47.1102	53.9178	72.1871	124.891	88.8097	49.677	50.7855	58.0632	48.7688	49.8635	37.5571	66.3139	71.0015	62.8943	46.6019	73.5213	74.6247	45.1194	57.273
7p22.1	NM_004227	9265	CYTH3	cytohesin 3	0.868687	-0.203092	0.00526128	0.178324	3.88395	3.56038	2.41104	5.66376	5.1291	5.45571	5.58102	5.35732	5.61888	3.17387	3.42599	3.29757	4.66057	5.59051	5.8165	5.802	5.53504	4.58825	5.014	5.18596	5.09193	5.40207	5.41398	5.52725	5.03067	4.75075	4.6859	4.52143	4.05646	4.23249	4.75538	4.47872	6.44348	5.63675	6.14913	5.41632	4.84948	4.99609	4.15439	5.3302	6.03951
1p13.3	NM_153340	127002	ATXN7L2	ataxin 7-like 2	0.816047	-0.293276	0.00527216	0.178324	2.7483	2.36789	2.56691	4.01267	3.17342	2.74205	2.63231	2.07976	2.368	2.03048	1.79725	2.17584	3.35379	3.6517	3.54199	1.96208	4.37243	1.92963	3.52879	4.09788	4.00562	3.32574	3.56737	3.2973	4.32747	2.7974	3.53663	2.84805	2.92244	3.90392	4.78561	5.32022	2.43484	3.31591	2.89822	3.74792	3.15441	3.44681	3.01769	2.72528	3.11863
6p21.1	NM_001134493	100188893	TOMM6	translocase of outer mitochondrial membrane 6 homolog (yeast)	1.04455	0.0628774	0.00535582	0.179481	51.4942	49.0781	78.305	66.5293	69.0954	62.2652	65.1295	72.319	76.0113	57.3505	62.447	65.7605	65.1126	62.9723	58.4595	60.6598	71.4142	65.2942	39.4733	36.7731	31.0391	55.6634	45.5879	57.4941	35.1175	45.8302	48.7083	60.6995	54.4543	50.9398	52.4241	46.2832	35.6809	70.7381	71.6447	67.9276	55.4577	57.1469	51.5224	53.57	48.0568
1q42.12	NM_152608	163859	SDE2	SDE2 telomere maintenance homolog (S. pombe)	1.10943	0.149817	0.00539561	0.179481	7.16064	5.72762	5.09165	6.32212	8.94472	7.36829	6.70515	5.79848	6.35599	7.11981	8.96746	6.24311	8.06218	8.60853	7.08602	6.93174	7.05979	7.08167	5.17277	5.68914	5.98033	6.56533	6.40754	6.61995	4.14228	3.26373	5.39562	6.55975	5.69377	6.20366	3.15518	2.61541	4.26604	6.65704	6.99204	6.04494	6.81785	5.68136	7.68426	5.08952	5.28875
10q25.3	NM_025015	259217	HSPA12A	heat shock 70kDa protein 12A	0.741562	-0.431361	0.00540612	0.179481	2.15697	2.24859	1.43452	3.1117	3.14549	3.06596	2.70792	3.19188	2.61363	0.999623	1.37179	1.26765	1.73823	1.91981	1.8013	3.45446	3.14546	3.65315	10.2372	10.8605	10.0077	4.85306	4.51359	4.27923	3.19779	2.66162	3.46015	2.58962	2.45761	2.64958	2.91528	2.49382	4.41046	2.36988	2.28479	2.56146	3.10135	3.40165	2.89074	4.64862	5.1419
4q12	NM_020722	57482	KIAA1211	KIAA1211	0.795225	-0.330565	0.00543781	0.179481	7.49852	7.22388	3.30253	8.79226	6.85949	8.59418	5.86418	5.30753	5.2261	3.69401	3.95925	3.75521	5.34171	7.14905	6.36527	4.88387	8.17637	4.54248	15.409	15.7398	15.9147	11.9871	10.9856	11.3176	10.2972	9.34054	8.90498	7.66635	5.39474	5.49002	5.19206	4.57238	8.0702	6.47364	8.02174	7.48703	5.67036	6.50775	6.59037	6.90777	7.68247
21q22.3	NR_026943	642852	LOC642852	uncharacterized LOC642852	0.86023	-0.217205	0.00545113	0.179481	4.88322	4.50158	2.67114	4.63807	3.67422	5.14503	5.89928	5.14635	5.70308	5.35077	5.40245	5.7384	3.82454	4.17692	3.81952	5.12742	5.15853	4.79391	10.029	11.2207	11.3436	5.36088	5.28254	5.05884	8.86624	6.94448	6.73489	6.5465	5.36096	5.83643	5.67919	5.31757	6.50721	4.85633	5.7377	4.51707	6.35863	6.70804	4.92041	4.9555	5.2444
6q23.2	NM_004865	9519	TBPL1	TBP-like 1	0.896825	-0.157102	0.00545683	0.179481	15.0462	9.48136	14.124	11.0059	9.56448	11.7423	15.1882	13.5643	12.9356	10.5749	15.1168	11.7068	11.2299	12.9721	14.479	17.9224	14.9373	13.8778	16.66	15.003	12.7579	13.8524	13.7083	15.7637	8.00457	13.4391	11.1305	17.4483	14.008	12.8585	13.3248	9.01075	22.6882	12.4526	13.5388	10.6445	15.2883	15.3829	16.7477	18.3262	12.75
19p13.1	NM_207518	5566	PRKACA	protein kinase, cAMP-dependent, catalytic, alpha	0.844934	-0.24309	0.00546338	0.179481	5.26177	6.46143	3.88386	10.7414	12.5844	11.4098	8.00991	9.58635	11.9083	8.59739	10.3683	15.2126	8.55508	9.75423	7.23512	10.3	13.1175	11.1898	10.2186	9.77641	10.2754	10.3738	9.79512	13.3739	12.7055	9.51413	10.7466	12.1226	12.4167	13.3379	21.7262	13.87	17.0966	13.9218	12.8433	15.0376	10.5438	12.0028	11.9309	9.85642	13.8823
7p13	NM_006555	10652	YKT6	YKT6 v-SNARE homolog (S. cerevisiae)	1.07811	0.108508	0.00546884	0.179481	25.3209	24.2328	21.628	29.8436	31.3069	32.7342	26.6556	27.2465	30.1927	23.688	22.7512	25.8389	27.2103	32.8979	29.6824	21.1566	35.1138	22.0779	28.168	27.5605	27.0209	19.2648	16.8552	21.0029	19.4056	22.5916	19.0856	20.9812	20.9371	21.3479	13.5011	15.5013	15.6433	25.5741	25.6247	23.8901	25.6749	21.3595	22.1701	19.9874	18.7731
13q12.11	NM_022459	64328	XPO4	exportin 4	1.11396	0.155694	0.00548254	0.179481	4.20144	2.94505	3.43121	4.0639	4.37402	4.36904	5.05072	4.54873	4.72604	4.3051	5.13804	4.24495	4.16658	4.35954	3.34404	4.87878	4.96833	5.71762	3.42899	2.89279	3.15002	3.29342	3.5654	3.80036	3.44352	3.14107	3.70506	4.52628	3.66257	4.18002	2.11292	1.7017	3.55495	3.99873	4.16513	3.99858	4.32163	4.49255	5.28462	3.5664	3.44027
20q13.33	NM_172109	3785	KCNQ2	potassium voltage-gated channel, KQT-like subfamily, member 2	0.672708	-0.571948	0.00548625	0.179481	12.5215	12.4541	18.4565	15.04	12.6299	12.1833	7.53708	6.82738	8.46641	0.990771	1.59024	1.75946	11.8199	12.7789	15.0751	12.6313	23.2862	12.7636	15.2494	12.3107	16.8661	7.75759	6.18973	5.65911	13.3326	24.3094	11.4619	8.00334	11.1495	15.9806	14.8172	16.1384	7.38441	8.58908	9.29667	9.14977	8.90596	13.9717	11.4698	8.99182	7.32773
1q22	NM_020131	56893	UBQLN4	ubiquilin 4	0.91953	-0.121032	0.00552242	0.180074	12.6426	12.2871	8.54556	12.0166	9.79795	11.7993	9.82828	8.59486	9.97636	10.8056	10.4188	10.945	8.06945	10.3534	9.91258	11.8128	11.5453	10.6112	11.7183	12.0874	12.8552	14.5233	11.6894	14.091	13.2582	11.0542	10.5686	10.0041	11.3169	12.4438	11.4342	13.9014	9.81223	12.6369	12.5395	12.0584	12.6404	12.4979	11.0655	10.0554	11.4383
17q21.31	NM_001144825	10900	RUNDC3A	RUN domain containing 3A	0.671436	-0.574679	0.00555132	0.180427	11.0005	10.8082	12.0607	9.56951	9.12321	8.56926	4.53052	3.37779	4.53593	0.957062	1.26348	1.25805	9.22252	8.81905	11.6235	3.8583	6.32866	3.76892	15.8207	15.377	16.755	10.9392	8.98291	9.49441	7.77957	9.37156	7.3639	6.492	8.09776	10.9847	8.01728	10.025	3.43344	7.37777	8.17781	7.56311	5.9765	6.9898	5.98096	4.92144	7.25606
4q28.2	NM_001278604	55132	LARP1B	La ribonucleoprotein domain family, member 1B	1.42037	0.506272	0.00570584	0.18412	4.92202	5.64559	6.41549	5.52088	5.16549	4.92067	2.92051	2.67487	2.94637	1.34077	1.68679	1.0689	5.46205	5.67428	3.98885	3.20132	5.50208	4.6813	2.46613	3.45748	2.68699	1.63109	2.055	1.60102	1.99472	1.41016	2.43167	2.67416	2.73763	2.77003	0.55027	0.477901	0.411918	3.09088	2.43413	2.54911	2.5081	2.15603	3.64461	2.14861	1.97305
17q25	NM_006937	6613	SUMO2	small ubiquitin-like modifier 2	0.974107	-0.0378485	0.00572495	0.18412	173.376	131.7	166.638	185.152	200.779	191.62	157.061	171.257	160.923	150.747	193.223	165.227	232.091	193.572	191.64	211.277	226.919	164.004	201.9	181.137	174.863	160.986	149.802	165.901	150.089	226.216	172.095	176.554	186.472	181.003	154.841	135.97	134.133	189.738	190.045	176.706	179.683	179.795	200.233	157.557	130.778
10q23.32	NM_152429	143282	FGFBP3	fibroblast growth factor binding protein 3	0.58402	-0.77591	0.0057386	0.18412	29.2087	20.8489	19.7262	11.0289	9.16567	11.1861	3.49638	2.34734	3.26973	1.03362	1.55597	0.877256	11.2029	13.3048	15.6545	14.166	10.1753	8.4169	15.3147	12.9174	14.1753	17.7246	17.2859	17.4198	13.4937	18.8508	17.6141	3.0232	3.04131	8.03538	3.57692	4.91782	6.13504	10.5188	19.1036	15.456	3.43799	5.96328	10.6641	9.74084	9.52698
1p36.22	NM_014944	22883	CLSTN1	calsyntenin 1	0.861713	-0.214721	0.00573877	0.18412	20.6742	19.085	15.6794	24.1538	22.3925	23.482	14.3126	15.006	17.8058	13.7521	15.387	15.1398	21.0585	18.9317	25.8461	15.316	15.9721	10.5838	37.1984	40.0179	46.8972	17.9729	14.0688	17.23	32.7459	36.3023	29.1467	17.4304	23.0582	24.1246	37.285	36.2243	23.5231	21.1976	24.0182	21.8773	27.0627	27.1731	23.9758	17.4703	23.226
3q28	NM_174908	152137	CCDC50	coiled-coil domain containing 50	0.837815	-0.255297	0.00576792	0.184255	4.03843	2.84405	3.0988	5.1356	4.87209	6.0148	4.00077	3.29188	3.78052	2.95478	3.22956	2.73674	3.75538	3.89108	3.58501	4.99158	6.75493	5.5756	7.36948	7.32937	6.5858	5.67246	6.05902	6.21158	4.78945	4.75357	5.01521	3.98306	3.95061	4.11911	2.3799	2.15605	4.39781	3.81661	4.2776	4.10283	4.45148	4.90266	6.85115	3.7416	3.24506
14q32.12	NM_005113	9950	GOLGA5	golgin A5	1.18692	0.247225	0.00577991	0.184255	17.2528	14.2732	16.8731	12.4127	17.4249	13.8388	13.6595	13.6738	15.0496	17.6127	22.1115	16.5677	15.2469	15.7208	12.2062	16.7864	17.3694	20.1105	11.724	12.0799	11.7371	11.1932	11.4522	12.1008	8.08982	5.02789	10.1973	15.7695	14.7897	14.1001	3.60132	3.71087	4.33614	14.6806	15.0496	14.1109	16.6046	13.8975	19.2154	11.3647	10.6073
1q21.3	NM_001255980	148327	CREB3L4	cAMP responsive element binding protein 3-like 4	0.708684	-0.496786	0.00583497	0.184393	0	0.000187	0.705806	2.38647	2.07125	2.87643	2.63849	1.76884	1.06041	1.1469	1.51196	2.26356	2.50309	2.33071	0.655754	3.11323	2.7374	4.3408	1.0919	1.04364	1.7639	2.30199	2.73362	2.86266	2.53006	2.17926	1.88591	1.8665	2.31249	2.93976	2.95539	2.75819	1.56906	2.67433	1.8882	1.4961	1.70879	4.22067	1.8964	2.02662	1.49789
19q13.41	NM_032423	84436	ZNF528	zinc finger protein 528	1.41808	0.503937	0.00584637	0.184393	2.65046	2.93013	2.10721	2.27659	2.80247	2.12177	3.08064	3.02839	2.84585	1.26955	2.42553	1.77223	1.46896	1.39842	1.04662	3.85058	2.06625	2.22588	3.89222	2.90311	3.51602	2.36897	2.32515	2.12896	2.06359	1.31934	2.23293	1.20363	1.24177	1.37069	0.825288	1.3091	1.78774	1.17716	0.947278	1.15606	2.07755	2.55985	3.18504	1.07553	1.2353
2q24.2	NM_001199135	10010	TANK	TRAF family member-associated NFKB activator	1.09657	0.133	0.00586902	0.184393	8.58352	6.60599	7.15913	6.94026	7.75862	7.30075	8.70896	8.0085	7.53661	7.05109	10.4887	7.49799	7.4836	6.05017	5.67334	8.83856	8.05466	6.79821	8.98999	7.23367	6.551	5.73149	6.58452	7.57078	5.54592	5.04913	6.99534	8.79647	7.81397	7.05677	3.53334	3.02606	5.67907	5.79641	7.61735	6.22887	8.33688	9.0791	8.73708	7.26363	5.89744
17q25.3	NM_001291324	57597	BAHCC1	BAH and coiled-coil domain-containing protein 1	0.788785	-0.342295	0.00587611	0.184393	3.03538	3.62065	2.07853	3.75019	2.65266	3.31534	2.20577	1.8649	2.41699	1.59524	1.31682	1.7126	2.15687	2.3202	2.50966	2.75567	2.5855	1.86806	3.11709	3.26343	4.27199	3.64589	2.87987	3.09985	4.03262	2.93597	3.13437	2.55897	3.56252	4.2963	5.50264	5.20049	2.8856	3.83919	3.83626	4.46748	2.74006	3.45213	2.67157	2.4335	3.54826
14q12	NM_014169	29082	CHMP4A	charged multivesicular body protein 4A	1.12091	0.164668	0.00589488	0.184393	13.2318	9.66651	12.6526	8.16652	10.429	8.69129	10.7172	9.91283	10.396	10.6555	11.0593	10.3979	9.06548	11.7979	8.95415	11.0007	9.98118	11.2671	10.6497	10.1038	10.0738	9.07138	9.70864	9.05768	6.07684	6.49003	8.10918	9.25581	11.2495	11.4679	4.93866	4.34997	6.24982	9.93979	10.1819	8.87239	10.844	7.74391	9.62456	6.463	5.95426
21q22.13	NM_000411	3141	HLCS	holocarboxylase synthetase (biotin-(proprionyl-CoA-carboxylase (ATP-hydrolysing)) ligase)	1.19574	0.257906	0.00589509	0.184393	2.74469	2.5216	1.60855	2.59087	2.28589	2.44698	2.94246	2.468	3.50065	3.20452	3.4256	2.79405	2.03266	2.50906	1.99642	2.60495	2.8199	3.19912	2.39596	2.11713	2.40628	2.53885	2.39788	2.92568	1.79364	1.45405	1.83259	2.90343	2.2153	1.72225	1.20035	1.50171	3.1465	2.4331	2.84036	1.91337	2.9046	2.42094	2.54097	2.21758	1.96331
5q34	NR_024356	345630	FBLL1	fibrillarin-like 1	0.627571	-0.672149	0.00593126	0.184944	9.94325	10.6705	11.5289	14.1243	13.9659	12.0612	5.17435	5.60881	3.84549	0.873003	1.12701	1.08658	11.496	11.8371	11.2641	3.46963	7.24795	3.38981	25.5488	22.6124	27.8751	6.31286	5.1962	6.63398	15.0234	20.1083	12.4577	8.31483	9.41513	14.2259	10.3036	11.2668	4.23511	8.94446	7.90081	9.99621	7.51983	10.7715	8.15019	7.32989	8.96791
19q13.32	NM_004491	2909	ARHGAP35	Rho GTPase activating protein 35	0.892027	-0.164841	0.00604782	0.187991	12.0067	12.6124	6.42423	12.8938	10.6775	12.2205	12.3752	11.2583	10.1491	10.0283	10.6918	9.61278	9.14965	11.7961	10.6701	12.1508	13.2793	11.7703	20.9084	21.8933	23.1549	13.7376	12.9642	12.7733	14.1459	10.3995	11.6584	13.6971	12.0429	12.6849	8.82287	8.48779	11.9644	10.9341	12.5407	11.3662	12.7578	12.7758	13.0579	11.651	13.1594
Xq22.2	NM_199478	5354	PLP1	proteolipid protein 1	0.67699	-0.562794	0.00611382	0.18836	12.452	9.49669	10.5405	12.2602	21.68	18.0725	8.4871	10.6929	7.53646	1.20404	2.33277	0.893487	15.3651	17.2234	8.33866	13.3575	22.2338	26.1479	19.3612	18.4097	16.6953	11.4599	9.96549	10.6018	8.70844	8.70834	18.7147	6.99129	6.27849	8.631	13.9988	10.2661	25.0352	12.6398	12.5185	8.79945	12.9459	13.4911	15.5854	8.6038	4.27559
13q12.13	NM_199138	219287	AMER2	APC membrane recruitment protein 2	0.666874	-0.584514	0.00612609	0.18836	4.93369	2.75403	1.73321	2.23599	1.80364	2.07632	1.16055	1.02096	1.68676	0.254723	0.658367	0.773222	3.47826	3.63412	4.75446	1.45521	3.52626	1.1557	5.64554	5.8939	4.03822	1.09297	1.18834	1.25262	3.93204	4.23823	5.3287	3.36296	3.05007	3.17672	1.29307	1.13069	2.65725	1.74701	2.19318	2.50805	1.59071	2.11593	2.22614	2.25914	2.49935
2p23.3	NM_002254	3797	KIF3C	kinesin family member 3C	0.720926	-0.472078	0.00616025	0.18836	23.8609	23.3019	12.2659	16.462	13.3842	17.1265	8.73372	6.62364	7.07162	2.95343	3.36483	3.27079	14.9814	18.6791	21.2819	6.21669	11.8336	7.12548	42.7188	44.4317	47.6983	13.0843	10.1031	10.9228	18.0806	14.6797	16.6526	12.0204	10.4956	11.9097	13.102	11.8214	10.896	12.4379	16.1407	14.0888	9.07809	12.9962	11.8694	11.6625	16.388
Xq22.2	NM_001142423	9643	MORF4L2	mortality factor 4 like 2	1.1034	0.141958	0.00616445	0.18836	48.6805	40.3495	47.5275	43.5775	52.6865	59.7994	74.4836	71.465	65.8911	46.1863	55.6762	44.0227	48.2221	49.7744	40.2641	44.7556	47.5668	54.232	37.4465	33.8729	28.9526	27.9582	34.058	37.1606	16.8225	21.6449	28.1415	45.6679	41.8578	43.0782	11.7287	11.6909	35.7014	36.1651	50.5172	43.802	55.659	38.516	56.6956	58.0661	35.3508
12q22	NM_019094	11163	NUDT4	nudix (nucleoside diphosphate linked moiety X)-type motif 4	0.682122	-0.551897	0.00616679	0.18836	1.65443	0.687371	1.33561	1.75749	1.33313	0.720393	1.71743	0.873198	1.46785	1.30279	1.7732	3.21444	3.08648	4.03955	2.82693	3.31742	2.36709	3.57547	3.22028	2.41899	2.54305	8.60903	7.15359	9.17527	0.564022	2.29047	3.55445	2.43674	1.70352	1.86248	1.55719	2.18103	4.89368	2.14504	2.42634	1.96042	1.62368	1.31321	1.26634	1.8482	1.15684
9q34.3	NM_206920	158056	MAMDC4	MAM domain containing 4	0.766668	-0.383327	0.00617296	0.18836	1.94707	2.35009	2.0038	1.82244	1.54659	1.94199	1.63956	1.20605	2.19953	2.05547	1.19846	1.96989	1.37047	0.972128	1.39554	2.28715	1.24128	1.65506	1.71914	2.36199	2.68343	2.80131	2.89041	3.06386	4.13796	1.22592	2.51413	2.71602	2.52166	3.11948	4.61385	4.3241	2.39178	3.26977	2.58358	2.97278	1.77536	1.90833	2.25621	2.09633	2.88557
3p25.3	NM_016821	4968	OGG1	8-oxoguanine DNA glycosylase	0.752549	-0.410142	0.00619689	0.188514	1.26307	0.739305	1.32931	2.07904	1.27557	2.3159	2.22202	1.70545	2.96344	1.15152	1.39424	1.79815	2.74408	1.20619	1.11005	1.10615	2.54307	3.34131	2.03634	2.4703	2.0952	3.07753	3.12911	2.73964	2.64285	2.52178	2.04346	3.04537	3.32304	3.28898	2.53824	3.69574	2.20105	2.7847	3.53243	1.77944	2.87213	2.43794	1.0565	1.79615	1.59574
19q13.12	NM_181786	284459	HKR1	HKR1, GLI-Kruppel zinc finger family member	1.19486	0.256845	0.00624373	0.188821	6.46687	6.86615	6.20622	7.91232	9.18444	7.95591	9.16964	8.15362	8.95138	9.68288	9.72903	9.60503	8.63408	8.82847	8.13468	9.10862	8.17424	10.1027	5.41088	6.03553	6.05566	7.43162	8.77987	8.43494	6.69454	3.63739	5.76167	9.34278	6.58852	8.0518	1.65942	1.90629	4.79105	7.98035	8.76187	7.17518	9.33554	9.21427	8.04888	7.46157	6.95222
2q33.3	NM_001037663	1933	EEF1B2	eukaryotic translation elongation factor 1 beta 2	1.09376	0.129295	0.00624483	0.188821	174.887	120.607	173.817	114.491	180.93	146.642	216.139	253.539	181.538	308.833	346.986	297.848	190.103	171.882	132.099	207.024	146.29	257.342	127.162	101.074	94.138	120.447	127.385	119.303	77.8819	59.6193	87.558	319.033	273.279	264.983	42.7865	50.6052	110.895	164.329	134.28	126.789	238.334	179.273	211.298	118.442	86.0894
6p21.2	NM_001271641	23787	MTCH1	mitochondrial carrier 1	0.948106	-0.0768792	0.00629228	0.189681	58.4388	49.5787	62.612	49.9202	50.7391	41.0225	42.2822	42.5299	44.0957	47.6749	48.9099	52.872	58.8031	59.3141	61.0116	50.9752	51.3307	37.2913	51.6502	51.0832	53.4467	57.02	45.4034	58.1353	48.7961	55.9217	50.4158	40.0882	49.382	54.5001	73.0192	75.2824	43.4011	58.7124	60.5205	56.2376	55.6246	59.0874	38.7453	56.5292	54.7484
5p14.2-p14.1	NM_006727	1008	CDH10	cadherin 10, type 2 (T2-cadherin)	1.34821	0.43105	0.00632936	0.190224	2.85662	1.96833	2.77028	2.28953	2.80522	2.70074	2.3065	2.42911	1.94284	6.38825	6.38681	4.91572	1.75698	1.91743	1.39424	2.64324	1.90193	2.61433	2.84118	2.91287	2.86692	1.30678	2.0907	1.4432	1.60919	1.55643	2.56059	3.10949	3.94341	3.23003	0.781472	0.816481	1.08112	2.36955	1.76992	2.65649	3.36987	2.06013	2.96493	1.52043	1.53344
1q42.12	NM_022735	64746	ACBD3	acyl-CoA binding domain containing 3	1.15615	0.209324	0.00637064	0.19089	15.22	10.2035	8.98574	12.1589	16.3967	15.1433	14.917	15.4444	13.5649	20.6286	24.0743	19.7646	16.4709	16.6798	11.5134	18.5845	17.3253	20.1388	9.30625	10.5124	10.9177	13.0186	12.292	14.2741	7.34985	6.70226	10.268	15.3252	12.7031	12.2977	4.26059	3.67977	5.78702	13.9558	14.9346	13.4085	14.7352	11.6659	18.5733	12.2763	9.22454
4q34.2	NM_201591	2823	GPM6A	glycoprotein M6A	0.6159	-0.699233	0.00640682	0.190906	82.4557	66.1669	78.182	12.9901	16.4701	10.9819	13.8969	5.46689	8.3946	0.560346	3.25319	2.32226	59.5771	56.8494	53.3941	12.1812	23.3698	8.66659	80.378	76.778	65.0489	10.1861	11.0386	10.5472	26.5037	25.0695	43.0325	34.4732	23.7673	32.993	6.84885	8.49338	11.425	13.1405	17.0242	17.5148	8.00006	17.1474	18.4334	14.0202	18.872
14q23.1	NM_002788	5684	PSMA3	proteasome (prosome, macropain) subunit, alpha type, 3	1.11151	0.152517	0.00640945	0.190906	25.2547	15.6086	23.7405	24.209	37.4953	32.2625	34.9324	34.3913	35.8873	27.2182	33.2934	28.2208	37.8313	30.0194	20.7399	29.5578	35.8324	33.8194	26.9795	18.6346	18.2539	18.3784	23.7727	22.1244	14.1637	11.1839	16.9635	29.5853	24.3085	27.9392	8.34988	7.12533	11.9382	24.6408	22.6319	20.3659	32.0842	25.3038	30.1781	26.0132	19.9111
7q22.1	NM_152892	222229	LRWD1	leucine-rich repeats and WD repeat domain containing 1	0.836331	-0.257854	0.00648011	0.192199	7.66709	8.32485	10.3503	12.3709	10.0715	9.83083	10.1689	12.3901	11.5343	6.44854	8.0618	8.98356	9.70226	9.65824	10.9017	6.01768	10.2348	10.2134	13.0538	12.7787	13.5844	9.04864	8.19735	9.25786	9.00977	11.0397	7.45231	10.0117	11.3124	13.7395	24.7353	22.1298	9.89227	14.7806	15.6188	16.0685	13.5307	15.1332	8.60127	13.7327	14.6404
Xq28	NM_013364	29944	PNMA3	paraneoplastic Ma antigen 3	0.80026	-0.321459	0.00649736	0.192199	2.61991	2.45526	1.99131	2.12162	1.99804	1.82743	1.2974	1.42256	1.61472	1.62089	1.95617	2.34982	2.01386	1.79293	2.0667	2.19878	2.41963	2.43689	3.88709	5.00827	4.53246	1.57662	1.98194	1.89441	2.11334	1.68627	2.09103	2.39976	2.3437	2.96191	1.77788	1.97979	1.61379	3.54703	3.37711	3.72259	2.66913	2.83884	1.73496	2.93364	3.66642
12q24.23	NM_002567	5037	PEBP1	phosphatidylethanolamine binding protein 1	0.934753	-0.0973423	0.00652017	0.192199	100.369	100.213	110.734	121.283	107.187	114.626	108.263	108.621	112.741	57.2585	65.5832	67.5005	114.552	145.383	144.822	109.471	133.863	103.496	218.107	202.934	180.706	117.737	103.753	116.686	105.299	132.526	111.365	103.832	87.2141	95.4565	91.0755	87.7526	104.44	102.995	117.403	91.9924	89.075	95.2606	85.2219	113.448	105.692
12q15	NM_002392	4193	MDM2	MDM2 oncogene, E3 ubiquitin protein ligase	1.09399	0.129596	0.00653622	0.192199	10.9614	9.04555	8.22477	11.3327	11.224	10.8456	13.1433	12.4424	11.5271	13.9041	17.0126	12.2835	11.059	12.4591	10.9401	10.8608	6.92515	8.44153	7.97323	8.31028	8.22741	10.2607	11.5199	10.9654	7.69219	7.90961	9.0407	12.416	10.205	10.8913	6.62234	6.6207	7.38215	10.3711	10.8011	9.94942	13.0844	12.875	12.5932	10.1652	8.68726
20q13.33	NM_001958	1917	EEF1A2	eukaryotic translation elongation factor 1 alpha 2	0.780623	-0.357302	0.00654917	0.192199	113.502	119.253	112.103	66.4239	60.7852	54.1393	30.3673	25.8537	28.3321	7.57508	8.6772	10.3569	81.8459	77.9168	101.853	21.0757	58.5346	26.1707	93.3173	87.7778	101.651	48.1306	36.7189	46.6181	55.6956	67.6614	56.5075	38.2838	41.9886	55.6534	53.1992	66.5046	27.5514	53.303	60.3584	58.973	39.8526	51.9865	46.5011	42.3929	48.4978
6q14.1	NM_001010844	134728	IRAK1BP1	interleukin-1 receptor-associated kinase 1 binding protein 1	0.818911	-0.288221	0.00660174	0.192691	1.8098	1.50088	1.56828	2.38895	2.18238	2.85216	3.52489	3.64673	3.3445	1.82992	2.2595	2.28459	2.67074	2.61092	2.83618	3.19881	3.98122	3.58156	1.42198	1.55142	1.76472	3.12901	3.28116	3.19149	3.03044	3.53647	3.12216	4.0196	3.2712	3.21823	2.89487	2.24784	5.40547	2.8477	3.34894	2.97284	2.67399	2.43748	2.86911	3.13213	3.16826
7q22.1	NM_015908	51593	SRRT	serrate RNA effector molecule homolog (Arabidopsis)	1.18018	0.239003	0.00662106	0.192691	7.14962	7.18214	5.08871	6.08751	7.7404	7.12581	5.95872	6.8817	10.0012	8.47949	5.68459	6.08278	5.26588	8.92716	5.92744	4.34005	7.51444	4.68102	6.18903	5.63978	5.87763	7.91754	6.83767	4.39426	3.96967	4.66311	5.04637	7.86298	6.15909	5.74659	5.27004	3.13254	7.1737	8.36516	4.97264	4.85078	4.96346	3.97172	5.49766	4.39109	5.29781
14q23.3	NM_022474	64398	MPP5	membrane protein, palmitoylated 5 (MAGUK p55 subfamily member 5)	1.2807	0.356933	0.00662523	0.192691	5.3453	4.18024	4.50539	6.57422	7.89781	7.69343	7.7979	8.29176	7.14012	12.9487	17.1595	14.5215	7.86504	6.48929	4.37634	9.07264	4.35147	8.90058	2.42155	2.94876	2.26018	8.97036	9.18914	9.99531	3.80796	2.92263	5.53312	8.88172	6.64975	8.40406	2.54095	2.75957	4.42272	8.18027	7.92708	8.01897	7.07276	8.30211	8.91855	5.44556	5.90897
22q13.1	NM_004711	9145	SYNGR1	synaptogyrin 1	0.821915	-0.282938	0.00664319	0.192691	11.1091	10.6025	12.1678	11.3983	11.2123	10.5479	7.44799	6.96751	7.45842	5.02745	5.27355	5.7206	10.1071	9.80959	11.7341	5.64577	8.09084	6.54934	14.1848	15.6178	16.6261	10.8636	9.07286	10.0575	11.0196	11.7528	11.3935	7.76614	9.38284	12.4627	17.7651	16.3654	7.78383	12.1183	12.2463	13.3132	9.12543	11.9979	9.08376	11.8046	13.1115
4q12	NM_001079524	10606	PAICS	phosphoribosylaminoimidazole carboxylase, phosphoribosylaminoimidazole succinocarboxamide synthetase	1.10396	0.142691	0.00675128	0.195069	32.1093	24.1693	30.2167	28.8488	35.5112	31.4654	37.5223	34.0805	39.3566	33.7743	39.8626	31.1475	32.9515	30.2906	18.8748	40.6111	38.3849	35.1538	29.2469	24.0811	24.6199	14.8871	21.8643	21.4034	20.6617	19.6238	24.4787	28.583	30.9896	33.8473	12.5956	9.9846	14.1297	29.9112	29.629	28.762	33.8522	33.8034	37.9903	20.166	18.871
19q13.11	NM_014717	9745	ZNF536	zinc finger protein 536	0.728927	-0.456153	0.00676426	0.195069	7.24018	7.89819	7.04323	6.14789	6.30011	5.90287	4.356	3.43585	3.79802	0.739693	1.09	1.46571	4.06478	4.99869	5.55147	5.03899	9.41073	4.12456	8.58203	7.76202	8.48545	6.08693	5.84841	5.52825	7.51021	7.75015	6.94229	3.68399	4.51492	4.98357	7.10766	6.4433	6.17586	4.63595	5.12282	4.54185	4.80309	5.52304	4.99176	5.21697	5.17049
5q33.3	NM_024007	1879	EBF1	early B-cell factor 1	0.63898	-0.646158	0.00680531	0.195687	0.527955	1.04577	0.000346	4.44518	2.80321	4.48185	1.66732	0.99647	1.02541	0.000283	0.764663	0.376696	9.3e-05	0.981755	0.694113	3.65681	4.02027	2.90796	6.29722	5.38153	5.72121	2.11655	2.7747	2.51314	3.23204	3.41172	5.97023	2.85113	2.55009	2.46339	2.42266	2.18964	4.37642	1.1906	1.80925	1.55206	2.30537	3.27302	3.89525	2.74874	3.1102
9q34.3	NM_001606	20	ABCA2	ATP-binding cassette, sub-family A (ABC1), member 2	0.774733	-0.368229	0.00693657	0.198888	5.39189	6.72588	4.87067	6.69139	5.66601	5.99415	3.91964	4.53892	5.58192	3.28446	3.07753	2.20085	3.77612	4.59858	5.39954	2.52873	4.97084	3.78548	6.15958	7.54303	8.19548	6.4921	5.22822	5.09496	7.5492	6.67666	6.33465	5.36705	7.60254	8.90225	15.7304	13.2027	7.42418	7.77982	7.17941	6.61062	6.89491	7.30239	6.06913	5.94516	7.53704
2q24.2	NM_005805	10213	PSMD14	proteasome (prosome, macropain) 26S subunit, non-ATPase, 14	1.15098	0.202862	0.00696952	0.199261	30.7465	22.5427	34.6677	22.9378	26.8976	21.7065	28.3574	27.4488	28.2088	18.2634	25.5589	20.7029	26.0115	25.0837	16.6431	25.0827	27.7412	27.4418	24.0045	18.823	20.3397	17.881	18.1879	17.6498	12.1268	8.02031	14.6464	23.2472	20.7245	21.4749	6.28102	7.45368	6.57878	19.6121	20.0443	17.4337	26.1274	22.548	28.1105	15.4627	15.4313
19q13.32	NM_018215	55228	PNMAL1	paraneoplastic Ma antigen family-like 1	0.871469	-0.198479	0.00704189	0.200309	20.5506	18.1119	14.5883	23.605	17.218	21.112	21.3592	20.4242	20.5408	10.4943	12.1838	11.921	13.8632	18.6941	17.4765	12.2469	19.5441	15.9641	31.4531	32.1019	28.2165	23.5727	23.6605	24.4063	20.656	23.7089	23.0691	24.9766	18.8601	19.3993	16.3438	14.7509	27.722	19.0152	22.5145	16.6333	21.2397	21.4395	19.1604	26.0638	26.9214
21q21.1	NM_006806	10950	BTG3	BTG family, member 3	1.11328	0.154822	0.00705148	0.200309	28.241	19.6819	24.7862	17.3754	19.1132	17.3151	17.3501	18.1928	19.7229	10.393	16.464	14.913	18.1183	16.8666	19.0331	12.6265	20.5107	17.0684	8.28297	6.80651	6.40626	12.1111	11.8353	13.1268	10.6353	15.3431	15.9471	14.9668	15.5189	16.1849	6.80972	6.50078	13.1666	19.4003	20.0383	15.5097	17.2639	17.2384	26.9662	16.4843	13.0417
6p25.1	NM_001143971	9425	CDYL	chromodomain protein, Y-like	1.18777	0.248257	0.00706641	0.200309	7.57292	4.89079	7.35269	8.77558	7.64876	7.51112	6.50126	7.44608	8.8052	8.41091	9.01198	8.88643	6.42927	10.2294	7.13168	8.04628	7.46756	7.2261	5.79637	4.72806	5.41652	8.44615	6.68104	9.01715	5.464	5.28494	5.78292	6.66412	5.33538	3.97284	2.18212	2.47834	7.2321	7.38641	7.66434	5.17508	6.08422	5.66891	10.0756	6.22683	3.35365
14q23.1	NM_206852	6252	RTN1	reticulon 1	0.698986	-0.516664	0.00710525	0.200638	87.9799	63.0776	59.2325	56.9405	55.7276	57.9054	28.6232	23.7403	22.4721	2.67971	5.43596	4.64165	60.4375	59.1137	76.943	22.578	38.1362	20.7485	187.589	184.698	176.669	23.1737	17.5097	17.0014	53.9628	80.5342	66.3982	32.2816	32.0038	34.3502	33.8379	26.6081	26.0596	36.9687	46.1825	34.5262	29.9927	52.7101	39.5457	40.5155	49.5916
3p21.1	NM_014366	26354	GNL3	guanine nucleotide binding protein-like 3 (nucleolar)	1.17451	0.232056	0.00711824	0.200638	25.817	18.1751	25.7013	18.8266	27.9766	25.1166	22.8947	20.3851	20.1091	28.8192	31.8692	26.6662	35.3895	37.5981	29.5946	29.5913	26.4521	29.4851	18.3687	14.2909	14.4175	14.499	16.2794	14.0952	10.9378	9.30016	12.2463	25.2296	22.8944	20.928	6.5216	5.70135	9.40543	24.7657	22.3716	21.4889	22.7666	16.3669	26.1834	12.1346	9.29253
15q11.2	NR_003331	100033428	SNORD116-16	small nucleolar RNA, C/D box 116-16	0.855548	-0.225079	0.00717397	0.201639	2691.5	2957.26	3190.62	1144.48	1773.65	832.712	867.266	1194.72	760.023	645.566	1823.23	703.494	1659.35	903.733	926.66	489.989	760.512	1629.44	2052.19	2593.6	4232.33	3952.7	5248.88	5562.23	2170.32	1318.94	1320.17	3320.06	4359.13	1998.4	2883.58	3569.44	1333.54	2874.22	2749	2475.67	1035.35	1883.59	2131.72	1729.61	1915.94
19p13.2	NM_016264	51710	ZNF44	zinc finger protein 44	1.28588	0.362752	0.00723803	0.202486	2.51471	2.29136	2.20958	2.02998	3.08	2.67466	2.06198	2.59018	2.6304	2.01151	3.29756	2.27924	3.43742	3.25858	2.67599	1.11594	0.986993	1.03797	1.85915	1.45617	1.76251	2.21872	2.15795	1.89945	1.73443	1.14844	1.86497	2.41765	2.86017	2.41924	0.869936	0.763075	0.956992	2.03072	2.11568	2.30536	2.84015	2.06421	2.39812	2.06346	1.47802
19p13.3	NM_130853	5802	PTPRS	protein tyrosine phosphatase, receptor type, S	0.878618	-0.186693	0.00725075	0.202486	55.3688	63.4657	49.8795	62.2082	47.0456	53.0279	34.742	26.9821	30.2355	18.9449	20.0914	20.5791	44.9753	43.1337	54.333	27.2826	43.4774	26.3742	52.0528	59.5889	62.8403	38.7692	37.2679	35.3226	59.569	65.5799	53.8124	38.0997	46.5225	53.0757	53.8455	58.257	35.7484	42.1376	53.0957	53.3982	43.9421	52.8599	42.3532	34.0086	48.1628
20p12.3	NM_001200	650	BMP2	bone morphogenetic protein 2	1.36899	0.453114	0.00726499	0.202486	1.46304	1.49628	1.35653	2.50843	2.8421	3.15494	6.72569	7.62375	7.6667	5.46799	6.01764	5.69527	3.06024	2.38097	1.6763	3.33366	2.4661	2.48592	2.23003	1.4267	2.20375	1.91681	2.27589	2.48785	1.80183	1.39325	1.68714	4.52615	5.53361	3.95374	1.44897	0.87098	1.57226	4.02781	3.16711	2.38351	5.79288	3.597	2.99118	4.25438	3.1836
15q24.3	NM_032808	84894	LINGO1	leucine rich repeat and Ig domain containing 1	0.712381	-0.489279	0.00733431	0.203365	3.05899	4.2501	4.62841	7.05299	5.15273	3.11922	6.06476	5.12328	6.75725	2.07222	3.00246	0.000447	4.62068	5.21256	6.43399	5.64052	2.75515	3.93025	5.73908	6.39328	6.35422	7.05281	5.50925	6.52816	2.38576	3.60252	2.80624	6.52091	8.2489	6.72524	10.0646	6.63369	4.04752	6.58735	5.67734	6.50327	7.34689	6.62276	4.44759	10.1101	11.1472
7p13	NM_015983	51619	UBE2D4	ubiquitin-conjugating enzyme E2D 4 (putative)	0.901932	-0.148909	0.00734205	0.203365	2.55455	2.10921	1.74518	2.65797	2.37138	2.77496	2.51434	2.13876	2.72079	1.72835	2.03624	2.18099	2.58731	3.03131	2.57232	2.4219	2.88673	3.04708	3.7145	3.52149	3.6674	3.17941	2.47105	2.9563	2.81931	2.5627	2.65546	2.17246	2.12542	2.44405	2.76526	2.25168	2.99891	2.37085	2.32397	2.35918	2.6807	2.39866	2.304	2.50108	2.14429
15q21.1	NR_125376	100419583	LOC100419583	n/a	0.811209	-0.301855	0.00737943	0.203365	3.7359	3.54103	2.06755	6.2657	7.34712	7.91794	11.1806	9.07574	9.59692	5.38508	6.35295	5.37589	6.23257	7.87745	6.7711	9.84397	7.69356	8.92807	15.513	14.7269	13.2153	7.14787	7.23695	7.19054	6.72808	7.61236	9.41148	7.68147	6.24198	5.92074	3.63883	2.97165	7.17593	6.7043	7.81398	5.69742	8.69436	8.49309	10.8764	9.80283	8.35235
7q34	NM_001244584	100996928	C7orf55-LUC7L2	C7orf55-LUC7L2 readthrough	1.24463	0.315712	0.00739494	0.203365	7.83441	5.30938	6.93405	5.24485	6.81732	6.15349	8.38123	7.78563	8.59676	5.74423	9.17639	7.46077	5.37941	4.80963	4.0599	7.05829	10.8975	8.39774	6.34836	5.67698	3.24509	7.27559	6.88049	6.92754	4.33664	1.76415	3.86112	6.23867	5.2862	4.82529	3.13138	1.97458	2.65113	6.95372	6.00488	4.9116	6.49481	4.80981	8.57351	5.30609	5.6734
10q26.13	NM_212554	399818	METTL10	methyltransferase like 10	1.13464	0.182233	0.00739841	0.203365	4.77478	3.1542	3.52304	4.61368	5.25708	5.71582	5.306	6.07642	5.67284	4.94685	5.3285	4.86944	4.86517	4.6635	4.11887	4.55002	6.45013	5.34183	5.56857	5.10942	4.73645	3.16893	3.85962	3.46948	3.16095	3.86758	4.21864	5.2847	4.71497	4.35358	2.46933	1.97821	4.51283	4.45509	4.02577	3.91173	5.46665	4.56097	5.57338	3.08775	3.31265
22q11.21	NR_003563	728233	PI4KAP1	phosphatidylinositol 4-kinase, catalytic, alpha pseudogene 1	0.753508	-0.408306	0.00749686	0.203925	3.13384	4.18287	2.32667	3.5399	3.33109	3.83835	2.98746	2.74168	3.71417	3.9855	2.657	4.32357	3.28518	3.15875	3.33311	6.27804	6.50196	5.39411	6.53203	7.70111	7.55295	6.20647	5.5921	4.97485	5.62975	2.57229	4.59439	4.30188	3.40619	3.57328	6.5394	5.52829	4.67196	8.40683	8.10353	8.85364	2.16072	2.08341	2.30484	7.47551	9.18178
11p11.2	NM_003654	8534	CHST1	carbohydrate (keratan sulfate Gal-6) sulfotransferase 1	0.699455	-0.515696	0.0075036	0.203925	2.5426	3.16847	1.96466	3.24999	2.66415	3.05381	1.29273	1.22826	1.05807	0.882425	0.548141	0.830358	1.8937	1.86946	2.23177	2.95302	3.73545	2.16504	5.107	5.54876	6.06203	1.66217	1.29071	1.69285	3.63226	3.42197	2.70047	4.22751	4.56098	6.16323	2.46602	2.62587	1.22652	2.64565	2.29353	2.63563	1.92358	2.51116	2.47749	2.10144	2.05622
13q12.2	NM_000982	6144	RPL21	ribosomal protein L21	1.06497	0.090808	0.00752641	0.203925	288.19	335.25	274.758	603.705	455.637	430.414	422.934	502.831	729.969	541.191	330.323	433.783	236.597	645.253	613.517	222.138	709.26	388.134	76.9761	256.019	86.7478	282.995	245.277	341.458	130.424	568.126	292.169	275.792	368.189	289.176	146.911	159.072	240.707	304.751	212.667	298.307	483.058	284.467	246.602	261.95	197.99
12p13.33	NM_003324	7289	TULP3	tubby like protein 3	1.16058	0.21485	0.00753637	0.203925	6.87496	5.55004	5.22569	7.19717	7.60897	8.84599	9.16619	9.69493	8.69699	9.96225	10.4537	10.5824	6.43727	8.6052	6.2779	11.9071	10.8804	10.4001	5.14791	5.06053	4.44734	7.61773	6.9093	8.61374	5.27991	4.72174	5.20115	9.43614	8.45833	8.15923	2.13813	2.28702	7.25717	8.12951	9.44166	7.70347	5.95618	5.27538	5.73256	7.17501	7.14602
14q13.2	NM_002791	5687	PSMA6	proteasome (prosome, macropain) subunit, alpha type, 6	1.04979	0.070098	0.00753773	0.203925	57.9139	47.7028	65.2678	79.3618	74.7599	82.9512	78.7293	79.5114	80.8632	55.7109	63.3478	64.4289	70.0058	86.0665	79.078	58.0878	90.8913	66.7668	59.1613	57.0155	49.9418	46.139	42.1142	46.0081	44.9256	69.8402	43.9451	56.1393	54.2761	52.9518	35.0908	37.6227	39.0328	63.7218	68.7884	57.0702	57.7199	57.2602	57.7839	51.5426	46.6391
14q24.3	NM_006029	9240	PNMA1	paraneoplastic Ma antigen 1	0.871419	-0.198562	0.00754143	0.203925	31.2902	26.041	18.1306	30.4887	24.4158	28.1731	25.5497	22.1651	24.2003	11.5877	13.5782	14.0871	26.6262	32.8676	34.9885	21.8554	26.4019	17.0071	38.5839	39.626	41.9451	20.5257	18.9895	20.6744	35.2976	36.5033	33.0216	21.5186	21.1286	21.0242	27.0178	23.2406	28.7909	24.9181	27.6245	25.456	21.1162	25.6426	24.9832	32.5487	34.2316
Xq26.3	NM_003413	7547	ZIC3	Zic family member 3	0.670334	-0.577049	0.00757374	0.204245	9.82323	7.26156	6.40501	6.34541	4.91333	6.62092	12.6451	8.53845	11.6595	0.657667	1.68498	1.55223	4.25708	4.77877	4.21294	6.39749	13.5994	6.74671	18.5665	18.0004	18.1259	4.78686	5.24711	5.62908	12.1414	12.77	13.8785	9.09295	8.90786	9.0686	5.36762	4.32173	6.62839	5.26637	6.61499	5.72318	6.5244	8.72626	8.82144	9.97556	11.1793
3q26.1	NM_001122752	5274	SERPINI1	serpin peptidase inhibitor, clade I (neuroserpin), member 1	0.691082	-0.533072	0.00767645	0.206457	2.85347	2.31001	4.24523	2.01025	2.99323	3.01164	1.56552	1.09061	1.22101	1.10771	1.76376	1.43917	3.63615	2.9274	2.77847	3.51857	3.82329	2.58725	8.85412	8.03977	8.6853	3.922	4.59601	4.41815	2.0441	2.76347	3.54025	5.2302	3.27906	5.05495	1.29578	1.53864	1.52884	1.76155	1.6121	1.35947	3.31834	4.09593	5.08412	2.89112	2.10805
9q33.3	NM_002799	5695	PSMB7	proteasome (prosome, macropain) subunit, beta type, 7	1.05693	0.0798791	0.00770954	0.206757	39.1562	34.2295	38.3237	48.9851	47.1784	47.3133	49.3663	55.7307	56.9964	42.5567	44.0964	44.1418	48.1216	54.324	46.2155	42.6535	59.9264	47.0113	40.4643	38.488	37.0423	38.4108	32.2779	35.5899	27.9001	42.8136	25.8232	44.1771	45.6803	43.2502	26.5167	29.1689	27.1429	37.7006	40.4381	31.0584	41.9722	30.9411	33.7453	33.3815	34.8919
5q35.1	NM_017785	54908	SPDL1	spindle apparatus coiled-coil protein 1	1.26931	0.344041	0.00772906	0.206757	4.40397	3.90948	4.00269	4.97002	5.70021	5.14135	6.90972	7.67507	5.84609	9.62485	11.9965	9.04853	7.41695	6.13891	3.89815	8.95389	7.09017	9.77942	3.29966	3.31585	3.98175	4.2972	3.98298	3.61209	3.16555	2.18214	4.00049	6.65216	6.06547	7.07561	1.88519	1.90884	1.84963	5.32102	5.70965	4.70524	8.17566	5.32618	6.63192	4.10685	3.2701
19q13.42	NM_032430	84446	BRSK1	BR serine/threonine kinase 1	0.73041	-0.453222	0.00778285	0.207551	22.9871	25.0234	22.0519	20.3593	19.4813	19.0156	11.1239	8.7054	11.2922	3.20154	2.73387	4.01562	17.4309	15.161	18.3758	8.91361	16.5158	7.18155	37.5772	38.513	39.8133	13.2856	10.8975	12.3189	22.4102	21.9242	20.3421	13.5244	15.8328	18.926	24.8885	23.0595	9.32579	16.4241	18.1043	19.2383	12.4707	18.5056	13.754	15.2302	18.5393
16q24.1	NM_021149	23406	COTL1	coactosin-like 1 (Dictyostelium)	0.91342	-0.130649	0.00780592	0.207551	25.2487	23.9651	21.9651	34.0726	33.8964	29.6334	29.3833	33.082	31.243	17.3256	17.2707	17.6234	31.8471	31.7564	32.648	29.5779	27.6606	23.2739	34.5405	31.4325	32.0303	25.1822	21.5299	23.5234	24.4917	30.2263	20.8206	23.1577	24.4458	29.8445	48.0093	41.6762	28.2636	30.3292	32.3939	29.142	32.9533	28.7862	23.0667	31.3718	30.914
17q21.33	NM_018509	55379	LRRC59	leucine rich repeat containing 59	1.08867	0.122561	0.00783877	0.207551	23.8017	25.049	18.7631	34.7895	32.4461	38.9608	29.0093	30.38	35.576	38.9283	38.5636	43.0033	38.7561	48.6608	42.5616	23.6289	35.1037	22.3895	25.5103	24.6959	23.5782	24.0625	20.3143	25.3499	21.7416	21.6417	22.4611	30.5425	28.8654	26.2607	17.0121	18.4189	22.3472	33.0051	33.8739	28.7094	30.8967	22.5275	24.7764	23.1579	19.3694
19p13.3	NM_001040134	5064	PALM	paralemmin	0.809964	-0.304071	0.00784285	0.207551	34.7925	39.2507	34.9579	29.3432	29.6466	30.3165	16.9445	15.7457	15.1833	7.96192	8.29524	10.4476	23.4357	26.9668	28.1822	10.3812	22.9259	13.173	43.805	38.9605	47.6675	25.5486	19.4079	23.896	29.9252	35.281	28.9931	19.6821	26.1903	34.1822	39.7881	36.8683	17.6835	30.7073	31.4629	31.431	20.4955	30.9625	24.5058	27.1617	25.9082
7p11.2	NM_014302	23480	SEC61G	Sec61 gamma subunit	1.05525	0.0775858	0.00788745	0.207551	85.5451	57.1879	81.7904	118.457	122.139	123.101	147.986	147.376	152.656	115.114	129.048	117.634	135.938	126.054	121.407	77.3986	134.3	104.189	88.5115	83.6376	71.5666	53.0861	49.358	54.068	68.6	88.0681	88.8788	109.059	98.7273	90.3488	52.4186	43.8524	62.733	112.116	102.262	81.1528	110.322	82.109	109.417	87.5939	79.4315
19p12	NM_004720	9170	LPAR2	lysophosphatidic acid receptor 2	0.854491	-0.226863	0.00789994	0.207551	9.78548	11.0631	8.7007	9.82699	9.05683	9.10536	8.19743	6.50681	8.79811	5.60113	4.82734	5.41201	7.63007	8.90694	8.3172	9.24524	9.09146	9.46745	10.3473	10.8794	12.369	7.31392	6.7727	6.67699	12.9025	9.04987	9.8309	8.78159	10.2486	12.5242	12.5727	12.0534	6.34738	9.26683	11.1132	12.3228	9.75551	10.0563	9.22851	8.68472	10.0072
16p13.3	NM_153350	146330	FBXL16	F-box and leucine-rich repeat protein 16	0.69481	-0.52531	0.00791591	0.207551	3.96884	5.40718	4.4306	5.23735	4.01886	3.70651	1.67941	1.52587	2.00953	0.36731	0.403351	0.577934	2.42126	2.22813	3.45026	2.01221	3.93706	2.71757	6.94836	6.34329	8.57583	3.28602	2.50087	3.11881	4.34954	4.20924	3.20794	2.71753	3.4902	3.71	6.32572	4.6192	2.18901	3.66243	3.77368	4.08227	2.48162	4.3018	3.05714	2.94476	3.84512
2q24.3	NM_018086	55137	FIGN	fidgetin	0.730804	-0.452443	0.00792514	0.207551	1.84785	2.5724	1.50904	3.25365	2.56064	3.66991	2.32503	2.37275	1.64578	2.5714	2.749	2.03484	1.1133	1.69894	0.724813	4.18113	5.67118	6.17103	4.03584	5.10532	4.87791	5.68103	6.63921	5.08554	5.53513	3.2696	5.52499	4.1527	4.40736	4.9768	2.31073	2.18848	3.19373	2.77454	2.35818	2.6084	4.15465	4.01839	4.61707	2.00047	2.96071
19q13.31	NR_033341	100379224	LOC100379224	uncharacterized LOC100379224	1.26118	0.334771	0.00799191	0.208752	4.19477	2.85716	2.59886	2.8044	2.635	2.43451	3.49636	3.10743	3.47692	2.9829	4.24716	3.47174	3.20437	2.30577	1.64495	3.98133	2.0179	3.83656	2.05578	2.56902	2.45788	3.0631	2.99281	3.67462	2.20791	1.22379	2.95958	2.67659	2.77587	1.96944	0.922823	1.0335	1.16682	2.59612	2.79193	2.46267	3.34562	3.53586	3.12165	2.79664	2.80839
16q24.2	NM_024735	79791	FBXO31	F-box protein 31	0.809907	-0.304172	0.00805276	0.208847	5.38671	5.12414	4.4166	2.82883	4.01856	3.00517	4.0279	3.39235	3.15639	2.31755	2.78611	4.43607	2.87611	4.9479	3.99489	1.74962	3.26761	3.93285	6.12385	5.11336	6.57929	6.33596	4.74369	5.21798	5.47375	3.75952	4.1592	4.76831	5.04971	5.51992	6.67278	6.17114	4.50636	5.74294	5.03536	5.92289	2.86167	5.83363	4.66504	3.86709	4.21258
16p13.12	NM_002582	5073	PARN	poly(A)-specific ribonuclease	1.17388	0.231282	0.00805361	0.208847	7.82356	6.8183	7.92944	5.89891	5.93109	7.44499	6.04354	7.51061	8.61991	7.93576	7.30749	7.00155	7.71804	6.7087	4.30595	9.64437	10.812	9.44846	4.6559	5.66073	5.83762	5.18521	6.31219	4.11309	4.91453	3.80587	5.79926	6.15812	7.12565	7.89607	2.3126	1.89981	4.26439	5.11826	6.30927	4.61264	5.68409	7.90462	8.69879	5.70807	4.96877
18q22.3	NM_014177	29090	TIMM21	translocase of inner mitochondrial membrane 21 homolog (yeast)	1.18959	0.25046	0.00805833	0.208847	9.23243	6.74324	9.24375	7.17405	9.53485	8.01375	8.50622	8.7889	8.76309	8.27743	10.1587	7.66892	9.66348	9.48787	7.16698	10.5637	7.73327	9.56823	9.15495	7.4636	8.30335	5.07888	5.41476	4.83366	4.2151	3.30008	4.99113	8.73636	8.0167	8.70383	2.81827	1.79132	3.3762	6.5639	6.00974	5.65249	7.46315	8.37814	9.04081	6.75281	6.62622
12q14.3	NM_032338	84298	LLPH	LLP homolog, long-term synaptic facilitation (Aplysia)	1.18159	0.240728	0.00810283	0.209456	7.4289	5.3427	6.74989	8.90411	12.3985	9.86084	8.15305	9.25804	9.80834	11.2513	14.0713	12.8316	15.2105	13.4242	10.2859	11.6268	7.78006	8.14783	7.27073	6.34589	6.09483	10.2006	9.67351	9.51767	4.328	3.935	5.43213	10.1843	8.93497	8.70913	3.35271	3.19186	3.96313	7.21753	6.4562	6.99385	9.45481	7.89612	9.63292	6.73863	5.51398
19p13.3	NM_001270366	79948	LPPR3	lipid phosphate phosphatase-related protein type 3	0.776809	-0.364369	0.00813439	0.209728	19.0774	22.8903	23.0547	26.6737	24.3488	23.4684	15.7393	15.8999	17.7452	4.21056	4.85939	4.91992	15.8487	16.9042	18.7422	16.066	18.294	14.6274	30.0614	26.5368	44.6308	14.9862	11.1465	13.2455	19.1933	20.7884	15.7067	17.4748	20.9575	28.7431	24.3769	23.6803	10.1024	21.8613	21.7873	20.5091	18.5756	26.1303	14.4706	18.8428	18.8999
17q25.3	NM_000918	5034	P4HB	prolyl 4-hydroxylase, beta polypeptide	1.05962	0.0835501	0.00827676	0.212849	98.6075	121.358	116.507	145.733	171.173	164.071	168.805	193.503	206.496	242.368	220.127	257.198	129.354	142.041	114.274	160.984	188.433	131.829	77.3116	74.1081	75.8756	125.239	107.373	126.241	108.325	96.0225	92.5331	171.062	191.821	184.393	167.305	160.287	114.612	186.409	171.793	153.194	230.132	163.616	128.125	108.213	84.1193
3q21.2-q21.3	NM_017836	54946	SLC41A3	solute carrier family 41, member 3	0.880992	-0.1828	0.00834088	0.213947	13.626	13.7397	15.3924	14.2275	12.3167	10.6474	12.6802	11.4311	11.5638	8.66027	8.78678	9.12033	10.3638	10.3541	9.9799	9.73487	10.6601	10.4483	15.5348	13.7605	16.1971	15.3505	13.1372	16.1376	13.8278	13.8678	12.0848	9.87888	12.8337	14.7676	22.2095	20.4613	13.4366	14.7872	14.0906	15.5705	16.3006	16.0384	14.7621	14.3366	13.6722
16p11.2	NM_004604	6810	STX4	syntaxin 4	1.21469	0.280589	0.00836745	0.214078	5.4315	4.69968	2.56624	4.24782	3.84048	4.4786	5.40023	5.36482	7.36818	8.6663	8.38695	9.85825	4.10159	5.06149	2.3186	4.10295	5.075	5.11472	3.86401	4.23719	3.45252	6.60635	5.76903	6.57811	3.2168	3.86246	4.113	5.13633	4.0011	4.58338	3.68977	3.39765	4.28802	6.44295	6.14913	4.50809	4.26394	3.1526	3.99484	4.82561	3.89281
19q13.41	NM_001101372	402665	IGLON5	IgLON family member 5	0.779734	-0.358945	0.0084347	0.215247	6.40166	8.48123	5.42478	12.8357	10.684	11.7183	6.29894	5.37605	6.4143	2.82496	2.37237	3.02727	6.07394	6.96173	6.64671	5.66927	10.3432	4.58526	10.9719	10.2615	10.9553	7.84469	5.83226	7.3945	8.19928	5.96379	7.16254	6.70061	7.25859	9.24853	15.6292	12.4728	7.16268	9.15763	8.97547	7.72277	8.00519	11.046	8.03277	8.24127	9.71336
12q13.13	NM_002136	3178	HNRNPA1	heterogeneous nuclear ribonucleoprotein A1	1.06682	0.0933158	0.00849903	0.216151	235.798	172.544	164.946	221.798	280.711	276.336	279.984	308.493	268.723	318.521	352.951	300.895	245.779	236.197	165.078	350.87	325.68	408.101	151.907	151.542	156.078	206.714	173.147	165.753	129.194	102.462	151.608	248.445	275.153	279.498	75.689	72.3627	63.1078	211.886	213.234	204.142	297.368	235.092	308.707	133.321	108.505
5q14.1	NM_003664	8546	AP3B1	adaptor-related protein complex 3, beta 1 subunit	1.22952	0.29809	0.00851347	0.216151	4.9573	5.47691	6.668	6.29503	7.59633	6.02664	10.2444	9.79308	10.1614	11.9268	14.9989	11.5864	6.60433	5.89986	4.30235	12.2322	9.21551	11.4987	5.44773	3.90399	5.04772	7.31872	7.94279	6.80991	4.07924	2.83892	5.46241	8.98824	8.68224	8.22931	2.15029	2.32391	3.67028	6.01985	6.85913	6.32641	12.3605	10.537	12.4741	5.72923	4.38194
8q12.1	NM_001011671	79145	CHCHD7	coiled-coil-helix-coiled-coil-helix domain containing 7	1.30554	0.384644	0.00853575	0.216167	1.95336	2.51056	1.43539	3.70758	3.51579	2.69309	3.86501	4.39138	4.87072	2.94656	3.64517	3.74629	1.64295	2.61194	2.77497	2.21373	2.0662	4.67997	2.97337	2.22212	1.29004	1.48574	1.87066	1.61227	2.168	2.92564	1.32403	3.81323	3.60299	4.25428	0.603876	1.49927	1.25501	2.50903	1.92625	2.06054	3.89033	3.99483	3.94155	3.37065	2.96288
12q13.13	NM_016057	22818	COPZ1	coatomer protein complex, subunit zeta 1	1.03531	0.0500696	0.00861788	0.216718	42.9337	40.6205	46.9608	55.6895	59.1796	56.2385	67.8386	70.8751	70.1306	65.0817	81.1135	68.9862	58.2209	60.5646	54.7381	44.949	63.9394	51.0761	39.7283	40.7497	36.9316	46.8082	39.6356	45.2402	41.2148	47.539	45.2469	60.0889	64.3881	57.4287	42.7574	40.7478	44.9538	63.3057	59.5631	48.7926	59.5548	54.6434	54.7609	56.1913	55.6157
16p12.1	NM_145080	197370	NSMCE1	non-SMC element 1 homolog (S. cerevisiae)	1.20551	0.269647	0.00864522	0.216718	16.2909	12.4424	18.2432	16.5471	18.8646	15.6426	18.6584	21.6234	22.7502	22.7424	28.5551	26.8166	18.4756	23.6272	20.2416	14.9074	16.1407	13.0767	16.7158	14.7475	13.3033	22.4567	21.4882	23.0834	8.79438	11.42	12.0779	27.1063	22.5866	28.6382	3.49207	3.81687	7.78944	11.5042	12.8926	10.7927	22.8262	23.3129	19.3967	15.7119	9.86783
3q27.2	NR_038322	9175	MAP3K13	mitogen-activated protein kinase kinase kinase 13	1.39219	0.477357	0.00865721	0.216718	6.39141	3.9752	5.44958	8.30541	6.66988	7.89442	8.82381	10.9752	10.5413	7.30837	8.83772	8.28074	7.72571	8.44783	7.47495	7.48982	11.7195	8.6001	4.58988	4.81218	4.591	6.31353	5.60021	7.05268	1.2566	1.26619	0.734215	7.7595	5.7759	6.59919	1.80147	1.15604	2.49635	9.05318	8.15888	6.10124	7.52381	7.4319	7.48044	8.17389	5.38959
4q35.1	NM_032991	836	CASP3	caspase 3, apoptosis-related cysteine peptidase	0.832138	-0.265105	0.00874009	0.216718	11.9634	9.19581	12.7697	10.1874	15.8999	11.3365	6.69679	5.57111	7.27094	3.94244	9.03573	9.18613	14.4598	11.4228	8.84008	13.4422	20.4645	18.8396	14.2626	10.711	9.59541	13.141	13.5864	12.5481	7.79479	9.24579	12.3731	13.5494	12.9203	13.092	4.12711	4.06817	7.54837	12.4069	12.9558	10.6893	11.8507	12.2413	14.9431	9.9588	7.23226
11q12.2	NM_006133	747	DAGLA	diacylglycerol lipase, alpha	0.823675	-0.279853	0.00874411	0.216718	1.70721	2.046	1.31472	2.02596	1.93361	1.811	1.49247	1.20128	1.45328	1.23857	1.18244	1.14918	2.42578	2.80509	3.09235	1.34178	1.97114	2.09012	2.37278	2.86651	3.35544	1.6895	1.39093	1.64714	3.00129	1.88894	1.54077	1.7992	2.17048	2.77319	3.16626	2.94316	1.54121	2.42571	2.42206	2.64633	1.90079	2.01028	1.49852	1.32308	1.20874
4q31.23	NM_138364	90826	PRMT10	protein arginine methyltransferase 10 (putative)	1.18594	0.246036	0.00874467	0.216718	3.56443	3.69711	3.47676	2.83209	3.65583	3.99523	4.8096	4.35015	4.2437	3.65068	4.14734	3.25729	3.42816	3.4519	2.54385	4.34763	4.62564	4.91068	3.53712	3.36162	3.50055	3.15653	2.98606	3.00358	2.6696	1.65383	3.36228	4.73923	3.70277	3.43867	1.47565	1.18659	1.32711	3.35664	3.80768	3.40312	4.33497	3.95001	3.63844	3.50482	3.1507
4p14	NM_000661	6133	RPL9	ribosomal protein L9	1.06337	0.0886374	0.00874847	0.216718	1256.86	1028.13	1684.54	1380.02	1430.66	1468.55	1450.36	1630.09	1547.19	1523.81	1562.15	1610.58	1552.03	1732.38	1658.26	1251.81	1542.37	1425.98	880.57	754.102	625.856	1250.91	1137.53	1207.95	859.907	1357.97	1043.69	1335.37	1219.8	1160.72	683.309	779.02	641.928	1533.25	1428.54	1306.25	1310.44	1411.45	1588.91	1040.77	786.014
12p13.31	NM_014718	9746	CLSTN3	calsyntenin 3	0.828105	-0.272114	0.00876256	0.216718	15.4327	16.0665	12.3854	17.7583	16.12	15.6734	14.2274	12.5839	14.4528	6.16244	6.61619	7.5268	13.1189	13.5154	13.7975	10.4308	14.0461	8.68392	23.5791	22.5806	25.7382	14.754	13.2579	15.3797	17.8079	16.7044	16.6439	13.8095	15.5914	17.8687	26.586	23.1967	14.3969	17.4046	18.661	19.2675	13.1788	17.2032	12.3514	20.5353	22.4046
20q13.12	NR_038339	100505783	OSER1-AS1	OSER1 antisense RNA 1 (head to head)	0.734965	-0.444253	0.00879002	0.216718	3.38728	2.72231	2.48639	2.94175	2.93078	1.28312	1.56511	1.5384	1.36734	1.28025	0.89025	1.45441	2.24536	2.1321	3.6707	3.08276	2.71194	1.79495	3.15276	2.35311	1.09121	3.46483	3.06939	3.10674	2.137	5.46367	4.26186	2.73286	3.62537	3.42438	2.1075	1.09354	1.18196	2.86244	2.80225	2.44352	2.22923	3.50165	3.41333	1.83681	2.80487
17p13.1	NM_133491	112483	SAT2	spermidine/spermine N1-acetyltransferase family member 2	0.931945	-0.101683	0.00879968	0.216718	42.3401	35.7839	54.2793	39.5179	36.4236	32.513	31.248	32.6779	35.5406	30.829	36.1793	38.2331	47.4697	33.5193	46.1302	30.1059	32.9129	30.6778	30.7545	33.5246	29.8261	53.8627	46.896	56.7865	35.1851	42.0238	35.8045	34.5463	37.2439	42.4064	63.0033	63.8545	35.0853	43.1973	48.1193	44.4967	41.1504	41.6166	39.8267	44.4828	48.3121
11p15.1	NM_005013	4925	NUCB2	nucleobindin 2	1.17662	0.234646	0.00883813	0.216718	20.2767	15.7961	20.3813	15.6514	27.1531	21.0968	28.4495	30.0563	24.6522	30.3873	47.7831	33.208	27.6373	18.7854	13.9558	33.0642	21.9155	36.1176	11.6782	11.0023	11.7859	20.4126	20.7402	21.5542	8.41629	5.56171	11.1423	36.8832	35.663	29.5202	10.2608	8.28246	8.56352	23.7269	23.9551	20.0015	32.2562	23.9811	29.6101	16.162	12.831
17q11.2	NM_001288634	55731	FAM222B	family with sequence similarity 222, member B	0.723989	-0.46596	0.00887636	0.216718	1.30387	1.49399	1.30325	1.94457	2.06316	2.95533	2.42942	1.42715	1.31247	2.09264	0.851972	1.27231	0.547548	1.01702	0.784225	1.89382	3.25176	2.01665	2.44466	2.73018	2.64451	5.1863	2.00688	3.93106	4.15104	2.87007	2.38007	2.31725	2.03134	2.21994	5.03135	3.34019	3.57484	2.59485	3.18682	4.05135	3.27658	3.17969	1.78708	1.15334	1.32701
6q22.33	NM_001012279	387104	SOGA3	SOGA family member 3	0.664277	-0.590142	0.00890906	0.216718	14.1276	11.579	7.81515	8.49468	7.1078	7.61696	3.65101	2.7676	2.98135	0.596228	1.2898	0.830113	7.26597	8.16755	8.07458	4.70157	7.37207	4.53709	21.7994	21.9263	22.8266	4.61234	4.36592	3.55265	9.97972	9.04053	12.031	5.53156	5.07079	5.58433	3.66515	3.7272	4.07265	5.46844	7.03207	6.50593	5.5802	8.40763	8.59091	6.16006	8.13702
17p13.1	NM_001970	1984	EIF5A	eukaryotic translation initiation factor 5A	1.06094	0.0853409	0.00892544	0.216718	48.9093	46.3768	51.9057	49.9213	51.1843	47.0099	56.949	70.2803	81.582	64.0362	57.912	66.0028	42.3412	54.2684	51.0304	39.5999	59.4916	45.0258	42.2089	33.5522	43.9877	31.3312	32.4213	37.8038	35.3959	34.8925	31.8545	51.1359	64.3772	74.6615	54.2981	61.8569	36.9738	44.119	56.9181	50.5406	77.9389	47.1908	30.9595	44.3495	37.238
17q21.31	NM_198475	284069	FAM171A2	family with sequence similarity 171, member A2	0.892588	-0.163933	0.00892583	0.216718	21.8821	23.7693	23.6693	25.7304	24.581	20.9343	22.6352	21.6373	22.0801	13.6386	12.9738	15.6769	21.623	24.9396	28.6519	19.7548	16.9799	16.8654	26.8551	26.8454	29.4962	32.5196	25.321	30.9847	16.6944	16.7349	15.0536	20.0968	18.2742	25.4257	35.2084	31.5173	19.0816	24.1638	23.5524	26.5176	20.0439	24.2587	18.4102	30.7902	27.857
16p13.11	NM_033201	89927	C16orf45	chromosome 16 open reading frame 45	0.708195	-0.497782	0.00892633	0.216718	32.8574	30.007	28.4898	27.82	26.0235	26.6182	18.9998	18.0042	16.5599	1.76798	3.31963	2.90535	23.3347	24.774	29.2045	12.9221	24.233	17.1154	45.9627	43.1412	44.5677	35.1837	27.0561	30.0321	27.4936	31.3303	26.4464	14.2466	15.9629	16.8387	28.3979	29.5236	14.0575	16.9737	20.7868	17.7619	15.1947	19.065	15.7485	19.5563	21.2015
14q21.3	NM_001001	6166	RPL36AL	ribosomal protein L36a-like	1.09747	0.134185	0.00892676	0.216718	81.0444	70.6961	99.8555	105.917	148.249	136.29	130.459	131.367	130.326	176.732	199.048	182.717	153.132	162.071	120.147	161.392	117.658	129.499	73.8974	57.9305	56.1455	90.1996	102.802	103.987	35.9339	47.9066	54.2246	137.111	118.967	123.925	27.8391	41.3289	69.3614	114.364	101.646	87.5039	150.544	118.28	133.194	89.8924	73.6628
3p12.1	NR_047469	100846978	LINC00506	long intergenic non-protein coding RNA 506	0.790255	-0.33961	0.00896534	0.217127	4.07353	4.47354	2.85981	3.40618	3.05418	2.79068	2.22928	2.3488	2.81664	3.48275	2.78812	1.99222	3.31554	2.65937	2.50862	4.26223	2.47636	5.03596	5.47643	7.08426	6.06066	3.77867	4.20385	2.62226	8.96096	4.18741	7.325	2.63585	2.8453	2.95261	3.66811	2.96307	4.19265	2.64414	3.78234	4.48767	2.92121	3.64116	3.93411	3.13055	7.0838
12q21.33	NM_001946	1848	DUSP6	dual specificity phosphatase 6	0.794446	-0.331979	0.00904161	0.218444	3.25446	2.48138	2.76284	4.30572	4.76703	4.79506	3.54776	4.70338	4.09113	2.08226	2.09343	1.84273	4.28653	5.68235	5.10842	6.66671	6.68229	6.50207	5.4868	5.06348	6.36892	3.31482	2.31094	3.01265	3.3845	3.1715	2.61115	5.52533	4.19224	4.85822	5.03539	3.56838	6.33011	8.12959	7.45692	6.17959	4.40282	4.19414	4.66563	4.00916	3.25817
11q12.1	NM_001300727	23220	DTX4	E3 ubiquitin-protein ligase DTX4 isoform 2	0.852737	-0.229828	0.00907391	0.21867	9.46367	10.1324	5.01181	15.0188	10.4828	12.7611	10.1674	6.69439	9.55979	5.92865	6.12634	5.38858	8.95474	10.921	9.26122	9.76815	13.5798	7.65218	15.5872	18.2012	16.3865	10.1676	11.2826	11.85	15.0592	12.8178	13.2048	9.05005	9.40372	9.67183	10.3316	8.09246	9.3938	9.87089	9.12222	9.24833	9.65101	8.20677	10.3698	9.13386	12.3921
6q21	NM_015891	51362	CDC40	cell division cycle 40	1.15586	0.208964	0.00909483	0.21867	5.30296	3.88559	5.23347	5.71101	5.8986	5.15806	6.14052	5.85541	5.92183	7.5819	9.60903	8.09721	4.91704	4.86304	3.74536	7.18263	6.59602	7.45172	4.63487	4.20424	4.43514	4.7314	6.00129	5.77748	3.58544	3.01501	5.05292	7.27169	5.66714	6.40275	2.47145	2.02108	3.12547	5.61968	6.32442	5.03835	6.17691	5.6561	7.04159	5.37873	4.49697
15q14	NM_152594	161742	SPRED1	sprouty-related, EVH1 domain containing 1	0.896158	-0.158175	0.00918829	0.219715	5.96781	3.23904	3.23115	5.426	5.3128	6.45131	5.84124	6.34001	5.74358	5.63326	6.38787	5.17959	6.16908	6.37402	5.7638	7.38641	6.58398	7.25908	6.76171	6.69162	5.89785	4.53396	5.87138	4.83221	6.48263	6.36688	7.92728	7.42699	6.33831	6.02391	5.12601	4.35692	8.92011	5.90575	5.58995	4.77957	6.68779	6.2264	7.38393	5.70415	5.03787
15q21.3	NM_207037	6938	TCF12	transcription factor 12	0.744605	-0.425452	0.0091976	0.219715	15.8053	12.6825	13.4953	12.8983	13.7134	15.1626	11.5879	6.1581	8.61193	3.19647	5.7425	1.97245	7.23708	7.41182	7.83169	20.1112	13.928	12.6907	23.679	21.05	18.9044	12.5029	17.5723	15.8741	19.8717	18.5791	23.3113	8.44582	8.66831	10.4908	7.55264	7.77774	15.276	11.3665	13.5025	9.93253	10.1904	14.4078	20.5952	13.4616	9.97846
9p13.2	NM_012166	26267	FBXO10	F-box protein 10	0.874995	-0.192653	0.00925132	0.219715	3.43185	3.51807	3.11537	5.63897	5.00359	5.81336	3.83567	3.78884	3.72988	5.00734	5.44817	5.99097	4.07856	4.54676	5.01333	5.46263	4.53211	4.93192	4.50894	4.43164	5.01192	6.90401	5.42338	6.54081	6.33792	5.76156	4.18595	5.10828	5.62465	6.57555	7.85073	7.15978	5.84828	5.82553	5.90223	5.64075	5.52426	5.57481	4.62276	3.49201	4.04755
3p25.3	NM_183352	6396	SEC13	SEC13 homolog (S. cerevisiae)	1.05079	0.0714701	0.00926489	0.219715	57.0821	59.0138	63.3399	84.6418	89.918	87.48	92.8041	104.181	111.074	113.771	100.776	116.177	88.0019	103.064	90.9701	83.0558	100.109	82.8703	43.6242	40.947	40.306	67.9338	61.663	71.138	51.6488	48.2844	52.1599	86.7675	84.8102	77.6605	62.5879	69.6895	54.091	93.2644	86.6803	85.0163	75.2425	71.6132	54.5742	69.6767	60.4934
9p13.3	NM_006368	10488	CREB3	cAMP responsive element binding protein 3	1.07916	0.109906	0.00931048	0.219715	21.3788	24.6084	21.934	26.5679	28.0599	25.7377	26.2824	27.3276	31.805	19.137	21.2891	22.8653	25.0857	24.7208	25.0476	19.6069	27.6736	15.2694	21.3281	18.2664	19.3675	17.1981	14.9559	16.5893	16.578	18.8134	15.8447	20.0338	21.7083	20.7679	21.4646	23.961	13.0665	25.6246	26.6083	23.7761	22.7249	20.599	15.2349	19.41	21.2476
7q34	NM_003143	6742	SSBP1	single-stranded DNA binding protein 1, mitochondrial	1.0776	0.10782	0.00934034	0.219715	28.8956	23.9172	35.6377	28.5962	40.4792	39.2485	38.6817	45.1614	45.5358	35.9235	47.8261	41.2494	41.6346	47.0328	35.733	43.724	48.1321	41.4781	28.4472	26.5288	21.4455	25.1093	28.8294	30.195	19.1902	32.0586	23.6074	37.9882	37.3178	33.4458	17.7302	13.6968	25.7918	30.9893	29.4364	22.0309	37.7382	29.174	32.2653	26.4804	20.3916
3q27.2	NM_021627	59343	SENP2	SUMO1/sentrin/SMT3 specific peptidase 2	1.14083	0.190087	0.00935956	0.219715	9.8746	7.95852	7.7154	9.34324	11.3072	10.4284	10.1764	10.2334	9.3238	10.6697	14.6093	11.2424	10.969	10.0845	7.62201	11.1034	11.9728	13.7021	8.1056	9.18968	10.162	10.6285	10.2256	10.6336	6.66365	4.67253	7.23077	10.1089	8.86388	8.275	2.98574	3.15505	4.71202	9.05403	8.57433	7.94057	11.0908	9.1982	11.6762	7.45375	7.42517
17q24.2	NM_014405	27092	CACNG4	calcium channel, voltage-dependent, gamma subunit 4	0.73393	-0.446285	0.00936119	0.219715	15.8491	16.7212	13.2881	18.6027	14.3983	16.5567	11.1193	9.6849	10.0479	2.11999	3.19927	3.02092	12.2086	11.4136	13.3861	9.84294	11.5898	7.24116	22.4799	22.7002	26.5113	8.36182	6.6943	6.62975	15.1293	16.6197	13.2749	10.5438	12.9067	15.4569	25.2136	23.011	12.7216	13.7412	13.8112	14.9846	10.957	16.2747	12.4157	13.5649	17.2384
14q12	NM_016106	23256	SCFD1	sec1 family domain containing 1	1.13067	0.177173	0.00936491	0.219715	12.4984	9.06019	11.8073	9.77624	11.9906	10.0308	14.6973	17.8929	14.706	17.9169	22.5774	16.7963	9.92018	9.41477	9.86869	14.6863	16.1531	17.9781	10.7039	9.58262	8.74029	9.49757	10.3047	11.93	8.26376	7.61366	9.96943	15.2326	16.4504	12.808	4.52692	4.6231	9.77793	12.8342	11.8123	12.001	17.439	14.3941	16.2119	11.871	8.53714
1p35.1	NM_023009	65108	MARCKSL1	MARCKS-like 1	0.862682	-0.2131	0.00937711	0.219715	112.804	132.221	123.327	90.7289	92.5613	89.7591	53.9381	48.9387	70.0951	23.7827	17.6548	21.755	69.6573	66.172	70.8773	66.2006	84.1935	43.9633	110.159	91.2395	153.345	60.8092	50.3672	62.6555	79.8987	126.598	74.2171	66.2462	88.7745	119.274	110.887	120.329	41.9958	72.0003	84.7424	81.6728	59.9753	83.1134	66.1704	55.8159	53.7826
1q22	NM_001093725	92312	MEX3A	mex-3 RNA binding family member A	0.826226	-0.275392	0.00938051	0.219715	12.7081	14.481	10.334	14.6239	12.3668	15.2989	10.0988	8.33529	8.49803	4.60646	5.17652	4.42693	10.7783	11.032	10.451	12.3291	13.0282	11.8702	15.6329	15.7452	18.2458	10.2092	10.0691	9.54652	14.6588	13.5796	11.7766	9.99182	10.8224	13.9102	12.9335	11.5699	9.46772	13.1519	13.2032	13.3652	11.5357	12.7962	13.3276	6.76281	10.1488
19q13.4	NM_001136135	6158	RPL28	ribosomal protein L28	1.06052	0.0847688	0.00950119	0.220956	100.173	100.84	145.986	129.375	160.212	149.485	150.124	165.392	175.239	172.829	147.686	166.996	123.513	136.809	157.535	106.017	130.299	157.514	56.8754	59.5974	62.4418	147.277	116.1	124.857	77.3182	129.706	69.4655	127.772	161.011	180.887	111.184	152.217	68.1283	114.285	112.555	91.1785	171.066	121.713	101.401	68.9661	53.9699
8q21.3	NM_018710	55529	TMEM55A	transmembrane protein 55A	0.870339	-0.200351	0.00952086	0.220956	7.21468	4.86745	4.74883	7.79229	8.08376	6.84321	8.10159	7.40278	7.06732	4.69344	4.93557	5.68682	5.19742	6.09141	6.42333	6.31693	7.59289	7.393	10.2746	9.64863	9.3174	9.7606	10.1226	11.9339	6.81782	7.89802	8.36668	5.92237	5.39881	5.37402	6.93564	4.70577	8.35595	7.1911	7.80638	7.17242	6.92774	8.36419	8.50133	9.62926	9.55121
2q31.2	NM_001145412	4780	NFE2L2	nuclear factor, erythroid 2-like 2	1.19852	0.261259	0.00954059	0.220956	7.04587	6.06991	6.49241	5.24186	7.47229	4.95078	7.91086	6.50815	7.84018	8.45577	9.75958	6.0404	3.68527	4.29706	3.88631	8.08889	6.354	9.79764	3.48611	3.53839	3.68018	5.92237	8.63081	8.95869	4.48203	2.62075	5.20889	5.99606	7.00401	5.77528	2.25168	1.97589	4.43416	6.37668	7.93069	6.99853	8.99634	8.27866	9.07232	6.41771	5.60499
16q23.1	NM_032268	84937	ZNRF1	zinc and ring finger 1, E3 ubiquitin protein ligase	0.831037	-0.267016	0.00955251	0.220956	5.83118	5.98856	5.85789	6.24593	5.29045	5.52839	4.45932	4.1005	4.57588	2.67593	2.92599	3.10622	6.3355	5.12557	5.44451	4.49107	4.93348	3.70013	9.19107	9.33808	10.7953	4.56869	3.61204	4.6261	5.63406	5.89546	4.99738	5.14697	5.64307	6.71658	8.82029	7.2716	5.65727	5.95013	5.90886	6.0045	5.23095	5.32965	4.51598	4.81642	5.50795
9q33.3	NM_030978	81873	ARPC5L	actin related protein 2/3 complex, subunit 5-like	1.13157	0.17832	0.00955907	0.220956	12.8612	8.49674	9.03471	11.8321	11.8766	12.1824	9.23553	11.5815	11.8976	11.1017	12.4614	11.6354	13.8947	20.1586	14.1966	11.3769	9.86697	9.75454	11.4556	10.1853	10.3474	8.15269	8.45574	11.5026	6.15815	7.02944	8.76797	10.3985	7.67191	8.49713	4.55172	3.81727	5.51477	9.51769	9.12865	7.60144	10.5628	7.45381	9.66858	10.1708	9.12721
17q25.1	NM_002766	5635	PRPSAP1	phosphoribosyl pyrophosphate synthetase-associated protein 1	0.902657	-0.14775	0.00956633	0.220956	8.8867	7.20779	6.62493	7.38422	8.5033	8.20558	8.96069	9.06563	8.66225	7.34449	7.08034	7.32078	8.58957	10.0699	9.6982	6.4188	11.0193	7.7709	10.9534	10.1819	11.181	9.04523	9.59226	10.1005	8.50836	8.47986	10.6674	8.72898	9.68398	8.35079	5.19386	4.79983	9.60695	9.23691	8.44689	7.54566	10.8854	9.80936	11.1804	10.8314	9.50197
9p24.1	NM_203453	403313	PPAPDC2	phosphatidic acid phosphatase type 2 domain containing 2	0.91181	-0.133194	0.00966889	0.222809	2.9775	2.28706	1.92642	2.61862	2.52333	3.15919	2.74044	2.74602	2.80095	3.27093	3.95343	3.2666	3.06258	3.28676	2.8022	2.87921	3.44694	3.03945	4.90002	4.69592	4.50043	3.35592	3.7323	3.45725	2.63033	2.53634	3.4956	3.22571	2.67569	3.09559	2.16557	2.07224	3.83793	2.94832	3.52932	3.13235	2.53285	2.56821	2.94936	2.62615	2.98291
19q13	NM_003367	7392	USF2	upstream transcription factor 2, c-fos interacting	0.887214	-0.172647	0.00969345	0.22286	18.5402	22.8705	21.333	18.4965	18.9946	14.9139	11.6904	15.6965	17.8279	10.8939	12.2812	13.6661	19.0975	21.2964	17.3412	12.6791	13.9939	11.958	18.0491	18.3971	23.2138	26.3278	20.6663	27.5755	17.2383	16.0074	14.2938	19.6196	21.4028	22.9499	24.8455	23.756	14.6119	22.5799	21.4864	24.5432	19.5803	20.3361	12.2983	15.3277	18.0342
5q31.3	NM_018927	56099	PCDHGB7	protocadherin gamma subfamily B, 7	0.702743	-0.508932	0.00982318	0.22522	2.42523	4.73548	1.80677	0.892015	1.13047	1.00127	0.524356	1.48205	0.809955	2.21836	1.46849	1.84407	1.11821	0.838228	1.00509	3.33298	1.64085	2.37487	3.11204	3.78388	3.74451	2.26136	2.6478	1.86357	2.09141	1.35513	1.81556	3.80604	2.90502	4.02427	4.00233	3.42506	4.84811	3.31738	4.50942	3.83041	2.77774	2.45927	1.82924	3.03069	3.73882
5q31.2	NM_001271803	51308	REEP2	receptor accessory protein 2	0.763381	-0.389524	0.00985044	0.22522	15.4183	17.6382	20.7189	16.36	16.0201	13.6856	15.6935	15.6473	14.7074	2.55964	4.87089	5.87429	13.5872	11.9308	12.2641	5.9752	12.0703	8.37622	29.1748	28.117	31.707	14.9361	13.6035	13.4781	20.512	22.845	13.1648	13.8055	13.599	20.4385	31.8933	31.3079	14.0343	14.8342	17.4404	16.2194	17.529	17.9798	15.2094	20.7026	22.5079
11p14.3	NM_022725	2188	FANCF	Fanconi anemia, complementation group F	0.872997	-0.195952	0.00986383	0.22522	6.4608	5.34891	4.67214	6.11398	4.5775	5.65646	6.38845	6.50516	6.34896	3.69672	4.50993	4.55833	7.03007	6.54949	8.62264	5.30975	7.46059	4.76011	6.943	6.98254	7.02696	5.35031	4.76245	5.23685	5.96044	8.076	6.81784	5.74043	5.21659	5.36253	6.56642	4.76103	6.85071	6.005	6.13313	5.42732	4.95439	5.80427	5.70279	6.83979	6.78716
22q13.2	NM_019106	55964	SEPT3	septin 3	0.680885	-0.554517	0.00990726	0.225359	46.4454	57.1756	36.5406	32.5373	26.5029	30.4007	17.6137	12.1952	13.9777	1.6779	2.63299	2.84307	29.792	36.0417	40.7857	17.6228	25.4455	12.4854	71.6442	74.6943	80.4025	13.7923	12.1489	11.4011	35.641	35.5535	34.7941	18.171	20.6335	22.8234	20.9308	20.5968	17.8005	24.3846	30.3946	26.8307	15.6706	26.9288	25.4715	18.0871	26.3327
14q32.2	NM_001291814	123096	SLC25A29	mitochondrial basic amino acids transporter isoform 2	0.638249	-0.647809	0.00991509	0.225359	5.01831	3.31127	7.00246	8.35427	5.22615	7.16411	6.78187	0.730503	2.53975	1.35429	0.979342	0.001061	7.71792	6.9429	12.2023	3.31097	3.93097	2.19534	5.72645	5.38082	9.24925	4.53746	2.30456	2.32687	5.27894	7.96386	6.08701	2.3985	2.50728	5.67758	7.02213	7.44988	5.02851	7.63081	6.99597	6.08414	6.07934	4.97311	6.01394	6.21479	7.2172
15q22.2	NM_004330	663	BNIP2	BCL2/adenovirus E1B 19kDa interacting protein 2	1.13345	0.180724	0.00996172	0.225905	8.59223	5.49742	5.83158	9.019	10.4704	9.64427	10.3366	9.46225	8.67616	11.9848	13.9292	11.2169	10.1114	10.5274	8.2932	11.9291	10.3781	11.7948	6.24827	6.27033	5.42435	9.0538	9.89843	10.181	6.63561	5.35381	7.46469	11.3586	8.8596	8.69776	3.67609	3.25429	5.16443	7.62425	8.3201	7.01243	10.604	6.61866	9.39469	7.39405	5.92454
22q13.2	NM_014570	26286	ARFGAP3	ADP-ribosylation factor GTPase activating protein 3	1.08246	0.114312	0.0100647	0.227722	20.479	15.8299	19.595	17.8092	21.7844	18.7188	19.7196	21.0345	20.4888	20.8438	24.0136	20.4575	19.71	20.8958	17.0443	17.9962	22.1527	23.5853	17.3999	14.7426	14.3675	16.0173	16.9179	18.7762	10.3373	9.86159	14.943	23.1366	20.4331	19.0423	7.39174	6.58231	11.1892	18.8621	19.5871	17.2729	21.2219	18.9317	22.4514	17.7245	14.6021
6q13	NM_012434	26503	SLC17A5	solute carrier family 17 (acidic sugar transporter), member 5	1.13479	0.182431	0.0101388	0.228875	6.90209	5.61163	5.71104	6.38516	8.02287	7.46901	6.9167	6.49486	7.31087	9.68436	9.99904	9.68946	6.69138	7.60129	6.55729	5.64825	6.19824	5.12196	6.82216	6.80415	5.81533	6.63349	5.94716	7.52288	6.86935	7.86607	7.55098	5.3172	5.06003	4.90785	3.97523	3.12436	5.94148	7.92033	8.23087	6.59842	7.0006	7.39987	8.0643	5.99667	4.59397
17q25.3	NM_005782	10189	ALYREF	Aly/REF export factor	1.06491	0.0907376	0.0101615	0.228875	38.6006	41.5069	41.4223	43.2249	41.597	39.1782	36.9257	40.9238	43.7735	32.5623	34.3988	33.4639	47.0624	49.2978	39.8818	44.8517	59.1693	32.2035	24.6193	21.4811	22.5684	28.6991	25.2554	25.7972	28.7971	30.5994	22.8177	32.0874	36.3344	36.8806	31.5859	28.6472	17.9542	37.7173	36.9429	35.0099	33.9116	27.7577	25.9659	31.257	21.145
13q34	NM_023011	65110	UPF3A	UPF3 regulator of nonsense transcripts homolog A (yeast)	0.753508	-0.408304	0.0102195	0.229662	5.85417	4.53551	2.10324	2.24805	2.43813	2.04282	1.81584	2.81357	3.5971	2.10708	2.32007	2.69261	5.08938	4.64192	2.67998	2.4889	6.18449	6.78159	4.95874	4.90377	6.65804	5.02249	4.07003	3.62829	3.15908	2.41659	2.84386	5.7077	2.14449	2.52798	1.59047	2.23533	1.23052	4.84228	4.67055	3.74044	5.30008	3.67822	3.15734	3.77233	2.82494
9q34.3	NM_001004354	441478	NRARP	NOTCH-regulated ankyrin repeat protein	0.701039	-0.512434	0.010293	0.230269	5.43746	4.35665	4.63595	3.91113	3.37665	3.38051	2.42316	1.59423	1.54293	0.690843	0.944805	1.12867	2.72838	3.48844	3.12016	8.10314	6.83943	3.5856	3.09746	2.46639	3.11706	6.52426	5.66777	6.89067	4.21331	4.7489	4.38502	2.84673	3.13708	3.70704	2.45386	2.74515	1.80571	2.87211	3.28666	3.20407	1.90752	3.14113	4.76875	2.89839	2.751
16p11.2	NM_001024401	388228	SBK1	SH3 domain binding kinase 1	0.657416	-0.605121	0.0103083	0.230269	18.6028	21.7875	15.6711	19.6564	15.8379	16.8691	8.50344	5.42144	6.15578	1.0017	1.52682	1.54783	8.93632	8.14837	10.3288	7.55217	9.33525	5.74912	35.62	37.0649	42.4915	6.93238	5.97828	7.36012	22.3759	21.8693	19.0756	9.05254	11.8934	16.2186	18.5407	18.7377	7.20966	13.1878	12.8562	14.7955	10.3744	20.2308	14.372	9.40593	14.4558
8q24.13	NM_001282974	9788	MTSS1	metastasis suppressor 1	0.654776	-0.610928	0.0103157	0.230269	10.993	9.35917	6.72008	7.66346	6.14922	7.53936	3.10889	2.16552	2.7571	0.950613	0.948706	0.890343	8.04359	8.94436	8.71737	4.23929	7.24987	2.44123	22.7819	22.7109	22.5107	3.54928	2.89128	3.04836	9.74573	8.28316	11.5742	7.25293	4.30402	6.19751	3.9275	3.93316	4.64518	4.61436	5.55927	5.49041	3.64543	5.86136	4.75968	7.08192	7.38197
3q22.3	NM_001085049	22808	MRAS	muscle RAS oncogene homolog	0.832195	-0.265007	0.0103965	0.230374	3.31715	2.55814	2.36674	4.35446	5.31381	5.10523	3.8614	3.60161	3.34035	3.61553	3.72772	3.25156	2.9269	3.82408	2.64165	4.42259	4.88952	3.62766	10.5429	10.8447	9.66089	7.10744	5.92364	6.83751	5.51511	3.48579	4.43647	5.71396	4.71619	3.96772	3.97409	3.22196	5.43566	3.11	3.42313	3.46075	4.42094	4.356	4.62714	4.29901	4.22007
3q21.1	NM_198402	201562	PTPLB	protein tyrosine phosphatase-like (proline instead of catalytic arginine), member b	1.16083	0.215152	0.0104024	0.230374	6.55435	5.11469	3.74037	6.26245	6.44197	7.24086	5.85125	5.89913	6.01735	8.08025	8.81785	9.00379	4.88302	8.05539	6.00573	7.07437	6.11645	5.98251	7.78004	6.00281	5.07577	6.66286	7.33663	9.17477	3.89051	3.86833	4.39255	5.21648	5.31276	5.49991	2.23651	1.71088	4.45556	5.58391	5.81476	4.86069	5.09131	5.18968	5.56783	6.73869	4.17728
8q12.3	NR_027378	643763	UG0898H09	uncharacterized LOC643763	0.715702	-0.482569	0.010411	0.230374	1.72111	1.79862	1.4396	1.63111	1.60958	2.10361	1.86692	1.50134	1.43448	1.06472	1.44655	1.05466	0.98677	1.54418	0.930632	1.82696	5.24317	2.59557	3.74069	3.86516	3.48012	1.26406	1.30055	0.745293	5.54863	5.27054	5.09953	2.3656	2.71609	2.54177	1.6982	1.39172	2.97541	1.39498	2.17884	1.66719	1.77678	3.60866	2.42832	1.54621	1.72843
19q13.2	NM_001271938	1954	MEGF8	multiple EGF-like-domains 8	0.833827	-0.262179	0.0104128	0.230374	5.72017	6.95939	4.36832	9.02751	7.56873	7.60837	8.9042	9.0844	9.05099	6.79955	6.46435	7.70655	5.4112	5.63574	5.80502	5.36439	5.8103	6.23037	11.8573	10.7531	14.8448	8.1375	7.45639	7.99737	12.0505	10.4682	8.89801	7.99491	10.2367	12.1231	18.5967	16.1525	10.4367	10.0886	9.91582	11.2443	10.9982	11.3653	7.20401	9.25131	11.791
Xq24	NM_145802	23157	SEPT6	septin 6	0.72255	-0.46883	0.0105011	0.231388	9.86631	9.69662	7.25582	14.7948	17.6159	16.7899	5.09377	5.51147	3.984	1.69417	2.77619	2.40139	5.37627	5.64783	4.57172	14.0333	11.6162	10.2365	24.7156	22.7039	22.8911	9.77112	8.57355	7.98023	8.76379	7.80596	10.034	10.1463	9.19824	9.72143	3.16517	4.87165	6.54922	8.62293	9.02811	7.60286	11.9564	12.8697	16.6548	9.91521	9.99699
2q33.1	NM_015934	51602	NOP58	NOP58 ribonucleoprotein	1.2194	0.286174	0.010505	0.231388	18.3897	14.4242	18.4581	16.4851	22.0476	17.2329	13.4606	14.1642	13.204	14.0174	21.8761	16.3236	29.8375	27.4082	20.5781	18.8186	16.9999	22.7267	11.1654	12.1145	12.3958	12.7817	12.6324	11.8623	6.93135	4.44114	8.96551	14.5869	13.6851	14.3942	3.20003	2.92312	3.67578	14.1813	14.1878	13.1813	15.389	10.9345	16.7501	9.20475	9.93727
16p13.13	NM_015914	51061	TXNDC11	thioredoxin domain containing 11	1.15264	0.204945	0.0105743	0.231419	3.8576	4.26081	3.99087	6.32425	7.51974	7.36397	7.39633	7.15048	7.51347	8.51919	8.78694	10.1395	6.61141	6.57146	5.90798	6.21171	6.17909	5.51696	4.56217	3.94266	4.37272	4.62167	4.91255	6.36622	4.31552	4.25826	4.09413	7.36437	6.78071	5.83561	4.91211	4.33682	6.59683	5.52576	6.5488	4.99464	7.72014	6.01504	4.78315	7.15949	5.48351
17p13.1	NM_000018	37	ACADVL	acyl-CoA dehydrogenase, very long chain	0.813501	-0.297785	0.010604	0.231419	8.89384	11.5283	22.4954	16.4145	13.1273	11.8882	6.0301	20.6711	26.8843	15.9705	11.2994	20.4951	13.2733	13.5752	14.0149	14.2461	10.7016	19.7639	16.2448	13.9866	18.2722	19.4203	12.3622	20.788	14.8262	15.8603	6.95233	25.1164	39.796	44.1708	34.2178	34.9675	9.25107	34.1427	25.4228	28.275	16.9108	28.4437	12.3321	17.0527	22.0649
9q34.13-q34.2	NM_001042368	5900	RALGDS	ral guanine nucleotide dissociation stimulator	0.854789	-0.22636	0.01065	0.231419	7.10035	10.1446	8.50654	12.8576	10.8841	11.1034	8.11339	9.88649	10.0332	5.57232	6.65967	8.63534	7.32	10.3861	5.88368	8.36805	10.6627	6.3293	15.0736	15.3008	16.9096	11.9688	10.6734	11.4775	10.6865	10.3177	9.54308	9.53309	10.8851	12.1104	20.3933	18.4638	9.08813	8.79012	8.28415	9.1917	10.2874	15.0398	8.72545	9.1268	11.069
12q13.12	NM_147190	91012	CERS5	ceramide synthase 5	1.14909	0.200497	0.0106684	0.231419	4.07788	3.94012	3.9394	9.10729	9.33292	8.89497	8.426	10.3179	9.24264	10.0028	8.9467	9.53122	6.56994	8.52153	6.67286	9.48643	7.2909	8.01585	4.37959	4.01213	4.19293	6.78975	5.41352	5.3488	5.6033	5.64423	5.06883	8.42015	9.34351	8.19196	4.99552	3.56403	5.65956	8.11784	7.32121	6.48559	8.10913	7.66297	6.20768	5.71941	5.90104
9q33.3	NM_005347	3309	HSPA5	heat shock 70kDa protein 5 (glucose-regulated protein, 78kDa)	1.10383	0.142518	0.0106722	0.231419	40.0807	35.7017	33.7861	46.1028	55.1265	52.6518	53.644	58.2812	51.3153	68.6822	79.2854	65.4939	42.2342	39.9731	23.9814	76.7734	76.2291	89.8091	21.2212	20.2775	25.7479	40.7286	35.767	41.7608	23.7355	18.9747	30.5185	54.1814	58.0275	57.6607	15.007	17.1371	20.636	47.2334	44.1689	47.3323	78.8005	58.465	77.2617	37.0159	33.4175
12q24.22	NM_012174	26259	FBXW8	F-box and WD repeat domain containing 8	1.32339	0.404243	0.0106731	0.231419	2.3338	2.74583	2.39069	3.73482	4.39553	4.44457	4.78243	4.11869	3.97376	3.99906	4.27119	4.29744	1.82135	3.48621	3.84229	1.78795	4.65869	4.34442	2.19486	2.58372	1.77579	3.37317	3.24291	3.04736	3.12662	2.73333	2.32604	3.01862	2.23967	1.97964	2.90776	3.02235	4.70587	5.59929	4.65058	3.3674	2.69724	2.27589	1.52032	2.11237	3.18946
18p11.32	NM_001071	7298	TYMS	thymidylate synthetase	1.2227	0.290074	0.010718	0.231419	7.37433	6.18829	5.78998	6.47097	5.7096	7.24408	6.10067	6.56342	6.12463	4.31788	5.08192	4.55153	4.45812	5.84984	2.90176	7.51487	9.47459	8.52623	2.74304	2.25775	2.24625	6.8459	7.02308	6.8987	4.63982	3.66683	3.62492	4.05118	6.25754	6.18335	1.29144	1.38379	2.17323	4.79679	4.41723	4.30384	6.8804	6.95577	7.50402	3.78012	2.6409
7p22.1	NM_006854	11014	KDELR2	KDEL (Lys-Asp-Glu-Leu) endoplasmic reticulum protein retention receptor 2	1.08545	0.118295	0.0107419	0.231419	42.1495	35.2237	36.4871	62.9666	72.0222	75.5863	76.2895	82.7804	83.7012	113.851	130.825	121.493	75.3118	78.904	72.2889	71.2355	62.2164	63.1035	26.0469	25.9696	26.4626	56.1568	51.3414	61.2997	45.2917	50.3653	51.367	77.4631	79.7585	70.902	31.387	29.4227	55.2668	80.0725	75.4557	65.2182	75.5412	61.5056	69.0691	47.5325	39.0702
1q31.1	NM_017847	54953	C1orf27	chromosome 1 open reading frame 27	1.22703	0.295166	0.0107682	0.231419	3.53893	2.72941	3.31308	3.11427	3.94214	3.19952	3.60438	3.41297	3.25254	4.43984	5.90085	4.8065	3.6937	2.98446	2.01936	3.69814	2.99285	4.71815	3.53361	2.71874	2.73209	2.48691	3.4916	3.78048	2.57271	1.70679	3.376	4.09163	2.83777	2.97932	0.776549	1.54498	1.56844	3.37912	3.11505	3.31092	3.98089	3.18814	4.88986	1.71594	3.19845
3q21.3	NM_015720	50512	PODXL2	podocalyxin-like 2	0.671225	-0.575131	0.0107761	0.231419	45.929	47.1459	52.2117	39.1467	36.2131	30.1491	27.974	24.5426	27.17	1.40405	2.68928	2.73583	36.0982	36.0111	44.4412	13.3539	32.8685	17.1307	87.9245	86.469	90.2368	17.3259	11.913	12.4182	43.3088	53.6134	40.3243	21.7284	27.8718	34.8649	37.8327	40.2451	15.0259	27.1424	29.3291	29.5008	24.1082	39.2246	22.0185	24.3301	32.4025
5q31.2	NM_016605	51307	FAM53C	family with sequence similarity 53, member C	0.927539	-0.10852	0.0107983	0.231419	13.2579	11.7716	10.4613	13.4894	14.8089	12.9123	11.3256	10.6551	11.36	10.9368	9.37312	12.2507	13.0196	14.5739	14.29	13.9902	12.5354	10.5776	11.9884	11.8592	13.9481	14.932	12.4678	15.2153	14.6542	11.3841	11.7209	12.5284	12.9101	14.365	17.5902	16.2614	13.0027	14.4054	14.3442	12.8244	13.5815	12.4394	11.4669	11.4323	11.9476
9q34.11	NM_014286	23413	NCS1	neuronal calcium sensor 1	0.849627	-0.235099	0.0107999	0.231419	21.7822	23.5587	21.3746	20.4757	19.0593	16.8657	13.6746	13.0363	14.0444	7.88331	8.3627	10.3742	15.1185	22.1839	24.7292	13.5183	18.2566	11.769	40.9786	36.039	48.4378	15.6462	14.3795	15.5464	17.9432	23.3524	16.8591	16.5656	19.4093	24.4891	27.1693	26.4463	15.9675	15.4472	17.7056	18.3072	16.4742	18.1004	11.6539	12.2415	17.1941
3q25.22	NR_003001	677767	SCARNA7	small Cajal body-specific RNA 7	0.949926	-0.0741135	0.0108079	0.231419	745.053	652.173	573.778	700.366	570.456	610.105	410.444	358.456	500.86	281.885	271.193	332.483	680.016	540.621	801.938	479.413	599.308	489.351	606.59	809.153	768.447	400.951	433.404	419.754	647.372	452.567	613.359	373.457	420.698	408.225	1005.61	905.988	740.881	592.906	525.882	658.613	451.842	396.857	440.239	491.787	572.295
7q36.1	NM_001099220	643641	ZNF862	zinc finger protein 862	0.847768	-0.238258	0.0109007	0.232171	2.77645	3.07804	1.86858	3.08643	2.90501	2.73137	2.80959	2.56366	2.97975	2.10697	2.10747	2.24607	2.58538	2.87468	2.78572	1.89835	2.3254	1.78297	3.75006	4.13704	4.32088	3.03302	2.84269	2.47187	4.26547	3.42564	3.10942	2.72599	2.89556	3.21387	4.17059	3.79403	3.05813	2.93084	3.27502	3.25598	3.43335	3.41428	3.04058	3.25845	4.37817
20q11.23	NR_003018	677840	SNORA71D	small nucleolar RNA, H/ACA box 71D	1.13118	0.177832	0.0109058	0.232171	161.609	399.33	385.183	170.066	263.381	263.945	190.737	174.99	145.261	132.089	93.7504	116.691	260.185	412.718	349.552	31.5657	269.642	103.461	24.1253	39.1024	77.4631	173.57	144.207	148.253	123.626	121.792	81.2995	103.197	114.936	89.239	74.6582	58.3575	93.5192	66.5944	65.3188	69.3312	119.248	236.171	122.645	66.5364	122.812
1q21.3	NM_153649	7170	TPM3	tropomyosin 3	1.13564	0.18351	0.0109245	0.232171	12.8133	10.6213	9.86984	18.4537	17.5741	21.7314	21.6282	24.5362	22.4419	27.568	31.2208	26.9631	20.0137	22.4954	15.1037	23.8365	28.4163	28.6067	9.62628	8.21552	8.91588	17.9123	18.7133	18.6695	10.2805	9.71573	10.4077	19.6128	17.5945	18.9485	7.74826	7.16701	15.5606	15.7017	14.8838	14.5653	22.7123	15.0039	19.2254	13.7618	10.1461
22q12.2	NM_004147	4733	DRG1	developmentally regulated GTP binding protein 1	1.12227	0.166424	0.0109369	0.232171	24.5689	22.2059	24.7964	22.6476	28.0767	22.8815	22.9546	26.4556	25.1081	29.4876	35.5601	27.809	26.6742	30.48	18.9642	27.0772	29.4911	31.6157	23.9458	22.2815	18.7556	17.6226	19.4935	17.1944	12.3459	10.2066	16.265	29.9589	24.1236	26.5503	7.93676	6.05032	15.7336	19.8568	19.5781	18.5538	26.5678	22.0333	24.8275	18.396	17.4
22q13.1	NM_000026	158	ADSL	adenylosuccinate lyase	1.10238	0.140619	0.0109599	0.232171	19.6523	15.546	19.868	18.2026	22.095	22.9643	27.5516	29.1568	36.7745	36.0336	37.8978	34.3387	19.008	25.2595	15.4412	24.5951	31.2591	30.988	16.355	16.7275	14.0384	24.0246	19.2163	21.816	15.002	18.3095	14.0491	27.4822	23.6187	26.0568	11.0869	10.152	23.2323	22.7598	25.5396	18.2814	25.7065	21.0517	20.7121	18.5063	17.6428
6p22.2	NM_003529	8350	HIST1H3A	histone cluster 1, H3a	0.872245	-0.197194	0.0109826	0.232171	54.7728	42.4052	77.3108	53.6812	41.7404	34.7869	40.4355	54.8151	49.7156	19.6064	18.8935	19.1853	65.2551	71.0612	56.4157	58.2266	106.638	80.4909	33.0809	29.0584	32.7888	33.2184	33.0107	34.158	45.0961	59.1157	27.9385	65.2677	82.0762	99.1499	36.4925	41.41	30.1146	53.1466	53.2124	54.1409	95.065	76.5251	64.3119	25.5037	23.6075
19p13.3	NM_021217	58492	ZNF77	zinc finger protein 77	1.29828	0.3766	0.0110285	0.232534	5.00935	4.79145	4.45818	3.36029	3.78467	3.45872	2.4762	2.25722	1.84156	1.66928	1.99001	1.53176	2.51159	3.5086	3.00557	1.39192	1.51977	1.77883	2.95058	2.6912	2.77261	2.05747	2.38266	1.99523	2.21831	2.04947	3.1501	2.47757	1.68111	2.18815	0.733185	1.04781	1.67887	2.22495	2.37867	2.3161	2.35688	2.69016	2.67431	1.53861	2.16698
7p15.2	NM_004289	9603	NFE2L3	nuclear factor, erythroid 2-like 3	0.677487	-0.561736	0.0110464	0.232534	1.60445	1.50143	0.949066	1.8966	2.37585	1.53502	3.74512	3.77176	3.36084	1.95284	2.14961	1.81172	1.85007	1.48926	1.53669	2.91449	1.88402	4.89506	3.1947	3.02236	3.07503	1.9644	3.29099	2.90698	2.31726	1.52397	2.56136	5.32593	4.03372	4.37542	6.13913	4.02529	11.1374	3.78432	3.52106	3.67692	2.08551	1.86168	1.75201	13.5008	9.13051
11q12.3	NM_006362	10482	NXF1	nuclear RNA export factor 1	1.13023	0.176619	0.0111034	0.2332	8.4729	7.92478	6.64145	12.7333	12.7554	10.7752	9.00484	9.47022	9.69229	11.8024	11.4874	10.8092	11.0428	12.7154	11.2987	13.8449	10.2644	9.69833	8.17894	8.41614	7.84006	10.1438	9.66576	10.5414	7.1195	5.1732	7.01231	10.0657	8.51351	9.17637	3.09855	2.17057	7.05546	8.20913	9.16772	6.4954	10.6713	7.85734	8.72446	6.6781	8.52869
19q13.42	NM_001145971	112724	RDH13	retinol dehydrogenase 13 (all-trans/9-cis)	0.797973	-0.325588	0.0111255	0.2332	0.845443	1.86843	0.003092	1.90197	0.857293	1.98332	1.82163	2.09607	3.34865	2.58122	3.00692	1.44673	1.29218	2.16214	2.29143	1.83399	0.880255	2.6192	2.12303	2.52168	2.15969	2.60707	1.97246	2.18567	2.70845	2.01295	0.547629	2.69549	1.65682	2.39529	5.53479	5.55459	3.15162	2.62267	1.93154	2.57811	2.0819	3.00876	2.44801	2.33114	2.23646
9q21.13	NM_006200	5125	PCSK5	proprotein convertase subtilisin/kexin type 5	1.32297	0.403781	0.0111482	0.2332	2.67507	1.60076	1.94071	3.77865	3.39309	3.40906	3.75376	4.14285	3.76121	7.7879	6.08106	6.43877	2.95217	4.83573	3.78801	5.72108	4.76265	3.55522	0.868456	1.52113	1.40193	2.58654	2.0568	2.70091	2.06468	2.51082	3.62723	5.53419	3.50174	3.93363	0.583737	1.48171	1.88707	3.80577	3.50959	2.90576	3.68321	3.73048	3.07367	1.81523	1.28972
10q22.1	NM_000917	5033	P4HA1	prolyl 4-hydroxylase, alpha polypeptide I	1.11508	0.157154	0.0111759	0.233288	37.7849	31.1126	42.5584	41.8665	59.9632	43.5044	83.8862	75.9008	75.8437	72.3949	95.6673	74.4294	45.3493	37.7925	25.6993	87.0227	57.369	71.9917	21.767	20.3617	17.6579	35.6211	45.3364	41.8335	20.9235	16.5913	36.2889	77.0209	70.9649	69.3621	16.2332	18.0235	26.6061	42.7662	36.7147	43.3791	64.0998	58.3895	78.5316	61.3392	50.3808
4q25	NM_015454	51574	LARP7	La ribonucleoprotein domain family, member 7	1.28556	0.362401	0.0112056	0.233288	4.8121	4.69052	5.71889	4.87066	6.03531	4.62893	5.07597	7.35281	6.0092	3.35103	6.84117	4.06108	5.62904	4.53946	4.98174	3.71222	7.07182	6.8123	3.73617	4.06177	5.13572	3.38106	4.6742	4.3496	2.09193	2.50557	4.09977	6.63374	5.74904	4.46305	2.02173	1.19419	1.12166	3.42575	2.82431	3.5978	5.54429	5.13351	4.60599	1.96102	1.66547
13q13.3	NM_004734	9201	DCLK1	doublecortin-like kinase 1	0.682697	-0.550682	0.0112233	0.233288	13.4515	10.8947	6.06957	7.38994	7.92661	9.23189	4.25456	3.60471	3.14994	0.764251	1.89788	1.39856	7.8828	9.77043	8.53825	5.06417	6.52646	4.20007	27.2796	27.7473	26.2693	4.34223	3.70024	3.14693	10.7065	8.62166	11.1428	7.21321	6.01506	6.98548	3.44914	3.58332	6.23413	5.56044	6.33746	6.19304	5.50077	8.16308	7.66747	8.06934	10.0155
1q43	NM_000143	2271	FH	fumarate hydratase	1.0916	0.126448	0.0112501	0.233288	21.9386	17.3304	19.2742	20.0592	24.3106	21.0699	24.3074	26.0811	22.4219	19.0343	22.4223	20.6633	20.3128	19.6281	17.1864	19.8699	23.0964	25.9612	20.9753	19.5126	21.3178	15.2967	15.9571	15.5205	12.1134	10.4107	15.0094	21.8388	19.0348	21.9926	7.09423	6.59352	10.5665	16.6309	16.8756	16.1209	23.9065	23.0806	20.2459	17.7705	14.7244
22q13.2	NM_001003796	4809	NHP2L1	NHP2 non-histone chromosome protein 2-like 1 (S. cerevisiae)	1.03583	0.0507834	0.0112783	0.233288	38.6113	35.8059	45.3887	44.3586	51.7052	41.0419	42.3316	46.0067	51.2389	39.4991	39.5556	41.2757	41.1928	48.4723	45.9653	34.8961	47.7047	39.066	36.8544	40.6987	37.2052	33.1147	28.5427	33.5762	26.5534	32.4448	29.5017	36.7897	38.7602	37.3443	32.1116	35.9489	27.1494	38.1046	41.8474	35.3772	41.6077	35.7784	29.947	40.1825	36.9521
3p22.1	NM_001042646	22906	TRAK1	trafficking protein, kinesin binding 1	0.872269	-0.197154	0.0113084	0.233288	9.42205	9.09712	4.73489	9.92137	8.67172	10.0189	8.73871	7.56689	8.42311	5.33198	5.73917	6.06703	6.50121	8.47001	6.93677	7.56554	9.41868	7.07836	15.4517	15.2516	14.7379	9.50583	8.87886	9.97594	11.0556	9.86669	11.0858	8.88022	7.42451	8.23057	7.02164	7.1139	10.275	8.40147	9.66426	8.81916	7.62597	8.99262	9.03863	9.39765	10.6497
14q11.2	NM_017807	55644	OSGEP	O-sialoglycoprotein endopeptidase	1.14839	0.199617	0.0113204	0.233288	6.18882	5.33836	5.01507	7.01089	6.31956	6.27692	7.16561	7.32851	9.26498	7.58525	7.97365	7.5091	8.15724	11.4356	8.93207	7.93181	7.40939	7.11592	6.00915	5.7677	6.44485	6.55511	4.77188	4.69028	5.45567	4.40996	4.72151	7.47535	6.15744	6.35191	3.71848	3.12041	4.8814	5.30511	5.4174	4.999	6.45713	4.79209	4.47842	6.10461	6.03332
1p36.11	NM_015484	25949	SYF2	SYF2 pre-mRNA-splicing factor	1.14224	0.191868	0.0113581	0.233288	15.8407	12.2945	14.2221	10.543	15.1056	10.8587	12.9656	12.198	11.5889	11.1956	15.7275	12.0575	12.8211	12.4467	10.4822	15.4043	13.7451	17.7186	9.11582	9.13207	8.39828	11.5961	11.2774	11.3937	6.33997	5.18715	9.07865	13.439	14.1773	13.1688	3.97786	4.26283	3.83106	11.4474	10.0669	9.59949	12.8895	11.5168	16.6647	9.21465	9.07668
15q11.2	NR_003334	100033431	SNORD116-20	small nucleolar RNA, C/D box 116-20	0.858404	-0.220272	0.0113628	0.233288	1196.22	2433.14	1079.53	624.259	1199.63	881.695	612.188	510.619	240.007	968.349	1107.44	685.907	1153.94	661.268	427.689	823.182	257.385	271.573	2776.05	1783.47	2208.17	1948.12	2860.8	4125.77	963.622	1151.07	1111.73	2276.61	2956.63	2587.4	782.506	1162.14	800.124	1355.84	1551.82	1753.39	801.565	1518.11	1609.57	885.898	1635.15
11q23.1	NM_001541	3316	HSPB2	heat shock 27kDa protein 2	0.682859	-0.550341	0.0114973	0.235564	0.075029	0.385067	0	0.606101	1.66668	0.490347	0.581802	1.0213	1.16837	0.575322	0.594783	0.301402	0.974201	1.07663	0.18689	5.78861	3.51932	8.50057	0.511287	0.064727	0.072219	0.711009	0.32975	0.680382	1.36009	1.18348	0.515694	2.47798	1.98685	2.32849	3.0831	4.02053	1.70453	2.1269	2.11764	1.95145	2.23742	2.77539	0.715696	0.689748	0.622924
5p15.33	NM_033120	85409	NKD2	naked cuticle homolog 2 (Drosophila)	0.78061	-0.357326	0.0115485	0.236033	2.52302	2.80861	3.22024	2.28537	2.76561	2.30746	1.82054	1.61333	2.06931	0.823161	0.642568	0.844375	2.27352	2.5816	3.44481	2.46225	2.63882	2.22466	3.53339	3.42341	4.03409	3.22558	2.20429	2.67772	3.53581	2.69495	2.67128	1.8959	1.61404	2.94931	3.59951	3.90717	2.01031	3.69347	2.79527	2.35354	2.17378	2.734	1.48145	2.04883	2.44546
9q31.3	NR_037148	548645	DNAJC25	DnaJ (Hsp40) homolog, subfamily C , member 25	1.2626	0.336398	0.0115675	0.236033	2.23101	1.40138	1.86345	3.67551	4.2026	3.82564	1.8381	2.33611	3.35043	2.07739	2.3675	1.39477	2.71272	3.37827	2.62432	2.02275	2.7991	2.20078	2.08964	2.60671	1.9932	0.988988	2.22086	1.85362	1.82852	1.27747	1.72636	1.64815	1.53148	2.43348	1.0864	0.801834	0.973056	2.08469	2.96166	2.31908	2.39247	1.52121	3.516	1.65267	2.49763
2q14.3	NM_139343	274	BIN1	bridging integrator 1	0.686803	-0.542031	0.0116412	0.237053	11.8316	14.1203	10.7806	13.8254	10.9414	9.75473	7.02103	4.43283	6.05373	1.30515	1.21144	1.10806	7.16748	10.5964	9.17661	3.54138	6.79613	5.32852	20.8657	22.64	22.92	14.0229	12.1254	13.8527	9.38734	9.64676	9.30044	6.87129	8.31107	9.65569	12.7781	11.0792	5.00049	8.71311	10.9809	12.0893	8.0351	9.45972	7.05858	7.4976	10.9974
6q22.2-q22.31	NM_001029858	222553	SLC35F1	solute carrier family 35, member F1	0.70998	-0.49415	0.0116943	0.237478	12.3117	12.2565	8.90633	8.68345	6.88745	7.54801	6.87155	5.29072	6.11135	0.864296	1.73806	1.95227	7.12513	9.09881	7.73654	8.56158	11.2952	7.45654	22.1871	21.9005	22.8784	4.70288	4.25251	3.701	13.5514	14.7963	14.4573	6.44589	6.04172	7.45872	8.07412	6.03455	11.1751	6.62113	8.31555	6.16837	5.80138	8.16949	7.34564	6.67716	8.43948
1p13.3	NM_018372	55791	LRIF1	ligand dependent nuclear receptor interacting factor 1	1.1605	0.214746	0.0117097	0.237478	5.63586	4.59197	4.38931	4.30999	5.65644	3.95704	4.98384	4.57837	4.24395	5.07993	5.23662	4.18259	5.1246	4.61148	3.68802	5.69316	3.8126	6.1333	4.72379	4.20993	4.20402	5.06091	5.25547	5.1065	2.46572	2.38337	4.6436	4.91543	3.483	3.77616	1.62861	1.97161	2.51633	3.23831	3.87502	3.53524	3.77642	4.49022	4.8088	3.89052	3.61731
7q32.1	NR_024368	402483	LINC01000	long intergenic non-protein coding RNA 1000	0.857683	-0.221483	0.0117713	0.23791	2.16207	2.77782	1.23869	2.69842	2.20729	2.55106	2.20882	1.9651	2.36987	2.89901	2.17956	2.49039	2.08702	2.36307	2.30004	2.54609	2.06351	2.06437	2.69794	3.02945	3.50623	3.3451	2.84627	2.93958	4.65002	1.88943	2.49447	2.80865	2.72575	2.92749	4.17368	3.22048	3.27755	3.0668	3.17868	3.8411	2.69964	2.89025	2.38782	2.33036	3.31247
3p14.1	NM_015123	23150	FRMD4B	FERM domain containing 4B	1.33696	0.418951	0.0117958	0.23791	2.99947	2.65372	1.98615	4.22668	5.05389	4.30409	6.45702	5.75124	5.46106	6.61556	7.97215	6.40705	3.36527	3.20431	2.28092	7.53078	3.91512	7.71049	2.64389	2.80223	3.05676	5.07562	5.50688	5.46426	1.90134	1.24645	2.33302	4.62664	4.05486	3.46961	0.756118	0.988756	1.35107	5.08515	4.6725	4.73408	5.40134	4.49475	5.74682	3.68661	3.95331
5q15	NM_018343	55781	RIOK2	RIO kinase 2	1.22648	0.294524	0.0118378	0.23791	4.03412	2.67373	3.39005	3.9177	6.05127	4.19417	4.3243	4.57275	4.59725	5.43674	7.31542	5.82193	5.64483	5.04753	3.91946	5.79364	4.74727	5.96772	2.96916	2.5601	2.96606	3.79642	4.66648	4.43354	2.44529	2.31788	3.09984	4.87186	4.20874	4.83936	1.53414	1.29273	1.1911	4.33212	4.26702	3.44939	4.98668	4.03974	5.56588	3.04252	1.91628
8q21.13	NM_001105539	65986	ZBTB10	zinc finger and BTB domain containing 10	0.842641	-0.24701	0.0118568	0.23791	3.94604	3.2811	2.58616	3.95499	2.982	3.9459	2.7612	3.30619	2.72203	3.96408	3.91504	3.49835	3.91033	4.06484	2.26223	4.81	4.55938	2.67491	4.61024	4.87538	5.29593	4.21271	5.74392	5.56973	4.31226	3.4955	4.8573	5.75104	5.4977	4.16352	2.80683	2.2428	2.62935	3.39092	3.98782	4.00513	3.40128	2.70852	3.43753	3.46937	3.25326
20q13.12	NM_182970	140730	RIMS4	regulating synaptic membrane exocytosis 4	0.667575	-0.582999	0.0118849	0.23791	7.35884	9.27391	8.05288	6.51282	6.93044	7.27065	3.67729	3.97524	2.60939	0.725389	0.506059	0.927157	1.97443	4.31541	5.47219	4.66988	5.13834	3.93898	21.0548	19.6167	21.2159	3.06071	2.76642	3.1286	6.78796	8.40514	8.32326	5.39747	5.06385	7.98354	14.8589	11.3453	6.38264	4.3963	4.48634	4.86314	6.42954	8.35411	5.85582	5.59771	7.31375
12q21.2	NM_007043	11103	KRR1	KRR1, small subunit (SSU) processome component, homolog (yeast)	1.17832	0.23673	0.0118852	0.23791	7.15914	5.26868	5.46227	6.41939	8.30868	7.33101	7.62342	8.32486	9.02627	11.5988	15.4923	11.1363	9.99444	8.57969	6.88571	13.8158	8.06382	10.0467	5.59276	5.06194	5.29106	6.71701	7.88348	6.99774	4.80187	3.26752	5.9449	9.82101	8.94145	8.34538	2.83353	2.22371	3.22284	6.22605	6.32299	5.95726	8.72603	6.79471	9.68265	6.42137	5.2103
5q23.2	NM_020747	57507	ZNF608	zinc finger protein 608	0.809914	-0.30416	0.0118979	0.23791	13.967	13.9448	7.27325	9.18611	8.52488	10.1176	8.20665	6.73812	6.16376	6.71396	7.20401	6.78376	6.25664	8.49323	6.02317	15.7833	15.0307	12.1687	30.4764	31.7566	30.1308	18.7409	19.7235	16.1964	16.5778	12.3268	15.1367	13.3442	9.68101	9.96785	4.84722	5.00628	10.7408	8.08915	9.64562	8.74623	8.39846	7.86045	12.0821	8.86302	9.49335
1q23.3	NM_003115	6675	UAP1	UDP-N-acteylglucosamine pyrophosphorylase 1	1.1447	0.194964	0.0119552	0.238084	11.6954	10.0455	11.3523	11.4714	14.7593	14.4366	11.0057	12.0507	11.095	14.7247	16.8882	13.4335	15.1515	14.5186	10.5446	13.0527	15.0851	17.1981	11.3354	9.09416	9.50804	9.68883	12.7101	10.4363	5.93418	4.35983	8.03743	14.0237	12.0952	11.7238	3.11992	3.63674	5.40945	11.8088	11.6174	11.4713	13.2738	10.343	13.9238	8.72462	7.12808
20q13.13	NR_003604	441951	ZFAS1	ZNFX1 antisense RNA 1	1.11557	0.157778	0.0119656	0.238084	57.7766	40.4011	70.8257	38.2295	52.7264	52.9861	54.9412	51.3758	58.3358	74.9167	58.8012	64.4914	50.8633	63.0444	57.5646	47.5675	63.256	50.4125	38.9559	32.1268	24.2234	41.8363	38.2511	41.4103	27.2917	44.9313	42.9695	66.6459	61.7503	57.2776	11.695	14.2881	23.5983	48.3955	53.2303	45.518	64.1672	53.6309	61.3754	28.7435	21.826
5q35.2	NM_052899	114787	GPRIN1	G protein regulated inducer of neurite outgrowth 1	0.652188	-0.616641	0.0119782	0.238084	17.7116	17.7695	16.8435	13.6133	11.0081	11.262	4.94116	4.07883	4.34764	1.05022	1.02367	1.1949	12.2144	11.9353	15.2766	5.28592	8.55819	3.6696	24.3985	25.5585	28.1941	5.27027	3.64876	3.91607	13.6531	16.239	13.2031	6.63005	8.30068	11.1757	15.1302	15.8084	6.79224	8.40659	9.95888	10.9344	8.26237	13.1149	9.68599	8.29863	11.4156
7q32.1	NM_014390	27044	SND1	staphylococcal nuclease and tudor domain containing 1	1.08583	0.118793	0.0120819	0.239457	46.8637	48.5047	34.5006	56.7663	59.3717	68.1145	68.0987	79.1455	79.8866	113.708	104.836	110.493	46.5949	61.7735	52.5607	73.5394	73.6735	73.692	37.2649	33.6638	34.0157	62.18	55.7285	63.6663	49.8677	39.9505	40.0364	77.1847	65.4892	62.3014	30.371	39.1057	60.433	70.121	70.5595	59.3885	76.8661	54.2816	62.8668	42.562	37.3846
17q21.31	NM_005440	8153	RND2	Rho family GTPase 2	0.741706	-0.431081	0.0121203	0.239457	5.36685	5.6718	5.86259	15.8755	14.159	13.6413	6.22507	5.93197	6.61283	1.83734	2.60776	2.54049	3.79198	3.93371	4.27622	7.28327	12.3299	7.1901	10.9973	11.3597	11.474	6.01874	5.97603	5.62086	9.17897	12.6732	8.1369	6.793	8.56367	10.5444	12.3002	11.9593	6.29074	6.82966	7.16768	6.2389	8.84195	11.6099	11.3289	9.88211	10.4931
17p13.3	NM_003585	8447	DOC2B	double C2-like domains, beta	0.642749	-0.637674	0.012124	0.239457	4.18647	5.45761	2.85073	7.93918	5.92969	6.59774	2.35604	1.93474	1.67126	0.786264	0.66435	0.899037	5.97018	6.70287	6.47268	2.98999	2.37376	3.95426	13.1677	14.5052	13.8819	16.2618	15.5603	15.7555	2.97747	2.71578	2.88379	1.55307	1.73425	3.03007	4.30781	3.53626	2.75041	5.1305	6.65312	4.63369	3.83882	4.60162	3.73707	6.32008	7.24549
2q37.3	NM_004321	547	KIF1A	kinesin family member 1A	0.743739	-0.427132	0.0121782	0.239457	49.4327	60.5296	35.8063	41.3227	33.6195	31.6917	32.4405	25.4725	31.2638	3.2307	5.35057	5.24113	31.6558	34.3545	39.1162	9.11278	33.2375	13.7374	61.4694	60.1846	63.4878	27.0232	23.334	23.9765	48.501	40.0969	42.308	27.124	31.154	36.6774	47.782	42.5676	27.3079	38.5661	50.3725	48.6309	25.9796	36.0802	27.3774	33.7541	47.2383
1p32.3	NM_002867	5865	RAB3B	RAB3B, member RAS oncogene family	0.778778	-0.360716	0.0121855	0.239457	3.26599	3.21928	1.57078	4.46902	3.51892	4.61527	3.13332	2.53803	2.86352	1.89456	2.15967	1.64927	2.43088	3.18396	2.5062	2.94617	2.29751	3.776	7.70634	8.89506	8.77524	5.94787	5.5184	5.14656	4.89184	3.27788	4.57409	2.64333	2.40318	2.68736	2.69699	2.37555	5.06825	3.98317	4.83369	4.3218	4.23058	5.07617	4.56041	3.56986	4.41879
9q34.3	NM_001282612	10439	OLFM1	olfactomedin 1	0.731944	-0.450194	0.0121912	0.239457	23.7156	17.843	15.3137	31.3621	23.547	28.9706	21.094	12.2998	16.4113	1.27044	4.99481	4.30714	22.2076	23.124	28.0288	18.9086	22.5807	13.0597	52.3522	52.3067	44.4742	17.7555	14.0774	12.6346	19.7634	21.7272	22.6162	18.2008	15.5571	13.3183	9.13415	7.35293	17.8864	13.3625	13.5872	12.5992	25.8101	29.9833	26.3493	24.2258	29.4112
2q37.3	NM_005855	10267	RAMP1	receptor (G protein-coupled) activity modifying protein 1	1.41127	0.49699	0.0123301	0.241433	1.77272	0.963201	2.19527	6.92906	7.99615	6.72072	6.87969	8.79082	7.17469	8.63251	6.08255	5.55096	6.59476	5.17385	5.10016	4.82154	3.58145	2.96917	1.33568	1.88272	1.5102	1.20032	2.27772	2.3186	1.3913	1.4076	1.17248	3.65717	4.78757	4.91121	1.75209	2.15646	0.946931	6.13223	4.77558	4.64508	4.42129	4.39478	3.44094	5.01879	2.90172
12q24.31	NM_002442	4440	MSI1	musashi RNA-binding protein 1	0.776804	-0.364377	0.0123648	0.241433	24.7936	24.0716	17.9973	23.0031	16.2274	17.9622	16.5467	12.4892	15.1253	3.25235	3.75257	4.09361	11.7172	13.361	14.8987	12.8491	19.3709	11.929	10.5062	11.2956	13.4157	22.47	19.197	22.0022	19.241	21.4459	17.5653	11.863	13.8337	17.48	24.6712	21.3269	12.0106	19.1471	22.2645	22.7418	14.3732	17.3537	17.6593	14.9305	17.3405
19q13.33	NM_017457	9266	CYTH2	cytohesin 2	0.812181	-0.300127	0.0123759	0.241433	9.21829	9.72904	6.7951	8.60947	6.72533	7.23338	5.32212	4.83121	5.08167	2.23308	3.32163	4.38102	6.53663	6.99552	7.04532	4.68946	8.27494	6.34607	12.6596	13.6556	14.8087	7.51554	7.65524	6.4029	10.4818	7.61217	7.39525	6.74028	6.35255	9.13546	10.8863	9.74629	8.07633	7.19721	9.21303	7.37322	4.84109	5.99045	4.80936	6.36679	7.28651
2p13.3	NM_001617	119	ADD2	adducin 2 (beta)	0.751287	-0.412564	0.0124028	0.241433	13.1699	12.6763	6.01793	9.74745	6.16771	8.30828	8.83461	6.81072	7.82295	1.32825	2.07709	2.1261	8.93135	11.448	6.75794	8.03972	15.1884	6.83929	14.9524	16.4588	18.6339	10.3884	9.11255	9.01958	9.90691	8.01307	8.47113	9.52941	9.00822	9.57727	5.29759	5.49123	4.39847	6.32404	8.50826	7.1891	5.83886	8.37018	7.47462	5.3201	7.78284
15q25.2	NM_004839	9455	HOMER2	homer homolog 2 (Drosophila)	0.737708	-0.438878	0.0124128	0.241433	2.18768	2.61076	1.34468	2.92075	3.46518	3.22361	3.81088	3.05561	2.37401	2.65287	2.79518	2.55778	3.58581	6.02611	3.55351	2.86035	5.00338	7.60202	4.58852	5.86317	4.98048	17.1566	18.257	13.705	3.47722	1.32455	2.50949	5.73207	4.38238	4.09978	2.09552	2.22894	4.97748	3.00278	2.626	2.29061	3.71303	3.2795	3.37669	2.51123	3.37573
5q33.3	NM_173491	134353	LSM11	LSM11, U7 small nuclear RNA associated	0.763957	-0.388436	0.0125866	0.243577	3.77428	2.84195	2.97684	4.12873	4.24661	4.24192	2.20317	2.09551	2.02439	2.03651	2.28097	2.08307	2.65388	3.07179	2.88205	3.38878	3.33315	3.06439	13.7476	13.8737	13.2119	2.78323	3.2326	3.10367	4.63561	3.99918	5.30692	3.73617	3.59184	3.64199	1.80879	1.61126	3.82479	2.89564	3.10362	2.70821	3.79615	5.45567	5.16932	3.65824	3.93369
6q21	NM_001634	262	AMD1	adenosylmethionine decarboxylase 1	1.1187	0.161823	0.0125935	0.243577	16.4795	11.5962	13.8503	17.0782	21.1487	18.1637	18.289	16.5455	17.8081	16.6755	21.081	17.534	25.6373	24.7075	17.3719	18.5996	14.8879	17.0552	17.5659	15.4537	15.0259	8.8932	11.024	10.4678	8.62252	8.46116	10.9909	15.687	13.4962	13.8562	6.2383	5.96642	15.0717	15.3037	13.3914	13.2317	15.0561	15.3492	18.9385	16.0316	11.2655
1p11.2	NM_001037501	728841	NBPF8	neuroblastoma breakpoint family, member 8	0.801032	-0.320068	0.0126244	0.243577	1.83171	2.38895	1.88208	4.7023	2.67104	3.41876	5.21953	4.622	4.6262	6.04354	6.8361	2.98285	4.41187	5.17302	4.03989	6.37925	3.38066	6.62369	3.38953	3.48854	3.70813	4.59953	4.44698	4.2539	3.75813	1.98334	3.92483	5.34288	4.79066	4.64549	2.90891	2.01893	3.95532	6.10392	6.16755	6.77321	7.65218	4.61206	7.90717	5.67182	6.66492
17q21.31	NM_173079	146923	RUNDC1	RUN domain containing 1	0.895999	-0.158432	0.0126441	0.243577	3.76191	3.9678	2.50678	6.04625	4.9085	5.68702	5.82438	5.70602	6.27945	3.7734	4.31241	4.63829	4.78154	6.1583	4.84206	4.81385	5.80537	4.59991	6.75801	6.84419	6.8413	4.83766	5.56821	5.611	6.06142	5.03951	4.70478	6.10074	5.2183	5.37055	5.02893	3.35851	5.08667	5.3723	6.08104	4.79629	5.10115	4.96706	5.04898	7.22158	6.61622
1p21.1	NM_001854	1301	COL11A1	collagen, type XI, alpha 1	1.30001	0.378522	0.0126451	0.243577	7.09613	7.51169	4.70695	6.64562	8.35058	8.82587	17.1265	14.9085	13.9409	37.5939	34.9452	31.8961	8.26935	8.83398	6.33354	14.227	15.0705	21.8185	2.79799	3.65387	3.12511	6.95624	6.41195	5.05774	6.92889	4.81712	5.1618	18.4495	14.6011	12.1983	3.74907	6.8356	8.45657	10.354	9.71917	9.26392	16.2382	10.3206	10.3069	7.84423	5.63141
16q22.2	NM_017853	54957	TXNL4B	thioredoxin-like 4B	1.15482	0.207674	0.0126782	0.243744	3.90046	4.14745	3.20559	4.53676	3.89276	4.02332	3.50621	4.59469	4.02862	2.8868	3.77787	3.60769	4.12154	4.39324	3.98732	4.25539	5.7204	3.72011	3.98484	3.55542	3.13954	3.04548	2.64732	2.78603	2.70425	3.05467	3.69474	4.45378	3.73404	3.49528	1.84708	1.65503	2.97543	3.8811	3.7091	3.3917	3.47121	3.83677	2.72842	3.41954	3.23007
6p12.1	NM_018214	55227	LRRC1	leucine rich repeat containing 1	1.32163	0.402322	0.0128147	0.244415	4.19387	3.24608	2.18534	4.36083	5.18999	6.22782	7.65592	7.45912	7.85545	17.562	17.4216	17.6658	7.47688	9.41194	7.58385	5.2844	3.00944	4.90144	2.20785	2.32992	2.03531	5.85334	6.21129	6.56827	2.58958	2.20296	2.97175	8.68531	6.79493	5.51743	2.26055	2.47047	5.5655	7.16808	7.08155	6.09792	6.195	5.46999	5.4834	6.24023	4.41273
3p25.3	NM_006395	10533	ATG7	autophagy related 7	1.15607	0.209223	0.0128908	0.244415	2.60512	2.22041	2.74208	2.64893	2.55656	2.91251	3.40452	3.5634	3.66712	3.798	3.14075	3.57277	2.12145	2.6434	2.43757	3.21651	3.5274	2.95239	2.13218	2.19222	2.25135	2.28667	2.40134	2.80456	2.48744	2.64504	2.29124	3.04151	2.56819	2.56489	2.85884	2.59106	3.44684	2.37206	2.69687	2.59084	3.47292	2.93524	2.77257	3.12226	2.75717
14q11.2	NM_001344	1603	DAD1	defender against cell death 1	1.0354	0.0501878	0.0129048	0.244415	107.877	91.6917	128.497	114.355	128.538	110.903	154.43	170.873	164.18	131.624	156.043	139.005	119.932	135.288	126.738	111.844	134.025	128.261	75.4312	72.9498	64.479	92.5412	85.4859	96.8928	76.3037	108.643	81.2508	112.606	110.555	103.356	107.87	84.3797	92.6339	137.919	139.441	120.58	123.331	97.7567	89.356	140.556	114.554
16q12.1	NM_182922	55027	HEATR3	HEAT repeat containing 3	1.17265	0.229776	0.0129049	0.244415	3.18006	3.11688	2.58295	3.30471	3.31745	3.30272	3.87442	3.68836	3.61925	3.33899	3.8406	2.96273	3.46626	3.8705	2.82567	4.02861	3.80558	3.83644	3.92781	3.52161	4.15807	2.59536	2.54257	2.33267	2.46095	1.59983	2.61143	3.03275	2.81928	2.64555	1.36752	1.29362	3.05182	2.13504	2.54332	2.3965	3.34914	2.84201	3.90943	3.16116	2.22546
6p22.3	NM_003107	6659	SOX4	SRY (sex determining region Y)-box 4	0.866438	-0.206832	0.0129238	0.244415	79.1502	73.1975	39.9562	89.8017	70.0054	98.3689	45.1097	34.6022	38.2549	18.785	22.9417	22.262	66.0097	74.0557	91.0938	55.13	79.7819	35.4898	132.461	133.838	145.214	34.0949	31.2081	31.1639	97.8298	113.24	101.649	64.0607	50.4382	51.762	54.9185	44.648	59.7891	49.2185	57.2916	48.8005	48.2052	67.7473	67.3356	52.9423	61.3952
3q25.32	NM_022736	64747	MFSD1	major facilitator superfamily domain containing 1	1.3066	0.385815	0.0129468	0.244415	2.24387	2.18565	2.38935	3.46698	5.27429	4.76126	6.19532	6.1774	6.31409	10.7549	11.8359	10.9767	4.40397	3.91656	2.48549	7.53301	5.63896	6.31509	3.19025	2.67759	2.58593	4.72996	5.3081	4.30431	3.13048	2.03459	2.38878	6.24029	5.10702	5.26697	1.9215	1.80731	3.23874	4.91874	4.44998	2.78204	6.3831	5.52883	4.45535	3.67106	1.91711
22q12.2	NM_014303	23481	PES1	pescadillo ribosomal biogenesis factor 1	1.1019	0.139991	0.0129504	0.244415	17.2291	19.086	13.8995	23.3215	22.4864	23.2366	22.8077	24.6348	27.6574	17.7344	18.2973	21.3731	25.8077	28.1034	25.3836	11.7333	27.6903	15.3182	16.4097	14.703	14.8347	16.4098	12.7462	15.7654	14.127	13.8765	13.2235	19.9626	18.2684	18.619	19.349	19.5494	14.4198	20.721	22.1924	20.2803	18.6818	15.4164	11.7862	17.1972	15.394
17p13.2	NM_014519	7775	ZNF232	zinc finger protein 232	0.864792	-0.209575	0.012954	0.244415	4.83027	4.97094	4.37001	4.03256	5.08843	4.06217	4.20324	3.94907	3.64504	2.82931	4.05925	3.32464	5.61609	6.42779	6.12352	7.02036	7.80592	7.66453	5.78396	5.84909	5.16614	4.53752	4.22704	4.69348	2.86897	2.88376	3.82148	6.71186	5.15672	5.72894	3.38798	2.86115	4.76883	5.62074	5.32906	5.82342	4.17205	4.06532	4.22339	5.36627	4.05489
22q12.3	NM_001282686	79734	KCTD17	potassium channel tetramerization domain containing 17	0.657725	-0.604444	0.012963	0.244415	4.16763	4.3084	5.56674	6.02462	5.39941	5.79681	4.7668	3.95412	3.7295	0.000157	0.027045	1.2636	3.31911	4.44429	4.41594	0.899995	6.08561	1.72094	9.44267	9.36798	8.66968	3.79314	4.09242	4.42979	5.01692	7.84256	6.8101	5.76245	3.25928	5.98234	8.06169	6.61088	4.23489	4.72721	5.34019	6.75378	5.05276	7.02249	6.64282	6.44534	5.11593
19q13.11	NM_001172774	147991	DPY19L3	dpy-19-like 3 (C. elegans)	0.848967	-0.23622	0.0129741	0.244415	2.94176	2.68185	3.04832	3.30702	4.12921	5.48657	5.0765	3.74104	4.70829	4.54844	5.21435	5.11367	4.44233	5.91439	2.90129	5.27146	5.73678	8.67813	4.2948	3.82966	3.86717	3.8934	5.82683	4.25742	5.10077	3.19066	4.36628	6.42881	5.58376	5.70014	3.75647	4.11572	7.07427	5.45914	6.82396	5.3066	6.66784	6.18067	6.67795	4.01881	3.7681
2q11.2	NM_001242560	9448	MAP4K4	mitogen-activated protein kinase kinase kinase kinase 4	0.739884	-0.434629	0.0129825	0.244415	5.56987	7.04019	2.16693	3.83514	2.48537	4.00227	3.0532	2.53213	2.76601	0.892882	1.74933	1.07526	2.44783	3.85352	2.97812	5.09739	5.44403	4.24109	9.9086	11.989	13.9528	3.74521	3.58062	2.84366	5.11833	3.65889	5.55791	4.97635	2.68382	2.56964	2.50804	1.66796	3.1497	3.40811	3.90578	3.48753	3.0014	3.69054	4.53178	3.08346	4.70399
6p24.2	NM_001100829	100113407	TMEM170B	transmembrane protein 170B	0.791869	-0.336666	0.0130146	0.244558	6.01652	3.14305	2.95093	4.75999	4.62058	4.75766	3.57486	2.77109	3.1035	1.72793	2.19166	2.10178	4.88281	4.95323	4.84718	3.48131	4.55182	3.53494	8.80513	8.77251	7.33435	2.96926	4.0877	3.82575	4.58416	5.21626	5.85179	2.98953	2.68881	2.92292	2.36249	2.35496	5.95991	3.88667	4.67	4.36072	3.14684	4.33026	5.65921	5.50787	4.89944
5q35.3	NM_014244	9509	ADAMTS2	ADAM metallopeptidase with thrombospondin type 1 motif, 2	1.46751	0.553366	0.0131788	0.247177	0.972655	1.04169	0.771825	2.06213	2.71938	2.9991	2.44939	2.51253	2.83695	9.53875	9.21366	9.5167	2.6974	3.47806	2.04132	2.29206	1.85072	1.59706	1.03808	1.11308	1.15147	0.695876	0.689974	0.582265	1.35063	0.958036	1.18061	2.62796	3.93665	2.91692	2.03803	2.25265	1.88527	3.08097	2.63843	2.42572	4.14054	3.16946	3.05366	1.29006	0.677706
7p15.3	NM_138446	115416	MALSU1	mitochondrial assembly of ribosomal large subunit 1	1.07519	0.104596	0.0132254	0.247405	15.3844	11.231	18.6313	23.381	23.8525	19.4713	19.6781	21.6503	22.8231	20.8459	19.493	24.5669	24.1539	28.2561	22.8193	15.474	18.1202	16.3883	13.8386	11.6361	12.4816	15.5831	13.9726	16.3666	9.7279	13.6421	12.144	16.78	16.6296	17.9141	12.7905	13.0907	12.0337	21.5878	21.2907	16.0702	19.6034	16.3406	16.1382	20.1758	15.3364
Xq13.1	NM_001024455	340526	RGAG4	retrotransposon gag domain containing 4	0.823267	-0.280567	0.0132464	0.247405	5.5496	4.70986	2.63356	4.63693	3.73591	4.16549	3.59065	3.33414	4.06889	2.39517	2.63676	2.86972	4.34519	4.23466	5.28277	3.63571	2.72295	3.38948	7.77937	8.90325	10.4159	4.7592	4.39216	4.22181	5.26917	4.25727	3.44034	2.89926	3.60844	4.22867	4.35227	5.07188	3.57554	3.4294	4.02243	3.84821	4.33482	4.40966	4.75097	4.38284	6.45388
19p13.3	NM_005883	10297	APC2	adenomatosis polyposis coli 2	0.663143	-0.592608	0.0132731	0.247405	6.61751	8.7911	6.28726	10.4776	8.471	8.94541	4.52936	3.35397	3.97933	0.432145	0.733243	0.808875	4.51367	4.15965	6.35768	2.90267	5.24242	2.88802	11.0844	11.1596	18.0918	3.92425	3.38313	3.22918	10.2208	12.2983	6.96029	4.8546	7.36378	10.3602	12.3269	13.6812	5.12922	6.88856	7.07091	8.45914	5.60873	10.5557	6.38272	4.89377	6.77665
20q13.12	NM_022358	60598	KCNK15	potassium channel, subfamily K, member 15	0.699681	-0.515231	0.0132947	0.247405	1.65179	2.21835	1.59356	1.61814	1.72517	1.53135	1.46049	1.13283	1.29181	0.275673	0.362277	0.542121	0.902097	0.948977	1.25751	0.735105	0.915598	1.4351	3.6339	4.24648	5.24493	0.698758	0.509723	0.705236	1.70947	1.33655	1.40933	3.46092	2.90982	4.2026	16.0504	9.16718	7.65691	1.28015	0.964717	1.54254	2.45302	3.40693	1.53135	1.78719	1.94005
10q26.3	NM_006426	10570	DPYSL4	dihydropyrimidinase-like 4	0.724928	-0.464091	0.0133149	0.247405	17.9333	21.1557	16.1962	32.8144	29.2254	29.9467	20.3751	16.0049	20.4628	2.01876	2.92332	3.29667	14.5902	16.4468	14.705	9.4742	38.1928	12.092	41.3285	39.3592	45.1382	15.0043	12.7732	13.1626	26.3266	29.4683	20.8339	21.0614	20.9568	28.7824	28.2932	25.7412	12.1557	18.6142	17.7369	18.1176	16.3805	21.3943	15.5881	14.8317	15.9973
19q13.2	NM_203486	10683	DLL3	delta-like 3 (Drosophila)	0.676365	-0.564126	0.0133555	0.247564	2.89176	2.10163	2.51701	4.30921	4.6327	4.5541	1.37035	1.44217	1.47372	0.186993	0.483832	0.368781	2.86026	3.74186	2.84354	3.22981	2.70973	2.19949	3.37514	2.92707	3.65301	7.5525	3.98202	5.64163	4.12543	3.95742	3.31018	1.4563	2.78275	4.2338	2.16117	2.05566	0.239645	2.88593	2.68403	3.35971	2.47729	2.78689	2.78773	2.60665	1.61433
18p11.31	NM_001080209	645369	TMEM200C	transmembrane protein 200C	0.779093	-0.360132	0.0133731	0.247564	2.97957	2.31597	2.73204	3.22024	2.93381	3.1286	2.41895	2.41075	2.72328	0.891504	1.03418	1.25626	1.55096	1.90369	2.48935	2.88121	2.27262	2.04417	4.38363	3.82487	4.7219	2.43336	1.88357	2.19715	3.25807	4.02493	2.9982	2.82574	3.19304	3.33055	5.10921	3.67725	2.52542	4.04643	3.5395	4.0521	3.26931	3.31216	2.10258	3.36315	3.60768
9p13.3	NM_001207011	1271	CNTFR	ciliary neurotrophic factor receptor	0.802197	-0.317972	0.0134405	0.247612	18.1169	17.4797	18.9282	17.4459	14.3378	15.73	10.3069	11.5234	13.627	3.45849	6.46364	6.66193	12.5251	16.2608	19.0982	19.6053	27.6439	13.5455	19.3734	19.76	14.496	25.7137	15.5906	23.3053	19.0162	23.8599	21.9655	16.4449	17.3392	18.0541	15.712	20.3798	7.19036	16.7594	12.0213	15.7258	15.1716	14.5121	12.384	10.9234	12.418
1q21.3	NM_007185	11189	CELF3	CUGBP, Elav-like family member 3	0.658483	-0.602783	0.0134599	0.247612	9.83784	10.9847	7.42266	6.10986	5.7154	6.7347	3.17945	1.88004	2.64049	0.105737	0.329293	0.463893	7.15089	8.71323	10.7015	3.50162	4.54751	2.63464	9.50677	10.6381	11.7437	5.78122	4.16684	4.10815	7.34929	4.50196	5.5134	4.05983	3.62281	4.94093	7.38444	5.01411	3.12129	4.95483	5.63425	6.26695	3.60778	4.97142	2.70732	3.55707	6.30356
8q24.3	NM_003923	8928	FOXH1	forkhead box H1	0.754281	-0.406825	0.0134737	0.247612	2.39018	2.95802	2.13972	1.51768	0.902578	1.10041	0.813924	0.717039	1.18501	0.54944	0.474803	0.610119	1.86001	1.44913	1.81999	0.619712	1.04519	0.685967	4.24081	4.82758	4.76429	1.53637	0.97416	0.855655	3.49318	1.96622	3.71028	1.52587	1.21486	2.06092	3.01749	2.53891	1.05069	2.09204	2.15762	2.33929	1.24216	1.6669	1.79513	1.56302	1.75211
7q11.23	NM_004603	6804	STX1A	syntaxin 1A (brain)	0.77488	-0.367954	0.0134901	0.247612	8.30086	7.86392	6.88757	7.45148	6.88891	7.12512	3.05537	3.49916	4.77771	2.34939	2.90712	2.65336	8.04726	11.0294	10.8551	3.58486	5.78719	3.88456	12.5255	15.1751	15.2653	8.85772	7.80576	8.54528	7.60514	7.17942	7.01254	5.3257	5.59881	6.45175	6.71407	5.83252	3.11403	5.72672	6.6912	5.77869	4.20673	5.75403	5.3663	5.30643	6.94614
22q13.33	NM_024324	79174	CRELD2	cysteine-rich with EGF-like domains 2	1.14882	0.200158	0.0134998	0.247612	7.83732	8.7232	10.1527	13.204	13.1828	13.4196	12.4068	13.9353	17.8742	14.6844	14.5232	17.0122	12.1512	13.1727	11.6832	9.06243	11.2765	9.36862	9.44844	8.31285	8.29669	9.00128	8.17258	7.01566	9.45008	9.40277	8.13194	11.5135	13.352	13.0777	16.4235	14.6541	9.86724	10.6309	9.73814	8.6142	13.1487	10.1167	7.46909	10.2735	8.43767
4q12	NM_152540	152579	SCFD2	sec1 family domain containing 2	1.22287	0.290269	0.0135636	0.248327	5.73799	4.69325	4.49342	4.0364	4.21874	3.77135	4.59891	4.45939	4.86414	3.29808	3.32022	3.00421	3.4276	4.86296	4.9046	4.12029	5.15846	5.03662	5.81793	5.79263	5.04131	2.65758	2.64394	2.88891	3.65184	3.05315	3.13335	3.65789	3.04539	3.13776	1.28498	0.887403	2.73488	3.12061	4.67749	3.68278	3.1585	2.75209	3.24558	2.7467	3.0705
3q13.2	NM_001008273	29114	TAGLN3	transgelin 3	0.706248	-0.501752	0.0136321	0.249123	21.9483	30.1732	33.1258	43.5014	44.8905	44.1494	21.721	13.8919	16.4689	1.26973	3.739	3.86227	19.4227	19.8425	20.2163	28.2284	67.6809	18.7702	35.4054	28.6669	33.9935	13.2148	13.5399	7.33397	36.3854	54.2555	35.007	25.2196	28.0779	31.2655	29.128	30.3829	13.1235	23.1067	21.6734	19.0406	20.8466	30.3071	25.0355	18.2929	19.1232
17q21.33	NM_001018136	654364	NME1-NME2	NME1-NME2 readthrough	0.7451	-0.424494	0.0137074	0.25004	12.1871	11.5406	11.0868	10.1825	6.35114	4.27021	3.77394	4.48277	5.06078	2.62243	5.3721	2.26088	14.5574	11.1325	11.8088	7.3801	3.25565	5.53715	9.13874	11.3388	10.0773	6.5632	6.91823	10.1801	9.84211	15.104	9.56857	4.6307	5.06572	6.42751	6.11594	10.2159	9.33094	5.1157	13.8831	9.56366	3.85291	8.88151	6.91872	10.4276	11.4487
17q25.1	NM_018714	9382	COG1	component of oligomeric golgi complex 1	1.10452	0.143421	0.0137393	0.250166	8.14184	8.44688	6.41029	7.70558	7.79738	7.62458	6.83873	5.92954	7.97567	4.48261	4.62515	5.22685	5.72555	7.26734	7.04237	4.96573	7.33878	7.05823	5.28822	5.41701	5.56065	5.88655	5.34321	5.5781	5.54298	4.65118	4.81658	5.34575	5.8591	5.79823	4.56802	4.26115	6.13965	6.47633	8.44137	6.67137	7.06198	5.96763	5.44561	5.94808	6.60601
8p23.3	NR_003572	644128	RPL23AP53	ribosomal protein L23a pseudogene 53	1.35231	0.435429	0.0138099	0.250585	4.15342	3.3197	2.69691	3.19504	3.41423	2.98316	3.30828	2.96967	2.49809	3.64555	4.29156	3.80898	4.23424	4.37587	3.37255	1.24113	1.41969	1.63467	4.22567	4.19091	3.62858	2.29789	2.59673	2.31418	1.57221	1.09232	1.62986	4.64552	3.40701	3.39802	1.08479	0.925783	1.79611	2.81392	3.00434	2.83569	1.79083	1.42886	2.25651	2.20534	2.29188
12p13.1	NR_003932	387841	RPL13AP20	ribosomal protein L13a pseudogene 20	1.18494	0.244816	0.0138125	0.250585	7.21961	9.05369	15.585	6.50108	7.42564	6.43429	7.6093	10.0352	9.26097	7.74338	5.87807	6.71395	9.6519	6.6525	6.93462	7.46422	7.88748	6.96627	4.31937	3.60373	3.62326	5.19204	5.6224	5.80371	4.62956	6.19116	5.6718	4.97861	5.58532	5.2249	5.707	5.39928	3.35558	9.00552	8.11588	9.06389	6.16699	6.33445	7.83177	5.96374	3.85815
4p15.32	NM_015907	51056	LAP3	leucine aminopeptidase 3	1.14124	0.190608	0.0138542	0.250883	5.82492	4.40625	5.63087	7.91285	8.79557	8.99854	12.8181	13.1808	12.4245	10.4476	12.0656	11.4249	8.02441	8.82398	6.21758	10.467	10.3685	12.4878	6.56701	7.52883	5.70322	6.83584	7.59614	5.82993	4.74731	4.83727	5.53126	11.9222	8.71801	9.58488	3.5864	3.73539	8.865	7.41775	7.62837	5.6597	10.1243	7.67652	7.45124	6.3458	6.24509
19p13.2	NM_079421	1032	CDKN2D	cyclin-dependent kinase inhibitor 2D (p19, inhibits CDK4)	0.714892	-0.484203	0.0139175	0.251574	27.9237	25.9671	30.4779	20.0665	22.2068	19.0412	9.9606	9.30597	8.70094	2.12265	2.98771	3.23904	21.0379	20.1524	25.6568	8.56364	21.4659	9.19895	51.045	53.8424	50.8396	9.62894	8.06019	8.56967	22.5382	28.2384	22.564	14.7039	15.9477	17.9887	17.5959	18.8426	8.97167	13.5053	14.9922	13.314	11.4912	17.7404	12.5471	13.8113	19.3592
5p12	NR_073113	100652772	NNT-AS1	NNT antisense RNA 1	0.87871	-0.186541	0.0139596	0.251879	2.89581	2.2183	1.70564	2.53902	2.88301	3.1775	2.94532	2.71051	2.10908	1.68489	2.65239	2.48734	2.9808	3.03021	3.35063	3.11817	3.4726	3.24524	3.4426	3.5248	3.84751	3.99715	3.44581	3.74132	3.2813	3.57966	2.74267	3.14067	2.56596	2.34537	1.73295	1.48879	3.29767	2.88066	2.85952	2.80824	2.2919	3.06326	3.08929	3.08279	2.43886
Xq22.2	NM_152278	56849	TCEAL7	transcription elongation factor A (SII)-like 7	0.80137	-0.319459	0.0140139	0.252402	19.4221	12.8241	15.6081	23.3752	22.7669	23.1299	25.3003	23.2989	24.8534	5.16862	6.62044	6.02007	27.5834	29.7082	32.8492	18.8849	36.3042	21.279	42.7889	39.1328	32.705	17.516	18.1327	16.0889	19.0571	28.3092	24.0294	20.7224	20.0532	21.4025	7.37005	7.13807	9.00019	20.3559	18.6932	15.7974	14.8017	19.929	22.4726	14.3698	14.9479
7q22.1	NM_022574	64599	GIGYF1	GRB10 interacting GYF protein 1	0.870537	-0.200023	0.0141269	0.253868	5.27349	5.45277	3.7354	4.85473	3.99884	4.65472	4.12771	3.91587	5.47002	5.13203	4.03797	5.06411	4.3607	4.19997	5.43205	3.69658	3.96211	4.6696	4.91262	6.01459	5.739	7.05552	5.95158	6.80038	7.71978	4.356	4.77481	5.58246	5.48213	6.17219	8.9974	8.8971	6.31424	7.03457	6.0589	7.20379	5.86003	4.77744	4.65761	4.1805	6.00679
7q21.3	NM_006304	7979	SHFM1	split hand/foot malformation (ectrodactyly) type 1	1.08899	0.122986	0.0141462	0.253868	66.7487	49.8057	67.3217	49.0949	60.5812	53.9415	68.165	67.0011	61.3893	72.3035	80.9247	72.9262	54.4467	54.2616	38.266	54.1446	74.6225	96.2905	52.3753	40.4169	39.8724	50.6623	52.9725	56.3568	27.8898	22.1086	37.1251	78.8035	69.4856	69.9132	16.1014	17.1814	27.1409	52.7045	61.9461	40.9957	70.1615	52.5238	64.1785	50.0287	41.4057
17q25.3	NM_004104	2194	FASN	fatty acid synthase	0.842188	-0.247785	0.0142948	0.255316	34.2863	40.7096	32.0149	35.5811	29.9315	27.8756	16.0716	15.862	17.2982	11.3914	8.96875	11.1715	28.8979	31.8605	39.1248	10.7742	25.8777	20.7914	28.4041	27.229	34.4048	26.5784	22.2714	23.684	24.7445	25.1152	22.8206	16.5889	20.2326	27.878	33.6392	33.86	16.9681	32.2342	35.4404	39.9412	22.3305	28.5197	24.2794	20.8489	29.1034
21q22.3	NM_018964	54020	SLC37A1	solute carrier family 37 (glucose-6-phosphate transporter), member 1	0.762376	-0.391425	0.0142989	0.255316	2.82597	2.64599	2.20246	5.25346	4.26947	5.33194	2.8074	1.92394	2.61184	1.85001	1.46423	1.52549	2.86713	4.17488	3.52478	3.36026	2.76641	1.63175	6.46381	6.57274	6.90503	10.4849	8.17883	9.34558	3.90935	2.98799	2.65895	2.76054	3.18836	4.00056	3.93766	3.50239	2.63389	3.27364	3.33643	2.57953	3.15455	3.95306	2.66718	3.99142	4.56021
1p22.3	NM_012152	23566	LPAR3	lysophosphatidic acid receptor 3	1.48285	0.568376	0.0143372	0.255316	0.58725	0.294748	0.35195	2.00428	3.26784	2.43901	4.0355	4.02425	4.64682	6.8679	8.48698	6.32342	1.3705	1.44214	0.569619	4.19301	1.09803	2.26575	1.11104	0.620186	0.819063	0.973633	1.06206	1.03556	0.964691	0.3582	0.938876	3.48984	3.52649	2.20337	0.504558	0.76599	1.98095	5.042	3.71879	4.16526	3.85608	2.38398	3.57749	1.80942	1.18659
1q24.1	NM_019026	54499	TMCO1	transmembrane and coiled-coil domains 1	1.10325	0.141758	0.0143655	0.255316	9.65924	6.3945	9.25138	8.92375	12.7142	9.83699	11.9854	10.9183	11.4161	12.6121	14.702	12.6063	12.4616	11.3377	8.11335	13.119	10.5834	12.7673	9.21018	8.11094	6.861	7.36801	9.00445	7.83415	5.37972	5.87504	8.06651	11.8268	10.7287	9.98377	3.98805	4.11225	8.88218	9.9307	10.328	8.30951	9.5203	10.3643	10.9475	11.2703	7.28153
11q23.3	NM_001144759	23187	PHLDB1	pleckstrin homology-like domain, family B, member 1	0.867662	-0.204795	0.0143658	0.255316	7.86935	8.53026	6.73972	8.89773	8.31497	7.83132	8.65994	7.92943	8.91197	8.09198	7.78844	8.33457	7.0316	7.1038	6.05911	5.64457	9.33677	8.59376	8.78901	9.75851	9.46866	13.2398	11.487	12.8298	10.8108	7.39755	8.19896	10.2896	11.3423	12.7869	23.8913	20.5013	13.1844	12.4957	12.8568	12.7399	11.3364	9.71967	7.69825	9.12346	9.06341
1q24.1	NM_199351	387597	ILDR2	immunoglobulin-like domain containing receptor 2	0.751517	-0.412123	0.0143804	0.255316	3.68087	4.34663	3.15181	4.84185	4.14407	4.2333	4.67827	3.9917	4.15251	1.77353	3.89385	2.66175	1.40811	2.02351	1.59948	6.07206	4.53577	5.96649	6.85191	6.65424	7.25202	9.81679	9.93476	8.36023	10.021	7.65229	7.93265	4.48502	4.44931	5.56177	4.33427	4.0658	6.44057	3.99504	4.93114	4.27207	4.80266	5.3598	7.06458	4.94479	4.67067
10p15.1	NM_001353	1645	AKR1C1	aldo-keto reductase family 1, member C1	0.721293	-0.471342	0.0144223	0.255604	12.7096	9.60584	10.0733	10.7359	10.5808	13.6279	3.81072	5.73245	4.09115	0.884626	1.40038	1.80854	7.21549	9.14131	11.6521	5.99327	9.7228	6.52109	16.7577	15.9768	14.1263	6.50967	6.87715	7.14454	8.23786	9.2843	8.79772	6.36892	5.51814	7.93639	2.81757	5.65227	6.44365	6.69879	6.85259	5.62602	6.48657	9.13228	9.14295	9.84283	12.7583
22q11.23	NM_004327	613	BCR	breakpoint cluster region	0.88952	-0.168901	0.0145803	0.257947	10.9646	11.9843	8.38209	14.3301	12.4906	13.1474	9.42737	8.51094	9.94598	8.18665	8.07371	8.64146	10.2247	10.4574	11.8258	8.20581	9.47245	7.82454	16.1984	15.8574	18.5537	13.4352	11.0342	12.5875	13.1206	12.5762	11.0988	9.40893	10.301	11.6749	17.8991	17.0708	11.509	13.2145	13.9812	14.3533	10.9389	12.4924	9.90563	10.5133	12.5628
12q13.3	NM_004984	3798	KIF5A	kinesin family member 5A	0.723278	-0.467378	0.0146374	0.258237	20.5751	19.6344	7.93056	12.9598	10.6108	14.5666	9.19879	6.31743	6.88516	1.45262	2.48827	2.31318	7.99766	11.4159	13.1544	8.13057	12.4825	8.18725	34.5509	37.7941	40.6593	8.51738	7.77354	8.45377	20.525	14.4444	15.6357	10.7745	9.6806	10.1194	6.28868	6.49889	11.1658	9.47959	13.45	9.78653	8.68499	9.99076	10.3231	9.09685	13.9792
5q31.1	NM_016103	51128	SAR1B	SAR1 homolog B (S. cerevisiae)	1.1806	0.239519	0.0146558	0.258237	3.70375	3.43292	3.54791	5.5138	5.01018	5.76542	3.60762	4.51024	5.34055	5.6367	6.16576	5.47564	4.79429	6.00574	3.82729	4.33022	6.38981	4.70547	4.62913	3.6357	3.32641	4.18261	5.08319	3.72028	3.52348	2.73943	2.66333	4.16861	2.86945	2.96772	2.04899	1.07837	4.46973	4.62422	5.29338	5.5031	4.4046	4.17007	5.83146	5.06997	3.22366
1q23.2	NM_004371	1314	COPA	coatomer protein complex, subunit alpha	1.08165	0.113231	0.0146743	0.258237	25.3526	23.7778	20.1833	31.3237	32.4766	33.5589	38.9998	42.8933	39.7306	46.2553	49.5934	43.5085	26.4137	30.8863	20.6087	38.7737	44.335	51.545	25.0696	23.9652	23.7602	27.7327	28.768	27.4023	23.2834	16.4554	22.1801	38.6692	35.4056	35.7134	12.486	12.6071	24.2063	32.5872	33.5696	30.4034	44.3118	32.5311	34.4784	24.5632	24.0958
17q21.33	NM_016424	51747	LUC7L3	LUC7-like 3 (S. cerevisiae)	0.830887	-0.267276	0.0147978	0.259508	18.1694	13.2105	8.06587	7.18404	5.88862	7.83036	5.56706	4.89837	7.63987	7.68944	5.19373	8.05104	6.82507	5.60156	6.47601	10.2531	8.43598	15.5081	10.2135	14.9011	16.2331	10.3424	12.3037	8.19173	13.7849	8.23765	16.1459	8.94539	9.54683	8.47785	6.94858	6.51265	7.17595	10.3501	11.0034	12.1816	6.89529	6.2327	12.9278	9.39516	13.4657
15q25.2	NM_004644	8120	AP3B2	adaptor-related protein complex 3, beta 2 subunit	0.700484	-0.513576	0.0147986	0.259508	3.70504	3.42078	3.41394	5.0391	3.95679	3.4567	1.7292	1.52769	1.98577	0.366336	0.35397	0.590648	2.17913	2.59506	2.71242	2.53709	3.43472	1.27527	8.5032	9.53774	8.86536	1.9389	2.14403	1.77991	6.02139	3.95276	4.69823	2.38632	3.19335	4.01978	5.18761	5.10415	2.30724	2.90479	3.88863	3.5281	3.29584	3.25869	2.8959	3.94831	4.82538
15q12-q13.1	NM_000275	4948	OCA2	oculocutaneous albinism II	1.5792	0.659193	0.0149336	0.26095	6.45712	6.3541	3.9833	2.55816	1.77939	1.27376	7.36173	9.42347	8.83872	2.11678	3.32103	4.31495	3.66432	3.67018	3.73471	1.78347	2.81668	2.11198	0.348542	0.339323	0.379744	0.504004	1.03281	1.17371	0.792983	0.000365	0.530807	4.33385	4.11245	2.52493	3.36424	3.45066	4.93301	2.76789	3.17165	3.22489	3.59058	3.37534	1.16737	4.36879	4.43456
13q21.33-q22.1	NM_006346	10464	PIBF1	progesterone immunomodulatory binding factor 1	1.13518	0.182916	0.0149485	0.26095	8.19934	6.50562	8.17123	5.73964	7.73789	6.0913	7.96409	8.70223	7.15334	6.86523	10.4575	7.03836	7.12171	4.91025	4.51187	9.18578	8.40072	10.3673	7.59516	6.10598	6.81065	5.23793	5.73076	5.48726	4.19808	3.62149	5.89948	9.89153	7.24637	8.08299	2.91202	2.62182	3.44563	7.22978	6.88209	7.09072	8.95497	6.85555	9.67738	6.38169	5.98143
1q21.1	NM_006472	10628	TXNIP	thioredoxin interacting protein	1.12466	0.169483	0.0149592	0.26095	99.354	95.8407	92.3604	82.6258	101.833	100.66	113.504	102.861	109.723	124.815	141.579	123.504	76.1294	82.1683	68.7468	90.894	132.276	99.5958	75.1077	73.8878	64.3605	25.1375	28.538	22.5429	105.293	76.9642	125.191	128.117	112.314	110.04	20.0619	22.1154	57.4084	93.3145	95.6961	85.1063	130.898	115.644	143.677	63.5388	47.751
3q29	NM_001011655	93109	TMEM44	transmembrane protein 44	0.810003	-0.304001	0.0149937	0.261034	2.03347	2.63541	2.14395	2.70172	2.05722	2.46229	0.672537	0.000654	1.44515	0.763835	1.11635	0.637649	1.70908	2.21491	0.959516	2.12516	1.92762	1.81474	3.74696	2.85416	4.40417	2.14502	2.03102	1.03897	2.19786	2.01182	1.82847	1.97306	2.7733	2.43666	2.71759	2.66789	1.22252	2.47232	2.58272	2.68035	2.32548	2.3106	1.6257	1.90537	1.64937
6p22.3	NM_000367	7172	TPMT	thiopurine S-methyltransferase	1.18467	0.24449	0.0150164	0.261034	2.62634	2.4972	2.41032	2.33647	3.26372	2.28132	3.52967	3.25114	3.79401	2.96596	3.36503	2.78009	2.89567	2.22332	1.93856	3.94165	3.78746	4.15299	2.21488	1.65849	2.45154	1.79899	1.75672	1.98448	1.54747	1.07998	1.88675	2.73919	2.52909	3.16846	2.02886	1.40366	1.94703	3.41251	2.99442	2.94131	3.23204	2.48721	3.30495	2.44635	2.10914
19p13.12	NM_005858	10270	AKAP8	A kinase (PRKA) anchor protein 8	1.10354	0.14214	0.0150904	0.261865	4.60025	4.66807	2.92663	4.64378	4.13049	4.88428	4.0138	4.43454	4.37368	4.94902	4.25759	4.60826	3.40285	4.75025	4.0503	3.67027	5.27194	4.44862	3.92845	4.15953	4.25884	4.38817	4.39306	4.90829	3.93856	2.92257	3.39868	4.30791	3.36925	3.49372	2.42551	2.24718	3.59759	4.4861	4.71709	4.73469	3.96668	3.42897	4.23456	3.84013	3.43873
17q25.1	NR_038111	100507246	SNHG16	small nucleolar RNA host gene 16 (non-protein coding)	1.07342	0.102217	0.0151401	0.26227	33.0644	27.9481	30.6765	31.6988	28.8342	36.0496	50.1386	49.3363	45.0847	41.7428	45.8732	41.3273	27.7803	33.1914	33.1083	31.3109	35.594	36.2895	20.5438	18.5718	17.5396	33.1845	28.7957	30.9221	26.4714	28.1754	27.348	50.5941	41.2119	43.4517	19.1171	17.8241	49.37	39.3683	38.2623	32.5821	35.25	31.4282	32.36	29.1155	22.0712
Xp11.4	NM_001126055	8573	CASK	calcium/calmodulin-dependent serine protein kinase (MAGUK family)	1.2633	0.337201	0.0152473	0.26367	4.82893	2.68128	3.29315	5.02791	6.99295	6.22142	10.3624	11.0309	10.2759	14.4225	16.1933	12.9982	5.70107	6.15227	2.96283	9.16656	4.92787	6.83903	2.33197	3.25591	2.9407	4.63368	5.59364	4.95689	4.15378	2.02556	4.55239	7.50521	8.64214	7.00982	2.04505	1.71179	3.55687	6.07106	5.47136	4.98432	10.9482	7.41571	8.66356	7.08186	6.4409
14q32.31	NM_032630	51550	CINP	cyclin-dependent kinase 2 interacting protein	1.05543	0.0778293	0.0153562	0.265093	13.0884	10.7345	14.3101	14.6202	16.0082	16.0823	17.8445	17.3293	18.0734	14.6752	16.0053	17.3023	15.7545	22.5701	17.0954	15.6921	15.9613	14.1835	11.2533	12.1036	9.54761	13.2549	13.5354	13.1408	9.1901	12.8009	10.7251	14.5869	15.8527	14.433	9.37412	10.5494	11.4138	17.6103	15.2473	13.0487	17.9489	17.0244	13.9531	13.4457	11.5826
3q27.3	NM_173216	6480	ST6GAL1	ST6 beta-galactosamide alpha-2,6-sialyltranferase 1	0.80723	-0.308948	0.0154763	0.266133	2.49706	1.42806	1.21382	2.90774	2.50588	4.60664	1.75364	3.01202	2.43934	2.22174	1.68007	2.0711	1.90858	2.74284	2.63951	5.03508	3.15075	3.95798	2.26249	3.00758	3.17556	3.96592	3.72313	4.83686	2.66806	2.55464	1.99524	3.028	2.76523	2.78501	3.17252	2.76372	5.02301	3.80755	4.09191	3.63179	1.43285	3.39715	2.58326	2.49929	1.95656
17q25.1	NM_015167	23210	JMJD6	jumonji domain containing 6	1.17115	0.227929	0.0154884	0.266133	10.4403	11.8698	9.17803	6.33863	6.6075	7.62361	5.27536	6.37734	6.52519	6.07666	6.14846	5.73351	6.40806	8.0439	7.5386	7.29579	8.94076	5.83478	3.64674	3.80776	3.48468	7.13311	6.56049	9.1326	3.3033	5.19998	5.43224	5.47773	4.40912	5.21418	2.4426	2.50817	3.80256	7.20744	8.27573	7.22967	4.97375	4.376	5.61293	6.44441	6.3159
17q23.1	NM_016077	51651	PTRH2	peptidyl-tRNA hydrolase 2	1.16852	0.224677	0.0154978	0.266133	9.1334	7.39606	8.04738	10.0726	10.9723	10.3647	6.65161	8.21446	7.37553	8.69858	9.68327	9.40806	11.3219	14.6118	9.58778	8.75719	10.2842	10.5783	8.87243	7.67054	7.40036	6.72296	6.47813	7.62843	5.80666	4.56594	8.16348	9.4304	7.10378	8.08188	2.5709	2.20028	3.53818	8.37911	8.96086	6.64766	6.75054	5.81307	7.74609	7.36043	4.98799
15q21.3	NM_015617	26108	PYGO1	pygopus family PHD finger 1	0.899475	-0.152845	0.0155231	0.266133	5.5291	3.25346	2.85679	5.97959	5.54697	6.08387	6.53637	5.22039	5.98494	6.27469	6.99345	5.88088	6.70308	6.59389	5.66544	6.17424	4.84585	6.10732	8.00926	8.23554	7.02709	5.6239	6.40496	6.18421	5.85986	5.87663	7.44561	6.12441	4.98458	5.12056	4.00141	3.43714	9.02086	5.85111	6.68093	5.95384	6.0419	7.32025	8.26863	5.68277	5.92997
9p21.1	NM_002197	48	ACO1	aconitase 1, soluble	1.13633	0.184386	0.015634	0.267137	6.19461	6.1566	4.92091	7.94519	7.88665	9.80599	9.85188	11.1678	10.3276	13.8455	15.8248	14.8167	7.60313	10.4423	7.1949	9.69117	10.1003	10.3037	5.28976	4.53704	4.78951	9.75116	9.21575	9.95004	5.86485	4.84534	5.85227	9.65553	8.0526	7.99505	2.97516	3.22029	8.79102	8.856	8.28059	8.45023	10.6726	7.5533	8.30553	8.44361	7.02878
22q12.1	NM_002430	4330	MN1	meningioma (disrupted in balanced translocation) 1	0.768654	-0.379593	0.0156352	0.267137	5.19531	6.96968	5.07859	6.11814	4.13508	5.05531	3.67379	3.09927	3.58013	2.61799	2.77359	2.51227	4.54044	5.21227	4.86048	4.12776	6.88816	3.96203	4.91887	5.09971	6.3958	4.3214	3.9505	4.30824	12.7373	13.4493	11.0679	4.64826	5.5906	6.66057	6.79916	6.14096	4.43085	6.32092	6.22492	7.27801	4.78038	6.56283	5.40719	2.75881	2.95165
3q24	NM_021105	5359	PLSCR1	phospholipid scramblase 1	1.52108	0.605091	0.0156769	0.267392	1.26622	0.801957	0.971998	1.72812	3.28631	3.08631	6.59195	5.11055	5.19748	6.66597	8.26118	6.42231	1.61958	1.67264	0.928955	4.7859	3.01067	3.47677	0.443846	0.343347	0.407786	4.11036	4.10742	5.12247	1.86487	2.15259	1.80212	0.02552	0.085629	0	1.24874	1.57881	2.70208	3.44883	3.24566	3.29336	5.62895	2.70737	3.23644	2.29727	1.10966
1q21.2	NR_111951	57234	LINC00869	n/a	0.760811	-0.39439	0.0157382	0.267775	1.31368	0.163921	0.809025	1.89827	2.22806	1.54869	1.40639	1.93476	1.82927	1.36909	1.49173	1.54557	1.50216	0.983001	0.325903	1.44344	1.49865	1.82004	1.13756	1.27529	1.04037	1.90615	1.25554	2.09355	1.29405	2.41645	2.32119	2.16688	2.28089	3.50056	2.60277	3.41046	1.08198	3.14136	2.78326	2.62989	2.37249	2.78826	2.37436	1.44187	2.48684
3q13.33	NM_173825	285282	RABL3	RAB, member of RAS oncogene family-like 3	1.18563	0.245651	0.0157699	0.267775	2.27424	2.5276	2.69655	3.15695	3.00926	2.99038	4.37249	4.86782	4.38653	4.26884	5.09027	4.17385	2.81466	2.51672	1.61855	3.51018	3.86939	3.58485	4.6592	3.90938	4.00197	2.28108	2.40456	2.27625	2.72388	2.73937	3.63997	4.07262	3.20632	3.40094	1.68387	1.58829	3.07868	2.53919	2.70012	2.33728	3.55098	4.17373	3.90448	3.01957	2.55088
7q31.1	NM_000108	1738	DLD	dihydrolipoamide dehydrogenase	1.12039	0.163995	0.0157799	0.267775	9.04334	6.40891	6.94855	10.0743	11.981	10.7584	12.7703	13.6305	12.5465	12.354	16.2525	12.8076	13.5735	12.1881	7.86516	10.8062	11.4108	14.2052	9.22313	8.12055	9.43173	8.37133	8.36888	8.32136	6.62687	4.49334	7.509	11.09	11.5106	10.6106	5.17075	3.56722	4.41969	9.55387	9.35056	7.50578	11.5568	12.0129	12.3451	10.1903	8.90252
17p13.2	NM_016041	51009	DERL2	derlin 2	1.1132	0.154709	0.0158308	0.267892	12.6461	12.462	12.1653	16.0352	19.7411	20.2254	19.9906	18.9044	19.2264	31.4482	37.8951	34.1007	21.3428	23.1933	16.9558	23.5803	17.5328	15.3837	12.7067	12.3807	10.611	20.5799	18.9388	20.3933	13.515	11.782	12.3964	21.6414	21.1866	18.5218	14.0914	11.0804	13.7733	17.4879	17.8692	13.5056	18.6774	15.0553	17.43	15.2617	12.1989
2q11.2	NM_145212	51263	MRPL30	mitochondrial ribosomal protein L30	1.07858	0.109128	0.015871	0.267892	7.80318	6.21144	8.05423	8.41784	8.55538	9.1693	9.56156	9.96818	10.2365	8.22353	9.71162	7.69003	8.43058	10.21	8.71058	8.19307	10.8769	9.60332	7.55481	7.75002	6.73754	5.90749	7.04152	7.00921	5.15144	7.1422	6.82974	8.37177	7.5701	7.89221	3.83111	4.16681	7.85741	8.36094	7.77502	7.0982	9.54058	10.0185	9.39472	7.08624	5.3684
1p34.1	NM_020883	57643	ZSWIM5	zinc finger, SWIM-type containing 5	0.800625	-0.320801	0.0158819	0.267892	2.16735	2.45859	1.49056	2.93474	2.47249	2.97342	2.21297	2.08521	2.06774	0.818213	0.703274	0.879517	1.76833	2.21324	2.35719	2.10964	2.61895	2.13893	5.09192	4.58533	5.11127	2.84604	2.90917	2.89363	3.78683	3.46297	2.89448	2.04106	2.1715	2.30893	2.15123	2.12123	2.97199	1.71759	2.18267	1.83251	2.11918	3.20945	2.06911	2.19461	2.55189
17p13.3	NM_052928	114826	SMYD4	SET and MYND domain containing 4	1.17065	0.227314	0.0158942	0.267892	2.31455	2.58896	1.95235	2.9044	2.50305	3.42543	2.88616	2.87345	2.98671	3.66671	3.47466	3.52648	2.14108	3.69529	3.03898	3.30006	3.49255	2.62371	2.83063	2.83365	3.00996	2.88638	2.99525	2.90207	3.08125	1.78798	1.67262	2.9896	3.09592	2.52076	1.66787	1.88902	2.83849	2.19608	2.31257	2.62835	2.72374	2.22468	2.16008	1.98385	2.09715
8q22.1	NM_203390	389677	RBM12B	RNA binding motif protein 12B	0.908071	-0.139123	0.0159403	0.268216	8.46812	6.71385	4.74664	5.5469	5.5789	6.26201	7.49933	5.79186	5.78919	5.9306	7.39403	5.82218	7.04992	7.37323	6.51994	7.40347	7.98386	8.06063	8.4248	8.6312	8.35959	7.04208	7.73501	6.13557	7.37518	6.63392	8.24097	8.38771	6.33768	6.27328	4.21168	3.69056	4.95188	5.86943	6.45729	6.95378	6.64815	6.56172	7.80919	6.29543	7.2222
6q21	NM_016262	51175	TUBE1	tubulin, epsilon 1	0.900503	-0.151197	0.015987	0.268284	3.45319	2.52349	3.56919	3.39852	3.62381	2.82365	3.40114	3.8469	3.02296	3.27387	4.21069	4.18764	2.79661	2.81711	3.74251	4.74367	4.5997	4.16094	4.6223	4.11694	3.88883	4.65392	4.422	5.37251	3.38821	3.05396	3.92415	4.47935	3.91508	4.455	2.3651	1.87679	3.76747	4.03043	3.73597	3.33624	3.96074	3.68231	4.15072	4.4707	3.88643
11p15.2	NM_001144061	1315	COPB1	coatomer protein complex, subunit beta 1	1.17272	0.229858	0.0160361	0.268284	15.7212	7.40802	18.3611	18.6894	19.8131	15.6919	24.6196	26.6826	21.4041	32.6551	36.7545	30.5113	17.2812	22.2963	12.2202	21.1766	23.9785	27.0084	11.1503	11.6577	10.1871	15.0333	15.164	14.6113	12.1361	8.38894	17.6294	26.928	25.5468	24.5247	4.93713	6.64756	10.3425	18.7781	16.9369	16.4036	29.2296	21.8916	23.8849	14.8366	10.0098
22q11.21	NM_002688	5413	SEPT5	septin 5	0.798187	-0.325202	0.0160456	0.268284	45.7793	50.1446	40.7483	30.8594	29.6477	28.2285	24.4003	21.025	22.0926	6.1162	5.86468	8.34449	37.1545	34.7674	42.9316	12.2255	26.1259	16.0786	68.9229	66.5471	67.1127	23.1898	19.9872	16.9147	35.1082	33.319	30.1025	25.2465	25.795	30.9211	48.8371	41.965	25.3216	25.2891	31.1228	28.8116	21.9526	29.7252	18.0586	29.0875	35.4567
14q32.2	NM_016337	51466	EVL	Enah/Vasp-like	0.929812	-0.104989	0.0160535	0.268284	45.5601	47.5255	32.9133	62.4402	54.9603	62.86	39.246	39.3025	40.7994	29.85	28.8882	35.4288	39.9132	40.1199	43.7191	37.0575	46.743	30.8156	66.4926	64.641	66.395	38.3178	34.1208	39.7396	55.923	56.7047	49.1825	46.2912	41.1086	46.6183	61.3433	64.1537	37.9158	50.6059	53.0903	50.4338	42.9012	54.3612	42.2962	41.0667	44.2015
10q23.33	NM_022451	64318	NOC3L	nucleolar complex associated 3 homolog (S. cerevisiae)	1.2461	0.317414	0.0161201	0.268284	4.47231	3.27812	4.58088	3.43863	4.59045	3.99184	3.98992	4.3571	4.72057	4.94623	6.79512	4.86404	6.40046	5.65559	4.3789	6.89733	5.62709	6.00992	2.79336	2.90348	2.67116	3.85441	4.52753	3.70302	2.99043	1.94086	3.38025	4.7973	3.80686	4.05403	1.65488	1.47878	1.68139	3.83801	3.62396	3.27421	3.65048	2.99612	4.65584	1.95953	1.68222
16p11.2	NM_145239	112476	PRRT2	proline-rich transmembrane protein 2	0.672522	-0.572347	0.0161266	0.268284	12.2439	13.5321	9.02124	10.6968	8.54489	10.6949	4.74814	2.36634	4.28016	0.623404	1.20264	0.632561	6.64973	6.67304	8.73253	4.90705	3.23108	4.14896	14.8036	13.2609	15.4051	6.65693	3.1169	3.11091	13.3157	10.7564	10.3483	7.02226	6.73914	7.64195	15.4466	9.58774	6.54349	9.11636	9.28959	11.3321	5.27538	8.16177	7.06662	7.64039	11.1055
3q12.3	NM_000986	6152	RPL24	ribosomal protein L24	1.02318	0.0330583	0.0161372	0.268284	902.549	732.482	1116.21	981.161	1009.92	971.506	926.035	993.272	1020.25	848.88	923.844	907.75	1037.82	1112.55	1022.8	912.123	941.032	882.138	616.097	542.462	474.123	853.662	762.784	800.753	565.709	781.849	680.744	993.005	955.652	988.082	617.341	680.397	385.886	1079.94	1048.37	920.404	865.797	901.251	972.402	708.672	641.833
15q15.1	NM_001114633	100137049	PLA2G4B	phospholipase A2, group IVB (cytosolic)	0.756695	-0.402216	0.0161594	0.268284	3.25943	3.71973	2.72237	2.08197	2.33193	1.42985	0.561873	0.490597	2.53457	2.4348	1.43287	2.09754	2.00436	0.980602	1.36204	1.07205	2.5746	1.38228	2.95399	4.2694	3.48021	3.77799	3.3386	2.2929	5.35404	1.39763	3.39063	3.55198	2.36231	3.59315	5.48036	3.37612	2.34346	3.13289	3.33701	3.96801	3.18306	2.24554	1.9879	2.20787	3.90248
17q11.2	NM_001098507	7756	ZNF207	zinc finger protein 207	1.05831	0.0817614	0.0162005	0.26852	23.305	19.2958	24.3311	35.2915	31.8792	40.0836	34.902	30.1525	41.1244	26.337	29.1622	25.7205	27.4801	33.41	24.5724	24.153	47.0797	40.1228	19.2971	18.8661	17.239	28.5131	25.9976	24.0253	23.4565	22.4871	22.7822	31.7618	28.3738	30.1565	13.4301	12.7719	28.1258	27.2968	30.8056	24.9182	32.662	28.1758	28.0986	17.5433	21.656
7q11.23	NM_005685	9569	GTF2IRD1	GTF2I repeat domain containing 1	0.887452	-0.172259	0.0162356	0.268656	8.7942	8.97315	6.36478	9.65731	9.48317	7.99674	9.13199	7.56364	9.95503	9.06258	7.39834	9.32747	8.34975	8.96589	6.99509	9.02629	9.64401	8.35178	8.49106	8.43925	8.76511	9.55414	7.50513	9.26263	8.5583	5.9873	7.83889	10.0848	11.4672	12.8806	18.2459	13.8066	7.42932	13.324	14.4009	14.9452	10.0436	13.6259	9.03817	10.4636	11.9243
5q11.2	NM_001102575	112574	SNX18	sorting nexin 18	0.908156	-0.138988	0.0162989	0.26892	3.47581	3.01476	2.193	3.89073	4.20753	3.83867	4.13813	4.31596	4.59764	4.267	4.76935	4.84712	3.55993	4.28578	3.96137	5.00507	5.4138	5.4125	4.35382	4.42336	4.4359	5.15599	4.85285	6.0532	3.51496	3.79679	4.26423	5.90128	3.62527	4.13094	3.65827	2.83901	6.3024	4.498	4.6253	4.11926	4.88789	4.42452	4.52721	4.75904	3.88936
15q11.1-q11.2	NR_036432	283755	HERC2P3	hect domain and RLD 2 pseudogene 3	1.36078	0.444434	0.0163359	0.26892	7.06867	6.76982	3.95235	5.1788	4.94428	5.55085	9.73995	8.22585	8.77824	10.2594	12.3598	10.3277	3.7206	4.26139	3.62343	4.62385	3.47665	3.21407	6.18457	6.92742	6.49895	7.48187	7.47972	6.60534	4.07875	1.94212	2.96087	7.62099	6.23522	6.62	5.01315	4.93373	10.2429	5.3265	5.87807	6.31245	2.89647	2.58296	3.27312	9.64229	10.9452
3p21.2	NM_006010	7873	MANF	mesencephalic astrocyte-derived neurotrophic factor	1.06553	0.0915731	0.0163579	0.26892	27.9725	20.5063	22.7444	30.4097	34.9321	32.8046	34.0695	35.9457	36.7804	34.3267	37.9442	38.8725	26.6271	31.889	21.8762	45.1589	41.3011	41.0356	21.4415	17.3384	17.271	23.5084	23.4759	25.835	14.9248	23.8701	19.1055	33.4319	28.4634	27.3317	14.4638	15.3076	23.4437	28.7775	29.0444	24.3354	35.3778	23.3821	30.0219	34.5327	25.9051
7q22.1	NM_133457	136227	COL26A1	collagen, type XXVI, alpha 1	0.734108	-0.445936	0.0163896	0.26892	5.06846	5.49911	5.15487	5.60254	5.5853	5.09182	4.05787	5.25688	5.04629	1.08001	1.4639	1.08585	6.42468	5.16936	3.87296	3.42189	5.24532	4.53011	6.18914	5.01846	5.62037	2.11005	2.56794	2.22453	5.63075	4.97931	5.02978	5.29543	6.93498	6.67333	10.2967	8.71627	5.08033	7.53034	6.87591	7.93847	6.39436	9.79982	6.09751	6.30884	5.61763
15q15.1	NM_015497	25963	TMEM87A	transmembrane protein 87A	1.13662	0.184755	0.016467	0.26892	11.9422	9.4788	11.3537	11.3269	12.7661	13.426	11.0293	12.1359	12.4235	13.6739	16.6158	14.2367	13.147	13.2352	12.6319	13.6571	12.8078	14.6371	11.533	10.2331	9.56382	10.1621	12.3013	14.9179	7.19193	9.21686	9.1211	13.1113	11.6805	10.0338	4.21055	4.14528	12.5813	10.4616	12.0371	9.7275	12.6508	11.3491	13.4326	7.15431	6.23061
16p13.13	NM_014153	29066	ZC3H7A	zinc finger CCCH-type containing 7A	1.13826	0.186835	0.0165456	0.26892	8.318	6.31771	6.07487	7.93196	8.47023	7.78921	7.86384	7.73691	6.94636	7.79964	10.3672	7.72653	7.97296	7.65991	6.38475	9.30883	7.95873	9.57449	5.19756	6.38654	7.65299	7.25199	7.23579	6.57556	5.70445	4.03123	6.94795	6.74253	6.74614	7.80409	2.19054	2.94593	2.58911	6.77742	6.79411	7.08871	8.3351	7.80796	9.99727	4.89769	5.95862
19q13.33	NM_032712	84798	C19orf48	uncharacterized protein C19orf48	1.21624	0.28243	0.0165611	0.26892	11.8741	12.7435	17.7135	19.3017	20.1529	23.2602	18.8236	21.6863	19.2131	29.847	23.3592	26.0359	20.9327	19.875	17.357	15.7172	22.2333	16.6163	7.00861	7.61126	6.96689	10.4307	7.39142	9.42817	16.322	16.8938	10.3596	18.4139	24.8409	25.6394	14.3047	16.5247	9.2821	16.4355	18.6757	19.0737	29.5737	19.4871	14.2665	5.36261	4.29232
14q11.2	NM_005407	6297	SALL2	spalt-like transcription factor 2	0.85676	-0.223037	0.0165642	0.26892	10.4233	11.4793	8.28109	15.3384	11.0274	13.887	12.5845	10.3493	12.0068	6.19985	6.843	6.7232	7.37011	8.59055	7.1363	10.1879	17.7769	9.50885	13.4833	12.9771	15.3196	12.5511	11.3577	11.9439	19.5342	18.045	14.6517	10.8444	10.7287	13.196	17.329	16.506	12.1158	11.4475	13.1922	12.5849	10.2436	10.6928	9.45897	10.7485	13.147
1q21.1	NM_003846	8799	PEX11B	peroxisomal biogenesis factor 11 beta	1.15789	0.211497	0.0166072	0.26892	5.74205	4.38306	3.9199	6.91143	9.75769	6.86082	6.45988	6.88904	7.5046	5.74614	8.79522	7.59191	4.95596	7.51831	5.82934	3.63055	5.62254	2.91025	6.31824	7.63727	6.77572	5.72042	5.53219	5.62552	5.66414	5.08733	4.23131	7.70017	6.29178	5.86839	4.38275	2.18443	4.32564	5.35473	6.53845	3.89215	7.78529	6.25551	5.42617	4.46855	5.33725
14q13.1	NM_018453	55837	EAPP	E2F-associated phosphoprotein	1.08686	0.120161	0.0166228	0.26892	16.1743	12.496	17.8499	15.5984	19.1427	13.4574	15.038	15.8044	15.6147	13.6978	18.521	14.75	17.1354	14.8081	12.5723	18.1061	16.5388	19.4917	15.3793	12.3769	11.3007	12.4482	13.4159	14.9306	7.84825	9.4607	11.296	17.7097	15.6436	15.6316	5.52433	4.97099	10.4685	13.3845	14.3106	12.2287	16.1529	16.1233	17.2644	15.4457	10.6518
18q12.3	NM_020783	6860	SYT4	synaptotagmin IV	0.757711	-0.400281	0.0166489	0.26892	22.699	15.5327	18.3968	32.5928	44.3583	44.3047	13.426	12.1061	9.43357	3.52279	5.90603	6.02675	17.6242	18.6717	16.4207	20.003	37.5303	27.1874	67.6603	65.2182	53.2954	12.3491	13.0775	10.9405	27.1265	32.4219	36.3238	19.3296	20.1775	23.4887	6.25429	6.00953	12.4824	13.8665	14.9989	13.4885	21.6974	32.6923	34.6607	28.3062	21.2647
20q13.12	NM_024034	78997	GDAP1L1	ganglioside induced differentiation associated protein 1-like 1	0.644582	-0.633564	0.0166493	0.26892	21.4558	23.4816	29.7333	22.0863	20.8974	18.5144	7.67184	7.05514	6.9218	0.155341	1.31618	1.09194	14.2971	12.7433	17.0867	6.68533	11.5219	4.8717	33.4107	27.7504	31.8362	9.741	5.83444	7.45815	14.5546	22.7063	17.3236	10.0206	10.9983	15.5121	14.0627	14.9646	5.20789	12.1818	13.5533	14.4726	11.4005	20.874	15.954	12.0066	13.9879
5p15.33	NR_125375	100288152	LOC100288152	n/a	0.747583	-0.419695	0.0166573	0.26892	2.07336	2.55473	1.31343	3.13196	2.64174	3.46898	2.20581	1.62315	2.6277	1.53249	1.09175	1.77616	3.68633	3.5849	3.95696	1.54766	1.51564	2.02562	5.00129	6.0806	5.58188	2.25867	2.43233	2.02988	3.18003	2.56805	2.89333	2.77848	2.78144	3.30406	4.31224	4.03553	2.38447	1.3213	1.28122	1.44077	4.52928	4.80848	4.22052	2.61383	3.81955
20p11.21	NM_021067	9837	GINS1	GINS complex subunit 1 (Psf1 homolog)	1.29636	0.374464	0.0167456	0.26892	4.12887	2.83873	2.83437	4.22786	3.41988	4.70015	3.52226	4.27854	3.32253	4.07565	4.55492	3.68311	4.00916	5.00207	3.62927	5.97037	7.3822	4.7101	3.32077	2.67034	2.54587	2.33918	2.89006	2.32191	2.99926	3.43783	2.94327	2.57136	2.74644	2.33864	0.965033	0.562376	1.48181	2.59231	3.36629	3.00311	3.67617	3.45987	3.10408	1.54878	1.25063
7p13	NM_000290	5224	PGAM2	phosphoglycerate mutase 2 (muscle)	0.708189	-0.497793	0.0167515	0.26892	0.732971	1.1288	0.491302	2.62267	1.99019	2.09924	1.46188	1.68893	1.90286	1.59273	1.45275	1.61978	1.05763	1.57786	2.19303	5.41923	12.1173	9.21541	1.62329	1.5177	2.3285	1.78625	1.73961	2.07712	4.98335	4.26982	4.53499	1.66405	1.51895	2.1934	6.58955	4.93585	3.79325	2.22116	2.06879	2.36038	1.52064	2.20979	1.59849	1.15539	1.36929
12q15	NM_001199302	4848	CNOT2	CCR4-NOT transcription complex, subunit 2	1.1496	0.201136	0.0167959	0.26892	8.46916	8.89926	9.30618	9.76756	12.9477	12.7937	12.8757	12.3926	12.3858	14.3241	17.4901	14.2892	11.3713	11.2717	7.95622	18.3213	14.579	18.2934	9.09054	8.94293	8.14306	10.0182	10.4213	9.4675	7.3042	5.52861	8.30744	15.1939	12.536	14.7404	2.89588	2.94827	4.74648	11.7874	10.1212	8.96481	12.566	12.2974	12.3934	9.74343	7.65084
2p16.1	NM_033109	87178	PNPT1	polyribonucleotide nucleotidyltransferase 1	1.13927	0.188107	0.0168137	0.26892	4.6528	2.73714	4.73342	3.22984	4.2966	3.40136	4.93875	4.91611	4.44669	3.92176	4.72078	3.65175	4.42493	5.02203	3.66023	4.7354	4.20458	4.59298	4.02532	3.30212	3.48245	3.25587	4.06379	3.84437	2.58032	2.02798	3.35093	3.93914	3.49095	3.64925	1.73955	1.80235	1.99545	4.02927	4.11312	3.70951	3.93342	3.88489	4.46562	3.53026	3.28875
12q21.2	NM_001321	1466	CSRP2	cysteine and glycine-rich protein 2	1.09908	0.136302	0.0168487	0.26892	66.0132	48.8146	64.1267	65.8207	81.5479	80.6601	96.3662	94.541	91.0814	238.803	242.499	246.685	134.327	143.407	129.372	135.754	88.2374	92.5993	44.0411	46.1938	37.2565	65.8965	61.6517	74.548	40.7323	57.0785	54.0662	128.98	100.692	96.2311	22.4535	27.2995	37.9663	104.647	102.024	77.6141	84.9262	68.3129	70.4597	63.3584	43.2569
19p13.12	NM_021241	58525	WIZ	widely interspaced zinc finger motifs	0.863631	-0.211513	0.0168541	0.26892	6.83823	7.58587	5.1815	8.85658	7.4434	8.1287	6.73426	6.19937	7.75074	5.2872	3.98427	5.16108	5.89197	6.00761	5.69693	8.13716	6.8036	5.13543	8.04492	8.56799	10.3465	7.78623	5.82932	7.59397	9.16401	8.05307	7.45049	6.44882	7.39218	8.69017	13.2175	10.9426	5.59086	9.53326	8.466	9.81651	7.73467	9.28077	6.20784	6.0635	7.55886
20q13.2	NM_006526	7764	ZNF217	zinc finger protein 217	1.20776	0.272338	0.0168616	0.26892	3.77901	2.99363	2.44978	4.32633	4.78173	4.43118	8.36697	8.52891	7.75834	7.8373	8.98916	7.18154	3.43733	3.23141	2.00367	6.74043	3.88463	6.2391	2.67902	2.62579	2.62251	4.55193	4.78969	4.61042	3.50256	2.59028	3.47225	5.85265	4.6413	5.22933	1.95442	2.35339	4.37472	6.25965	6.25441	5.79158	6.4703	5.78085	6.29465	6.16133	5.82229
14q32.2	NM_173701	7453	WARS	tryptophanyl-tRNA synthetase	1.12426	0.16898	0.0168629	0.26892	10.0552	11.0058	7.36564	13.9918	14.1633	14.4208	17.9886	22.0533	19.7232	22.147	18.1474	20.6137	12.1319	12.5278	10.4744	17.0683	25.3259	14.6417	12.3386	12.9121	11.1826	12.9424	10.3922	14.514	8.03849	11.5032	8.46689	14.71	16.5598	13.4374	5.94181	6.64945	13.0054	14.0044	13.2149	8.7648	27.8687	17.1628	13.5796	11.0162	9.36023
11p11.2	NM_006034	9537	TP53I11	tumor protein p53 inducible protein 11	0.798736	-0.324209	0.0168712	0.26892	13.6353	13.7518	13.8208	12.5182	7.65269	12.4167	11.5453	9.78901	8.60933	3.69974	3.97767	3.99545	18.048	20.08	19.4558	9.49179	9.92039	11.4224	7.66774	6.01915	8.28254	15.8798	13.3624	19.0379	8.26549	7.81438	8.29575	7.84121	9.15164	10.2877	19.5821	14.5151	8.99157	16.2573	18.3385	18.3277	8.96224	9.67541	7.58385	13.0055	11.4948
14q32.33	NM_015197	23241	PACS2	phosphofurin acidic cluster sorting protein 2	0.851636	-0.231692	0.0168953	0.26892	9.19816	8.35342	8.52631	12.3052	9.74453	9.30299	8.86277	7.73754	7.56483	5.55304	4.91635	6.89067	9.51563	9.17627	8.91385	5.84501	9.17042	5.83989	15.1107	15.4514	18.2026	7.80063	5.81344	8.33753	11.9203	10.4703	9.39587	9.00488	10.1154	12.3921	19.3784	17.2472	8.32813	8.58916	9.27644	8.20062	9.57929	11.2994	8.40476	8.70919	10.0231
18p11.32	NM_005151	9097	USP14	ubiquitin specific peptidase 14 (tRNA-guanine transglycosylase)	1.09855	0.135602	0.0168985	0.26892	8.3515	5.79734	6.60788	9.47436	8.84432	9.33451	8.26172	8.09207	7.56586	7.18524	8.94845	7.53295	9.24862	8.96711	6.71743	7.41524	8.328	9.38522	6.03268	6.14135	6.87666	6.00829	5.99286	6.04434	4.63433	6.72302	6.16822	5.70077	7.18037	7.49036	3.76189	3.75227	5.47867	7.53439	6.70109	6.78239	8.65098	8.56931	10.7219	6.11848	5.81246
5q31.3	NM_003883	8841	HDAC3	histone deacetylase 3	1.07566	0.105221	0.0169409	0.269167	13.5479	13.8857	11.4296	18.9849	18.6261	19.4277	21.1482	21.0927	21.2208	16.7748	18.2126	18.8397	17.235	18.4182	15.5091	14.2343	26.3136	16.1939	17.1426	15.8491	14.6009	14.5116	12.3475	12.6422	15.2835	13.194	12.055	17.9476	17.2166	16.4188	16.4368	14.6215	14.2545	14.8984	15.8385	12.5514	18.748	15.8572	14.2384	11.8325	11.5309
19p13.2	NM_058164	93145	OLFM2	olfactomedin 2	0.719926	-0.47408	0.0169887	0.269427	23.887	23.3046	21.8053	23.132	22.9711	22.9348	12.9807	9.78718	9.43076	2.57504	2.76438	2.56933	18.0423	14.0343	16.7245	6.44369	12.6302	11.839	32.4789	33.0843	39.0566	8.36572	6.32112	7.22779	21.6223	25.3513	21.0597	13.0512	15.144	20.0158	33.2424	29.4445	14.7317	17.2167	18.3439	19.6101	18.3528	24.6482	18.0187	16.2514	19.2249
14q32.33	NM_001312	1397	CRIP2	cysteine-rich protein 2	0.787283	-0.345047	0.0170154	0.269427	33.1172	34.8971	34.1828	27.4604	27.4734	23.3616	19.9659	18.805	22.364	3.43338	3.82422	9.18959	27.245	26.8404	25.1843	19.4597	21.5229	14.4435	29.7114	25.0845	31.5273	20.3232	16.646	16.5024	20.3407	23.1083	17.519	23.3564	27.7995	37.3106	37.8663	30.2622	12.4212	23.9788	24.9333	26.5082	18.7411	28.9295	16.1152	28.8046	22.2332
10q23.2-q23.31	NM_004670	9060	PAPSS2	3'-phosphoadenosine 5'-phosphosulfate synthase 2	1.36449	0.448364	0.0170383	0.269427	0.792359	0.000238	0.852611	1.1384	1.98823	2.71029	3.67516	3.88022	5.13025	2.32461	3.74428	4.586	1.92147	1.73274	0.465794	2.50318	2.55003	3.11748	0.493569	0.480037	0.000329	2.00687	1.69701	1.59333	1.62479	0.937969	1.3001	2.16684	2.28488	1.74086	1.26532	0.542132	2.76236	1.60341	1.82027	2.49223	1.97408	1.36049	2.65647	1.62838	1.27771
11q12.1	NM_002559	5024	P2RX3	purinergic receptor P2X, ligand-gated ion channel, 3	0.677835	-0.560994	0.0170805	0.269609	0.78572	0.658538	0.899721	6.64388	8.1104	9.70832	2.53679	2.56513	2.61524	0.755891	1.01386	0.752901	2.55919	2.34127	2.35157	8.62619	4.71252	8.48256	3.02719	2.74892	3.56404	8.09777	6.56635	7.52635	2.36657	2.20271	2.07865	2.62789	2.3044	4.43732	4.6048	5.42137	4.27233	5.57132	4.68318	4.91767	6.47851	5.35694	6.3483	1.9178	1.551
22q13.33	NM_012324	23542	MAPK8IP2	mitogen-activated protein kinase 8 interacting protein 2	0.724319	-0.465302	0.0171163	0.269609	9.52464	10.8095	8.79684	9.84921	8.56208	10.0991	4.552	3.84053	5.00872	1.34048	1.44399	1.29423	6.53135	6.45382	7.09259	5.44621	5.84048	3.20755	13.8617	12.8785	17.1647	6.3688	4.51832	4.69149	10.7945	11.0457	8.05213	6.06782	7.38882	8.94992	10.1523	9.22482	4.35974	6.27426	7.43421	7.55981	5.52257	9.45345	6.3584	6.20832	7.96487
8q24.3	NM_012162	26233	FBXL6	F-box and leucine-rich repeat protein 6	0.787248	-0.345111	0.0171309	0.269609	0.413561	2.44626	2.54868	2.40092	1.36927	1.10003	1.23523	1.62083	2.96479	0.891197	1.53957	1.51472	1.33946	1.7983	3.01526	2.12661	2.10878	1.83614	2.11725	2.83101	1.97624	0.966222	1.4047	1.72572	1.16274	1.55542	2.05409	2.05834	2.42923	2.304	3.82954	3.02326	1.88636	2.53489	2.5919	3.52267	3.41919	2.9099	2.33955	2.45554	1.9999
11p13	NM_024662	55226	NAT10	N-acetyltransferase 10 (GCN5-related)	1.11091	0.151747	0.0171753	0.269882	6.8331	7.86776	4.80894	7.88276	6.96753	7.78447	8.24228	8.24814	9.5155	7.49784	9.21898	8.15371	7.00244	9.91966	7.56488	7.78462	10.0407	10.0238	6.50063	6.88343	7.21282	7.64687	7.64672	7.14455	6.71709	3.64771	5.49301	7.56173	6.49054	7.35421	3.62122	3.23335	7.08455	6.71764	7.64459	5.73645	7.87118	6.17804	6.92717	6.69534	5.81266
20p12.3	NM_019593	56261	GPCPD1	glycerophosphocholine phosphodiesterase GDE1 homolog (S. cerevisiae)	1.21661	0.28287	0.0173099	0.271569	4.45146	3.77619	3.99783	6.74399	8.76481	8.2609	6.44598	5.7765	5.34807	7.76426	9.43085	7.7696	11.0722	9.66064	8.14943	6.26599	7.43383	6.24483	5.54432	4.70426	4.37066	4.39048	4.19724	4.26337	5.073	3.56837	6.12317	7.83002	7.51863	7.10164	1.58573	1.64759	2.89186	5.09718	4.66608	4.69921	7.53341	6.78235	7.88874	3.67213	3.4618
2p23.1	NM_024572	79623	GALNT14	UDP-N-acetyl-alpha-D-galactosamine:polypeptide N-acetylgalactosaminyltransferase 14 (GalNAc-T14)	1.40856	0.494225	0.017364	0.2719	1.58067	1.99253	1.37737	6.40797	5.73593	4.35067	8.21418	7.29166	8.56163	4.92662	4.36451	5.4531	4.56678	4.19874	4.51272	2.99054	0.908961	2.49186	1.08072	1.2699	1.64649	1.50181	1.20222	1.90386	0.666452	0.604252	1.20716	3.56639	4.69076	4.48288	1.71553	1.92338	1.37553	7.2485	6.85883	5.08722	7.39469	7.01209	4.40066	4.51621	5.03222
3q12.2	NM_001195478	10342	TFG	TRK-fused gene	1.14695	0.197805	0.0174048	0.2719	17.0799	12.4635	12.3994	18.9634	21.7368	24.6411	27.4064	25.9118	28.9746	32.9039	37.3283	34.7821	22.2634	24.228	17.5758	22.7519	24.8784	23.3081	16.0328	14.4544	9.72758	26.3512	21.1385	25.3711	5.49421	13.0345	15.2528	24.6692	19.0842	19.9771	11.6988	7.83662	18.1394	23.833	22.9872	21.0235	28.1345	18.7715	22.699	19.3486	16.1226
7q11.23	NM_031992	7458	EIF4H	eukaryotic translation initiation factor 4H	1.05478	0.0769454	0.0174328	0.2719	71.4643	68.2042	63.6128	80.7878	71.7565	87.8564	86.1856	93.4796	93.5551	92.3802	88.8579	95.9623	58.4956	83.7741	68.3214	79.9839	90.063	72.6993	70.451	64.5391	57.348	82.7883	72.4547	81.8906	55.6252	54.6581	52.112	86.8298	70.094	66.9037	38.5479	37.4427	69.8399	77.1461	82.8082	66.8454	79.3655	66.8574	69.0622	64.771	61.757
Xq28	NM_032512	57595	PDZD4	PDZ domain containing 4	0.687918	-0.539691	0.0174561	0.2719	34.5558	38.8031	34.2359	34.9699	32.1469	29.0442	12.9563	10.2449	12.0108	1.93378	2.55152	3.67421	26.101	24.0773	32.9282	5.83276	21.08	8.11372	64.5372	64.0638	73.0803	9.18682	8.11587	8.12109	33.1431	35.4553	29.5855	19.8569	21.4713	30.5169	31.4763	32.9092	13.6331	20.194	23.1009	24.8889	18.0146	29.3198	21.7937	22.0064	27.9499
2q14.3	NM_032390	84365	NIFK	nucleolar protein interacting with the FHA domain of MKI67	1.15257	0.204858	0.0174672	0.2719	11.9086	9.41383	14.1878	11.9711	15.6841	12.5463	11.329	10.6501	11.9773	12.3451	16.0539	13.6837	21.5983	19.2425	15.6564	17.3512	13.3241	14.848	10.166	9.00724	8.69448	7.44239	9.19986	9.65837	5.50559	4.72463	7.39304	12.1486	10.428	10.2189	4.07618	3.56588	7.38931	10.859	10.3947	9.64072	10.8566	10.5014	15.4832	10.6119	6.77441
8q24.13	NM_032026	83940	TATDN1	TatD DNase domain containing 1	1.15463	0.207427	0.0175884	0.271995	9.47614	8.24046	10.6309	8.48466	14.0162	9.55117	10.2925	9.93524	9.54329	8.75056	10.0102	7.82621	12.2392	13.4915	8.5854	8.32789	11.7466	13.8609	8.71547	7.39006	7.80334	6.04759	7.68809	7.72454	4.94681	4.7962	7.6348	10.323	9.71378	9.90715	2.77164	2.48947	4.19419	9.15003	7.82971	6.24323	10.8547	9.07446	14.4315	5.4523	4.64299
1p35.3	NM_016311	93974	ATPIF1	ATPase inhibitory factor 1	1.02415	0.0344272	0.0176781	0.271995	68.9949	56.354	93.7237	86.5874	97.7661	81.1071	106.761	110.223	115.36	67.7991	70.0558	76.2085	76.6083	82.1179	74.732	73.8211	87.2942	88.2592	65.6489	55.5795	57.9642	53.3446	51.9213	55.8597	55.0609	73.2962	60.8347	88.3662	83.514	92.4866	63.8878	50.0514	48.4368	84.7568	95.2985	70.0467	93.4599	90.191	70.0128	80.3965	66.6902
21q22.3	NM_006758	7307	U2AF1	U2 small nuclear RNA auxiliary factor 1	1.13134	0.178037	0.0176992	0.271995	14.2898	12.099	12.7959	20.8267	23.9094	23.8467	17.8149	18.8759	20.2213	12.6273	12.7609	11.5314	25.6055	29.8863	24.8676	13.6041	26.2892	18.0594	14.4956	10.0012	12.1176	10.0093	9.0648	12.2005	9.34871	13.8015	6.83169	11.3956	14.3616	18.2735	8.0211	8.8704	8.39127	15.3877	16.3501	11.6125	16.5962	10.1302	14.0071	9.2601	10.2114
6q22.1	NM_021648	23270	TSPYL4	TSPY-like 4	0.870798	-0.19959	0.0177074	0.271995	22.7164	20.1356	13.2822	21.4181	18.5917	21.1751	16.928	13.8143	14.1517	6.65408	8.76821	8.24132	15.945	16.4376	17.8571	13.7936	17.7793	15.1222	22.6705	24.172	26.3014	16.4131	14.4274	15.101	21.5479	22.912	17.8763	13.2416	15.1578	15.7004	16.9113	15.122	12.7129	17.2272	21.2352	17.7678	15.3472	19.2124	15.4881	16.1645	22.7948
20p12.1	NM_017714	55617	TASP1	taspase, threonine aspartase, 1	1.16738	0.22328	0.0177258	0.271995	3.92538	3.54199	2.91681	2.80277	3.41949	2.70061	2.69542	3.31083	3.49577	3.13354	2.63022	2.98125	2.28993	2.77156	2.75208	3.33308	4.14733	2.99312	3.77655	3.58373	3.61343	2.80544	2.55502	2.2118	3.22541	2.8653	2.48922	3.19883	3.49792	2.28816	1.49794	1.60578	2.85146	2.6585	2.74496	2.07328	2.62566	2.43723	2.42276	2.91733	2.39021
10q22.2	NM_007265	11319	ECD	ecdysoneless homolog (Drosophila)	1.12038	0.163988	0.0177405	0.271995	9.13395	7.58202	8.40596	7.25665	8.72923	8.56912	8.00992	8.07198	7.37877	8.81983	8.98772	8.37463	9.9906	8.94441	7.69335	8.83071	9.55628	10.2543	8.3255	8.36123	7.59924	7.0704	8.02277	8.12215	5.58821	4.81211	7.28992	9.22158	6.15391	6.85886	2.89293	2.49574	6.04083	7.37148	7.7438	7.03183	8.62978	7.56294	7.23194	6.17924	4.93981
1q24.3	NM_014283	51430	SUCO	SUN domain containing ossification factor	1.19769	0.260253	0.0177847	0.271995	23.6679	20.7996	23.0505	20.4386	25.5511	19.4919	14.4381	14.506	13.0808	11.0559	14.4693	10.8324	20.2771	23.0807	18.8458	15.1347	22.8445	20.9118	17.8859	14.7091	15.7737	6.32212	10.0382	9.28624	8.30726	6.99646	11.8915	15.9192	13.6051	13.4447	2.04219	3.48598	4.83432	13.9387	13.8198	12.7857	16.6349	13.1997	27.0078	8.02235	9.25941
10q24.31	NM_003393	7479	WNT8B	wingless-type MMTV integration site family, member 8B	1.65708	0.728645	0.0178129	0.271995	6.59923	5.69392	5.35057	6.59212	3.36101	2.58438	21.9532	14.3352	26.9785	0.605361	1.76237	0.756206	1.52697	0.627298	0.518719	1.27689	1.52503	3.02465	3.06867	4.38526	6.21379	0.338596	0.414773	0.440061	3.0917	2.13236	3.09777	2.08108	1.7534	3.77549	2.75276	2.87382	1.50862	6.07563	5.33554	3.3685	6.05157	7.57489	7.14999	0.806034	1.90198
7q22.1-q22.2	NM_002553	5001	ORC5	origin recognition complex, subunit 5	1.13957	0.188485	0.0178222	0.271995	5.90869	4.71705	6.72421	6.6138	7.14679	6.77662	7.08851	7.22232	7.77543	6.61581	7.22552	6.46087	7.36541	9.86477	7.11268	3.76329	4.92594	3.30681	7.82904	7.60336	5.39696	5.37845	5.7683	5.40839	4.44179	4.69487	6.43662	6.41659	6.28325	5.48708	2.16843	2.25677	3.84771	5.4232	5.71502	5.86171	6.86448	6.75805	6.36882	7.96856	5.01667
11q23.3	NM_005188	867	CBL	Cbl proto-oncogene, E3 ubiquitin protein ligase	0.876314	-0.19048	0.0178402	0.271995	4.61306	4.84113	3.16334	5.44286	4.01267	4.55255	4.899	4.05425	3.94078	3.28539	3.92915	3.03617	3.42672	4.22663	3.37251	5.17489	5.11845	5.16672	4.0159	4.41932	4.57472	5.45547	5.39077	4.99552	6.8086	5.00715	5.77785	3.56578	4.18393	4.42348	4.54227	3.77212	6.04186	4.63084	5.76635	5.76086	4.91228	5.5099	5.72235	3.72299	5.58552
9q31.1	NM_207299	54886	LPPR1	lipid phosphate phosphatase-related protein type 1	0.692191	-0.530758	0.0178537	0.271995	8.66951	7.5371	7.09681	7.15269	5.59614	6.76476	5.54272	4.87057	5.54335	7.7e-05	1.18229	1.05334	9.00199	11.5189	12.2151	4.27392	5.42166	3.76347	20.2054	19.7671	18.9149	4.5278	5.05375	4.52149	6.87554	9.10057	7.92159	4.89903	5.58204	5.14322	4.14716	2.82084	6.00477	6.05181	7.01636	6.23995	3.28445	6.18802	3.98704	7.76938	6.39872
10q11.22	NM_006327	100287932	TIMM23	translocase of inner mitochondrial membrane 23 homolog (yeast)	1.11125	0.152181	0.0178545	0.271995	14.3412	10.6637	10.1772	19.0735	20.9021	20.4983	18.8451	20.6537	19.0809	24.9586	25.9623	24.0675	21.7161	27.4861	19.3339	23.1563	21.2399	20.3617	18.0522	15.8215	13.3638	12.0493	16.172	15.617	9.55016	8.50274	10.6149	21.5653	17.3911	17.4837	7.78918	9.05258	10.4469	14.8199	14.8685	13.0359	20.8965	16.3784	14.5707	17.9284	13.2817
17q23.3	NM_020198	57003	CCDC47	coiled-coil domain containing 47	1.13607	0.184058	0.0178627	0.271995	12.3289	9.9333	10.4427	12.1416	16.2238	13.2145	14.2075	14.6671	13.7423	18.161	23.1993	19.4023	16.4387	15.3873	12.5748	15.5245	17.4522	20.8501	9.96286	9.95815	11.3465	10.6571	12.1701	13.4812	7.46575	5.03706	8.76581	14.8433	14.5108	13.8857	4.57229	4.44926	5.71046	11.3141	11.7196	11.2813	16.8765	12.2095	17.3677	10.2854	10.8063
5q33.2	NM_018691	10827	FAM114A2	family with sequence similarity 114, member A2	1.13098	0.177569	0.0178793	0.271995	5.68578	5.32088	6.31788	5.3192	7.77623	6.20363	8.68727	8.47813	8.89191	9.0398	12.859	8.94575	8.70818	7.44791	5.92529	9.29301	7.69101	8.68686	5.01499	4.2687	4.04958	8.27643	7.85179	8.5235	4.66409	4.41142	5.60662	7.72456	7.05142	6.81025	2.72704	3.57072	4.80637	7.33748	6.49432	5.68134	7.70515	7.6229	8.01392	7.10101	5.67761
2p11.2	NM_004836	9451	EIF2AK3	eukaryotic translation initiation factor 2-alpha kinase 3	1.20747	0.271984	0.0178872	0.271995	4.38425	3.98882	3.84625	3.8956	4.57159	4.33482	3.39346	3.5475	3.47616	5.33398	5.58096	4.89602	4.43976	4.29202	3.20774	5.00978	4.90426	5.56666	4.32946	4.23217	3.84571	2.93819	4.24815	3.62172	3.24005	2.31428	4.07867	4.19917	3.73644	3.35959	1.03852	1.12945	2.12335	3.58031	3.45999	3.4277	4.25619	3.77627	5.7624	2.52018	2.74476
12q24.31	NM_016399	51499	TRIAP1	TP53 regulated inhibitor of apoptosis 1	1.10801	0.14797	0.0179567	0.271995	11.5763	10.0865	15.37	15.5883	17.5094	16.6151	14.3666	14.6885	18.01	13.4903	15.7915	15.4817	21.5759	24.4381	23.892	10.4232	11.3987	11.9621	12.3648	11.5905	9.81626	8.99497	10.4445	11.652	9.34888	11.9046	12.4394	12.7971	10.1611	8.78786	5.97178	5.63908	11.2881	12.1985	13.0953	9.70725	14.1831	12.9002	12.4864	13.2144	11.2977
16q24.2	NM_015144	23174	ZCCHC14	zinc finger, CCHC domain containing 14	0.879417	-0.18538	0.0179752	0.271995	4.54755	4.39783	2.75121	6.14255	5.46239	6.08511	4.96763	4.27985	4.52457	3.37192	3.37543	3.324	3.99028	4.88457	4.38592	4.49821	5.04768	4.74162	7.1129	7.36479	7.33464	4.28445	4.65287	4.19089	6.81403	6.47772	6.31026	4.32007	4.23917	4.65669	3.95774	3.40025	5.44554	4.57868	5.13466	4.94853	5.01208	5.41819	5.76822	4.72793	5.64536
8p21.2	NM_001283054	81551	STMN4	stathmin-like 4	0.704471	-0.505388	0.0179875	0.271995	33.6748	31.9139	21.2749	20.8088	21.4696	22.3166	10.8056	8.68102	9.18646	1.19087	2.5642	2.80203	16.02	20.5361	21.0491	12.6882	24.3978	10.7606	56.474	51.874	49.7503	13.8262	11.8837	9.40018	23.9029	20.9801	23.9001	22.4499	19.7444	19.3013	6.94877	7.56125	7.88533	10.8344	16.9897	11.3193	10.8677	13.0031	17.9443	10.271	16.6863
8p22	NM_178234	7991	TUSC3	tumor suppressor candidate 3	0.808006	-0.307561	0.018017	0.271995	10.4008	5.61654	5.67256	11.0244	12.0828	12.2574	11.9782	15.2756	15.551	5.45222	7.66118	6.52934	4.14618	7.39124	4.83685	16.7916	11.8518	12.8074	15.0085	12.6468	13.3168	15.1459	15.9624	18.5915	12.3563	12.2255	13.7019	18.1214	15.5036	20.4455	11.4465	9.79359	27.7058	10.744	10.9213	9.19925	17.7966	17.0227	17.6252	19.4694	16.5607
20q13.12	NM_018837	55959	SULF2	sulfatase 2	1.12168	0.16566	0.0180185	0.271995	8.90934	9.15723	5.65067	19.8691	14.3408	19.7849	25.5895	22.2416	25.1372	7.79044	7.00072	7.76517	7.30019	11.0714	7.80504	7.46002	6.95061	9.69996	6.33112	8.57002	7.66147	11.452	10.4085	10.5638	6.54947	6.4318	7.42531	12.1983	9.10179	10.0722	6.711	6.34663	12.0468	11.8497	11.7126	9.70724	15.1991	14.0236	15.6176	16.5466	13.2412
7q11.21	NM_000181	2990	GUSB	glucuronidase, beta	1.17575	0.233577	0.018099	0.272798	4.092	3.54919	2.61574	5.61625	5.31515	5.38021	6.06456	5.89004	5.74351	6.71441	7.30706	8.83444	4.48877	5.21085	5.08141	4.7258	5.86864	5.72115	2.96114	2.36285	2.68397	5.66604	5.62381	5.96833	4.46198	4.48338	3.84923	5.78456	5.73515	6.02423	2.87459	3.46176	5.05865	5.76406	4.76941	3.81862	4.47305	2.98468	3.65825	2.94283	4.58258
2q11.1	NR_103734	150759	LINC00342	long intergenic non-protein coding RNA 342	0.793034	-0.334545	0.0181658	0.273391	1.52645	2.33123	0.625383	2.73704	1.85223	3.13555	2.27445	1.66796	2.0057	2.80689	1.81357	1.67848	2.0271	2.10761	1.82768	4.00991	2.42981	3.87863	3.23981	3.93647	4.15023	2.5747	3.12114	1.39887	9.34427	2.71288	3.61832	2.03929	2.36055	2.94939	3.723	2.76272	2.61455	2.11436	2.77834	3.10598	2.44645	2.36444	2.23449	2.42073	4.04822
19p13.11	NM_024881	79939	SLC35E1	solute carrier family 35, member E1	1.08926	0.123349	0.0182071	0.273599	11.9756	12.2634	9.31348	13.7101	13.4659	12.9007	11.8548	11.5698	13.6517	12.1854	13.7378	13.239	12.0133	15.4176	13.6267	11.4929	13.7916	10.7012	14.291	14.1443	15.0543	9.72656	9.07254	10.5292	9.19576	7.6544	8.82523	11.5351	10.7063	9.51642	8.83625	7.12191	9.41297	13.5534	14.8759	12.7544	11.0153	10.4502	8.91294	9.81331	9.46304
12q24.33	NM_005895	2802	GOLGA3	golgin A3	1.13325	0.180467	0.0183151	0.274809	10.3181	10.8618	6.40215	13.6257	13.627	14.9249	12.3112	12.3422	14.8677	16.7986	17.7049	15.0745	12.649	15.3611	13.2834	7.614	12.8515	9.38158	11.9068	12.4453	12.2661	8.91047	9.12869	8.77797	11.8767	7.71396	9.54985	14.0192	12.1994	11.5576	9.91279	8.30354	12.5302	13.9345	16.0077	14.9817	12.0251	9.5422	9.72814	8.41246	9.76949
22q11.23	NM_005940	4320	MMP11	matrix metallopeptidase 11 (stromelysin 3)	0.753983	-0.407395	0.0184177	0.275703	2.10748	1.84675	1.79877	2.41689	3.98562	2.70471	3.5404	4.21956	3.42332	2.89424	2.43018	3.15777	3.51174	3.86205	3.47441	4.28035	6.88169	5.013	1.17542	1.36095	1.56814	3.28731	2.70725	3.62485	2.72943	2.15956	1.87006	6.19969	6.5444	9.19712	6.84195	7.5687	3.55615	5.14227	4.30677	4.29442	6.16889	4.41409	3.05826	4.29103	2.97112
19p13.3	NM_033064	85300	ATCAY	ataxia, cerebellar, Cayman type	0.689005	-0.537414	0.0184675	0.275703	25.6494	29.5086	19.1267	23.2101	20.5997	22.1731	12.3691	8.71892	9.3054	1.05973	1.62703	1.83114	18.4651	20.4197	22.4999	10.5166	15.2132	6.36171	40.3166	40.7135	41.3215	9.13236	7.33797	7.88407	23.3852	21.6466	20.4462	12.043	13.4676	14.4907	14.8162	16.0419	9.85096	14.8047	18.6979	17.1832	11.4133	17.4858	15.4537	11.9577	16.2092
4q32.1	NM_001130687	2982	GUCY1A3	guanylate cyclase 1, soluble, alpha 3	1.51701	0.601233	0.0184733	0.275703	6.3869	4.85784	5.01121	2.19031	3.9698	4.88121	3.45983	3.47532	4.68162	13.3428	16.5468	12.7553	8.31466	9.19108	7.16273	9.63157	2.86858	6.57413	2.51554	2.03159	1.63926	3.89085	4.41491	3.90516	2.51371	0.928445	3.58012	9.09198	7.71857	7.85031	0.575643	0.664662	2.25574	4.86225	4.7251	4.13492	6.49781	4.4706	6.13937	2.56185	1.13033
10p11.22-p11.21	NM_001184792	56288	PARD3	par-3 family cell polarity regulator	1.27274	0.347937	0.0185007	0.275703	4.27049	5.41117	6.26694	4.64009	4.81319	4.59812	5.3283	3.87916	2.60236	4.5098	5.68361	4.49383	4.80113	4.31488	2.72365	6.72082	3.98227	5.60803	4.16439	4.08367	4.29858	2.3017	3.41727	1.85074	4.04149	1.8744	2.89454	3.36072	5.33002	4.27775	1.11878	0.315764	2.34743	3.41102	2.94595	3.84861	4.31146	5.49672	4.9871	2.77307	4.83769
1p36.11	NM_020448	57185	NIPAL3	NIPA-like domain containing 3	1.22245	0.289774	0.0185128	0.275703	4.01599	3.43736	1.99837	4.25122	4.26647	4.8407	4.75954	4.38249	5.35623	9.21649	9.56194	9.37215	3.02716	4.45306	3.69686	4.45505	2.80108	3.7752	3.68105	3.92392	4.0152	7.0924	6.28859	7.44202	4.08163	2.74028	3.25346	5.62939	4.68147	4.05912	1.90732	1.81835	4.20603	4.42069	4.43281	4.01039	4.75672	3.6595	4.26111	3.70791	4.08584
7q34	NM_032982	835	CASP2	caspase 2, apoptosis-related cysteine peptidase	1.21439	0.280226	0.0186467	0.27667	2.3012	2.64668	2.07945	3.68986	3.20259	3.8772	4.52994	3.33265	3.33836	3.63609	3.93217	4.14314	2.09792	3.3903	1.9811	4.04619	3.00593	4.39329	1.37508	1.23982	1.96519	3.47592	3.1569	4.14872	2.19706	2.21077	1.79233	3.21283	4.34143	4.24597	2.46227	2.85412	2.33828	3.41637	2.33044	2.48749	3.59525	3.52515	3.54823	2.00176	2.26027
Xp11.22	NM_018969	54328	GPR173	G protein-coupled receptor 173	0.772434	-0.372516	0.0187421	0.27667	12.0066	12.1616	12.4558	11.218	9.40002	8.52243	6.59774	5.29807	6.25744	1.95048	2.01347	2.12571	7.72066	6.66621	8.58892	6.52124	8.83159	6.35417	11.8381	11.5002	13.2096	7.25692	6.87067	6.7916	8.94979	9.69881	9.76599	5.24563	6.84205	8.36234	10.1733	9.82591	4.73763	8.98702	9.51611	9.7405	7.9816	9.0239	9.6526	7.56969	10.2358
3q22.1	NM_016577	51560	RAB6B	RAB6B, member RAS oncogene family	0.775567	-0.366676	0.0187464	0.27667	14.2153	14.347	8.40665	13.9523	12.6856	13.8905	9.34615	7.03836	8.16237	2.5195	3.12535	3.05927	9.26616	10.1778	11.8251	6.10837	9.63998	5.91815	23.3606	25.9063	29.0116	10.7645	9.04538	9.90397	15.8141	14.6459	15.3531	7.4514	8.15676	9.36449	11.4335	10.2288	9.80101	10.5194	11.2746	10.0747	9.4364	13.0637	11.5342	10.2369	14.5524
17p13.2	NM_015099	23125	CAMTA2	calmodulin binding transcription activator 2	0.819957	-0.28638	0.01879	0.27667	2.82765	2.09453	1.1079	2.35271	2.14672	1.46656	1.28543	0.873624	1.40532	1.71887	1.76103	2.43458	1.63961	1.84366	2.24456	0.956017	1.18442	1.23783	2.90102	3.39307	3.28387	3.12989	1.418	2.3	3.63973	1.62388	2.26084	1.79338	1.72173	2.53928	4.3385	3.30314	1.98951	2.5366	2.60192	3.32337	2.48666	1.9173	2.33054	1.66567	2.27262
12p11.22	NM_021821	60488	MRPS35	mitochondrial ribosomal protein S35	1.07301	0.101659	0.0188035	0.27667	19.6807	14.4802	18.7279	16.0219	19.685	15.8199	19.6853	19.8002	17.4903	19.9077	25.2577	18.8762	21.8859	18.722	15.8654	22.7655	17.9067	17.1745	17.8797	13.8438	14.8841	14.7579	15.7612	16.005	11.6974	11.9681	14.9941	14.6991	12.4984	12.4333	9.835	9.55756	16.7254	15.5964	18.7855	14.2646	18.8477	16.5524	18.8551	19.3651	15.069
15q21.2	NM_013243	29106	SCG3	secretogranin III	0.683618	-0.548737	0.0188318	0.27667	13.5233	11.256	11.3888	9.77579	9.81999	9.66023	4.70503	4.30121	3.60955	0.518683	1.26739	0.598832	8.92711	8.70513	9.51624	6.43787	9.65389	6.5857	22.0248	21.8661	25.0697	7.50006	6.9759	6.48643	7.3434	9.97077	9.18323	5.35026	6.7367	8.38074	3.37591	3.35156	2.33046	5.49751	6.52639	5.1764	6.49608	8.81596	9.99951	5.47017	7.51316
2q37.1	NM_004846	9470	EIF4E2	eukaryotic translation initiation factor 4E family member 2	1.11766	0.160487	0.0188732	0.27667	14.036	12.4932	16.9439	17.0715	19.5007	21.1762	20.5813	23.9058	22.5103	29.2201	30.9896	29.3309	21.0073	23.8436	21.472	22.6838	22.0759	18.2386	9.27222	9.27038	6.28181	21.0209	19.2312	19.7166	12.3357	14.2056	10.5575	20.7455	20.287	20.3629	12.9343	15.5247	15.4249	22.6455	22.2162	19.1914	23.9879	18.0175	16.9854	15.0971	13.2345
15q21.2	NM_014548	29767	TMOD2	tropomodulin 2 (neuronal)	0.729139	-0.455735	0.0188864	0.27667	11.3545	9.52885	6.83873	5.90479	5.98989	5.57903	3.32611	2.83287	2.39407	1.95721	2.25908	1.87088	10.7715	10.9798	10.4464	4.37149	6.10375	5.47629	21.2287	23.5302	22.8694	5.53812	5.75126	4.60325	6.49771	4.75543	8.0959	6.20176	4.66051	6.03768	2.50158	2.14524	3.91243	4.4639	6.02067	4.74263	3.8299	4.69313	5.32498	4.11944	5.4588
12q24.3	NM_021009	7316	UBC	ubiquitin C	0.977325	-0.0330892	0.0188869	0.27667	517.136	560.147	649.274	479.39	472.49	431.128	347.395	371.002	326.559	315.368	368.486	326.434	420.569	455.668	469.05	359.262	394.02	353.187	511.172	487.499	540.632	365.748	295.814	372.054	412.843	566.638	408.56	373.319	401.609	460.34	470.718	497.195	280.812	356.054	463.994	445.916	431.748	509.797	379.562	432.502	460.198
7q11.23	NM_001081755	2006	ELN	elastin	0.71903	-0.475876	0.0189039	0.27667	0.637981	2.37032	0.530223	1.22823	1.108	0.882242	1.16749	1.61826	9.6e-05	0.415198	0.823837	1.30272	0.788131	0.946025	1.08207	1.32869	1.74175	2.05282	0.281989	0.374969	0.606623	1.37577	0.112081	1.66679	1.62209	2.4522	2.2515	2.0557	2.49791	3.99706	1.04134	1.20311	1.15382	2.33379	1.62229	2.36573	2.25816	3.01554	1.21828	2.13154	2.50462
9q34.13	NM_001077365	10585	POMT1	protein-O-mannosyltransferase 1	0.808784	-0.306173	0.0189289	0.27667	3.37441	3.68197	3.10841	3.45058	4.24897	2.89946	3.76539	4.96037	4.46267	4.89131	4.85844	5.63704	6.13359	5.60414	2.00974	6.99838	3.10001	4.72	4.01333	6.16882	4.22867	6.65424	5.85114	6.66671	5.00773	1.56676	3.09187	5.55352	3.46027	5.43124	10.9086	7.5126	5.3798	5.28387	5.29939	6.13105	5.84349	5.01167	6.22112	8.63832	7.83754
1p34.1	NM_001202413	10327	AKR1A1	aldo-keto reductase family 1, member A1 (aldehyde reductase)	1.09643	0.132814	0.0189295	0.27667	26.937	25.3273	29.5978	28.4966	38.9174	27.8657	27.3771	25.678	29.3078	32.9691	29.0187	33.6254	38.0733	29.6209	32.7529	11.759	30.6375	23.91	17.2235	13.6189	15.0214	23.3143	16.9033	19.3963	15.5697	29.8243	19.1783	21.3769	27.406	33.6894	23.982	27.0342	15.8912	27.804	25.2212	23.5476	24.9712	28.8158	15.0999	22.1158	26.0187
2p11.2	NR_024206	112597	LINC00152	long intergenic non-protein coding RNA 152	1.51739	0.601593	0.0189382	0.27667	6.8068	5.27531	11.3539	4.05711	8.07945	7.18473	6.22935	7.20238	6.92644	14.8492	14.575	15.3459	17.7272	19.999	11.6251	6.97296	8.13341	4.89188	2.02156	1.94215	2.14154	7.88195	5.70751	8.75582	5.72233	7.6852	5.19523	6.96489	9.24338	7.16382	5.39328	5.93451	3.16542	5.8445	7.38919	8.07179	6.19481	2.69345	2.26283	1.39236	2.37569
10q22.1	NM_004896	9559	VPS26A	vacuolar protein sorting 26 homolog A (S. pombe)	1.07717	0.107251	0.0190625	0.277451	9.01024	6.10943	6.70575	8.97028	10.7523	10.6868	10.8359	9.48935	9.05242	10.3968	13.4184	10.1624	10.8167	9.62074	8.20688	9.54142	9.64952	10.163	7.12442	7.65068	6.92802	7.93578	9.82292	10.6456	5.79044	7.58432	7.73241	8.31158	7.94398	8.64274	5.3215	4.2019	5.90544	9.7159	9.86322	8.41553	9.9396	11.2844	11.4919	7.15854	6.52585
6p22.3	NM_001546	3400	ID4	inhibitor of DNA binding 4, dominant negative helix-loop-helix protein	0.815614	-0.294041	0.0190682	0.277451	36.566	26.7403	29.5328	42.3097	31.9786	43.8679	29.1895	23.8928	26.4225	6.56493	9.45175	10.7866	52.0303	48.4994	51.7802	28.7938	44.1152	24.4919	37.1343	36.3512	33.2273	10.3492	11.5757	11.7285	42.2798	50.8742	50.2977	39.7443	38.4068	40.3582	24.1133	18.8112	29.0599	31.4917	35.9407	32.9194	21.6307	27.1519	35.2629	33.2959	28.1023
17q21.33	NM_005827	10237	SLC35B1	solute carrier family 35, member B1	1.11359	0.155221	0.0190751	0.277451	6.64346	7.60573	7.9176	13.6631	11.0919	11.9345	13.3501	13.7585	12.5999	10.3225	10.7498	9.98303	11.6805	14.0079	9.84735	10.0724	11.1879	9.08974	8.54495	10.052	8.30785	7.20353	4.82945	5.96457	7.72384	9.91452	7.17865	10.2333	7.24954	11.3933	7.6165	6.6224	6.77593	9.01754	9.47492	7.91499	12.6967	8.95743	10.766	9.73552	5.1844
17q12	NM_012138	26574	AATF	apoptosis antagonizing transcription factor	1.17981	0.238558	0.0192102	0.27901	10.586	8.63039	8.60128	7.92802	8.16842	6.83108	11.0629	10.1424	9.17639	10.5945	10.4887	9.21579	8.71501	11.3896	8.46004	9.41066	7.50017	11.9098	10.4774	10.2598	11.9399	10.0065	7.93613	9.26261	4.50289	3.57649	5.8905	7.73894	5.34675	7.30969	2.18684	2.66371	3.60913	7.46506	7.49708	7.16687	9.68084	6.064	8.63686	8.0145	6.94357
19q13.32	NM_020709	57469	PNMAL2	paraneoplastic Ma antigen family-like 2	0.783806	-0.351431	0.0192588	0.279309	2.46302	3.15952	2.4422	2.214	2.15214	1.82398	2.04293	1.88649	2.19219	0.774219	0.564916	0.913696	1.79564	1.64077	2.12695	0.715995	1.82964	1.54492	6.08993	5.75371	7.20017	2.0279	1.9032	1.74356	2.61604	2.41309	2.57214	2.56324	2.52308	3.2927	3.85645	3.67293	2.10301	2.39902	3.14737	2.9851	1.92694	2.20438	1.7773	2.43505	2.45685
17q25.3	NM_004514	3607	FOXK2	forkhead box K2	0.913439	-0.13062	0.0193252	0.279865	18.7231	18.7581	17.9564	15.6411	14.0497	14.8165	11.8188	11.5137	11.4224	10.1024	10.2903	10.4701	15.7524	18.2309	18.1094	14.3179	15.2847	11.2217	16.275	18.0531	19.3046	17.5907	14.2097	16.8765	12.1047	13.3492	12.9145	11.9691	13.4429	14.1459	14.7583	14.0758	10.992	15.8336	16.7382	16.3227	14.7161	13.7021	13.5091	12.7612	13.8744
5q12.1	NM_016338	51194	IPO11	importin 11	1.12026	0.163834	0.0194248	0.280188	6.92692	4.68417	6.29102	4.54756	5.78919	4.80801	6.31914	6.39963	6.11643	6.75827	7.56147	6.36172	6.00284	5.9361	4.99514	6.82679	7.93374	8.31004	4.69717	4.62657	4.4649	4.47424	5.495	5.63379	2.89967	3.32207	4.54642	5.84806	5.40247	5.22859	2.1475	2.60873	5.08418	4.90059	5.30597	4.8076	5.99651	5.68909	7.0404	5.34011	4.72567
8q12.1	NM_017813	54928	IMPAD1	inositol monophosphatase domain containing 1	1.13179	0.178613	0.0194254	0.280188	10.7434	7.31005	7.73597	13.1931	14.1389	15.8237	12.7112	12.9329	13.7918	20.3459	20.5547	19.6632	13.4774	17.7744	14.3573	11.0996	16.2432	13.8402	11.8152	11.0456	9.07628	9.02189	10.0312	9.98427	10.227	12.9078	12.267	13.3931	10.1111	10.0303	4.54058	3.85442	13.0723	12.4231	12.0993	10.4756	14.152	12.069	14.8827	8.55313	7.31202
Xq12	NM_021783	60401	EDA2R	ectodysplasin A2 receptor	1.42489	0.510856	0.0194318	0.280188	3.2467	2.34221	1.9896	1.36217	2.40575	2.37479	4.09496	3.27468	5.00246	2.56132	1.92867	2.29351	2.4416	1.97678	1.84835	0.71741	0.182135	0.239123	1.36203	1.74469	1.37288	0	0.016684	0.087817	1.88028	2.08916	2.35827	2.72057	2.26403	0.956278	1.56148	0.44072	3.07846	0.878334	2.79909	1.83289	1.76502	2.09816	2.45226	3.19203	2.99682
17p11.2	NM_003653	8533	COPS3	COP9 signalosome subunit 3	1.11757	0.160369	0.0194909	0.280635	25.6229	20.382	25.1071	23.2608	28.2493	24.1118	22.7644	23.2725	21.1984	23.9543	28.3238	22.2515	33.9196	32.6468	26.5114	25.3509	29.1749	25.9112	28.4208	22.9376	21.2523	15.8599	16.9417	15.7265	12.3459	12.9526	15.32	23.2739	19.939	21.2831	6.05098	7.22856	13.0824	18.5417	17.7595	15.7882	20.9333	21.1964	24.9259	16.2718	13.7958
3q22.3	NM_006153	4690	NCK1	NCK adaptor protein 1	1.20445	0.268377	0.0195543	0.281142	3.87006	2.75191	3.38847	3.88112	3.62088	3.03466	4.0924	3.89236	4.24091	4.61202	5.72365	4.47047	3.93098	3.4225	2.38671	4.92919	4.84769	4.43438	2.89046	2.9164	3.37062	3.66291	3.87176	3.12415	2.53583	1.91195	3.95301	4.81221	3.78756	3.78912	1.47186	1.32175	0.949826	3.18215	4.05903	4.10537	3.46418	3.36251	5.24806	3.4227	2.80459
19p13.12	NM_014371	26993	AKAP8L	A kinase (PRKA) anchor protein 8-like	0.904782	-0.144358	0.0196644	0.281694	23.5703	24.4039	12.9615	16.6074	13.6409	17.1989	14.6949	12.5913	16.3353	12.9006	11.1864	15.6442	11.2461	16.3612	17.7098	13.9976	18.9452	15.479	16.9163	19.1864	18.6705	23.9646	23.6523	24.9739	20.538	14.1297	18.0351	19.8527	14.4811	15.7697	15.5453	15.314	18.5572	18.1097	20.7089	18.4668	17.6063	15.3688	15.6884	20.9932	22.7793
17q25.3	NM_005052	5881	RAC3	ras-related C3 botulinum toxin substrate 3 (rho family, small GTP binding protein Rac3)	0.859846	-0.21785	0.0196941	0.281694	40.3645	39.0872	56.7172	32.5122	33.6817	31.875	18.0072	18.0395	17.6354	12.4127	11.8635	14.779	38.6718	37.4686	36.6858	22.0467	32.0993	18.6726	55.3046	52.4652	47.0474	21.1241	15.0055	17.8653	34.8053	48.5391	36.249	26.6413	27.9213	37.6834	36.6024	40.9857	13.6081	24.5563	27.5022	27.7444	27.3642	35.1247	23.467	24.8515	25.9608
Xp11.23	NM_004182	8409	UXT	ubiquitously-expressed, prefoldin-like chaperone	1.03812	0.0539687	0.0197017	0.281694	47.1416	45.617	56.9344	57.8709	60.186	55.6944	55.7252	61.0882	59.3796	53.0895	64.6855	59.9775	66.7573	56.9032	61.0698	49.3402	60.2903	47.6747	31.8437	30.0337	27.5956	51.2719	46.0828	49.5428	38.2215	42.4424	35.9011	51.975	55.3213	58.1071	47.5907	54.1666	31.2469	49.993	55.1769	51.0095	56.2668	51.5437	49.9409	40.5364	39.1899
7q11.23	NM_017528	114049	WBSCR22	Williams Beuren syndrome chromosome region 22	1.10869	0.148856	0.0197866	0.281694	14.7702	10.5217	11.7584	22.0262	22.7622	19.9809	22.1075	22.7026	23.96	16.3627	17.5341	21.5546	22.2755	26.4489	20.8799	16.1423	24.6639	11.528	14.4423	15.1643	12.1991	8.36435	10.4789	12.0503	13.6529	14.1552	11.5148	15.5423	18.6638	17.5772	17.8228	15.6456	10.1351	19.421	18.7271	12.8924	19.6684	15.3546	12.3351	14.6571	12.0021
1p32.1	NM_018291	55277	FGGY	FGGY carbohydrate kinase domain containing	1.11609	0.158457	0.0198102	0.281694	5.31701	5.37752	6.13811	5.03142	5.97733	4.91528	4.70082	7.19536	6.52254	5.07062	6.33696	4.88338	3.46247	5.28463	4.95165	5.91269	6.63758	4.0257	5.01537	3.8457	4.42931	5.36478	4.97716	5.56412	5.20079	6.75348	5.60191	4.06792	3.89179	4.51166	2.21537	3.03562	3.76536	4.6415	5.4851	4.9306	5.60035	4.77025	5.58047	4.82558	4.59453
6q22.31	NM_001270393	5570	PKIB	protein kinase (cAMP-dependent, catalytic) inhibitor beta	1.64215	0.715583	0.0198217	0.281694	11.9815	7.21284	10.5216	1.78617	2.07112	1.70252	7.8398	6.58422	6.52675	4.41484	1.35952	3.83927	3.94516	4.56807	4.79468	9.27799	7.02217	6.51971	0.272455	0.108669	0.288391	1.7276	1.14947	2.38862	0.727944	1.51739	1.3806	2.70884	2.71652	2.64316	2.13119	1.40512	4.46122	2.83649	2.51672	1.9507	6.3336	9.42015	12.7696	2.3586	1.65093
2q33.3	NM_003709	8609	KLF7	Kruppel-like factor 7 (ubiquitous)	0.750099	-0.414847	0.0198314	0.281694	5.1379	5.43398	2.62811	3.72594	3.34097	3.99574	2.61383	1.91264	2.17712	0.458681	0.68026	0.512811	2.67153	2.99067	2.93652	3.12602	4.35843	3.32913	9.06636	9.44987	9.04804	3.56678	3.3808	2.6427	5.01166	3.61296	5.95183	3.35404	3.16685	3.59501	1.90924	1.66851	2.90304	2.82682	3.55957	3.13315	2.45726	3.66549	3.78109	2.39134	2.98155
17p13.1	NM_001204510	1973	EIF4A1	eukaryotic translation initiation factor 4A1	1.30138	0.380038	0.0198921	0.281694	4.63895	3.29473	10.7974	5.24276	6.18634	7.23843	4.98523	6.32772	4.56515	5.33171	3.78064	6.9255	7.04397	7.26962	7.24591	4.45119	9.30713	7.30301	3.00531	3.78703	2.9513	3.18705	3.50653	2.77754	4.67495	2.97243	4.19589	5.43918	4.34107	2.61784	2.57966	2.64497	4.10618	3.57756	3.75009	3.35475	5.04682	4.08639	8.15214	0.734482	2.14031
7q22.1	NM_016188	51412	ACTL6B	actin-like 6B	0.675627	-0.5657	0.019911	0.281694	13.6747	14.4745	11.4172	15.8432	14.1498	16.0198	7.44884	6.34181	6.69582	0.61978	1.43861	0.862295	11.8368	12.1436	13.624	7.20384	11.7086	3.9187	29.0438	27.3837	27.8699	5.39238	4.02094	5.01276	16.0946	19.9796	14.4503	9.52027	10.0856	12.673	13.3562	13.8489	5.26337	7.81399	9.71439	8.84275	8.10681	15.6153	7.8898	9.61189	12.3935
7q11.23	NM_181471	5982	RFC2	replication factor C (activator 1) 2, 40kDa	1.17399	0.231418	0.0199223	0.281694	7.18418	5.05895	6.71332	9.61703	7.06333	8.79242	5.95989	8.73419	8.92433	8.60965	9.50838	8.95042	6.64209	11.003	8.04692	10.7264	11.3021	9.74031	6.23211	7.99932	5.92999	5.21754	5.24029	5.9239	6.52342	5.93395	4.39156	7.6475	7.90733	5.95813	2.99274	3.49552	4.80555	5.6797	6.32733	4.82503	8.22476	6.0906	5.96053	3.43283	2.65892
3p22.3	NM_001207044	23122	CLASP2	cytoplasmic linker associated protein 2	0.793111	-0.334404	0.0199257	0.281694	16.619	13.2223	10.8425	10.8458	11.8791	13.0909	9.25876	6.12373	7.82016	2.94693	3.90085	3.95309	8.38956	8.62861	9.38498	9.11647	11.347	10.152	30.5826	29.8105	29.2189	10.0005	9.87538	9.57842	14.2631	14.3209	16.2799	9.46519	8.99946	10.3701	6.26356	5.94631	10.2231	8.54596	9.59225	8.56367	8.65789	11.6818	14.8273	8.11036	10.0278
1p32.3	NM_052940	115353	LRRC42	leucine rich repeat containing 42	1.13943	0.188308	0.0199608	0.281694	7.5751	6.45242	7.8723	7.59349	8.43214	7.66104	8.81104	7.26101	9.48611	12.2328	13.9435	12.0514	5.45511	6.7187	4.75575	9.71903	11.2405	7.49704	5.19206	5.07252	5.40336	9.71497	8.41432	12.3631	7.15163	6.30746	8.6664	7.45416	5.9858	6.27494	3.41391	5.4003	5.46249	9.57369	9.99529	6.956	9.6727	9.1696	11.6373	7.32659	5.6226
3q21.3	NM_032242	5361	PLXNA1	plexin A1	0.863639	-0.2115	0.0199611	0.281694	15.356	16.9512	13.4338	19.3289	16.1696	17.5301	12.8205	12.1814	12.4592	9.00523	8.14645	8.84853	13.0317	13.5673	15.105	9.20121	12.5773	8.7782	18.1445	18.1487	22.1372	13.5715	11.0924	13.1195	17.9291	16.8069	14.5817	14.9283	19.657	23.3157	21.9554	22.6615	11.8734	14.8922	15.6266	17.0127	16.1163	17.3865	12.0041	13.7018	17.4601
5q31.3	NM_032420	5097	PCDH1	protocadherin 1	0.747893	-0.419096	0.0200602	0.281694	3.14836	5.53463	3.23329	4.42896	4.03985	3.76068	1.82812	1.98391	0.718783	0.867277	0.816999	0.804088	3.12305	3.89282	4.63356	3.63335	3.12769	2.87564	4.18484	4.49045	4.87492	2.1848	1.8826	1.91196	5.38086	3.51145	3.55435	2.44289	2.74683	4.21251	6.34469	6.8807	3.74164	2.93112	3.225	3.89248	2.90842	3.33278	1.92215	2.04628	3.25483
1p32.3	NM_001159969	2060	EPS15	epidermal growth factor receptor pathway substrate 15	0.715747	-0.482478	0.0200877	0.281694	13.9143	10.9633	10.5777	6.3357	6.57767	6.59917	4.74234	3.66557	3.75892	0.70378	1.99691	1.23678	9.18854	8.00454	8.2793	6.13482	8.40158	4.67967	21.9146	19.8066	20.3825	4.16615	4.11307	3.27926	6.83628	8.39167	10.8865	8.13196	7.14816	7.74461	3.65167	2.96199	4.75937	4.50075	6.08699	6.04264	5.70662	6.73853	7.45102	5.78481	6.44937
6q13-q14.1	NM_004370	1303	COL12A1	collagen, type XII, alpha 1	1.40557	0.491155	0.0201302	0.281694	1.66819	2.34318	1.85957	3.72971	5.55945	5.99454	1.41393	3.20487	2.00387	8.15017	7.08784	4.77837	2.03603	2.53301	1.32176	2.41602	2.53367	2.89647	1.08752	1.09141	1.17125	1.21453	1.03018	0.526576	4.54663	1.76409	4.00165	3.26844	4.58964	3.19025	1.07163	1.44892	2.81877	4.66108	2.38253	3.66451	7.84289	3.31769	5.48064	1.30344	1.3109
5q35.2	NM_014613	23197	FAF2	Fas associated factor family member 2	1.10705	0.14672	0.020142	0.281694	8.84972	8.46289	7.35875	12.1385	12.4791	13.5764	12.9833	12.5974	12.2928	18.2176	18.9601	17.1451	12.15	15.2705	11.6794	13.6011	14.1249	13.9884	9.21181	9.71237	9.43931	11.3191	11.654	12.2429	7.47614	6.2836	8.79703	13.9899	12.3571	11.7047	4.53716	4.39705	11.3255	11.0121	11.4055	10.2789	13.4319	11.4323	13.5296	9.92461	8.7287
4p15.2	NM_024936	29063	ZCCHC4	zinc finger, CCHC domain containing 4	1.13894	0.187693	0.0201501	0.281694	3.24119	2.5944	2.97151	2.62234	2.72145	2.24403	2.75704	2.79255	2.88025	3.9444	4.17853	3.0822	3.078	2.93796	2.52824	3.32618	3.38126	3.08264	2.43465	2.45259	2.275	2.85442	2.69973	2.73388	2.66229	2.2397	3.04829	2.81472	2.37286	2.32744	1.26952	1.3878	2.14916	2.32157	2.90559	2.6563	3.10893	2.87847	2.88775	2.88378	2.40677
11q13.2	NM_020470	10897	YIF1A	Yip1 interacting factor homolog A (S. cerevisiae)	1.08149	0.113026	0.0201606	0.281694	28.8296	31.3427	43.5039	42.1601	47.6962	39.2713	59.1637	65.9624	74.3296	49.2207	50.2955	61.7254	38.7239	46.8761	42.052	34.3313	53.7037	48.8459	21.4585	18.8311	21.281	33.3211	27.3284	30.6534	24.6411	29.9591	25.5149	40.8476	49.0893	55.4634	41.8713	42.0348	20.3623	57.7991	60.4686	57.9283	54.0234	48.2686	36.4888	33.3745	31.5725
Xq28	NM_001493	2664	GDI1	GDP dissociation inhibitor 1	0.914417	-0.129076	0.0201749	0.281694	86.9942	98.3325	48.2043	83.9812	71.6093	86.5287	56.4962	51.6557	61.2141	31.2999	30.839	36.1444	53.439	67.9109	76.7279	52.2615	78.5991	43.6766	120.376	122.18	122.818	68.7938	59.0202	60.9414	95.4122	80.5605	85.9615	67.2524	60.3099	62.1705	60.6911	67.4587	56.9966	60.633	71.6761	58.0308	53.273	55.7371	55.5559	70.3605	83.2514
12q24.31	NM_016237	51433	ANAPC5	anaphase promoting complex subunit 5	1.07612	0.105835	0.020201	0.281694	16.4189	15.1626	16.9148	22.7645	21.6964	21.4085	23.2169	23.6023	24.1091	22.6685	22.7096	25.0604	21.2442	24.1575	21.9835	16.9092	21.2497	23.204	19.8575	21.6292	19.457	17.6013	14.8287	16.2575	19.2145	17.0143	15.5003	21.5949	20.7168	19.3395	8.58061	11.5413	13.9355	20.4013	22.2014	18.0275	22.5793	22.3525	18.9119	15.8151	13.0291
5q31.3	NM_030799	81555	YIPF5	Yip1 domain family, member 5	1.12497	0.169888	0.0202137	0.281694	13.9212	10.591	13.0613	19.0693	24.9626	21.7997	21.6467	24.8032	23.0456	35.9169	42.5151	37.1808	27.0235	28.5621	22.6565	27.903	22.0924	22.8359	14.3738	13.5729	12.3223	16.6072	19.1864	20.4926	9.17756	11.0435	14.1165	28.2635	23.7096	22.1711	7.96603	6.82133	18.2245	22.0847	20.3478	17.3925	22.5214	18.8691	23.1586	15.4197	12.701
12q13.12	NM_001008223	338761	C1QL4	complement component 1, q subcomponent-like 4	0.724459	-0.465024	0.0202698	0.282081	0.454265	0.58677	0.937657	1.73559	3.33833	2.67533	1.01327	0.930544	1.04853	2.84861	3.26427	3.26632	1.51042	1.48395	1.33306	4.06361	0.869905	0.993614	3.071	3.00226	4.15595	1.3778	0.752429	1.24198	4.01355	3.94734	3.23192	1.37355	2.45776	2.81012	8.47605	6.9431	2.43451	3.63336	3.18576	2.48441	3.12438	4.24051	2.30937	1.34188	0.860956
3p21.31	NR_045388	100775107	RBM5-AS1	RBM5 antisense RNA 1	0.736194	-0.441842	0.0203257	0.28228	4.99141	5.19753	2.18327	2.06995	0.770719	2.05402	1.48045	1.40034	1.73562	1.86578	1.93901	1.68716	0.842268	0.813535	1.03673	4.00724	2.00335	5.31414	3.64558	5.3859	3.98105	5.12911	4.66416	3.54119	5.47946	1.82809	6.50092	3.89352	2.82094	2.85407	2.35539	2.35944	4.73022	2.85593	3.08611	3.60615	1.88897	2.06045	3.98348	2.52208	4.06651
13q14.11	NM_020751	57511	COG6	component of oligomeric golgi complex 6	1.10392	0.142633	0.0203407	0.28228	9.84721	7.98756	9.29247	8.54444	11.0976	8.89773	12.682	12.4717	13.0554	12.1508	13.7362	10.7887	7.66369	6.90052	5.40209	11.8621	13.5058	15.4149	8.62865	6.3327	5.91854	8.11958	9.91652	10.8913	5.90785	6.53507	8.90317	13.1725	10.1698	9.92253	4.75143	3.85612	7.8332	11.8126	12.8439	11.178	11.803	10.8943	13.327	10.7259	8.55875
4p14	NM_018290	55276	PGM2	phosphoglucomutase 2	1.15268	0.204995	0.0203712	0.282311	3.18934	2.2872	2.81427	4.54731	5.05125	5.10161	5.26011	5.69431	5.15286	6.75652	7.96368	6.70259	3.9557	4.16661	2.86501	5.8217	3.86272	4.95207	4.05104	3.70044	3.37087	4.57644	4.8724	4.85199	2.729	3.00992	3.79242	4.41338	3.7037	4.09654	2.11133	1.69219	5.31413	4.12272	4.44185	3.70858	5.1117	4.72756	6.03851	5.1606	3.16124
20q11.22	NM_014183	83658	DYNLRB1	dynein, light chain, roadblock-type 1	0.972128	-0.0407816	0.0204288	0.282716	86.4373	82.063	92.4787	86.4795	93.3221	88.8887	89.3539	90.0616	85.1234	62.9715	68.1033	68.4023	85.773	90.2285	87.8893	82.745	91.9817	81.9813	101.446	100.592	94.6787	86.628	73.9074	84.3171	64.9906	92.744	66.7059	79.9727	79.3618	77.1664	98.9745	97.2546	61.2382	79.4379	91.5948	70.9349	87.6632	74.8656	67.5443	83.3377	76.4403
16q22.1	NM_058219	118460	EXOSC6	exosome component 6	1.10432	0.143153	0.0205105	0.283455	7.5402	8.32257	6.82262	10.9629	11.3687	11.1441	11.35	11.4699	12.2719	9.5508	10.2774	9.31383	11.9756	12.5783	11.4106	9.56329	11.4637	6.60335	8.33612	7.42955	9.41995	8.57725	6.19964	7.16054	8.76296	6.65639	5.60339	8.75916	9.73549	10.6184	7.96988	7.07912	5.73114	8.9926	8.9197	7.62451	7.60269	8.57143	6.61777	8.18772	7.04493
5q35.3	NR_003615	728554	LOC728554	THO complex 3 pseudogene	1.17445	0.231983	0.0206115	0.284456	15.8786	13.4077	14.9289	10.636	12.655	11.3791	13.347	12.4506	12.7569	11.2944	11.6776	11.6279	12.8856	16.1526	14.8187	18.7614	21.8792	20.376	13.0111	13.6641	11.4997	9.40673	8.33607	7.65834	5.6982	6.06309	5.80301	9.1095	7.60988	9.64342	4.96106	5.27462	11.9023	6.57324	7.22985	5.93824	8.84138	7.16158	8.75998	9.93192	9.97279
11q13.5	NM_015516	25987	TSKU	tsukushi, small leucine rich proteoglycan	1.22652	0.294576	0.0206621	0.284761	7.63969	7.78845	3.26502	10.8079	14.329	14.6945	14.3588	15.9733	15.2774	8.71612	10.444	10.3536	11.5145	8.3039	7.23605	7.13539	5.62564	11.258	3.91611	2.08531	5.62714	7.99404	6.13667	13.1747	4.11143	7.56833	2.78905	8.34404	12.6308	15.0233	7.50422	8.05088	3.05528	11.3358	13.127	14.2472	10.6043	8.30638	7.1445	7.96279	8.45633
8p21.2	NM_001386	1808	DPYSL2	dihydropyrimidinase-like 2	0.88535	-0.17568	0.0207387	0.285422	85.5176	71.8986	44.3726	78.7209	70.2305	79.8992	55.1883	40.6428	47.9095	17.3849	25.5669	22.0504	60.4976	80.1886	81.5964	73.4021	78.7472	45.3416	121.332	128.351	112.206	54.5065	47.0803	53.6575	63.0521	76.2217	72.3678	53.238	46.2395	54.3627	28.9225	29.7065	48.2865	48.2448	54.957	49.7936	49.0627	59.9065	70.3285	51.6044	49.5349
18q11.2	NM_018439	55364	IMPACT	impact RWD domain protein	1.1372	0.185489	0.0207953	0.285807	4.90456	3.54808	4.10877	7.20619	7.88959	7.27961	9.42751	8.66855	8.20678	8.96143	11.4614	9.12375	7.05544	6.29219	4.42509	7.50673	7.54678	9.51922	5.99125	5.91514	6.09535	4.60559	5.92183	5.03129	5.82859	4.5801	6.76641	9.8272	7.29364	7.28879	3.63069	3.2673	4.04473	6.83145	7.30288	5.55565	8.89208	7.83599	8.66271	5.70623	4.39409
11q24.2	NM_152713	3703	STT3A	STT3A, subunit of the oligosaccharyltransferase complex (catalytic)	1.12097	0.164744	0.020842	0.286054	21.7381	19.1114	23.7286	17.8317	21.5428	20.3682	28.0086	28.7948	28.388	44.8933	47.682	41.7421	20.4433	22.6822	15.2746	42.0519	28.1884	40.3177	17.2715	16.8665	15.021	21.409	23.5599	24.0979	13.1098	10.9973	15.9301	32.3248	29.9269	29.437	7.37526	7.9177	19.8225	23.4583	22.3363	20.171	35.8202	24.4363	28.1868	19.6983	16.1395
12q24.23	NM_001002	6175	RPLP0	ribosomal protein, large, P0	1.05188	0.0729662	0.0208796	0.286177	1228.8	1188.1	1989.15	1325.51	1596.07	1307.41	1377.72	1570.78	1399.04	1552.26	1586.82	1618.44	1639.06	1614.26	1537.31	1291.1	1410.95	1311.98	628.534	575.414	596.602	1133	949.494	1032.84	927.612	1385.7	996.462	1343.4	1622.81	1783.61	1276.49	1442.62	661.105	1523.01	1440.85	1512.57	1735.82	1657.62	1369.1	919.652	752.864
21q21.3	NM_016940	10069	RWDD2B	RWD domain containing 2B	1.37469	0.459103	0.0210162	0.286235	1.71412	1.6166	1.77793	4.08826	4.64687	3.37413	5.47301	5.87283	6.3746	7.1082	7.2658	7.25396	4.48827	4.98116	3.49429	3.24803	2.95836	2.77992	3.39579	2.50647	2.96007	4.24791	4.49534	5.53048	4.01117	3.33755	3.94612	5.93346	4.66241	4.01459	1.18949	1.09258	2.87713	1.83783	2.13723	1.38921	4.3242	3.40841	3.11748	2.95982	2.70607
7p22.1	NM_032172	84132	USP42	ubiquitin specific peptidase 42	0.89676	-0.157207	0.0210289	0.286235	4.53045	4.15355	3.28636	4.78732	3.55275	4.5013	3.68948	3.12344	3.40107	2.46601	3.01556	2.60424	4.38933	4.60117	4.66664	4.08263	3.90748	3.5899	5.22568	5.14114	5.27412	3.75809	3.44666	4.22963	3.91291	4.18832	3.74983	3.93573	3.58072	3.75407	2.6735	2.21437	4.07614	3.88124	3.98818	4.24524	3.63781	3.97017	4.63657	3.61076	4.18881
17p13.3	NM_018128	55720	TSR1	TSR1, 20S rRNA accumulation, homolog (S. cerevisiae)	1.14512	0.195497	0.0210326	0.286235	7.85242	7.18138	4.85216	7.60858	7.7076	7.77182	8.10307	8.01155	8.33427	8.59171	9.35694	8.00363	8.47639	11.4557	7.84657	9.25556	9.72626	10.0918	7.63697	8.0388	8.2197	5.90923	6.3251	6.11882	4.97104	3.62372	5.71797	7.59776	6.32531	6.94874	2.54518	2.37167	4.10612	6.35522	7.26685	5.98394	7.12759	6.31842	7.19794	5.64859	5.80761
17q23.1	NM_004859	1213	CLTC	clathrin, heavy chain (Hc)	1.08186	0.11352	0.0210463	0.286235	40.5373	31.5139	37.0759	35.6338	41.5595	36.5704	45.8466	45.309	39.0209	47.6035	61.7579	45.3081	36.411	35.8836	26.6013	42.6126	45.5665	52.9701	36.6304	36.6381	40.8748	31.7538	33.9474	33.6178	26.7754	20.6555	33.6328	40.0663	36.0455	37.1082	14.6821	13.1346	19.2797	34.4774	36.3182	34.8279	47.3781	39.2447	47.3187	30.7644	31.2901
6q21	NM_002356	4082	MARCKS	myristoylated alanine-rich protein kinase C substrate	0.917282	-0.124563	0.0210489	0.286235	99.8611	70.2085	74.1119	101.714	92.9373	110.017	76.3435	63.9254	71.9745	37.1279	48.2343	47.2099	82.0865	80.1322	84.3711	96.0797	152.406	79.8981	140.89	137.932	131.615	48.4679	45.0392	47.6665	120.129	175.614	153.792	82.3447	76.9658	83.0306	57.4297	46.2683	83.4071	87.1447	93.6853	79.7941	75.4107	88.651	107.791	67.6798	64.2624
7p13	NM_001146334	23148	NACAD	NAC alpha domain containing	0.752236	-0.410742	0.0210813	0.286235	9.23163	10.228	6.74886	11.295	9.81338	9.9819	5.60989	4.24763	5.8775	1.13727	1.69685	1.93494	6.5282	7.44885	8.83993	4.28515	7.89261	4.50308	10.9286	11.4795	12.6865	5.58095	5.23075	5.24058	10.5769	10.1654	8.70943	6.10928	7.00764	8.98114	13.8151	12.5385	6.64319	7.77932	7.96607	8.88734	5.77586	8.54157	6.72238	5.2288	7.09834
14q23.3	NM_198686	376267	RAB15	RAB15, member RAS oncogene family	0.881187	-0.18248	0.0211099	0.286235	6.46979	6.86281	5.27718	7.01904	6.70165	7.77979	4.74752	5.22533	5.46611	5.50561	5.66242	5.57331	7.42268	6.70727	7.16659	5.73105	6.52827	4.01525	14.7122	16.8633	16.528	6.88137	6.15169	6.44219	8.8393	8.0829	7.53453	5.7399	7.30934	7.83932	9.5692	8.75773	6.57712	6.69951	6.81616	6.69476	6.75183	6.07054	6.27189	6.16636	7.05394
14q32.31	NM_144574	91833	WDR20	WD repeat domain 20	1.44751	0.533577	0.0211134	0.286235	2.51326	2.88128	0.696073	2.29259	2.69835	4.18897	3.66226	2.13531	3.16405	4.26874	4.51424	3.78675	2.93097	3.73304	1.472	4.05675	5.25913	2.49031	5.63016	3.88723	1.14655	2.48554	3.93566	3.38957	2.03876	1.30713	1.67076	2.94602	1.17525	1.48589	0.960927	0.064178	2.08833	0.946871	2.08027	0.575795	2.45347	2.44275	1.58072	2.20832	2.4149
16p11.2	NM_001099784	54620	FBXL19	F-box and leucine-rich repeat protein 19	0.824434	-0.278524	0.0211679	0.286464	9.82652	12.5048	9.83279	13.0898	10.8226	9.19763	8.91218	6.98934	8.13261	4.90428	4.86319	5.78244	6.09037	8.3198	8.28553	5.00799	10.4546	6.43392	19.8203	22.9508	26.9625	7.19736	7.3216	8.67096	13.3824	12.8197	10.8096	9.58842	11.9582	12.9835	16.3778	15.7545	8.03928	11.2058	10.3899	10.7718	10.5622	10.0442	7.86914	8.01577	10.9934
5q35.1	NM_152277	92181	UBTD2	ubiquitin domain containing 2	0.910491	-0.135283	0.0211889	0.286464	10.8687	7.67346	7.07893	13.2797	12.0385	14.6528	13.0322	13.2371	12.8132	11.0406	13.8439	11.9828	13.1297	14.5214	13.3563	15.7024	19.1897	15.6009	16.5771	15.0037	13.4861	12.432	14.631	15.7349	11.5452	14.1988	13.2104	13.9661	10.7928	11.3977	6.73668	6.53284	17.4137	12.4986	12.8023	10.4714	12.2729	11.8422	15.0016	12.706	10.6882
11p11.2	NM_031909	114900	C1QTNF4	C1q and tumor necrosis factor related protein 4	0.753727	-0.407886	0.0212362	0.286464	0.609561	1.4669	1.20416	2.25911	1.20558	1.82138	1.62841	1.66869	1.80307	0.46907	0.403333	0.573758	0.882295	0.751525	0.506757	0.870543	0.72881	1.10954	2.83726	1.96576	3.92156	2.47967	1.57289	2.30332	1.43166	1.33714	1.35532	1.46385	2.05658	2.43006	2.5645	2.24277	0.667984	2.58334	2.93203	2.4678	1.7412	2.57418	0.890231	3.16276	1.81538
1q21.2	NM_005850	10262	SF3B4	splicing factor 3b, subunit 4, 49kDa	1.08488	0.117531	0.0212451	0.286464	11.9148	11.6575	10.6811	17.3608	16.3516	17.0976	12.7289	13.7433	14.5282	13.0544	12.1913	13.0168	15.3618	16.365	16.4184	11.838	15.4	13.0136	8.74825	10.057	10.5163	9.5339	8.57789	9.91762	9.92227	9.83166	9.37249	11.0221	12.9964	13.9584	15.1828	12.7039	10.1911	12.3885	13.5059	13.1174	14.7929	11.4192	11.5425	8.47719	10.2471
9q32	NM_001163788	9991	PTBP3	polypyrimidine tract binding protein 3	0.711712	-0.490634	0.0212755	0.286487	0.294018	0.000187	0	1.48952	1.93	2.36535	4.5064	3.19678	4.02116	3.32457	4.82	3.83818	3.1764	2.88765	0.847871	6.00763	2.85971	4.87954	2.54397	1.20298	1.80163	2.95138	3.62832	3.8278	2.69144	2.59333	4.44427	3.93748	4.38111	3.20872	1.5691	1.15243	5.29509	3.07532	3.83244	2.87596	5.94178	3.15032	5.80366	3.10655	2.76628
5q33.3	NM_006425	10569	SLU7	SLU7 splicing factor homolog (S. cerevisiae)	1.18401	0.243687	0.0213941	0.287696	10.8185	8.36176	9.38316	5.87125	8.09008	6.61769	6.85119	7.00607	6.72379	8.27126	10.4347	7.35453	8.65993	7.33607	5.95176	10.4752	8.86035	10.5935	4.8255	5.54848	5.80331	6.82349	6.88577	8.3939	4.29798	3.82243	5.40727	9.12571	7.28928	7.91439	2.08999	2.00821	2.02654	7.41991	6.88378	6.73265	7.67981	7.58878	10.8315	5.8997	5.02342
19q13.2	NM_002088	2901	GRIK5	glutamate receptor, ionotropic, kainate 5	0.755687	-0.404139	0.0214552	0.288129	6.01319	7.08713	5.56484	8.58319	5.95656	5.39221	5.83383	5.20046	6.24968	1.43464	1.79798	2.19652	5.79761	4.16815	5.84131	3.81932	4.09929	3.02879	5.57224	6.83715	8.46057	4.82311	4.82181	4.64054	9.27498	10.4266	6.70008	3.92516	6.61157	8.23765	13.3863	11.5764	5.56936	8.43829	8.20625	10.9057	5.73609	11.6722	6.15387	5.11145	7.15698
17p13.1	NM_001128827	1742	DLG4	discs, large homolog 4 (Drosophila)	0.856865	-0.222861	0.0215823	0.289447	31.0846	31.5172	22.6985	22.0365	20.5371	19.0102	12.9507	10.7261	12.4741	9.87026	9.39496	10.741	21.3389	24.3119	29.8588	11.9953	16.1779	7.91505	30.9499	33.169	35.3226	18.5324	14.1216	17.5968	20.4359	22.551	21.6232	18.4503	17.7002	21.2209	28.3582	27.4908	17.7454	19.3729	21.5387	22.1842	15.6477	19.8842	17.6446	17.139	22.0727
2p14	NM_020651	57162	PELI1	pellino E3 ubiquitin protein ligase 1	0.883323	-0.178988	0.0216445	0.28957	8.57211	5.01695	6.13826	5.97654	6.96251	6.22178	5.46598	5.18817	4.45351	4.85938	5.15597	4.42211	5.60572	5.48557	4.64265	9.01274	7.84493	8.88449	9.12044	8.76523	8.50675	6.33602	6.29174	6.53712	6.328	5.56862	7.28624	6.90672	5.67126	6.92733	3.58524	3.37624	5.35571	5.5729	6.39987	5.73408	6.10263	7.25118	9.1836	5.65468	5.73177
Xq28	NM_002910	5973	RENBP	renin binding protein	0.808096	-0.307401	0.0216495	0.28957	1.98212	1.80421	2.72278	1.57572	1.29724	1.11683	1.9905	1.35078	2.02934	1.64522	0.810129	1.25453	2.36309	2.31626	2.27793	0.957446	2.61435	2.12196	1.09201	1.77944	1.42539	3.10961	2.94033	2.95186	2.29713	2.41611	1.69884	1.59979	1.69859	1.63539	3.50434	2.52088	1.81845	2.31871	2.56036	2.64927	2.17006	1.60603	1.49033	1.58968	2.09972
11q23.2	NM_004724	9183	ZW10	zw10 kinetochore protein	1.17563	0.233435	0.0216844	0.289648	4.48861	3.94063	4.75859	4.21517	4.94475	4.2871	5.88811	6.5942	5.3534	5.7467	7.83167	6.18138	5.98151	5.14457	4.23303	7.4638	6.99099	8.67771	4.08482	3.51775	4.00371	4.55736	4.76949	4.69547	2.99202	2.38611	3.76586	6.52337	5.66267	5.43219	1.10659	1.3127	2.3099	4.87336	4.48462	4.32098	5.57261	5.16824	5.88906	4.48991	3.35755
20q11.21	NM_016408	51654	CDK5RAP1	CDK5 regulatory subunit associated protein 1	1.24549	0.316712	0.0217487	0.290049	6.45317	4.28807	4.19192	4.82411	4.67432	7.43483	4.3377	4.10212	4.69417	2.81236	3.31039	5.2811	4.95463	5.79733	5.45805	3.25773	5.56182	2.05003	2.4816	4.39612	3.72175	2.26057	3.48243	3.1364	4.64535	1.6425	3.75906	2.65083	3.28391	4.11129	3.11561	2.71589	5.3234	4.87974	4.44444	3.20104	3.92157	3.76667	2.61775	1.98623	3.83328
15q14	NM_014691	9716	AQR	aquarius intron-binding spliceosomal factor	1.10405	0.142808	0.0217726	0.290049	9.12429	7.55854	9.49184	7.5875	8.16104	7.74181	8.44385	8.91071	7.49435	8.3489	11.4311	8.19001	8.59501	8.71329	5.81309	11.2301	9.51693	11.6887	7.4054	6.95231	6.94609	7.42295	7.84081	7.45036	6.0996	4.79124	7.85874	8.09469	6.92287	7.93513	2.98878	3.31993	4.0046	7.57287	7.56569	7.08598	9.10803	7.79043	9.13538	6.45913	6.18926
12p13.1	NM_015987	50865	HEBP1	heme binding protein 1	1.17688	0.23497	0.0218366	0.290514	10.169	7.70674	9.09871	11.9927	10.1604	10.0572	7.73597	10.2837	8.02158	6.67152	6.61342	6.91195	6.8964	5.94541	5.64231	9.01681	5.72161	9.06439	2.81737	2.43695	2.48703	10.3543	9.28608	10.4794	6.35433	8.70747	5.64641	5.01093	7.94856	7.43702	6.01155	5.63362	3.50524	9.08774	8.90289	8.74224	8.71515	9.63674	8.25144	5.96284	5.55892
2p14	NM_015147	23177	CEP68	centrosomal protein 68kDa	0.890173	-0.167842	0.0219448	0.291565	4.51106	4.30081	3.49429	5.24397	5.08062	5.08213	3.90988	3.3636	3.54359	2.81341	3.04839	2.70776	4.55923	5.07687	4.58167	3.93276	5.07364	5.43874	6.53503	6.12867	6.0495	4.02332	3.99462	3.92142	5.03252	4.66897	4.80558	4.32584	3.6538	4.32059	3.85686	3.47604	4.58503	4.04031	3.8512	3.81413	4.4547	4.31798	4.82227	3.64889	3.79415
1p12	NM_001080470	90874	ZNF697	zinc finger protein 697	0.83397	-0.261932	0.0220684	0.292817	4.91864	4.34783	3.2851	4.26197	3.90144	5.0024	2.99173	2.44908	2.92727	2.19358	2.21844	1.93506	2.925	4.02152	3.28678	2.87668	4.9502	4.33529	8.41682	8.47146	8.94496	3.14318	3.17453	3.12775	4.0036	3.61555	4.10229	4.83772	3.83548	4.13907	3.00212	2.50426	4.37103	3.46795	3.70719	3.4597	3.51962	4.0596	3.6371	3.74958	4.16916
11q23.3	NM_025164	23387	SIK3	SIK family kinase 3	0.887969	-0.171419	0.0221375	0.292824	2.07897	1.97186	0.937335	2.41701	2.48079	2.94928	1.94392	2.0872	1.63952	2.81002	3.06641	2.77609	1.74019	2.97949	2.10253	2.69593	2.50622	2.62806	3.62914	3.35182	4.31982	2.79466	3.11253	3.02575	2.64513	1.50078	2.81877	2.68579	2.09904	2.22268	2.00653	2.11179	4.3318	2.31996	2.73594	2.60663	2.34553	2.53383	2.56568	2.94233	3.22085
11q24.2	NM_003139	6734	SRPR	signal recognition particle receptor (docking protein)	1.07471	0.103949	0.0221404	0.292824	24.2053	22.9328	17.8812	26.7261	25.6075	28.8406	26.7226	27.643	31.0244	30.7339	33.1158	34.461	22.8919	29.7988	24.8634	27.9206	35.7238	35.8342	16.0859	16.7223	15.417	27.4725	25.1991	28.3553	17.2681	12.5962	19.9857	29.1547	27.3322	22.9829	11.6418	9.88378	23.0621	28.9057	34.8683	27.3795	28.8284	20.0904	25.6751	25.4898	25.4679
9p13.3	NM_147202	203259	FAM219A	family with sequence similarity 219, member A	0.75498	-0.405489	0.022157	0.292824	11.2513	11.943	5.87811	7.98479	7.84352	8.13665	4.97267	4.1469	4.33777	2.46752	2.25597	0.842788	6.16031	8.88119	9.75357	4.44824	8.61758	5.73201	14.2148	15.7884	17.5646	6.34491	4.74356	6.6132	11.7948	11.473	9.9726	6.38603	8.29994	3.32919	7.78024	8.89501	4.5385	5.29098	7.61325	4.88253	6.50741	5.72562	7.76057	5.55784	6.66116
2p13.3	NM_032601	84693	MCEE	methylmalonyl CoA epimerase	1.19581	0.257987	0.0222023	0.292946	4.67659	4.15585	6.36701	5.73087	7.28188	6.01771	7.7343	7.91408	7.09929	9.9336	8.77045	10.6978	7.47569	6.12204	6.54772	6.24448	6.99288	6.71629	2.88033	2.97965	1.93951	4.09143	4.74342	5.87196	5.46294	5.93855	3.95749	7.2753	6.04652	6.29933	4.80551	5.34022	3.45122	8.72122	8.95021	8.02032	8.86307	6.90309	6.76782	5.76607	3.80839
4q35.1	NM_020225	56977	STOX2	storkhead box 2	0.813792	-0.297269	0.0222249	0.292946	7.286	6.8686	4.57567	6.4139	4.9156	5.81551	5.27308	5.21839	4.99216	1.97938	2.44005	2.19855	4.28604	5.76553	5.23559	6.06911	6.42427	5.15312	10.2362	10.7815	10.5041	5.77635	6.37699	5.84857	8.05709	5.28667	6.82787	5.39005	4.35552	4.91998	2.73159	3.11751	4.98607	4.4611	5.51439	5.07856	4.51524	5.35171	6.06577	5.93249	7.54096
15q14	NM_020154	56851	EMC7	ER membrane protein complex subunit 7	1.08602	0.119052	0.022266	0.293101	18.4556	16.1686	14.5108	22.2628	24.0658	21.3727	26.0795	25.7403	26.2504	30.7259	34.85	31.9743	23.1206	29.3773	26.1458	24.4241	22.1211	17.7551	21.4592	19.681	17.2923	25.3931	24.0167	27.1385	13.1623	15.2175	15.7411	23.6722	19.1993	19.8765	11.4636	8.49727	17.252	16.8162	22.8799	16.2112	23.6498	19.4655	22.5576	23.9927	18.9858
11p13	NM_003477	8050	PDHX	pyruvate dehydrogenase complex, component X	1.19394	0.255731	0.0223449	0.2934	12.2383	10.2626	8.91089	6.82469	6.85936	6.21672	8.62411	7.13247	7.5265	9.6759	8.34831	10.6999	4.69783	6.7468	8.37158	8.36196	7.73744	8.99805	8.62354	10.8034	8.04037	6.23134	7.72655	11.7625	5.14145	2.36261	4.4082	8.1704	5.64419	7.00383	3.57439	4.08121	7.84103	7.75211	7.77774	6.2107	5.22251	4.46211	6.55942	4.80397	7.43376
1p36.11	NM_005563	3925	STMN1	stathmin 1	0.934349	-0.0979662	0.0223736	0.2934	237.473	209.604	249.556	218.802	220.371	233.64	139.278	146.639	137.342	78.1267	98.8654	92.6759	176.088	196.21	171.474	251.088	374.314	225.226	483.126	440.94	391.496	179.244	153.83	162.855	207.361	170.202	222.11	220.857	226.603	249.844	89.1336	74.9198	111.629	169.297	187.82	139.128	172.827	199.754	200.001	142.959	157.631
2p25.1	NM_145693	23175	LPIN1	lipin 1	0.873849	-0.194545	0.022398	0.2934	3.64139	3.08596	1.98527	3.25232	3.09634	4.66598	3.99103	3.66809	3.828	4.38246	4.89659	4.66936	3.58199	5.05614	4.5787	6.28203	4.63207	4.21939	4.87969	5.44821	4.9082	6.06601	5.78753	5.25018	3.32126	2.86112	3.23428	5.79202	3.86858	3.97533	1.76236	1.84175	3.82584	4.90282	5.5387	4.24237	4.3619	3.28475	4.23327	5.03552	5.50557
9p22.3	NM_001039697	6619	SNAPC3	small nuclear RNA activating complex, polypeptide 3, 50kDa	0.876524	-0.190134	0.0224092	0.2934	13.3624	9.95271	8.40866	9.01537	8.19287	9.173	9.52255	8.48993	9.00211	6.17202	7.07759	5.6091	7.31622	8.1418	7.45932	12.5642	11.6753	11.9227	13.3676	13.0811	11.1917	11.4459	12.981	12.3779	8.66968	7.9017	12.273	10.8069	8.28692	9.41776	4.7042	4.23261	8.90828	9.81871	10.3865	10.1857	8.60448	9.22067	12.4302	11.0759	9.40559
11q13.1	NM_173587	283248	RCOR2	REST corepressor 2	0.871387	-0.198615	0.0224383	0.2934	36.4329	39.859	38.442	35.3724	27.4073	31.2834	27.8392	17.9002	24.2314	9.84607	9.82404	11.9124	30.87	31.5716	33.1068	29.9186	53.6693	24.707	23.127	22.1721	22.5547	34.134	29.8279	33.7965	24.6972	27.3942	25.773	22.676	24.3622	31.1996	26.7774	30.3202	14.8624	24.5423	25.7144	29.244	21.9403	26.9713	28.9542	24.5872	22.8537
7q11.23	NM_001077621	155382	VPS37D	vacuolar protein sorting 37 homolog D (S. cerevisiae)	0.797637	-0.326196	0.0225188	0.2934	11.3509	11.3244	15.2054	10.5801	12.3784	7.904	6.75408	6.98386	7.27483	3.39271	3.04467	3.27282	7.75957	8.87663	8.96808	4.94598	9.13281	6.734	14.7363	11.7867	15.5524	8.74969	6.63682	7.75245	8.57729	11.1772	9.16789	7.25301	9.6888	12.7242	12.3091	10.464	4.90443	10.2057	9.98982	8.60743	7.92003	11.757	9.03225	8.46909	9.01062
18q12.2	NM_020474	2589	GALNT1	UDP-N-acetyl-alpha-D-galactosamine:polypeptide N-acetylgalactosaminyltransferase 1 (GalNAc-T1)	1.14255	0.192253	0.022531	0.2934	13.6743	10.3234	11.4041	17.6318	22.4008	21.0931	26.1076	26.6981	25.3541	45.8423	61.2264	48.6561	24.137	20.124	13.6243	24.4429	19.4748	22.3378	17.0881	15.0399	15.9364	21.1377	23.9749	22.8688	10.7894	8.94418	13.0472	25.7435	23.8037	22.4764	7.24624	6.5648	11.1699	18.736	16.8764	15.0869	28.3782	21.2002	26.3734	21.066	13.5135
1p36.33	NM_152486	148398	SAMD11	sterile alpha motif domain containing 11	0.732684	-0.448737	0.02258	0.2934	2.50801	2.69254	3.33012	11.6916	10.2822	9.07925	6.02557	8.8224	6.12153	4.94386	5.82759	6.31682	5.94846	6.45059	5.59344	9.24077	9.23901	13.5077	2.84055	2.29663	3.59457	13.5582	11.7467	13.1316	4.66994	4.3883	3.08675	11.5538	15.4657	16.8438	34.4928	26.0439	13.2495	12.6005	10.2475	12.1477	11.4342	13.1798	9.01625	9.66905	8.10859
1p36.31	NM_001042663	57449	PLEKHG5	pleckstrin homology domain containing, family G (with RhoGef domain) member 5	0.678477	-0.559629	0.0226288	0.2934	1.9297	4.12698	2.45842	3.90725	4.29577	2.36711	0.71431	1.33846	0.001556	4e-06	0.135503	0.002811	4.09564	3.57981	5.83188	1.74222	2.55074	2.54278	2.55964	2.86505	1.27461	4.04463	2.89581	1.9891	4.8635	2.50144	2.53428	2.37791	3.15446	3.32898	3.40865	4.08279	2.64284	1.97287	3.48147	4.20286	2.03969	1.31352	0.919456	1.68335	2.88005
14q22.3	NM_002306	3958	LGALS3	lectin, galactoside-binding, soluble, 3	1.21208	0.27748	0.0226355	0.2934	7.31112	7.44473	14.0606	14.2835	21.5467	22.5117	14.6755	22.2852	19.2713	15.1839	15.3634	14.2414	18.2879	19.1884	16.3956	24.1435	20.7438	14.695	4.72294	3.98587	4.28771	9.728	9.02723	8.66992	11.2462	17.2999	11.3518	11.6392	14.0481	17.3624	5.26016	9.58862	4.52959	26.2614	15.5963	16.9336	20.8867	18.8588	16.7388	9.75303	5.31226
17q25.3	NM_025161	80233	C17orf70	chromosome 17 open reading frame 70	0.876048	-0.190917	0.0226963	0.2934	5.21816	5.24055	5.64991	7.49251	6.26314	6.58777	7.68005	7.03768	6.55568	5.14758	3.74192	5.34331	6.51956	5.47908	6.84901	4.22382	6.62887	6.95645	8.81989	8.5814	10.4285	5.98931	5.06613	5.99385	7.57913	6.47463	4.96202	5.94012	7.64377	10.0006	9.61282	8.70686	5.0485	7.40213	7.46258	7.70381	7.10526	8.09912	5.43679	6.44581	6.34706
3p21.1	NM_205853	389125	MUSTN1	musculoskeletal, embryonic nuclear protein 1	0.736494	-0.441253	0.0227177	0.2934	1.44101	0.801878	1.80346	0.742413	1.4153	0.472558	0.45944	6.6e-05	1.28017	1.04784	1.24627	0.512534	1.03233	1.30747	1.00851	1.4327	2.00672	2.19973	1.68501	1.08519	1.14981	3.02775	3.00178	3.16809	5.07059	7.10793	4.72919	0.874814	0.517693	0.903542	2.13806	1.08296	1.69976	1.84503	1.63941	1.47337	0.590812	1.97172	0.940821	1.17839	2.05163
9q32	NM_032303	84263	HSDL2	hydroxysteroid dehydrogenase like 2	1.14728	0.198218	0.0227805	0.2934	7.84273	5.12598	5.22696	8.731	9.73632	9.35517	11.7452	10.0695	11.6728	21.6745	24.9579	19.2997	7.77613	7.18312	5.47901	10.0654	7.87186	9.97169	7.70621	7.01981	6.73189	8.95675	10.6416	10.8688	5.80317	5.60016	7.14197	12.8754	9.27949	10.0894	5.59795	5.14815	10.4892	9.22946	8.60431	8.69533	12.0721	11.1376	11.6733	9.38679	6.82973
19p13.2	NM_001420	1995	ELAVL3	ELAV like neuron-specific RNA binding protein 3	0.642529	-0.638167	0.0227873	0.2934	10.3315	12.4405	7.59239	5.06796	6.0246	8.26916	4.19706	1.89657	0.821617	0.006745	0.567474	0.605094	5.28682	6.66264	9.82042	5.8484	4.07858	1.33847	14.7124	16.7502	18.3508	4.16356	2.74574	3.41868	7.75287	8.52808	9.60858	3.36466	3.453	4.57918	5.24959	5.93641	3.06263	5.38297	5.30168	4.97497	3.44951	6.62834	3.33789	7.04464	6.22763
12q24.33	NM_001122636	50614	GALNT9	UDP-N-acetyl-alpha-D-galactosamine:polypeptide N-acetylgalactosaminyltransferase 9 (GalNAc-T9)	0.732327	-0.44944	0.0228118	0.2934	3.11003	2.54915	2.96562	4.8128	5.10569	4.37712	1.47491	1.48544	1.59678	1.17563	1.05011	1.13728	3.50803	3.07126	3.85368	1.15368	1.74698	1.85961	6.23241	5.9263	6.81712	2.81419	2.9241	3.0648	1.77056	2.55817	1.94076	3.13299	3.31797	4.4797	4.66803	5.25767	1.95403	3.77838	3.58013	3.67849	2.74718	3.48233	2.70713	5.135	5.81107
1p22.1	NM_014597	30836	DNTTIP2	deoxynucleotidyltransferase, terminal, interacting protein 2	1.16143	0.215904	0.0228144	0.2934	12.2725	10.9634	14.192	11.9395	17.3967	14.59	11.018	11.5596	11.5456	11.6389	16.3159	11.9264	22.1765	17.5718	14.1924	15.6726	13.5861	17.2927	8.9254	8.89265	10.5372	8.1672	9.92695	9.47768	6.33089	4.65894	8.03538	12.3853	11.2765	13.0555	3.6382	3.37869	3.09192	10.3356	10.6754	10.8578	13.0323	11.3567	16.5788	9.08821	8.44344
11q14.1	NM_024079	79053	ALG8	ALG8, alpha-1,3-glucosyltransferase	1.14564	0.196159	0.0228503	0.2934	7.69274	6.29314	7.98347	8.86252	9.27096	9.95467	11.3702	12.2534	13.7286	15.1457	18.7721	15.7827	7.87401	10.221	7.72086	15.5336	12.7475	13.0027	4.95529	3.98086	4.44663	10.4752	10.0312	9.53245	6.87484	8.97622	7.70486	9.03272	7.93662	8.58749	5.82659	5.13803	11.5883	10.047	10.457	8.51796	9.43219	7.74755	9.93926	11.2284	7.27422
16p13.13	NM_002094	2935	GSPT1	G1 to S phase transition 1	0.904514	-0.144785	0.0228567	0.2934	8.05828	6.53872	4.49949	7.22852	8.40845	7.08172	7.34395	8.36715	5.41083	8.00028	7.26507	6.40083	9.96308	8.15464	8.37409	10.6893	9.16587	8.43236	8.72805	8.88841	11.1376	8.31324	8.0516	8.38285	7.8047	6.05344	6.70184	8.303	7.13816	8.37279	3.97336	3.71073	7.48207	7.44193	7.53046	8.00451	8.54087	8.244	10.2003	5.8708	6.12843
16q22.1	NM_138383	92154	MTSS1L	metastasis suppressor 1-like	0.843757	-0.245101	0.0228709	0.2934	19.5151	20.9808	15.9484	15.2112	14.6526	14.0629	10.6653	9.64825	10.9695	7.1763	7.13335	7.93772	13.8346	15.5499	20.1427	7.8711	9.42365	7.43904	20.0147	22.6174	26.6992	10.9999	8.84473	11.5463	19.111	17.2568	15.4992	12.6622	14.3301	16.8465	31.5625	27.149	17.7244	16.2753	15.8747	17.505	11.951	13.8552	12.6101	17.1708	19.8851
12q24.13	NM_138432	113675	SDSL	serine dehydratase-like	1.27969	0.355795	0.0229202	0.2934	1.56551	1.59323	1.66454	1.7653	3.0045	1.65702	3.1639	3.46983	4.03183	1.5322	2.00352	1.86952	1.7292	1.52371	2.05496	1.67685	2.35497	1.38055	1.15758	1.19214	1.3119	3.01655	1.95886	1.82469	0.795888	1.95791	0.615895	2.12015	3.50653	2.60047	1.69779	2.33038	1.0418	1.61165	1.46468	1.787	2.40704	1.92873	1.29725	2.01063	1.36958
17q21.31	NM_002390	4185	ADAM11	ADAM metallopeptidase domain 11	0.73989	-0.434618	0.0229378	0.2934	1.3185	1.21014	1.44284	2.79868	2.64095	2.95613	0.750171	1.21719	1.02154	0.632163	0.547984	0.788494	1.91366	1.94965	2.06326	1.2321	2.60102	2.46288	2.08126	2.35288	2.71249	9.89556	8.68863	8.31612	2.66313	1.6567	1.45219	1.52618	1.34994	1.67122	3.91521	2.97069	1.79115	2.41594	1.94324	2.5416	2.36842	2.28763	2.40558	1.20615	1.59535
17q21.32	NM_005831	10241	CALCOCO2	calcium binding and coiled-coil domain 2	1.19636	0.25865	0.0229416	0.2934	5.21996	4.23	5.36867	5.77699	8.61061	6.74591	9.37501	9.51187	8.14193	10.1946	13.2538	10.4025	6.51616	5.48876	3.64864	11.1492	9.08915	12.6033	2.53175	2.44706	2.86885	9.4192	9.02372	9.7271	3.6022	2.5424	4.23841	9.53306	8.87845	9.14379	2.13655	1.87477	3.19956	8.04464	8.1251	7.26997	10.5934	8.24422	9.92079	5.67664	5.23518
2q33.3	NM_005006	4719	NDUFS1	NADH dehydrogenase (ubiquinone) Fe-S protein 1, 75kDa (NADH-coenzyme Q reductase)	1.06604	0.0922617	0.022965	0.2934	18.1586	16.8198	14.6204	21.0327	22.1773	18.8882	29.1881	29.8821	27.5396	20.0037	24.6302	21.0223	20.6772	20.972	17.1298	15.645	22.3377	25.41	18.802	19.621	20.2414	15.7964	17.2822	16.5202	13.7677	10.4946	14.8875	21.1911	20.5055	21.0922	10.9766	10.0225	16.6205	18.4246	20.0388	17.9072	24.9921	23.024	21.4114	23.3413	22.4999
19q13.32	NM_015649	26145	IRF2BP1	interferon regulatory factor 2 binding protein 1	0.884781	-0.176608	0.0230586	0.294218	7.34452	8.81018	8.09059	9.57967	11.3916	8.04231	5.83517	6.77376	8.31288	5.76652	5.71922	6.84687	9.69895	8.49241	10.1107	7.16235	7.1798	6.94853	7.96364	7.72114	10.923	10.1407	8.19589	11.7572	7.85529	7.36964	6.465	8.17786	9.78087	11.8774	10.8127	11.0358	5.46527	10.4153	9.45216	9.76168	9.18631	8.91569	5.89869	9.09705	7.23874
1q32.1	NM_004433	1999	ELF3	E74-like factor 3 (ets domain transcription factor, epithelial-specific )	1.42435	0.510302	0.0232234	0.295523	0.598826	0.199159	0.670538	1.37061	3.57822	3.508	1.24198	1.62746	1.70345	5.36723	5.38905	4.77604	1.78701	2.7115	2.00597	2.19851	1.87045	1.56789	0.014462	0.029486	0	1.47157	2.00456	2.15294	0.643007	0.418268	0.401072	2.41274	3.53974	3.18361	0.545003	1.11267	1.19129	1.99195	1.00207	2.07893	3.51603	1.79692	2.30317	1.0187	0.265671
12q23.3	NM_003299	7184	HSP90B1	heat shock protein 90kDa beta (Grp94), member 1	1.08386	0.116176	0.0232272	0.295523	102.292	77.3739	100.385	97.0169	133.52	114.014	146.998	160.505	131.134	227.778	319.315	227.75	123.728	109.79	64.7441	250.065	139.296	215.638	51.8949	57.4012	71.2487	100.03	101.892	102.879	56.8779	30.7633	75.8351	175.235	168.622	160.432	37.3396	37.5597	37.587	113.264	101.885	96.5966	199.687	134.951	192.424	117.888	104.983
17p11.2	NM_016078	51030	TVP23B	trans-golgi network vesicle protein 23 homolog B (S. cerevisiae)	1.11287	0.154285	0.0232918	0.295523	13.684	9.26091	13.1894	10.5366	12.7829	10.272	13.1758	12.1305	12.0731	15.3366	20.4137	16.3174	13.254	11.4383	10.2271	12.3259	13.1875	14.7295	9.54082	8.93273	7.32042	12.2909	14.7422	13.7169	6.73773	4.99014	9.80706	15.6831	12.1133	13.3242	4.15677	3.62712	7.09848	12.5416	11.2182	11.3145	13.2909	12.5443	16.2708	12.606	10.5929
3q21.3	NM_006026	8971	H1FX	H1 histone family, member X	0.922062	-0.117064	0.0233012	0.295523	120.959	124.684	140.664	85.3148	81.9478	70.1986	58.4598	52.7711	63.6288	42.507	36.6442	43.977	130.825	124.727	148.06	59.9979	70.9506	50.1437	59.4481	52.3791	69.5838	99.3328	66.6483	85.8821	58.4739	73.2012	57.6983	59.6634	70.8619	92.0985	96.0846	88.3304	39.8923	89.8566	92.9861	102.851	73.2316	79.8807	67.556	78.6119	69.1254
22q13.2	NM_022098	63929	XPNPEP3	X-prolyl aminopeptidase (aminopeptidase P) 3, putative	1.1343	0.181799	0.0233089	0.295523	3.74418	3.43233	2.61964	2.99492	2.78015	2.55389	3.45821	3.23486	3.53524	3.48518	4.07437	3.69	2.57402	2.5852	2.53596	3.29398	3.70399	3.98451	1.81988	1.71167	2.14357	2.77561	2.87432	3.04002	2.51168	2.2133	2.7822	2.61272	2.35178	2.33281	2.00738	1.66618	3.46661	3.33411	3.77186	3.71685	3.21034	3.23768	3.68348	3.05181	3.31531
14q24	NM_006925	6430	SRSF5	serine/arginine-rich splicing factor 5	1.10135	0.139269	0.0234399	0.296807	23.1352	17.2444	17.6376	55.4777	64.1113	59.6106	47.3722	42.0834	45.844	41.5995	50.3933	48.6893	56.1863	55.1816	42.1782	24.7343	62.5278	39.7465	25.2368	24.7856	28.2352	27.3562	26.5816	23.1169	22.3802	14.0307	30.2421	47.0445	43.5662	47.2271	10.0167	11.3149	15.5176	35.3361	36.7804	33.1572	52.4906	34.8113	47.559	46.5239	39.0758
5q32	NM_001387	1809	DPYSL3	dihydropyrimidinase-like 3	0.793333	-0.334002	0.0235016	0.297149	98.9082	97.7157	46.42	66.6736	63.6614	80.4631	47.3848	32.4954	36.4748	5.99107	9.83405	10.3016	42.3767	60.8389	51.3061	45.4233	91.2639	35.6323	208.231	214.501	204.773	25.0918	22.9233	21.2496	95.1591	76.1802	97.2486	67.2688	53.3526	62.7891	19.7557	21.3427	36.2352	40.8442	52.9691	40.1033	43.8053	63.0253	62.4434	46.6241	59.6602
12q13.12	NM_175736	91010	FMNL3	formin-like 3	0.855712	-0.224803	0.0235463	0.297149	1.2705	1.52781	0.979131	1.81532	1.74531	1.80219	1.71605	1.94158	1.84409	1.59223	1.81214	1.78697	1.43162	1.59412	1.16641	2.79127	3.38979	3.37878	1.21197	1.32208	1.54645	2.52775	1.97493	2.14103	3.12479	2.10917	2.22882	1.8805	2.20167	2.53011	2.92779	3.13431	2.84768	2.57142	2.0714	2.78197	2.37591	2.01525	1.69863	1.41	1.62885
8q24.22	NM_173344	6482	ST3GAL1	ST3 beta-galactoside alpha-2,3-sialyltransferase 1	1.49231	0.577547	0.0235563	0.297149	2.48755	2.83872	1.31662	5.54361	5.74002	4.73904	5.22849	6.61848	7.81851	17.7242	20.8545	19.4905	6.65884	6.03723	7.26722	5.9177	2.02495	3.93427	1.60185	1.17076	1.28947	12.5202	9.1825	16.2837	1.9099	0.852805	1.21593	5.95081	5.5396	5.90008	2.53313	2.29766	2.5756	7.42746	7.63233	4.42997	5.28789	4.69804	4.18023	3.04083	2.77352
14q23.3	NM_004094	1965	EIF2S1	eukaryotic translation initiation factor 2, subunit 1 alpha, 35kDa	1.12513	0.170094	0.0236376	0.29756	14.3723	10.3357	13.9078	10.102	13.1221	10.5343	11.4071	11.3606	11.5849	11.6765	14.2582	10.998	18.3156	15.0826	12.4001	14.0978	13.2463	12.4632	12.1467	10.5726	10.5835	8.70573	9.21991	9.14695	7.00111	6.75474	10.4151	11.4471	9.49885	10.5091	3.45846	3.84949	5.24134	10.5342	10.5174	9.35157	11.1403	9.70909	14.4842	10.2703	8.19821
1q44	NM_015446	25909	AHCTF1	AT hook containing transcription factor 1	1.12605	0.171275	0.0236486	0.29756	7.88348	6.50523	6.52972	6.59712	7.33189	7.08776	7.11342	6.7527	6.01978	7.89996	10.39	7.57712	7.15318	7.65261	5.45582	8.23186	7.20217	9.53003	5.99723	5.88461	6.04561	6.62092	7.05382	7.18924	4.80818	3.13957	5.88827	7.45679	6.71782	6.68767	2.35207	2.26528	2.92226	6.07032	6.41047	6.10111	8.75677	6.74354	9.52917	5.99024	6.23339
17q22	NM_182569	284161	GDPD1	glycerophosphodiester phosphodiesterase domain containing 1	0.806129	-0.310917	0.0237761	0.298334	2.95865	2.52254	2.58019	3.97813	2.74551	3.49565	3.29931	2.41115	2.77361	0.960181	1.52529	1.05998	2.58833	2.23635	2.44994	2.33502	3.5468	2.12112	5.76642	5.18482	4.81866	2.59676	2.84195	2.82688	3.0819	5.136	3.77301	2.19541	2.46153	3.18312	2.71001	1.6926	2.51349	3.15455	3.77718	3.23998	2.51046	3.72831	3.03032	3.43481	3.67197
4p16.1	NM_025196	80273	GRPEL1	GrpE-like 1, mitochondrial (E. coli)	1.11623	0.158631	0.0238023	0.298334	9.85611	8.50676	7.86612	10.2325	12.3255	11.7222	12.1148	11.8595	11.8781	11.769	14.4496	11.1287	13.6111	16.9842	12.2911	11.9371	12.3261	11.2883	13.5559	14.0165	11.2695	7.66004	8.8374	7.73509	6.93772	6.33128	7.23927	10.2588	8.28357	9.52852	4.00432	3.9764	9.77963	8.67579	9.31545	7.75224	8.90983	8.19908	9.81329	9.40442	8.11352
20q13.33	NM_004535	4661	MYT1	myelin transcription factor 1	0.748196	-0.418511	0.0238028	0.298334	4.75733	4.67803	1.88109	5.48377	4.21505	5.50573	2.74921	1.85159	2.03457	0.365079	0.385436	0.54576	3.08935	3.70054	4.17633	2.07598	4.1058	1.60347	5.10361	5.40658	5.47984	4.04582	3.3719	3.50611	3.66473	2.88147	3.17659	4.01978	3.44527	3.36975	3.22433	2.97352	2.13223	3.72946	4.04608	4.23396	2.29937	3.20587	2.99125	2.73083	4.298
9q21.32	NM_005077	7088	TLE1	transducin-like enhancer of split 1 (E(sp1) homolog, Drosophila)	0.896314	-0.157924	0.0238297	0.298334	8.33683	10.533	6.01308	8.06253	7.59454	9.15269	8.08157	7.09757	6.91775	6.54964	7.41426	6.25815	7.99077	12.0298	9.05646	8.76805	8.43185	7.97923	14.046	15.1242	16.8809	9.38983	7.50858	8.20088	12.0776	10.3796	9.82837	7.83878	7.37169	9.22775	6.24169	10.0273	5.75224	9.84038	9.67863	7.84927	7.89303	7.79724	8.21645	6.5944	6.94956
5q11.2	NM_176806	4338	MOCS2	molybdenum cofactor synthesis 2	1.17971	0.238435	0.0238771	0.298554	3.52027	2.84297	3.59511	2.77961	3.79539	3.40033	3.28819	3.22716	2.6056	4.32498	4.8506	3.80323	3.76792	3.83029	3.06978	3.62412	3.74526	3.69403	4.56282	3.41817	2.96214	2.19137	3.02022	2.87905	2.26892	1.78509	2.80674	3.59458	3.22567	3.43018	1.28583	0.955266	2.5149	3.20686	3.15165	2.39529	4.13544	3.71029	4.36721	2.6788	1.63563
2p24.3	NM_004939	1653	DDX1	DEAD (Asp-Glu-Ala-Asp) box helicase 1	1.11967	0.163076	0.024101	0.299905	20.5794	16.4389	19.6801	21.2094	27.9273	23.4945	24.8669	25.365	23.3088	29.4153	41.4979	29.1782	29.5894	23.4661	18.5624	27.5044	28.0574	33.3044	18.4742	17.3816	22.2338	19.184	21.7373	20.4692	12.4115	9.92378	15.3844	23.4332	26.8729	25.504	6.66333	7.47116	6.93677	20.6924	19.3998	19.0628	27.3071	23.6084	28.7454	16.7912	15.7174
8q12.2-q12.3	NM_173519	157807	CLVS1	clavesin 1	0.721839	-0.470251	0.0241285	0.299905	3.29699	2.94241	3.46661	2.44604	2.19133	2.21573	1.51753	1.09734	1.02012	0.314046	0.682545	0.602215	2.92339	3.03203	3.56024	1.74885	2.64199	1.37964	7.36668	7.2323	6.41964	4.20669	4.32601	4.0664	2.29498	3.06058	2.44716	2.27323	2.14026	2.44931	0.59103	0.823893	1.21756	1.65766	2.01154	1.87368	1.72604	2.80622	2.55862	2.10094	2.19006
14q32.11	NM_002802	5700	PSMC1	proteasome (prosome, macropain) 26S subunit, ATPase, 1	1.09358	0.129058	0.0241588	0.299905	34.7577	29.9087	38.3744	37.7094	49.4231	38.7319	43.6098	45.7723	43.5756	39.2834	48.0524	42.3197	41.4871	42.7351	29.1792	46.5245	51.2396	55.1259	35.8884	30.9246	35.4161	32.0256	35.5442	35.757	21.607	14.5494	26.2254	43.4764	38.5341	44.26	10.4939	11.7868	13.1926	32.9477	30.2951	28.7351	46.5769	40.9578	44.3912	27.5841	26.2791
19q13.42	NM_031896	59284	CACNG7	calcium channel, voltage-dependent, gamma subunit 7	0.691255	-0.53271	0.0241684	0.299905	10.807	11.829	9.71792	8.43138	6.2815	6.86391	6.39318	4.5495	5.73048	0.508728	0.740337	0.659086	6.65228	6.13334	7.61082	3.46696	4.21102	2.45305	20.9571	19.5885	20.5586	5.84756	5.30856	6.20481	10.0474	11.1228	9.95738	4.0694	5.14084	7.06385	10.995	10.595	4.48054	7.31391	6.86908	8.22932	5.29601	9.10035	7.03249	5.54274	6.89983
7q22.1	NM_003910	8896	BUD31	BUD31 homolog (S. cerevisiae)	1.07436	0.103476	0.0241795	0.299905	28.374	23.263	32.6099	26.0554	26.0518	22.6753	27.0155	28.7608	28.8775	20.4936	23.8408	23.0303	28.5596	27.516	28.3884	23.402	27.4791	25.5724	25.9851	21.6006	19.716	13.0755	13.9741	15.7216	13.3769	19.5354	19.6998	25.253	22.5436	22.2797	9.28953	10.9803	15.0385	23.0532	24.2879	20.3332	25.9427	21.4312	28.6533	24.0355	20.4615
17q23.3	NM_002805	5705	PSMC5	proteasome (prosome, macropain) 26S subunit, ATPase, 5	1.13788	0.186354	0.0242132	0.299905	15.5262	13.1803	10.0278	16.1305	19.2123	19.7212	18.6811	16.1562	15.3162	19.9598	17.5639	19.7487	13.424	17.2797	12.5457	19.7154	24.0031	26.7653	17.3479	13.4077	16.274	16.6385	15.4155	14.0051	8.22032	7.27832	10.6222	16.2333	14.7376	16.2882	4.6411	5.4804	10.6033	10.2731	9.96637	10.4097	19.3782	12.2242	19.0688	11.4575	10.2177
11q13.4	NM_016055	51642	MRPL48	mitochondrial ribosomal protein L48	1.09752	0.134251	0.0242471	0.299905	11.2049	9.3613	12.0359	12.5883	17.4492	12.0649	12.9181	14.3038	14.0041	15.2149	13.7638	14.2132	11.5093	12.8359	11.0984	15.5395	17.9607	15.4046	16.3291	13.9693	9.89581	11.4679	12.0958	13.2659	6.70766	8.5488	10.5692	11.745	12.1078	14.6222	4.1612	4.79715	9.19852	11.2593	10.1524	10.1794	13.9701	11.3643	11.8117	11.7098	8.78939
2q37.3	NM_001040445	51665	ASB1	ankyrin repeat and SOCS box containing 1	1.13454	0.182102	0.0242489	0.299905	4.90542	4.39989	2.30915	5.30255	4.56435	5.20776	4.13979	3.9267	4.24761	4.30337	4.1948	4.15728	3.91526	5.0907	5.23535	3.50691	4.06135	3.95832	3.61102	3.63652	3.98652	4.46903	4.78104	4.24854	4.61893	3.27204	3.20079	4.8163	3.44851	3.57341	2.44962	2.33201	4.0716	3.86826	4.41391	3.59894	3.96147	2.8567	3.26878	3.19887	3.61219
16p13.3	NM_032271	84231	TRAF7	TNF receptor-associated factor 7, E3 ubiquitin protein ligase	0.924922	-0.112596	0.0242664	0.299905	18.2427	19.495	20.1157	18.1459	16.1888	15.2878	18.5662	17.7098	20.4405	18.1267	17.1485	19.8137	18.9168	19.7247	21.5425	14.3942	19.2504	17.4869	17.3052	17.1529	19.1532	21.401	18.163	20.8616	16.7501	17.2882	14.7452	19.9198	22.0496	25.0263	40.1221	35.1059	20.4548	23.9493	23.9944	25.8385	20.1685	20.208	13.59	19.5012	20.023
1q23.3	NM_006917	6258	RXRG	retinoid X receptor, gamma	0.70222	-0.510004	0.0242858	0.299905	0.825356	0.937114	0.571021	5.70512	6.09791	6.0657	3.52208	4.33353	3.50137	1.99201	2.19614	2.51731	2.90638	3.65288	2.18355	7.03407	8.91452	10.0033	1.35864	1.40954	1.57067	4.55409	3.21421	3.56045	3.25455	2.35655	2.82178	3.97357	4.40943	4.3367	13.4861	13.0581	11.067	6.15493	5.46159	3.89167	6.11949	6.17954	4.2338	3.97579	2.2097
16p11.2	NM_001145524	83719	YPEL3	yippee-like 3 (Drosophila)	0.894412	-0.160989	0.024406	0.30088	12.5355	14.2828	12.6428	16.847	19.8005	16.0782	14.6269	13.6958	13.0702	10.7153	10.8139	13.1101	13.8196	15.8311	18.077	13.3435	10.5813	9.35252	18.8544	18.3895	15.8489	19.1311	14.513	18.8112	15.1037	15.709	16.0675	14.4044	16.4708	18.0531	28.29	22.2121	12.7297	17.5071	19.256	16.8427	14.9565	16.9572	11.7916	20.8012	18.2015
17p13.3	NM_021947	63826	SRR	serine racemase	0.836354	-0.257814	0.0244857	0.30088	1.9546	1.73159	1.83895	2.34462	2.7715	1.84583	2.08335	1.73951	1.78238	2.25771	2.31256	1.93132	2.73866	2.05598	2.54741	3.10443	3.97127	3.42835	3.40252	3.2273	3.35324	2.59316	2.9764	2.36519	2.10004	3.83644	2.93614	2.00865	1.96921	2.0176	1.16152	1.00224	2.05698	2.66413	2.7103	2.36881	3.22473	3.76063	3.2559	2.72983	2.30575
2q31.1	NM_020675	57405	SPC25	SPC25, NDC80 kinetochore complex component	0.850991	-0.232784	0.0245725	0.30088	5.30281	4.7608	4.44846	4.15221	3.18897	4.21633	3.47942	3.0772	2.83231	3.83676	3.58842	3.36153	4.09795	4.91162	3.83613	5.92634	7.32036	6.85412	3.95778	4.39056	3.84211	3.91806	4.58474	4.08695	8.13655	5.21796	5.76187	3.61615	4.26064	4.7333	2.67842	3.20092	3.47637	3.57033	4.2299	4.1861	6.4144	3.51898	4.97847	2.7388	4.42874
13q32.1	NM_005845	10257	ABCC4	ATP-binding cassette, sub-family C (CFTR/MRP), member 4	1.28733	0.364387	0.0245929	0.30088	3.95519	2.54043	3.18221	2.19589	1.7076	2.23496	4.63034	3.73646	3.97126	1.45974	2.21583	1.69863	3.55067	3.69951	2.68186	2.54176	1.99243	3.71237	1.6626	1.75683	1.41327	2.41287	2.47398	2.37792	0.733368	0.692439	1.07255	1.90309	1.50211	1.99192	0.361379	0.355536	1.17501	2.34192	3.21281	2.3659	2.98779	2.80843	2.90856	1.61953	1.76588
9p13.1	NM_001007563	347252	IGFBPL1	insulin-like growth factor binding protein-like 1	0.860439	-0.216855	0.0246051	0.30088	57.5239	47.0419	42.2366	69.3897	62.7026	85.6244	37.35	30.1049	34.1289	9.6783	15.8201	18.9064	57.7064	65.8747	70.453	57.6224	156.17	46.2678	48.7404	42.4991	43.1692	38.2715	32.8586	35.9942	46.7931	62.3843	54.8997	68.1556	61.9771	64.3705	14.7935	14.4551	20.0393	36.8177	52.6921	39.8234	37.9047	48.0902	53.4746	33.5966	31.3939
19p13.11	NM_002866	5864	RAB3A	RAB3A, member RAS oncogene family	0.719338	-0.475257	0.0246085	0.30088	40.2728	45.3236	32.4562	35.2116	28.957	29.5676	14.7225	10.3652	11.1109	1.75467	2.45138	2.68299	22.4425	24.3231	33.6868	11.3942	19.425	9.23952	45.1259	45.2617	50.4595	14.4269	10.6621	12.7485	26.9924	26.9564	25.2629	12.4321	14.2885	18.6791	22.3667	19.8215	11.7234	16.7959	21.3345	20.3423	16.5768	27.0074	20.8673	17.7479	24.4346
17q11.2	NM_018428	55813	UTP6	UTP6, small subunit (SSU) processome component, homolog (yeast)	1.17626	0.234211	0.024609	0.30088	12.666	10.2857	14.4255	9.57677	12.9897	9.9018	11.4737	11.0819	11.394	13.6253	17.9402	13.0923	16.9245	15.9387	12.3308	17.7425	16.5582	18.6468	9.23574	8.47561	9.93815	9.13701	9.92266	9.6026	5.53383	3.32751	7.14102	13.0212	11.4593	11.6842	2.5497	2.91758	4.29421	10.7171	11.4576	10.2689	11.9421	9.47662	12.7198	8.47505	7.94302
8p11.21	NM_005662	7419	VDAC3	voltage-dependent anion channel 3	1.11477	0.156751	0.0246426	0.30088	13.4225	13.5321	15.0302	18.3783	27.0314	16.2512	24.3632	27.1925	22.7916	22.4267	28.6707	24.4554	19.9189	17.6687	12.5135	24.3846	22.6782	29.0056	8.5362	9.88057	12.3351	16.1105	18.1645	15.1625	7.73157	8.11896	8.48189	24.0185	21.2931	25.8909	8.76039	7.55112	13.2844	15.3541	13.722	14.8345	26.6133	18.76	22.126	24.6115	15.394
2q23.2	NM_015702	27249	MMADHC	methylmalonic aciduria (cobalamin deficiency) cblD type, with homocystinuria	1.09184	0.126766	0.0246532	0.30088	34.6759	25.9813	36.981	36.4198	44.986	43.431	36.5585	37.0187	40.7784	46.319	50.3787	45.5986	42.8009	47.723	39.9576	33.7649	41.6	40.1104	36.8632	34.9867	26.9564	29.977	30.2581	32.4329	12.0634	14.4685	17.6695	41.2716	35.385	36.6313	12.4375	12.1135	30.9806	33.0551	35.9676	29.6725	43.263	34.8968	41.6355	37.5342	24.2105
4q31.3	NM_006439	10586	MAB21L2	mab-21-like 2 (C. elegans)	0.777246	-0.363557	0.0246663	0.30088	3.51003	3.32819	3.29316	25.3277	29.7025	35.2117	10.7327	16.1725	12.1807	19.7758	20.0127	17.9225	8.99369	10.935	6.59119	23.7424	9.17912	14.0817	25.878	31.0857	28.3092	38.8824	32.3158	37.4478	16.8077	17.3949	16.8605	16.3889	12.5971	15.7982	12.7308	14.3775	17.6741	18.4669	20.2314	17.359	33.7293	41.5386	32.561	14.9088	15.5688
5q31.2	NM_004134	3313	HSPA9	heat shock 70kDa protein 9 (mortalin)	1.08414	0.116546	0.0247878	0.301993	65.9449	52.3192	63.2478	52.6964	65.9161	53.4805	67.4177	68.3937	63.1825	61.3543	75.2339	60.9077	62.8767	64.6263	50.4309	67.9845	62.5275	74.8183	46.693	43.8429	47.5711	57.4503	52.444	62.3775	27.8055	19.4204	36.6065	59.9957	55.7105	57.0233	16.2638	17.2294	21.5934	51.9605	56.3256	49.5106	71.7754	51.1833	71.467	53.3902	51.8989
14q21.2	NM_015091	23116	FAM179B	family with sequence similarity 179, member B	1.17907	0.237645	0.0248424	0.30216	6.48563	4.93545	5.22516	3.97234	4.85278	4.02755	5.17733	5.40489	4.34208	6.453	7.86748	5.99966	4.51408	4.49242	3.7844	6.99787	5.64038	6.61868	3.58516	3.3756	3.88881	4.9034	5.74614	4.93642	3.83889	3.02735	4.93956	6.31446	5.16686	5.28032	1.48953	1.19244	1.75729	3.67189	4.37099	3.96956	5.48749	4.99608	6.10353	5.82346	5.91023
6q23.3	NM_006620	10767	HBS1L	HBS1-like (S. cerevisiae)	1.18979	0.250706	0.024862	0.30216	5.27078	3.87952	4.54093	3.56868	4.75627	4.18991	4.76732	4.59848	4.67541	5.12442	6.26211	5.10425	5.02925	4.4921	2.90902	5.82399	4.67373	5.97892	4.26968	4.66847	5.10557	4.07095	3.87759	4.47317	2.41868	1.94399	3.51018	5.4304	4.84081	5.11241	1.44528	1.33789	1.33577	3.82243	4.00046	3.47114	5.2561	4.13854	6.09472	3.68908	3.64987
4p15.2	NM_018323	55300	PI4K2B	phosphatidylinositol 4-kinase type 2 beta	1.25093	0.323005	0.0249314	0.302271	1.21194	1.05175	1.07901	1.6992	2.65235	2.84373	3.03808	2.81283	2.65364	5.01769	5.91886	4.69512	3.04527	2.55566	1.67759	2.72207	2.54172	2.98273	1.23287	1.1118	1.11464	1.90626	2.15948	2.24518	1.56571	1.37342	1.68776	2.99039	2.75182	2.28983	0.953851	0.981923	2.80708	2.60287	1.91684	2.19913	3.95742	2.34965	2.80258	1.97575	1.01422
1q22	NM_007221	11243	PMF1	polyamine-modulated factor 1	1.15123	0.203181	0.0249461	0.302271	12.1839	10.2224	16.8354	21.6636	20.7684	18.5642	17.7625	20.6704	22.4123	17.1507	15.5201	16.5086	15.4698	18.7455	14.198	10.3624	29.9734	15.952	10.6007	9.71086	9.09038	10.1786	6.53219	7.82727	12.9592	12.897	11.522	13.5696	19.0914	18.7108	16.0165	14.9149	5.44213	17.7685	14.2358	14.6981	17.8439	15.0725	14.9836	7.46103	6.11147
3q29	NM_005929	4241	MFI2	antigen p97 (melanoma associated) identified by monoclonal antibodies 133.2 and 96.5	1.36255	0.44631	0.024972	0.302271	0.441375	0.415405	0.302682	1.34207	1.37204	1.70402	2.26196	2.65558	3.20411	5.15904	3.60544	5.01876	1.41103	1.49267	1.42671	0.986781	0.953057	1.27827	0.063974	0.138783	0.090534	1.89292	1.49901	2.41052	0.916177	0.396207	0.512662	2.06585	2.66712	2.86191	1.007	1.1904	0.633905	3.13056	1.90447	2.17968	3.10384	2.02271	1.5628	1.09823	0.513598
7q22.1	NM_032959	246721	POLR2J2	polymerase (RNA) II (DNA directed) polypeptide J2	0.816273	-0.292876	0.0250096	0.302271	8.39086	8.156	9.46087	14.7081	14.1039	12.6978	7.38941	8.18088	8.36339	5.635	4.61872	5.23207	9.37023	10.2187	8.71323	6.14863	6.44352	5.5185	16.866	18.0189	17.558	10.9267	9.80889	9.91926	12.3502	13.6044	11.1259	11.8514	13.2047	14.4906	20.9647	21.4183	14.337	19.9076	21.809	19.5847	9.54323	9.33729	5.72574	6.82308	8.46611
17q25.3	NM_019020	125058	TBC1D16	TBC1 domain family, member 16	0.914524	-0.128908	0.0250668	0.302271	10.3836	11.8232	8.779	12.931	10.85	11.1856	12.1098	11.4977	12.3667	7.73369	7.79394	9.4752	11.7943	12.2185	12.7795	9.2439	11.5381	8.23386	14.6408	14.4531	17.0898	11.7456	10.3086	12.1781	11.6113	10.0407	8.28384	11.3365	12.1158	13.99	16.0665	15.2404	9.7361	13.0962	14.136	13.6711	12.7708	11.3968	10.0394	9.02759	10.0927
Xq23	NM_022977	2182	ACSL4	acyl-CoA synthetase long-chain family member 4	0.695784	-0.523288	0.0250844	0.302271	8.17726	4.82701	4.3861	4.14819	5.90999	3.53176	3.28993	2.27589	2.60619	0.533113	0.465625	1.54543	5.24277	6.19337	4.81741	3.57078	3.84208	2.59265	13.1551	14.2405	14.2748	5.03024	4.90688	5.68857	4.79183	5.2258	6.84344	2.64134	2.7462	2.65492	1.27155	1.34931	2.78692	3.10184	2.58735	3.36068	4.36561	3.9146	5.9822	4.8935	6.84673
17q25.1	NM_052916	114804	RNF157	ring finger protein 157	0.803981	-0.314766	0.0250848	0.302271	9.37089	9.58539	6.74599	11.1491	10.4708	10.0493	7.35149	6.56035	6.97607	2.58535	2.6382	2.95867	6.86362	8.32012	8.20486	6.76586	7.90713	5.99843	18.981	20.1222	20.6834	10.6965	8.26854	9.57566	9.47057	7.9668	7.72612	5.14164	4.64341	5.81539	9.13024	7.96158	7.82647	9.45283	11.0941	9.35481	7.25071	9.2475	7.35038	7.96935	10.9518
6p12.1	NM_033480	26268	FBXO9	F-box protein 9	1.14426	0.194415	0.0251199	0.302271	1.96954	2.26221	1.93757	3.75762	4.00382	3.83051	3.32664	4.26548	4.22676	3.85895	4.01504	5.00465	2.51918	3.15948	2.04073	3.22578	3.88969	3.94773	4.05083	3.94396	3.55216	2.81874	3.20025	3.6123	2.42442	2.08589	2.47491	4.06982	3.49769	3.75312	1.30435	1.6026	2.50293	3.45486	3.57046	2.68471	4.3365	3.47363	3.50546	2.91942	2.45524
20p12.3	NM_015939	51605	TRMT6	tRNA methyltransferase 6 homolog (S. cerevisiae)	1.29998	0.378486	0.0251438	0.302271	3.79444	2.60747	3.23337	4.1215	6.18371	4.63977	3.47503	4.14735	3.92484	4.92859	6.07883	4.67564	8.46015	7.37213	5.16113	5.37762	3.99256	5.04112	4.45283	4.03303	4.52783	3.14404	2.75275	3.05715	1.36637	0.577767	2.92011	4.35077	3.87527	3.20971	1.13525	0.963314	1.02962	3.61614	3.35467	2.93907	5.07362	2.63202	4.40976	2.6103	2.44071
17p13.1	NR_002912	26781	SNORA67	small nucleolar RNA, H/ACA box 67	1.0706	0.0984186	0.0252245	0.302876	149.989	485.727	334.931	178.609	251.007	240.618	264.791	230.504	238.983	187.682	144.482	141.987	245.802	373.249	216.962	58.2039	372.54	98.2547	88.9802	99.8929	131.589	172.648	165.803	101.166	201.876	105.279	163.546	209.358	276.811	196.78	165.795	131.356	122.719	95.2847	61.6948	137.446	202.832	106.387	201.002	85.2415	83.6135
11q21	NR_002569	619383	SCARNA9	small Cajal body-specific RNA 9	0.925069	-0.112367	0.0253079	0.303113	182.933	118.695	96.1965	94.755	70.5659	87.8293	60.2533	48.5282	89.8313	69.2658	50.549	73.2091	109.855	96.7617	122.225	107.707	100.156	127.086	109.949	144.884	125.381	107.283	135.754	144.436	123.988	76.5868	100.157	122.189	137.467	123.915	87.4342	69.5318	121.252	103.957	111.565	116.742	69.7205	40.3994	82.2442	56.035	74.4432
5q35.3	NM_001172638	643836	ZFP62	ZFP62 zinc finger protein	1.28693	0.363937	0.0253327	0.303113	3.97761	5.63274	4.75124	3.4571	4.28536	3.53376	6.01073	4.60997	5.21934	5.67565	6.62472	4.80483	2.56798	2.84912	2.57191	4.98772	3.13422	6.50638	0.782448	2.94369	4.13556	2.74921	6.45815	4.42661	3.41719	2.73456	6.26709	5.42629	3.78507	4.58572	0.317999	2.13522	2.04962	5.17516	2.45662	4.53583	4.89662	2.85354	4.94993	4.02943	3.68595
2q11.2	NM_015348	23505	TMEM131	transmembrane protein 131	1.10111	0.138955	0.0253354	0.303113	7.3712	6.25595	5.04085	6.28805	6.16484	6.85292	7.51499	7.238	7.14034	8.55756	10.2348	8.17834	6.91124	7.01723	5.84943	7.7244	5.20419	7.88826	6.44721	6.33446	7.07008	5.99588	6.08172	6.14288	5.9259	5.69081	6.62637	6.47167	5.6497	6.54199	2.98767	2.83522	6.27746	6.60648	6.99651	6.9044	8.81918	7.61793	8.87641	5.28765	5.2518
4q21.1	NM_003715	8615	USO1	USO1 vesicle transport factor	1.14192	0.191456	0.0253758	0.30317	13.8962	9.62623	11.433	12.6988	17.3606	15.1594	22.4968	21.7525	21.0704	30.7112	40.2214	30.2188	17.7737	14.3568	9.68092	26.4604	15.9414	26.0025	8.60452	8.28524	9.45443	16.9316	18.1824	17.9582	8.61295	6.97881	12.0586	25.7556	21.2742	20.9107	5.86029	6.55736	7.67043	19.0065	17.6378	16.132	22.9856	18.2806	24.0087	14.3007	12.7989
2p13.3	NM_002056	2673	GFPT1	glutamine--fructose-6-phosphate transaminase 1	1.08635	0.119483	0.0254235	0.30317	15.5	11.342	12.0268	13.4852	15.5148	14.3525	13.1177	14.0786	13.1813	19.9027	23.0757	17.8259	13.9542	15.413	12.2128	13.2875	16.4952	18.7464	11.7238	12.0686	11.245	11.6099	13.6035	13.7624	8.51834	8.54962	12.0574	15.569	13.5758	13.4899	5.83863	5.30892	10.6403	16.5358	17.8765	17.0988	17.3284	15.4765	19.8996	10.6226	11.2078
4p15.33	NM_001017979	9364	RAB28	RAB28, member RAS oncogene family	0.899931	-0.152114	0.0254313	0.30317	6.85947	5.38926	4.399	7.23007	7.4451	6.6563	7.96814	7.4751	4.74086	6.12848	7.02644	6.67287	4.43228	8.04638	5.22129	7.85064	11.2555	8.07026	7.80107	7.96657	7.06485	7.92501	6.7977	8.48803	6.53983	8.81992	10.1301	7.11582	6.00759	5.65292	4.42268	4.70107	7.89682	7.27086	7.92491	7.1801	7.9025	6.86442	8.94107	8.50627	6.63037
9q32	NM_015258	23307	FKBP15	FK506 binding protein 15, 133kDa	1.11318	0.154681	0.0254982	0.303533	4.48077	4.64908	3.82049	4.10876	4.6872	4.29378	5.98728	4.86193	5.43577	8.03472	7.97458	6.93745	3.96733	4.85088	3.926	6.70126	5.77705	7.06104	4.90201	5.24343	5.17513	5.1252	5.14987	4.99683	4.54336	3.0381	4.29896	5.66376	4.65964	4.95827	3.15966	2.41072	4.94956	4.92021	4.97951	5.08811	4.89879	4.02448	4.63608	4.06252	4.72245
3q21.1	NM_017554	54625	PARP14	poly (ADP-ribose) polymerase family, member 14	1.35799	0.441476	0.0255435	0.303533	1.29959	0.832751	0.783823	1.95267	2.5678	2.7718	4.69184	3.81893	3.65388	6.31788	6.80099	5.32571	2.06317	2.2364	1.31873	4.01424	1.34522	2.89912	0.547499	0.556191	0.605853	5.09633	5.16172	5.48863	1.91128	1.26923	1.52142	3.10395	2.5997	2.2872	1.11501	0.923591	1.49364	2.7937	3.09905	2.91435	3.10376	2.42784	2.39908	2.23042	2.32671
Xq13.1	NM_018977	54413	NLGN3	neuroligin 3	0.750494	-0.414087	0.0255991	0.303533	3.55355	2.49854	1.4305	3.78223	3.43659	3.30497	2.64317	1.54546	4.83198	0.990928	1.10486	0.401809	2.42548	1.78394	1.93623	2.50986	2.37753	2.97747	6.06976	8.82343	8.86437	1.13706	1.18984	2.91758	5.31492	4.90907	4.70978	2.82203	2.08285	4.20366	6.04794	4.58825	2.52813	2.89482	3.35224	2.38696	3.52628	4.06831	3.16023	3.58016	3.51243
16p13.13	NM_003498	8303	SNN	stannin	0.841511	-0.248946	0.0256146	0.303533	27.3715	30.6401	29.8875	29.5384	30.5186	26.463	16.5553	14.8614	16.0597	7.22243	8.27549	8.22716	27.8635	25.229	29.4223	13.5769	24.4117	12.3633	51.1435	50.6295	53.4893	18.9981	17.5182	16.1406	28.4012	36.4977	25.22	18.1099	18.1929	22.027	27.4893	29.0939	17.2246	17.4876	18.5928	16.3652	17.8932	21.2039	18.2885	20.1085	21.5205
2q14.1	NM_006773	8886	DDX18	DEAD (Asp-Glu-Ala-Asp) box polypeptide 18	1.14277	0.192541	0.0256584	0.303533	15.9265	11.591	15.6975	12.3037	16.8136	14.1409	11.3636	10.9042	10.5575	10.7401	13.9625	9.96241	17.543	17.0176	12.1233	15.0296	19.0127	18.4949	10.3142	9.90447	10.7075	9.53804	9.62289	9.21143	7.90635	5.10596	10.1218	11.4162	10.1491	11.8017	3.80574	3.82723	3.80466	10.6137	10.4314	9.32306	12.3954	10.8243	15.1206	8.34668	8.49242
4q12	NM_139211	84525	HOPX	HOP homeobox	1.46972	0.555545	0.0256673	0.303533	9.73023	4.51153	14.1334	4.73691	2.96822	4.66783	3.79333	3.00411	4.25357	1.1206	1.64369	1.59547	4.24109	3.9612	2.71094	0.694468	1.50724	1.60812	2.90751	2.08117	1.39009	5.03846	4.87545	4.85406	1.1551	2.33839	1.44253	1.06761	0.953197	0.887818	3.60482	3.13905	1.63219	4.40365	4.31621	4.73898	2.3224	3.06085	2.73945	2.72756	2.13746
19p13.11	NM_021047	56242	ZNF253	zinc finger protein 253	0.833307	-0.26308	0.0256747	0.303533	6.57554	5.45776	5.79766	7.60879	8.09851	8.238	7.22566	5.32618	6.12066	2.53225	2.9599	2.5135	6.93945	7.24054	6.5843	10.4024	7.81224	10.1756	8.82829	7.05431	7.26615	5.45555	6.44211	6.41025	4.82576	5.84597	8.32743	8.15887	6.39266	7.54027	2.29995	3.43874	7.4534	6.14569	6.80941	6.57391	6.75272	8.70036	9.83213	6.54519	4.9631
22q13.31	NM_022766	64781	CERK	ceramide kinase	0.922735	-0.116012	0.0258092	0.303946	12.9814	13.1473	9.74179	22.0132	19.388	22.6254	21.8153	22.581	23.4387	18.332	20.3431	20.5714	17.5324	22.2814	19.7149	23.4035	20.9797	20.0373	19.5436	18.9042	18.7986	36.768	32.7866	36.0647	18.6847	17.4169	16.1973	20.9567	20.5645	18.0805	17.8476	16.7746	20.2111	22.4074	23.8417	17.4956	19.2045	17.7894	15.7404	21.8701	20.5683
5q22.1	NM_001744	814	CAMK4	calcium/calmodulin-dependent protein kinase IV	0.762484	-0.39122	0.0258243	0.303946	4.08435	2.46489	2.01414	1.98613	1.63379	1.80169	2.42839	1.70401	1.72807	0.534136	0.704486	0.370708	2.94274	3.32058	3.26383	1.8334	3.15808	2.45492	7.43274	6.80682	5.95478	2.19049	2.32439	1.58035	2.89483	2.03096	3.63514	2.66469	2.38993	2.19284	0.94626	1.01434	4.30223	2.08149	2.42989	2.09207	1.62061	2.26198	1.81229	3.07134	2.72007
7q36.3	NM_020728	57488	ESYT2	extended synaptotagmin-like protein 2	1.11032	0.150974	0.0258603	0.303946	6.37502	5.93875	5.3925	7.67285	8.40247	9.46194	10.9223	11.5728	11.9866	14.1502	15.1011	13.4613	6.67109	8.7494	6.6723	8.54397	10.4761	8.6807	7.87837	7.63071	6.92264	8.33843	9.14776	9.09745	7.16267	6.74978	6.91821	11.1532	8.57555	8.60616	4.03147	3.53449	10.1188	7.73077	8.32821	6.93773	10.8421	8.05646	9.37001	10.2098	8.13459
4q21.22	NM_031370	3184	HNRNPD	heterogeneous nuclear ribonucleoprotein D (AU-rich element RNA binding protein 1, 37kDa)	1.24423	0.315251	0.0260171	0.303946	7.12859	5.36984	3.58156	7.80256	7.15622	8.37933	8.37873	8.21091	7.59495	7.06647	7.44408	6.84669	7.29099	6.34876	5.40157	6.04268	11.1791	10.1331	4.50035	5.93933	5.99939	4.08722	3.08283	3.44155	5.28646	4.57005	5.04143	5.22909	9.11594	6.53287	1.52343	5.10597	2.44896	6.94495	4.96863	6.4939	8.31004	9.1995	9.59011	3.50685	3.4704
5q15	NM_014639	9652	TTC37	tetratricopeptide repeat domain 37	1.14106	0.190379	0.0260684	0.303946	8.61923	7.14759	7.44403	9.89813	12.6569	10.5596	13.9834	14.0704	13.0985	16.329	21.1815	16.9693	10.8226	8.99765	6.23354	14.3733	14.3036	18.4386	9.28709	9.55561	10.0402	8.01924	9.71839	9.24114	9.36327	5.08246	10.1866	14.5246	13.3816	13.0677	4.31016	4.33072	5.51646	10.1742	9.93613	8.66447	15.116	12.7119	15.7489	8.623	8.02873
9q21.12	NM_001163	320	APBA1	amyloid beta (A4) precursor protein-binding, family A, member 1	0.750325	-0.414413	0.026081	0.303946	5.51504	5.66682	2.60206	4.65286	3.68333	4.2328	2.14124	1.8342	1.81157	0.987707	0.770809	0.905333	3.03301	3.78881	4.21944	1.19454	2.74128	2.32032	12.0681	12.6944	14.6352	4.72826	3.60119	3.68674	4.83402	4.57049	4.73147	2.7209	2.86402	3.47565	3.43363	3.10195	3.59804	3.07371	4.1961	3.23807	2.85997	3.85428	3.24307	2.9769	4.00734
8p23.3	NM_183420	26260	FBXO25	F-box protein 25	1.30933	0.388829	0.0260942	0.303946	2.01023	2.51207	3.33404	3.06731	2.83547	1.47297	4.38586	4.17668	3.44213	4.71391	5.87915	5.94153	3.19905	3.4042	0.854493	3.26355	2.97203	3.22634	0.968594	1.50108	1.19416	3.0333	2.4187	3.15314	1.67376	2.27328	1.75042	3.59584	3.18817	3.87092	1.61576	2.09796	1.83582	4.50233	2.70361	0.976024	3.25434	4.20675	4.49219	1.07297	1.86254
6q23.2	NM_015529	26002	MOXD1	monooxygenase, DBH-like 1	0.722145	-0.46964	0.0261108	0.303946	1.46194	1.36682	1.88045	4.90768	7.34543	5.9646	2.1243	4.26275	2.63031	1.99268	2.06509	2.22668	1.60969	2.28382	0.834832	7.29926	12.0335	10.9939	2.29393	2.29944	1.87294	3.87345	2.7284	3.49435	4.69371	4.26267	4.38704	6.94826	5.06132	5.30223	5.4096	4.31362	10.1014	5.53158	3.92387	3.62524	6.15784	5.45195	5.2257	3.05286	3.02146
6q21	NM_007214	11231	SEC63	SEC63 homolog (S. cerevisiae)	1.13799	0.186488	0.0261628	0.303946	8.48246	6.83209	6.15188	7.39785	7.6231	7.13579	7.74299	7.02661	6.74966	9.72934	13.7715	9.31935	7.69462	6.53044	6.06053	6.32661	9.36086	12.5987	4.66061	6.3585	7.08883	7.15372	6.11212	6.29873	5.61084	4.53291	6.14539	7.36571	8.66913	8.73781	3.45841	3.02086	3.85898	7.79006	7.38811	7.80479	10.0592	8.58727	11.6554	4.68381	5.16936
3q13.33	NM_005694	10063	COX17	COX17 cytochrome c oxidase copper chaperone	0.945045	-0.0815457	0.0261794	0.303946	30.7661	27.2133	32.021	36.8711	36.8087	38.4025	37.5946	44.7079	41.1701	30.192	45.5831	41.7195	38.3085	44.3399	31.4943	40.1762	27.6714	32.8244	38.9562	33.329	27.6706	54.0996	43.6536	54.2132	25.0492	33.0325	27.0252	40.8566	38.953	42.0605	33.8871	37.4336	41.0512	44.5588	40.9296	38.9943	41.48	41.1639	43.8813	53.2377	43.3761
8p21.2	NM_022659	64641	EBF2	early B-cell factor 2	1.39023	0.475324	0.0261868	0.303946	4.17565	2.84949	2.74401	2.63242	2.00346	2.93492	3.99207	2.06622	2.77337	0.652412	1.1582	0.808175	2.89748	2.1884	1.72272	1.47879	1.16477	1.81615	3.3061	2.99518	2.86978	0.468853	0.427402	0.31803	1.91802	2.45511	2.49029	1.22967	0.917551	1.00289	1.15633	1.27002	2.56897	2.20647	2.29097	1.9802	2.10404	2.01486	2.96683	0.628686	0.58343
14q32.33	NM_005552	3831	KLC1	kinesin light chain 1	0.810304	-0.303465	0.026188	0.303946	48.5297	36.305	29.2668	35.1162	41.4768	38.6506	26.9077	20.1831	20.0738	5.73347	9.65825	7.11699	28.6234	33.1099	31.2208	28.6146	47.0581	27.2044	81.5005	78.3093	82.2158	26.8539	25.7338	21.8167	30.2293	30.6011	39.5813	35.6113	30.0783	32.7876	7.66785	9.76794	15.3695	20.7156	25.0718	21.5801	29.0246	34.1835	39.6641	27.6936	28.8615
7q22.1	NM_014377	27000	DNAJC2	DnaJ (Hsp40) homolog, subfamily C, member 2	1.25698	0.329966	0.0261912	0.303946	6.17604	5.2557	4.6254	3.69256	5.43092	5.42431	4.62731	5.73394	5.15994	5.09814	6.72506	5.06265	6.10026	5.91865	4.64022	7.86244	7.65857	9.78037	3.06162	4.15899	4.93657	3.90351	3.97242	4.5551	2.87925	1.8778	2.73265	7.01113	5.76004	5.95787	0.818034	1.44009	0.805494	4.81843	5.03231	4.2433	5.38171	3.95605	6.05813	3.01625	3.37123
11q13.4	NM_001256802	6188	RPS3	ribosomal protein S3	1.0423	0.0597766	0.0262118	0.303946	191.774	189.396	190.875	228.474	242.308	275.47	261.529	290.909	291.097	350.25	277.248	340.712	196.169	326.152	285.113	323.517	248.744	249.697	153.334	138.749	147.967	309.683	267.526	270.608	161.312	198.196	150.265	295.571	272.572	246.379	91.3577	139.141	156.157	209.443	225.629	166.503	262.514	168.948	185.083	166.154	128.13
12q13.2	NM_005811	10220	GDF11	growth differentiation factor 11	0.829633	-0.269454	0.0262714	0.303946	4.16705	4.8315	2.39849	7.93762	5.89473	6.58861	10.2422	10.304	10.8452	5.79074	6.92689	6.25019	3.65387	3.97052	3.68172	9.08312	6.98563	6.03316	7.94865	7.96812	10.2543	13.7579	12.8269	13.7924	7.29107	7.11405	4.86513	6.97878	6.96953	7.4382	16.1231	12.4143	11.9987	9.01581	9.94921	8.30429	8.31875	8.54104	6.54596	9.99962	10.8065
2p13.1	NM_001287491	200424	TET3	tet methylcytosine dioxygenase 3	0.900922	-0.150526	0.0262777	0.303946	5.54925	5.74156	3.28486	5.66192	4.94893	5.2671	4.30431	3.44027	3.45228	4.15457	4.02305	3.53044	4.17457	4.62478	4.64685	4.89457	5.45988	4.08709	6.1353	6.58922	6.42948	5.44729	5.2481	5.44435	5.18129	3.5411	4.60511	4.69136	4.60248	5.51343	4.14585	4.51008	3.83049	4.54433	4.9192	5.69202	5.10887	5.33309	6.01656	3.65327	4.79705
11q25	NM_018644	27087	B3GAT1	beta-1,3-glucuronyltransferase 1 (glucuronosyltransferase P)	0.652465	-0.616027	0.0262943	0.303946	20.2329	18.2616	14.2695	7.38346	6.89469	5.22029	5.27872	3.57961	4.05425	0.071423	0.721078	0.611023	19.6345	18.4114	24.3034	3.86295	5.31529	3.26092	10.2248	9.79887	13.2059	4.85498	2.67526	3.28818	7.63263	7.1025	6.0396	7.17972	9.01028	12.9885	10.626	10.8461	5.2797	6.64971	11.5207	8.99779	3.60799	6.87404	7.04299	3.28533	8.77806
2q33.1	NM_001136039	60491	NIF3L1	NIF3 NGG1 interacting factor 3-like 1 (S. cerevisiae)	0.777524	-0.36304	0.026301	0.303946	2.19432	3.06177	3.25863	3.42591	1.01957	1.67169	1.43112	3.63439	4.03537	3.16956	1.89617	3.68703	4.06383	2.38859	2.36323	3.37101	7.04905	4.73159	5.74088	5.44374	6.33613	2.95306	2.11905	1.62179	2.93293	3.20447	4.3434	3.06157	4.79534	4.54978	1.56584	2.84981	3.76351	6.25328	2.29839	3.33534	1.92953	2.6516	4.58085	3.36243	1.97863
16q22.1	NM_030819	81577	GFOD2	glucose-fructose oxidoreductase domain containing 2	0.808347	-0.306954	0.0263093	0.303946	12.365	11.5472	12.766	9.62263	9.64645	10.6542	7.45969	8.61012	7.84792	3.27994	3.87257	4.95357	7.30924	8.46635	9.55345	4.08984	8.39363	5.52362	19.2251	19.6324	20.7131	7.45731	6.12986	6.65935	10.7753	11.4154	10.0777	9.30468	11.0699	11.4445	19.2883	16.9127	9.15279	10.3172	10.9698	9.96813	10.2082	12.1603	9.19573	10.907	12.0171
2p16.3	NM_000179	2956	MSH6	mutS homolog 6	1.14723	0.19816	0.026355	0.303946	20.1512	17.02	16.3087	16.0294	15.8475	17.5503	16.2554	18.558	18.5702	21.8927	26.6287	23.6598	22.6038	23.0551	14.8791	27.6861	22.0631	28.1323	10.4673	10.8441	12.8648	18.3331	17.1371	18.3961	10.2489	5.62127	9.00217	18.2009	17.4966	17.6539	5.27101	4.89126	6.30485	16.1531	16.143	15.3893	21.8947	15.6223	23.4611	12.2995	11.5172
16p13.3	NM_007108	6923	TCEB2	transcription elongation factor B (SIII), polypeptide 2 (18kDa, elongin B)	0.958224	-0.0615656	0.0263767	0.303946	79.5884	73.5948	104.083	95.6841	99.0736	78.1162	80.9051	98.6717	92.7607	64.6605	78.7183	77.3785	88.8105	86.5477	78.3648	70.1655	80.8173	75.8739	89.5202	77.8256	82.8459	63.8382	56.8132	69.0097	68.3012	96.069	68.6149	81.8237	90.7572	112.46	161.153	136.872	55.5588	102.128	93.4523	102.183	114.57	126.639	77.9334	95.8028	93.1966
2q11.2	NM_004804	9391	CIAO1	cytosolic iron-sulfur protein assembly 1	0.954195	-0.0676445	0.0264229	0.303946	13.0057	10.8585	11.5317	14.9638	14.9231	15.1941	14.132	14.7121	15.5988	13.9633	14.5113	14.498	14.9078	17.7656	17.6161	13.4858	15.4421	14.6978	17.7805	17.2149	17.0427	13.8586	13.8805	15.5124	11.4365	14.023	12.154	14.2049	12.7049	14.0975	11.7368	10.1164	15.7048	13.7604	13.6076	12.6075	14.3763	14.8937	13.5414	15.8136	14.3438
19p13.3	NM_017572	2872	MKNK2	MAP kinase interacting serine/threonine kinase 2	0.815372	-0.294469	0.0264265	0.303946	6.61059	7.6442	7.31177	8.13772	10.9492	9.06842	11.1753	13.451	12.719	16.7622	18.4044	18.328	16.3835	16.1338	14.3806	22.7096	11.9004	10.0666	5.11146	5.53434	6.42969	35.814	29.8725	37.6305	9.13953	8.4702	9.84846	13.0723	11.9482	15.4857	25.9005	22.5365	15.5682	15.3024	17.5922	18.0588	15.6462	14.3408	11.5341	24.5036	21.4081
16p13.13	NM_001424	2013	EMP2	epithelial membrane protein 2	1.25384	0.326358	0.0264407	0.303946	3.71597	3.38213	2.69922	4.59389	6.69327	7.98292	5.3312	7.40312	6.14381	13.1443	12.1672	11.8382	7.41041	8.02718	5.11574	6.22295	4.99925	5.09439	1.56272	1.32867	1.09141	6.04986	5.57062	6.56384	3.8198	3.00606	3.14339	9.47183	8.58695	7.47284	2.78484	2.46092	4.39849	7.48087	6.97265	6.20257	11.9435	6.34813	7.44817	4.57263	3.04288
7q22.3	NM_001244262	26959	HBP1	HMG-box transcription factor 1	1.17024	0.226806	0.0264724	0.30396	12.2981	11.1014	14.5158	9.41692	9.98075	8.86993	14.3594	15.0515	16.63	21.3647	25.7704	18.75	7.9784	7.64502	6.23221	15.851	15.0556	18.3871	5.08287	6.31029	4.45629	12.699	15.5432	18.0557	7.02845	8.23843	11.8305	17.0613	15.5654	15.9096	4.4048	4.99878	11.0141	14.8063	10.8657	13.9202	16.5177	13.05	15.5599	13.7287	9.02981
3p21.31	NM_001407	1951	CELSR3	cadherin, EGF LAG seven-pass G-type receptor 3	0.715984	-0.482	0.0266488	0.304114	6.98816	9.20546	6.34302	8.49962	6.42455	7.36927	3.8008	2.89346	3.49329	0.975573	1.03809	1.00318	5.89114	5.8275	7.40402	2.47552	5.71718	2.50845	9.58623	10.3389	11.3534	3.43898	3.05909	2.82136	10.9869	8.93816	7.68501	4.47147	5.25872	6.94529	8.18256	8.39281	4.08023	5.26243	6.52603	7.79087	4.50159	7.12414	4.57999	4.26284	7.65772
14q24.3	NM_014909	22846	VASH1	vasohibin 1	0.845745	-0.241705	0.0266644	0.304114	9.7856	11.0907	7.24178	8.39256	7.1937	7.58724	7.12646	6.23235	6.35055	2.88613	2.88365	3.50705	6.90246	7.49029	7.7559	5.36856	9.79849	7.84392	8.59402	8.39563	9.65013	8.30292	7.20398	7.54951	7.47142	5.92357	6.02753	6.8184	7.48315	9.64885	9.37179	8.4205	5.36359	9.39705	10.5706	10.1053	6.01225	7.39316	6.34767	5.87309	6.63708
19p13.11	NM_004838	9454	HOMER3	homer homolog 3 (Drosophila)	0.842093	-0.247948	0.0266777	0.304114	8.51485	9.11881	9.38424	11.2003	8.45088	8.04748	9.48977	11.2748	8.82072	7.29766	5.31702	7.7023	8.60904	6.8889	9.92007	7.55133	8.79	9.27208	8.76817	5.02259	8.70672	15.2882	14.2841	17.228	6.93715	6.98147	6.9943	9.62546	9.70446	13.297	22.3376	17.3249	8.44907	14.0148	13.7903	13.0367	9.91909	11.6358	7.52131	20.829	14.4859
8q22.3	NM_015420	25879	DCAF13	DDB1 and CUL4 associated factor 13	1.1346	0.182189	0.0267016	0.304114	15.5654	10.8172	15.652	9.54433	12.5096	9.96535	11.3315	11.958	12.4321	10.9117	13.2224	11.258	13.2346	14.5165	10.8452	13.8573	15.6189	16.1825	11.382	9.20094	8.20552	7.62679	10.6304	10.9733	6.74766	5.68787	8.48663	10.2201	10.5375	9.21544	2.56637	2.69468	5.63303	9.891	11.2818	8.97527	11.6992	9.40419	11.7414	10.2525	7.29101
2p11.2	NR_110236	101928371	AC104134.2	uncharacterized LOC101928371	1.22504	0.292825	0.0267913	0.304114	3.01638	3.18921	3.46196	3.05021	4.16663	3.61707	2.5033	2.842	2.34836	2.88343	4.33321	2.85082	2.92854	2.96896	2.08099	3.64297	3.38416	4.49665	3.71546	3.05006	3.31553	2.61182	3.78326	2.91014	2.6277	1.60511	2.65972	3.6634	2.47224	2.27374	0.785798	0.79778	1.38017	3.04459	2.48323	3.06273	3.12596	2.43351	3.56298	2.50023	1.80069
19q13.11	NM_002333	4037	LRP3	low density lipoprotein receptor-related protein 3	0.812519	-0.299527	0.0268001	0.304114	14.5179	14.7862	17.4715	17.3944	16.4383	15.4519	9.69966	11.4144	11.718	4.51046	3.75673	4.75553	14.955	15.6829	17.445	9.32726	11.0677	9.96578	24.2374	21.452	30.7573	9.91389	7.47731	9.10904	12.3788	15.6956	11.0429	10.1123	12.2084	17.1316	16.9213	16.3149	7.15285	12.7135	12.2077	13.0287	11.4345	14.2285	10.9625	12.8235	12.2701
Xp11.23	NM_006044	10013	HDAC6	histone deacetylase 6	0.932066	-0.101496	0.0268011	0.304114	17.4018	18.6116	13.6344	22.0119	19.1743	20.3057	16.3008	15.6604	17.6512	13.8314	12.7139	15.5453	16.1307	17.0761	17.5031	15.6336	19.9627	14.9097	17.5038	18.7982	17.2086	22.4184	18.9763	20.3715	21.1346	17.1143	17.3959	16.6901	17.5806	18.9566	22.1817	21.5356	15.2846	20.487	23.2104	22.9706	18.7778	19.3327	15.2767	16.6632	17.423
7q22.1	NM_006833	10980	COPS6	COP9 signalosome subunit 6	1.04412	0.062292	0.0268187	0.304114	20.1012	19.5795	16.495	23.328	21.5614	21.8056	22.6	23.1168	23.3945	24.0764	24.1892	25.3106	19.9998	21.3977	20.0433	19.0711	23.6161	25.196	18.5557	16.7723	18.1933	25.6733	22.0057	24.0196	15.7487	17.3793	14.3158	19.9829	22.1468	23.7762	12.711	12.2838	14.4659	18.8319	21.0613	17.5235	24.5307	23.6325	24.3793	19.0245	16.6146
5q31.3	NM_133173	10307	APBB3	amyloid beta (A4) precursor protein-binding, family B, member 3	0.687171	-0.541259	0.0268728	0.304114	5.66348	5.64269	8.08344	6.2226	5.40569	7.48753	3.22827	3.41892	2.50041	0.528785	9e-06	0	5.62996	3.58581	5.86627	2.27097	5.9697	2.41163	9.99485	10.7839	11.8184	4.11619	3.64485	4.93101	8.33183	7.21698	5.19564	2.98668	3.94072	3.16561	4.68477	6.49661	3.37182	3.97869	4.4773	4.36586	4.94584	6.32645	3.80879	2.54999	4.00434
11p15.1	NM_194285	144108	SPTY2D1	SPT2, Suppressor of Ty, domain containing 1 (S. cerevisiae)	1.11427	0.156104	0.0268891	0.304114	5.56321	4.73549	4.05985	5.8391	7.39518	6.1818	5.64075	6.03222	6.02953	6.17259	7.26119	5.53982	6.76714	7.84113	6.5185	6.41555	5.92863	7.31311	3.60556	3.89631	4.09327	5.6105	5.88473	6.74103	2.97264	2.32111	4.21062	7.64913	5.68013	5.82256	2.59102	2.21055	3.45377	5.63976	5.6186	5.48509	6.96005	5.82966	8.64102	4.33663	3.99275
1q31.3	NM_194314	360023	ZBTB41	zinc finger and BTB domain containing 41	0.874622	-0.193269	0.0268957	0.304114	7.739	4.75127	5.329	5.05902	5.63116	5.08225	5.14176	5.28147	4.87784	3.7295	5.54834	3.88795	5.58381	4.99663	4.82304	5.73341	7.40692	7.02552	8.67285	9.06767	8.07897	4.91521	6.31795	5.9044	5.86064	6.93643	9.78261	6.50607	6.17398	6.00583	2.73997	2.17676	5.13407	5.06643	5.76109	5.10196	4.99164	5.81313	8.02289	6.22887	5.61367
17p13.2	NM_053013	2027	ENO3	enolase 3 (beta, muscle)	0.738363	-0.437598	0.0269076	0.304114	2.19176	1.70498	1.34472	1.48236	4.46849	2.26665	3.41728	3.76208	3.58929	1.33178	1.64116	0.003412	3.0128	2.56338	2.30128	3.14273	4.45993	7.39522	1.70217	1.0959	0.816451	3.6753	3.23655	3.09891	4.08677	4.9425	1.7247	5.79233	1.57736	2.53764	4.01858	3.03529	3.55558	6.89606	3.96706	4.1806	2.72531	2.5902	2.05088	3.88713	2.16765
3q27.1	NM_017644	54800	KLHL24	kelch-like family member 24	0.880945	-0.182875	0.0269116	0.304114	14.9474	10.3323	11.2863	10.4786	10.2413	10.0357	9.82938	8.68134	8.29507	7.25505	10.1292	7.41091	10.4058	10.0734	10.4106	14.0567	12.982	14.879	12.9933	11.3534	9.7548	15.0283	16.8011	16.3063	8.5434	8.51365	13.6261	11.8342	9.16614	9.78323	4.91811	5.03951	12.0403	11.4969	13.2836	12.1262	10.8054	12.0225	17.6351	14.0307	12.3445
Xp11.23	NM_003179	6855	SYP	synaptophysin	0.728566	-0.456868	0.0269125	0.304114	28.2533	30.4401	31.3827	26.9825	27.8087	25.0786	13.1165	12.1045	11.9265	1.81234	2.86886	3.28111	22.5605	23.9288	28.6206	7.98353	23.836	9.37539	58.2787	61.8682	64.5989	12.9739	10.4223	8.93357	27.3192	33.8283	25.4399	14.1727	16.3682	19.4523	19.1173	21.5159	8.78397	15.2215	19.6911	15.6541	14.9815	20.1867	13.091	16.222	18.3381
1p36.32	NM_007033	11079	RER1	retention in endoplasmic reticulum sorting receptor 1	1.07679	0.10674	0.026996	0.304648	13.6498	14.5036	15.3182	20.1802	22.5791	19.8423	20.8393	24.3055	25.1244	22.5468	24.7215	26.1949	24.0873	24.5019	24.0077	17.5027	22.2697	17.3532	14.0161	13.7357	13.7966	14.0965	12.8196	14.5338	14.9546	17.3391	14.6244	18.5658	20.1971	18.1851	20.3127	16.7831	16.0121	22.229	21.6311	18.1667	21.7822	17.0957	15.5216	17.7404	16.6519
11q24.2	NR_033839	399972	ST3GAL4-AS1	ST3GAL4 antisense RNA 1 (head to head)	0.835697	-0.258949	0.0270208	0.304648	2.33238	2.32391	3.35204	2.19061	2.45064	2.56978	3.6306	3.16005	3.02109	3.63892	4.27773	2.85895	3.48579	3.09651	2.79966	4.07341	3.75799	3.22991	1.76625	2.38375	1.49541	3.974	3.03648	4.11253	2.63983	3.13991	2.27306	3.30185	3.7807	3.73521	4.54367	4.26707	3.05094	3.79922	3.97286	3.85083	5.26161	4.72601	3.40846	3.51177	5.55637
2p13.3	NM_005791	10199	MPHOSPH10	M-phase phosphoprotein 10 (U3 small nucleolar ribonucleoprotein)	1.20909	0.27392	0.0270808	0.304722	9.49859	8.82624	10.7889	7.797	11.454	8.13906	6.93692	7.97428	7.27693	8.40916	10.0663	8.2518	13.6462	11.224	7.50671	14.1561	9.46386	11.2528	6.33444	6.6594	8.58692	7.09922	6.70273	7.76581	4.01123	2.80729	6.25567	10.0761	8.32769	9.0721	2.17389	1.66465	1.68978	7.75074	7.78243	7.48895	6.91073	7.04206	9.31351	5.81712	5.20989
7q22.3	NM_002736	5577	PRKAR2B	protein kinase, cAMP-dependent, regulatory, type II, beta	0.770636	-0.375878	0.0271364	0.304722	16.0079	10.4126	8.7003	10.5267	10.805	11.2637	8.04939	6.75812	6.24449	1.79336	3.07469	2.35144	10.792	10.182	9.92908	7.55944	12.7848	7.60748	27.6592	23.7513	24.2985	5.32491	6.06046	5.68133	8.76997	12.0781	13.6395	9.33924	8.98189	8.56807	5.83129	4.00117	6.03293	6.73665	8.23469	6.52024	7.98682	11.1053	11.3776	8.57521	8.20115
12p13.31	NM_006331	10436	EMG1	EMG1 N1-specific pseudouridine methyltransferase	1.13272	0.17979	0.0271371	0.304722	6.88852	7.56487	5.94595	10.1671	11.691	10.9253	10.948	13.6464	13.6326	12.5499	12.331	15.6721	8.90379	13.5074	10.1252	15.5994	16.9843	15.8696	8.39414	7.49412	8.36734	9.78925	9.20942	8.95132	6.99147	5.85809	5.59364	11.831	10.8911	10.6093	4.82622	3.70213	8.34919	8.76162	9.7199	7.70207	10.6824	8.46397	9.41159	9.51124	7.09495
10p13	NR_034181	79723	SUV39H2	suppressor of variegation 3-9 homolog 2 (Drosophila)	0.767431	-0.381892	0.0271495	0.304722	3.45723	3.14142	2.73134	3.21543	0.174157	1.95172	2.19799	1.95818	1.31451	0.486918	2.52082	1.41084	4.38229	1.91898	3.30705	4.51928	3.54133	4.01048	3.12404	3.3711	3.22134	3.06017	3.49015	3.46063	2.69876	3.43201	3.52579	2.26956	1.93203	2.34143	1.8964	1.1042	1.80442	3.17948	1.61198	3.23253	1.87199	2.95984	3.67606	1.43266	2.10151
6q16.3	NM_006828	10973	ASCC3	activating signal cointegrator 1 complex subunit 3	1.18657	0.246791	0.0272311	0.305152	7.60694	6.49555	7.13668	6.1129	6.86192	6.72264	9.33662	9.32802	8.00909	12.5078	14.7132	11.4664	4.1225	4.2047	2.45601	8.52786	5.32636	8.02415	6.73901	5.85468	6.53668	8.60487	10.5869	11.2551	6.27237	4.85619	7.95872	9.46446	8.34663	8.12386	2.45137	2.61322	4.938	5.92133	6.31723	6.09275	10.1583	7.68766	10.1537	6.48638	5.08436
10q21.2	NR_024555	9886	RHOBTB1	Rho-related BTB domain containing 1	1.30507	0.384128	0.027249	0.305152	3.0098	1.8811	1.3725	4.4939	4.95781	4.49376	4.58602	5.31401	3.66887	7.86519	10.554	6.78586	2.77496	5.01703	2.64553	6.77203	5.51413	6.04449	3.93774	2.21405	2.15454	3.30605	4.30441	3.40445	2.88873	1.40391	2.62591	4.27952	3.89403	3.50061	0.934085	0.747171	3.24327	3.95413	3.30261	2.62308	6.56267	3.30149	6.3704	4.39763	2.98759
10q11.21	NM_014753	9790	BMS1	BMS1 ribosome biogenesis factor	1.2121	0.277507	0.0273127	0.305523	4.03568	3.17353	2.76589	3.61304	3.70991	4.22661	4.39024	4.57671	4.20958	5.20552	6.59063	5.15886	3.80972	4.01854	2.53873	6.4169	5.64723	7.44494	3.0015	3.72548	3.69474	4.45981	4.12197	4.37978	2.7103	1.34467	2.9274	4.04855	4.11559	4.61021	1.07386	1.2632	1.61199	3.08482	3.55019	3.31473	4.86697	3.43536	5.06119	3.04311	2.82891
4q12	NM_002703	5471	PPAT	phosphoribosyl pyrophosphate amidotransferase	1.11604	0.158386	0.0274255	0.305972	10.1367	8.0071	8.07556	7.52017	7.49905	6.76604	7.37882	7.48462	6.77447	6.11179	8.14703	6.33355	10.3963	9.10352	7.89779	8.7325	10.0546	9.17236	5.75613	5.69835	5.90018	5.32172	5.71222	6.16891	4.61228	3.77464	5.97897	6.82732	6.38605	6.10131	2.89116	2.40473	3.6542	6.39169	7.70378	6.81857	7.5024	6.59012	9.88469	6.63258	5.13539
9q34.13	NM_007344	7270	TTF1	transcription termination factor, RNA polymerase I	1.23693	0.306763	0.0274647	0.305972	2.99079	2.82873	2.48297	3.2622	3.16979	3.41052	2.36581	2.80948	2.73942	2.06388	3.27605	2.87749	3.24104	3.54155	2.28478	3.68339	3.50741	3.6482	2.85497	2.99432	4.05845	1.93723	2.37326	2.07877	1.76189	1.22567	1.71233	3.08582	2.57447	2.57895	0.669561	0.705091	0.753227	2.21754	2.62625	2.11043	2.06551	2.50669	4.11011	2.49936	2.04444
13q12.12	NM_000231	6445	SGCG	sarcoglycan, gamma (35kDa dystrophin-associated glycoprotein)	1.26953	0.344293	0.0274767	0.305972	1.73753	0.527542	0.96456	1.5399	1.55869	2.15482	1.97379	3.30366	1.51327	2.36113	2.1986	1.89124	0.444092	1.22567	0.764774	2.29881	1.94897	2.19733	0.464094	0.706476	0.460506	0.785601	1.07906	1.08139	1.27845	1.16351	1.05869	2.87374	2.5074	2.33871	0.439022	0.4234	0.560213	1.39958	0.997558	1.39353	5.04422	2.62986	2.84801	1.16948	0.778834
7q22.3	NM_019042	54517	PUS7	pseudouridylate synthase 7 homolog (S. cerevisiae)	1.28983	0.367179	0.0275095	0.305972	2.38834	2.2184	2.11106	2.2045	2.19793	2.85737	2.58243	3.14006	2.24701	3.05148	3.84898	3.00464	4.17615	4.69567	3.70464	3.75415	3.2522	2.93821	2.29355	2.06503	2.38316	1.97458	2.19647	2.0133	0.976559	0.898475	1.13014	2.29581	2.32267	1.7451	0.63233	0.805183	1.08553	1.99219	1.98557	1.89831	2.44761	1.62954	2.37699	1.37782	1.19383
2p13.1	NM_006636	10797	MTHFD2	methylenetetrahydrofolate dehydrogenase (NADP+ dependent) 2, methenyltetrahydrofolate cyclohydrolase	1.1765	0.234496	0.0275217	0.305972	15.3337	11.6124	14.7146	14.3323	20.9374	19.81	24.7149	31.4443	27.7908	43.1948	45.2445	37.7199	21.5419	20.4057	12.8982	34.8885	24.867	31.8345	10.5478	10.8011	7.68377	21.0406	22.9119	26.8537	11.8028	8.18807	12.9306	36.1401	36.1765	32.5714	4.49954	5.53701	15.4579	19.8524	19.4433	15.8834	33.0479	17.6737	26.8365	13.3044	8.29799
3q13.33	NM_004547	4710	NDUFB4	NADH dehydrogenase (ubiquinone) 1 beta subcomplex, 4, 15kDa	0.964718	-0.0518204	0.0275368	0.305972	98.2633	74.9302	123.56	95.5565	109.278	88.1649	94.9851	105.472	101.561	77.6548	90.4311	88.6712	120.848	93.3333	100.239	87.3439	82.6823	83.669	84.0707	79.8407	74.8705	95.768	85.2818	92.2046	64.3059	102.714	81.8635	94.0916	110.022	120.937	174.968	154.007	66.2199	110.81	106.72	115.471	106.437	121.299	85.0065	114.782	114.298
1p33-p32.3	NM_001144774	1996	ELAVL4	ELAV like neuron-specific RNA binding protein 4	0.715814	-0.482344	0.0275923	0.306193	7.17806	6.32348	4.8127	3.78655	3.57954	2.85126	4.78148	1.76095	2.29505	0.48924	0.604311	0.662309	4.01384	6.2653	3.28171	5.06627	7.09149	3.99888	13.4212	12.381	9.84139	3.34307	3.94215	2.49369	2.74694	4.22957	6.03591	5.05024	3.45504	2.85549	1.10115	1.21538	2.55064	3.29153	4.61619	4.02268	4.96355	4.49148	5.90941	2.76462	3.28039
1q23.1	NM_004494	3068	HDGF	hepatoma-derived growth factor	0.92949	-0.105488	0.0276181	0.306193	40.9127	42.3	45.9367	38.7355	34.1952	37.0852	34.5068	36.8274	32.1716	33.7037	36.7796	43.0323	35.2543	32.9906	39.1387	42.9078	48.4488	26.8312	30.0337	23.6287	26.1484	62.0279	52.1311	61.311	35.0495	44.6799	35.3149	47.633	43.5605	45.8506	56.8582	52.577	33.1534	57.2205	57.7473	65.7552	47.9961	48.1724	33.3459	45.5919	43.5172
19p13.11	NM_015692	27151	CPAMD8	C3 and PZP-like, alpha-2-macroglobulin domain containing 8	0.718791	-0.476355	0.0277217	0.306782	0.758837	0.711573	0.908791	1.37843	0.928641	1.28706	1.03376	1.20006	1.29299	1.81823	1.83803	2.40198	2.0768	3.87991	2.13248	1.54093	2.0111	3.18396	0.608741	0.445061	0.624354	10.7437	10.2735	9.81888	1.17303	1.00327	0.855773	2.38173	2.34533	2.76981	2.32041	2.00552	1.33675	2.64571	2.2808	2.42286	2.33605	1.18274	1.58335	0.693211	0.689355
22q11.21	NM_006440	10587	TXNRD2	thioredoxin reductase 2	1.35739	0.440831	0.0277369	0.306782	1.87274	2.24892	1.81922	3.47367	3.35122	3.04723	2.3765	2.71485	2.75176	3.33234	3.58713	4.65505	2.89636	2.77545	2.08465	1.3963	2.99969	2.75018	2.47663	2.7061	2.72971	0.211547	0.182915	0.147277	3.44817	3.24377	2.25916	3.57326	3.6038	4.21955	1.94334	1.53956	1.14547	1.90472	2.02347	2.47876	3.84636	3.31299	2.16271	2.54121	2.18673
16p13.3	NM_001089	21	ABCA3	ATP-binding cassette, sub-family A (ABC1), member 3	0.759872	-0.396172	0.0277895	0.306782	8.65911	10.1449	7.17371	11.2878	9.13327	9.18524	8.14391	6.95957	8.44086	1.85217	2.54082	2.61998	6.73742	6.79489	7.48536	3.6462	6.82071	3.58109	17.0825	16.6922	18.5793	6.29122	4.978	5.7419	12.6038	12.3872	10.5317	6.7652	8.1877	9.65042	17.867	14.7625	9.00556	8.53442	9.99503	10.2115	8.38496	11.787	7.46382	11.2628	13.528
17q24.2	NM_014906	22843	PPM1E	protein phosphatase, Mg2+/Mn2+ dependent, 1E	0.763395	-0.389498	0.0277942	0.306782	4.27912	3.50527	2.32614	2.2665	3.35893	3.02872	2.74835	2.22435	2.04714	0.471179	0.870119	0.503304	2.38091	2.83629	2.42366	2.11766	2.20196	2.8033	8.40901	9.42957	9.1706	3.84886	3.7843	3.28259	3.64413	4.52855	4.38124	2.15645	2.12075	1.97593	1.93259	1.55484	2.69637	2.38347	2.69769	1.86454	2.84187	3.30641	2.5847	3.32144	3.54328
11p15.4	NM_016320	4928	NUP98	nucleoporin 98kDa	1.10202	0.140146	0.0278491	0.307048	9.43118	9.2967	7.42135	9.30805	8.41136	9.51703	10.8614	10.5944	9.3381	13.1412	14.7397	11.2424	6.7516	8.47986	7.0317	12.0881	10.8385	13.0989	5.69856	6.72459	6.6302	11.4909	12.284	12.5299	6.96816	6.62943	7.22438	9.00505	8.77615	8.40718	4.87555	5.27648	9.95435	9.75625	10.2203	9.06852	11.3782	8.73402	10.5986	8.08975	9.80003
18q12.2	NM_018255	55250	ELP2	elongator acetyltransferase complex subunit 2	1.1815	0.240619	0.0278949	0.307213	7.51004	4.53755	6.68646	8.48286	10.4363	9.91972	7.31721	7.93366	11.7709	14.5796	20.1923	16.0753	10.5082	9.74566	8.82422	7.28924	13.6177	9.13692	8.7103	8.86623	6.50836	5.67165	4.71377	4.31278	5.63488	3.16999	6.21876	12.8442	13.008	11.6202	3.63364	2.13056	6.73317	10.8759	9.82861	7.40047	14.4515	7.03691	6.72293	8.21635	6.44176
3q26.31	NM_022763	64778	FNDC3B	fibronectin type III domain containing 3B	1.26486	0.338979	0.0279636	0.307631	3.61159	6.03925	3.24767	6.42622	6.68473	8.20703	6.59619	10.3985	8.79138	16.6754	14.6225	15.7668	4.62361	11.411	7.45844	10.487	4.99229	9.59364	2.68445	5.13355	3.73964	8.71199	10.309	8.31288	5.41522	3.94053	5.02399	9.38162	5.27887	5.52195	3.48212	4.66271	8.33212	3.06522	5.91619	4.81685	8.49934	7.57957	6.54579	5.93774	3.54058
2q21.3	NM_014607	23190	UBXN4	UBX domain protein 4	1.08572	0.118656	0.028014	0.307846	20.5304	12.8747	14.1311	16.2445	20.3159	17.1805	23.1029	22.6336	22.3123	26.0325	34.4858	26.1684	18.3246	14.8043	13.9891	23.4243	18.1111	28.4532	13.735	13.2802	14.9406	18.2552	20.0222	20.1781	11.4993	11.0371	15.6027	21.6522	21.684	20.9959	8.99338	8.14657	11.5618	19.0544	17.3608	16.6715	23.2398	19.485	25.8228	17.6592	16.12
9p21.2	NM_001004125	286319	TUSC1	tumor suppressor candidate 1	0.735026	-0.444132	0.0280936	0.307887	1.71822	1.33821	2.70728	1.86604	2.58913	2.18112	1.32754	1.20971	1.98961	1.33042	1.59744	1.7813	4.34402	3.69385	3.69534	2.45334	2.82047	1.80126	2.51276	2.79913	4.0446	3.31855	2.21	3.72087	2.98407	4.09024	2.81808	3.91634	4.20361	4.87645	6.99025	6.68657	2.92754	1.27146	1.63572	1.47476	0.28624	0.48671	0.090715	1.13602	1.37391
3q22.1	NM_153240	27031	NPHP3	nephronophthisis 3 (adolescent)	1.24124	0.311787	0.0281033	0.307887	1.20196	0.639407	0.970592	2.61204	3.28279	3.46094	3.23908	3.21506	2.9271	4.46619	5.72861	4.52623	1.91899	2.12896	1.58609	3.00573	1.87705	2.46821	1.45159	1.28488	1.58463	1.94044	2.56216	3.01803	1.8295	1.39122	2.08837	4.01242	2.70931	2.76911	1.34973	1.33624	2.12697	2.66596	2.67716	2.66418	4.52812	3.0627	3.70835	2.47999	1.65688
14q11.2	NM_173527	161253	REM2	RAS (RAD and GEM)-like GTP binding 2	0.769026	-0.378895	0.0281172	0.307887	3.53633	3.71454	4.16404	5.49011	5.70785	5.03367	2.63927	2.49708	2.8208	0.84653	1.22014	1.18026	3.03954	3.14296	3.62542	2.56768	3.66573	1.89499	5.7661	5.8788	6.57016	5.00095	3.77078	4.34858	4.26136	5.66868	4.96917	3.45157	4.75533	5.40799	5.52439	6.08628	2.12326	2.87283	3.04003	3.08337	2.91967	4.29886	3.69837	4.31505	4.07998
19p13.3	NM_032853	84939	MUM1	melanoma associated antigen (mutated) 1	0.882133	-0.180931	0.0281412	0.307887	5.10781	6.03156	3.5456	8.7553	7.17015	6.73413	6.54142	7.16519	6.5957	4.52731	4.07936	5.6275	3.84843	4.84221	5.71276	5.76149	8.38826	5.84579	8.16159	8.42895	8.7008	7.6585	6.86793	6.58975	7.81704	7.55849	6.48466	8.75135	8.23547	9.60727	9.0514	8.55189	5.93216	6.31662	7.05409	7.64209	7.7991	6.01081	5.39791	6.58193	7.42357
12p13.2	NM_018048	55110	MAGOHB	mago-nashi homolog B (Drosophila)	1.24694	0.318397	0.0281997	0.308189	1.90755	1.24587	1.83201	2.79102	3.45845	3.25467	3.1241	3.5784	3.48005	3.28712	3.81603	2.96889	6.00107	5.15557	4.15576	4.27972	4.18226	2.8076	1.87919	2.03198	1.89885	1.76739	1.73941	1.83436	1.40512	1.16398	1.60521	3.35151	3.27687	3.24629	0.695375	0.892911	1.6964	2.68645	2.5628	2.56339	2.49811	2.12648	2.57315	2.45116	1.13885
11q13.4	NM_018320	55298	RNF121	ring finger protein 121	1.17069	0.227364	0.0283413	0.308346	3.35489	4.57093	2.36628	3.91768	3.61066	4.53571	6.88896	5.53636	4.08798	5.45811	5.16437	6.63127	3.99782	5.38189	2.85365	3.56486	5.1974	4.49352	3.39653	2.83478	4.18461	4.83987	3.67059	5.62493	3.01453	3.83929	2.45898	3.33044	4.81066	4.77819	1.9637	2.61889	3.24152	4.38558	5.089	2.26517	6.02403	4.115	4.64894	2.68398	4.30292
8p21.1	NM_018246	55246	CCDC25	coiled-coil domain containing 25	1.13527	0.183036	0.028395	0.308346	6.60551	4.48135	6.3818	6.38125	8.55515	6.80236	7.85302	6.84521	6.74179	5.39373	8.07441	5.89927	8.20644	7.1298	5.65075	6.7914	9.16597	9.8428	5.43589	5.02913	5.27054	6.05149	6.85597	5.79849	3.74556	2.35871	4.45029	7.30945	6.71835	7.7789	2.37677	1.96208	2.73861	5.59059	6.55724	5.43615	7.57915	6.54578	8.69513	4.70032	4.26968
1q23.1	NM_001878	1382	CRABP2	cellular retinoic acid binding protein 2	1.11451	0.156411	0.0284036	0.308346	38.3189	39.6464	59.6869	137.294	127.413	104.172	202.46	230.63	240.692	102.892	96.7648	101.206	78.3358	82.7893	51.4227	52.706	60.0857	41.2892	15.5077	15.6821	12.6705	85.6825	82.052	84.2197	44.4012	44.4297	43.7966	81.2584	114.147	110.897	89.78	93.4742	47.1474	129.845	120.709	115.446	160.289	126.257	94.1882	107.585	88.6031
3q21.1-q21.2	NM_001024660	8997	KALRN	kalirin, RhoGEF kinase	0.785367	-0.348562	0.0284176	0.308346	3.15672	3.78103	1.36758	4.2683	3.27341	4.25784	3.05653	2.11451	2.56582	0.447973	0.789942	0.704734	1.67412	2.42358	2.16169	3.18943	3.86248	2.72305	5.77626	6.20224	5.99696	2.43375	2.54867	2.04671	6.36817	3.44429	3.78079	3.00742	2.63129	3.37645	2.9621	2.87739	3.69433	2.3366	2.85666	2.49876	2.91614	3.59517	3.45881	2.63754	4.02261
3p21.1-p14.3	NM_018398	55799	CACNA2D3	calcium channel, voltage-dependent, alpha 2/delta subunit 3	0.784965	-0.349299	0.0284181	0.308346	1.96769	1.87205	1.79965	1.17617	0.931154	0.816826	1.13148	2.17235	1.85831	1.33966	1.88347	2.04932	0.818773	0.744599	0.649675	1.47177	0.8782	2.31075	6.72404	7.44352	8.36568	0.471439	0.66221	0.852903	1.73053	1.4153	1.83583	3.29878	2.87671	3.17019	3.1935	3.02398	7.1264	1.21739	1.51326	1.27373	2.35076	2.68028	2.18695	1.24478	2.07596
17p13.1	NM_021210	58485	TRAPPC1	trafficking protein particle complex 1	1.04334	0.061214	0.0284662	0.308346	34.4075	32.0286	35.6514	39.5333	41.0559	37.454	39.0827	39.3233	45.2002	31.9138	29.7012	32.3272	31.7248	33.8241	29.6567	27.7441	38.3334	32.2602	35.0123	32.9475	27.8349	29.3745	24.3278	33.2346	28.0223	16.2592	24.6108	31.2862	33.332	37.592	40.854	27.8758	23.744	32.9371	34.8577	30.0306	42.278	36.52	25.4776	30.1607	27.1578
6q11.1	NM_152688	202559	KHDRBS2	KH domain containing, RNA binding, signal transduction associated 2	0.721097	-0.471736	0.0284734	0.308346	1.37934	1.50583	1.41283	1.71068	1.61813	1.97105	1.45938	1.5818	1.4938	1.37493	1.60632	1.85056	1.06881	1.46774	1.3644	0.331081	0.080115	0.117875	7.93594	6.61897	6.3191	2.48506	3.05548	2.12981	0.108271	0.116178	0.356241	3.20202	2.78865	2.60607	1.77901	2.20297	2.94955	2.14034	2.95971	2.18173	2.25569	3.80848	3.13316	3.20685	2.69443
8p21.3	NM_001722	661	POLR3D	polymerase (RNA) III (DNA directed) polypeptide D, 44kDa	1.09178	0.126682	0.0285162	0.308346	14.6492	17.2816	9.24176	11.347	14.0604	13.3448	16.4937	15.6662	19.3801	20.0677	18.3489	21.0445	14.4298	16.4541	17.1212	19.1101	19.8328	14.9139	9.99663	11.1177	9.42354	15.9706	14.8145	16.835	12.3766	8.50075	10.805	16.3055	15.5528	14.3056	9.01622	9.66339	11.8345	15.9625	17.1558	15.9117	15.0669	12.1888	13.8934	10.0762	11.5157
[truncated: 9,057 more rows]
[truncated: 55 more columns]
