# Supplementary material for: Data integration of bulk and single-cell transcriptomics from cerebral organoids and post-mortem brains to identify cell types and cell type specific driver genes in autism
Source: Research Square preprint supplement (doi:10.21203/rs.3.rs-113869/v1), 2020-12-02
Supplement: Supplementary file 3 [file 133a2ab3b74f7edbd101b03d.xlsx]

## Sheet: DIN
Sample	DNA Integrity Number (DIN)
PGP1	6.9
GM23716	7.7
GM23720	8.6
GM25256	8.5
BYS0110	8.3
BYS0111	8
BYS0112	8.2
BXS0114	8.1
BXS0115	8.9
BXS0116	8.4
BXS0117	7.4
902	7.4
1601	7.7
1401	7.1
1001	7.8
901	8
14758.x3	8.2
14799.x1	8.1
14824.x13	8.6
14763.x7	7.8
14739.x3	7.4
14765.x2	7
14710.x6	7.3
14781.x16	8.3
14746.x8	8.4

## Sheet: RIN
Sample	RNA Integrity Number (RIN)
PGP1_1	8
PGP1_2	7.8
PGP1_3	8.5
GM23716_1	8.9
GM23716_2	8.6
GM23716_3	8.1
GM23720_1	8.4
GM23720_2	8.7
GM23720_3	8.6
GM25256_1	8.1
GM25256_2	7.3
GM25256_3	7.6
BYS0110_1	8.1
BYS0110_2	7.4
BYS0110_3	7.2
BYS0111_1	7.6
BYS0111_2	7.7
BYS0111_3	8.4
BYS0112_1	7.5
BYS0112_2	8
BYS0112_3	7.7
BXS0114_1	7.9
BXS0114_2	7.4
BXS0114_3	6.5
BXS0115_1	9.2
BXS0115_2	7.5
BXS0115_3	8.4
BXS0116_1	8.3
BXS0116_2	7.3
BXS0116_3	7.2
BXS0117_1	8.4
BXS0117_2	7.4
BXS0117_3	7.7
902_1	7.9
902_2	8.5
902_3	8.2
1601_1	8.2
1601_2	8.3
1601_3	8.7
1401_1	7.8
1401_2	8.3
1401_3	7.9
1001_1	7.9
1001_2	8.5
1001_3	8
901_1	7.9
901_2	7.9
901_3	7.6
14758.x3_1	8.4
14758.x3_1	9.3
14758.x3_1	9
14799.x1_1	7.9
14799.x1_2	8.4
14799.x1_2	9.1
14824.x13_1	6.4
14824.x13_2	8.7
14824.x13_3	8
14763.x7_1	7.3
14763.x7_2	8
14763.x7_3	7.5
14739.x3_1	7.1
14739.x3_2	7.5
14765.x2_1	7.5
14765.x2_2	8.9
14765.x2_3	8
14710.x6_1	7.7
14781.x16_1	8.2
14781.x16_2	9.5
14781.x16_3	8.7
14746.x8_1	9
14746.x8_2	9.2
