# Supplementary material for: Data integration of bulk and single-cell transcriptomics from cerebral organoids and post-mortem brains to identify cell types and cell type specific driver genes in autism
Source: Research Square preprint supplement (doi:10.21203/rs.3.rs-113869/v1), 2020-12-02
Supplement: Supplementary file 6 [file 5d1a34c5c9725c6ff91b9ee6.xlsx]

## Sheet: Power calculations
Mean FPKM in Resilient Individuals	% FWER≤0.05
	Mean Fold Change in ASD=1.2	Mean Fold Change in ASD=1.5	Mean Fold Change in ASD=2	Mean Fold Change in ASD=4
2	0.056	0.052	0.062	0.113
3	0.053	0.045	0.065	0.21
4	0.05	0.055	0.073	0.301
5	0.046	0.053	0.093	0.436
6	0.055	0.053	0.112	0.603
7	0.052	0.066	0.14	0.707
