# Supplementary material for: Data integration of bulk and single-cell transcriptomics from cerebral organoids and post-mortem brains to identify cell types and cell type specific driver genes in autism
Source: Research Square preprint supplement (doi:10.21203/rs.3.rs-113869/v1), 2020-12-02
Supplement: Supplementary file 7 [file 7063b61d2c54716e99e7e943.xlsx]

## Sheet: 16p11.2 Full GeneScores
	c1		c2		c3		c4		c5		c6		c7		c8		c9		c10
	GeneScore	P(GeneScore)	GeneScore	P(GeneScore)	GeneScore	P(GeneScore)	GeneScore	P(GeneScore)	GeneScore	P(GeneScore)	GeneScore	P(GeneScore)	GeneScore	P(GeneScore)	GeneScore	P(GeneScore)	GeneScore	P(GeneScore)	GeneScore	P(GeneScore)
YPEL3	1.02598	0.07195	0.762073	0.18484	1.73307	0.02321	0.449673	0.03791	0.944142	0.03371	0.615785	0.04433	0.235968	0.12088	1.67475	0.02266	0.828115	0.02011	0.573208	0.02783
KCTD13	0.658	0.03113	0.59746	0.50565	1.26999	0.01679	0.745007	0.10433	0.727299	0.10424	0.510584	0.05995	0.286112	0.39185	1.21389	0.02343	0.906465	0.02148	0.667359	0.03693
ASPHD1	0.722055	0.21225	0.570641	0.87412	1.02321	0.02966	0.5364	0.21265	0.603229	0.1478	0.477137	0.07233	0.30155	0.53767	0.664514	0.09471	0.578516	0.0611	0.762484	0.1911
INO80E	0.574671	0.08029	0.522598	0.59248	1.14978	0.04629	0.551525	0.08405	0.681044	0.07313	0.465484	0.07466	0.240702	0.43362	1.35243	0.04614	0.968606	0.02713	1.0154	0.12582
MAZ	0.747015	0.13595	0.820404	0.82671	1.53468	0.06624	0.829506	0.2016	0.850147	0.1927	0.677165	0.093	0.467366	0.54717	1.30147	0.14433	1.2043	0.04921	1.29536	0.15541
PAGR1	0.650681	0.15466	0.611876	0.49221	1.37482	0.06936	0.418885	0.09539	0.791946	0.12434	0.548907	0.12039	0.28318	0.44942	1.37102	0.09417	0.923268	0.05849	0.831908	0.09739
FAM57B	0.5455	0.09488	0.63171	0.83583	1.11697	0.06897	0.805289	0.18993	0.654144	0.27022	0.49041	0.13493	0.328685	0.62207	0.908744	0.11727	0.881431	0.04015	0.895287	0.11551
PPP4C	0.736272	0.21677	0.725982	0.90917	1.2708	0.10329	0.812156	0.22118	0.823502	0.24012	0.631854	0.13694	0.433829	0.5965	1.1681	0.17803	1.14101	0.06361	1.66413	0.1704
MAPK3	0.802822	0.28655	0.55717	0.6404	1.15116	0.14795	0.418512	0.15559	0.686395	0.15602	0.464021	0.15282	0.206144	0.45667	1.00281	0.21434	0.548585	0.17403	0.475576	0.19656
SLX1B	0.10551	0.16051	0.104844	0.19163	0.297997	0.15941	0.0620608	0.15495	0.128362	0.16673	0.0817325	0.16065	0.0309181	0.25289	0.287606	0.16866	0.137348	0.15034	0.0850427	0.16229
TAOK2	0.606033	0.10717	0.523812	0.6816	1.06928	0.13967	0.453154	0.13818	0.662535	0.24092	0.424042	0.22389	0.281129	0.46829	0.96452	0.20034	0.627671	0.05431	0.316222	0.08839
KIF22	0.415969	0.44597	0.364089	0.8839	0.663474	0.22812	0.257329	0.5697	0.41759	0.44224	0.371898	0.23458	0.385241	0.42029	0.4944	0.54455	0.605158	0.22149	0.59045	0.27036
TMEM219	0.591382	0.56709	0.446208	0.91576	1.15059	0.45952	0.391254	0.55444	0.421121	0.72098	0.5845	0.29814	0.229419	0.73564	0.804521	0.72581	0.516426	0.52965	0.254318	0.69132
BOLA2B	0.184756	0.34777	0.178503	0.89594	0.379656	0.2967	0.232753	0.24857	0.207226	0.36663	0.163465	0.30844	0.0821853	0.57408	0.351845	0.40391	0.290332	0.18221	0.394818	0.22325
ALDOA	0.737877	0.33388	0.629272	0.86121	1.08548	0.33593	0.478622	0.30961	0.875329	0.3031	0.541892	0.31441	0.254588	0.59821	0.950962	0.41442	0.603985	0.32076	0.624028	0.34182
SULT1A4	0.0424119	0.31532	0.0358132	0.31886	0.111128	0.26179	0.0214642	0.26541	0.0429402	0.28698	0.0283999	0.33277	0.0107323	0.32786	0.0969631	0.2859	0.0496555	0.26804	0.034409	0.27923
CORO1A	0.544553	0.32676	0.298915	0.7165	0.552121	0.2783	0.361372	0.14967	0.490613	0.31338	0.245153	0.40822	0.146807	0.38024	0.517971	0.31882	0.352268	0.13449	0.211731	0.17709
CDIPT	0.741479	0.1968	0.535041	0.67457	1.04111	0.31172	0.3688	0.1713	0.684761	0.24451	0.431883	0.44463	0.173744	0.52576	0.988758	0.33492	0.554543	0.20039	0.309518	0.24167
PRRT2	0.562434	0.18341	0.407074	0.70971	0.841163	0.26686	0.372929	0.22111	0.598466	0.32605	0.320108	0.47778	0.180212	0.58281	0.704078	0.35344	0.413104	0.14173	0.232564	0.19611
SEZ6L2	0.61664	0.41459	0.327367	0.95927	0.399969	0.79165	0.30137	0.31979	0.596442	0.43189	0.225876	0.80327	0.170031	0.62133	0.299206	0.8112	0.197154	0.53838	0.204257	0.60153

## Sheet: 15q11-13 Full GeneScores
	c1		c2		c3		c4		c5		c6		c7		c8		c9		c10
	GeneScore	P(GeneScore)	GeneScore	P(GeneScore)	GeneScore	P(GeneScore)	GeneScore	P(GeneScore)	GeneScore	P(GeneScore)	GeneScore	P(GeneScore)	GeneScore	P(GeneScore)	GeneScore	P(GeneScore)	GeneScore	P(GeneScore)	GeneScore	P(GeneScore)
HERC2	1.04845	0.13476	0.930149	0.15249	3.23751	0.1072	1.19424	0.18708	1.52979	0.13574	0.944324	0.1703	0.638625	0.29394	2.41465	0.101	1.25197	0.11089	0.756886	0.09719
TUBGCP5	0.886559	0.18041	0.728506	0.16962	2.35179	0.12355	0.744391	0.2177	1.27355	0.16246	0.784382	0.21206	0.425206	0.31376	1.85885	0.11028	0.92353	0.10874	0.545528	0.11835
NIPA2	0.856682	0.18886	0.716815	0.22046	2.08508	0.12386	1.08875	0.22637	1.15064	0.17647	0.901494	0.20123	0.513689	0.33138	1.82571	0.12871	1.11974	0.16828	0.920737	0.19822
CYFIP1	0.827683	0.18725	0.891869	0.22261	2.3721	0.10867	1.22493	0.20201	1.15505	0.17727	0.824715	0.21841	0.682123	0.3486	1.95843	0.13108	1.21884	0.21582	1.16745	0.20772
UBE3A	0.906288	0.18791	0.747485	0.27046	2.26535	0.12785	1.60121	0.23182	1.26393	0.18459	0.999182	0.20847	0.630374	0.34129	1.84638	0.13608	1.18637	0.17746	1.3048	0.22206
NIPA1	0.389632	0.31399	0.246474	0.34723	0.953402	0.20512	0.407297	0.30322	0.680573	0.2251	0.369367	0.28459	0.247357	0.40217	0.557439	0.23888	0.245359	0.19856	0.20387	0.2344
OCA2	0.297858	0.21767	0.273826	0.31657	0.744442	0.17242	0.512033	0.23731	0.38551	0.23063	0.289505	0.24582	0.223097	0.3303	0.612114	0.18879	0.394473	0.24057	0.500859	0.27723
NDN	0.337354	0.3769	0.268936	0.51516	0.69804	0.26147	1.06711	0.24732	0.566181	0.31364	0.391124	0.36192	0.381212	0.41017	0.270876	0.49687	0.468065	0.40463	0.828708	0.30118
SNURF	0.419035	0.37585	0.288807	0.41487	1.12961	0.2138	0.396637	0.28276	0.738038	0.25182	0.251348	0.48777	0.160695	0.38549	0.279813	0.34673	0.187878	0.35107	0.217525	0.33185
GABRB3	0.416931	0.36412	0.214238	0.50925	1.10435	0.25343	1.11144	0.28906	0.654945	0.29475	0.499495	0.29633	0.369497	0.40477	0.331555	0.41955	0.293989	0.34733	0.312015	0.33356
SNRPN	0.365204	0.41706	0.247645	0.48743	0.959664	0.21103	0.440397	0.26598	0.607164	0.26645	0.221789	0.51253	0.188523	0.40058	0.155752	0.48671	0.159847	0.45328	0.223123	0.39735
