# Supplementary material for: Data integration of bulk and single-cell transcriptomics from cerebral organoids and post-mortem brains to identify cell types and cell type specific driver genes in autism
Source: Research Square preprint supplement (doi:10.21203/rs.3.rs-113869/v1), 2020-12-02
Supplement: Supplementary file 11 [file 9fd4cf7528e3db617cb1ffcd.xlsx]

## Sheet: Cell type specific genes
c1 (126 genes)	c2 (99 genes)	c3 (49 genes)	c4 (118 genes)	c5 (78 genes)	c6 (178 genes)	c7 (266 genes)	c8 (47 genes)	c9 (80 genes)	c10 (61 genes)
MYLPF	TTR	RGS5	NEUROD6	GNGT1	SST	APLN	COL2A1	COL1A1	PCDH7
TNNC2	CP	HAND2	C1orf61	DCT	APOA1	COL4A1	COL11A1	COL1A2	GPC3
MYL1	WLS	GATA3	PTPRZ1	RCVRN	FABP1	PGF	EPYC	COL3A1	SPATS2L
TNNT3	IGFBP7	HAND2-AS1	FABP7	NEUROD1	GSTA1	CD93	COL9A1	POSTN	APOC1
MYH3	SPATA22	PLP1	AC018730.1	CRABP1	AFP	CLDN5	HAPLN1	IGFBP4	PAX7
ACTC1	SPARCL1	PHOX2B	PMP2	GNB3	EPCAM	ANGPT2	COL11A2	DCN	CHODL
MYH8	CXCL14	ALCAM	BASP1	PDE6H	MT1G	HLA-B	LECT1	OGN	SMC2
ACTA1	TPBG	CDH19	NTS	PDC	MUC13	STC1	C2orf82	FBLN1	APOE
TNNT2	TRPM3	LGI4	TUBB2B	RIMS2	RBP2	ARHGAP29	FMOD	SFRP2	CLCN5
TTN	LRRIQ1	PRPH	MAP2	PCBP4	TSPAN8	GNG11	MIA	VCAN	RPS3
TNNI2	GFAP	PHOX2A	DBI	OTX2	APOC3	GPR116	COL9A3	IGF1	MST4
CKM	AGT	AKAP12	BHLHE22	UNC119	LGALS4	MMP1	COL9A2	DLK1	RPS18
TPM2	AQP4	ITIH5	SLC1A3	CPLX4	AGR2	CD34	CRISPLD1	ATF5	CCDC102B
MYBPC1	CA2	RGS4	SOX11	AIPL1	FXYD3	RGCC	PRELP	COL5A2	RPL6
TNNI1	NTRK2	S100A6	PEA15	RORB	MT1E	MYO10	ACAN	NFKBIZ	FAM178A
MYL4	CCDC173	GPR22	HMGCS1	TULP1	APOB	ESAM	FOXC1	TIMP1	CD82
TPM1	PIFO	NCOA7	GPM6A	TFPI2	SPINK1	KDR	MATN1	COL6A3	RPS6
ENO3	CETN2	ISL1	TUBA1A	NRL	CLDN4	ESM1	TIMP3	C1R	RPL10A
NEXN	SYNE2	TFAP2B	NSG2	RP1	DMBT1	INSR	EDIL3	RRBP1	RPL11
TNNC1	ZIC1	GNAS	STMN1	CADM2	KRT18	HLA-E	BMP5	SPARC	RPL31
MYBPH	TAOK1	CARTPT	MARCKSL1	CELF4	SERPINA1	UACA	SLPI	CCDC80	CFH
SLN	WNT2B	OLFML2A	RTN1	KIAA1107	FABP6	GPRIN3	CYR61	PLAC9	RPS12
DES	MSX1	TAC3	DCX	FSTL5	LGALS3	MAP4K4	MATN3	COL6A2	RPS14
TRDN	PMCH	SYTL4	NNAT	NEUROD4	APOA2	NUAK1	COL27A1	NUPR1	RPL12
CASQ2	PLTP	RBMS3	LMO3	CADPS	GSTA2	MYH9	BAMBI	C1S	RPS15A
MYBPC2	RSPO2	SLC18A2	NCAN	SYP	OLFM4	TNFAIP8L1	S100A13	COL5A1	RPL14
ACTN2	PRNP	DBH	BCAN	ISOC1	KRT8	DUSP6	MSMP	SERPINH1	RPS4X
HSPB3	APCDD1	FGL2	FOXG1	SRRM4	S100A14	UTRN	PIEZO2	GSN	RPL4
MYOG	ABHD2	GATA2	GRIA2	IMPG2	MT1H	HBEGF	FGFR1	C7	RPL13A
ARPP21	RMST	PMEPA1	SOX4	WIF1	MT2A	EGFL7	NRK	JUNB	GAS5
STAC3	SLC5A3	ZFHX3	HOPX	PMEL	TFF3	ELTD1	PAPSS2	COL6A1	CENPF
LMOD3	CNTNAP2	GAL	LINC00461	PAX6	KRT19	CDH5	COL8A2	APOD	RPL26
BIN1	DNAAF1	ICA1	FEZ1	MAB21L1	MTTP	PXDN	MATN4	ASPN	GNB2L1
ANKRD1	PSAP	PMP22	TUBB2A	CRX	FABP2	ETS1	MMP16	FN1	RPL37
TRIM55	ATP1A2	CNTN1	ENC1	SCG3	C19orf77	PLXND1	VASN	PI15	RPL7A
SMPX	PTN	GAS7	NEUROD2	DAPL1	ELF3	EFCAB14	S100A1	IFITM3	MATN2
MURC	STRIP2	SCG5	HN1	ENO2	ALDH1A1	CAV1	MMP13	ITM2A	RPS23
HRC	C1orf194	TH	MAPT	TPD52	GCG	COL4A2	SDC2	CRABP2	RPL13
YBX3	SPA17	MPZ	GNAO1	OPN1SW	MT1X	PTRF	ITGA10	OLFML3	RPL5
LINC00948	SLC22A17	TMOD1	POU3F3	SPP1	SAT1	SH3BP5	FRZB	ISLR	MYF5
LMO7	C1orf192	COL18A1	POU3F2	NCKAP5	OAT	ARHGAP18	FAM101A	LRRC17	RPS7
MYOZ2	KIF9	COL20A1	CRMP1	C8orf46	TM4SF20	SDPR	NUCB2	EDNRA	RPS2
ZNF106	FZD3	CREB5	SYT11	GNGT2	DSP	ACKR3	SDC4	COL15A1	CDK6
LDB3	C21orf62	L1CAM	LHX2	TERF2IP	PHGR1	ADM	DDR2	IER3	NACA
HSPB1	METRN	COL4A3BP	DPYSL3	BAZ2B	ACE2	RAPGEF5	GPX3	ZFP36	RPL32
CTD-2545M3.8	RSPH1	ZNF704	GRIN2B	PIK3R1	MT1F	ROBO4	TSPAN4	CXCL2	RPL10
PRDX6	ZIC2	THSD7A	BCL11A	OLFM1	ANXA4	GAS2L3	IL11RA	CTSC	RPL23
MYL6B	BMP7	SORBS2	DLX6-AS1	INA	LGALS2	TACC1		NFKBIA	PARM1
CDKN1A	HSPB8	RAMP1	ZBTB18	STX3	TMEM141	FKBP1A		TPM4	HNRNPA1
CAP2	GALNT10		TRIM2	MAK	C19orf33	HSPG2		EGR1	RPS16
MYOM1	OSBPL1A		ETV1	SNAP25	CTSA	MECOM		IGFBP5	HIST1H4C
SEPW1	WDR96		FAM171B	EPB41	VIL1	CHST1		SLC2A3	PEG10
MIR133A1	ID3		NCAM1	PCAT4	AKR1B10	BCL6B		TXNIP	RPS5
COBL	KCNJ13		YWHAH	DACH1	RARRES1	PRND		COL16A1	RPS11
PDLIM5	ARL4C		CHL1	FAM161A	CDH17	TM4SF18		HSPA5	MEGF10
CSRP3	ZIC4		TMEM132B	LINC00599	LGMN	CXCR4		BOC	RPL30
PDLIM3	ARMC3		DPYSL2	KCNV2	DPP4	SLC4A7		FAM114A1	RPL3
RBM24	HTR2C		MEIS2	PCLO	NDRG1	RNF19A		CXCL12	RPS24
BLCAP	MLF1		ELAVL3	H3F3B	S100A10	TP53I11		FTH1	RPL35
CFL2	EDNRB		TUBB	AMER2	CYP3A4	GNAI2		TPT1	RPL29
CAV3	SPAG1		SLC1A2	LHX9	CYP3A5	SULF2		C11orf96	EIF3E
MYOZ1	TPD52L1		PGM2L1	ATP2B1	PERP	LIMS1		P4HA2
CHRNA1	ZFYVE16		TMSB15A	NAPB	GCHFR	FAM43A		ZFP36L1
ATP2A1	TTC18		CSRP2	SIX3	CLDN2	ADAMTS5		SELM
CHRND	C5orf49		DNER	TPH1	ABCC2	LUZP1		TBX3
TUBB6	TNC		PPP2R2B	CCDC181	IFI30	PLK2		PDGFRB
MYOT	MPC1		RTN3	IMPG1	CLDN7	ITGA5		CAPN6
FNDC5	MRPS6		C14orf23	SYT4	CPS1	PCDH12		FSTL1
TXLNB	NFIA		NFIB	DAAM1	ARID3A	MYO1B		TGFBR3
XIRP2	DNALI1		SRI	SIX6	LAMB3	NOTCH4		TGFBI
LMOD2	GRAMD3		TTC9B	GADD45G	CDX2	TM4SF1		TGFB3
ATP1B4	FAM183A		ID2	SRRM3	ANPEP	MLLT4		TNFAIP6
TEAD4	CDH2		PKIA	APLP1	SI	FLT1		EMILIN1
APOBEC2	IQCG		APC	ZNF326	ALDOB	ARHGEF28		KLF4
COL19A1	MORN2		FAM49A	ANK3	ANXA13	AKAP13		PPIB
UNC45B	PTGDS		PRKACB	CABP5	CCL25	SPTBN1		KDELR2
CACNG1	EFNB3		TRIM9	ATP1A3	GLS	SLC12A2		TRIB3
HSPB2	ITM2B		SLA	NLK	APOA4	ICAM2		ADAMTS1
ALDOA	CCDC146		CELF2		CD68	PHLDA1		CDH11
CACNB1	NR2F1		YWHAE		GPX2	PPM1F		CTSK
C1orf105	DKK3		CXADR		EDN1	FSCN1
RYR1	EFEMP1		SEPT3		CYP2W1	MYH10
SLC25A4	GRM8		SCRG1		CTSB	TCF4
FXR1	C11orf88		KIF1A		SLC9A3R1	ITGB1
FABP3	ITM2C		ARHGAP21		NEU1	KIAA1462
SMYD1	ALDH9A1		TMEM161B-AS1		SLC26A2	CRIP2
GAMT	PLA2G16		FUT9		PRSS8	NID1
SIX1	SULF1		FXYD6		F2RL1	PTPRM
LRRC39	C1QTNF5		SOX9		G0S2	FAM101B
SYNPO2L	CCDC170		ATAT1		VAMP8	ZEB1
PDLIM7	DRC1		RAB31		GSTO1	LYVE1
FLNC	MSI2		GDI1		USH1C	C10orf10
MSTN	TPPP3		KIAA0408		ATP1A1	MGLL
MYL5	CD9		SPECC1		UGT2A3	CDC42BPA
DMD	ATP1B1		WASF1		CEBPA	MSN
PGAM2	GJA1		CALM3		GALNT1	ACVRL1
FGF7	CASC1		SEPT11		MFI2	MACF1
AGL	CYSTM1		FNBP1L		AKR1C1	SMAD1
CLSTN2	CMC2		TSPAN7		PYY	ARHGDIB
NPNT			SCD		CDHR5	ANKRD11
RASSF4			YWHAG		DSG2	DOCK9
WIPF3			C4orf48		DGAT1	DYSF
COX6A2			VAMP2		SLC39A5	JAK1
YBX1			GNPTAB		SUCLG1	PREX2
MYOM3			IDI1		GIPC2	DOCK4
ASB5			WDR47		ZFP36L2	MIDN
LINC00882			CAMKV		FCGBP	LAMB1
SRL			CORO1C		CHP2	MYL12A
MAP3K7CL			DYNLL1		GPR160	S100A16
TRIM63			SMS		CDH1	VASH1
TMEM182			MAPRE2		MACC1	ITGA1
JPH1			TUBA1B		ABCB1	CRIM1
EIF1AY			GPR56		AGR3	UBALD2
RGS2			YWHAZ		MEP1A	SOX17
PFKM			SCRN1		INSIG1	KITLG
ATP2A2			CENPV		CFI	HIF1A
EHBP1L1			NSG1		AMN	PRRC2C
FBXO32			ROBO2		NR1H4	KLF2
SBDS					DHRS7	RNASE1
CACNA2D1					FAM13A	RASSF2
HIPK3					CTSV	DGKH
RTN4					GNS	BMP2
CYB5R1					GBP3	ECSCR
KATNBL1					TMEM45B	DIAPH2
SETD7					SUCLG2	DUSP1
SYNPO2					C1orf115	CD99
					MLEC	MAST4
					CORO2A	CREM
					HPN	CCDC85B
					AGPAT2	RPS6KA2
					CLCA1	TMSB10
					ACSL5	TSPAN18
					GCNT1	CDK17
					TDP2	PHLDB2
					LRRC19	WFS1
					AKR1C2	ELK3
					SMIM22	LMO2
					TMEM256	SEC14L1
					STARD10	IQGAP1
					CYBA	RHOC
					GRN	C8orf4
					KRT15	AHNAK
					LAMC2	JMJD1C
					SLC39A14	LAMC1
					SLC5A12	NRP1
					SLC20A1	APOLD1
					SLC46A3	UNC5B
					ASS1	F2RL3
					FCGRT	PHACTR2
					HLA-DRB1	VWF
					PDLIM1	HOMER3
					KHK	EIF3A
					QPRT	CAV2
					EPSTI1	RASIP1
					FAM46A	RAI14
					SLC17A5	DOCK6
					S100A9	CLEC14A
					TMEM144	RAMP2
					PTPRF	CDC42EP3
					LPGAT1	MYADM
					FGB	SH3PXD2A
					HSD17B11	GRK5
					ST14	CXorf36
					MST1	ABLIM1
					KRT13	RAB13
					ERO1L	FAM129A
					UGDH	SLC38A1
					DDC	INHBB
					SLC25A5	GYPC
					GLA	ERG
					SERPINB1	ROCK2
					MMP7	PTPN12
					MARVELD3	PHF10
					DSC2	FRMD4B
					CLIC1	LAPTM5
					SULT2A1	KCNN3
					REEP6	CTNNB1
					TMC5	HOXB7
						MYCT1
						RGS3
						PNP
						YES1
						ROCK1
						SLFN5
						N4BP3
						DLL4
						ITPKB
						HDAC7
						ARHGAP25
						STAB1
						PDGFB
						PRKD2
						PLEKHG1
						SVIL
						SHANK3
						GMFG
						NOTCH1
						PEAK1
						GJA4
						KIF5B
						NRIP1
						EMCN
						PPFIBP1
						SIPA1L2
						GRPEL2
						SMTN
						PFN1
						ITSN2
						TSPAN14
						PODXL
						VIM
						FAM89A
						KANK3
						CSRP1
						ECE1
						CFLAR
						OGFRL1
						TMOD3
						TGFBR2
						SFPQ
						CAST
						EPAS1
						HERC1
						FMNL3
						SNRK
						SMC4
						VAMP5
						RHOJ
						RBM25
						TPR
						CDC37
						NOM1
						SLK
						FNDC3B
						SOX18
						EIF4G2
						BAX
						ODF2L
						SH2B3
						SP100
						LPP
						SOD2
						HSPA12B
						THBD
						ACTR2
						FAM213A
						AC011526.1
						KTN1
						PTPN14
						TIE1
						EHD4
						ITPRIPL2
						RASGRP3
						DYNC1H1
						MYL6
						LOX
						CLIC4
						SVIP
						ANGPTL4
						BCAT1
						NIN
						NDST1
						KIF13B
						PPP1R18
						SEMA6B
						SNX9

## Sheet: Non-cell type specific genes
c1 (23 genes)	c2 (15 genes)	c3 (27 genes)	c4 (32 genes)	c5 (19 genes)	c6 (35 genes)	c7 (49 genes)	c8 (24 genes)	c9 (32 genes)	c10 (12 genes)
TNNT1	CLU	CHGB	GAP43	SYT1	CHGA	KLF6	CTGF	MGP	NEB
KLHL41	PCP4	CHGA	STMN2	BEX1	SEPP1	IGFBP3	LUM	LUM	KLHL41
NEB	S100B	STMN2	SOX2	CADM1	FTL	MCAM	THBS1	MFAP4	SGCA
MEF2C	CST3	CCND1	GPM6B	CHRNA3	NEAT1	AFAP1L1	COL14A1	COL14A1	MKI67
NES	MGST1	GAP43	MLLT11	NEFM	SPINT2	HLA-A	ELN	BGN	TNNT1
CRYAB	SOX2	ELAVL4	MEF2C	NEFL	GDF15	LAMA4	MGP	H19	LGALS1
FILIP1	ID4	S100B	STMN4	CHGB	SLC40A1	TNFSF10	SERPINE2	SERPINE2	RPS25
NEFM	RBM47	SCG2	MAP1B	DST	KLF5	FILIP1	PRRX1	IGF2	CDKN1C
AFAP1L1	GPM6B	DST	TMSB4X	PCP4	ERBB3	B2M	S100B	PRRX1	IGF2
PMAIP1	NELL2	BEX1	CALM1	CKB	MSMO1	NOV	PRSS23	FTL	SCN9A
SEPT4	CRYAB	STMN4	NRXN1	SEPT4	MGST1	EMP1	SLC40A1	LGALS1	TOP2A
H19	ITGA6	SCN9A	EZR	PPFIA2	RBM47	A2M	PCOLCE	FOSB	CDH15
ERBB3	EZR	NOV	SCG2	BEX2	ETS2	ITGA6	MMP2	PCOLCE
SGCA	APLP2	UCHL1	KIF5C	CHD7	HLA-A	PRSS23	BGN	CTGF
GAPDH	RAB11FIP1	CHRNA3	KIF21A	KIF5C	MME	MAF	MFAP4	MMP14
GDF15		CADM1	MSMO1	MAP7	CTSD	HLA-C	FOS	ANXA1
IL32		MAP7	ELAVL4	MAP1B	RAB11FIP1	ETS2	JUN	IGFBP3
LRRFIP1		SYT1	CST3	STMN2	DAB2	CCND1	DAB2	A2M
CDH15		KIF21A	UCHL1	NRCAM	IL32	JUP	RPS25	CALD1
KLF5		MLLT11	EFNB2		HLA-C	TPM3	SPINT2	LAMA4
TPM3		ANK2	CAMK2N1		MYO6	ACTN4	CTSD	FOS
PALMD		NEFM	ANK2		MAF	EFNA1	MMP14	MMP2
CDKN1C		MCAM	PPFIA2		CHGB	MME	SOX5	SEPP1
		NEFL	SOX5		KLF6	SCN9A	ID4	IFI16
		ERBB3	ID4		EFNA1	APLP2		S100A11
		BEX2	CKB		TUBA1C	NES		JUN
		NRXN1	IGFBP2		TNFSF10	PMAIP1		ATF3
			NRCAM		CD2AP	CALD1		WWTR1
			CLU		ACTN4	TMSB4X		ELN
			NELL2		GAPDH	CALM1		IL8
			TOP2A		B2M	CD2AP		EMP1
			SYT1		S100A11	IFI16		P4HB
					CAMK2N1	LRRFIP1
					P4HB	DAB2
					JUP	IL8
						THBS1
						ATF3
						MKI67
						IGFBP2
						CHD7
						ANXA1
						FOSB
						PALMD
						WWTR1
						MYO6
						TUBA1C
						NEAT1
						EFNB2
						JUN
