# Supplementary material for: Data integration of bulk and single-cell transcriptomics from cerebral organoids and post-mortem brains to identify cell types and cell type specific driver genes in autism
Source: Research Square preprint supplement (doi:10.21203/rs.3.rs-113869/v1), 2020-12-02
Supplement: Supplementary file 14 [file c455291f2f432920041ce2f1.xlsx]

## Sheet: 16p11.2 SetP
									FPKM in ASD probands with 16p11.2 deletions									FPKM in controls without 16p11.2 deletions
Cytogenetic band	AccessionID	EntrezGeneID	Gene	GeneName	FoldChange	log2(FoldChange)	P	FDR	14758.x3_1	14758.x3_2	14758.x3_3	14799.x1_1	14799.x1_2	14799.x1_3	14824.x13_1	14824.x13_2	14824.x13_3	902_1	902_2	902_3	PGP1_1	PGP1_2	PGP1_3	GM23716_1	GM23716_2	GM23716_3	GM23720_1	GM23720_2	GM23720_3	GM25256_1	GM25256_2	GM25256_3	BYS0110_1	BYS0110_2	BYS0110_3	BYS0111_1	BYS0111_2	BYS0111_3	BYS0112_1	BYS0112_2	BYS0112_3	BXS0114_1	BXS0114_2	BXS0114_3	BXS0115_1	BXS0115_2	BXS0115_3	BXS0116_1	BXS0116_2
11q21	NR_002569	619383	SCARNA9	small Cajal body-specific RNA 9	0.711683	-0.490694	8.65654e-12	8.63749e-08	38.1087	33.901	27.3008	43.3281	37.1929	27.4195	26.9937	56.3756	71.8356	109.855	96.7617	122.225	107.707	100.156	127.086	109.949	144.884	125.381	107.283	135.754	144.436	123.988	76.5868	100.157	122.189	137.467	123.915	87.4342	69.5318	121.252	103.957	111.565	116.742	69.7205	40.3994	82.2442	56.035	74.4432	53.0777	65.1677	53.0501
12q21.31	NM_182767	55117	SLC6A15	solute carrier family 6 (neutral amino acid transporter), member 15	0.541246	-0.885644	3.92426e-11	1.95781e-07	1.3999	1.37115	1.36221	1.14877	1.16602	1.70414	1.63403	3.18075	1.56035	3.62493	3.46158	3.04843	3.10002	3.22474	3.96927	5.70189	5.59856	4.23031	2.96478	3.52292	3.75485	2.62218	2.59833	3.30797	6.42347	4.57651	4.7102	4.74497	3.46015	11.64	2.914	3.29124	2.93266	3.85874	3.68168	3.40754	2.95357	2.67478	3.96538	2.15397	2.18006
3q21.1	NM_006810	10954	PDIA5	protein disulfide isomerase family A, member 5	1.7672	0.821462	3.50295e-10	1.16508e-06	5.71999	10.654	18.4224	11.8486	15.293	10.9657	6.89691	5.65506	16.6285	6.28506	7.26104	6.06507	5.68308	8.13699	8.19703	2.94607	2.94069	2.5079	5.75657	5.30364	4.99308	5.81926	6.13277	4.31158	5.48508	5.88204	5.16764	2.0781	2.76908	3.44403	5.7355	5.38104	4.16759	7.45151	5.61167	5.61588	4.1911	2.51828	3.18582	2.72373	2.72687
14q23.2	NR_045406	100750247	HIF1A-AS2	HIF1A antisense RNA 2	0.404822	-1.30464	5.63673e-10	1.40608e-06	0.740751	4.06285	2.54315	1.28082	1.83421	5.19401	0.646723	1.95877	10.5579	9.9099	7.83458	6.78187	10.5515	11.3924	10.5773	7.5626	7.09596	7.35927	6.39216	7.3432	6.89681	6.95317	9.13615	9.98454	8.77304	8.54222	8.43335	8.64292	6.13874	5.96105	5.87229	6.84106	6.67423	10.0371	9.54664	11.706	8.07525	6.77084	6.56225	8.38829	8.3302
16p11.2	NM_001145524	83719	YPEL3	yippee-like 3 (Drosophila)	0.612715	-0.706712	9.66934e-10	1.92961e-06	9.18477	8.77798	8.57309	6.65765	6.87622	7.3112	8.93824	5.47904	5.70832	13.8196	15.8311	18.077	13.3435	10.5813	9.35252	18.8544	18.3895	15.8489	19.1311	14.513	18.8112	15.1037	15.709	16.0675	14.4044	16.4708	18.0531	28.29	22.2121	12.7297	17.5071	19.256	16.8427	14.9565	16.9572	11.7916	20.8012	18.2015	20.593	21.9253	22.5488
Xq23	NM_014289	827	CAPN6	calpain 6	2.98472	1.5776	1.30686e-09	2.17331e-06	2.44658	59.0668	2.71258	1.4359	8.31805	9.24816	14.4844	13.7809	4.36959	1.69716	2.20963	1.27424	2.17195	1.29804	3.50122	0.478887	0.089612	0.143153	2.27141	2.41085	2.46731	1.31547	0.778426	0.905127	4.33378	2.34824	2.81814	0.229324	0.348371	1.04981	2.89713	1.51757	1.72566	2.98287	2.53796	1.89199	2.07718	1.26229	1.50985	1.77868	1.38357
5q23.1	NM_002317	4015	LOX	lysyl oxidase	2.21599	1.14795	3.94482e-09	5.62306e-06	3.23314	11.5983	9.5792	10.2105	9.30085	8.69447	2.37547	3.79505	4.14727	3.11596	3.43776	4.0176	1.86736	4.07992	3.12267	1.02515	1.03514	1.46994	2.63002	2.95475	2.19934	2.03305	2.77215	1.60564	4.4252	4.04582	4.01473	1.16844	0.975256	1.78637	4.12944	3.2465	3.44963	3.45078	2.86898	2.58321	1.19776	0.896764	0.903511	1.38826	2.43838
11p13	NM_001033505	1479	CSTF3	cleavage stimulation factor, 3' pre-RNA, subunit 3, 77kDa	0.529477	-0.917361	4.70104e-09	5.72118e-06	1.57304	1.99394	2.32306	2.00628	1.59643	3.84629	2.10783	6.65966	3.24234	9.70402	8.39386	5.05805	5.66415	7.74961	7.37615	7.97508	7.39834	6.72452	6.47202	5.69412	4.85432	4.50726	3.35044	6.57246	4.70641	4.46909	4.86497	4.86274	3.3569	5.35318	8.70035	7.95554	7.38534	4.43142	7.04536	6.84038	5.70607	6.10489	6.90074	4.47248	3.44462
16p11.2	NM_001276275	4150	MAZ	MYC-associated zinc finger protein (purine-binding transcription factor)	0.685366	-0.545053	5.16042e-09	5.72118e-06	23.5262	25.3157	24.6203	19.2997	14.9566	14.2271	24.4857	7.70305	12.2113	43.7782	42.9199	44.0285	27.1789	46.7242	25.2349	32.3901	33.5665	28.6369	30.3516	25.862	28.4574	33.0631	39.7308	26.4731	33.6191	36.2821	41.7859	45.3044	45.9314	30.3386	36.5531	33.9656	30.5271	43.0725	42.4185	32.0966	31.2993	34.4583	34.6673	42.1435	44.0075
13q12.12	NM_000231	6445	SGCG	sarcoglycan, gamma (35kDa dystrophin-associated glycoprotein)	2.35001	1.23267	9.15881e-09	9.13866e-06	0.42165	6.15181	3.2739	2.19511	7.08123	6.64969	2.8983	4.80684	2.21924	0.444092	1.22567	0.764774	2.29881	1.94897	2.19733	0.464094	0.706476	0.460506	0.785601	1.07906	1.08139	1.27845	1.16351	1.05869	2.87374	2.5074	2.33871	0.439022	0.4234	0.560213	1.39958	0.997558	1.39353	5.04422	2.62986	2.84801	1.16948	0.778834	1.23076	0.770166	0.484529
6q13-q14.1	NM_004370	1303	COL12A1	collagen, type XII, alpha 1	2.90011	1.53611	1.28534e-08	1.07674e-05	2.64437	48.4611	9.36954	4.35816	6.19699	8.28785	6.6138	7.37382	22.6489	2.03603	2.53301	1.32176	2.41602	2.53367	2.89647	1.08752	1.09141	1.17125	1.21453	1.03018	0.526576	4.54663	1.76409	4.00165	3.26844	4.58964	3.19025	1.07163	1.44892	2.81877	4.66108	2.38253	3.66451	7.84289	3.31769	5.48064	1.30344	1.3109	1.32169	1.16065	1.33076
8q21.11	NM_014393	27067	STAU2	staufen double-stranded RNA binding protein 2	0.547542	-0.868958	1.29493e-08	1.07674e-05	2.9854	1.65017	3.13068	3.01879	2.2569	3.50731	1.45001	5.81558	3.20879	7.99763	8.41376	8.92769	6.86352	7.5628	4.65357	7.16144	7.33916	8.08707	5.46372	6.27074	4.87715	5.5807	7.74426	6.96438	5.63346	5.30409	3.09471	5.12861	3.40816	5.38437	5.33828	6.45849	6.78981	4.80623	8.06085	9.61963	5.42084	6.35331	7.16404	5.1956	5.91814
1p36.12	NM_003196	6920	TCEA3	transcription elongation factor A (SII), 3	2.10443	1.07343	1.41437e-08	1.08558e-05	1.67391	4.23725	3.48232	2.1676	7.14462	6.25355	6.63944	6.14324	1.66895	2.18066	2.20606	2.43654	2.95002	1.25769	2.14476	0.845303	0.830263	0.83505	1.69447	2.5362	2.50525	1.71207	1.95376	1.88042	2.89881	1.95195	1.52478	0.866876	1.37136	1.7017	3.07017	3.08142	2.18353	1.83043	1.67817	1.97571	1.73417	1.86386	2.31479	1.53387	1.2428
11p14	NM_018362	55327	LIN7C	lin-7 homolog C (C. elegans)	0.694502	-0.525948	1.83937e-08	1.14815e-05	4.14937	9.11194	7.84143	7.93993	7.49322	11.6915	6.57486	12.6445	11.0976	17.396	16.2877	15.0975	14.1664	15.8035	13.5586	25.0226	24.8657	23.2343	11.374	13.6112	14.5075	12.6561	14.1851	16.9436	16.1764	14.3824	14.8558	9.01025	7.45754	16.152	14.2071	15.1532	12.9006	14.51	17.6414	21.1692	15.4684	14.524	16.2651	10.1907	10.683
17q21.33	NM_016424	51747	LUC7L3	LUC7-like 3 (S. cerevisiae)	0.560102	-0.836239	1.81863e-08	1.14815e-05	2.09528	4.25449	3.59298	2.76108	3.16224	6.26016	4.85905	7.57271	5.47959	6.82507	5.60156	6.47601	10.2531	8.43598	15.5081	10.2135	14.9011	16.2331	10.3424	12.3037	8.19173	13.7849	8.23765	16.1459	8.94539	9.54683	8.47785	6.94858	6.51265	7.17595	10.3501	11.0034	12.1816	6.89529	6.2327	12.9278	9.39516	13.4657	9.79373	5.65357	5.74422
16p11.2	NM_002720	5531	PPP4C	protein phosphatase 4, catalytic subunit	0.715198	-0.483584	1.8411e-08	1.14815e-05	32.1211	23.8642	25.5434	24.6727	17.2886	14.656	19.622	8.44221	26.5966	44.5308	42.5209	39.2432	27.7415	46.7753	29.557	30.4657	29.0612	30.0688	43.5528	33.9226	40.2634	31.898	43.6936	27.6735	37.1918	45.5626	51.917	62.6023	57.8145	35.4938	42.8664	40.5075	40.133	48.2025	44.5165	31.8714	37.9969	35.6307	36.8135	51.7649	54.2045
16p11.2	NM_024516	79447	PAGR1	PAXIP1 associated glutamate-rich protein 1	0.594587	-0.750041	2.14075e-08	1.25649e-05	3.42043	4.16332	3.9081	3.376	3.68785	3.64628	4.16108	1.67102	3.67343	6.40298	6.84766	6.49021	6.41844	7.76283	7.31779	5.42099	5.32704	5.63508	9.00504	8.2317	9.0762	8.52891	5.24301	7.4271	8.26492	8.64316	8.80573	10.8542	9.56519	5.90343	10.9285	10.2314	10.7016	7.21442	6.34999	6.07598	6.44688	7.89164	5.90286	5.9465	6.91677
1q32.2	NM_015714	50486	G0S2	G0/G1switch 2	2.06591	1.04678	2.7985e-08	1.46647e-05	2.5299	11.8973	46.6383	31.3224	14.9532	9.92449	2.48347	1.96059	4.14475	2.38726	3.32585	4.59716	3.54188	5.90015	3.63706	0.595599	0.329211	0.489956	2.75556	3.52139	2.8105	1.08151	2.31749	2.11473	3.93316	3.43903	4.71965	0.817163	1.48702	0.642294	9.1367	5.98169	7.16672	5.60767	8.37567	3.2972	6.4383	1.78201	3.38757	2.85765	1.71596
16p11.2	NM_173618	283899	INO80E	INO80 complex subunit E	0.667503	-0.583154	2.9394e-08	1.46647e-05	8.67896	8.60478	8.18862	7.35194	5.30773	4.16822	6.92672	3.83718	5.76403	13.8862	13.1283	12.6553	11.7249	15.1538	8.52795	12.0742	11.7713	11.1789	11.3962	8.75117	9.30553	12.0332	12.2937	10.8027	10.351	10.5319	13.2257	13.3172	13.2337	8.04825	10.6545	13.473	12.268	11.946	13.9573	8.84422	10.3571	10.6445	11.29	13.0588	13.4657
6p24.2	NM_001100829	100113407	TMEM170B	transmembrane protein 170B	0.553281	-0.853915	2.92655e-08	1.46647e-05	1.32372	2.10522	1.74905	1.56023	1.67872	2.60639	2.18668	3.70895	1.19352	4.88281	4.95323	4.84718	3.48131	4.55182	3.53494	8.80513	8.77251	7.33435	2.96926	4.0877	3.82575	4.58416	5.21626	5.85179	2.98953	2.68881	2.92292	2.36249	2.35496	5.95991	3.88667	4.67	4.36072	3.14684	4.33026	5.65921	5.50787	4.89944	5.2125	2.82434	3.01048
16p11.2	NM_031478	83723	FAM57B	family with sequence similarity 57, member B	0.420006	-1.25152	3.26731e-08	1.55244e-05	6.56987	2.47726	1.56172	1.65664	1.38717	1.43147	6.44566	3.44616	0.335134	5.5363	5.50597	6.13667	4.09178	5.55483	3.83949	10.645	10.7558	14.4813	6.91153	6.21424	6.85769	8.82483	11.1632	7.96642	4.25591	7.02205	9.42058	10.5227	9.71826	3.51563	6.71014	6.50791	7.71413	5.67756	10.9403	7.70059	4.66519	6.82841	3.95316	6.74242	10.5264
21q21.1	NM_001338	1525	CXADR	coxsackie virus and adenovirus receptor	0.653523	-0.613689	4.2649e-08	1.85423e-05	5.4472	8.54947	10.3662	7.92128	9.22588	15.3692	7.04572	15.5876	10.3869	17.7794	18.8071	19.5879	14.4344	18.7274	13.1597	36.4519	35.5813	30.8785	12.9658	15.5438	14.8933	18.8381	25.0866	24.5306	17.3104	15.4631	15.8758	13.9539	10.3642	25.4995	17.1047	19.1231	15.4541	16.9879	23.6595	24.0183	24.9423	24.6296	28.783	15.7232	13.5232
16p11.2	NM_178863	253980	KCTD13	potassium channel tetramerization domain containing 13	0.498161	-1.00532	4.27414e-08	1.85423e-05	4.04139	2.13113	1.43259	1.29211	1.31221	1.42734	2.94828	2.27259	0.800747	4.07265	4.74708	5.6422	2.64246	2.90596	2.43598	12.1029	10.963	13.7958	2.75456	2.11275	2.63907	5.56053	7.31385	5.70702	4.01639	4.39934	4.79963	6.94878	5.85496	2.91779	4.48786	4.9	4.34469	3.97023	4.0688	3.10994	5.15727	5.37804	4.92178	5.53883	7.1814
6p24.3	NM_030810	81567	TXNDC5	thioredoxin domain containing 5 (endoplasmic reticulum)	1.21793	0.284431	5.34781e-08	2.22335e-05	20.0903	73.4971	66.8728	63.5647	76.5243	74.386	23.1673	32.0732	64.8308	34.3567	46.3857	34.0907	45.4336	37.189	42.1988	11.1451	12.2866	10.1381	26.9615	26.4584	29.5003	21.0291	16.744	19.4189	47.5488	48.619	41.3255	14.3936	14.206	30.0868	36.1323	34.1051	28.0102	51.2772	32.9121	35.4254	32.5008	22.7847	29.6935	18.8937	17.6427
14q22.3	NM_002306	3958	LGALS3	lectin, galactoside-binding, soluble, 3	1.81195	0.857541	6.06954e-08	2.3293e-05	18.9518	35.5575	87.0677	120.796	76.7971	51.9329	9.01514	22.7468	37.628	18.2879	19.1884	16.3956	24.1435	20.7438	14.695	4.72294	3.98587	4.28771	9.728	9.02723	8.66992	11.2462	17.2999	11.3518	11.6392	14.0481	17.3624	5.26016	9.58862	4.52959	26.2614	15.5963	16.9336	20.8867	18.8588	16.7388	9.75303	5.31226	5.64277	8.93745	9.76749
11p15.4	NM_145040	112464	PRKCDBP	protein kinase C, delta binding protein	2.82141	1.49641	6.03997e-08	2.3293e-05	10.2239	8.79886	22.2287	21.6964	22.595	13.7447	10.2379	8.33238	21.7456	6.47403	7.52316	4.78809	9.28803	5.40316	6.58193	0.445974	0.502279	0.28038	2.75915	3.17214	3.56166	2.64085	2.47627	2.33737	8.63571	10.5124	12.957	1.94544	2.4033	0.808531	7.56648	4.44079	4.46941	10.418	4.5552	2.54313	3.29296	1.02707	1.47388	3.69629	2.62034
11q12.1	NM_001300727	23220	DTX4	E3 ubiquitin-protein ligase DTX4 isoform 2	0.654383	-0.611794	7.98195e-08	2.84442e-05	10.2659	4.88677	6.56771	7.16098	6.41499	5.55903	4.93643	4.01661	2.98794	8.95474	10.921	9.26122	9.76815	13.5798	7.65218	15.5872	18.2012	16.3865	10.1676	11.2826	11.85	15.0592	12.8178	13.2048	9.05005	9.40372	9.67183	10.3316	8.09246	9.3938	9.87089	9.12222	9.24833	9.65101	8.20677	10.3698	9.13386	12.3921	9.07723	7.42825	7.85511
Xq26.2	NM_004484	2719	GPC3	glypican 3	1.32798	0.409232	7.93609e-08	2.84442e-05	50.1023	212.361	155.089	140.044	106.582	96.9867	59.5266	81.5138	73.6454	53.6618	54.68	34.4451	39.3663	42.586	75.4334	8.29882	8.48765	9.1913	29.5221	33.7376	35.0813	21.11	14.9912	19.6383	46.5791	37.6766	48.3733	9.34656	12.1133	31.2946	47.354	41.186	43.3478	106.733	73.8559	69.2608	108.706	93.3416	103.53	47.9832	40.2386
8p22	NM_016353	51201	ZDHHC2	zinc finger, DHHC-type containing 2	0.630408	-0.665642	9.30371e-08	3.20112e-05	2.4726	3.8377	3.88569	2.70007	2.52327	3.7477	2.16752	3.72718	5.3855	7.79727	7.60983	8.34839	5.62588	5.89177	5.52364	7.23624	7.37413	6.43381	7.15171	7.43672	7.52769	6.03086	7.65249	6.8535	3.82297	3.70186	3.76896	4.17523	3.52714	8.67588	6.08354	6.62759	5.2054	4.95925	5.89598	6.07804	9.33226	7.824	9.30189	5.9932	4.97043
3q25.22	NR_003001	677767	SCARNA7	small Cajal body-specific RNA 7	0.919836	-0.120552	1.15584e-07	3.84431e-05	556.649	439.365	309.101	251.789	386.31	411.899	507.771	502.665	636.958	680.016	540.621	801.938	479.413	599.308	489.351	606.59	809.153	768.447	400.951	433.404	419.754	647.372	452.567	613.359	373.457	420.698	408.225	1005.61	905.988	740.881	592.906	525.882	658.613	451.842	396.857	440.239	491.787	572.295	431.244	530.925	627.746
8q21.3	NM_018710	55529	TMEM55A	transmembrane protein 55A	0.734502	-0.445161	1.29032e-07	4.15315e-05	3.21611	4.55254	5.12916	4.90705	4.58483	4.26827	4.66113	5.95368	5.81096	5.19742	6.09141	6.42333	6.31693	7.59289	7.393	10.2746	9.64863	9.3174	9.7606	10.1226	11.9339	6.81782	7.89802	8.36668	5.92237	5.39881	5.37402	6.93564	4.70577	8.35595	7.1911	7.80638	7.17242	6.92774	8.36419	8.50133	9.62926	9.55121	9.30457	6.89407	6.02698
1p32.1	NM_002353	4070	TACSTD2	tumor-associated calcium signal transducer 2	3.94669	1.98064	1.34284e-07	4.18716e-05	0.036631	0.662773	21.4883	14.3855	10.4146	8.33132	0.465191	0.117408	59.2976	0.694567	1.20472	0.929717	0.171072	0.029887	0.065997	0	0	0.025719	0.505752	0.468544	0.331991	0.060589	0.032503	0.030668	0.2737	0.275482	0.501017	0.308964	0.220778	0.235821	0.625043	0.139214	0.16502	1.00305	0.661307	0.365226	0.175918	0.055342	0.213966	0.248184	0.137891
14q24.3	NM_006029	9240	PNMA1	paraneoplastic Ma antigen 1	0.726727	-0.460515	1.43191e-07	4.32959e-05	21.7186	18.6121	13.7948	13.4998	14.3196	17.684	16.7115	14.6416	10.2293	26.6262	32.8676	34.9885	21.8554	26.4019	17.0071	38.5839	39.626	41.9451	20.5257	18.9895	20.6744	35.2976	36.5033	33.0216	21.5186	21.1286	21.0242	27.0178	23.2406	28.7909	24.9181	27.6245	25.456	21.1162	25.6426	24.9832	32.5487	34.2316	32.4448	18.0597	19.9771
2q33.1	NM_173822	285172	FAM126B	family with sequence similarity 126, member B	0.68639	-0.5429	1.53259e-07	4.49771e-05	0.900851	1.84226	1.17284	0.911225	1.0433	2.02533	1.38453	2.26124	2.01527	3.11825	3.25815	3.1998	2.58032	3.05439	2.98132	4.72937	4.94395	4.34735	1.80602	2.37532	2.10721	2.91279	3.04518	3.82561	2.24593	2.17072	2.20666	1.65464	1.42023	2.78632	2.18505	2.59157	2.55593	2.19002	2.44659	3.16371	2.47414	3.00488	2.47151	1.38825	1.5705
12p12.1	NM_018638	55500	ETNK1	ethanolamine kinase 1	0.630355	-0.665763	2.00033e-07	5.70266e-05	2.36474	5.2065	4.75118	4.61107	4.3514	6.23578	2.21819	6.29016	4.98649	6.29718	6.81332	6.49367	10.4108	8.68224	8.98839	9.64666	10.2374	8.63789	6.32107	7.35647	7.57997	8.51146	11.7243	11.7212	7.94311	6.70991	7.30943	5.96433	4.45414	11.0789	8.19461	8.13657	7.33669	8.73547	10.0062	12.1273	11.6588	11.488	12.1205	6.86555	6.20856
1p36.33	NM_006983	8510	MMP23B	matrix metallopeptidase 23B	2.38409	1.25344	2.2979e-07	6.36902e-05	3.78332	6.91173	11.3688	9.06658	7.37135	2.78246	3.92134	2.18477	5.65129	1.53646	2.03741	1.70662	3.24221	2.74945	3.22666	0.258894	0.188999	0.455322	1.43985	1.53629	1.63219	1.20592	0.743122	0.89705	3.88138	5.49417	5.22693	1.61027	1.48248	0.596687	4.1395	3.68551	3.88917	3.84354	3.0308	1.92298	1.36394	1.0297	1.50246	2.67164	1.27836
18q12.1	NM_001191324	51444	RNF138	ring finger protein 138, E3 ubiquitin protein ligase	0.346486	-1.52913	2.43542e-07	6.56773e-05	0.000124	1.73702	0.908398	1.61526	2.04411	3.21749	0.839967	1.86613	0.000185	11.4802	10.6713	11.387	7.4219	8.75815	6.99976	5.69217	5.24099	2.85607	4.04913	3.57818	3.82793	5.53845	9.34771	8.01994	2.48647	2.87296	3.30033	3.04113	3.25486	7.85576	5.10693	6.38182	6.63476	6.02662	6.98213	9.71243	7.93376	7.73237	8.51793	3.16791	6.1838
1p36.13	NM_153213	128272	ARHGEF19	Rho guanine nucleotide exchange factor (GEF) 19	2.1755	1.12134	2.8956e-07	7.40827e-05	3.71043	6.03816	4.18945	4.35392	3.25091	2.56975	2.83134	1.44687	4.74586	2.10903	2.08	1.4817	1.44295	2.39075	1.91037	0.73953	0.659146	0.736999	1.56446	1.40446	1.40701	1.11053	0.866844	0.633788	2.38611	2.69011	2.88456	1.67023	1.71724	0.897862	1.66527	1.68751	2.30828	3.06476	1.862	1.82648	1.126	0.792629	0.665864	1.34826	1.37994
5q33.3	NM_001037333	26999	CYFIP2	cytoplasmic FMR1 interacting protein 2	0.721319	-0.471291	2.83319e-07	7.40827e-05	10.7711	9.76655	8.97091	5.59957	9.56621	11.7924	13.9476	9.06009	9.11174	13.1476	16.7446	16.4664	10.6742	10.4402	9.79265	24.4245	25.4763	26.3631	14.827	13.9058	16.0083	17.7704	15.9004	14.9122	15.185	15.694	16.2414	16.8475	17.1171	24.8437	14.1678	17.0528	15.5324	14.9625	17.8295	13.5486	16.1309	19.3269	18.1261	11.5071	10.8408
15q21.3	NM_015617	26108	PYGO1	pygopus family PHD finger 1	0.677502	-0.561703	3.34002e-07	8.33167e-05	1.71759	5.40817	4.23652	2.94208	3.67211	5.83626	2.05593	3.28097	3.84678	6.70308	6.59389	5.66544	6.17424	4.84585	6.10732	8.00926	8.23554	7.02709	5.6239	6.40496	6.18421	5.85986	5.87663	7.44561	6.12441	4.98458	5.12056	4.00141	3.43714	9.02086	5.85111	6.68093	5.95384	6.0419	7.32025	8.26863	5.68277	5.92997	5.53831	4.01009	3.70668
3q27.1	NM_001023587	10057	ABCC5	ATP-binding cassette, sub-family C (CFTR/MRP), member 5	0.654217	-0.612159	4.06647e-07	9.89639e-05	1.50111	2.16731	1.32917	1.3252	2.20112	3.17457	3.22661	5.06182	2.47452	3.92837	3.94989	4.74727	5.13811	4.0128	3.63313	8.53653	10.7646	8.42698	3.83264	3.71554	4.19118	6.75105	3.03662	4.63161	5.16785	3.82227	3.49771	2.98598	2.44681	6.18417	3.19465	3.32858	3.97319	4.22759	4.11604	3.883	3.96392	4.32814	4.76522	2.38207	2.35557
9p22.3	NM_178566	340481	ZDHHC21	zinc finger, DHHC-type containing 21	0.651399	-0.618387	4.50189e-07	0.000106952	1.2046	1.9017	1.16329	1.05924	1.38744	2.17373	1.28577	2.46366	1.85983	2.58416	2.54999	2.87744	2.80789	3.12674	2.5117	5.55365	5.34443	4.25634	2.03001	2.66629	2.14192	4.38825	5.18494	5.53548	2.29821	2.14496	2.0342	2.57175	2.00062	4.76547	2.41171	2.84348	2.45187	2.58874	3.07611	3.37537	3.6546	3.62642	3.72842	2.37575	2.2514
11q13.1	NR_002819	378938	MALAT1	metastasis associated lung adenocarcinoma transcript 1 (non-protein coding)	0.786135	-0.347151	5.01735e-07	0.000116426	54.4868	135.963	68.9413	47.4048	49.9201	101.482	84.6818	87.218	274.499	191.445	132.661	154.623	189.488	141.29	339.326	124.565	226.289	245.616	188.219	227.763	185.001	368.728	168.272	365.466	167.197	164.108	157.533	165.524	147.323	185.244	223.072	272.527	343.022	164.934	155.639	391.433	206.341	372.749	181.174	93.2039	111.216
3p21.1	NM_003157	6787	NEK4	NIMA-related kinase 4	0.740171	-0.43407	5.72525e-07	0.000129833	2.88694	4.06012	4.30005	2.92777	4.46517	6.04523	3.71448	5.56742	5.92114	6.86784	7.86439	7.42199	9.22436	7.8009	6.95625	10.4939	9.82601	8.7148	5.95029	6.82238	6.48545	6.73279	6.27775	6.58022	7.29001	6.00488	6.2653	3.81045	3.35581	8.53445	5.62831	5.89163	5.1435	6.41662	6.15135	7.91612	8.00367	6.93942	8.69795	3.78766	4.14656
22q12.1	NM_005080	7494	XBP1	X-box binding protein 1	1.0972	0.133827	5.93234e-07	0.00013154	35.9322	59.4196	83.0293	75.9937	63.3592	56.5564	36.4676	50.2363	61.7653	67.4704	62.9692	50.4782	47.9138	52.311	41.9162	24.091	21.1738	20.4816	45.2885	34.1048	49.5029	30.0229	31.3582	32.0907	54.6522	55.4568	50.6656	22.6358	27.0024	33.2771	44.711	46.4103	43.0311	56.1453	37.6998	45.2525	41.217	29.0284	34.3274	35.2805	32.8057
1p36.33	NR_002946_dup1	8511	MMP23A	matrix metallopeptidase 23A (pseudogene)	2.24475	1.16656	6.10018e-07	0.000132186	3.16151	5.97147	8.92863	8.59367	6.00285	3.22304	3.24102	1.55806	4.82748	1.33413	2.09424	1.72114	2.44497	2.7925	3.33616	0.262386	0.157526	0.39555	1.20516	1.324	1.28038	0.931259	0.831318	1.25567	4.49589	5.10904	4.71615	1.36333	1.7415	0.518589	3.77004	3.55441	4.63556	3.55129	2.00278	2.00747	1.91958	0.92377	1.23024	2.39608	1.23065
16p11.2	NM_145239	112476	PRRT2	proline-rich transmembrane protein 2	0.411574	-1.28078	6.22642e-07	0.000132186	4.90792	2.41294	1.22661	1.07104	1.91038	3.08135	8.54792	2.73481	0.016518	6.64973	6.67304	8.73253	4.90705	3.23108	4.14896	14.8036	13.2609	15.4051	6.65693	3.1169	3.11091	13.3157	10.7564	10.3483	7.02226	6.73914	7.64195	15.4466	9.58774	6.54349	9.11636	9.28959	11.3321	5.27538	8.16177	7.06662	7.64039	11.1055	8.50778	6.48693	9.118
5q13.3	NM_015566	26049	FAM169A	family with sequence similarity 169, member A	0.664781	-0.589048	6.6367e-07	0.000137961	1.86914	3.4822	2.43058	2.67382	2.19062	3.27842	2.71355	4.63904	3.60054	6.4984	6.20894	5.79515	3.62946	4.84722	3.775	10.2166	10.0871	8.72563	6.61054	7.35361	7.42459	5.45739	6.2185	5.82265	4.25244	3.80367	3.37841	3.14125	2.18517	3.68259	3.48098	5.15766	4.29079	4.38605	5.32714	6.33011	4.78629	4.98143	5.40912	4.23523	4.07286
12q23.3	NM_031302	83468	GLT8D2	glycosyltransferase 8 domain containing 2	1.78639	0.837048	7.75657e-07	0.000157949	2.48828	20.8586	5.51904	4.32625	10.9562	12.391	4.40192	6.40735	3.00438	2.40616	1.79892	1.66423	6.35173	5.92354	5.40449	1.28752	0.922535	0.54416	2.33343	2.89623	3.86588	3.03603	2.60563	4.1659	8.01967	6.71701	7.71481	2.21718	1.7617	3.30155	4.46703	3.44225	2.97747	7.24184	4.54021	4.75757	2.70295	1.47926	2.50126	3.11791	2.07218
8p22	NM_181723	286097	MICU3	mitochondrial calcium uptake family, member 3	0.683481	-0.549026	8.18074e-07	0.000163255	1.17118	1.54926	1.24769	1.17086	1.58102	1.97667	1.42535	3.39984	1.34557	2.66106	2.72188	2.58553	2.48987	3.10703	2.07259	6.93296	6.99721	5.89764	2.11082	2.09355	2.98256	3.17894	4.87496	5.18135	2.38794	2.07683	1.8821	2.41858	1.93144	3.56706	1.8851	2.02907	2.076	2.38356	2.95804	3.48801	3.27178	2.88755	3.0317	3.06937	2.69119
11p13	NM_001001391	960	CD44	CD44 molecule (Indian blood group)	2.02632	1.01886	8.66847e-07	0.000169596	1.30613	2.42915	8.4643	6.67532	5.2994	6.51622	2.50806	3.48247	9.21123	3.17811	3.30363	1.59938	1.47748	0.849969	2.29797	0.671314	0.719886	0.733853	1.12307	0.941566	1.71779	1.97179	2.34506	2.69828	2.289	2.42495	2.49559	0.925478	1.27913	2.04171	4.96722	3.56514	3.15783	4.38418	4.16412	5.06386	1.62179	0.692348	1.21749	1.65643	1.43375
11q22.3	NM_153705	143888	KDELC2	KDEL (Lys-Asp-Glu-Leu) containing 2	1.60436	0.682002	9.11709e-07	0.000173576	3.84663	20.9077	15.1005	14.6196	11.7287	11.8937	3.72991	6.53881	16.4265	6.1335	5.15752	3.24021	5.57553	5.74297	9.13002	1.51831	1.44057	1.26222	7.52621	8.92776	8.83187	3.79265	3.71561	4.20317	9.23347	7.88328	7.64491	3.42117	2.86618	5.96439	7.2548	6.48292	6.16683	11.1783	8.79194	9.41456	5.75906	4.50891	5.62343	2.68291	2.79163
Xq28	NM_006013	6134	RPL10	ribosomal protein L10	1.07506	0.10442	9.25321e-07	0.000173576	583.392	792.727	590.964	721.084	691.736	498.354	537.133	498.315	419.943	428.349	420.059	380.69	310.461	430.541	349.664	183.562	162.249	160.006	290.704	239.8	257.372	280.611	361.729	316.626	442.984	500.572	537.923	379.735	432.374	207.845	434.755	389.599	401.703	561.518	453.337	399.186	267.824	207.417	232.245	391.602	360.284
10q21.1	NM_003338	7321	UBE2D1	ubiquitin-conjugating enzyme E2D 1	0.745262	-0.42418	9.39379e-07	0.000173576	5.59856	6.02609	5.55029	4.24169	3.76028	6.2209	4.63715	6.63616	5.90618	11.8886	9.39449	11.1304	7.34363	8.7721	5.68688	12.761	12.3299	12.8767	5.92324	6.04654	5.82567	8.18186	14.3268	9.55826	5.88801	6.21189	5.10034	10.755	7.44637	7.27558	7.22194	7.63148	7.12006	7.3935	8.05917	8.05567	9.01923	8.58969	7.7778	12.4232	11.6683
Xq21.1	NM_032121	84061	MAGT1	magnesium transporter 1	1.21425	0.28006	9.85806e-07	0.000178843	7.03773	28.4596	20.7627	23.7117	19.1223	20.6215	8.15973	16.9075	23.3589	13.7807	15.5502	9.51172	17.1838	14.6322	17.4941	6.58535	6.1156	5.52731	11.2301	12.5781	12.5716	8.95769	10.9205	11.639	16.9738	15.2118	14.9386	5.64468	5.61569	12.7139	14.703	13.8862	11.6767	20.0989	16.117	16.653	12.2048	7.3196	10.88	9.25025	8.90885
14q21.2	NM_017658	54813	KLHL28	kelch-like family member 28	0.64102	-0.641558	1.01448e-06	0.000180606	1.46833	4.30136	2.42329	2.10632	2.9736	4.52969	3.08759	6.12346	4.28238	6.36872	6.421	6.22048	5.79981	6.68436	7.63662	6.76957	7.14006	6.50908	4.54745	6.04232	5.29269	5.12384	5.7426	8.05197	6.70272	5.83988	6.02362	3.24592	2.5792	5.45012	5.82897	6.7967	6.04604	5.97698	6.5556	9.16683	6.73313	6.25986	6.97599	3.3103	3.87752
17q25.1	NM_001242534	79157	MFSD11	major facilitator superfamily domain containing 11	1.41358	0.499354	1.04982e-06	0.000180606	4.04028	5.70088	7.88708	7.53188	6.0437	4.29437	3.53905	4.24491	6.47476	3.54122	4.80502	3.77362	4.14472	4.53882	3.77197	3.1041	2.98177	3.50117	3.75372	2.79381	3.30508	3.55058	3.35169	2.74011	4.11703	4.49846	4.20078	2.80198	2.13708	2.45273	4.12313	4.34878	4.11067	5.38856	4.17789	3.40903	2.86371	2.69443	2.44955	3.47523	2.77382
12q21.1	NM_031435	83591	THAP2	THAP domain containing, apoptosis associated protein 2	0.604106	-0.727126	1.03348e-06	0.000180606	1.61612	2.78619	1.53108	1.35307	2.00881	3.55686	1.61789	3.73839	1.39862	3.04344	2.94154	3.79423	5.05995	3.39602	3.14624	6.41705	6.37893	5.20092	4.17478	4.84835	5.38194	4.58026	6.40565	7.00794	3.08966	2.87137	3.20959	3.17009	2.30166	4.47142	3.7841	4.63602	4.06832	2.7822	4.04222	4.89886	5.98456	5.30939	5.39668	4.12155	4.45911
16p13.13	NM_001424	2013	EMP2	epithelial membrane protein 2	1.50526	0.59001	1.09554e-06	0.000182188	3.86352	6.98749	17.2601	11.1631	10.5751	9.61124	4.70178	2.97064	17.2388	7.41041	8.02718	5.11574	6.22295	4.99925	5.09439	1.56272	1.32867	1.09141	6.04986	5.57062	6.56384	3.8198	3.00606	3.14339	9.47183	8.58695	7.47284	2.78484	2.46092	4.39849	7.48087	6.97265	6.20257	11.9435	6.34813	7.44817	4.57263	3.04288	3.90198	2.69209	2.31839
1q22	NM_003145	6746	SSR2	signal sequence receptor, beta (translocon-associated protein beta)	1.07473	0.103969	1.07786e-06	0.000182188	216.03	248.294	257.936	251.895	251.25	191.432	139.088	187.01	178.944	161.869	158.822	135.91	165.346	151.22	141.149	85.4324	76.7513	74.7872	134.164	118.193	126.258	103.375	121.167	99.1715	166.862	183.008	183.694	141.799	149.366	97.951	165.877	158.223	140.17	191.786	161.681	134.522	105.647	92.371	93.5427	142.865	117.225
12p11.21	NM_139241	121512	FGD4	FYVE, RhoGEF and PH domain containing 4	0.693085	-0.528896	1.14149e-06	0.00018586	1.79056	3.04834	3.15887	2.37175	2.88329	4.21827	3.13585	5.527	4.08433	5.7248	5.67493	4.93311	5.17735	4.90601	5.82769	10.9455	9.86704	9.98546	6.05013	6.89701	5.93523	4.38714	3.96893	5.46778	5.3429	4.44351	5.15653	3.01007	2.45014	4.83552	4.91509	6.14277	5.60941	4.0942	5.50859	5.98192	6.22515	6.45194	6.1862	2.73998	3.03787
3p21.2	NM_006010	7873	MANF	mesencephalic astrocyte-derived neurotrophic factor	1.14837	0.199594	1.17115e-06	0.00018586	17.8838	45.6062	55.3653	52.0002	46.2116	42.1205	33.1129	48.4546	42.9212	26.6271	31.889	21.8762	45.1589	41.3011	41.0356	21.4415	17.3384	17.271	23.5084	23.4759	25.835	14.9248	23.8701	19.1055	33.4319	28.4634	27.3317	14.4638	15.3076	23.4437	28.7775	29.0444	24.3354	35.3778	23.3821	30.0219	34.5327	25.9051	33.1982	29.5851	24.5137
3p21.31	NM_000258	4634	MYL3	myosin, light chain 3, alkali; ventricular, skeletal, slow	2.80879	1.48995	1.17364e-06	0.00018586	1.36645	9.63187	3.78527	4.14704	5.72829	3.83425	18.4361	10.9691	3.75206	2.30094	1.83863	1.15894	1.28056	1.78135	3.18018	0.169661	0.114602	0.191859	1.7086	0.934007	1.27953	1.80686	1.85503	0.913653	2.73927	3.51573	3.01672	2.73047	3.10515	1.42532	2.40181	1.80479	1.89177	4.2199	3.00583	1.44943	0.436492	0.344637	0.265248	1.40376	1.87651
12q24.33	NR_002979	677829	SNORA49	small nucleolar RNA, H/ACA box 49	0.768421	-0.380031	1.19411e-06	0.00018586	1722.44	284.595	166.722	1057.77	1462.21	1439.38	738.381	1049.61	1022.83	2321.46	993.108	1179.14	1072.61	1559.15	1724.92	2237.22	1962.6	2920.01	1635.08	2113.99	1729.01	1888.98	939.994	1827.45	2344.81	2577.8	2113.24	1387.44	1874.02	1816.24	1454.68	1857.7	1754.45	1284.6	1356.43	1841.18	1410.36	1619.06	1335.35	1389.21	1581.03
2p13.3	NM_006857	11017	SNRNP27	small nuclear ribonucleoprotein 27kDa (U4/U6.U5)	0.568763	-0.8141	1.21076e-06	0.00018586	4.17345	6.67016	9.28405	5.65581	5.2699	10.665	1.01798	7.79825	9.51964	15.4498	16.1981	15.9629	14.4754	20.9178	14.8058	15.1719	13.5214	12.3384	10.1771	11.087	11.4334	12.2797	13.3702	12.4378	13.3834	11.7977	13.3978	9.06889	7.15219	15.7492	15.1857	16.7068	13.4084	13.5104	10.6358	19.7915	12.4331	12.6395	14.8388	13.7647	11.8893
16p11.2	NM_184041	226	ALDOA	aldolase A, fructose-bisphosphate	0.867256	-0.20547	1.39368e-06	0.000208597	213.505	187.964	184.754	171.043	205.198	147.8	266.543	135.636	101.104	237.415	273.693	256.435	219.985	431.448	295.1	280.606	277.625	274.332	145.115	127.95	131.06	223.894	241.94	220.165	324.306	346.576	415.228	488.595	393.922	258.01	293.74	272.226	286.381	385.265	366.482	282.408	423.276	367.684	373.714	308.187	326.829
17q24.2	NM_017983	55062	WIPI1	WD repeat domain, phosphoinositide interacting 1	1.3721	0.456384	1.40068e-06	0.000208597	6.07479	11.318	19.5443	13.8904	15.143	14.0245	10.2083	9.99094	28.113	6.69165	7.53812	6.08324	9.3349	9.8149	13.2031	4.64395	4.78894	4.29303	11.0819	11.0726	11.1244	5.94317	3.91014	5.41778	13.0578	9.92238	9.68136	5.58134	4.5064	10.663	10.0225	10.5642	8.19312	14.5848	10.4714	10.2516	6.44415	5.87916	6.37674	5.99341	6.08884
Xp22.2	NM_015507	25975	EGFL6	EGF-like-domain, multiple 6	2.7887	1.47959	1.43893e-06	0.000211142	2.00636	11.1581	14.2958	10.1844	12.4654	15.4862	8.44777	13.5624	7.91404	0.98285	2.24969	1.68026	1.97205	1.30836	4.16936	1.92987	0.861027	0.866058	9.64029	8.74968	8.5888	2.51524	0.852612	2.93064	3.46688	3.52085	2.26262	0.636312	0.744144	1.33405	1.94905	2.13258	1.47707	4.18775	2.55267	1.2369	5.855	5.39161	5.89615	2.29968	3.13227
1p36.33	NM_001039577	81669	CCNL2	cyclin L2	0.748588	-0.417757	1.66074e-06	0.000240157	7.34667	8.06027	8.74621	8.9994	6.90109	8.36345	5.14056	5.43571	17.2568	11.0227	9.5463	12.3617	10.9743	9.47063	8.72077	14.1741	13.6048	15.5986	14.4636	13.1582	11.7654	21.6286	11.4109	15.9292	14.3888	12.8595	8.9856	17.0824	14.4158	19.0624	15.0107	12.7985	15.7618	10.6203	9.53111	10.5693	12.8112	15.2033	13.9738	8.18556	8.85858
5q35.2	NM_030627	80315	CPEB4	cytoplasmic polyadenylation element binding protein 4	0.684798	-0.546251	1.68522e-06	0.000240216	2.49417	4.18308	2.83328	1.77869	3.40419	6.05161	4.21624	5.12819	4.77264	6.51819	6.8996	7.3365	5.10636	4.98208	6.29711	11.6202	12.4212	11.8067	4.86268	4.72781	4.39203	7.11935	6.28713	8.25951	6.03315	4.88138	4.80376	4.77976	3.72953	8.92666	5.59488	6.82612	5.91449	6.07089	6.8877	7.64493	7.13325	7.92621	7.4482	3.75978	3.96845
16p12.2	NM_001164579	730094	C16orf52	chromosome 16 open reading frame 52	0.743006	-0.428553	1.79551e-06	0.000248827	1.32476	2.93485	2.68123	1.98758	2.31546	2.67974	1.19606	2.20019	1.94103	3.58477	4.14402	3.80652	3.11503	3.57805	2.88076	6.0641	5.48323	4.83457	2.66038	2.66532	2.90766	3.81532	4.45894	4.2885	3.52369	3.08401	2.85129	2.42223	2.18666	3.95483	2.98588	3.00559	2.45895	2.91742	3.44869	3.49307	3.55323	3.53128	3.25179	2.58509	2.23602
9q21.13	NM_018339	55312	RFK	riboflavin kinase	0.691493	-0.532214	1.79361e-06	0.000248827	3.98709	6.02699	5.1313	5.62903	5.42782	7.48242	3.97483	8.01771	9.30689	13.8768	13.2256	17.1288	7.74348	9.29023	6.32202	20.9998	21.5338	18.901	8.26955	8.47359	9.26184	9.41579	15.0842	10.3394	7.73779	6.52109	6.67684	7.19039	5.05642	11.3786	10.4552	12.2425	9.83213	8.33272	9.54716	11.2455	14.2938	11.8573	14.436	11.294	9.19431
13q14.11	NM_152903	89890	KBTBD6	kelch repeat and BTB (POZ) domain containing 6	0.686934	-0.541756	2.12259e-06	0.000290127	4.73893	6.02609	4.49753	3.67574	4.97278	6.8226	4.94752	6.50821	4.35657	11.157	12.9428	14.425	6.93408	9.11538	6.66238	15.7448	15.5013	14.7248	7.20952	7.65586	7.62031	9.87392	12.7126	11.6165	8.55995	6.67158	6.82444	6.39572	4.23485	9.9435	8.26112	9.53049	7.49779	6.40977	8.73642	8.69176	9.56533	9.90627	9.99255	6.58524	5.65812
5q31	NM_018926	56100	PCDHGB6	protocadherin gamma subfamily B, 6	0.518034	-0.948882	2.16103e-06	0.000291388	10.0757	7.21665	4.86449	3.03643	4.11728	5.9491	13.4074	3.2741	1.85573	7.54192	8.3892	7.79347	8.66567	11.7861	8.9452	27.5064	27.7344	30.7322	6.57316	5.84404	6.65884	22.011	16.7153	17.6176	8.79581	10.9999	13.3453	23.0324	19.6057	22.4864	16.0356	16.948	17.3602	15.5023	14.4757	11.3376	15.69	19.6212	19.4858	14.8726	17.9633
10q21.3	NM_012207	3189	HNRNPH3	heterogeneous nuclear ribonucleoprotein H3 (2H9)	0.5161	-0.954277	2.39724e-06	0.000318928	1.25882	7.76064	5.33879	3.27829	5.06141	8.753	7.13812	4.61276	9.64625	17.0648	16.4375	9.80752	23.2218	15.2314	23.6594	16.7637	18.3935	18.6446	24.2762	18.7878	22.274	8.86293	7.69484	19.7562	12.3955	14.275	13.7157	7.17048	6.6825	5.20042	16.3483	17.9772	15.913	18.8652	16.335	21.6086	10.6856	15.6572	11.5937	5.94982	5.88114
12p11.22	NM_020782	57542	KLHL42	kelch-like family member 42	0.761233	-0.39359	2.79179e-06	0.000361772	2.49753	5.53432	3.28513	3.18149	3.93118	5.41825	3.31894	4.47902	4.7314	5.12375	5.73288	4.58282	6.85805	6.9781	5.73222	10.2928	10.1386	9.25921	6.60895	7.22733	7.18827	5.95982	5.19605	6.38019	6.914	6.26766	6.8285	3.44418	3.05802	5.81691	4.61975	5.27548	5.0456	6.25372	6.10973	6.57106	5.57133	5.15288	5.75717	3.06916	3.64399
3q25.31	NM_001190992	9197	SLC33A1	solute carrier family 33 (acetyl-CoA transporter), member 1	1.31742	0.397714	2.78803e-06	0.000361772	4.70875	8.2695	9.76064	8.05116	8.89672	8.12717	6.18895	7.12335	8.68786	3.83776	8.43906	5.25312	5.3683	5.24942	5.53814	6.37663	5.56241	5.27337	7.88836	6.51319	7.86088	5.54079	4.39563	4.87773	5.50014	6.14085	5.42693	3.36753	2.73184	4.74177	4.47884	5.40194	4.49244	6.47635	4.48717	5.30756	5.08619	5.2933	5.63761	3.54396	3.77505
7q11.21	NM_000181	2990	GUSB	glucuronidase, beta	1.52453	0.608367	2.90199e-06	0.000371232	6.45979	5.88257	13.4689	9.09727	8.75007	7.3068	5.6176	3.90039	12.6543	4.48877	5.21085	5.08141	4.7258	5.86864	5.72115	2.96114	2.36285	2.68397	5.66604	5.62381	5.96833	4.46198	4.48338	3.84923	5.78456	5.73515	6.02423	2.87459	3.46176	5.05865	5.76406	4.76941	3.81862	4.47305	2.98468	3.65825	2.94283	4.58258	2.8749	3.55788	2.89142
19q13.11	NM_001285829	1050	CEBPA	CCAAT/enhancer binding protein (C/EBP), alpha	1.97681	0.983178	3.12255e-06	0.00039439	4.30813	3.36265	13.7688	15.9591	7.23346	4.33408	4.54704	3.45114	8.10406	3.8222	3.70736	3.82661	2.97675	2.4749	2.57625	1.94559	1.9224	1.87063	3.74499	2.66384	3.99159	1.85198	1.68559	1.49532	2.01001	2.29593	3.55527	1.40792	2.56318	1.17287	3.8274	3.23027	3.72719	4.25446	4.46514	3.61865	3.48579	1.60538	1.9876	2.66304	3.79055
6q15	NM_006813	10957	PNRC1	proline-rich nuclear receptor coactivator 1	1.09204	0.12703	3.21522e-06	0.000401018	54.5959	62.9765	78.6875	56.9539	59.6189	56.4566	36.293	38.0571	44.3545	38.479	34.8381	34.9429	42.6168	45.0675	48.3126	20.381	19.3097	20.0137	34.6923	29.853	37.3472	32.9691	43.8162	39.9145	48.5321	44.6979	46.1212	32.9688	25.4612	34.181	57.2122	54.0418	50.5637	49.0364	48.7795	53.1282	35.2907	27.1496	26.6462	33.8124	27.6972
7p22.1	NM_001033519	26100	WIPI2	WD repeat domain, phosphoinositide interacting 2	0.691286	-0.532646	3.37936e-06	0.000416287	3.44472	1.54283	2.694	2.13267	3.13233	2.49764	1.77001	3.07616	5.30952	3.45541	4.56643	5.04863	4.68385	4.2407	2.08733	5.87102	6.20506	5.20236	6.93354	5.66508	5.94238	5.22031	4.26008	4.89487	3.87424	3.3344	4.66978	4.64131	4.1497	5.42721	4.42049	4.45786	4.92737	3.46066	4.80119	3.30751	4.78641	4.66479	5.28995	3.46288	3.45567
15q11.1-q11.2	NR_036432	283755	HERC2P3	hect domain and RLD 2 pseudogene 3	0.482056	-1.05273	3.60483e-06	0.000438647	1.22273	2.376	1.12681	0.790925	1.87491	2.59586	2.05622	1.82639	2.40071	3.7206	4.26139	3.62343	4.62385	3.47665	3.21407	6.18457	6.92742	6.49895	7.48187	7.47972	6.60534	4.07875	1.94212	2.96087	7.62099	6.23522	6.62	5.01315	4.93373	10.2429	5.3265	5.87807	6.31245	2.89647	2.58296	3.27312	9.64229	10.9452	11.1031	1.30967	1.63726
19q13.32	NM_005628	6510	SLC1A5	solute carrier family 1 (neutral amino acid transporter), member 5	1.36585	0.449799	3.77253e-06	0.000453522	22.1396	53.5439	49.1785	37.8449	53.0576	39.911	17.9959	7.22513	54.7069	17.3779	18.1568	14.2697	23.0843	14.7016	15.1534	5.05838	4.02825	5.57661	16.7896	13.6749	20.9517	12.5747	9.67499	11.1238	23.5165	32.6365	30.9863	16.2634	16.7293	12.2239	33.8763	27.7671	29.3969	36.6322	22.818	18.3024	13.2284	8.50455	8.22569	13.9029	11.6512
9q22.33	NM_018946	54187	NANS	N-acetylneuraminic acid synthase	1.18249	0.24183	4.12469e-06	0.000483691	11.5446	19.8576	31.3117	16.007	28.191	23.9739	16.7471	18.6226	23.7902	17.3452	25.1129	20.1912	20.0761	20.7286	21.222	10.8939	10.6	10.1997	12.6069	12.6641	13.8603	10.4557	10.1746	8.57174	18.2786	15.9668	16.2089	8.02106	10.088	13.1873	18.4202	19.0041	13.5135	21.0187	14.7427	12.8833	17.422	12.0626	16.8319	11.1452	7.853
19q13.33	NM_000979	6141	RPL18	ribosomal protein L18	1.06688	0.0933999	4.15111e-06	0.000483691	1029.06	1045.11	1017.64	1085.63	949.012	690.008	984.681	677.827	722.241	750.379	773.621	725.655	629.067	703.232	607.614	273.808	237.195	241.448	671.417	530.318	624.34	420.329	582.994	460.963	675.406	805.789	922.395	642.584	711.373	298.301	769.472	712.222	760.359	789.496	775.686	610.391	500.975	417.998	433.778	718.493	672.684
7q11.23	NM_012453	26608	TBL2	transducin (beta)-like 2	1.13117	0.177815	4.16891e-06	0.000483691	13.0189	16.8484	20.0371	16.7188	21.0538	17.1	11.29	8.92692	20.2537	13.5633	17.3519	14.6163	14.4979	15.0345	13.2869	6.51456	7.30432	6.45848	12.9444	12.2894	15.7292	9.27914	9.67831	9.59939	19.1198	17.0856	16.725	8.64437	9.21967	10.7183	17.0675	16.4895	13.6529	17.1365	13.7016	12.1871	12.6981	10.0698	10.9524	10.8467	9.81287
2q31.1	NM_024843	79901	CYBRD1	cytochrome b reductase 1	1.50064	0.585578	4.61962e-06	0.000523802	3.43345	27.5363	12.0459	8.78882	16.6627	15.057	5.77288	11.8157	13.4096	4.63014	5.58237	3.57949	8.99081	5.37329	8.09744	1.89378	1.4957	1.14302	13.0623	13.2295	15.7941	5.35414	4.20899	5.28271	14.0147	11.053	9.70979	3.2499	4.0811	9.93838	10.4097	9.33633	8.40154	11.1	7.82217	6.50234	7.15375	3.364	7.05752	3.60005	3.6249
19q13.2	NM_024907	115290	FBXO17	F-box protein 17	1.68631	0.753869	4.57817e-06	0.000523802	8.91138	20.9507	11.0655	9.57692	11.6135	9.40244	6.60525	2.47737	8.40261	3.88587	3.36646	3.6454	4.32009	5.27018	6.09937	0.751489	6.7e-05	1.01541	6.36295	4.78529	6.26323	3.67306	1.64091	2.58388	7.12451	8.61478	11.0013	5.68623	3.74899	3.36547	7.42473	6.63253	7.10511	8.11264	6.00571	5.52586	3.28784	4.16673	4.93297	3.32667	4.10409
14q11.2-q12	NM_004563	5106	PCK2	phosphoenolpyruvate carboxykinase 2 (mitochondrial)	1.7534	0.810159	4.68056e-06	0.000524749	7.82048	13.062	14.5409	14.0908	14.375	11.5248	5.92429	3.41018	20.8131	3.58348	4.40902	3.46646	5.05303	9.60612	7.26231	1.68325	1.64695	1.74404	5.12503	4.89848	5.90869	4.61632	3.80345	3.47512	7.46612	10.3592	10.5403	4.62728	5.13861	3.44027	7.03548	6.4287	6.09248	14.815	9.96938	5.68181	3.28611	1.9147	1.69305	3.75061	2.77492
Xq22.2	NM_207318	139231	FAM199X	family with sequence similarity 199, X-linked	0.610693	-0.711482	4.99169e-06	0.000553412	2.53167	3.69382	2.75509	2.28321	2.76226	4.28932	2.49999	4.05356	5.40409	8.74826	9.55256	8.27331	4.10278	5.41727	5.80565	12.6675	13.0207	10.7648	4.42514	5.55617	5.17267	5.2946	5.56792	7.09743	4.55002	3.90072	3.90716	3.15846	2.41314	6.55848	4.4313	4.68688	4.35394	6.14582	6.4948	7.81746	11.1586	10.2363	11.3235	6.20067	6.21571
19q13.33	NR_110730	101928378	PTOV1-AS2	n/a	0.687569	-0.540423	5.22811e-06	0.00056877	1.26549	2.11233	1.86486	1.08758	0.815656	1.20136	1.29626	0.955581	1.17779	1.80241	1.80846	2.23061	1.04536	2.1844	2.15565	2.07747	3.55713	3.18796	3.01196	2.95575	2.94971	3.84586	1.12118	2.05422	2.51353	1.49707	2.28205	5.4744	4.25646	3.76734	2.12033	2.15384	3.62711	1.82906	1.63904	2.14848	2.6413	3.71557	2.5311	1.86687	3.07158
16p11.2	NM_004783	9344	TAOK2	TAO kinase 2	0.59914	-0.739036	5.24422e-06	0.00056877	6.56137	4.54773	3.44919	2.92194	3.3404	2.90218	5.00491	2.02356	2.80666	6.56796	6.0798	6.10913	2.61896	7.58626	4.8886	12.7769	13.0198	14.4228	4.64985	3.85693	4.49138	9.88106	10.0066	8.14554	7.59235	7.73598	9.20914	10.4508	9.56513	5.32074	8.66019	9.35837	8.96276	8.22398	8.6486	7.12333	6.40802	7.82113	6.93773	6.33607	7.98939
15q15.3	NM_005313	2923	PDIA3	protein disulfide isomerase family A, member 3	1.1277	0.173382	5.53696e-06	0.000586853	31.8833	92.8767	85.8812	64.4049	98.5542	104.821	53.5814	57.0061	100.059	53.6727	54.5443	32.8526	92.3688	55.3914	72.9555	30.5072	28.0375	32.1054	55.0106	54.3543	51.9477	26.6226	21.9352	31.8516	72.2453	71.8561	73.795	17.0798	18.9698	28.1717	47.5915	44.2128	41.0589	82.5587	56.3254	66.9243	48.3026	40.8238	45.3478	32.5952	29.6296
5q14.1	NM_004866	9522	SCAMP1	secretory carrier membrane protein 1	0.676157	-0.56457	5.57462e-06	0.000586853	3.85993	8.06053	5.96172	5.9374	6.84751	9.63902	6.69534	14.3811	7.1161	12.4894	13.5092	13.3389	10.5267	12.2574	12.1857	38.6158	38.4121	29.3663	8.29297	10.0803	10.2137	12.5927	18.3264	19.4881	12.2575	10.3009	10.4915	7.08588	6.07551	18.5267	11.0711	12.3888	11.1168	12.3114	14.8615	16.7776	17.9872	12.7782	17.5018	9.55168	7.87722
6p24.2	NM_001135575	221710	SMIM13	small integral membrane protein 13	0.719394	-0.475145	5.5874e-06	0.000586853	2.65846	4.98846	4.20673	4.12902	4.61846	5.71929	3.26835	6.78219	5.06444	6.82448	8.47947	6.77444	6.57219	6.86391	5.49984	21.0405	19.6305	15.8337	5.65298	7.7637	8.40857	7.14743	10.1302	9.34892	6.9244	5.45469	6.23317	4.31748	3.57374	8.34172	5.78608	6.46695	6.1224	6.47683	8.31904	8.70046	7.36995	6.3942	7.90906	4.97638	3.57076
21q22.11	NM_005534	3460	IFNGR2	interferon gamma receptor 2 (interferon gamma transducer 1)	1.13898	0.187737	5.89761e-06	0.000606664	9.85481	18.4023	18.9857	16.496	17.2403	17.3551	12.0859	16.5134	17.1181	11.0618	12.3952	11.7963	14.5718	15.7494	13.802	12.4243	12.5079	10.8918	15.7839	14.4078	15.5372	11.0171	10.404	10.1576	14.0371	11.7536	12.2736	6.71993	6.79368	11.5475	12.7674	12.8228	11.2355	13.3154	12.7148	12.4362	12.3065	11.1143	11.9115	9.8698	8.47687
12p13.1	NR_003932	387841	RPL13AP20	ribosomal protein L13a pseudogene 20	1.42662	0.512599	5.84899e-06	0.000606664	7.63729	9.76572	17.5817	16.0638	17.291	10.6929	10.7074	8.78872	4.67886	9.6519	6.6525	6.93462	7.46422	7.88748	6.96627	4.31937	3.60373	3.62326	5.19204	5.6224	5.80371	4.62956	6.19116	5.6718	4.97861	5.58532	5.2249	5.707	5.39928	3.35558	9.00552	8.11588	9.06389	6.16699	6.33445	7.83177	5.96374	3.85815	4.06919	7.52436	6.92261
7q22.1	NR_036569	101752399	STAG3L5P-PVRIG2P-PILRB	STAG3L5P-PVRIG2P-PILRB readthrough	0.734158	-0.445837	5.96109e-06	0.000606936	1.04275	1.36113	1.13954	0.865491	1.2966	1.11821	1.87769	0.899437	2.57044	2.26667	1.88649	1.28834	1.94877	2.24493	1.84855	2.01427	2.71952	2.18085	2.87992	2.90977	2.67104	3.10178	1.51839	2.13117	2.00178	2.27623	1.99148	3.08124	3.10744	1.99315	2.38706	2.07271	3.0438	1.89626	1.38451	1.88687	3.44084	3.36009	2.27465	2.1237	1.43402
13q21.33	NM_001071775	440145	MZT1	mitotic spindle organizing protein 1	0.644026	-0.63481	6.67869e-06	0.000656139	2.23917	4.71003	4.00965	5.34341	2.28329	3.27234	2.42005	5.23223	4.18544	8.45303	9.1587	9.55415	5.58987	13.0695	8.95919	7.65587	7.57864	6.09215	5.18279	5.28963	5.91742	6.35331	9.66061	7.65619	5.92184	5.74085	5.5776	4.72187	2.56222	6.03455	7.95813	8.93313	7.39585	6.22471	6.39632	8.8396	6.00547	5.40244	4.93658	7.28822	6.09081
19q13.32	NM_018215	55228	PNMAL1	paraneoplastic Ma antigen family-like 1	0.777333	-0.363396	6.6127e-06	0.000656139	15.0639	16.6089	15.5218	9.80038	11.4247	11.6632	18.0691	18.1109	13.8265	13.8632	18.6941	17.4765	12.2469	19.5441	15.9641	31.4531	32.1019	28.2165	23.5727	23.6605	24.4063	20.656	23.7089	23.0691	24.9766	18.8601	19.3993	16.3438	14.7509	27.722	19.0152	22.5145	16.6333	21.2397	21.4395	19.1604	26.0638	26.9214	29.7761	14.0151	13.9488
11q13.5	NM_015516	25987	TSKU	tsukushi, small leucine rich proteoglycan	1.56583	0.646924	6.54182e-06	0.000656139	9.73678	28.421	25.3689	26.1634	17.0308	16.1288	10.0983	7.43506	16.685	11.5145	8.3039	7.23605	7.13539	5.62564	11.258	3.91611	2.08531	5.62714	7.99404	6.13667	13.1747	4.11143	7.56833	2.78905	8.34404	12.6308	15.0233	7.50422	8.05088	3.05528	11.3358	13.127	14.2472	10.6043	8.30638	7.1445	7.96279	8.45633	4.83911	4.82676	10.537
8q21.13	NM_016010	51101	ZC2HC1A	zinc finger, C2HC-type containing 1A	0.691438	-0.532328	6.70737e-06	0.000656139	2.43768	3.47181	2.87806	3.3507	3.04657	4.86168	3.48995	7.35208	2.86126	5.16016	4.61248	4.31686	5.72125	7.77932	5.21371	12.6798	13.1003	12.7674	4.09229	4.15519	4.032	7.4661	10.1391	9.74907	5.58634	5.7743	5.82467	5.06374	4.14956	6.3205	4.69687	5.13782	4.4495	6.55059	7.78169	7.93206	5.5721	6.91476	6.41918	4.5975	4.96697
11p14.3	NM_022725	2188	FANCF	Fanconi anemia, complementation group F	0.757304	-0.401055	6.99006e-06	0.000665052	5.4488	5.19868	4.6195	5.15505	3.33137	4.28791	3.28682	3.56246	3.27156	7.03007	6.54949	8.62264	5.30975	7.46059	4.76011	6.943	6.98254	7.02696	5.35031	4.76245	5.23685	5.96044	8.076	6.81784	5.74043	5.21659	5.36253	6.56642	4.76103	6.85071	6.005	6.13313	5.42732	4.95439	5.80427	5.70279	6.83979	6.78716	6.91233	6.83279	6.66467
9q33.3	NR_026677	81571	MIR600HG	MIR600 host gene (non-protein coding)	0.763511	-0.38928	6.99845e-06	0.000665052	1.35877	1.58711	1.10457	0.579073	1.22766	1.99246	2.16088	0.866461	1.36351	1.11514	1.81097	1.62223	1.24294	2.16955	2.0953	5.22243	5.99358	5.74125	2.09806	2.47409	1.67224	4.08852	1.73022	2.25676	1.95328	2.11626	1.88322	2.33327	2.82899	2.53163	1.70808	2.22759	2.01322	2.21283	1.89609	1.76449	2.19667	3.51268	2.30931	1.11983	1.48584
8q22.1	NM_203390	389677	RBM12B	RNA binding motif protein 12B	0.791605	-0.337147	6.96687e-06	0.000665052	3.34496	5.93331	4.37894	4.26947	4.10551	6.21506	4.71022	5.51549	6.14699	7.04992	7.37323	6.51994	7.40347	7.98386	8.06063	8.4248	8.6312	8.35959	7.04208	7.73501	6.13557	7.37518	6.63392	8.24097	8.38771	6.33768	6.27328	4.21168	3.69056	4.95188	5.86943	6.45729	6.95378	6.64815	6.56172	7.80919	6.29543	7.2222	6.52102	4.22029	4.74517
12q13.13	NM_001193511	7786	MAP3K12	mitogen-activated protein kinase kinase kinase 12	0.716715	-0.480528	7.39174e-06	0.0006958	6.17901	4.5735	2.6132	2.05227	2.19337	3.54121	6.28927	2.07145	3.75455	3.70918	5.16482	4.65257	5.39868	4.53996	4.5446	6.78261	6.34121	7.15459	4.7476	6.40677	6.53732	5.55269	5.51731	5.39995	5.32951	3.60829	5.19891	9.28286	7.6573	6.29188	6.60769	5.40047	4.98715	5.46824	5.73397	5.07939	5.22271	8.01039	5.95432	4.19255	4.67217
19q13.31	NM_014297	23474	ETHE1	ethylmalonic encephalopathy 1	1.43844	0.524506	7.69435e-06	0.000714638	13.6964	15.863	20.5707	26.8405	22.5093	15.7073	14.7628	8.68261	26.4343	14.1399	13.3034	12.127	8.71846	8.53035	6.4044	3.84432	3.95053	3.67467	10.5917	9.50217	8.86389	7.57056	9.57895	7.0734	6.94859	11.122	10.7777	11.0317	10.5841	4.81721	15.1657	12.5615	14.2547	16.4931	14.8319	11.627	8.44504	7.78802	8.13016	11.0104	12.2569
15q23	NM_001004439	22801	ITGA11	integrin, alpha 11	2.20743	1.14237	7.73511e-06	0.000714638	1.632	15.384	11.3299	3.89245	5.89709	4.27826	1.51563	0.647594	6.99174	2.14596	2.90378	1.59554	1.81866	1.2144	1.55794	0.312783	0.271957	0.180159	4.12889	4.08859	4.64745	1.5293	0.769607	1.39148	2.70623	3.03686	2.64514	0.907054	1.46647	1.06229	3.5085	3.31188	2.78231	3.78926	3.3068	2.11905	0.888631	0.501523	0.549029	0.770404	0.612898
3q25.1	NM_016275	51714	SELT	selenoprotein T	0.875565	-0.191714	7.93775e-06	0.000721218	15.542	17.881	16.8975	16.7426	15.1691	16.8642	11.1636	27.1852	19.3009	25.8499	25.0567	26.213	16.992	21.1228	16.5562	26.2084	23.6379	22.9621	19.4702	19.3443	21.6255	16.0571	26.3107	21.8615	18.2125	18.7473	17.2738	23.3597	17.1747	18.4484	20.5838	20.5588	18.4072	20.6852	22.3577	20.691	21.1231	17.7216	19.4472	24.136	21.2383
15q25.1	NM_007364	23423	TMED3	transmembrane emp24 protein transport domain containing 3	1.18566	0.245693	7.95089e-06	0.000721218	70.2887	67.9561	60.7979	62.4821	55.1867	40.8348	71.0523	59.1252	73.9539	49.0505	42.2381	46.1673	25.4485	37.0019	35.5412	26.8488	27.0416	23.8426	29.5658	24.2718	28.7706	26.2487	35.6058	28.7288	38.4597	46.1943	53.1883	48.2163	44.6999	22.3919	46.5778	44.5943	48.0468	55.4777	47.9626	37.8228	32.723	25.233	26.3204	25.7218	28.3212
20p12.3	NM_001200	650	BMP2	bone morphogenetic protein 2	1.5628	0.644138	8.18446e-06	0.00073351	1.92067	6.32229	6.87461	5.09885	6.41152	5.83811	1.74927	2.21372	3.19972	3.06024	2.38097	1.6763	3.33366	2.4661	2.48592	2.23003	1.4267	2.20375	1.91681	2.27589	2.48785	1.80183	1.39325	1.68714	4.52615	5.53361	3.95374	1.44897	0.87098	1.57226	4.02781	3.16711	2.38351	5.79288	3.597	2.99118	4.25438	3.1836	3.62832	2.24714	1.56699
5q31.1	NM_001017974	8974	P4HA2	prolyl 4-hydroxylase, alpha polypeptide II	1.42	0.505895	8.23342e-06	0.00073351	18.0148	57.1016	43.279	20.9957	66.5476	55.1289	17.5215	18.5996	30.5474	16.2663	16.3509	11.8278	26.2945	30.1417	27.4075	4.09938	5.44635	5.16246	26.5219	25.5328	26.6294	11.1107	8.14352	7.14745	32.4132	31.9327	27.8522	12.9519	14.8133	15.3909	24.0944	19.3746	18.5927	51.4702	27.8256	22.4157	14.7228	9.39881	9.45024	10.043	7.69979
16p11.2	NM_002746	5595	MAPK3	mitogen-activated protein kinase 3	0.661312	-0.596597	8.44318e-06	0.000742709	8.85389	8.1743	10.4451	8.95565	6.58104	4.38596	8.80883	3.59802	7.25764	13.3711	14.9065	13.3042	9.85481	13.0249	9.46204	9.00837	10.3904	9.40623	15.0961	13.1574	16.2695	13.3631	13.6203	10.2938	15.7944	13.8564	17.5724	20.4828	20.9522	10.564	14.4651	15.7333	15.3072	15.108	14.6121	11.8868	15.0953	13.9916	14.2741	16.7483	16.8342
4q26	NM_014822	9871	SEC24D	SEC24 family member D	1.30158	0.380269	8.48555e-06	0.000742709	7.26703	26.2894	27.6452	19.3806	28.5321	26.9737	8.07204	10.1732	42.1621	13.8782	17.1666	11.1319	23.381	16.3459	20.8375	4.40249	3.99937	4.15757	14.5056	14.2432	15.5083	10.0191	6.86741	10.3264	22.3298	20.0788	20.0832	5.53348	5.33885	13.6604	19.5034	17.9739	15.6059	23.8963	16.3941	18.5869	9.19316	7.4914	9.33784	6.17596	5.48072
15q22.31	NM_024798	79856	SNX22	sorting nexin 22	1.23032	0.299032	8.64561e-06	0.000750139	19.1194	34.6809	40.944	17.1119	35.4735	26.9637	16.2736	19.5172	23.4092	16.835	20.8147	14.4715	23.121	17.3438	16.9528	10.6433	10.4285	10.0878	17.8904	15.1105	15.4559	13.0565	11.7593	11.2764	17.5905	21.1861	20.8763	16.8376	18.983	14.1559	16.1437	15.2764	12.4323	25.4197	19.784	14.4248	15.0249	11.6953	12.772	15.3691	13.7782
8q24.22	NM_006096	10397	NDRG1	N-myc downstream regulated 1	1.40498	0.490553	8.84381e-06	0.000755487	8.94289	9.26117	41.0272	22.55	83.4423	53.0494	9.60799	6.20526	23.2028	16.6887	21.4171	17.1397	14.0182	18.5593	10.7969	7.04036	7.1626	7.13648	11.2403	10.8921	14.1015	8.68152	6.9017	8.90537	21.7749	21.0341	21.6109	4.26923	5.07785	4.61356	16.0209	11.4213	13.5157	14.8493	12.1103	9.65461	8.57156	5.93833	5.59938	4.16286	4.05917
5p13.1	NM_012382	23548	TTC33	tetratricopeptide repeat domain 33	0.701548	-0.511387	8.85869e-06	0.000755487	1.19208	2.43863	2.54382	2.97706	2.60225	3.14952	2.22893	4.19543	2.77852	4.63846	3.64229	3.99735	4.29669	4.38474	5.09544	4.75093	4.37505	3.89993	4.20982	4.78813	5.29311	2.85015	3.64172	4.60964	4.59807	4.37095	4.6612	2.45592	1.93603	5.54016	4.31728	4.60514	4.15081	4.88332	5.10457	6.32876	4.45851	3.78734	4.99299	2.73193	2.55753
12q14.1	NM_153377	121227	LRIG3	leucine-rich repeats and immunoglobulin-like domains 3	1.65043	0.722843	9.16228e-06	0.000765486	2.50113	11.2518	4.37988	4.29654	5.36269	8.02074	3.15467	5.37003	4.49049	2.27994	1.86155	1.65872	3.62093	1.86588	6.27351	0.615572	0.665319	0.58277	2.62635	3.2956	3.28475	2.47174	1.18247	1.54421	5.20803	4.43532	4.30439	1.3841	1.41859	3.06039	3.41857	5.29851	3.65648	4.71775	1.85363	3.3243	4.83265	3.92776	4.06318	3.23888	2.35483
6p22.3	NM_003107	6659	SOX4	SRY (sex determining region Y)-box 4	0.793826	-0.333106	9.20608e-06	0.000765486	51.1211	42.4273	32.5757	23.4621	37.5876	46.1478	40.0274	29.5472	29.8823	66.0097	74.0557	91.0938	55.13	79.7819	35.4898	132.461	133.838	145.214	34.0949	31.2081	31.1639	97.8298	113.24	101.649	64.0607	50.4382	51.762	54.9185	44.648	59.7891	49.2185	57.2916	48.8005	48.2052	67.7473	67.3356	52.9423	61.3952	56.6287	48.9888	47.298
17p13.1	NM_021210	58485	TRAPPC1	trafficking protein particle complex 1	0.861994	-0.21425	9.13041e-06	0.000765486	27.1981	25.9485	30.7538	17.054	15.4055	20.6665	34.1863	18.9335	36.6736	31.7248	33.8241	29.6567	27.7441	38.3334	32.2602	35.0123	32.9475	27.8349	29.3745	24.3278	33.2346	28.0223	16.2592	24.6108	31.2862	33.332	37.592	40.854	27.8758	23.744	32.9371	34.8577	30.0306	42.278	36.52	25.4776	30.1607	27.1578	29.1883	28.0316	30.1195
1q25.1	NR_002578	60674	GAS5	growth arrest-specific 5 (non-protein coding)	1.10527	0.144404	9.4474e-06	0.000772673	152.608	576.114	226.257	320.472	386.542	253.994	156.017	368.379	294.404	153.741	213.33	202.212	134.977	200.433	183.799	125.335	116.906	101.444	149.775	154.453	145.057	113.156	159.955	143.96	284.958	254.561	217.882	53.0639	77.0079	84.1159	192.431	193.587	165.849	202.281	182.38	218.289	117.795	86.0956	107.216	104.09	88.142
14q11.2	NM_001166269	54930	HAUS4	HAUS augmin-like complex, subunit 4	1.47627	0.561953	9.43085e-06	0.000772673	8.97637	11.4426	17.2284	18.4258	15.1922	9.48672	10.4653	14.2938	16.4976	5.98472	7.6772	6.1141	10.3115	12.6298	7.47916	4.11859	3.83604	4.58834	9.91215	10.4589	7.82131	8.6834	7.40828	7.22957	9.34641	12.5858	9.63672	3.8802	4.55412	4.79107	9.45915	8.94462	8.01363	13.4904	9.78529	9.10537	3.15762	2.41822	3.82526	4.92148	6.09006
13q32.1	NM_021033	5911	RAP2A	RAP2A, member of RAS oncogene family	0.727036	-0.459902	9.57991e-06	0.000777141	5.77207	8.41616	11.1797	10.5674	9.75354	13.276	6.20593	13.9998	11.2838	17.8078	19.7756	19.6857	18.6884	18.2617	18.1408	29.6289	24.8386	22.431	11.5124	14.7662	15.1727	11.7026	14.4147	19.4327	15.5091	12.8894	12.6523	8.00631	7.22782	22.1332	15.5839	17.2292	14.5385	15.9025	16.7172	20.0955	18.6426	14.1309	20.8276	9.75434	9.13849
7p14.2	NM_001199708	23366	KIAA0895	KIAA0895	0.52891	-0.918907	9.67275e-06	0.000778344	0	1.438	1.16856	1.49557	0.763911	1.63816	0.486738	3.13347	1.07405	2.10649	2.97406	1.38308	2.59655	2.80682	3.44202	3.83552	4.43616	3.99805	3.49749	4.46232	2.94977	1.49655	2.56476	1.81557	4.07636	3.07255	2.96536	1.51388	0.877887	4.42784	2.58733	2.4348	3.00621	3.2858	3.40418	4.34492	4.91873	2.94557	4.04615	3.00763	3.00471
17q21.2	NM_021078	2648	KAT2A	K(lysine) acetyltransferase 2A	0.720357	-0.473216	9.85026e-06	0.000786287	7.42572	9.21728	5.99923	5.51237	5.8183	6.14796	6.37075	3.34436	5.9335	8.84891	7.53633	9.80053	7.91573	6.3898	7.49001	7.90575	9.32595	10.3277	13.8244	11.9355	12.4042	12.2256	7.62455	10.5511	7.93007	8.95211	9.89739	19.1903	18.0252	9.66412	10.9579	10.2726	11.1738	8.01741	8.06038	8.37886	10.4649	14.1704	10.3546	8.0465	11.4451
4p14	NM_138389	92689	FAM114A1	family with sequence similarity 114, member A1	1.57194	0.652546	1.01402e-05	0.000790045	5.07527	18.4772	19.3998	11.4987	24.7326	21.7803	5.80695	6.04628	32.4873	10.0468	11.0959	5.7767	15.8395	7.5729	13.3432	0.935086	1.18539	0.882432	10.8278	10.2576	13.2511	4.91696	3.45797	5.1456	16.5255	15.9769	13.2053	4.67102	4.2625	6.1551	11.2528	9.96039	8.85066	15.5817	11.3754	10.9215	6.81855	2.83975	5.91912	4.57526	3.13837
12q14	NM_020841	114882	OSBPL8	oxysterol binding protein-like 8	0.639318	-0.645395	1.0214e-05	0.000790045	2.04505	2.84401	4.8716	2.96317	2.86335	3.18105	4.2699	10.1309	5.78086	9.06765	8.02737	7.89677	5.01909	8.01897	8.16821	12.362	11.4612	14.4101	4.64228	4.67367	4.78798	8.3086	8.28524	9.26532	7.35515	5.51928	8.12792	4.82177	2.37226	6.96449	4.35336	8.31816	7.3849	7.46145	9.25108	8.97783	5.57266	9.83573	10.0679	3.8224	5.96069
15q11.2	NR_022008	8123	PWAR5	Prader Willi/Angelman region RNA 5	0.627877	-0.671445	1.00987e-05	0.000790045	2.20149	6.57167	2.84234	2.94198	3.34427	8.17967	3.56784	3.6311	3.96205	5.9714	6.8426	4.91641	8.3736	7.31205	11.2314	11.0893	12.1675	10.6672	5.10399	6.70169	3.96596	11.99	6.77346	11.0821	8.63382	7.49591	7.13002	5.23023	4.05286	5.49161	6.14855	6.8872	7.34076	8.41508	8.40191	9.43874	9.42702	12.4918	9.42951	3.82381	4.08775
7q21.12	NM_003130	6717	SRI	sorcin	0.741976	-0.430555	1.00817e-05	0.000790045	6.45457	10.6508	5.51966	7.78501	5.89212	9.18197	6.96764	16.7852	7.24185	15.9753	14.3266	11.8112	11.3465	18.2583	15.2935	13.7042	12.1206	10.7654	8.80183	10.6849	11.2413	10.0216	14.1626	12.5943	12.3821	11.508	12.1005	8.30326	7.78364	11.4273	11.2262	13.8156	11.1695	12.3914	12.6597	15.0331	17.287	13.074	16.0529	10.7425	11.9162
8p11.23	NM_004095	1978	EIF4EBP1	eukaryotic translation initiation factor 4E binding protein 1	1.1542	0.206895	1.04847e-05	0.000798601	70.9577	117.81	136.027	119.709	118.884	94.6283	57.3248	55.047	97.5494	68.7604	71.6244	56.3992	73.8496	66.1285	56.9518	16.1239	18.4123	14.4939	73.3229	58.0774	73.8154	38.9246	43.2861	33.6642	78.8889	98.447	102.144	45.0562	57.2532	28.2295	73.7305	67.9208	66.1723	120.355	77.5233	65.1522	37.635	25.1075	31.4034	48.6082	40.4112
12q23.1	NM_001032284	7112	TMPO	thymopoietin	0.53838	-0.893303	1.04575e-05	0.000798601	4.86087	5.8952	4.14713	2.98921	4.89175	8.19761	6.50434	9.3539	0.532722	7.47969	8.52038	10.6988	22.3153	12.6125	10.2608	13.6718	12.0958	12.2861	13.9204	12.4188	13.7135	12.4555	21.356	14.9492	6.541	7.01214	7.57443	9.5237	6.99712	10.0715	11.3645	14.1994	10.6699	7.91742	13.503	13.8604	14.5392	13.0813	13.126	11.8646	10.2864
19q13.33	NM_017457	9266	CYTH2	cytohesin 2	0.702754	-0.508909	1.06647e-05	0.000800096	7.79811	3.90659	4.45203	3.97387	4.7135	4.90811	7.26452	2.47391	2.79571	6.53663	6.99552	7.04532	4.68946	8.27494	6.34607	12.6596	13.6556	14.8087	7.51554	7.65524	6.4029	10.4818	7.61217	7.39525	6.74028	6.35255	9.13546	10.8863	9.74629	8.07633	7.19721	9.21303	7.37322	4.84109	5.99045	4.80936	6.36679	7.28651	6.36714	5.09927	4.92082
8p21.3	NM_021630	64236	PDLIM2	PDZ and LIM domain 2 (mystique)	2.30467	1.20456	1.06563e-05	0.000800096	7.05727	5.33666	13.3884	11.6084	7.45508	4.54388	3.88822	3.60166	15.1706	1.87836	3.42826	2.50062	2.21902	2.67962	2.3405	1.069	0.532084	0.931017	0.957227	1.74496	1.66303	2.31306	2.34311	1.77947	5.26856	3.97462	5.21156	4.75304	4.63664	2.42205	3.77232	2.66359	2.39181	5.00824	3.54173	2.16565	2.78929	2.28234	1.8844	3.42482	3.15543
15q22.2	NM_004039	302	ANXA2	annexin A2	1.23478	0.304257	1.10584e-05	0.000804147	52.5898	132.472	228.429	158.652	274.946	238.457	75.1646	130.5	456.991	90.4015	102.223	50.5433	197.034	90.7932	166.761	13.9651	15.5818	11.5673	77.0747	78.0504	76.3878	45.9519	33.189	42.1372	192.45	200.713	168.568	42.058	46.0207	111.936	100.13	73.2445	62.2607	213.711	115.4	117.523	61.516	35.0478	54.1434	43.3412	41.4915
9q34.11	NM_054012	445	ASS1	argininosuccinate synthase 1	1.29253	0.370193	1.09978e-05	0.000804147	36.0365	71.7979	50.2282	43.3396	56.4823	51.0182	24.0284	24.1836	44.7698	21.0625	23.3812	18.552	35.026	35.8945	29.103	5.83904	5.71005	5.53442	40.8331	37.1716	46.4368	16.7061	22.6975	18.1359	27.1352	32.5823	30.6282	21.6944	28.5405	14.8768	33.4821	33.0781	28.9553	44.5431	31.5466	19.7615	24.7758	16.7933	19.7181	20.8477	19.2932
12p13.31	NM_001769	928	CD9	CD9 molecule	1.21388	0.279624	1.11217e-05	0.000804147	13.1106	16.0307	45.384	43.2157	24.647	23.3144	12.3114	22.6827	41.189	19.3655	20.2807	16.5792	27.0162	21.0344	18.8639	10.4183	9.23234	7.67056	16.4684	14.6863	15.8727	14.4023	15.6036	13.7609	26.8752	29.0632	24.1658	6.08513	5.36083	8.43195	23.8881	22.539	19.1039	25.8044	16.7792	18.4366	20.4425	13.3523	17.1723	17.8791	12.5386
3p25.1	NR_046084	100505696	SH3BP5-AS1	SH3BP5 antisense RNA 1	0.789392	-0.341186	1.09001e-05	0.000804147	1.87526	2.7577	2.22298	1.12402	2.21231	3.08613	2.98206	2.96149	4.0603	3.02565	3.95836	3.34916	3.21158	3.27305	3.88027	7.76263	7.24211	7.2101	3.58246	3.69407	3.60791	4.2689	3.34263	4.29628	4.31773	3.47373	2.69041	2.50949	2.13241	4.58372	2.76494	4.02599	2.63103	3.7226	3.09128	3.47264	3.46916	3.99289	4.36209	2.17027	2.00047
14q23.1	NM_012460	26520	TIMM9	translocase of inner mitochondrial membrane 9 homolog (yeast)	1.14457	0.194808	1.08845e-05	0.000804147	6.94386	17.3254	18.2673	21.6692	18.7385	15.5281	9.90381	16.0408	17.7097	13.1736	15.1726	12.8194	9.70467	12.5013	14.228	9.1344	8.4924	8.41067	14.1575	12.0224	13.7967	8.32583	11.8299	10.4003	13.8589	13.0458	12.4981	6.00466	7.04177	10.1813	14.4547	13.248	13.1517	17.019	13.1341	15.5668	10.1706	7.90636	9.11699	10.0082	7.29767
11p15	NM_000990	6157	RPL27A	ribosomal protein L27a	1.05156	0.0725325	1.14642e-05	0.000820398	135.76	206.439	189.344	186.181	184.596	149.878	108.518	157.401	116.839	122.671	116.728	106.206	128.077	109.58	118.927	82.0117	71.8614	67.6367	110.704	94.4201	106.077	73.501	101.352	84.5381	133.481	149.735	149.143	106.531	116.835	56.4881	148.97	142.468	135.616	132.535	123.696	117.52	90.4585	72.5181	78.8352	115.156	109.34
21q22.2	NM_004627	7485	WRB	tryptophan rich basic protein	0.701118	-0.51227	1.15109e-05	0.000820398	23.3195	21.8428	10.8065	13.3023	11.0394	15.6407	18.7659	48.141	9.05806	32.8963	27.2988	36.5156	17.3765	26.5044	28.0542	38.7045	35.7982	35.3086	15.3305	16.2966	16.7411	24.4476	38.2843	26.0218	40.0015	32.9141	32.4533	46.4978	30.2975	48.915	24.6225	30.3821	26.8217	28.4268	30.5359	21.5839	65.6466	56.5369	60.4398	58.291	44.7453
19q13.41	NM_001145434	400713	ZNF880	zinc finger protein 880	0.668844	-0.580258	1.25396e-05	0.000887379	2.36566	4.89662	4.99214	4.66887	6.63371	7.25036	4.65564	8.91632	6.62222	11.4779	12.2281	9.9502	10.9421	9.89622	8.67105	35.5343	26.6411	27.1253	12.1572	12.8906	12.9554	9.53468	7.56966	11.9683	9.50663	8.32273	8.1743	6.24539	7.73247	11.4907	8.31372	9.77424	8.22454	5.22218	6.88539	9.66882	9.37816	9.33694	11.1929	2.77432	3.38754
3p22.3	NM_006371	10491	CRTAP	cartilage associated protein	1.25916	0.33246	1.3009e-05	0.000914113	8.97635	24.5461	23.9026	21.7754	20.5743	19.0253	8.46527	7.43703	28.2317	11.1086	12.8981	9.65576	12.6102	11.4466	12.6299	5.22734	5.39104	5.62348	19.09	16.2965	19.2908	7.87983	6.68917	8.41009	14.5893	14.1901	12.9821	7.24138	7.85384	10.5041	14.321	14.1292	13.4206	18.9171	13.3237	13.8078	10.4154	7.60617	9.27731	8.04937	6.22888
21q22.11	NM_000628	3588	IL10RB	interleukin 10 receptor, beta	1.30986	0.389417	1.32087e-05	0.00092165	2.87776	11.7004	9.48343	8.20455	10.5901	10.9582	4.44406	6.73135	10.0234	5.61207	5.87169	6.27532	10.4747	5.45712	6.27256	2.88781	2.54066	2.38911	8.82131	7.83924	10.1263	4.53468	5.07206	5.72982	7.96365	5.68774	5.76841	3.0978	2.9296	5.72264	6.60869	6.29673	5.60665	6.97718	6.43483	6.59085	6.19991	5.11189	6.28385	4.44065	3.18334
19p13.12	NM_014371	26993	AKAP8L	A kinase (PRKA) anchor protein 8-like	0.778719	-0.360825	1.35018e-05	0.000932937	10.8214	13.1841	15.1896	5.76737	11.0742	12.6973	15.7678	9.84897	17.3936	11.2461	16.3612	17.7098	13.9976	18.9452	15.479	16.9163	19.1864	18.6705	23.9646	23.6523	24.9739	20.538	14.1297	18.0351	19.8527	14.4811	15.7697	15.5453	15.314	18.5572	18.1097	20.7089	18.4668	17.6063	15.3688	15.6884	20.9932	22.7793	21.248	11.3923	13.2636
22q11.23	NR_024448	91316	GUSBP11	glucuronidase, beta pseudogene 11	0.814919	-0.295272	1.35574e-05	0.000932937	2.32298	1.84583	2.11425	1.93125	1.04737	1.52919	3.21315	2.8596	2.66669	2.40235	2.30701	3.00047	2.37515	2.65535	2.35966	4.66692	5.18625	5.07436	2.84168	3.05221	2.60311	4.94617	2.42536	3.35101	1.57234	1.99282	1.60767	4.53618	3.94533	2.8282	2.99543	3.3002	3.2345	2.15211	2.93642	2.91874	3.32827	4.2713	2.38915	1.83458	2.73654
6q27	NM_001166412	64094	SMOC2	SPARC related modular calcium binding 2	1.91735	0.939113	1.368e-05	0.000934926	3.06344	31.5008	17.0669	12.1747	20.3212	14.1923	3.53672	2.48018	3.83274	3.19256	5.94025	3.50073	9.91464	6.63026	9.1389	0.79159	0.795963	0.781555	1.59552	1.80384	1.96958	2.76357	2.8892	2.77077	13.9695	10.0456	12.0397	2.34493	2.60271	5.67478	6.89757	6.44093	4.60279	5.64064	2.64079	2.59917	5.07521	1.58568	2.83802	2.33615	2.27615
1p32.3	NM_014372	26994	RNF11	ring finger protein 11	0.8045	-0.313836	1.43873e-05	0.000976573	11.2238	19.7613	23.6161	20.1226	20.7061	26.2528	12.0291	17.3636	25.61	31.1724	33.736	34.6191	23.3844	28.4227	22.7423	37.1327	35.4664	32.8215	30.4266	30.0209	33.5824	23.4779	29.5514	28.2011	26.7733	23.7762	23.5695	18.8323	14.2506	31.6248	27.2401	30.6358	23.9163	24.3661	27.837	33.3046	30.6952	26.3877	31.1641	24.1741	19.882
Xq28	NR_000011	26778	SNORA70	small nucleolar RNA, H/ACA box 70	0.816796	-0.291952	1.54733e-05	0.00104319	1170.93	547.266	173.189	1894.08	1223.08	1053.56	722.516	1080.93	987.597	1982.85	1414.87	1457.57	824.531	1698.62	915.084	1211.75	1037.78	1335.54	1345.18	1393.91	1406.38	1889.41	906.209	1564.12	2030.67	2449.08	1824.99	1734.75	2462.66	1854.73	1206.97	1257.52	1420.87	945.721	1179.46	1322.44	1187.35	1317.3	1126.34	1285.48	1638.75
12q24.23	NM_207311	92558	CCDC64	coiled-coil domain containing 64	0.728149	-0.457694	1.60202e-05	0.00105861	4.89113	2.16636	4.02086	3.0386	1.80581	1.81215	5.86681	3.30307	4.18249	4.49666	5.07158	5.34331	2.74121	3.85009	3.64469	8.19731	8.85286	9.39359	4.86983	4.88931	4.54062	4.56137	3.1077	3.93588	4.88382	4.62373	5.31931	5.2586	5.85524	3.32906	6.28682	6.8483	6.13208	4.20971	4.45192	3.54016	4.99994	6.33668	4.81175	4.48406	5.12804
12p11.21	NM_144973	160518	DENND5B	DENN/MADD domain containing 5B	0.754095	-0.407181	1.58489e-05	0.00105861	2.40488	3.60147	3.52631	3.4232	3.37205	5.05714	3.40337	4.79772	5.39866	4.81329	4.81966	4.03127	6.0949	5.15364	6.25272	7.13615	7.54765	7.16987	7.45537	8.16685	7.62067	4.68257	4.23918	5.52468	6.0965	5.25087	5.45187	3.499	2.70883	5.16101	5.95825	6.51883	6.00146	6.46433	6.3791	8.09725	6.41279	6.51594	6.32492	3.32045	3.27162
17q11.2	NM_000984	6147	RPL23A	ribosomal protein L23a	1.04215	0.0595622	1.59438e-05	0.00105861	464.029	617.245	1012.7	1086.97	916.678	723.763	469.516	736.205	623.333	551.885	662.748	523.614	650.835	568.541	670.487	292.662	268.185	248.416	580.936	536.76	612.227	316.683	498.294	451.975	684.651	660.315	675.917	275.76	314.743	398.371	609.877	569.571	500.442	740.3	598.077	585.204	452.519	299.334	434.706	536.562	392.623
20p13	NM_001301188	57761	TRIB3	tribbles homolog 3 isoform 1	1.32079	0.4014	1.63032e-05	0.00107022	21.717	81.5562	17.2906	19.1217	29.5948	21.6501	22.6276	15.4819	33.0929	13.4218	12.6103	11.2251	7.03798	21.8599	13.3949	6.93227	6.85373	8.07533	18.9026	14.1938	23.9217	8.12444	15.2647	10.5136	13.4525	14.0899	16.0391	13.4569	12.6442	4.33517	24.2928	28.5714	25.9703	29.7726	18.0409	18.2208	18.5935	12.2271	12.2395	16.977	16.8162
1q42.12	NM_018212	55740	ENAH	enabled homolog (Drosophila)	0.718696	-0.476547	1.6631e-05	0.00107061	3.0565	5.53575	3.86487	2.87062	4.93102	9.34613	4.53379	3.6959	6.50583	6.48786	7.02313	5.30697	9.28256	9.22701	9.56392	8.423	8.58372	8.36434	8.72326	9.56389	7.80198	7.4466	7.89181	9.05814	9.04935	6.45761	6.87806	4.18195	4.00639	6.70602	6.86585	8.02462	7.29604	8.11917	6.90303	9.86244	6.46212	6.74096	6.85381	4.34552	5.35837
Xq28	NM_001493	2664	GDI1	GDP dissociation inhibitor 1	0.830763	-0.267491	1.64369e-05	0.00107061	62.613	41.6036	45.7627	22.8632	49.1318	55.3092	76.9654	39.8869	33.6278	53.439	67.9109	76.7279	52.2615	78.5991	43.6766	120.376	122.18	122.818	68.7938	59.0202	60.9414	95.4122	80.5605	85.9615	67.2524	60.3099	62.1705	60.6911	67.4587	56.9966	60.633	71.6761	58.0308	53.273	55.7371	55.5559	70.3605	83.2514	74.3487	49.5633	45.719
5q14.3	NM_001884	1404	HAPLN1	hyaluronan and proteoglycan link protein 1	2.1341	1.09363	1.66141e-05	0.00107061	0.124005	140.377	27.6307	23.107	12.242	14.2486	0.172513	0.844008	17.272	3.95293	6.33735	3.66368	5.60306	2.45483	4.47106	0.095784	0.136243	0.087069	2.96451	3.70481	3.04907	1.56439	1.08751	1.63622	5.11872	4.40995	3.46178	0.377776	0.514229	1.99523	5.40635	4.39041	4.03288	9.64081	5.61904	6.60599	4.18732	0.982955	2.26623	1.74373	0.57004
3q29	NM_005929	4241	MFI2	antigen p97 (melanoma associated) identified by monoclonal antibodies 133.2 and 96.5	1.90773	0.931854	1.67714e-05	0.00107273	1.26107	3.94545	4.5669	4.44804	3.60458	3.09567	0.322078	0.287885	5.46205	1.41103	1.49267	1.42671	0.986781	0.953057	1.27827	0.063974	0.138783	0.090534	1.89292	1.49901	2.41052	0.916177	0.396207	0.512662	2.06585	2.66712	2.86191	1.007	1.1904	0.633905	3.13056	1.90447	2.17968	3.10384	2.02271	1.5628	1.09823	0.513598	0.665598	1.07423	1.08394
Xp22.33	NM_015419	25878	MXRA5	matrix-remodelling associated 5	1.97542	0.982157	1.71302e-05	0.0010887	6.97243	11.8053	6.8452	2.64405	8.40396	11.1802	3.42369	2.29314	7.56989	3.27196	3.55935	2.13901	5.38912	3.71621	5.76961	0.229012	0.305763	0.250146	1.06063	1.40742	0.819451	2.46622	1.47912	1.79121	3.61162	5.81366	4.55897	1.49946	1.762	2.67358	2.68468	2.09716	1.95644	10.3733	4.67469	3.96361	2.88766	1.41025	2.14818	3.23875	2.79931
11q14.3	NM_012124	26973	CHORDC1	cysteine and histidine-rich domain (CHORD) containing 1	0.59134	-0.757941	1.76613e-05	0.00111535	1.28122	3.11643	2.76554	2.35593	3.62736	6.81501	2.23145	3.72398	4.0841	4.55964	4.21167	4.2744	12.6631	4.94514	7.33014	5.91033	6.58937	5.08784	8.18899	8.99909	8.50838	4.2572	4.2519	6.66934	6.43094	5.81846	5.25572	3.33813	3.40471	4.69484	6.24038	7.38966	7.32313	7.13346	6.23782	9.85913	9.09035	10.0245	10.8395	4.28527	4.60518
Xq28	NM_000202	3423	IDS	iduronate 2-sulfatase	0.710139	-0.493826	1.78414e-05	0.00111963	4.25701	15.338	7.74512	6.43722	8.7624	10.9082	12.2043	9.24461	13.7347	20.1106	20.6309	19.4029	11.0074	12.9615	13.0146	33.824	36.1502	39.1415	10.5233	9.35452	10.6568	20.7023	22.1897	20.4705	14.575	14.621	15.0468	10.9496	9.65804	15.2603	15.8108	16.4004	16.3071	14.1285	18.2324	19.5755	16.5452	20.4717	17.4163	9.90738	10.5222
14q24.3	NM_006821	10965	ACOT2	acyl-CoA thioesterase 2	2.41767	1.27361	1.85234e-05	0.00112453	7.02547	4.65487	4.91063	3.65355	5.26694	3.07742	4.70399	3.68067	5.59574	3.26199	1.73705	1.52098	2.10653	1.94862	2.53571	1.31937	1.23981	1.56262	2.40641	1.49096	1.66367	1.14539	1.59996	0.839833	2.41486	2.96675	3.02278	3.24791	2.6861	2.66405	1.88403	1.53567	2.11355	1.98544	1.2774	0.410687	2.0048	0.797187	1.15867	1.56419	1.89505
16p11.2	NM_006319	10423	CDIPT	CDP-diacylglycerol--inositol 3-phosphatidyltransferase	0.723052	-0.467829	1.84188e-05	0.00112453	12.7794	14.8893	13.1711	14.6447	10.2561	10.637	12.8003	5.46312	14.5629	17.5587	17.4079	17.4056	16.4736	14.0407	14.3548	13.7334	13.4368	16.1912	25.0931	22.7076	29.3546	14.3687	14.6398	15.6819	23.5806	24.8882	26.3902	32.8042	27.4117	16.4193	25.9811	24.7505	24.9567	26.4944	23.3732	16.0884	24.1465	19.9585	20.6387	26.691	23.831
14q22.1	NM_006832	10979	FERMT2	fermitin family member 2	1.65894	0.730258	1.87396e-05	0.00112453	3.50122	21.5262	17.8789	16.3946	24.904	27.4254	6.6332	9.9427	19.8654	9.74529	7.28474	5.45769	21.3708	8.78749	11.199	1.21441	1.68554	2.24933	8.88499	13.7866	15.5136	6.47008	2.53599	7.21503	17.6778	15.0833	12.2953	3.35931	3.0911	8.44276	9.41878	6.53254	7.43789	17.1366	10.3625	12.4788	7.11432	2.44934	6.57897	3.71117	3.20633
6q22.32	NM_138571	135114	HINT3	histidine triad nucleotide binding protein 3	0.763211	-0.389847	1.8821e-05	0.00112453	4.74288	8.00885	6.40119	6.05175	5.8366	8.1514	6.53462	10.0366	8.99513	13.1585	13.3345	13.6575	8.42564	12.3416	8.96047	16.8383	16.571	13.733	7.63635	9.39408	11.613	8.74627	12.4399	14.7471	10.2244	9.31608	9.38985	6.2605	4.89811	10.7027	10.5119	10.7086	9.32536	9.89855	11.1162	13.1766	13.0896	8.71206	10.97	7.80208	7.68871
6q27	NM_001040000	4301	MLLT4	myeloid/lymphoid or mixed-lineage leukemia (trithorax homolog, Drosophila); translocated to, 4	0.5461	-0.872762	1.87477e-05	0.00112453	1.49865	2.08867	1.07188	1.05064	1.79827	3.20919	3.84057	3.64628	2.21334	6.25789	9.23573	8.93033	4.58377	6.73928	4.51164	10.998	12.3136	12.2371	4.37227	4.83021	3.04868	7.44117	4.73947	6.20244	5.15422	4.04686	4.27855	1.67552	1.59713	2.9833	3.07887	4.08877	3.92663	3.70769	4.47259	5.18422	3.0225	4.46948	3.59534	2.44729	2.36357
9q31.1	NM_001198812	100526694	MSANTD3-TMEFF1	MSANTD3-TMEFF1 readthrough	0.635722	-0.653532	1.86836e-05	0.00112453	2.26627	5.09441	7.51858	7.83751	7.47634	14.5905	11.4909	24.9991	7.22461	22.2057	18.1773	18.6444	22.8247	26.043	13.9311	27.4322	27.2504	22.3787	20.536	20.2543	18.8598	14.0388	18.132	21.3834	11.2672	13.536	10.9648	8.83171	7.86291	11.9726	11.1306	12.9318	13.339	15.9973	16.9913	21.784	16.5352	16.938	18.7755	12.0115	10.6784
16q22.2	NM_015020	23035	PHLPP2	PH domain and leucine rich repeat protein phosphatase 2	0.757751	-0.400205	1.84999e-05	0.00112453	1.09918	1.47535	1.49945	1.15521	1.58429	2.00731	2.04897	2.13145	1.55323	2.78749	3.7151	2.5381	2.599	2.2181	2.26797	3.82097	3.90878	4.08206	2.50553	2.79811	2.65081	3.56389	2.39534	3.06889	2.70566	2.09098	2.18707	1.5456	1.32769	3.22101	2.27243	2.52278	2.28764	2.66915	2.74321	3.42944	2.21351	2.36925	2.62429	1.48328	1.19135
9q33.2	NM_005047	5711	PSMD5	proteasome (prosome, macropain) 26S subunit, non-ATPase, 5	1.51357	0.597953	1.85461e-05	0.00112453	3.01694	8.51587	8.51145	10.0214	8.80192	8.36972	4.40978	7.875	12.4592	6.44768	6.40523	5.71489	9.5661	6.18855	7.88919	4.40643	3.92073	3.70373	4.75855	5.53356	5.52418	3.08934	3.80792	4.29392	7.53895	6.19668	7.44458	0.830668	0.699857	1.04152	6.02694	5.62549	5.4984	5.78069	5.90955	7.05309	4.14324	3.27312	4.30594	2.53611	1.83997
9q22.31	NM_001003800	23299	BICD2	bicaudal D homolog 2 (Drosophila)	0.750225	-0.414604	1.97822e-05	0.00117492	4.64333	4.01352	4.58674	3.59885	2.98012	4.20164	5.82774	2.8166	3.60686	6.14186	7.4814	7.85185	3.33001	6.65356	4.16594	10.9708	11.4904	11.7975	6.49656	6.03329	6.44504	7.29293	6.93274	6.36274	4.54758	4.36546	4.577	4.9572	4.52306	6.50868	5.39381	5.97117	6.25575	4.9156	5.6984	5.92341	6.33236	7.35056	5.64359	3.40575	3.57928
13q33.3	NM_032859	84945	ABHD13	abhydrolase domain containing 13	0.71696	-0.480036	1.99576e-05	0.00117833	1.36195	2.78138	2.85899	1.78345	2.10414	2.74703	0.974556	1.76659	3.93287	4.79374	5.82272	4.80967	3.4828	4.53641	3.62168	3.265	3.41152	2.62023	3.10141	3.28109	3.69873	2.96321	2.77004	3.33189	3.84695	2.9994	3.12877	2.68102	1.94434	4.58297	3.26009	3.90897	2.90566	3.49615	3.39206	4.49975	4.08535	3.57783	3.87661	2.77413	2.26069
22q11.23	NM_001084393	100037417	DDTL	D-dopachrome tautomerase-like	1.92832	0.947347	2.0351e-05	0.00119448	3.506	4.87383	4.44418	4.88521	3.17516	2.40293	5.68665	3.69216	3.76573	1.70041	1.79245	1.67953	1.68283	2.1884	2.2273	1.61212	1.37246	2.33375	1.28027	1.42792	1.44841	1.82587	1.84611	1.29161	1.9005	2.8195	3.67051	2.44735	2.38407	0.873563	2.41499	2.27501	2.1829	2.37696	2.78442	1.41961	1.75517	0.950882	1.38601	1.59939	2.2991
16p12.2	NM_020718	57478	USP31	ubiquitin specific peptidase 31	0.862195	-0.213913	2.04752e-05	0.00119474	1.20282	1.8882	1.38322	1.12448	1.38838	2.11332	1.62817	1.56398	1.95287	1.88406	2.0414	1.58208	2.65383	2.56656	2.4457	3.39417	3.71654	3.62091	1.78821	1.93595	1.70569	2.67754	2.04864	2.48927	2.04882	1.9171	2.33683	1.40793	1.5103	2.54144	1.92057	2.15892	1.78221	1.97527	1.92282	2.34894	2.54359	2.76854	2.58567	1.36736	1.45499
14q32.11-q32.12	NM_001080414	440193	CCDC88C	coiled-coil domain containing 88C	0.737033	-0.440199	2.15764e-05	0.00124516	2.39979	2.79215	2.8701	1.34279	1.54469	2.04189	2.14243	0.835308	2.559	2.69907	3.36045	3.66681	1.51102	2.73378	2.27409	4.47638	4.26319	4.5955	2.94523	2.72113	2.72373	3.01338	2.38453	2.30491	2.64266	2.72903	3.09241	4.47258	3.76736	5.02291	3.07846	4.19086	3.41491	3.02545	2.81079	2.27274	3.90379	4.3243	4.13399	2.19969	2.21942
6q14.1	NM_022726	6785	ELOVL4	ELOVL fatty acid elongase 4	0.660726	-0.597875	2.15888e-05	0.00124516	2.10103	4.06413	1.9142	2.05455	2.08502	3.32457	3.45344	6.18979	2.10642	5.52156	6.426	5.60083	3.98199	6.01157	4.30112	13.4079	13.5423	10.7672	4.02409	4.38441	4.33492	3.23605	5.55287	5.82519	4.25256	3.48791	3.86313	2.51253	1.89306	5.59604	4.2216	4.25618	4.02344	4.3314	5.72028	6.09554	6.34736	5.01491	8.25796	4.42286	4.25494
3q29	NR_003264	255812	SDHAP1	succinate dehydrogenase complex, subunit A, flavoprotein pseudogene 1	0.742111	-0.430294	2.18392e-05	0.00125237	1.84529	2.78428	2.22668	1.30075	1.45239	1.90736	3.94473	3.20934	3.63314	2.96015	4.22201	3.75729	2.49353	2.81697	2.34541	4.34473	5.48332	5.80563	3.04033	2.98092	3.18636	5.0895	2.50525	3.96893	5.17046	4.42705	3.61827	3.11118	2.89307	4.64019	3.41869	3.95919	4.0438	3.68217	3.20466	3.63425	4.0798	4.75019	3.85513	2.25133	2.36718
3q21.1-q21.2	NM_001024660	8997	KALRN	kalirin, RhoGEF kinase	0.70396	-0.506435	2.21016e-05	0.00126017	2.24809	1.9614	0.9605	0.777899	1.50444	2.79323	3.31297	1.95252	1.68131	1.67412	2.42358	2.16169	3.18943	3.86248	2.72305	5.77626	6.20224	5.99696	2.43375	2.54867	2.04671	6.36817	3.44429	3.78079	3.00742	2.63129	3.37645	2.9621	2.87739	3.69433	2.3366	2.85666	2.49876	2.91614	3.59517	3.45881	2.63754	4.02261	2.5249	1.90186	2.32839
12p12.1	NM_005504	586	BCAT1	branched chain amino-acid transaminase 1, cytosolic	1.64798	0.720698	2.28551e-05	0.00126734	2.83474	17.8586	12.7089	12.5457	20.8791	23.6684	3.29407	6.59152	19.5509	4.65977	3.29486	1.08398	15.8886	10.6018	12.0808	1.80523	1.03239	3.0097	4.17648	4.62206	6.81376	5.28659	2.93087	3.94036	13.6951	14.2259	15.39	1.7302	1.90347	3.532	9.42711	6.33706	6.27469	10.9987	6.80093	8.08537	4.75375	1.68675	3.65341	2.60151	2.928
15q14	NR_027410	440270	GOLGA8B	golgin A8 family, member B	0.757148	-0.401353	2.31165e-05	0.00126734	0.749858	0.860001	1.27622	0.456076	0.799359	1.47936	2.1459	1.93356	3.90489	2.07879	2.23469	2.17664	1.77649	2.04877	2.86056	4.8278	7.55043	7.27445	2.34611	3.08196	2.09862	4.11185	0.994212	2.15644	3.50879	1.6325	1.67934	1.71624	1.42199	3.71874	2.27796	2.58389	2.40586	1.70236	1.4004	2.41242	1.5382	2.35486	1.43376	0.968595	1.24058
15q15.1	NM_001114633	100137049	PLA2G4B	phospholipase A2, group IVB (cytosolic)	0.589246	-0.763057	2.28231e-05	0.00126734	1.68619	0.645201	0.001028	1.24411	0.491807	1.81047	1.83143	1.47984	0.933724	2.00436	0.980602	1.36204	1.07205	2.5746	1.38228	2.95399	4.2694	3.48021	3.77799	3.3386	2.2929	5.35404	1.39763	3.39063	3.55198	2.36231	3.59315	5.48036	3.37612	2.34346	3.13289	3.33701	3.96801	3.18306	2.24554	1.9879	2.20787	3.90248	2.19526	2.21584	2.84362
Xq13.1	NM_001024455	340526	RGAG4	retrotransposon gag domain containing 4	0.716062	-0.481843	2.3094e-05	0.00126734	4.71016	5.25931	1.75861	1.20054	2.52708	2.89727	4.23701	2.36237	2.53518	4.34519	4.23466	5.28277	3.63571	2.72295	3.38948	7.77937	8.90325	10.4159	4.7592	4.39216	4.22181	5.26917	4.25727	3.44034	2.89926	3.60844	4.22867	4.35227	5.07188	3.57554	3.4294	4.02243	3.84821	4.33482	4.40966	4.75097	4.38284	6.45388	4.21485	4.95737	6.33743
1q21.3	NM_001024211	6284	S100A13	S100 calcium binding protein A13	1.38795	0.472953	2.26888e-05	0.00126734	35.5952	75.6827	47.3061	62.4681	29.346	22.0661	43.6397	39.5825	35.8924	23.8459	20.3598	17.5695	20.1074	27.5472	24.337	5.50692	3.75126	2.36873	27.7348	18.9478	21.3318	20.0879	23.0861	17.014	25.1158	37.6104	38.914	20.0541	20.5401	6.95132	24.5924	24.0321	26.0877	43.9499	31.9655	22.0957	16.3482	12.8448	17.3392	30.527	27.1968
20p11.23	NM_152227	27131	SNX5	sorting nexin 5	1.69252	0.759171	2.30746e-05	0.00126734	5.29073	7.09132	14.6707	21.2622	13.6543	10.8418	6.26416	13.3907	19.112	6.90504	10.4996	6.53874	4.65874	9.97314	8.38824	3.80937	4.69599	3.1267	8.54294	5.34943	4.78535	5.6514	1.91861	3.1182	12.9309	9.86482	10.1122	1.91915	0.472183	2.41558	4.27971	6.19729	5.48647	4.98671	6.74624	8.85721	8.03908	7.09528	9.00239	0.928665	4.27134
3q12.2	NM_018004	55076	TMEM45A	transmembrane protein 45A	1.16205	0.216675	2.27982e-05	0.00126734	4.68939	19.9966	16.9025	16.2703	32.13	36.0236	5.22162	13.2773	10.8727	13.1349	14.2073	8.56698	23.0839	24.834	17.9598	4.63381	5.36037	3.39747	14.1233	15.1091	14.8895	8.74515	7.34424	11.1052	26.1125	21.4478	19.2439	2.85156	3.95701	8.12233	13.9113	12.0276	10.3434	16.5859	12.3494	15.2107	9.62585	5.0895	7.13401	8.53625	6.18952
7p15.3	NM_138771	90693	CCDC126	coiled-coil domain containing 126	0.796803	-0.327705	2.37616e-05	0.00128855	2.30123	2.84023	2.89356	3.16075	2.94584	3.45854	2.2121	4.12379	3.85196	4.75309	4.57172	5.62498	4.21709	4.57115	2.69838	6.27373	5.85724	5.93148	5.25502	5.1306	5.13761	3.83169	5.53617	4.66537	3.39125	2.75661	3.23862	4.11493	3.25529	5.09566	4.58421	4.30258	3.21843	3.77346	3.52408	4.68088	4.94545	3.54466	4.86557	4.69191	4.39093
Xp11.3	NM_003334	7317	UBA1	ubiquitin-like modifier activating enzyme 1	0.799097	-0.323557	2.36428e-05	0.00128855	113.491	34.2886	29.5881	22.9162	25.3953	26.0874	52.9219	19.3452	30.1193	50.51	61.6343	70.0281	22.0111	37.7218	25.4635	78.2162	77.2646	93.7056	54.12	47.8067	49.4813	39.5916	49.1906	31.3108	42.0784	40.0707	51.3867	63.0005	63.0482	41.2838	40.2845	42.8404	39.7463	56.6029	58.425	33.4821	71.0737	82.2482	56.7366	73.2733	76.4133
2q33.1	NM_024989	80055	PGAP1	post-GPI attachment to proteins 1	0.638605	-0.647003	2.41934e-05	0.00130487	3.35026	6.19233	2.48117	2.95292	3.42487	5.35682	3.11267	5.14875	2.23448	9.07686	8.73548	8.35719	5.38134	5.30932	6.06796	10.533	10.6609	10.2267	3.98287	4.9342	4.24461	7.41621	8.7021	9.06016	6.08004	5.40001	6.5343	3.84199	3.24695	7.00037	6.23372	7.4494	7.28155	7.49306	8.46627	8.61851	7.72909	8.69778	8.20516	4.64797	4.53156
7q22.3	NM_002736	5577	PRKAR2B	protein kinase, cAMP-dependent, regulatory, type II, beta	0.611595	-0.70935	2.53445e-05	0.00134514	3.76071	5.10402	2.59602	3.05255	4.24624	7.38166	6.96281	10.4131	2.37471	10.792	10.182	9.92908	7.55944	12.7848	7.60748	27.6592	23.7513	24.2985	5.32491	6.06046	5.68133	8.76997	12.0781	13.6395	9.33924	8.98189	8.56807	5.83129	4.00117	6.03293	6.73665	8.23469	6.52024	7.98682	11.1053	11.3776	8.57521	8.20115	10.7013	8.47395	7.33447
12q23.3	NM_181724	338773	TMEM119	transmembrane protein 119	1.96282	0.972929	2.5076e-05	0.00134514	15.9585	39.2682	6.06377	5.8848	13.437	13.1406	9.15052	4.72485	3.94016	2.26501	1.7923	2.1727	7.33297	10.9317	7.81274	0.340883	0.588515	0.251577	3.4787	3.17189	4.29004	4.19467	4.13469	3.99316	8.00528	7.43414	11.0362	4.67574	5.40069	2.91472	5.77862	4.50233	4.66703	8.82076	6.52729	4.2064	2.33053	1.70682	2.55038	5.87391	3.66043
1q31.3	NM_194314	360023	ZBTB41	zinc finger and BTB domain containing 41	0.668449	-0.58111	2.52906e-05	0.00134514	1.7099	3.83756	2.42188	2.13763	3.64286	5.15179	2.8004	6.81053	4.35883	5.58381	4.99663	4.82304	5.73341	7.40692	7.02552	8.67285	9.06767	8.07897	4.91521	6.31795	5.9044	5.86064	6.93643	9.78261	6.50607	6.17398	6.00583	2.73997	2.17676	5.13407	5.06643	5.76109	5.10196	4.99164	5.81313	8.02289	6.22887	5.61367	6.76762	4.52015	4.56209
16p11.2	NR_002473	440354	LOC440354	smg-1 homolog, phosphatidylinositol 3-kinase-related kinase (C. elegans) pseudogene	0.770064	-0.376949	2.56231e-05	0.00135273	1.54882	2.21125	2.06915	2.53403	2.02465	3.00419	2.83706	4.53105	3.37135	5.16705	5.2134	5.69458	4.32152	4.47314	4.49153	5.64842	5.29141	5.31332	2.769	3.21032	3.12519	3.75064	3.02091	4.21071	3.21249	3.04753	3.52865	2.26905	2.10176	3.63544	3.64212	3.87839	4.13753	3.11417	3.46816	4.36446	3.33734	3.82981	3.70461	2.5237	2.29954
9q21.13	NM_001025780	51104	ABHD17B	abhydrolase domain containing 17B	0.721002	-0.471925	2.69907e-05	0.00141002	2.5888	3.75043	3.8005	4.52996	2.61881	3.46364	3.1683	5.64182	4.72121	5.52354	8.01475	7.82357	4.81726	7.1483	5.70968	7.08023	7.19053	6.21847	3.88601	3.9164	3.95714	4.74036	7.04588	6.06436	4.64982	4.51024	4.652	4.51727	3.10407	7.11192	5.84979	5.62492	5.63512	6.56049	6.69726	5.67697	8.90505	8.28085	8.37706	6.2229	5.42922
1p21.3	NM_015976	51375	SNX7	sorting nexin 7	1.30837	0.387769	2.69416e-05	0.00141002	2.16573	8.50281	8.09189	9.58972	8.99803	8.75275	2.13577	5.53703	7.37711	3.22121	3.45178	3.39429	7.14694	7.54645	6.77391	2.05403	2.25864	1.50497	5.37413	5.07186	5.90625	2.76884	4.06667	4.42575	6.67292	5.85633	7.66509	1.75433	0.831826	4.36946	5.8343	4.85998	4.06603	7.5298	6.33818	6.65583	4.31493	2.31329	4.09351	3.56104	2.68356
15q24.1	NM_001039614	388135	C15orf59	chromosome 15 open reading frame 59	0.735105	-0.443979	2.73436e-05	0.00141553	2.49981	0.801995	1.52181	1.35167	1.09159	1.06728	2.18463	0.796959	0.662697	3.13847	3.80391	4.34978	1.45246	4.0567	1.58781	4.68106	4.44186	5.59597	2.20259	2.02437	2.06526	2.38694	2.22337	2.06324	1.62254	2.22906	2.39114	2.32898	2.77142	1.75654	1.15002	2.06134	1.24745	2.12111	2.15246	1.51737	1.89197	2.1776	1.82442	2.09565	2.35736
4p16.3	NR_003004	677770	SCARNA22	small Cajal body-specific RNA 22	0.76603	-0.384527	2.74609e-05	0.00141553	374.883	119.474	23.7838	372.153	639.104	428.987	459.88	576.649	249.524	792.043	815.972	1197	346.67	1174.58	647.496	658.23	701.213	770.888	1026.24	920.463	909.449	754.259	519.626	519.286	843.802	1057.05	1024.3	569.09	732.45	485.52	549.037	674.741	621.662	556.069	748.09	628.603	598.87	756.655	558.501	1150.33	1185.05
20q13.12	NM_006103	10406	WFDC2	WAP four-disulfide core domain 2	2.42699	1.27917	2.75218e-05	0.00141553	8.63002	9.69325	9.09081	8.90841	6.07695	4.91803	17.3616	10.2807	30.8096	4.53493	4.51653	2.20411	2.57391	3.78921	5.84807	3.55379	3.15488	2.54413	3.07136	1.33117	1.71847	1.56744	0.609243	1.00725	7.33308	6.55604	9.25496	3.71541	2.07036	1.59032	2.4682	2.9043	2.18867	4.08671	2.92044	2.7355	3.62654	4.71302	3.50205	2.14511	2.72672
8p21.3	NM_002318	4017	LOXL2	lysyl oxidase-like 2	1.96304	0.973089	2.78905e-05	0.00142498	16.923	39.7036	30.4119	22.7267	16.8926	14.1442	7.19742	4.21019	21.97	6.57081	5.99459	4.53577	5.40055	8.2224	7.95164	2.15834	2.20463	1.95344	8.77723	7.9467	8.11847	6.5709	5.45195	5.36819	6.43885	8.7588	8.68035	9.67582	10.8195	7.40963	9.99201	7.11131	7.49771	9.90628	7.89783	5.53338	2.85861	2.31783	1.90714	4.055	4.25029
6p24.3	NM_003144	6745	SSR1	signal sequence receptor, alpha	1.18286	0.242282	2.79912e-05	0.00142498	4.58069	19.9597	13.3977	14.7072	14.4499	17.1411	6.15461	8.81471	18.4517	10.9962	9.86124	7.65762	12.1081	10.1651	13.547	6.07066	6.45142	6.29142	9.14704	10.7227	10.0714	6.36495	6.12222	8.03313	12.4114	13.0494	12.2608	4.66965	4.20352	8.28177	12.0496	10.4008	11.1486	15.6992	12.9646	15.3275	6.58599	5.74402	6.61857	5.19196	5.13421
19q13.32	NM_001645	341	APOC1	apolipoprotein C-I	1.73004	0.790806	2.89498e-05	0.00143617	17.6964	8.8597	135.311	132.113	38.2041	17.1365	12.3878	22.1574	24.3516	23.4685	13.5805	10.4363	10.4552	8.50701	10.5243	2.04126	2.79244	1.30716	17.2831	11.0986	13.7595	8.6436	7.17413	8.52527	10.6707	13.6214	15.5783	10.8896	7.19975	3.86468	14.4358	12.946	14.1623	21.4203	11.3181	14.0284	5.32375	2.3001	3.36336	11.7346	14.6332
7q21.11	NM_000722	781	CACNA2D1	calcium channel, voltage-dependent, alpha 2/delta subunit 1	0.603876	-0.727676	2.84021e-05	0.00143617	2.2743	3.81232	1.55241	1.33184	3.04746	5.05564	3.64186	7.07697	1.29013	4.66355	3.94819	3.92861	6.40102	7.84692	5.9927	11.9343	11.7288	11.9892	4.6326	5.57149	4.59418	8.28686	8.76043	10.7118	4.97395	4.42596	4.8578	4.41133	3.30174	4.83105	4.58041	5.16492	4.8802	7.58404	10.4909	10.6275	5.61339	5.57037	5.68019	3.95198	4.46377
8p23.1	NR_024281	157627	LINC00599	long intergenic non-protein coding RNA 599	0.53056	-0.914413	2.87039e-05	0.00143617	1.09033	0.630133	0.481623	0.208262	1.11773	1.41441	2.53798	2.03105	0.053298	5.10274	4.8329	6.73101	1.75534	1.24166	1.41432	9.95559	14.7927	13.4951	1.6501	1.73449	0.876955	10.1511	2.54361	6.41335	2.10037	1.05853	1.4473	2.61428	2.31883	3.03115	1.60373	2.29234	2.51198	1.14896	0.763438	2.07423	2.89959	6.37627	3.21112	1.71976	1.83937
16p13.13	NM_001136472	9516	LITAF	lipopolysaccharide-induced TNF factor	1.30588	0.385025	2.88212e-05	0.00143617	16.5778	42.0212	32.6489	31.0896	29.0142	27.481	10.8771	11.7507	36.5336	13.2124	13.816	10.3031	20.4775	13.8311	15.2222	5.16519	4.79641	4.58764	19.1157	17.9823	22.8264	12.8556	13.4389	15.1159	17.1519	13.6955	14.2851	15.2448	10.2245	21.2642	21.0507	21.4409	17.4459	20.506	18.0237	15.9002	17.7269	14.2637	18.5574	12.6892	9.14064
9q34.11	NM_001032221	6812	STXBP1	syntaxin binding protein 1	0.632442	-0.660996	2.90746e-05	0.00143617	7.85941	8.06492	2.68075	2.53014	3.32516	3.71461	6.88681	4.26128	2.69089	9.94645	11.3334	11.9378	4.88713	7.60267	5.78079	11.4751	9.33946	10.0226	6.24178	7.15707	8.2967	10.0568	8.2416	9.56041	6.39352	6.93229	8.01068	6.48463	6.36945	5.55731	9.07004	11.3677	11.001	5.13984	10.6373	10.1528	6.31758	10.7359	7.22628	3.84227	5.5032
9q34.2	NM_033161	6836	SURF4	surfeit 4	1.13956	0.188479	2.90138e-05	0.00143617	64.5365	81.676	92.1493	88.3208	85.4509	69.8907	44.4172	24.9423	88.4509	47.9663	60.4792	48.9986	50.5832	45.0668	34.421	25.2983	17.0014	31.475	50.435	36.646	42.8382	28.4226	27.1052	25.512	62.0747	66.2431	64.2033	33.3902	42.7376	28.3177	56.5306	51.0723	42.4415	58.2875	52.121	38.8949	32.2267	30.8114	27.7347	38.8324	42.2203
11q14.1	NM_024684	28971	AAMDC	adipogenesis associated, Mth938 domain containing	1.17423	0.231711	2.94422e-05	0.00144716	9.16779	12.1796	18.1156	16.2646	14.2948	15.0241	9.2646	19.041	19.3094	18.8319	14.3187	11.1659	9.93271	12.7453	14.9812	5.22143	6.29676	4.43245	12.2926	15.9925	12.19	11.4325	8.43902	10.8596	18.3023	13.2718	16.0907	4.95597	6.30598	9.01388	15.8978	10.4546	12.5628	16.7984	11.538	11.687	7.77281	6.96024	8.84257	7.18628	6.22984
9q34.3	NM_201446	51162	EGFL7	EGF-like-domain, multiple 7	1.61432	0.690931	3.01346e-05	0.00145289	17.4167	15.8274	26.124	24.2867	16.7201	13.2301	11.0263	9.75539	18.6318	9.381	11.3738	8.32863	6.69581	9.47512	8.87678	2.7598	2.58296	2.79902	11.4396	10.8689	12.2641	5.75641	2.89465	3.52049	8.56755	9.16583	12.1617	13.1564	10.3702	5.99383	10.6725	11.2275	8.74133	14.4127	13.6451	7.95436	5.532	3.5239	3.10071	7.047	7.09786
17q25.1	NM_000154	2584	GALK1	galactokinase 1	1.34498	0.427586	3.01411e-05	0.00145289	25.3698	24.1899	25.3285	27.3694	16.8063	12.7209	21.722	15.62	16.7127	12.5283	12.8604	12.1713	8.90924	11.3664	13.8009	5.1671	4.47187	4.74978	11.7954	9.29484	11.5935	8.43842	8.16931	7.07518	12.1874	17.0355	17.4354	17.2134	13.9323	7.08223	15.8954	13.4453	14.5678	18.5672	15.1314	10.3397	11.4172	7.93529	8.61974	15.3238	17.0897
10q22.3	NM_001012973	219348	PLAC9	placenta-specific 9	1.99415	0.995771	3.00428e-05	0.00145289	24.5845	62.8598	8.37367	10.8818	23.8963	15.728	10.7614	14.4944	9.8417	5.3143	4.18638	3.48249	11.017	7.89196	9.58857	1.1904	0.860093	0.575253	3.50832	4.12031	4.2982	4.17395	4.10384	4.10371	13.5193	13.1074	19.4791	12.6595	14.0804	6.16333	7.70327	5.94464	6.54743	11.5033	10.761	5.01437	4.04978	3.00104	3.57012	6.15695	6.23993
14q22.1	NM_002863	5836	PYGL	phosphorylase, glycogen, liver	1.49898	0.583985	2.97774e-05	0.00145289	2.37265	15.3754	9.0154	7.19222	7.94789	7.88054	2.61777	4.76018	15.0174	4.01042	4.36547	2.64579	6.67243	4.61739	7.27179	2.33766	1.78427	1.64746	6.83849	6.3414	6.90664	2.86824	2.7633	4.03965	5.48743	5.20295	4.82109	2.32162	1.6769	4.881	6.20728	4.59567	3.48541	5.007	4.63116	4.29126	3.28216	2.15689	3.47832	3.67837	3.58595
19q13.33	NM_001193646	22809	ATF5	activating transcription factor 5	1.23463	0.304073	3.03339e-05	0.00145515	13.6985	77.0727	17.2478	11.7623	28.318	24.4372	16.6267	6.26518	15.398	9.11835	11.3456	10.8106	17.9116	16.4897	15.9365	6.52485	7.17866	5.96284	14.2074	13.7841	14.8123	11.3324	6.34915	10.4611	23.1972	23.0507	21.6796	9.10196	7.58199	6.58246	20.8998	21.9342	18.8717	25.3089	19.0552	17.2415	8.01709	8.61389	6.95352	5.91351	6.74233
20q13.33	NM_004535	4661	MYT1	myelin transcription factor 1	0.613215	-0.705536	3.04982e-05	0.00145603	3.75237	1.36707	1.41037	0.82633	1.68954	2.31128	3.12855	1.68998	0.259935	3.08935	3.70054	4.17633	2.07598	4.1058	1.60347	5.10361	5.40658	5.47984	4.04582	3.3719	3.50611	3.66473	2.88147	3.17659	4.01978	3.44527	3.36975	3.22433	2.97352	2.13223	3.72946	4.04608	4.23396	2.29937	3.20587	2.99125	2.73083	4.298	2.81961	2.59082	2.42087
13q12.13	NM_199138	219287	AMER2	APC membrane recruitment protein 2	0.502261	-0.993491	3.09555e-05	0.00147083	0.286454	1.15471	0.648378	0.213668	0.798731	1.8865	0.039266	2.63108	0.191345	3.47826	3.63412	4.75446	1.45521	3.52626	1.1557	5.64554	5.8939	4.03822	1.09297	1.18834	1.25262	3.93204	4.23823	5.3287	3.36296	3.05007	3.17672	1.29307	1.13069	2.65725	1.74701	2.19318	2.50805	1.59071	2.11593	2.22614	2.25914	2.49935	2.48974	2.88389	2.21612
6q24.2	NM_032020	2519	FUCA2	fucosidase, alpha-L- 2, plasma	1.26896	0.343652	3.14417e-05	0.00147745	5.07378	8.64998	10.329	11.7136	12.0337	11.8178	7.08043	11.3245	18.6843	5.74711	5.87492	5.26203	9.33249	10.6503	9.34461	5.26009	4.95477	4.57143	8.03968	9.69477	9.00992	5.5792	4.95899	6.09077	10.7071	9.89554	9.66947	5.3601	3.97827	8.92712	7.56683	6.32887	6.70995	9.22022	7.79824	7.81029	9.24247	5.49316	9.34029	6.05044	5.4134
10q23.2-q23.31	NM_004670	9060	PAPSS2	3'-phosphoadenosine 5'-phosphosulfate synthase 2	2.02133	1.0153	3.15055e-05	0.00147745	1.00922	38.5451	3.60995	2.3074	6.44836	6.44163	0.785684	0.883164	3.73646	1.92147	1.73274	0.465794	2.50318	2.55003	3.11748	0.493569	0.480037	0.000329	2.00687	1.69701	1.59333	1.62479	0.937969	1.3001	2.16684	2.28488	1.74086	1.26532	0.542132	2.76236	1.60341	1.82027	2.49223	1.97408	1.36049	2.65647	1.62838	1.27771	1.74229	1.86905	0.773709
19p13.3	NM_130853	5802	PTPRS	protein tyrosine phosphatase, receptor type, S	0.737702	-0.438891	3.15391e-05	0.00147745	68.9818	42.2145	21.0745	16.5527	23.0548	28.5822	44.3507	13.9497	12.0295	44.9753	43.1337	54.333	27.2826	43.4774	26.3742	52.0528	59.5889	62.8403	38.7692	37.2679	35.3226	59.569	65.5799	53.8124	38.0997	46.5225	53.0757	53.8455	58.257	35.7484	42.1376	53.0957	53.3982	43.9421	52.8599	42.3532	34.0086	48.1628	33.8513	52.3151	53.2137
12q23.3	NM_001034173	160428	ALDH1L2	aldehyde dehydrogenase 1 family, member L2	1.81879	0.862978	3.17173e-05	0.00147885	0.844636	7.99554	2.34834	1.47724	5.47478	6.64056	1.85858	2.27854	2.59484	1.06015	0.96971	0.824796	4.25662	3.2234	3.4857	0.917573	1.25102	1.21352	1.02085	1.1066	1.1244	1.62408	1.09588	2.05957	2.82787	3.64063	3.08644	0.667225	0.810823	0.823967	2.47352	2.33429	1.70747	2.427	1.60142	1.90125	0.949049	0.645376	0.860532	0.53331	0.716318
2q14.3	NM_002101	2995	GYPC	glycophorin C (Gerbich blood group)	1.39361	0.478827	3.21662e-05	0.00149281	21.4742	34.1407	21.3364	18.0191	33.0166	23.3765	14.0113	12.3177	19.9572	9.77475	11.5118	6.65082	23.3415	13.2707	11.5779	3.69096	2.54658	3.52232	17.4128	14.8085	15.8159	12.1953	12.9777	7.85675	18.0009	24.3846	24.9665	11.356	13.3479	6.5685	14.1683	12.0386	14.559	28.2938	24.9864	15.2549	10.3882	4.58234	7.6855	15.0718	11.1772
1p34.2	NM_201542	112950	MED8	mediator complex subunit 8	1.27326	0.348529	3.27868e-05	0.00151457	8.91074	14.1353	16.9496	9.76436	15.3328	15.8204	13.5357	19.3831	20.6244	10.7056	14.0931	11.4674	13.4528	20.4909	16.8764	6.80001	7.58846	4.70713	10.6254	11.0494	11.5341	7.3425	6.44588	7.13093	12.2014	13.8405	12.8918	5.12859	7.1437	9.592	11.9479	11.368	7.945	15.1409	10.4312	12.0394	7.8465	7.04856	7.60749	4.79329	3.68051
7q11.23	NM_004603	6804	STX1A	syntaxin 1A (brain)	0.706142	-0.50197	3.30223e-05	0.00151842	6.05912	3.82846	3.42692	2.63249	3.36734	3.90926	6.05448	5.02588	3.03667	8.04726	11.0294	10.8551	3.58486	5.78719	3.88456	12.5255	15.1751	15.2653	8.85772	7.80576	8.54528	7.60514	7.17942	7.01254	5.3257	5.59881	6.45175	6.71407	5.83252	3.11403	5.72672	6.6912	5.77869	4.20673	5.75403	5.3663	5.30643	6.94614	7.35622	5.48565	6.36117
15q11.2	NR_023915	3653	IPW	imprinted in Prader-Willi syndrome (non-protein coding)	0.659518	-0.600517	3.48112e-05	0.00159333	0.678042	2.00414	1.57743	0.720329	1.05376	1.78768	0.949646	1.21516	2.01768	2.02443	1.80996	1.47662	1.93271	1.43647	2.56785	2.10498	2.77716	2.47109	1.878	2.18725	1.74066	5.71588	3.03941	5.05816	1.99781	2.3572	2.1011	3.38972	2.66155	3.42878	2.13307	2.51317	2.57252	1.98078	2.17221	2.57795	3.10389	5.05788	3.39867	1.73771	2.22241
18q21.1	NR_003003	677769	SCARNA17	small Cajal body-specific RNA 17	0.80797	-0.307627	3.53098e-05	0.00160877	32.7613	70.844	26.5755	19.7838	26.8561	30.639	48.1945	42.9218	99.6824	74.6654	64.4593	60.5248	43.0325	66.6554	82.8338	54.929	68.0196	62.358	75.5247	80.5351	85.7578	74.8353	25.9653	65.1744	80.5039	68.0149	77.5292	78.0836	52.6976	56.9718	76.1238	80.4305	81.7643	62.6995	40.4112	64.8632	68.2005	82.7239	53.9375	39.9622	41.8069
16q23.3	NM_001537	3281	HSBP1	heat shock factor binding protein 1	0.877865	-0.187929	3.60498e-05	0.00162763	44.1138	48.2045	55.9337	64.3651	55.7248	65.1928	63.8197	139.621	42.4993	61.474	69.3242	58.5623	70.4685	84.51	75.0445	100.825	92.5877	77.9965	71.6041	69.7286	73.5196	48.5481	77.8398	68.7322	86.2532	75.6215	82.178	68.1133	57.9654	98.4712	78.442	81.0968	63.9019	81.7922	84.7941	74.2546	104.118	92.9178	115.929	93.2762	70.0099
4q12	NM_032313	84273	NOA1	nitric oxide associated 1	1.18361	0.243194	3.59779e-05	0.00162763	8.423	8.54712	11.673	12.3462	9.70587	9.48232	10.5837	11.9561	13.3559	7.33626	8.10523	8.89617	9.67729	6.49411	8.80899	7.22083	6.81095	7.31093	6.24603	6.80705	6.96602	5.48529	6.91585	6.886	9.78344	8.33863	9.2558	5.22129	5.73028	7.53268	8.81648	7.88815	8.03618	10.5827	11.1442	9.5239	8.53741	6.96325	9.46094	7.38466	6.21239
6q27	NM_003730	8635	RNASET2	ribonuclease T2	1.26171	0.335383	3.69388e-05	0.00166025	9.12521	8.59835	24.4111	18.8677	24.1451	18.1621	9.77326	7.52487	11.6499	9.60803	10.4237	8.98201	13.1772	10.5837	8.36384	4.81927	4.88772	4.91771	6.27722	5.22476	6.78683	9.29725	10.0245	7.95569	14.1121	12.7525	14.609	9.81395	9.60871	6.79916	11.298	10.515	8.17261	11.1717	9.33102	8.12636	10.6658	7.19045	8.99489	8.56187	7.35913
9q33.3	NM_000976	6136	RPL12	ribosomal protein L12	1.12016	0.163702	3.74309e-05	0.00167482	1343.74	1796.09	2020.41	1834.2	1997.52	1403.08	883.966	1328.9	1365.93	1151.08	1109.5	975.229	1285.93	943.418	1096	586.562	531.911	525.88	1055.51	901.968	1001.02	648.08	898.833	696.696	1303.44	1428.62	1388.91	1091.02	1173.26	619.814	1305.8	1195.28	1134.7	1346.46	1254.71	1005.36	730.033	592.314	638.456	1133.89	1001.49
3p13	NM_001080393	727936	GXYLT2	glucoside xylosyltransferase 2	1.48044	0.566027	3.81369e-05	0.0016977	4.80778	16.7913	15.031	13.4229	15.1065	12.499	3.3707	4.46281	12.3094	7.56837	8.0953	5.0953	9.91542	7.26469	9.63566	1.22226	0.76322	0.63957	9.33545	8.54908	10.0145	3.5988	3.27628	4.02338	13.5585	9.44019	9.37435	3.79378	3.25192	7.44841	10.6566	9.16101	6.98024	10.8986	8.87567	7.86628	6.75269	3.5951	4.13533	4.25615	2.5685
19p13	NM_014884	10147	SUGP2	SURP and G patch domain containing 2	0.764135	-0.388101	3.82824e-05	0.0016977	10.0343	11.9993	12.8799	9.49498	13.1563	16.1626	10.5393	9.20968	9.24424	15.0102	21.269	19.0877	18.158	19.4954	15.3777	27.9999	27.4257	27.3783	16.9707	17.3052	17.3975	16.7188	15.3532	16.8524	17.8791	14.9011	15.0549	9.24489	9.52769	17.4143	16.3708	18.6786	15.4372	15.0441	15.3677	16.0491	20.3791	22.1527	24.4818	11.039	9.65828
4q31.1	NM_001153484	60592	SCOC	short coiled-coil protein	0.791965	-0.336491	3.90014e-05	0.00171305	10.6315	24.5573	21.0222	20.5644	18.5576	25.5943	16.6207	34.5612	30.0489	32.8963	33.2406	32.7233	25.8649	40.151	31.3212	48.9462	48.9948	37.4444	25.5788	26.8467	28.2228	21.6819	39.8378	37.6537	32.6944	31.2433	32.6303	16.8726	15.1415	34.3355	33.9746	35.5665	28.1075	30.4382	35.1752	39.8052	44.4284	29.176	41.8096	38.1882	28.3646
18p11.21	NM_032525	84617	TUBB6	tubulin, beta 6 class V	1.32943	0.410804	3.91436e-05	0.00171305	27.7619	43.1432	58.8229	43.3904	41.6576	33.1235	28.6739	21.707	39.946	33.2535	38.3388	27.3139	21.6492	30.0012	23.0043	7.72721	5.93337	7.36883	20.2439	16.5676	18.8693	21.0331	23.3892	16.8266	24.0155	23.2434	21.5277	25.5404	21.7613	20.513	23.3842	19.5949	16.8318	27.7757	21.1946	15.861	14.833	9.54427	12.809	22.9265	18.9873
12p13.33	NM_003324	7289	TULP3	tubby like protein 3	1.17511	0.2328	3.88635e-05	0.00171305	4.42244	9.23585	11.2752	6.08405	11.3548	10.6524	7.17633	5.15106	10.3133	6.43727	8.6052	6.2779	11.9071	10.8804	10.4001	5.14791	5.06053	4.44734	7.61773	6.9093	8.61374	5.27991	4.72174	5.20115	9.43614	8.45833	8.15923	2.13813	2.28702	7.25717	8.12951	9.44166	7.70347	5.95618	5.27538	5.73256	7.17501	7.14602	8.42986	3.16183	3.762
19p13.13	NM_005809	7001	PRDX2	peroxiredoxin 2	0.954495	-0.0671901	3.95655e-05	0.00171646	305.332	171.788	203.568	221.658	156.166	136.433	260.58	300.903	127.125	196.771	207.039	195.073	169.359	264.519	193.763	190.609	176.701	172.517	208.039	180.503	191.582	163.282	217.169	154.958	177.428	197.3	233.281	263.979	263.983	132.962	203.436	213.036	203.126	199.375	212.415	148.208	224.661	197.516	210.604	272.909	256.129
17q25.1	NM_052916	114804	RNF157	ring finger protein 157	0.727075	-0.459823	3.95306e-05	0.00171646	8.39315	4.69374	5.25258	3.64176	4.96866	6.23744	10.1441	5.35745	2.67377	6.86362	8.32012	8.20486	6.76586	7.90713	5.99843	18.981	20.1222	20.6834	10.6965	8.26854	9.57566	9.47057	7.9668	7.72612	5.14164	4.64341	5.81539	9.13024	7.96158	7.82647	9.45283	11.0941	9.35481	7.25071	9.2475	7.35038	7.96935	10.9518	9.16211	5.58459	5.74259
3q13.33	NM_018266	55254	TMEM39A	transmembrane protein 39A	1.36091	0.444576	4.00325e-05	0.0017292	2.62488	9.58529	9.29056	7.71024	8.65209	9.15386	2.95431	4.62865	13.169	4.68512	6.13465	4.41143	8.73472	6.1396	8.3341	1.85884	1.94419	1.57383	7.10402	6.89799	7.4454	3.91594	3.05558	4.0003	8.26573	7.50419	6.39932	2.55724	2.17927	5.00299	6.29544	5.84513	4.76585	7.84949	5.25123	5.93481	3.88747	3.22837	3.6172	3.18932	2.39188
2p21	NM_020744	57504	MTA3	metastasis associated 1 family, member 3	1.45766	0.543655	4.05191e-05	0.00174267	2.13457	4.44647	9.5857	9.7836	8.3379	9.04003	4.23686	4.89309	11.976	3.59707	4.64302	2.68276	8.15302	6.02117	7.45676	1.41584	1.60689	1.56976	9.19751	8.80693	9.30838	2.95794	1.88453	3.62928	6.10148	4.91848	5.24668	1.90561	1.55163	2.72467	4.3422	4.04343	4.03796	6.22816	4.2561	7.07786	3.94943	3.31998	4.17672	1.79287	2.16784
2p13.3	NM_001617	119	ADD2	adducin 2 (beta)	0.637841	-0.64873	4.09949e-05	0.00175534	6.06032	6.01708	4.8414	2.09615	4.31963	5.19464	8.7634	4.62383	1.60474	8.93135	11.448	6.75794	8.03972	15.1884	6.83929	14.9524	16.4588	18.6339	10.3884	9.11255	9.01958	9.90691	8.01307	8.47113	9.52941	9.00822	9.57727	5.29759	5.49123	4.39847	6.32404	8.50826	7.1891	5.83886	8.37018	7.47462	5.3201	7.78284	5.27112	6.29805	5.7574
2p22.2	NM_005813	23683	PRKD3	protein kinase D3	1.30663	0.385847	4.13004e-05	0.00175534	2.02458	6.15028	5.52955	5.52955	7.57197	8.21537	3.06453	5.64411	9.13035	4.39573	4.33001	2.8491	6.51206	5.70543	7.75612	2.21528	2.41943	2.06382	5.85507	6.01641	5.65043	3.89465	3.10903	4.45533	5.80733	5.09669	4.79983	1.78352	2.0478	3.16208	4.72103	4.39847	3.91929	6.08877	4.89975	6.41605	3.22478	2.57778	3.47179	1.83384	1.93269
11q24.3	NM_021978	6768	ST14	suppression of tumorigenicity 14 (colon carcinoma)	2.41269	1.27064	4.13415e-05	0.00175534	1.40514	1.10821	13.0359	9.00461	8.40089	5.86069	0.354432	0.071454	19.1233	0.916528	2.08384	1.31327	2.89666	1.40173	1.06307	0.041364	0	0.01566	1.64928	1.61105	1.85468	1.73422	0.990114	0.915386	2.17965	2.69956	3.15505	0.83622	1.18806	0.758815	1.981	0.847092	1.56659	3.83172	1.6791	2.15858	1.17895	0.134729	0.54327	1.36182	0.86174
3q12.3	NM_024548	79598	CEP97	centrosomal protein 97kDa	0.688238	-0.539021	4.15346e-05	0.00175607	1.62681	2.66884	1.85093	1.4361	2.47635	3.92566	2.10047	4.63056	1.98805	3.58836	3.60401	3.45529	4.46115	5.70476	4.88968	5.50236	5.12896	5.08462	3.94081	4.17631	2.88787	3.96012	4.62445	5.30403	5.03419	3.96886	4.5431	2.27444	2.05172	2.89137	3.60253	4.48325	4.20031	4.03673	4.31267	5.42853	4.17344	3.65008	4.04228	2.15094	2.27351
17q21.31	NM_001932	4356	MPP3	membrane protein, palmitoylated 3 (MAGUK p55 subfamily member 3)	0.708642	-0.49687	4.22167e-05	0.00177738	3.21556	0.438001	1.15509	0.736813	0.976521	1.36893	3.08813	2.8101	0.000115	3.66871	3.37603	4.6017	2.52046	2.18521	1.46009	5.64367	6.65874	6.70593	2.19925	1.44149	1.48225	2.64193	2.83858	2.64999	1.86414	1.73071	1.03421	2.74807	2.49537	2.55194	1.34948	2.52492	2.61813	2.0691	2.96063	2.82395	1.58558	2.47863	2.93274	1.57749	1.97268
12q13.11	NR_002968	677815	SNORA34	small nucleolar RNA, H/ACA box 34	0.824041	-0.279212	4.28647e-05	0.00179707	1148.29	243.939	55.5741	1165.54	613.384	538.146	634.547	869.678	654.609	1493.02	1279.71	1348.94	291.019	1503.96	786.038	1264.79	1175.21	1647.99	721.059	587.22	671.372	1009.38	714.396	803.509	1432.01	1531.11	1394.57	820.25	1243.51	989.935	800.392	993.971	929.779	869.278	868.827	908.53	751.675	722.117	885.146	958.335	1318.74
14q24.3	NM_001107	97	ACYP1	acylphosphatase 1, erythrocyte (common) type	0.693712	-0.527591	4.37177e-05	0.00182517	10.0303	11.1478	5.29967	6.211	8.18379	9.7078	14.4902	21.1675	3.83142	11.1657	12.1402	13.7272	14.4032	15.2436	13.4284	22.1662	22.9603	17.0127	12.9432	9.84629	11.3015	14.3502	19.994	17.9987	12.2978	12.4282	17.0787	20.2319	15.1782	9.50784	13.7558	13.5536	14.4893	13.1553	15.8493	12.5389	22.0619	19.2753	21.7864	26.6379	19.1238
1q24.2	NM_022716	5396	PRRX1	paired related homeobox 1	1.92559	0.945298	4.40672e-05	0.00183209	1.63127	13.6298	2.68994	1.04216	6.40735	7.58924	2.19056	3.85937	1.34784	1.14478	0.008498	0.222089	2.79021	2.7108	3.51921	0.538769	0.552744	0.199333	1.18105	1.27737	1.50724	2.17307	2.24006	3.91051	4.11909	2.72002	2.80586	0.834102	0.922687	2.51122	1.28368	1.96528	2.05797	2.70169	1.73469	2.50113	1.92892	1.00539	1.1209	1.54558	1.68755
17q25.3	NM_001893	1453	CSNK1D	casein kinase 1, delta	0.704322	-0.505693	4.46705e-05	0.00183915	8.5809	6.6625	4.95737	3.74508	3.99853	4.94585	6.02473	2.52837	2.7416	7.24075	7.15267	8.69498	4.8019	5.72697	5.23056	11.1745	11.0316	12.5762	8.37403	7.32985	7.79743	7.16417	6.89203	7.67212	4.68395	6.84323	6.7609	7.01215	7.94033	5.21269	8.39711	8.65975	10.0533	7.13961	9.06393	6.57911	8.39289	10.0541	7.86409	7.17137	6.64604
2p23.3	NM_014971	22979	EFR3B	EFR3 homolog B (S. cerevisiae)	0.641871	-0.639646	4.47899e-05	0.00183915	9.6342	6.94811	3.54905	2.73375	3.24658	4.37331	8.25737	2.79631	1.8434	8.85897	9.60025	9.57356	5.16005	9.28401	4.9206	13.7353	13.9264	14.8926	5.86448	4.63507	4.82405	7.81964	6.00942	6.07059	7.78096	8.94673	10.1097	8.5546	7.49702	6.00773	8.4247	11.3787	9.7003	7.22614	9.74504	7.29039	5.64704	8.24236	6.26849	5.69824	6.19254
1q21.3	NM_001030	6232	RPS27	ribosomal protein S27	1.08773	0.121316	4.45113e-05	0.00183915	3752.32	6508.87	4576.77	4636.06	5062.57	3900.2	3696.95	4420.88	3545.07	3903.14	3216.99	2945.73	3206.59	3044.74	3183.85	1750.53	1583.03	1407.87	3194.21	2763.21	3227.6	2228.01	3160.73	2639.91	3626.08	4208.34	4696.43	3608.42	3947.08	1362.4	3959.43	3657.38	3877.59	3840	4028.87	3389.54	2558.17	2099.47	2189.27	4161.99	4242.12
9q33.3	NM_005347	3309	HSPA5	heat shock 70kDa protein 5 (glucose-regulated protein, 78kDa)	1.11045	0.151149	4.52232e-05	0.00184933	26.4323	106.433	47.4785	46.0828	68.5738	68.7142	45.0548	48.4727	91.2705	42.2342	39.9731	23.9814	76.7734	76.2291	89.8091	21.2212	20.2775	25.7479	40.7286	35.767	41.7608	23.7355	18.9747	30.5185	54.1814	58.0275	57.6607	15.007	17.1371	20.636	47.2334	44.1689	47.3323	78.8005	58.465	77.2617	37.0159	33.4175	30.6134	23.4169	26.0094
11q23.1	NM_022761	64776	C11orf1	chromosome 11 open reading frame 1	1.28062	0.356844	4.75695e-05	0.00193734	11.2355	9.23615	20.3528	19.0851	12.575	9.22713	10.771	15.7122	17.7458	12.3185	11.8347	10.7485	9.76794	13.0747	10.8746	5.65197	5.40671	4.66097	9.82974	9.48859	9.0693	6.2963	7.83933	6.40383	11.2541	8.85122	9.27715	6.93664	7.16957	5.63996	13.0372	10.6664	8.91279	11.6663	10.8123	10.5835	7.17982	6.63234	8.4293	9.5965	6.37934
12p12.3	NM_015954	51071	DERA	deoxyribose-phosphate aldolase (putative)	1.38104	0.465758	4.88398e-05	0.0019766	2.17266	6.12202	13.3812	14.6229	9.02068	7.94845	4.32638	7.37519	18.0863	7.00031	6.84654	4.78531	9.65326	8.41062	7.75807	2.34446	2.75303	1.5851	7.18534	8.33834	7.56194	3.20601	4.40728	4.60029	6.92512	6.73131	6.66913	1.9299	1.77946	6.43659	4.92632	5.07753	4.68867	8.12357	6.10817	5.47029	5.5228	3.25102	4.6021	3.66796	2.88504
17q24.2	NM_014906	22843	PPM1E	protein phosphatase, Mg2+/Mn2+ dependent, 1E	0.625466	-0.676996	4.89296e-05	0.0019766	1.55743	1.05885	0.88812	1.09451	1.55356	2.55544	1.8009	5.23336	2.5e-05	2.38091	2.83629	2.42366	2.11766	2.20196	2.8033	8.40901	9.42957	9.1706	3.84886	3.7843	3.28259	3.64413	4.52855	4.38124	2.15645	2.12075	1.97593	1.93259	1.55484	2.69637	2.38347	2.69769	1.86454	2.84187	3.30641	2.5847	3.32144	3.54328	3.61345	1.82914	1.86353
5p13.2	NR_046262	646719	LOC646719	uncharacterized LOC646719	0.750467	-0.41414	4.92353e-05	0.00198093	2.00322	2.7947	2.72591	2.31291	2.85044	3.81476	3.16388	3.83645	2.35933	4.94953	4.66376	5.14759	3.58749	4.72935	3.24662	10.5121	9.90825	10.1785	4.49658	5.1766	4.84542	4.5461	5.04902	5.36384	4.38802	3.83894	3.89218	2.95626	2.40859	4.49239	3.63409	4.12115	3.47253	4.35592	5.90039	6.09318	3.48752	3.4341	3.44364	2.25811	2.23396
1q32.1	NM_001005388	23114	NFASC	neurofascin	0.54427	-0.877607	4.96439e-05	0.00198935	3.3989	1.82034	1.16142	1.08219	1.59566	1.96026	4.25528	1.05764	0	3.2904	4.20549	4.22858	2.36707	3.00286	1.44609	7.28467	7.66439	8.25751	3.2168	2.75191	2.24962	7.13364	5.02048	5.27879	1.99954	2.45684	3.14331	4.43637	4.12473	2.72757	3.62787	4.27202	4.7699	3.46471	5.30454	4.03446	2.4133	4.84493	2.87927	2.12058	3.60908
7p14.3	NM_007270	11328	FKBP9	FK506 binding protein 9, 63 kDa	1.27376	0.349089	5.04942e-05	0.00201533	9.14758	24.414	14.8201	6.1083	21.3581	21.0963	14.1888	12.7857	17.1771	8.26611	10.9455	7.93131	14.0307	14.1496	13.3921	7.62303	7.82066	7.27612	10.7974	12.0809	12.8405	9.30543	5.97765	7.88117	17.7775	16.4374	17.6065	4.29464	4.23373	12.908	10.924	11.0597	8.81112	17.8982	10.7096	10.9185	9.52691	8.32625	9.58293	4.26096	3.0106
7q32.1	NM_001219	813	CALU	calumenin	1.10981	0.150313	5.09072e-05	0.00202016	17.793	70.7697	54.5575	38.1386	70.0121	75.5508	23.3611	44.0546	73.7668	43.6134	42.6249	28.6642	72.3599	38.4753	58.1893	13.9068	13.7466	12.7922	47.6388	48.4629	51.4907	18.3367	16.1659	25.7088	56.2822	50.9697	50.8962	16.8517	15.9842	21.9805	48.9434	42.3606	40.8819	63.9411	47.3945	56.6237	31.9721	26.0798	31.1655	19.5754	20.0556
22q13.33	NM_001145135	1375	CPT1B	carnitine palmitoyltransferase 1B (muscle)	0.613345	-0.705229	5.19998e-05	0.00202016	1.57745	1.10913	1.58475	1.02364	1.42989	1.73838	4.17098	1.38854	1.76979	2.27839	1.73018	3.34614	2.71025	2.46507	2.36502	3.95814	4.48837	4.93371	4.8373	2.99645	4.78508	5.33947	1.44943	4.07311	3.11189	3.23065	3.27567	5.77529	5.7173	3.82497	4.52059	3.86568	4.40341	2.75293	3.27598	2.92727	5.78557	5.73193	3.12824	2.74675	2.73175
5q23.3-q31.1	NM_181705	90624	LYRM7	LYR motif containing 7	0.825769	-0.27619	5.14055e-05	0.00202016	1.06227	3.02391	2.22414	2.08114	1.89482	2.38194	1.61305	1.79289	1.62067	3.53222	3.99165	3.69793	3.28466	3.45657	3.55386	3.73247	3.86258	3.41406	2.29087	2.64489	2.566	2.21472	2.31964	2.58867	3.01022	2.21111	2.66195	2.04092	1.81068	3.09909	2.71443	2.55517	2.51769	2.29316	2.84646	2.91521	2.79861	2.15531	2.41244	1.82859	1.58437
1q42.2	NM_014801	80003	PCNXL2	pecanex-like 2 (Drosophila)	0.788715	-0.342424	5.17501e-05	0.00202016	2.91399	2.85966	1.58788	1.34082	1.94522	2.77604	3.54713	3.01514	2.57325	3.18186	3.82917	4.13358	2.63242	3.44412	2.35237	7.33038	7.31694	6.82513	4.01313	3.94561	4.15489	4.11655	3.57893	4.16045	3.09188	2.64086	2.86391	2.13994	2.40108	3.65584	2.92125	3.68976	3.22884	2.68042	3.21226	2.66752	3.37852	3.88291	3.8051	3.24568	2.89791
16p11.2	NM_002773	5652	PRSS8	protease, serine, 8	2.02165	1.01553	5.20325e-05	0.00202016	5.11518	2.18087	39.768	31.9821	20.3827	13.9695	2.87267	1.57659	70.0834	2.77696	3.97046	2.35431	4.99297	2.69652	4.89316	0.219148	0.173026	0.359141	4.34631	4.3791	5.47965	2.50559	0.977488	1.44934	5.73473	8.55036	8.45419	2.39684	3.43838	2.93129	7.8339	5.02514	7.55206	8.32287	5.95817	6.27621	3.32542	2.43751	3.52362	4.03596	2.77652
2q14.2	NM_002830	5775	PTPN4	protein tyrosine phosphatase, non-receptor type 4 (megakaryocyte)	0.852162	-0.2308	5.12679e-05	0.00202016	1.22957	2.26595	2.1148	1.83361	2.01065	2.71029	1.78743	2.49811	2.87562	3.13124	3.12088	2.55934	3.28287	2.71636	3.00841	4.06663	4.0704	3.58926	2.58385	3.09819	3.02938	2.458	2.48974	3.06501	3.16516	2.56027	2.59058	1.5798	1.49384	3.31073	2.58825	3.01305	2.57817	2.73271	2.84065	3.35916	2.98927	2.75567	3.32937	1.82951	1.66702
Xp11.21	NM_001039705	7216	TRO	trophinin	0.801081	-0.319981	5.17346e-05	0.00202016	11.9081	13.2467	6.95469	4.73053	6.87921	9.03743	12.99	6.83559	7.65028	9.25532	11.4595	8.98685	9.59661	12.6696	12.5289	17.42	18.6626	19.0288	10.0285	9.22652	9.17018	14.3025	10.0812	12.1725	11.8936	12.5422	13.0354	12.0982	12.9805	10.3417	13.3423	13.082	13.0802	11.8877	12.3912	9.85069	11.0117	13.338	11.348	8.95101	7.99389
1q32.1	NM_004433	1999	ELF3	E74-like factor 3 (ets domain transcription factor, epithelial-specific )	2.26747	1.18108	5.31925e-05	0.00204925	0.918707	1.30362	12.7473	8.58205	8.69841	5.04475	0.261755	0.226157	17.5856	1.78701	2.7115	2.00597	2.19851	1.87045	1.56789	0.014462	0.029486	0	1.47157	2.00456	2.15294	0.643007	0.418268	0.401072	2.41274	3.53974	3.18361	0.545003	1.11267	1.19129	1.99195	1.00207	2.07893	3.51603	1.79692	2.30317	1.0187	0.265671	0.367179	0.684795	0.665867
20p11.23	NM_020343	57186	RALGAPA2	Ral GTPase activating protein, alpha subunit 2 (catalytic)	0.819227	-0.287666	5.31845e-05	0.00204925	1.48131	2.41179	2.42635	1.74941	2.42734	3.51302	2.15214	1.66983	2.75259	2.70024	3.0108	3.11978	3.75822	2.45601	3.25668	4.36913	4.46404	4.54782	4.209	4.50014	4.06019	3.27643	2.41036	2.69159	2.92697	2.88623	2.96728	2.60017	2.08997	3.40451	3.07521	3.58557	3.07442	2.93112	2.90037	2.76184	3.22699	3.79326	3.66271	1.56961	1.69739
7p15.3	NM_018947	54205	CYCS	cytochrome c, somatic	0.741494	-0.431494	5.43245e-05	0.00206862	4.19302	8.8296	7.43236	8.54164	7.88012	11.4913	10.1259	23.5005	10.9255	22.5054	23.6119	19.5022	13.1271	21.4965	16.2114	31.0793	29.2745	26.1176	8.98569	9.81049	10.4375	10.8731	14.4005	14.8427	12.7998	11.9594	13.1786	9.15492	7.29219	13.5213	13.5129	14.8109	12.7182	14.76	16.3997	17.5775	16.628	14.1942	19.2185	10.4965	10.9922
8q24.3	NM_002346	4061	LY6E	lymphocyte antigen 6 complex, locus E	1.30128	0.379932	5.45247e-05	0.00206862	46.3591	53.3471	67.2604	67.6082	58.8418	49.892	22.6108	15.4124	71.3023	34.1874	34.114	28.5621	29.9093	24.9457	30.3059	7.02435	8.57299	8.43653	21.6355	25.2561	28.2954	16.3983	17.3005	10.1691	37.3948	47.7447	51.3416	28.0644	31.8719	15.0768	36.2452	38.6818	41.7722	37.2714	19.7011	14.7115	21.2834	12.3432	14.6186	22.3844	17.5196
6q22.1	NM_021648	23270	TSPYL4	TSPY-like 4	0.750864	-0.413376	5.39569e-05	0.00206862	16.86	15.6265	10.5107	6.89497	11.2178	14.0499	13.5971	11.9196	5.35356	15.945	16.4376	17.8571	13.7936	17.7793	15.1222	22.6705	24.172	26.3014	16.4131	14.4274	15.101	21.5479	22.912	17.8763	13.2416	15.1578	15.7004	16.9113	15.122	12.7129	17.2272	21.2352	17.7678	15.3472	19.2124	15.4881	16.1645	22.7948	15.9499	10.9267	14.1659
12q24.11	NM_130466	89910	UBE3B	ubiquitin protein ligase E3B	0.614883	-0.701617	5.43393e-05	0.00206862	1.42754	2.12006	2.97383	0.356028	1.88668	2.06577	0.906904	0.090903	6.16521	3.24156	2.37793	2.122	4.91636	1.07964	3.04289	4.15679	3.66803	3.7627	6.26066	4.4623	5.27075	4.56046	2.66141	3.20506	3.23437	2.88409	3.9263	4.75409	2.42448	5.36923	4.15827	4.0872	2.91493	4.88952	2.7728	2.19307	3.59462	3.01301	3.96783	1.81926	1.49005
5p15.33	NM_007030	11076	TPPP	tubulin polymerization promoting protein	0.687373	-0.540835	5.49065e-05	0.00207522	5.05341	3.07276	1.98319	1.27694	2.73611	3.35664	5.18673	1.81733	2.78458	3.02159	3.74133	4.14285	2.06122	3.69652	2.66113	7.21083	8.3621	10.1372	5.21113	4.19088	5.2496	5.99913	4.77503	5.28504	3.97023	3.81644	4.46641	8.51108	7.12275	5.65648	4.88737	5.72334	5.67788	3.88962	4.65552	3.32723	5.75475	6.7273	5.11279	3.52315	3.95536
4q25	NM_021227	58505	OSTC	oligosaccharyltransferase complex subunit (non-catalytic)	1.10268	0.141016	5.52713e-05	0.00208112	38.657	111.57	161.746	192.665	151.787	115.33	32.2862	80.5586	136.484	86.7791	102.494	74.0839	75.5717	87.6904	89.7461	27.4287	25.5726	22.592	54.7994	60.557	65.3033	42.6527	53.6891	58.0176	114.1	106.256	93.4206	32.2747	27.4219	67.4153	96.961	85.5854	68.8016	103.408	79.1298	96.6648	54.9974	31.009	46.8273	78.5599	34.5225
14q32.2	NM_016337	51466	EVL	Enah/Vasp-like	0.861254	-0.215489	5.66098e-05	0.00212351	61.2948	40.3747	40.7663	38.5485	34.8471	33.1546	46.6506	26.0301	21.4259	39.9132	40.1199	43.7191	37.0575	46.743	30.8156	66.4926	64.641	66.395	38.3178	34.1208	39.7396	55.923	56.7047	49.1825	46.2912	41.1086	46.6183	61.3433	64.1537	37.9158	50.6059	53.0903	50.4338	42.9012	54.3612	42.2962	41.0667	44.2015	40.0406	46.0865	55.3069
2q37.1	NM_004846	9470	EIF4E2	eukaryotic translation initiation factor 4E family member 2	1.16055	0.214804	5.76277e-05	0.00215359	18.8891	21.2093	34.9037	20.2164	27.2372	21.1145	16.6945	19.8701	32.7543	21.0073	23.8436	21.472	22.6838	22.0759	18.2386	9.27222	9.27038	6.28181	21.0209	19.2312	19.7166	12.3357	14.2056	10.5575	20.7455	20.287	20.3629	12.9343	15.5247	15.4249	22.6455	22.2162	19.1914	23.9879	18.0175	16.9854	15.0971	13.2345	14.2519	10.8397	11.4199
2p11.2	NR_004378	692225	SNORD94	small nucleolar RNA, C/D box 94	0.840133	-0.251311	5.83315e-05	0.00217176	1080.74	135.522	51.2992	985.922	439.901	447.375	876.828	749.722	490.957	1374.67	899.796	745.218	166.297	662.294	349.35	1194.88	1251.6	1234.43	375.763	587.22	340.284	735.406	511.357	753.734	996.544	830.433	795.675	1457.25	2154.24	1701.71	647.936	603.238	727.653	734.057	540.8	739.688	1092.64	1041.37	969.082	742.896	896.161
14q32.31	NM_178587	5527	PPP2R5C	protein phosphatase 2, regulatory subunit B', gamma	1.18506	0.244955	5.89548e-05	0.00217871	6.78847	12.4128	18.2895	19.1596	17.588	17.7463	14.9739	22.5667	19.7784	13.5872	12.9501	11.2378	16.8116	17.5102	16.955	10.8011	8.37147	8.96385	14.593	13.1882	16.1778	7.58636	8.79606	11.9286	12.0098	10.0996	11.4718	4.27835	3.07602	9.45217	12.1273	14.2228	13.0514	13.1211	12.1086	17.5503	12.4785	7.11827	12.1778	7.14317	6.19204
13q22.3	NM_001040153	122060	SLAIN1	SLAIN motif family, member 1	0.536864	-0.897373	5.88921e-05	0.00217871	1.57715	2.80017	1.12032	2.5847	4.31365	4.33124	4.89895	11.8123	1.18094	10.798	13.1509	13.3933	9.40107	7.27897	3.99747	18.6018	18.3217	17.5927	4.62523	4.79638	4.38498	10.2843	15.5313	13.1959	5.07647	4.24485	4.3358	3.0125	4.14489	10.2607	4.06942	6.09471	5.55003	5.44628	7.77506	9.41035	7.86834	8.17517	7.77276	5.28139	6.18739
15q22.2	NM_016530	51762	RAB8B	RAB8B, member RAS oncogene family	0.744275	-0.426093	5.94807e-05	0.00219003	4.90148	10.7099	9.08919	9.27044	8.48101	11.6479	6.4708	14.2716	10.7938	17.1077	14.2766	11.4999	12.8157	18.8063	18.3367	15.9693	14.4162	12.1601	8.63897	10.1942	10.7328	10.4933	11.3576	15.2433	21.2565	17.3232	17.4559	12.1407	8.82478	25.8919	13.4519	14.786	13.7456	15.1674	15.0944	17.9528	17.9062	12.8721	16.5043	9.75213	9.8886
Xp22.2	NM_001830	1183	CLCN4	chloride channel, voltage-sensitive 4	0.751369	-0.412407	5.97125e-05	0.00219048	2.69428	4.20692	1.85131	1.65697	2.61454	4.00616	6.01588	5.93793	2.83958	5.7011	6.72009	5.58649	4.36818	4.93422	4.1369	12.0585	12.7678	12.543	4.26353	5.15097	4.87712	4.82811	4.33601	5.34719	4.94335	3.92131	3.86909	3.27224	2.97421	4.99281	3.27167	4.45181	3.47111	4.18711	4.48916	4.24022	5.82095	5.55076	6.45731	2.73704	3.07004
22q12.1	NM_020437	57168	ASPHD2	aspartate beta-hydroxylase domain containing 2	0.779705	-0.358999	6.17744e-05	0.00224958	2.22118	2.0066	1.00423	0.886327	1.57124	1.85891	3.17676	2.45498	0.863529	2.434	2.58991	3.50101	1.93465	2.665	1.2784	7.30492	7.26657	6.69053	2.25566	2.11553	2.28593	2.70084	3.8061	3.18135	1.92209	1.92824	2.66001	2.18603	2.29936	2.63469	2.14643	1.94027	2.26018	2.26438	2.20729	2.45995	3.05266	2.85118	2.94322	2.69091	2.51179
3q26.2	NR_001566	7012	TERC	telomerase RNA component	1.30721	0.386488	6.15785e-05	0.00224958	226.881	69.4813	129.954	166.855	80.4729	62.7518	132.204	180.288	96.1818	39.4418	47.8155	48.265	53.719	53.7637	71.1604	19.917	14.9008	25.0126	114.908	89.3851	114.509	17.6808	20.9833	19.2351	50.8167	63.1331	68.423	29.9595	23.7763	17.5463	68.8981	62.4508	77.4219	39.0666	50.1514	42.3256	18.579	19.7699	19.0099	47.8308	61.8354
1p32.3	NM_015913	51060	TXNDC12	thioredoxin domain containing 12 (endoplasmic reticulum)	1.12004	0.163556	6.27647e-05	0.00227733	8.97826	19.0779	32.4843	33.1243	25.4097	24.1579	17.0918	27.9926	26.1937	17.4231	23.1813	18.4187	25.8654	23.3063	22.1873	13.0526	11.5093	11.1209	22.0155	21.3706	23.4794	10.989	14.1004	14.0307	19.3099	19.1656	18.6569	7.54784	7.79832	15.792	19.4508	17.9309	14.4463	21.0648	16.8601	18.5847	16.5276	12.9611	16.1004	14.2975	12.7644
Xq13.2	NM_021963	4674	NAP1L2	nucleosome assembly protein 1-like 2	0.669107	-0.579691	6.33401e-05	0.00228988	1.21852	1.93424	0.569784	0.731676	1.09191	2.37468	3.31784	4.74128	0.457491	2.72035	2.45043	2.47119	1.46715	3.52769	3.10731	12.7212	10.6591	10.8573	3.06106	3.41316	2.91515	3.21549	3.81121	5.0777	3.92032	2.49564	2.63623	1.68588	1.98231	2.32112	1.89708	2.11626	1.80313	2.21858	3.2022	2.83586	3.01051	2.30066	3.22123	2.13565	2.10385
11q13.1	NM_001144936	65998	C11orf95	chromosome 11 open reading frame 95	0.800695	-0.320676	6.38773e-05	0.00230097	9.89375	14.9801	11.2277	9.39016	12.6985	13.1893	11.9334	7.23904	7.37776	16.361	18.2747	19.5895	16.263	14.6781	10.1522	24.371	23.3767	25.4023	15.8902	14.0804	17.0065	13.3031	13.7204	13.0183	16.2379	14.1786	15.3332	11.5748	11.817	13.6087	13.4766	14.465	12.708	11.7629	12.4919	11.8871	14.6535	14.0984	13.3212	10.4114	10.9031
11q23.3	NM_001028	6230	RPS25	ribosomal protein S25	1.06044	0.0846577	6.66567e-05	0.0023829	902.437	1518.07	1653.48	1947.51	1687.59	1208.57	694.439	1470.19	1108.1	1108	1197.12	1094.1	1031.81	1058.02	1151.28	518.755	499.475	435.26	895.687	844.799	954.169	681.164	1121.25	909.644	1163.15	1066.96	1076.45	595.49	732.672	577.178	1366.01	1261.61	1180.48	1022.92	1021.13	1080.3	879.065	640	773.19	1101.1	878.627
17p13.1	NM_004589	6341	SCO1	SCO1 cytochrome c oxidase assembly protein	1.18328	0.242793	6.68682e-05	0.0023829	4.74549	9.59679	11.8276	14.8521	11.1935	10.2254	8.29597	12.3965	15.3064	9.53382	10.8712	8.04826	9.34104	7.74226	9.34976	7.37099	5.96288	6.29343	6.4575	9.16357	8.14874	4.97799	4.6383	6.06845	9.82453	9.29434	10.3636	4.98232	3.44189	8.56794	8.4061	8.38578	7.92014	9.29516	8.10552	9.94138	8.94449	7.93469	9.57805	6.07763	5.66126
15q25.2	NM_014300	23478	SEC11A	SEC11 homolog A (S. cerevisiae)	1.13282	0.179916	6.65847e-05	0.0023829	12.5975	37.5678	43.6563	67.7887	53.2523	48.0196	24.8991	51.4302	56.5181	30.5902	26.2724	15.6704	42.7477	35.38	50.778	20.2029	15.391	12.6044	30.6618	35.4175	31.0117	15.5602	14.1345	18.6619	53.0111	47.1633	48.3441	11.3941	11.8089	21.7428	33.0539	28.7529	25.714	51.1814	35.0225	43.439	29.8186	19.9984	30.0353	19.4705	13.1059
2q37.3	NM_005855	10267	RAMP1	receptor (G protein-coupled) activity modifying protein 1	1.8037	0.850959	6.81598e-05	0.00242028	5.70532	4.0417	16.9974	15.9365	10.822	5.02468	4.87915	2.25261	8.79271	6.59476	5.17385	5.10016	4.82154	3.58145	2.96917	1.33568	1.88272	1.5102	1.20032	2.27772	2.3186	1.3913	1.4076	1.17248	3.65717	4.78757	4.91121	1.75209	2.15646	0.946931	6.13223	4.77558	4.64508	4.42129	4.39478	3.44094	5.01879	2.90172	3.08602	4.32283	5.95371
3p21.31	NM_018031	11180	WDR6	WD repeat domain 6	0.834135	-0.261647	6.87859e-05	0.00243385	32.5901	31.7602	30.1127	20.5965	21.5871	23.6013	25.7847	10.8494	35.1636	32.1907	34.8303	34.9694	24.7854	31.6313	25.8174	29.7065	31.9017	33.9014	44.8377	42.9015	43.3419	36.8529	27.7956	28.976	36.6094	38.5556	42.5948	47.3322	45.7619	34.3318	36.4726	39.4973	37.3015	36.2341	29.7094	27.0342	29.9323	39.1604	31.9869	25.852	29.231
3q25.31	NM_007107	6747	SSR3	signal sequence receptor, gamma (translocon-associated protein gamma)	1.17167	0.228561	6.9413e-05	0.00243874	13.7112	49.3598	61.3368	66.3154	51.4535	49.2268	18.9396	39.2	58.4585	34.1892	40.9591	30.2269	33.705	37.9704	34.541	23.6672	21.3052	18.4141	19.7856	22.3208	24.1731	18.291	24.051	25.2735	37.5269	32.1906	30.3806	10.1992	9.06638	26.3569	29.6882	26.4556	23.0882	40.4965	32.7073	36.7105	23.1606	13.6652	19.7115	18.5763	14.0898
6p21.2	NM_017772	55633	TBC1D22B	TBC1 domain family, member 22B	0.871047	-0.199178	6.92953e-05	0.00243874	3.04595	2.86256	4.69869	2.66368	3.16972	3.94629	3.07155	2.72943	5.93864	3.87579	4.986	5.13889	4.86403	3.48251	3.28862	5.91183	5.65579	5.90949	6.61787	4.91974	6.36434	4.00532	3.53141	4.12544	4.06103	4.18011	4.09173	4.38268	3.41475	4.45219	4.25238	5.11214	3.81733	3.92312	3.85937	4.45817	4.21443	4.91069	4.85823	2.61865	2.87912
Xq28	NM_001018024	100272147	CMC4	C-x(9)-C motif containing 4	1.27605	0.351689	7.09972e-05	0.00248002	5.64495	15.356	10.272	9.75495	9.19325	8.51298	6.91991	10.1635	7.89559	5.61924	6.44417	5.40847	7.58238	5.51347	7.09454	5.82884	3.82874	3.65416	5.83803	5.82309	6.69415	5.78395	7.22458	5.95566	7.47676	7.83135	6.07282	6.56173	4.74089	6.32539	9.13442	6.79929	6.38051	7.85363	7.91909	6.33591	5.36179	4.94142	7.74566	8.69718	7.35325
1q32.3	NM_013349	29937	NENF	neudesin neurotrophic factor	1.26412	0.338131	7.1085e-05	0.00248002	24.0623	39.3383	24.9656	27.189	26.1405	22.9647	26.155	23.5537	20.4156	20.6053	20.4802	15.1996	17.0079	20.8263	12.7342	8.9126	5.41381	7.119	17.9547	12.6723	15.1926	13.4837	12.9423	9.77416	17.1301	21.2765	19.2086	23.4171	22.5196	10.7135	15.5614	15.7469	16.4112	25.3885	20.5236	12.5799	17.4653	14.7799	15.3269	18.8538	22.6162
1q32.3	NM_014053	28982	FLVCR1	feline leukemia virus subgroup C cellular receptor 1	0.758141	-0.399461	7.15363e-05	0.00248442	1.30876	1.47645	2.62386	2.46953	1.80937	2.16074	1.54173	2.23154	2.04	2.66908	3.09764	2.74125	2.99657	3.04716	2.75384	3.32658	3.51461	3.317	3.56381	3.9104	3.56	2.61156	2.75546	3.1272	2.32971	2.03724	1.99036	2.21513	1.36459	3.85487	2.978	3.17421	3.03245	2.55028	2.93321	2.87903	3.29736	3.62237	3.81579	3.05645	2.6976
22q13.31	NM_001135862	112885	PHF21B	PHD finger protein 21B	0.536966	-0.897097	7.19375e-05	0.00248442	4.93959	2.50133	2.4193	2.87388	2.52552	2.8588	6.54178	0.128155	0.776597	5.42318	5.24274	6.93901	6.10414	9.00648	2.55092	5.07533	7.1084	5.97136	7.08267	5.16812	6.51992	9.49899	7.57022	7.41837	5.37355	5.4427	6.67998	5.46382	4.13908	4.02462	6.08982	6.94217	6.76649	4.87064	5.04709	4.97181	4.92716	5.67494	3.40517	4.71131	5.7111
16p13.13	NM_003498	8303	SNN	stannin	0.781962	-0.354829	7.19579e-05	0.00248442	33.8434	14.2875	16.0968	19.7546	13.2866	15.2678	23.0185	10.5988	7.56309	27.8635	25.229	29.4223	13.5769	24.4117	12.3633	51.1435	50.6295	53.4893	18.9981	17.5182	16.1406	28.4012	36.4977	25.22	18.1099	18.1929	22.027	27.4893	29.0939	17.2246	17.4876	18.5928	16.3652	17.8932	21.2039	18.2885	20.1085	21.5205	20.4072	21.5994	20.6857
16q24.3	NM_000977	6137	RPL13	ribosomal protein L13	1.05462	0.0767269	7.28453e-05	0.00250638	365.267	447.656	287.547	316.783	322.858	229.013	284.971	219.914	182.247	231.284	211.689	208.257	173.273	151.291	149.247	113.256	97.7922	108.856	180.903	150.163	175.156	131.954	187.966	151.533	203.593	246.425	292.095	219.412	237.918	100.211	250.799	224.31	241.893	234.172	242.739	197.881	172.571	130.39	146.934	232.96	242.707
11p15.4	NM_001190702	100463486	MTRNR2L8	MT-RNR2-like 8	0.852014	-0.23105	7.33549e-05	0.00250971	714.521	339.441	1242.93	1501.2	1001.19	886.185	1076.42	1314.3	954.821	1395.5	1147.87	1373.33	796.953	1534.04	1171.36	1333.31	1324.98	1199.9	1046.63	1033.99	1063.29	814.7	1740.28	1352.45	1045.31	1064.78	1121	1526.46	1821.37	1984.86	1809.98	1420.92	1414.98	971.361	1061.94	1278.21	1774.59	1105.01	1928.74	2004.54	1645.19
6p21.31	NM_007104	4736	RPL10A	ribosomal protein L10a	1.04619	0.06514	7.36967e-05	0.00250971	706.08	928.931	1152.89	1425.46	1159.19	906.567	646.781	1236.33	919.772	771.271	969.872	869.294	654.44	727.947	732.645	497.242	460.612	416.516	756.549	707.82	737.474	540.566	778.802	615.722	1007.13	894.093	908.572	456.994	579.93	550.269	835.547	757.117	705.921	857.489	734.966	766.881	633.156	464.123	544.43	782.547	533.909
3q21.3	NM_013336	29927	SEC61A1	Sec61 alpha 1 subunit (S. cerevisiae)	1.09291	0.128176	7.35194e-05	0.00250971	67.9177	112.074	97.0189	87.5632	99.1788	86.6775	61.7224	54.1181	106.097	62.5957	70.469	63.1149	60.4332	64.8029	62.2859	44.4588	46.3264	50.4743	46.4614	42.5869	47.1048	50.9983	52.4343	44.3684	64.4936	73.348	73.7337	51.8203	50.3234	48.481	70.2205	69.2899	60.5649	86.1671	60.6181	57.7996	48.7226	47.5226	45.2822	41.717	34.334
4p16.3	NM_178557	339983	NAT8L	N-acetyltransferase 8-like (GCN5-related, putative)	0.693841	-0.527324	7.693e-05	0.00261091	4.19377	4.39915	1.21489	1.36108	1.35343	1.45763	3.99769	1.57087	0.733881	3.67007	3.79443	4.07481	2.26825	2.1524	2.00464	6.11374	5.3809	7.45632	2.36925	2.17046	2.69425	3.86507	3.18036	2.94867	1.89147	2.46502	3.04328	5.21867	4.24112	2.66065	3.40541	4.30133	3.90746	2.52279	3.47306	3.07242	4.13832	4.39677	3.61016	2.87869	3.67814
16p11.2	NM_007317	3835	KIF22	kinesin family member 22	0.699457	-0.515693	7.87577e-05	0.00265488	13.9481	9.45654	10.8445	11.9761	9.27551	7.22822	13.0474	7.73056	5.7716	17.829	15.7772	14.5396	16.409	31.5772	22.1317	13.197	12.7625	14.529	15.8226	12.9574	14.3374	18.6426	20.1158	15.3475	14.2937	17.4701	20.5547	16.3111	16.2503	8.0867	20.3133	19.7993	22.6005	20.4549	19.3541	15.9216	11.3266	11.3267	8.64602	17.7805	19.0984
17q25.3	NM_001282281	5831	PYCR1	pyrroline-5-carboxylate reductase 1	1.35532	0.438634	7.86347e-05	0.00265488	28.9937	60.14	27.4167	45.2513	32.982	42.7838	25.3663	16.204	18.6503	22.739	31.9104	18.8739	21.2093	12.1415	6.04862	6.66669	3.07065	1.36811	9.29314	13.9541	20.0286	17.6012	17.9397	16.772	25.5008	28.0728	30.0164	28.6423	21.7682	8.55899	26.7314	30.9605	30.312	33.5272	28.768	19.1796	20.2063	8.16855	13.9777	18.0765	7.11066
17q21.31	NM_173079	146923	RUNDC1	RUN domain containing 1	0.827012	-0.274019	7.96888e-05	0.00266824	4.50594	4.4843	3.91868	2.79049	3.9149	4.96744	4.40047	2.81951	4.07156	4.78154	6.1583	4.84206	4.81385	5.80537	4.59991	6.75801	6.84419	6.8413	4.83766	5.56821	5.611	6.06142	5.03951	4.70478	6.10074	5.2183	5.37055	5.02893	3.35851	5.08667	5.3723	6.08104	4.79629	5.10115	4.96706	5.04898	7.22158	6.61622	5.98611	3.16782	3.42265
5q12.1	NM_020928	57688	ZSWIM6	zinc finger, SWIM-type containing 6	0.800662	-0.320735	7.95801e-05	0.00266824	4.27292	3.46036	3.35354	2.70934	3.17026	3.80043	5.00228	5.35217	3.59209	3.95043	4.26152	4.24883	5.29748	6.06717	5.52218	7.05346	7.51253	7.77662	3.86332	3.57637	4.07723	6.66854	7.57857	6.39671	4.06343	3.87046	4.72698	4.22656	4.54628	7.94134	4.14282	4.86648	4.81387	4.5026	6.27898	6.51548	5.30533	5.99587	5.13634	3.61071	3.63448
3q25.1	NM_014445	27230	SERP1	stress-associated endoplasmic reticulum protein 1	1.10793	0.147869	8.07217e-05	0.00269378	19.8569	65.8586	52.8141	49.457	53.2252	49.2516	25.0131	37.5071	64.3569	44.5762	58.4378	49.8053	38.4636	44.0658	33.1467	22.8128	21.6967	20.0807	27.7397	27.5866	31.6843	20.9928	28.9623	31.8022	34.9639	31.0371	29.7538	16.1492	15.5398	27.0248	35.0931	35.3783	31.6804	38.1467	32.2302	40.4227	31.3733	19.6116	28.7809	28.9774	23.925
15q22.31	NM_002537	4947	OAZ2	ornithine decarboxylase antizyme 2	0.916069	-0.126471	8.12869e-05	0.0027036	42.409	32.802	34.5769	39.2661	31.4251	31.0722	36.6868	26.9883	31.9391	36.1073	33.759	37.5262	29.0842	39.7906	28.2486	42.6432	40.4929	36.9996	38.5584	36.202	35.7234	36.85	41.7773	37.1282	37.7418	40.7738	41.3372	53.0002	47.2041	33.9391	38.6982	40.0326	32.7485	39.7882	37.5651	30.0581	43.9485	39.7249	40.5764	32.8176	31.6012
2p12	NM_004389	1496	CTNNA2	catenin (cadherin-associated protein), alpha 2	0.592845	-0.754274	8.34873e-05	0.00274967	2.5912	4.07599	3.82338	2.79104	4.71612	8.01647	9.47307	6.65029	0.980122	9.6157	10.6079	9.4435	6.88694	7.96468	7.10609	17.9792	20.4202	20.6222	12.8609	14.0496	13.5125	10.6466	7.84588	9.34176	8.13809	6.96238	7.99876	4.25613	3.86055	7.5318	5.43234	5.35395	6.37968	8.04267	6.8062	8.74153	9.75552	10.4285	12.2587	6.418	5.21317
10p12.31	NM_022365	64215	DNAJC1	DnaJ (Hsp40) homolog, subfamily C, member 1	1.30211	0.380847	8.33764e-05	0.00274967	5.07783	13.6167	17.1267	17.561	18.2631	17.7708	8.40642	12.1482	33.4574	9.5901	10.4917	7.66031	16.9667	12.1628	14.8333	5.82721	4.64773	4.38011	16.597	17.606	19.6633	5.27937	4.37702	8.10778	17.3437	12.6987	12.2851	4.01102	4.2993	6.63806	10.2889	9.5662	8.75793	14.5894	9.74943	14.2124	8.39593	4.90431	9.03958	6.03843	5.66637
2p24.1	NM_014713	9741	LAPTM4A	lysosomal protein transmembrane 4 alpha	1.07767	0.107921	8.37742e-05	0.00274967	30.0669	79.0359	75.4998	94.2944	66.9428	61.9135	27.5566	57.08	80.3227	60.3043	64.7149	59.2351	58.3795	58.2033	68.617	23.9329	19.8495	19.6394	52.2956	51.8682	55.1027	32.045	35.9234	40.3255	66.7806	58.4107	58.452	22.2055	19.8964	37.6491	61.8214	57.7001	52.1499	57.9022	47.2506	49.8888	42.3213	31.5869	39.664	47.867	30.8218
10q24.2	NM_032211	84171	LOXL4	lysyl oxidase-like 4	2.00974	1.00701	8.35716e-05	0.00274967	2.62349	22.09	4.69916	4.1609	5.35526	5.02887	2.25993	0.641537	10.3303	2.17353	2.23033	1.6507	1.93095	2.27218	2.55674	0.160921	0.075447	0.112492	6.55516	5.49138	6.36379	0.679207	0.373426	0.503257	3.39048	3.00854	4.16824	0.919807	1.69087	1.10485	3.6283	3.3159	3.75073	2.64642	1.58829	1.53874	3.23382	1.8296	1.89292	2.98965	2.71817
7q21.3	NM_000089	1278	COL1A2	collagen, type I, alpha 2	1.17545	0.233216	8.43911e-05	0.00276084	484.031	1124.28	824.783	437.252	836.291	636.309	288.657	127.351	699.504	283.229	299.127	217.531	271.498	357.875	277.073	20.452	24.7746	17.8578	229.209	222.255	270.61	302.484	198.121	261.445	682.141	653.209	627.138	278.077	321.467	254.579	547.239	406.478	392.569	688.058	468.762	366.513	187.297	82.1316	109.102	203.144	154.841
1q21.3	NM_002961	6275	S100A4	S100 calcium binding protein A4	1.53246	0.615846	8.59154e-05	0.00280152	17.7506	18.9984	13.689	18.0259	19.3363	17.3432	16.8223	22.8384	5.33335	10.1476	9.00313	11.0914	16.941	9.73676	10.153	2.23958	2.0345	2.37546	15.2831	12.378	18.6026	6.07139	6.31811	9.61901	17.0816	14.0422	19.2068	4.59975	9.14924	3.11963	16.0426	10.5201	10.4269	15.0798	9.49772	7.3342	6.89873	2.7204	4.14885	11.8186	7.45371
5q35.3	NM_014244	9509	ADAMTS2	ADAM metallopeptidase with thrombospondin type 1 motif, 2	1.9658	0.975116	8.72367e-05	0.00283534	3.56766	4.18271	6.10805	4.25108	4.23584	3.30783	2.4566	1.17311	6.12113	2.6974	3.47806	2.04132	2.29206	1.85072	1.59706	1.03808	1.11308	1.15147	0.695876	0.689974	0.582265	1.35063	0.958036	1.18061	2.62796	3.93665	2.91692	2.03803	2.25265	1.88527	3.08097	2.63843	2.42572	4.14054	3.16946	3.05366	1.29006	0.677706	0.736053	1.18722	0.83757
Xq26.3	NM_003413	7547	ZIC3	Zic family member 3	0.557848	-0.842055	8.7621e-05	0.00283858	6.54183	6.10853	3.19519	3.36132	2.04391	2.88585	8.01253	8.31082	0.759211	4.25708	4.77877	4.21294	6.39749	13.5994	6.74671	18.5665	18.0004	18.1259	4.78686	5.24711	5.62908	12.1414	12.77	13.8785	9.09295	8.90786	9.0686	5.36762	4.32173	6.62839	5.26637	6.61499	5.72318	6.5244	8.72626	8.82144	9.97556	11.1793	10.8359	17.7873	17.5573
19p13.11	NM_024104	79086	SMIM7	small integral membrane protein 7	1.15876	0.212582	8.85035e-05	0.00285789	8.09671	17.1112	24.0407	26.9467	19.4484	18.6	11.1904	20.3162	23.4935	16.644	17.3586	12.6134	16.8701	17.1336	17.4671	11.2892	10.5012	10.5211	13.4958	13.7149	14.8199	10.5628	11.4463	9.65737	17.5545	15.2501	17.542	8.06167	7.25545	11.2094	13.0876	12.5649	11.0567	18.319	14.7109	17.9316	12.587	8.27561	9.35025	9.59469	7.31427
2q11.2	NM_025190	57730	ANKRD36B	ankyrin repeat domain 36B	0.634784	-0.655663	8.98578e-05	0.00288871	1.68887	3.21381	1.39732	1.50719	2.87646	5.09672	4.19922	7.23407	1.56392	5.56702	5.11809	4.71991	6.95995	5.07853	5.58734	9.65347	9.06903	9.15091	5.09522	5.51998	4.79902	9.06957	4.244	8.5657	4.71359	4.1425	4.33957	2.74	2.84414	3.18094	4.07238	5.24461	5.33788	5.00079	6.06259	6.1286	4.19344	6.6222	6.01152	2.67616	3.09727
14q32.31	NM_032630	51550	CINP	cyclin-dependent kinase 2 interacting protein	1.10407	0.142838	9.0037e-05	0.00288871	14.3696	16.3279	17.9503	19.9269	16.0678	15.1723	16.7761	25.8119	15.6209	15.7545	22.5701	17.0954	15.6921	15.9613	14.1835	11.2533	12.1036	9.54761	13.2549	13.5354	13.1408	9.1901	12.8009	10.7251	14.5869	15.8527	14.433	9.37412	10.5494	11.4138	17.6103	15.2473	13.0487	17.9489	17.0244	13.9531	13.4457	11.5826	13.0376	13.2694	9.29488
9q34.3	NM_013379	29952	DPP7	dipeptidyl-peptidase 7	1.48147	0.56703	9.11078e-05	0.00290928	39.1788	33.1979	43.8207	36.4004	36.7208	28.1539	25.6953	14.3349	36.5385	20.9607	21.344	18.2241	12.5436	11.4103	21.3139	3.78013	3.9871	4.18515	31.3435	25.7746	33.6072	8.82468	7.845	7.3625	29.6529	32.6053	37.8182	20.7216	16.6771	8.79942	19.4907	17.5115	17.7661	12.9399	13.0095	6.75444	15.599	13.8403	13.0721	16.0358	18.9128
6p21.1	NM_005586	4188	MDFI	MyoD family inhibitor	1.25834	0.33152	9.12613e-05	0.00290928	40.9608	95.986	47.4015	42.4135	35.135	31.5802	26.443	19.153	29.8402	16.8619	17.5824	15.7598	27.0382	25.4235	25.8207	11.9262	9.1063	10.1539	22.3149	19.988	24.2468	17.4816	19.2162	14.951	26.8326	33.1369	37.3912	25.4257	33.0727	16.2921	28.7778	25.9812	27.9301	37.9122	29.4302	23.8861	13.6243	9.55013	12.5206	25.1289	22.5901
11q23.3	NM_001130047	219899	TBCEL	tubulin folding cofactor E-like	0.627864	-0.671477	9.32148e-05	0.00295269	2.30037	2.48674	1.27598	3.33197	2.9168	3.55043	0.834061	7.67972	4.2087	5.53069	5.97717	4.23222	7.9866	7.17793	6.1994	8.78444	5.65853	4.85339	7.41334	8.59114	8.22256	3.53541	3.90401	7.01555	4.40516	4.28271	3.49588	2.50845	2.7841	6.41776	4.20042	3.7414	4.50306	5.90208	7.84321	6.81579	5.14576	5.87092	7.85711	4.03652	3.23837
8q24.13	NM_194291	157378	TMEM65	transmembrane protein 65	0.703984	-0.506385	9.2976e-05	0.00295269	3.73213	4.84125	3.41057	2.4785	3.69471	5.07768	2.04036	2.54232	3.8135	4.84035	4.10222	4.46583	5.88168	5.72094	5.66109	7.31578	8.53513	7.01957	2.48064	3.16227	3.197	6.66363	8.09824	7.51211	7.01285	5.42499	5.69851	8.99122	4.83816	14.8594	4.61873	4.64245	4.21148	6.00893	6.66389	7.0617	6.52597	6.31091	5.76052	5.33825	5.42941
17p13.1	NM_001128827	1742	DLG4	discs, large homolog 4 (Drosophila)	0.701867	-0.51073	9.4508e-05	0.00298418	24.8116	16.4628	10.7281	6.33539	11.824	12.8613	22.3554	7.18546	5.0791	21.3389	24.3119	29.8588	11.9953	16.1779	7.91505	30.9499	33.169	35.3226	18.5324	14.1216	17.5968	20.4359	22.551	21.6232	18.4503	17.7002	21.2209	28.3582	27.4908	17.7454	19.3729	21.5387	22.1842	15.6477	19.8842	17.6446	17.139	22.0727	18.3208	18.3071	19.8357
10q22.2	NM_021132	5532	PPP3CB	protein phosphatase 3, catalytic subunit, beta isozyme	0.629166	-0.668487	9.76558e-05	0.00307385	1.99086	2.65473	2.03332	2.41264	3.29336	6.11395	3.38257	6.06261	3.16477	6.54061	7.83215	8.12298	2.38445	3.78889	4.46628	15.8199	12.8749	13.6564	4.81439	4.93582	6.76923	3.75304	6.93391	9.31813	5.84114	4.35548	5.85036	4.3934	3.29657	6.68162	4.69001	8.82999	4.11949	7.11916	8.6129	8.36304	6.05936	8.40135	7.12199	2.59481	3.8689
15q11.2	NR_002824	400322	HERC2P2	hect domain and RLD 2 pseudogene 2	0.607575	-0.718866	9.80837e-05	0.00307761	1.85444	5.46404	2.1134	1.45212	3.80347	5.96801	3.53383	3.12209	7.31634	2.80897	4.01225	3.38891	10.5245	7.5028	7.39806	12.0434	13.668	13.5493	9.71978	10.1202	9.05362	10.13	4.19299	7.4397	4.65408	3.3486	3.936	5.6568	5.32028	10.227	8.22476	9.17587	8.68511	6.30784	4.6582	6.83512	12.6772	15.8741	14.4396	2.60403	3.12592
17q11.2	NM_001267776	90410	IFT20	intraflagellar transport 20 homolog (Chlamydomonas)	1.21908	0.285787	9.8969e-05	0.00308598	2.78276	11.448	15.2711	18.8315	13.9738	11.7714	5.71433	11.5719	20.5027	9.60565	14.4032	9.94995	10.7984	11.152	13.0593	4.32429	2.18365	3.79296	7.59232	10.452	10.017	4.93767	4.37753	6.03745	15.4269	11.8493	12.1939	4.29919	2.7746	6.05537	12.2768	10.9589	8.12364	13.3837	9.5054	14.2549	7.91568	4.62781	8.12149	7.73247	5.42486
18p11.31	NM_006471	10627	MYL12A	myosin, light chain 12A, regulatory, non-sarcomeric	1.22643	0.294468	9.86762e-05	0.00308598	16.0148	27.5901	65.4619	71.5025	46.1761	41.1374	20.7317	40.5157	102.294	22.9294	29.6283	17.5625	39.3605	27.5788	39.9597	9.48387	10.0882	7.61185	28.8975	34.2736	38.5409	16.985	12.3869	14.5422	39.0531	29.8258	35.3322	17.3327	16.612	29.3706	25.0183	23.2922	21.1773	39.4862	28.1812	23.5946	39.8089	24.3457	34.9442	17.8295	18.5108
9p21.1	NM_002197	48	ACO1	aconitase 1, soluble	1.09565	0.131794	0.000100711	0.00313051	4.85765	7.93508	10.4334	7.67922	10.5414	10.3079	6.38176	7.81372	13.0905	7.60313	10.4423	7.1949	9.69117	10.1003	10.3037	5.28976	4.53704	4.78951	9.75116	9.21575	9.95004	5.86485	4.84534	5.85227	9.65553	8.0526	7.99505	2.97516	3.22029	8.79102	8.856	8.28059	8.45023	10.6726	7.5533	8.30553	8.44361	7.02878	8.84219	4.62836	4.48088
14q24.2	NM_014982	22990	PCNX	pecanex homolog (Drosophila)	0.797193	-0.326999	0.000101817	0.00315505	2.15153	5.10495	3.17551	2.75098	4.40554	6.09224	3.33595	4.05955	6.03066	5.09064	6.01804	5.04759	6.31928	5.44526	6.06889	6.87392	7.405	6.96779	6.81643	7.2791	6.73189	6.10768	4.97389	5.73109	5.85643	5.16613	5.10671	3.0512	2.78191	6.25663	5.00402	5.77395	5.19116	5.98172	5.50908	6.12189	5.73792	5.3435	5.64168	3.42033	3.1911
14q11.2	NM_001097577	283	ANG	angiogenin, ribonuclease, RNase A family, 5	2.26805	1.18145	0.000102757	0.00315542	5.29574	3.67861	6.55675	6.2307	8.43557	5.30198	1.82147	5.32361	1.92106	0.202176	1.81651	1.81517	0.47866	3.20429	2.00704	2.08533	1.98416	1.65257	1.71834	2.29905	1.28263	0.505006	1.58118	1.37907	1.72371	1.73257	2.57702	2.42954	3.60858	1.21314	2.46262	2.08618	2.89905	3.02116	3.08815	1.66438	2.52504	1.28086	1.2922	2.71879	1.54255
15q14	NR_027409	23015	GOLGA8A	golgin A8 family, member A	0.760322	-0.395317	0.000102164	0.00315542	0.876324	0.993042	1.32098	0.565403	1.16772	2.22974	2.32231	2.27437	4.1099	1.88467	2.21457	2.19945	2.28739	2.17171	3.37421	6.68663	10.33	9.68618	2.42893	3.38699	2.04969	5.61107	1.59118	2.98946	3.77312	1.70389	1.6677	2.38614	1.89183	5.13247	2.84613	2.9673	2.99418	1.49932	1.21893	2.12867	2.05711	3.09292	1.65401	1.13542	1.26163
7q31.2	NM_015641	26136	TES	testis derived transcript (3 LIM domains)	1.61218	0.689016	0.000102777	0.00315542	2.64419	12.2212	11.7929	8.36698	15.1814	15.6619	1.90942	2.92023	28.4679	4.22126	5.31055	2.87977	9.70325	8.4134	10.3583	2.37796	2.13413	2.21293	5.26733	5.97797	5.93889	2.73949	2.08648	2.63952	9.29	9.21128	7.95198	1.52653	1.25464	4.17497	4.31553	3.58471	4.06546	8.23915	4.0474	5.40878	3.33611	2.03726	3.14814	3.36395	2.99399
7q22.3	NM_006348	10466	COG5	component of oligomeric golgi complex 5	1.1495	0.201005	0.000103996	0.00318303	2.51323	6.68213	7.22652	6.93874	7.59631	9.09745	4.81847	7.00099	9.22774	6.22388	5.55476	4.93849	8.99036	8.36364	9.14414	4.60869	4.14986	3.68278	4.71407	5.89986	5.8962	4.33789	3.63525	6.12518	7.87232	6.8157	7.0752	2.76036	2.78433	4.62875	6.2682	5.79715	5.96494	8.50908	7.14254	7.07431	5.72255	4.22446	5.50706	3.34767	2.57965
17q21.2	NM_001552	3487	IGFBP4	insulin-like growth factor binding protein 4	1.26814	0.342718	0.000104725	0.00319556	77.2567	146.075	28.4944	36.6309	53.7937	40.527	38.3533	25.1923	19.4775	29.0007	21.5853	20.4864	33.3696	22.38	27.2213	4.59145	4.70421	5.6375	25.2846	22.0486	25.7913	23.9677	26.8851	18.5584	25.5018	33.6808	40.4077	25.5789	33.6215	14.4581	38.1088	33.075	33.7971	51.4749	44.7054	36.6022	17.5326	13.9644	12.5483	26.3258	31.5037
1p34.3	NM_018166	55194	EVA1B	eva-1 homolog B (C. elegans)	1.46834	0.554184	0.00010576	0.00321729	22.0178	68.9526	23.6448	25.0399	25.7448	17.6986	14.8804	12.8261	20.8335	10.4751	10.0158	9.96266	12.1066	9.26006	14.3299	2.18725	1.92155	2.14537	15.6982	11.7941	15.8508	7.25385	6.52444	6.35493	19.5869	21.7391	27.3152	22.1675	19.6477	9.37341	18.3041	14.6195	16.688	19.032	17.0917	12.9425	13.5983	7.11169	9.36075	12.9194	16.6738
17q25.3	NM_003258	7083	TK1	thymidine kinase 1, soluble	1.46222	0.548159	0.000106317	0.00322441	7.41901	13.4838	13.2254	14.9483	13.008	11.4863	5.65109	3.91265	4.93308	6.42567	8.0629	4.47109	9.20072	13.9737	10.2158	1.54135	1.74813	1.54209	6.54786	5.18414	4.58739	7.06299	5.45433	3.59464	7.34036	10.3281	10.5728	4.66521	4.1167	3.05297	7.18696	6.23621	5.45571	11.7555	6.31071	5.20412	2.76457	1.69667	2.04185	4.01115	2.84467
Xq28	NM_001017980	203547	VMA21	VMA21 vacuolar H+-ATPase homolog (S. cerevisiae)	0.798984	-0.323762	0.000106754	0.00322785	7.28478	12.3138	13.2692	12.7551	11.3836	15.267	8.1271	14.7789	13.3079	19.1755	22.3171	21.6443	15.9416	20.7766	13.8067	25.6848	26.408	22.609	13.009	12.6557	13.1884	15.8824	21.366	18.7512	15.9084	13.5216	13.905	10.3576	8.77038	20.7989	15.4154	18.0594	14.3287	15.9461	17.7962	19.7197	17.7877	14.9386	16.5428	12.4895	11.114
3p21.2	NM_004947	1795	DOCK3	dedicator of cytokinesis 3	0.705706	-0.502861	0.000107801	0.00324968	1.67843	1.29552	0.984183	0.627037	1.28209	1.76879	3.33104	2.1655	1.57361	3.28885	3.48945	3.22329	1.40546	2.07227	1.58735	7.20149	8.14719	9.08204	1.34925	1.55646	1.14628	4.81296	2.86991	3.80289	1.97837	2.21487	2.3944	2.10809	2.03188	3.19844	2.27389	2.92549	2.56655	2.45265	2.77475	2.45674	2.74233	4.20017	2.82038	1.58136	1.48383
13q34	NM_017817	55647	RAB20	RAB20, member RAS oncogene family	2.14027	1.09779	0.000108644	0.00325541	3.49696	3.6108	5.53825	5.02802	4.09622	3.97168	2.85413	0.659641	4.44042	1.51644	1.53759	1.53935	1.32211	3.01987	1.71713	0.668805	0.484729	0.758219	2.18137	1.28337	2.12016	1.19062	1.18571	0.817656	2.80964	3.3555	2.65081	3.6141	2.63317	1.56107	1.49998	1.13434	1.52991	2.623	1.80373	1.58836	1.629	0.621833	0.800372	1.49124	1.20824
3q21.3	NM_001040653	79364	ZXDC	ZXD family zinc finger C	0.777268	-0.363515	0.000108484	0.00325541	3.48052	4.91866	3.42807	2.67448	3.90493	4.92625	5.82235	3.99338	5.42118	4.41716	6.34006	6.52404	5.43141	6.84248	6.34896	7.46199	7.82245	7.52032	7.093	6.51061	6.98639	6.97594	4.90804	7.10079	5.36308	4.79969	5.06935	3.22501	3.23423	6.4412	6.51884	6.71653	7.07799	5.45935	5.73815	5.94904	6.5401	7.96337	6.36793	4.25921	4.04853
8p11.21-p11.1	NM_152419	138050	HGSNAT	heparan-alpha-glucosaminide N-acetyltransferase	1.36624	0.450209	0.000110512	0.0032839	2.13392	5.30016	6.62634	4.76808	5.04599	5.05313	3.17283	2.13022	8.68672	3.97185	4.27738	2.55966	3.85585	3.47284	4.07076	3.3219	3.54054	3.55122	4.02966	4.27685	4.07108	3.71405	2.55981	2.82103	4.33746	4.1267	3.98469	1.46776	1.23984	2.64989	3.46453	3.50361	2.84402	5.00863	3.9103	4.2876	2.58446	2.15481	1.93151	1.57247	1.67273
4q12	NM_020722	57482	KIAA1211	KIAA1211	0.732765	-0.448577	0.000110582	0.0032839	4.64962	5.32506	4.88915	3.17523	5.11427	6.80158	4.98984	3.45247	4.33406	5.34171	7.14905	6.36527	4.88387	8.17637	4.54248	15.409	15.7398	15.9147	11.9871	10.9856	11.3176	10.2972	9.34054	8.90498	7.66635	5.39474	5.49002	5.19206	4.57238	8.0702	6.47364	8.02174	7.48703	5.67036	6.50775	6.59037	6.90777	7.68247	7.71149	4.68975	4.29978
2q21.1	NM_025029	80097	MZT2B	mitotic spindle organizing protein 2B	1.1124	0.153677	0.000110277	0.0032839	71.5181	86.4058	63.2065	78.4188	68.7343	49.5577	79.1017	64.115	41.4883	48.3879	51.0458	54.4069	32.9031	40.3165	38.5239	27.2201	22.6874	28.8631	41.8225	37.5437	47.1837	31.1694	40.5468	26.3592	52.194	66.6662	78.6847	40.052	40.1284	15.1385	50.5204	51.7332	46.8031	59.2149	61.8458	37.8214	36.7513	24.9479	31.4606	59.3246	61.9323
7q36.1-q36.2	NM_020445	57180	ACTR3B	ARP3 actin-related protein 3 homolog B (yeast)	0.736596	-0.441055	0.000113242	0.00332001	1.68404	1.97652	1.2155	0.721217	1.46792	1.44219	2.35039	2.66915	2.58839	3.75752	6.22232	4.01036	1.31501	2.84223	2.74531	6.00196	6.2232	3.97915	2.33415	2.99101	1.57992	2.24531	1.92325	1.76291	2.56412	1.73518	1.71959	3.40865	2.42401	6.29505	2.58462	3.05302	1.45141	0.815707	2.60924	3.31581	2.08559	2.77542	4.32263	1.54533	2.27708
20p12.3	NM_003818	8760	CDS2	CDP-diacylglycerol synthase (phosphatidate cytidylyltransferase) 2	0.823868	-0.279516	0.00011327	0.00332001	5.12823	5.95511	6.43254	6.03905	6.10485	7.73148	7.39219	7.2194	7.98165	6.87883	9.08537	8.90419	8.12354	10.4212	9.04292	12.5987	13.3316	14.5052	10.9534	11.3085	10.3621	10.3824	8.49372	8.42809	8.08849	8.55852	8.52946	5.15849	4.48822	9.83654	7.91286	8.9168	8.13701	9.55572	9.5974	9.84373	7.63631	9.07928	8.33928	4.99166	4.75991
9q34.11	NM_203434	389792	IER5L	immediate early response 5-like	1.5361	0.619276	0.000112488	0.00332001	9.09085	12.7535	9.90889	12.4209	7.13614	5.70714	9.33642	6.73222	13.7995	4.76	4.91657	4.36736	6.79427	4.52758	4.52276	3.27789	3.20815	5.24518	4.33302	3.81038	4.1844	3.63467	3.92508	3.31207	6.00662	6.5822	8.23684	6.92451	5.90602	3.03071	7.00744	5.78018	6.85212	5.15968	5.84283	4.82168	4.14323	2.94527	3.18343	5.77341	6.00163
2p23.3	NM_002254	3797	KIF3C	kinesin family member 3C	0.69274	-0.529615	0.000112248	0.00332001	12.4491	8.22959	6.8334	4.65781	7.29451	10.6596	16.3102	8.46775	4.2411	14.9814	18.6791	21.2819	6.21669	11.8336	7.12548	42.7188	44.4317	47.6983	13.0843	10.1031	10.9228	18.0806	14.6797	16.6526	12.0204	10.4956	11.9097	13.102	11.8214	10.896	12.4379	16.1407	14.0888	9.07809	12.9962	11.8694	11.6625	16.388	14.0004	9.72985	10.3379
6p24.1	NM_001242648	221692	PHACTR1	phosphatase and actin regulator 1	0.676608	-0.563607	0.000113462	0.00332001	3.15444	1.78199	2.60895	1.2822	2.21017	2.78778	2.81304	0.392732	1.65788	3.85982	5.37744	5.02518	4.56354	4.22278	3.78486	5.49279	5.73613	6.60566	2.91942	2.2554	2.55226	4.64605	2.80004	4.79677	3.69717	4.0668	3.46015	3.44929	3.11413	3.30788	3.42186	5.31902	4.03745	3.10857	3.41531	3.69853	2.07381	2.7166	1.85964	1.52782	1.90254
2p11.2	NR_024206	112597	LINC00152	long intergenic non-protein coding RNA 152	2.40989	1.26897	0.000114871	0.00335143	12.6304	27.1908	12.2238	14.6519	12.579	9.63364	28.1035	32.7487	33.9447	17.7272	19.999	11.6251	6.97296	8.13341	4.89188	2.02156	1.94215	2.14154	7.88195	5.70751	8.75582	5.72233	7.6852	5.19523	6.96489	9.24338	7.16382	5.39328	5.93451	3.16542	5.8445	7.38919	8.07179	6.19481	2.69345	2.26283	1.39236	2.37569	3.11749	3.4579	3.67069
7q21.3	NM_022900	64921	CASD1	CAS1 domain containing 1	0.74668	-0.421438	0.00011546	0.00335877	2.67402	4.54917	7.3203	6.4883	4.06709	5.93251	3.3225	6.63536	8.74341	6.64736	6.61526	5.32137	9.88302	10.0374	9.54734	10.7425	9.48246	8.05222	8.00166	10.0137	9.98286	6.10631	8.0263	9.19647	10.9672	8.70606	8.92762	4.02446	3.63427	8.67459	8.66929	8.32361	7.83323	9.68685	10.1525	11.0683	7.8014	6.08509	7.0651	5.33087	4.27807
1q21.3	NM_000396	1513	CTSK	cathepsin K	2.06205	1.04408	0.000115885	0.00336132	2.33465	5.61944	0.721206	1.34295	6.3025	4.80617	6.33137	16.3297	0.938034	1.11777	0.856672	0.654292	2.21447	3.15118	3.63527	0.919573	0.800035	0.476849	0.921067	1.1676	0.769661	2.94865	2.56064	2.66488	2.1264	1.95171	2.42581	0.835361	0.980516	2.06923	1.81121	1.51684	1.60668	1.60345	1.57472	1.56551	1.67121	1.63563	1.69376	1.80681	1.2377
15q11.2	NR_022011	347746	PWARSN	Prader Willi/Angelman region RNA, SNRPN neighbor	0.7247	-0.464544	0.000116221	0.00336132	2.48155	7.4071	5.61951	5.84045	5.09753	9.35527	3.53773	4.25205	4.90764	6.57959	5.98038	5.27599	8.6619	7.50417	9.29572	14.2742	14.8914	13.3376	7.13171	7.75925	5.00736	12.9497	8.69171	11.2569	8.79741	6.25946	6.73273	5.41281	5.28522	9.24782	6.8765	7.93896	8.02018	6.86885	7.33542	8.95575	8.91534	12.0965	9.99324	5.25637	4.66805
3p22.2	NM_001008392	10217	CTDSPL	CTD (carboxy-terminal domain, RNA polymerase II, polypeptide A) small phosphatase-like	1.59448	0.67309	0.000117904	0.00338192	1.92937	7.76142	5.04924	5.67678	4.4955	4.46617	2.17656	1.80312	6.94225	2.4035	4.088	2.98939	3.13779	2.7172	3.047	0.838188	1.24068	1.138	1.06647	3.30543	4.31585	2.28615	1.05449	2.09241	4.53819	3.00425	3.03353	1.60195	1.78289	3.73764	4.04121	4.58534	2.31781	3.57326	3.34055	1.5751	3.65339	1.81187	1.62595	2.64022	1.12782
1p34.2	NM_022356	64175	LEPRE1	leucine proline-enriched proteoglycan (leprecan) 1	1.2966	0.374734	0.00011795	0.00338192	24.1542	60.0113	47.7688	39.7479	44.7646	36.9177	16.2054	10.3849	36.1329	16.937	22.1607	16.4332	32.7443	21.0771	21.4922	4.3438	4.35802	3.17499	19.7194	19.2525	22.2664	17.1182	11.8279	13.983	33.9739	34.5578	32.3117	20.9317	23.9567	22.0377	28.1937	25.4673	19.6021	38.9062	24.9259	19.5898	17.8396	10.8537	13.421	21.2588	13.8863
3q26.31	NM_014932	22871	NLGN1	neuroligin 1	0.683727	-0.548507	0.000117789	0.00338192	0.936291	1.86541	1.05552	0.867589	1.76221	2.71345	1.88416	3.32679	0.691341	4.30126	3.64121	2.888	2.46769	4.71746	3.83817	5.31528	6.03423	5.00763	2.06235	2.15026	1.7097	3.0014	2.52061	4.03237	3.09681	2.90476	3.0555	1.85132	1.61782	2.48836	2.06795	2.91046	2.15329	3.17562	3.83441	4.51199	2.01124	1.86643	2.28158	1.66006	1.7659
11p11.2	NM_016223	29763	PACSIN3	protein kinase C and casein kinase substrate in neurons 3	1.72693	0.788206	0.000118919	0.00339022	6.12917	15.0837	18.8413	16.8219	13.7131	8.35117	5.45079	2.38881	17.9217	6.0517	7.18174	5.17152	3.49052	4.83234	4.60147	0.598403	0.50747	0.622453	9.61758	7.2289	9.99625	3.79729	2.71696	2.67901	8.46912	8.74941	8.8739	7.30379	5.64325	3.70717	8.67017	7.44441	6.12201	9.88917	5.37315	3.67447	1.95949	2.13609	3.29462	5.77068	4.53994
1q32.1	NM_003281	7135	TNNI1	troponin I type 1 (skeletal, slow)	2.03371	1.02411	0.000118809	0.00339022	2.98477	4.37057	4.70808	5.05953	6.93361	3.83694	19.1456	9.61504	2.53159	4.93415	4.11184	2.00301	4.58483	2.00679	4.74139	0.636346	0.463286	0.320527	1.6269	1.27186	1.78188	3.69905	1.81942	0.65708	7.13425	4.50069	5.725	2.23835	3.05982	2.60423	6.41789	3.21768	2.71828	4.74065	4.11547	2.20837	1.06353	0.724501	0.593374	1.94173	1.877
4q35.1	NM_001151	291	SLC25A4	solute carrier family 25 (mitochondrial carrier; adenine nucleotide translocator), member 4	0.789454	-0.341073	0.000119784	0.00340515	8.84444	7.01327	5.36853	4.3238	6.96708	7.9179	10.0099	12.8744	5.11077	11.2776	12.398	12.8483	6.93961	8.10559	6.48569	18.2051	17.99	16.9218	8.20064	7.35437	8.28095	9.38356	11.2414	9.43383	8.0398	8.38086	9.31132	13.6839	11.5682	9.40156	8.8054	10.0621	8.15498	8.14582	9.50808	7.07141	14.7288	15.464	14.9489	11.3342	11.9042
Xq22.1	NM_000169	2717	GLA	galactosidase, alpha	1.27488	0.350363	0.000120634	0.00340988	5.45647	6.11884	10.9323	10.6884	9.27308	7.9478	8.82619	15.625	16.304	7.73953	8.98962	7.12249	8.33054	8.53632	8.34517	7.41543	6.64832	6.80181	5.38298	6.69911	5.6481	5.0179	6.61512	4.75186	6.25358	6.01025	6.68376	3.13022	3.80062	5.4293	6.89337	6.60779	5.92393	9.625	7.5865	6.82194	7.37417	5.38671	6.22688	4.84176	4.39364
11q24.2	NM_152713	3703	STT3A	STT3A, subunit of the oligosaccharyltransferase complex (catalytic)	1.14046	0.189619	0.000120439	0.00340988	9.66676	38.708	31.7572	26.4224	39.0258	42.7129	20.8068	30.9092	45.919	20.4433	22.6822	15.2746	42.0519	28.1884	40.3177	17.2715	16.8665	15.021	21.409	23.5599	24.0979	13.1098	10.9973	15.9301	32.3248	29.9269	29.437	7.37526	7.9177	19.8225	23.4583	22.3363	20.171	35.8202	24.4363	28.1868	19.6983	16.1395	20.6118	11.6774	12.9543
12q24.13	NM_001109662	283450	HECTD4	HECT domain containing E3 ubiquitin protein ligase 4	0.742863	-0.428832	0.000121337	0.00342006	6.1281	6.98561	3.5466	2.24731	3.43632	4.98504	6.11806	3.57808	4.55622	4.72593	6.06248	5.48039	5.76036	4.77959	4.53762	8.81853	9.51223	9.52072	7.49368	7.05701	5.93373	10.9892	7.0521	7.90307	4.77055	5.395	5.86405	7.20906	6.33571	8.49444	6.32019	8.07164	8.30479	6.70278	7.53803	5.48147	7.28592	11.4634	7.61592	4.53944	4.66616
8p21.1	NM_001440	2137	EXTL3	exostosin-like glycosyltransferase 3	0.819614	-0.286984	0.000123628	0.00346506	17.4288	11.4003	9.86913	7.52003	8.75574	9.67093	14.4176	5.97026	8.48266	11.1062	12.8694	12.3988	9.90571	12.5169	8.13175	20.0495	19.8304	20.5796	12.3678	10.0684	11.8094	15.9598	14.7108	12.9697	9.22953	10.7179	11.2587	18.3957	15.5702	13.8923	12.9756	14.8148	13.491	12.9969	13.3177	10.6213	14.752	16.6456	15.008	8.65973	9.61215
17q21.33	NM_001018136	654364	NME1-NME2	NME1-NME2 readthrough	0.523716	-0.933143	0.000123306	0.00346506	2.86564	5.1924	5.66587	4.2656	3.27157	4.54649	6.6676	0.301654	0.871244	14.5574	11.1325	11.8088	7.3801	3.25565	5.53715	9.13874	11.3388	10.0773	6.5632	6.91823	10.1801	9.84211	15.104	9.56857	4.6307	5.06572	6.42751	6.11594	10.2159	9.33094	5.1157	13.8831	9.56366	3.85291	8.88151	6.91872	10.4276	11.4487	8.95295	7.44289	10.4935
1q25.1	NM_004905	9588	PRDX6	peroxiredoxin 6	1.12277	0.167057	0.000124546	0.00348098	70.2261	78.0202	179.256	167.975	133.044	111.217	60.9975	89.4544	158.583	78.0681	84.0774	64.3165	74.2016	76.5418	85.2162	24.3232	21.8578	20.7774	75.9259	68.6993	83.432	43.726	56.6113	40.4136	87.0513	87.0004	81.8232	72.632	67.1186	74.2369	91.4525	77.5286	73.9583	93.7917	72.4413	68.8303	60.8333	51.137	56.8665	72.3073	61.6678
15q25.2	NM_032856	84942	WDR73	WD repeat domain 73	0.89394	-0.161751	0.000124894	0.00348098	8.45301	7.20809	9.87862	9.05157	6.87018	6.88538	7.79712	6.67437	11.3921	12.3687	11.3606	9.74053	9.54806	12.1273	10.5096	9.7677	9.57451	9.8233	8.19335	7.69781	8.35631	9.95182	10.3066	8.36555	10.0552	10.7906	9.61859	12.0189	11.2917	9.30662	8.88343	9.49738	8.44316	12.1508	10.6885	7.80342	9.15704	9.3122	8.91592	6.72767	6.7371
9q34.3	NM_015447	157922	CAMSAP1	calmodulin regulated spectrin-associated protein 1	0.811726	-0.300936	0.000126316	0.00350106	11.239	9.60972	10.4101	9.2944	9.42646	11.3219	14.6938	9.62043	8.39336	11.9188	17.2068	15.78	11.6762	18.0195	11.6993	27.2134	27.1313	28.0643	12.6308	12.1577	11.9504	15.1686	13.6433	14.0358	14.2271	11.6512	12.1486	8.25986	8.63359	13.2022	11.1203	13.3139	12.2163	11.8885	13.0975	12.526	13.5925	15.781	14.8653	10.1778	10.6747
11p11.2	NM_002391	4192	MDK	midkine (neurite growth-promoting factor 2)	1.13912	0.187919	0.000126078	0.00350106	271.795	336.417	811.914	764.735	445.758	315.832	195.11	121.276	541.116	214.506	195.117	116.173	301.635	139.964	163.257	46.3755	40.5453	47.9717	227.058	206.794	262.389	120.936	113.251	89.0354	320.271	463.276	465.241	199.278	239.316	88.4124	281.329	236.233	201.561	336.406	257.564	227.558	115.107	47.4201	87.7962	197.224	204.705
12q13.12	NM_016357	51474	LIMA1	LIM domain and actin binding 1	1.61966	0.69569	0.00012823	0.00354427	0.883493	4.23748	7.59032	3.3487	9.74216	9.27951	2.55522	4.04618	18.1906	3.87835	3.71959	3.30885	6.29612	4.37725	5.55307	1.7045	1.14847	1.83028	3.48314	3.15438	3.12364	2.67421	1.17301	3.30497	4.779	4.60367	4.52101	1.2545	1.14671	2.35405	3.68264	2.77825	3.77259	6.67176	4.35872	5.63091	1.83932	1.72219	1.51275	1.40315	1.02692
1q21.3	NM_014624	6277	S100A6	S100 calcium binding protein A6	1.29959	0.378061	0.000128999	0.00355568	89.6245	40.0745	70.5738	65.146	109.699	82.2929	75.8035	100.373	146.618	45.5069	44.4679	35.1304	60.0019	39.1436	49.3308	9.83988	10.3761	11.4731	41.5572	33.7905	41.4885	34.5244	39.7839	37.0125	48.878	55.0249	66.4258	46.1584	49.4829	16.4084	51.738	46.1303	54.7647	25.8612	30.7346	18.3468	30.3722	24.2576	30.4832	74.1579	77.8373
12q13	NM_021104	6171	RPL41	ribosomal protein L41	1.07576	0.10535	0.000131062	0.00360259	3700.44	5226.32	5458.2	5897.23	4597.23	3470.06	2401.58	4610.87	3206.23	4051.94	4040.07	3489.81	5020.6	3463.3	3429.19	1558.18	1391.9	1302.49	3685.94	3328.33	3514.8	2212.66	3031.78	2608.39	3840.84	4039.39	4018.77	2853.03	3127.15	1538.28	3779.87	3509.53	3336.41	3832.76	3760.88	2864.77	2520.52	1956.29	2357.93	3461.68	3256.23
17q21.1	NM_007359	22794	CASC3	cancer susceptibility candidate 3	0.828109	-0.272107	0.000131911	0.00361596	14.1807	15.6716	15.3402	8.29904	15.9334	16.8428	17.0318	10.5047	14.7606	18.4538	21.7673	22.1201	17.3869	23.9193	18.4604	26.51	28.4072	28.3114	23.1324	21.128	23.8703	23.0745	19.2372	20.3876	19.4217	19.4556	18.212	14.4844	14.57	18.5005	17.8963	20.771	18.6654	15.1148	13.661	14.8474	15.641	18.8078	15.9693	11.1653	10.9057
5q33.1	NM_003118	6678	SPARC	secreted protein, acidic, cysteine-rich (osteonectin)	1.12149	0.165422	0.000133863	0.00365942	308.902	628.991	1466.3	987.249	1107.82	936.168	216.253	213.524	1362.03	483.642	525.952	351.664	716.861	385.733	481.975	60.6676	56.7812	55.5955	492.166	417.693	547.163	301.411	304.2	309.406	830.53	873.107	687.637	232.089	289.569	378.239	755.696	611.662	505.988	920.399	583.73	507.282	378.755	197.559	271.712	327.09	205.201
14q22.1	NM_001099652	283554	GPR137C	G protein-coupled receptor 137C	0.575094	-0.79813	0.000134791	0.00367032	1.23985	1.59048	0.603425	0.694681	1.27761	2.60401	2.0305	4.66362	0.21707	1.60339	2.17636	1.59936	2.89201	3.7262	2.22908	7.44239	7.41903	6.64782	1.64833	1.86103	1.80927	4.77069	5.82171	7.04987	3.278	3.60569	3.53222	2.00737	1.68057	3.67909	2.65589	2.58236	2.68934	2.48235	3.58347	3.95548	3.05164	3.872	3.77117	3.31466	2.78024
17p13.2	NM_015253	23302	WSCD1	WSC domain containing 1	0.627524	-0.672258	0.000134998	0.00367032	12.878	7.89917	4.84559	5.94278	4.92668	7.02943	11.8235	6.10128	2.68871	6.66185	6.44464	7.7848	12.5376	16.7047	11.7676	14.1163	14.1419	16.7468	7.58517	6.92464	7.3805	10.5821	12.559	9.1625	13.4035	13.3009	14.6852	13.6142	11.6417	10.9641	16.1759	18.616	16.4138	12.6437	14.7852	12.9045	16.5567	18.4615	19.0905	14.6404	15.7875
8p22	NM_001008539	6542	SLC7A2	solute carrier family 7 (cationic amino acid transporter, y+ system), member 2	1.9463	0.960737	0.000135688	0.00367905	0.288711	6.00413	10.6423	10.2784	7.74203	7.43923	0.231971	0.462811	20.6578	2.66613	3.6845	2.83104	2.00102	1.50365	2.78023	0.066668	0.183869	0.058809	4.14769	3.50915	4.15167	1.21777	0.581845	1.74414	3.21267	2.715	2.3564	0.367368	0.830357	0.332451	4.48823	4.52376	4.20663	6.51044	3.75154	5.57667	0.88079	0.203917	0.872379	0.308731	0.000132
Xq22.1	NR_033669	54470	ARMCX6	armadillo repeat containing, X-linked 6	1.31503	0.395099	0.000136501	0.00368111	11.5763	11.2275	28.0743	23.4837	16.2468	13.5026	15.2011	31.5289	25.1587	10.4411	14.302	12.3368	9.49629	19.3122	12.4224	9.6128	10.4737	8.94445	10.8366	8.6655	12.6233	7.73482	14.7625	9.12681	13.4329	14.5322	14.5246	8.74891	11.1284	8.97799	10.6391	9.96063	9.02349	16.5621	14.4885	10.7739	8.29822	5.5427	7.22148	10.3819	6.4569
20q13.33	NM_001958	1917	EEF1A2	eukaryotic translation elongation factor 1 alpha 2	0.684658	-0.546544	0.000136228	0.00368111	82.8931	32.0364	10.7609	11.9123	23.854	26.0418	95.1001	34.2151	7.65887	81.8459	77.9168	101.853	21.0757	58.5346	26.1707	93.3173	87.7778	101.651	48.1306	36.7189	46.6181	55.6956	67.6614	56.5075	38.2838	41.9886	55.6534	53.1992	66.5046	27.5514	53.303	60.3584	58.973	39.8526	51.9865	46.5011	42.3929	48.4978	40.9741	49.2494	56.3417
1p13.2	NM_033020	51592	TRIM33	tripartite motif containing 33	0.723216	-0.467502	0.00013741	0.00369563	0.941538	2.317	2.01408	1.78179	2.50023	5.03083	2.90758	2.76731	3.17063	3.16963	3.36763	1.90621	4.5854	5.46529	5.63475	6.63439	6.02069	4.7593	3.77468	4.10389	3.17799	3.47486	3.6964	4.07705	3.93013	4.04072	3.96259	3.22968	2.6087	3.16285	2.55245	4.64912	3.21307	3.39935	4.70471	4.60374	3.9927	4.61149	5.53529	2.67143	2.40957
7q34	NM_053035	51650	MRPS33	mitochondrial ribosomal protein S33	1.16274	0.217525	0.000138273	0.00370883	6.20566	17.7601	25.7943	30.9763	19.0644	14.1211	12.2995	23.8863	17.1077	13.4074	14.5415	17.4887	17.1163	15.4187	21.596	9.87168	4.59419	7.5448	17.5235	15.8452	17.5254	7.91532	9.90632	9.05756	22.2349	17.8805	18.786	4.3269	4.93527	11.547	15.3617	13.5882	11.3866	15.4603	14.3596	19.2547	20.582	11.3537	14.8617	8.54891	4.63475
12q13.3	NM_004984	3798	KIF5A	kinesin family member 5A	0.559759	-0.837123	0.000140573	0.00376043	8.65806	4.92916	3.09587	1.18802	5.4082	8.58606	15.1921	8.76448	1.00399	7.99766	11.4159	13.1544	8.13057	12.4825	8.18725	34.5509	37.7941	40.6593	8.51738	7.77354	8.45377	20.525	14.4444	15.6357	10.7745	9.6806	10.1194	6.28868	6.49889	11.1658	9.47959	13.45	9.78653	8.68499	9.99076	10.3231	9.09685	13.9792	10.9941	5.25073	5.38812
11p14.2	NM_203371	387758	FIBIN	fin bud initiation factor homolog (zebrafish)	1.37496	0.459395	0.000142408	0.00378919	3.3971	77.6585	18.9627	15.5548	27.2435	22.2594	3.95032	5.52086	6.02773	12.3978	11.5181	9.67894	9.20955	8.29754	6.86466	3.60713	2.62792	2.59262	7.25726	7.12878	8.61471	9.89579	10.5772	11.793	29.8675	22.2371	16.6423	3.02255	3.24078	4.36874	14.4668	8.84543	7.78139	16.7312	11.9085	12.0827	8.72911	2.36078	4.10079	6.94116	3.87317
5q31.2	NM_001271803	51308	REEP2	receptor accessory protein 2	0.661196	-0.596851	0.000142203	0.00378919	26.0814	13.98	3.71303	7.50966	5.08874	7.50221	28.8452	14.6437	3.55386	13.5872	11.9308	12.2641	5.9752	12.0703	8.37622	29.1748	28.117	31.707	14.9361	13.6035	13.4781	20.512	22.845	13.1648	13.8055	13.599	20.4385	31.8933	31.3079	14.0343	14.8342	17.4404	16.2194	17.529	17.9798	15.2094	20.7026	22.5079	18.3156	17.6211	26.965
10q23.31	NR_125373	100132116	ACTA2-AS1	n/a	1.95367	0.966188	0.000144256	0.00382816	3.04998	6.26749	4.11057	3.33551	7.57255	7.02156	1.23988	1.37102	3.48213	2.78185	2.55775	1.85441	1.85293	3.18643	1.84301	0.851539	0.981305	0.652875	1.98083	2.0696	2.48239	1.84565	1.94719	2.05521	2.33464	2.14465	2.33429	1.53375	1.56922	1.91565	1.13714	1.47016	0.871342	3.65261	2.23824	1.59462	1.42899	0.899126	0.796603	1.76396	2.62515
8q13.1	NM_025054	80124	VCPIP1	valosin containing protein (p97)/p47 complex interacting protein 1	0.758095	-0.399549	0.00014509	0.00384008	1.38907	2.98526	1.66307	1.34973	1.98554	3.48606	1.87607	3.23116	4.82361	4.58521	4.47283	3.60649	3.48926	3.63069	4.41611	3.8259	4.34323	4.41663	3.59958	3.42157	3.19857	3.25969	3.15862	4.37033	3.74176	3.03063	3.35313	2.20303	1.66909	2.36932	3.28816	3.80009	3.75845	4.10553	3.82635	4.8583	3.68803	4.12779	3.84176	1.882	1.89592
22q11.23	NM_001084392	1652	DDT	D-dopachrome tautomerase	1.22073	0.28774	0.000148056	0.0039082	36.8376	46.9849	42.9997	48.9869	37.4919	27.075	53.108	37.8612	32.5365	19.2173	18.2779	15.5471	18.3291	28.9352	22.9594	20.9622	18.9046	19.3533	15.7056	14.1851	16.4128	16.7928	23.9251	15.0579	27.2307	31.4538	35.9605	36.9767	31.237	16.2762	28.3483	26.1899	27.021	31.9527	28.0041	20.8425	22.35	14.0294	17.0915	26.0905	28.5766
5q33.1	NM_005617	6208	RPS14	ribosomal protein S14	1.08679	0.120075	0.000149298	0.00393059	1828.4	2545.55	1600.67	2106.02	1782.05	1210.3	1329.87	1991.8	1156.95	1575.43	1569.77	1403.64	1059	1340.5	1327.16	799.472	718.788	711.586	1109.44	932.679	982.484	867.424	1228.83	909.223	1474.14	1653.11	1708.11	1071.76	1246.74	556.07	1435.35	1323.54	1350.59	1496.91	1434.44	1102.69	937.022	793.397	834.323	1194.84	1197.59
8q12.1	NM_001023	6224	RPS20	ribosomal protein S20	1.05691	0.0798562	0.000150396	0.00394909	630.011	1096.48	1038.16	1076.46	1071.55	763.864	459.759	959.89	824.084	626.362	691.308	601.309	590.73	621.134	637.992	316.002	280.621	254.192	608.647	564.464	631.374	436.337	620.297	498.245	747.508	666.144	674.606	465.885	487.391	404.329	807.365	728.029	697.473	661.518	628.026	696.399	509.344	371.727	482.09	616.948	486.155
3p22.3	NM_001207044	23122	CLASP2	cytoplasmic linker associated protein 2	0.610083	-0.712923	0.000154117	0.00402029	5.05632	6.00213	2.37328	2.30913	5.56238	9.65175	11.5611	20.101	1.69092	8.38956	8.62861	9.38498	9.11647	11.347	10.152	30.5826	29.8105	29.2189	10.0005	9.87538	9.57842	14.2631	14.3209	16.2799	9.46519	8.99946	10.3701	6.26356	5.94631	10.2231	8.54596	9.59225	8.56367	8.65789	11.6818	14.8273	8.11036	10.0278	9.54711	6.63583	6.58169
18q22.2	NM_152721	220164	DOK6	docking protein 6	0.764678	-0.387075	0.000153653	0.00402029	1.31466	2.07009	0.689398	0.550992	1.46059	2.37571	1.51751	1.87384	0.176696	2.21351	2.06107	1.61102	2.00563	1.90793	2.46849	5.03316	5.72116	5.28046	0.869175	1.45963	1.0882	1.96972	1.6023	2.28388	2.51959	2.03907	2.30424	1.94632	1.65248	3.50792	2.0664	2.25149	2.01287	2.50383	3.10847	3.12142	2.41285	2.63188	2.82177	1.07354	1.21784
3q13.33	NM_007085	11167	FSTL1	follistatin-like 1	1.17403	0.231471	0.000154317	0.00402029	77.5595	230.153	177.919	137.255	164.513	160.421	68.3784	103.314	261.958	51.5465	71.23	46.9008	85.5407	85.6783	103.613	19.49	16.5492	15.8609	74.3451	76.2705	84.6814	48.5119	44.4432	43.2173	138.34	123.274	108.345	85.7036	71.0163	184.019	97.0632	88.6719	73.7914	118.391	88.5569	83.635	97.8642	78.9393	98.0762	70.9662	69.2092
19q13.4	NM_001009	6193	RPS5	ribosomal protein S5	1.06697	0.0935259	0.000155314	0.00403573	1061.65	1535.23	908.627	1170.82	1015.1	766.328	1128.62	1391.82	660.621	908.851	1036.43	979.011	637.294	922.828	802.367	499.189	453.926	456.526	692.691	545.592	616.064	512.448	714.785	526.327	787.194	933.428	1009.33	701.22	807.315	362.733	805.368	771.919	795.941	941.578	957.929	723.088	585.745	465.38	508.987	769.441	802.842
2p21	NM_019063	27436	EML4	echinoderm microtubule associated protein like 4	1.34871	0.43158	0.000156489	0.0040557	1.67731	10.676	12.4802	8.17655	14.4311	14.7411	4.15224	1.73416	20.9443	6.32932	5.31518	3.75552	14.7203	6.23161	15.1889	0.881188	1.11399	1.56348	7.12066	8.36143	7.50744	4.28815	1.81575	4.23799	13.8147	11.0888	11.0269	1.51582	2.24953	5.55638	8.03867	6.0919	7.3584	12.2277	8.2926	9.51818	5.07028	3.79851	2.70298	2.86423	2.24155
10p15.3	NM_014974	22982	DIP2C	DIP2 disco-interacting protein 2 homolog C (Drosophila)	0.81907	-0.287942	0.000158856	0.00410638	4.90645	7.13629	4.5932	2.87686	5.36405	5.45493	5.16943	3.04378	5.07434	4.25505	6.10973	5.99899	5.55708	6.32679	4.72243	10.0806	10.3931	10.1255	6.31762	6.1366	6.48729	7.99855	6.33674	6.98614	6.43974	5.8807	6.18591	5.89783	5.98037	7.94785	6.07515	6.78272	6.53434	5.76618	6.01992	5.65768	7.15546	8.247	6.87583	3.87379	4.08272
19p13.3	NM_145173	148252	DIRAS1	DIRAS family, GTP-binding RAS-like 1	0.692805	-0.529478	0.000159604	0.00410744	5.49368	3.56569	2.43778	2.22121	3.2589	3.97072	7.39001	3.29124	1.49985	6.88248	8.51953	8.75763	3.33027	5.54322	2.89794	13.5573	13.3909	15.2166	4.75536	4.78351	4.34485	7.049	5.97227	5.07256	4.66264	5.07296	5.09321	5.02767	4.52157	4.73324	5.2097	7.31069	5.25853	4.81814	5.55807	5.58935	4.82266	6.07515	6.17464	3.37508	3.34284
20q13.13	NR_003604	441951	ZFAS1	ZNFX1 antisense RNA 1	1.13592	0.183864	0.00015972	0.00410744	19.9425	117.822	68.9588	88.0928	94.8462	68.49	35.9774	93.764	68.4085	50.8633	63.0444	57.5646	47.5675	63.256	50.4125	38.9559	32.1268	24.2234	41.8363	38.2511	41.4103	27.2917	44.9313	42.9695	66.6459	61.7503	57.2776	11.695	14.2881	23.5983	48.3955	53.2303	45.518	64.1672	53.6309	61.3754	28.7435	21.826	25.4988	32.5996	15.2146
13q12.2	NM_015972	51082	POLR1D	polymerase (RNA) I polypeptide D, 16kDa	1.08644	0.119613	0.000160593	0.00410872	46.2819	65.8388	62.7819	61.7989	69.3671	57.5833	40.0408	58.5385	62.4471	41.7969	39.4708	38.3265	48.2567	39.2434	37.4206	34.218	26.5671	26.4134	55.345	46.2903	65.6701	28.4665	38.2785	39.4413	55.6755	58.2604	56.8296	38.854	36.3571	19.1438	51.2735	48.6836	46.2762	50.7391	54.878	51.3965	35.7549	34.2285	36.7835	47.2608	39.4646
10p11.22	NR_024284	220930	ZEB1-AS1	ZEB1 antisense RNA 1	0.817918	-0.289971	0.000160249	0.00410872	1.60338	1.92842	1.87469	1.98001	1.84652	2.30052	2.05826	2.18668	1.72208	2.76723	2.39691	2.87554	3.18593	3.3403	3.41023	3.50336	4.00699	3.5689	2.3886	2.70519	2.44507	3.7243	3.90533	3.62755	2.59924	2.59362	2.1405	2.23805	2.22768	2.10203	3.29827	3.21498	2.91974	2.73789	2.22433	3.12966	3.34257	2.44799	2.62408	2.21282	2.40843
21q22.3	NM_001849	1292	COL6A2	collagen, type VI, alpha 2	1.20209	0.26554	0.000161571	0.00412316	152.324	228.73	430.543	328.821	282.762	193.535	104.221	25.7517	229.501	108.591	106.549	91.7723	41.0192	86.0687	68.4333	15.3398	10.9893	14.1002	137.297	123.123	168.708	90.6079	57.6917	69.9476	193.682	207.119	227.783	101.821	113.032	53.5408	177.868	144.701	148.131	196.656	153.953	110.613	66.6412	36.1992	41.02	91.0982	77.7446
14q11.2	NM_002937	6038	RNASE4	ribonuclease, RNase A family, 4	1.59762	0.675925	0.000162417	0.00413418	0.23207	3.24994	4.70438	3.36965	5.74302	3.77978	2.03416	5.56198	3.22248	2.02453	2.42906	2.25535	1.54252	2.8306	1.97773	1.56735	1.64379	1.10834	2.48723	3.07018	2.92788	2.21082	0.603331	2.11601	4.39511	2.03282	2.79605	0.405313	0.537516	1.14465	2.30558	3.20053	2.80732	1.24417	1.52298	2.84095	2.12592	1.4787	2.15008	1.83883	2.48391
15q25.2	NR_033738	440300	LOC440300	chondroitin sulfate proteoglycan 4 pseudogene	0.738676	-0.436986	0.00016284	0.00413439	2.55674	3.00781	1.23308	1.02183	1.3701	1.86663	2.91234	1.01442	1.18753	1.4297	1.6947	1.89828	1.56182	2.9921	2.46877	3.32623	3.95767	3.97439	2.40377	2.74356	2.26456	4.61894	2.29354	2.78958	2.44411	2.57959	3.09826	6.34777	5.73719	4.03323	3.02875	3.38486	3.84508	2.17842	2.20777	2.18377	2.49696	3.68233	2.35565	2.37917	2.92207
10q26.11	NM_001005339	6001	RGS10	regulator of G-protein signaling 10	1.85374	0.890436	0.000163397	0.004138	5.4276	3.53371	15.1984	18.0915	10.2934	7.66021	3.57206	6.19863	10.0458	5.72917	6.18902	2.46538	9.54737	4.49672	5.03654	0.467713	0.710766	0.000129	5.67871	4.82644	6.57081	2.24087	2.33348	3.1474	5.70882	3.87316	5.4769	2.90902	3.48783	3.75244	6.60969	7.12317	6.30634	8.99039	4.44566	7.26106	1.31575	1.13274	1.27919	3.54846	1.85078
1p31.1	NM_024686	79739	TTLL7	tubulin tyrosine ligase-like family, member 7	0.666714	-0.584859	0.000164901	0.00416551	1.40548	2.94691	1.07912	1.70872	2.14024	3.36122	3.25502	6.04602	1.70858	3.61779	3.31661	2.54609	5.04282	4.5397	5.65021	8.8363	7.41293	7.07706	3.68195	3.72171	3.43805	3.65393	2.799	4.4569	5.30102	3.77039	5.05032	2.22076	2.05849	3.50771	3.90871	3.81246	4.03159	4.43471	5.13997	5.75008	6.68694	5.6091	8.09989	2.23828	2.25205
22q11.21	NM_001196	637	BID	BH3 interacting domain death agonist	1.80604	0.852831	0.000167761	0.00420323	3.44408	2.7209	7.34036	7.37614	4.06657	4.49936	3.32906	2.225	7.49717	0.832795	4.58231	4.22194	4.10896	3.02085	4.63469	3.01269	1.97815	1.08148	2.93273	1.96399	2.56001	2.56893	1.41249	1.32004	3.76996	3.87669	4.9656	0.738042	0.538211	0.588395	1.69497	2.89738	3.96426	4.22997	3.24018	2.36926	1.34509	0.584438	2.29101	1.83339	1.49811
1q22	NM_004632	7818	DAP3	death associated protein 3	1.22883	0.297289	0.000167854	0.00420323	5.80622	13.8534	12.471	9.99324	16.5552	14.2305	15.344	16.3923	18.9727	15.1202	11.0414	10.5579	11.7123	12.2736	11.1818	12.3663	7.39027	8.31917	9.10217	7.76196	6.0878	4.83357	7.18803	7.92274	11.3135	9.56662	10.1325	4.76567	3.91638	8.09373	11.3524	10.2355	7.4574	14.2008	11.4854	14.8086	6.98336	8.12679	6.73128	5.74539	7.83513
17q11.2	NM_203318	399687	MYO18A	myosin XVIIIA	0.622913	-0.682896	0.000167893	0.00420323	6.05515	1.22463	2.13949	2.04625	2.59192	3.88143	7.557	2.69642	3.01314	3.50167	5.49725	5.82378	1.32513	7.04241	3.85334	9.47348	10.145	11.1499	7.69098	5.59373	6.3129	8.27888	5.27678	6.00048	4.32417	3.44879	5.75484	6.08986	6.45417	5.17689	6.01886	7.65192	7.31427	6.13005	5.40313	4.47023	5.39899	7.32423	5.58024	3.72065	4.70951
13q12.2	NM_000982	6144	RPL21	ribosomal protein L21	1.10553	0.144732	0.000168393	0.00420323	273.554	1062.6	671.905	685.307	542.133	253.625	575.267	1096.66	398.204	236.597	645.253	613.517	222.138	709.26	388.134	76.9761	256.019	86.7478	282.995	245.277	341.458	130.424	568.126	292.169	275.792	368.189	289.176	146.911	159.072	240.707	304.751	212.667	298.307	483.058	284.467	246.602	261.95	197.99	189.433	524.758	222.468
6q23.2	NM_001016	6206	RPS12	ribosomal protein S12	1.10016	0.13772	0.0001685	0.00420323	1362.02	2418.74	1445.26	2125.55	1686.08	1293.24	1027.8	1845.81	1684.02	1343.74	1225.68	1098.42	919.4	1369.14	1501.66	767.9	708.594	635.975	964.661	905.444	1004.57	879.661	1208.47	917.229	1488.39	1512.28	1501.69	888.936	1071.45	783.582	1486.65	1410.21	1275.35	1556.18	1321.36	1328.29	864.108	647.341	749.45	1086.29	879.407
7p15.3	NM_001031710	55975	KLHL7	kelch-like family member 7	0.688655	-0.538147	0.00016962	0.00421961	3.02304	6.16516	4.63826	3.84251	6.14817	6.65569	8.39828	18.5153	7.23761	8.99587	7.95826	8.65669	11.0357	10.9099	9.96912	21.6534	18.1829	20.3556	7.94155	9.65178	8.59719	8.43482	7.47743	10.2219	11.3021	9.07349	12.6788	4.52504	5.78415	5.67878	12.247	12.3523	11.0349	11.45	13.2807	14.0981	12.4365	13.3387	17.4075	7.76326	9.23142
Xp11.23	NM_004182	8409	UXT	ubiquitously-expressed, prefoldin-like chaperone	1.05991	0.0839436	0.000170002	0.00421961	53.6903	59.5539	76.0061	71.9149	68.164	60.0903	49.517	83.219	63.8763	66.7573	56.9032	61.0698	49.3402	60.2903	47.6747	31.8437	30.0337	27.5956	51.2719	46.0828	49.5428	38.2215	42.4424	35.9011	51.975	55.3213	58.1071	47.5907	54.1666	31.2469	49.993	55.1769	51.0095	56.2668	51.5437	49.9409	40.5364	39.1899	41.765	46.0412	48.7169
17q22	NM_012329	23531	MMD	monocyte to macrophage differentiation-associated	0.744716	-0.425238	0.000170796	0.00422879	9.89183	6.57584	8.15902	8.83172	8.17887	10.4716	9.81004	16.5481	4.91156	16.2373	18.1368	22.6544	12.2653	16.3906	9.95844	25.8195	25.2604	26.1313	10.3465	10.9888	11.1842	11.9788	17.8038	14.8288	8.66835	8.87617	9.73291	8.93829	7.16663	11.5085	11.6521	14.076	13.7577	10.7313	15.3009	16.5451	13.2069	13.3928	12.9886	14.9031	11.0159
8q22.3	NM_001270377	157567	ANKRD46	ankyrin repeat domain 46	0.743748	-0.427115	0.000171489	0.00423067	6.02591	8.52521	8.43861	9.38169	8.46686	10.8568	10.3055	26.8764	7.23716	20.618	20.6509	22.8148	11.2807	17.5907	12.2686	34.2996	33.9421	27.5631	10.5765	11.3672	12.8005	12.715	22.0342	19.0828	13.1782	11.2218	11.7996	8.48632	6.44192	14.6666	12.1091	15.2871	11.4618	13.4663	14.9155	16.9922	17.3192	15.7179	16.8392	12.8781	10.2835
12p12.3	NM_175054	121504	HIST4H4	histone cluster 4, H4	1.14973	0.201296	0.000172568	0.00423067	144.901	167.822	141.682	165.236	141.652	108.654	91.0842	64.6773	77.4049	60.9788	73.8329	55.5751	112.253	103.979	94.6565	30.7298	23.7214	27.3143	80.438	74.3775	76.7981	51.5874	51.3196	44.8328	140.882	164.395	157.737	75.6618	68.6843	46.6954	78.4681	66.4523	81.1691	110.893	84.4899	66.0497	40.724	29.4131	28.5843	47.4121	51.1979
11p14.2	NM_178498	159963	SLC5A12	solute carrier family 5 (sodium/monocarboxylate cotransporter), member 12	1.98359	0.988113	0.000172473	0.00423067	0.206886	0.025931	10.2797	9.55852	4.07036	3.91264	0.383865	0.165638	13.8531	3.08874	1.95007	1.55057	0.285841	0.168906	0.61938	0.035503	0.064937	0.048422	1.82412	1.71853	1.65511	0.694127	0.673798	1.16525	1.33597	1.4188	1.15385	0.07542	0.196455	0.59175	4.46525	2.95818	3.1037	3.08046	1.93942	2.79957	0.287332	0.086758	0.235308	0.323361	0.357788
13q14.13	NR_024458	100190939	TPT1-AS1	TPT1 antisense RNA 1	1.22184	0.289059	0.000172032	0.00423067	7.07598	6.18417	7.00028	5.17847	7.37052	6.40062	6.38272	4.39841	5.75017	4.32002	4.9442	4.74403	5.05322	5.83388	4.09509	2.96903	2.93207	2.86199	3.79356	4.82314	4.27015	5.25732	5.41103	5.25631	5.85216	5.66184	5.94679	3.93985	4.55853	3.97378	4.68736	5.53802	5.54699	4.23777	5.678	5.77292	3.83912	4.28194	4.48894	4.43589	4.07195
12q21.1	NM_018279	55266	TMEM19	transmembrane protein 19	0.840165	-0.251255	0.000175066	0.0042814	1.76196	3.52725	2.76716	2.99993	3.14924	3.96454	2.4061	4.04126	3.18852	3.45915	4.42852	3.6875	4.3148	4.55082	3.60957	5.96903	5.72671	5.45815	4.06887	5.14964	4.8054	3.28697	3.89234	3.82364	3.84744	3.54811	3.69295	2.42901	2.35611	5.41372	3.78856	3.92521	3.42278	4.27611	4.43625	3.8745	4.34812	3.03251	4.37353	3.435	2.65915
10q22.1	NM_018649	55506	H2AFY2	H2A histone family, member Y2	0.868715	-0.203045	0.000177264	0.00431518	30.1795	24.0028	29.7264	21.9222	25.4257	27.072	26.3257	22.4023	16.636	27.0784	29.5067	28.5488	31.1281	42.7394	24.494	34.9382	32.3567	35.0479	33.9013	28.7504	31.2648	28.4885	33.6458	24.5421	28.1163	32.5764	37.1424	26.4635	29.7954	19.5242	31.2702	32.5603	28.5022	29.2487	29.4372	27.2223	28.3232	29.1637	26.2766	25.4549	26.6763
1p36.33	NM_022834	64856	VWA1	von Willebrand factor A domain containing 1	1.80116	0.848928	0.000177745	0.00431518	7.37879	9.11697	6.64703	6.75594	5.3409	4.03404	5.86557	4.1855	11.1698	2.4229	2.94353	2.65305	3.73235	3.83094	3.42692	2.53937	2.00416	2.69961	4.31208	3.65464	4.02281	2.44662	2.2395	1.41284	3.922	5.4286	5.21462	4.86377	4.71018	2.10382	3.93644	3.4397	3.50338	4.77465	3.74907	3.13826	2.11957	1.77444	1.76164	3.09458	3.6767
14q32.2	NM_173701	7453	WARS	tryptophanyl-tRNA synthetase	1.21384	0.279573	0.000177485	0.00431518	10.149	21.9851	22.9782	15.3763	17.3313	19.9875	13.3805	14.1469	33.1023	12.1319	12.5278	10.4744	17.0683	25.3259	14.6417	12.3386	12.9121	11.1826	12.9424	10.3922	14.514	8.03849	11.5032	8.46689	14.71	16.5598	13.4374	5.94181	6.64945	13.0054	14.0044	13.2149	8.7648	27.8687	17.1628	13.5796	11.0162	9.36023	11.4523	8.05396	5.78939
21q22.3	NM_015151	23181	DIP2A	DIP2 disco-interacting protein 2 homolog A (Drosophila)	0.826987	-0.274063	0.000179559	0.00434865	2.57164	3.32237	3.44711	2.14317	2.52254	3.24386	2.18715	1.47336	3.6125	2.67178	3.42438	3.10701	3.16	4.17534	3.94274	3.80317	4.57998	4.71924	3.69385	3.57698	3.09588	5.65445	3.59545	4.46486	3.91911	3.10483	3.4169	2.72746	3.21712	4.53846	3.78784	3.53791	3.63594	3.90751	2.99895	3.06177	4.10679	4.21965	3.96528	2.18656	2.37268
2q35	NM_013335	29926	GMPPA	GDP-mannose pyrophosphorylase A	1.41023	0.495935	0.000181702	0.00438988	9.46093	11.9707	18.5059	18.2301	21.0333	12.3338	8.80642	7.3815	20.2607	9.16905	8.28049	5.33482	10.1615	8.64104	10.6344	3.96242	2.78762	3.33205	8.12211	6.52443	7.98318	5.34873	5.48975	5.81175	12.7878	11.6902	14.7968	11.6432	11.7416	7.34393	9.88162	9.71283	7.31814	14.075	10.5742	8.10672	5.82871	5.16047	4.99223	10.4269	10.9409
1q32.1	NM_006893	1939	EIF2D	eukaryotic translation initiation factor 2D	1.18027	0.239112	0.000182851	0.00440698	19.5168	24.9988	24.0371	25.1488	22.5785	18.3334	13.6805	12.175	22.2107	13.8645	14.3145	12.7378	15.0007	15.9425	17.3161	6.04428	5.88249	4.70252	16.6804	13.256	17.3564	9.84221	13.1384	10.1815	18.2167	21.5721	17.7357	17.2481	18.0456	12.8692	20.8392	20.6012	17.6883	20.8605	18.5143	12.5336	15.9311	12.0725	12.059	15.3223	11.7614
7p22.3	NM_017781	54905	CYP2W1	cytochrome P450, family 2, subfamily W, polypeptide 1	1.9734	0.980686	0.00018395	0.00442278	1.20866	2.28941	8.87041	7.85381	5.90477	3.87744	0.829936	0.471096	3.53978	1.37654	1.95333	1.53948	4.11806	0.799656	1.85305	0.080828	0.103613	0.092889	2.35157	2.04815	2.15274	0.702447	0.318895	0.793211	4.2207	5.21211	5.57023	0.887845	1.64094	0.362076	2.57754	2.03565	1.9128	2.37484	1.80238	1.59624	1.0042	0.271407	0.477132	0.695846	0.70733
10p14	NM_014142	11164	NUDT5	nudix (nucleoside diphosphate linked moiety X)-type motif 5	1.0968	0.1333	0.000187299	0.00449248	12.077	17.3508	31.9013	30.5623	21.8285	19.9218	14.5589	24.971	26.8075	17.0244	20.4624	13.6423	22.4457	17.1211	20.5647	9.31645	10.6288	9.98622	20.6557	19.4597	22.6451	9.87305	17.7193	13.3002	20.3055	16.4641	18.2314	7.54321	9.89652	17.8403	20.4902	19.4574	17.8543	19.9062	18.944	16.8999	19.3728	12.9868	20.3447	15.6072	12.8444
10q23.31	NM_001613	59	ACTA2	actin, alpha 2, smooth muscle, aorta	1.79032	0.840217	0.000188318	0.0044953	21.672	39.2527	28.4881	16.2041	49.0417	51.418	11.2748	8.06686	10.4179	13.4966	19.6945	10.3014	13.618	19.7335	10.9754	3.38984	3.4089	3.65603	10.06	8.39277	7.63251	12.1751	8.49826	7.60737	11.0871	10.3688	11.0771	6.4207	8.04644	8.37395	6.40547	4.27497	3.7238	21.6347	12.0624	7.37107	5.76178	2.3599	5.28527	11.1639	8.56411
6p22.1	NM_003546	8368	HIST1H4L	histone cluster 1, H4l	1.16	0.214127	0.000187896	0.0044953	345.502	211.944	247.106	325.974	125.279	133.846	145.498	164.425	66.8003	127.025	120.973	89.3538	267.614	229.317	191.557	15.3596	22.3736	14.2034	137.585	128.152	121.309	67.0279	96.6087	56.6672	104.27	129.055	127.568	52.6086	62.4335	55.4652	132.664	115.826	131.694	192.626	167.636	136.594	41.6766	30.1013	28.264	84.4097	78.5714
11p15.5	NM_022772	64787	EPS8L2	EPS8-like 2	1.93486	0.952233	0.000190525	0.00451562	2.8897	2.22878	12.0514	10.0217	5.84817	4.5239	3.35976	1.7688	18.1701	2.15358	1.9316	1.95804	1.46175	1.39976	1.85952	1.19101	1.03269	1.20417	3.68306	3.39411	3.94616	1.55464	1.08459	0.964179	3.61085	4.76584	5.24983	3.237	2.97499	1.5122	3.27206	2.81975	3.2793	4.10275	2.97117	2.55486	2.57387	1.96915	2.26596	2.16284	2.54573
9q31.3	NM_057159	1902	LPAR1	lysophosphatidic acid receptor 1	1.30472	0.383741	0.000190527	0.00451562	6.37513	13.3519	9.6193	7.94822	12.099	13.0119	3.77359	6.61923	5.8228	6.2801	6.38589	4.61639	11.6971	11.0907	8.75488	2.59681	2.27739	2.53784	7.59508	8.39767	7.4687	5.26544	4.52741	5.555	9.64784	7.89659	8.32419	3.86469	3.36242	5.76254	8.20348	6.23081	5.68109	11.7554	8.50364	8.12194	3.51292	2.50498	3.64005	4.53513	4.07545
19q13.43	NR_106865	102465976	MIR6807	microRNA mir-6807	2.11775	1.08253	0.000190375	0.00451562	0	0	0	0	117.052	130.332	0	0	0	0	0	0	0	0	0	0	0	0	0	0	0	0	0	0	0	0	0	0	0	0	0	0	0	0	0	0	0	0	0	0	0
18q21.1	NM_001035006	6139	RPL17	ribosomal protein L17	1.0757	0.105275	0.000191915	0.00453774	704.648	1283.53	1746.26	1587.5	1579.72	1133.03	618.692	1297.85	1047.54	902.724	994.974	918.374	1041.06	866.336	986.646	517.859	472.65	386.24	983.696	915.564	996.083	596.278	841.338	718.996	1056.06	921.488	899.485	454.293	556.115	491.255	1091.8	1034.51	871.121	873.982	820.107	971.957	662.511	515.861	636.882	736.725	640.797
1q22	NM_020387	57111	RAB25	RAB25, member RAS oncogene family	2.17377	1.1202	0.000193789	0.00457122	2.42331	1.71932	30.5459	27.3916	16.5238	13.5102	0.958952	0.972157	58.2367	4.30486	4.18898	3.09456	4.07687	2.34558	2.46745	0.234843	0.238079	0.159497	3.88623	4.41355	2.8759	2.06572	1.40887	1.0765	4.88746	6.40977	7.39292	1.34792	1.82312	2.02082	4.20642	2.53722	2.93838	9.7332	4.16819	4.82322	1.74283	0.40091	1.3977	1.82591	1.27814
9q34.11	NM_016307	51450	PRRX2	paired related homeobox 2	2.50794	1.3265	0.000194573	0.00457889	5.48653	16.9301	2.78169	4.49364	2.50881	2.4619	2.99458	4.20434	2.18408	1.02705	0.524034	1.05109	0.997933	1.83919	2.25817	0.113326	0.076633	0.128399	1.32321	1.01458	1.0561	1.05841	0.810589	0.611988	1.00482	1.07167	2.60402	4.96925	3.36507	1.17776	2.51638	1.48442	1.59435	2.4765	1.28222	1.63918	1.46234	0.322589	0.829741	2.06058	2.63305
1q22	NM_004428	1942	EFNA1	ephrin-A1	1.90259	0.927965	0.000196006	0.00459097	5.14211	4.49676	23.8041	22.2853	14.2819	7.78472	4.42044	4.95191	31.3989	4.77516	3.81648	4.63693	6.92031	5.62824	7.96069	1.01785	1.50243	1.36372	6.92299	5.3499	7.51627	3.1202	2.90885	3.25177	5.71694	7.16683	6.73966	3.88813	6.60227	2.63223	6.95747	5.22851	5.61335	8.51641	6.14093	4.78541	1.67335	1.27997	1.55077	3.61192	2.99668
12p12.1	NM_001001660	144363	LYRM5	LYR motif containing 5	0.72893	-0.456148	0.000195856	0.00459097	3.16113	7.01117	6.03261	4.3674	5.24962	7.08683	2.50256	5.64828	5.60668	9.68132	9.18333	8.67542	7.3974	9.66324	8.25424	9.22155	8.26589	6.50661	7.72774	6.85493	6.76029	7.36429	11.0765	7.9309	5.49701	6.07922	5.27329	8.14412	4.46875	8.13097	7.98	9.40777	7.51904	6.72117	7.9824	7.07952	11.5759	10.4311	9.63305	16.5662	8.6259
19q13.2	NM_000713	645	BLVRB	biliverdin reductase B (flavin reductase (NADPH))	1.15567	0.20873	0.000197693	0.00461382	56.6687	45.1302	65.0069	67.8005	55.4348	41.5265	53.9123	50.9205	102.335	40.7772	35.3647	32.6684	44.5964	34.6823	36.0015	18.5698	16.9087	19.0787	40.9441	34.9714	46.2618	21.376	26.4573	23.8849	45.8278	54.4233	59.0634	43.0821	43.7801	18.8083	59.125	58.5468	51.0942	67.3854	57.235	39.2191	30.8544	25.4446	28.4136	44.4573	47.3635
10q25.3	NM_139169	142940	TRUB1	TruB pseudouridine (psi) synthase family member 1	0.82562	-0.27645	0.000197907	0.00461382	3.63951	5.66591	5.80015	5.75032	6.3711	7.77163	4.62029	10.1761	7.98731	9.50777	9.70619	7.52992	8.49075	11.0915	8.90803	10.8763	10.4258	10.2066	7.47389	8.82375	9.76925	7.00084	8.48964	8.15332	9.55812	7.92715	8.8444	5.55104	3.54975	8.89107	7.09995	7.39369	6.49636	8.41575	10.2685	9.17524	8.98289	7.17096	8.8759	6.42893	5.84512
2p11.2	NM_016494	51255	RNF181	ring finger protein 181	1.0974	0.134084	0.000198988	0.00462822	73.5913	60.8823	90.3137	80.0917	73.8286	54.5973	69.2569	108.869	62.177	53.1486	50.5877	50.1217	48.6202	76.5254	64.3717	35.2009	34.6685	31.7567	43.8138	35.2514	44.1196	43.5637	52.4181	38.8736	59.3438	63.2275	63.3639	65.4262	55.7055	30.5747	58.0017	51.2614	52.7499	63.6643	54.5125	44.1605	38.3453	40.1352	39.4277	49.9641	53.57
3q12.2	NM_020202	56954	NIT2	nitrilase family, member 2	1.43772	0.523782	0.000200406	0.00465035	3.90892	4.43183	14.257	16.4107	8.58904	8.3727	5.79356	13.0454	18.4055	7.56781	10.1795	5.55022	4.76781	7.35101	7.57778	5.66555	5.54812	4.95754	4.66546	4.92395	4.68147	4.58687	3.18535	3.32264	7.89025	5.64811	5.84441	2.65818	2.40432	6.38048	5.65412	7.48484	3.35493	8.87537	7.13477	5.08526	5.68601	3.76544	4.10628	4.68747	2.78179
15q21.2	NM_014548	29767	TMOD2	tropomodulin 2 (neuronal)	0.600738	-0.735193	0.00020491	0.00474383	2.79368	3.05387	1.81908	1.18534	3.01367	4.70468	5.17269	6.90816	1.3521	10.7715	10.9798	10.4464	4.37149	6.10375	5.47629	21.2287	23.5302	22.8694	5.53812	5.75126	4.60325	6.49771	4.75543	8.0959	6.20176	4.66051	6.03768	2.50158	2.14524	3.91243	4.4639	6.02067	4.74263	3.8299	4.69313	5.32498	4.11944	5.4588	5.33483	3.22328	3.0316
3q13.32	NM_003778	8702	B4GALT4	UDP-Gal:betaGlcNAc beta 1,4- galactosyltransferase, polypeptide 4	1.40011	0.485538	0.000205767	0.00475266	1.78464	4.9747	11.695	9.52465	9.11509	9.11522	4.66462	3.53969	14.3613	3.05102	3.41608	2.18819	6.02662	3.16468	4.43258	3.85847	3.68824	3.69819	6.58331	7.79758	8.32272	3.41891	2.62697	4.4137	7.20233	5.72782	5.72551	1.72435	1.57269	4.39076	7.09076	5.25231	4.71058	8.04747	5.87019	8.72462	4.59307	2.25396	4.59498	2.05778	1.69676
15q13.1	NR_036443	440248	HERC2P9	hect domain and RLD 2 pseudogene 9	0.677639	-0.561412	0.000207804	0.00478861	0.663535	2.64127	1.57769	0.968104	1.86051	2.73619	2.15094	1.07585	2.81501	2.26505	2.84387	2.18685	4.34339	3.45116	3.10217	4.19446	5.68506	4.97069	4.58445	4.67979	3.94811	3.88731	1.53304	2.80612	2.88528	2.34449	2.49149	2.01756	1.6019	2.95886	3.2349	3.30919	3.53433	3.10263	2.46693	3.16394	4.15486	5.18594	4.56448	1.3574	1.19526
4q27	NM_001154	308	ANXA5	annexin A5	1.08096	0.112314	0.00021153	0.00481882	27.0138	107.348	126.041	104.349	157.537	153.148	45.3923	76.7084	212.504	65.8724	66.3976	40.0394	129.209	78.8852	94.6714	25.5573	22.5402	20.3332	99.8651	105.294	115.89	43.1859	44.3769	58.9433	124.656	103.644	107.589	30.9237	29.7144	69.6201	88.6	81.5112	74.3244	124.307	87.2268	96.2275	97.3326	59.2182	94.896	40.8005	37.0614
11q21	NM_144664	143684	FAM76B	family with sequence similarity 76, member B	0.818975	-0.288109	0.000210273	0.00481882	1.05299	1.96021	1.98614	1.68077	2.17328	2.17833	1.90871	3.0771	2.15398	3.40657	3.02388	2.92801	3.49023	3.5889	3.43738	5.115	4.19878	4.25446	2.07624	2.93994	2.84364	3.33137	3.10037	4.02348	2.8377	2.80571	2.77579	1.80086	1.52268	2.10621	2.25737	2.58149	2.52818	2.30159	2.65226	3.39206	2.29067	2.30131	2.16032	1.59401	1.56733
1p13.2	NM_198268	204851	HIPK1	homeodomain interacting protein kinase 1	0.729436	-0.455147	0.000210031	0.00481882	3.59749	11.513	6.07046	4.31005	5.92231	8.92162	4.66051	5.24235	10.6667	7.39479	8.69511	6.71521	10.1259	10.6273	14.2767	9.02416	9.20179	9.30787	11.8591	10.945	11.088	8.97277	5.11552	9.7446	12.0187	11.2604	11.1001	6.92564	5.95335	14.4737	10.2725	12.5366	11.6336	12.3402	11.8232	12.6671	14.9507	15.7981	14.0496	6.91217	7.28792
1p31.1	NM_030965	81849	ST6GALNAC5	ST6 (alpha-N-acetyl-neuraminyl-2,3-beta-galactosyl-1, 3)-N-acetylgalactosaminide alpha-2,6-sialyltransferase 5	0.649767	-0.622006	0.000211405	0.00481882	2.54412	3.68113	2.91135	2.71913	3.32809	3.06051	2.4943	3.17788	1.0626	3.23171	5.03371	4.0698	5.2712	7.7839	5.93243	6.73669	6.15749	6.06801	3.28389	2.89535	3.1752	4.7031	6.93816	5.4814	6.93342	5.22127	5.32825	3.64652	2.51797	5.33341	4.86796	6.11434	4.01154	3.32082	3.71475	4.2897	8.12116	5.79391	8.63191	5.50392	3.90797
6p25.2	NM_020135	56897	WRNIP1	Werner helicase interacting protein 1	0.887332	-0.172454	0.000211219	0.00481882	14.9816	13.4621	12.8674	10.2246	13.8122	13.1407	11.5545	10.4899	12.8137	14.5577	15.1331	14.6817	13.1831	11.74	9.74272	16.3002	16.159	17.4056	16.8689	15.6766	17.4288	12.3106	13.9611	12.1302	13.0613	13.136	13.0254	19.1199	17.8381	14.1328	14.4466	15.552	13.3313	15.563	14.3362	11.6862	17.5734	18.4866	18.1211	12.8109	12.919
18p11.31	NM_001010000	79822	ARHGAP28	Rho GTPase activating protein 28	1.30006	0.378583	0.000213764	0.00484758	3.18146	7.84079	11.2229	8.43025	11.6437	12.2342	2.79913	4.69788	11.9522	5.27642	5.04818	3.03423	11.0667	9.857	14.0438	1.46617	1.39972	1.60215	6.01541	6.75715	6.79212	5.24231	3.93746	5.28734	13.2732	9.64741	10.7556	2.20004	2.35961	5.93394	8.19612	6.95969	7.04229	14.754	9.20572	11.5574	3.648	2.21458	3.64788	3.71838	2.33658
19p13.2	NM_024029	78992	YIPF2	Yip1 domain family, member 2	1.18032	0.239181	0.000213571	0.00484758	34.7479	36.2863	40.1159	35.9406	27.4034	22.3956	36.6266	23.9943	44.7034	25.7216	24.9414	25.2116	16.4088	25.4817	26.0828	13.406	11.7161	12.7415	21.6104	18.4825	24.881	14.0737	16.0623	14.1758	25.6343	31.0394	31.972	26.9596	25.7854	13.9606	28.3973	28.9929	29.053	28.273	26.4135	21.9657	19.1133	16.0802	16.9702	26.8609	27.8472
15q21.2	NM_001142495	4644	MYO5A	myosin VA (heavy chain 12, myoxin)	0.630954	-0.664393	0.000214818	0.00486043	2.31395	2.50947	1.34662	0.935394	3.02739	4.2878	5.81699	4.64992	2.20281	5.14976	7.06053	5.0233	3.58481	5.28289	4.19226	14.8912	17.9516	18.1469	3.55183	3.3924	2.82513	7.71523	6.35916	6.43476	4.50596	4.21024	4.80713	3.40158	2.3469	4.33495	3.21727	5.20873	5.34257	4.80195	7.31519	5.73562	3.4608	5.74145	5.70528	2.1931	2.84511
7p14.3	NM_017946	55033	FKBP14	FK506 binding protein 14, 22 kDa	1.28846	0.365652	0.000216733	0.00487292	3.08812	15.3807	13.1211	11.3472	12.0131	12.4037	2.46647	4.57853	13.3449	7.00247	8.22325	5.20273	11.634	8.06275	9.05381	1.62382	1.66284	1.12375	7.16458	8.29722	8.81239	5.34487	3.34119	5.08208	12.2895	9.52738	9.07663	3.00144	3.14754	8.49908	10.1487	9.0675	7.08906	11.2148	7.62091	9.62366	5.23022	2.77233	4.46303	3.43681	2.72965
18p11.21	NM_001261443	2774	GNAL	guanine nucleotide binding protein (G protein), alpha activating activity polypeptide, olfactory type	0.748591	-0.41775	0.000216835	0.00487292	0.552256	1.85398	1.48576	0.70973	1.39852	1.61826	0.58085	2.34562	1.22314	2.11341	2.6136	1.73461	2.05847	2.77312	2.23871	6.45557	6.5153	3.4478	1.85318	2.0072	1.09504	3.26758	2.4127	2.53116	1.23245	1.6255	1.59276	1.67115	1.27907	2.54379	1.90548	2.53763	2.16657	1.72597	3.47217	2.45807	3.15231	2.44468	1.84364	0.828135	1.80508
8p21.1	NM_016240	51435	SCARA3	scavenger receptor class A, member 3	1.65973	0.730951	0.000215946	0.00487292	9.50026	16.5458	10.351	8.51309	7.92777	6.44424	4.16621	2.03594	7.04538	4.36524	5.21155	3.27006	6.06418	5.83821	4.35657	1.8892	1.75919	1.94084	3.96079	3.03318	3.81252	4.4137	3.715	2.3941	5.46335	6.867	6.77544	4.29892	4.88539	2.95693	4.87718	4.02962	4.01154	8.98251	5.95485	3.86282	2.81264	1.62174	1.61761	2.5175	2.3773
11p15.4	NM_001122630	1028	CDKN1C	cyclin-dependent kinase inhibitor 1C (p57, Kip2)	1.24448	0.315537	0.000218299	0.0048948	61.0261	60.9625	108.678	98.692	67.1817	47.707	27.9251	15.293	80.4627	38.3247	33.5612	25.1479	43.7668	26.4073	25.0213	7.51745	5.89914	7.9674	38.9902	34.7548	42.6735	16.2726	20.8133	15.7033	44.8517	45.1553	53.125	45.4485	36.4914	19.3925	62.7447	47.0681	54.9002	41.6304	41.2174	25.9279	30.8022	19.9955	21.4236	41.6215	35.2381
19p13.11	NM_001080421	23025	UNC13A	unc-13 homolog A (C. elegans)	0.674053	-0.569067	0.000219556	0.00491195	1.98265	1.67263	0.527342	0.386859	1.04551	1.64918	4.01753	1.91152	0.205056	2.62343	3.21253	3.56989	1.41115	2.7296	1.15623	9.46102	9.73791	11.7162	1.69037	1.31752	1.44657	4.54979	3.22703	3.70485	1.62747	2.25649	2.63174	2.15032	2.16838	1.78943	1.99366	3.11431	3.01513	1.70701	2.33351	2.26861	2.03193	3.27129	2.1168	1.62222	1.71394
16p13.11	NM_001277325	100288332	NPIPA5	nuclear pore complex interacting protein family, member A5	0.786966	-0.345626	0.000221398	0.00493106	5.412	7.63021	7.7613	4.28041	6.4452	6.84451	7.68814	4.90597	5.50504	9.36617	9.37705	9.58603	8.19737	7.52633	8.10549	9.36106	10.8299	11.6343	9.44195	9.71683	9.29328	11.4296	7.35046	9.93912	10.2801	8.8456	9.6327	7.49655	7.62058	8.60376	9.95266	12.793	12.974	9.9162	8.68853	11.417	8.23587	10.6785	8.06267	4.06012	5.65914
10q24.31	NR_002954	677800	SNORA12	small nucleolar RNA, H/ACA box 12	0.872932	-0.19606	0.000221054	0.00493106	246.805	57.5955	94.7476	193.925	401.161	331.528	320.895	171.73	142.789	440.079	300.413	266.734	485.922	500.62	281.451	325.105	305.232	350.429	392.812	372.409	396.983	264.454	169.522	252.191	377.489	334.739	249.15	314.28	302.52	273.65	266.766	207.823	286.674	163.167	236.847	312.919	303	234.431	234.502	324.812	303.813
1q21.3	NM_007185	11189	CELF3	CUGBP, Elav-like family member 3	0.626349	-0.674962	0.000223443	0.00495479	6.51891	2.8863	1.54976	2.47938	2.19368	2.53555	8.09762	4.49625	0.165497	7.15089	8.71323	10.7015	3.50162	4.54751	2.63464	9.50677	10.6381	11.7437	5.78122	4.16684	4.10815	7.34929	4.50196	5.5134	4.05983	3.62281	4.94093	7.38444	5.01411	3.12129	4.95483	5.63425	6.26695	3.60778	4.97142	2.70732	3.55707	6.30356	4.56745	4.63482	5.86257
9q34.2	NR_023344	100151684	RNU6ATAC	RNA, U6atac small nuclear (U12-dependent splicing)	0.91126	-0.134065	0.000223457	0.00495479	267.774	89.6057	126.847	569.175	209.161	171.595	437.981	364.199	228.73	360.019	513.273	695.031	416.004	499.533	277.498	241.799	338.517	282.659	230.381	230.116	154.8	341.551	356.315	336.834	269.299	273.376	182.912	391.249	453.422	388.416	199.65	242.907	191.281	158.877	320.61	235.726	359.322	463.258	426.225	330.72	564.312
12p13	NM_019858	27239	GPR162	G protein-coupled receptor 162	0.63585	-0.653242	0.000225611	0.00499146	18.4383	13.9522	3.7775	3.12749	3.78216	4.63933	15.3654	9.74765	2.4259	10.4004	8.94831	9.99707	4.92781	9.42243	7.21599	16.0574	16.2883	17.1136	9.71292	8.45162	8.43926	9.62422	10.3151	9.42993	12.362	14.071	17.3469	28.288	21.3697	13.7003	9.95576	11.637	11.4216	13.1915	14.6529	8.80404	20.9226	20.7555	20.2517	21.3289	23.1996
1p35.3	NR_024127	85028	SNHG12	small nucleolar RNA host gene 12 (non-protein coding)	1.46917	0.555004	0.000228086	0.00503505	2.42009	8.69262	5.32115	6.90477	5.60452	5.29865	5.53612	9.33435	10.2461	5.98232	3.7993	3.41345	3.97625	4.03918	4.51482	4.28979	4.49406	5.18159	3.22686	4.03648	3.70484	2.59907	2.56808	3.33434	5.11118	4.37512	3.03629	1.35969	2.06007	1.55979	4.144	4.24726	3.28145	4.80777	4.58988	5.16678	4.05351	3.84885	3.75195	2.44069	2.93762
6q14.1	NM_001199919	5238	PGM3	phosphoglucomutase 3	1.41685	0.50269	0.000228748	0.00503851	1.48309	6.06061	8.67704	7.37343	12.8638	11.0873	10.3308	17.4045	21.7922	10.3926	11.7274	5.53437	7.33316	11.1478	13.2717	3.92019	3.91422	4.10682	5.50043	3.47733	6.14209	5.34479	0.886037	3.57799	10.8769	10.8821	10.2644	0.933557	0.672379	1.87162	7.7871	6.96523	6.03071	12.7764	7.96457	10.594	4.97309	4.44107	5.39416	2.99484	2.91779
9q34.11	NM_001130438	6709	SPTAN1	spectrin, alpha, non-erythrocytic 1	0.71991	-0.474112	0.000231822	0.00509498	16.5879	15.572	8.25978	4.32758	11.2578	18.938	26.7368	13.6831	10.8099	24.5653	36.7134	37.5196	13.7391	19.3566	13.9293	52.8897	55.7547	63.5232	17.0982	13.5369	12.4158	36.6918	24.0418	26.4866	18.335	16.5721	18.4287	15.2647	17.0726	20.768	17.5045	25.4982	23.7895	17.7743	21.4739	14.9206	20.4497	29.9805	23.1337	12.8798	11.9673
9q22.33	NM_153698	195827	AAED1	AhpC/TSA antioxidant enzyme domain containing 1	1.53329	0.616633	0.000232336	0.00509505	1.90736	2.90899	5.99845	4.53862	4.44858	3.65832	2.60459	2.32113	5.75442	3.9472	4.22807	3.04462	3.12837	3.271	2.85392	1.18226	1.36437	0.692638	4.54278	4.21081	4.55879	1.90307	2.21507	2.3106	3.54984	3.19451	1.85594	1.54053	0.890981	1.57333	2.80908	2.70318	2.729	2.79646	2.04157	2.75036	1.95596	1.59127	2.36526	2.41264	1.60494
4p16.2	NM_001313	1400	CRMP1	collapsin response mediator protein 1	0.723465	-0.467005	0.000233376	0.0051021	66.9894	29.4221	23.3519	19.4927	34.2313	40.2618	76.9112	46.6686	7.93068	63.3522	72.3455	81.7135	46.0551	78.227	32.1619	155.027	158.005	162.398	48.7814	38.4686	39.7615	89.7368	78.3602	75.0868	56.0737	54.3716	58.5828	48.2452	51.9628	36.6504	47.6451	64.0322	51.9643	46.1506	73.1854	51.2047	50.9419	72.2366	59.3667	45.6675	40.6394
3q29	NR_003265	727956	SDHAP2	succinate dehydrogenase complex, subunit A, flavoprotein pseudogene 2	0.733483	-0.447165	0.00023368	0.0051021	2.07409	3.13265	2.76071	1.69451	2.11512	3.07118	4.31353	4.41687	5.01941	2.53663	3.70881	3.86437	2.84197	2.73695	2.83425	6.97743	7.96227	8.68627	4.43998	4.52851	3.98966	7.82126	3.05755	5.6693	6.63901	6.26112	4.99071	4.27182	3.95243	6.50762	4.44949	5.22132	4.74471	5.68704	4.71501	5.58339	5.25177	6.43079	4.94661	2.04908	2.90164
2q37.1	NM_152879	8527	DGKD	diacylglycerol kinase, delta 130kDa	0.7965	-0.328254	0.000236728	0.00514613	10.5943	8.70528	7.46154	5.36408	6.16445	6.48769	7.44354	2.77867	7.37021	7.12097	7.81512	8.37273	5.38571	6.11395	5.43448	13.6403	15.0074	15.9681	8.38427	7.69861	7.51542	8.93452	7.73657	6.65767	8.25129	8.19763	8.7655	16.3624	14.7614	11.8186	9.6166	9.89589	9.83423	9.63185	10.0555	6.92917	11.603	12.4476	11.8646	7.74179	9.23718
5p12	NR_073113	100652772	NNT-AS1	NNT antisense RNA 1	0.79806	-0.32543	0.000236499	0.00514613	1.69293	2.96822	1.47416	1.04572	2.31243	2.86649	1.59292	2.06952	2.01288	2.9808	3.03021	3.35063	3.11817	3.4726	3.24524	3.4426	3.5248	3.84751	3.99715	3.44581	3.74132	3.2813	3.57966	2.74267	3.14067	2.56596	2.34537	1.73295	1.48879	3.29767	2.88066	2.85952	2.80824	2.2919	3.06326	3.08929	3.08279	2.43886	2.36565	1.96458	1.88922
11q23.2	NM_015523	25996	REXO2	RNA exonuclease 2	1.28377	0.360384	0.000238814	0.00518019	3.78255	15.2587	35.3445	39.8852	30.2685	26.2598	7.43182	12.9239	48.527	17.1829	20.6824	12.4641	23.8748	11.1351	12.7977	6.25388	5.81292	5.60626	22.3954	21.7985	30.2938	6.48543	5.83462	8.20167	21.9067	17.6619	16.1002	4.13436	4.91952	10.1188	14.2631	13.0644	10.743	21.2471	11.9909	13.8062	13.1013	6.09122	10.6864	8.78699	6.76871
14q11.2	NM_004995	4323	MMP14	matrix metallopeptidase 14 (membrane-inserted)	1.42625	0.512231	0.000240678	0.00520929	53.045	109.234	55.2698	38.1341	55.7884	45.8137	26.287	10.1591	61.7064	11.991	12.8958	8.86687	22.3602	24.903	24.6257	4.71463	4.78921	4.32447	18.8602	17.2068	20.3822	27.1099	19.3214	18.7057	32.2771	32.7488	37.1382	42.8961	42.3497	27.8093	29.342	23.5291	23.9459	40.9446	28.9084	19.7801	18.0336	12.8576	13.3542	18.5432	18.2031
13q21.33	NM_080759	1602	DACH1	dachshund homolog 1 (Drosophila)	0.66349	-0.591853	0.00024131	0.00521168	4.66049	2.75369	4.65693	3.91692	3.13472	5.43799	7.4107	8.08144	1.31755	5.85036	7.88397	5.80577	6.31125	8.93715	8.29169	10.317	10.2923	11.0384	10.3054	10.5628	9.19541	10.5153	13.5687	12.4184	4.05916	4.26739	5.15013	7.2397	5.8776	8.87397	6.04937	7.559	7.38531	8.19174	10.8285	13.1917	4.79882	4.25395	4.32787	5.22915	5.69572
9q31.1	NM_015051	23071	ERP44	endoplasmic reticulum protein 44	1.15761	0.211151	0.000247506	0.00533053	3.60589	8.72649	11.5125	11.8896	9.33006	10.9606	6.20713	10.3322	12.9095	7.33284	7.07755	6.09214	10.1926	7.87615	9.3985	7.09866	6.65113	6.52318	8.35808	8.91268	9.72471	4.88125	4.42651	7.19034	8.44092	8.93792	8.3788	3.46388	3.23559	6.23334	7.50422	7.50146	6.94839	9.04233	8.25955	10.5145	7.27699	6.05168	8.17679	4.66762	4.79145
21q22.2	NM_005239	2114	ETS2	v-ets avian erythroblastosis virus E26 oncogene homolog 2	1.30895	0.388409	0.000247907	0.00533053	7.22125	11.0533	15.6754	9.01921	15.157	13.0265	5.15643	3.95152	13.2903	7.98328	9.07503	8.26983	10.5131	7.15149	8.15585	3.48205	3.89005	3.77827	6.95235	6.85392	7.50021	4.27451	2.92321	4.21463	11.9956	11.0569	10.2874	4.73432	4.27625	5.71584	10.172	8.33619	6.5593	8.56301	7.41113	5.75738	10.774	9.79776	10.3928	3.08848	3.68058
14q22.3	NM_006544	10640	EXOC5	exocyst complex component 5	0.791672	-0.337025	0.000248416	0.00533053	2.96019	5.53222	5.31226	5.34504	5.55584	8.70943	4.49548	8.2304	10.193	8.85563	7.91614	7.15884	10.015	11.359	9.59936	12.4673	11.2646	10.9284	6.61275	7.7901	7.82384	7.68706	7.8071	10.1047	9.90009	8.53813	8.73313	4.49659	4.09814	7.401	7.44389	7.60072	6.71712	9.0132	9.29183	12.5839	8.22536	7.0382	8.60194	5.19184	5.15117
1q25.3	NM_004736	9213	XPR1	xenotropic and polytropic retrovirus receptor 1	0.720951	-0.472027	0.0002499	0.00535086	5.32067	10.5822	7.73176	6.69893	8.22503	12.2916	9.50153	15.3202	11.2137	20.5446	21.985	21.5959	12.589	16.1308	14.0281	26.0241	27.1584	24.6931	14.2029	15.0117	14.3385	12.5032	14.3302	15.6915	14.8534	12.9276	14.306	5.43472	5.2295	12.2367	12.0485	15.4397	13.1971	13.338	17.4334	17.7816	13.0041	14.5153	16.8417	10.8685	10.8535
1p35.1	NM_178547	339487	ZBTB8OS	zinc finger and BTB domain containing 8 opposite strand	1.27027	0.345138	0.00025072	0.00535693	2.90351	6.91307	12.1556	14.548	8.99433	9.1346	5.57434	10.4501	12.966	9.02893	7.45556	5.86005	8.79323	7.91293	7.29962	5.96911	5.0865	4.69677	6.73358	6.72286	7.62784	4.17129	5.24563	4.84817	5.90712	5.73428	6.33769	3.54611	2.40159	5.81212	5.81068	4.62479	4.96497	6.44961	6.80264	6.26624	7.24794	5.45029	5.62514	5.81732	4.94829
3q21.3	NM_001204890	100534599	ISY1-RAB43	ISY1-RAB43 readthrough	1.22676	0.294857	0.000253459	0.00540388	2.1814	4.85949	6.81495	4.56264	5.48375	5.20031	3.98163	3.39788	9.7231	4.04825	4.7623	3.84951	4.4681	4.51164	4.06826	3.29218	2.79272	3.35635	5.07769	5.56876	6.01425	2.65669	2.08723	3.17819	5.20422	4.90529	5.75809	1.97247	1.96157	2.84202	4.41508	4.42723	3.85632	5.69605	2.99342	4.60421	3.66643	4.25537	4.21127	3.57623	2.21611
17p13.3	NM_021962	29	ABR	active BCR-related	0.730977	-0.452103	0.000254025	0.0054044	10.4063	8.23725	9.19479	5.13072	5.38602	5.99877	8.06739	2.1749	5.64355	8.13462	10.4589	11.0315	4.89161	6.1266	6.08791	11.6636	13.6064	17.0346	13.0905	11.9573	16.1838	12.3657	6.46671	9.55497	8.93703	7.0718	9.95619	13.9556	10.6066	8.98755	10.6642	12.1146	10.4222	8.49496	9.11489	6.47334	9.89824	11.7805	8.40796	6.96654	7.04055
19q13.33	NM_006270	6237	RRAS	related RAS viral (r-ras) oncogene homolog	1.39493	0.480196	0.000256446	0.0054443	27.1524	34.4301	29.4784	25.248	17.4653	13.2688	11.3095	5.19187	25.4282	10.2131	10.4349	9.27925	12.9575	12.7626	12.2629	1.47902	1.33829	1.67317	17.5591	14.1238	18.9822	7.38672	7.16092	7.04421	13.5561	18.559	20.6159	12.9165	12.8028	7.04995	18.2521	17.6368	18.6708	21.4821	16.4312	11.3455	9.79067	8.24213	7.52026	12.3032	12.4397
12q24.31	NM_002560	5025	P2RX4	purinergic receptor P2X, ligand-gated ion channel, 4	1.58216	0.661894	0.000257536	0.00545582	6.28947	6.08764	8.98788	8.82466	7.49404	6.60585	3.72656	3.58433	9.63701	3.02166	2.56451	2.80162	3.70342	3.8755	4.17909	2.29675	1.64989	1.98059	3.85318	3.69288	3.64163	5.04721	3.00917	3.38515	4.86362	6.58619	4.78224	5.9447	4.72737	2.79279	5.11542	3.86334	3.84769	7.66759	4.5621	3.73161	3.05293	2.24278	2.37754	4.6833	5.18048
4q22.1	NM_153757	266812	NAP1L5	nucleosome assembly protein 1-like 5	0.693582	-0.527862	0.000264458	0.00559059	2.60989	3.39263	3.36164	2.92203	2.42869	4.1665	5.37884	9.36472	3.15549	7.91925	8.82224	7.5571	4.39702	7.81797	5.54595	18.0308	16.5908	14.7688	5.6858	6.60245	6.35554	5.76639	8.60576	9.94607	7.07449	4.65548	4.79589	2.59189	2.34759	5.26646	4.51471	5.50774	4.35242	5.7382	6.25022	7.029	5.98577	5.73841	8.03852	3.43027	2.89542
9p13.2	NM_194330	152006	RNF38	ring finger protein 38	0.782585	-0.35368	0.000266253	0.00561665	2.34362	4.7771	4.9515	4.84226	4.08503	5.97902	3.73648	6.58131	6.34419	5.82931	6.79742	6.09355	7.83157	6.36039	7.84201	10.1464	12.1544	8.24231	8.94869	7.0162	4.62999	8.38547	7.98023	7.64648	6.926	4.78118	5.78053	3.99992	3.14118	4.94145	6.10089	7.66062	6.24275	6.60139	8.11207	11.0847	5.59839	6.5235	6.33611	4.72508	4.38218
22q11.21-q11.22	NM_013313	29799	YPEL1	yippee-like 1 (Drosophila)	0.723547	-0.466842	0.000267041	0.00562138	7.92194	5.7308	4.06424	3.92787	4.15237	5.51872	7.04606	5.19461	1.46257	7.08627	7.24749	8.474	5.90132	9.59268	4.91437	12.5724	12.0745	11.8281	6.86679	6.63115	6.27594	10.297	9.61371	9.50295	7.1913	7.43903	7.0947	6.90836	6.86239	5.7146	6.71946	7.1573	7.13985	4.42366	6.78628	6.38926	5.48495	6.5769	5.1968	6.64136	6.95064
6p25.2	NM_183373	221749	PXDC1	PX domain containing 1	1.56762	0.648578	0.000272379	0.00572167	7.40315	20.1657	13.7629	11.5265	10.4241	8.57578	7.1617	3.97284	14.4851	7.87138	7.79841	6.74118	6.37791	4.5796	3.84536	3.55746	3.65516	4.27918	7.40257	5.0426	8.59529	5.61014	6.20293	5.36237	5.50446	5.63858	6.89713	6.29279	6.19192	3.76836	6.75618	6.41162	6.73168	7.08753	5.38818	4.46359	5.12678	3.09511	3.92253	4.43352	5.15343
Xq28	NM_031462	83692	CD99L2	CD99 molecule-like 2	0.789597	-0.340811	0.000278743	0.00583081	17.8898	13.2974	13.2447	6.61887	15.2612	14.6397	15.8894	5.13512	10.4884	21.5898	22.69	20.4186	11.6147	17.4941	10.9186	30.7362	32.0164	31.5409	13.3751	12.8171	13.097	16.4274	13.892	12.4529	14.0741	14.4322	13.6831	16.3245	16.0792	13.8109	15.876	17.2552	12.1467	20.1974	12.7784	12.8387	19.2992	19.3064	18.7308	14.4703	13.417
4q21.22	NM_021204	58478	ENOPH1	enolase-phosphatase 1	0.793527	-0.333649	0.000278562	0.00583081	3.67795	8.24696	7.89804	7.36808	8.74928	9.52803	6.84364	12.9408	12.675	10.685	13.8502	15.8174	9.97229	11.6736	10.87	26.0416	21.6191	17.7479	9.74437	10.6672	10.802	11.1585	11.5887	13.4665	12.0767	9.21397	9.1782	6.71285	5.24218	13.7085	10.4293	11.5034	8.92676	10.8135	10.8745	13.6103	13.9204	11.9964	14.8847	7.17928	7.8807
17p11.2	NR_123730	339260	LOC339260	n/a	0.787229	-0.345144	0.000279352	0.00583132	2.01687	0.985761	0.928149	1.74514	0.755901	1.02951	1.59974	1.32268	0.434227	0.869013	1.30198	1.08076	2.21331	3.02863	2.23228	3.43369	2.93759	3.28265	2.57713	2.52199	2.34267	4.32111	4.06581	4.1818	1.5771	1.83979	1.80828	2.19067	2.07135	1.64431	0.978062	1.4988	1.44601	0.303035	0.918998	1.18774	1.67239	1.90497	1.78407	1.99482	2.11193
1q44	NM_001278196	10472	ZBTB18	zinc finger and BTB domain containing 18	0.55883	-0.839518	0.000280274	0.00583836	1.65574	1.72879	4.21664	1.92493	2.68331	3.0402	0.758265	1.89532	2.677	10.6473	16.4863	26.8974	5.3467	8.2535	4.92241	5.20067	5.27021	5.38166	7.45786	6.10535	6.32719	4.1295	5.3195	4.12797	3.77429	2.49872	3.60534	3.39706	1.97865	5.62619	1.099	5.14125	4.08453	3.31725	2.87642	4.11877	5.79654	3.73388	5.23913	2.81611	3.32134
13q33.1	NM_024089	79070	KDELC1	KDEL (Lys-Asp-Glu-Leu) containing 1	1.12756	0.1732	0.000283695	0.00588992	3.20152	9.96561	6.46995	7.33794	8.6444	8.53765	5.59641	8.24356	5.48613	6.89666	7.07144	5.70609	10.5273	7.74844	7.58226	3.31618	3.38934	3.25809	10.678	10.1224	10.6398	4.07575	3.7027	5.36081	7.33712	6.79297	6.56947	2.66328	2.24041	5.82257	6.11231	7.38216	6.38474	6.75918	5.48417	8.24944	5.32101	4.18464	5.74348	4.77028	3.72406
19p13.2	NM_004230	9294	S1PR2	sphingosine-1-phosphate receptor 2	1.55001	0.632274	0.00028452	0.00588992	8.45247	10.236	8.88269	7.59565	5.90278	5.47649	5.11454	2.94851	7.82181	3.4573	3.46269	2.44552	4.90526	5.20149	4.8988	1.6616	1.9923	1.72243	5.32696	4.13977	5.71537	3.72086	2.68316	3.18668	5.03498	5.59261	6.56531	5.8629	5.39822	4.20993	5.32559	4.42105	5.25072	5.21654	4.71234	4.35738	2.37546	2.28895	2.15911	3.05427	2.94181
3p22.1	NM_001042646	22906	TRAK1	trafficking protein, kinesin binding 1	0.848659	-0.236744	0.000284467	0.00588992	7.34943	7.63214	8.32605	4.77755	6.42063	7.31595	10.3881	5.6078	7.30505	6.50121	8.47001	6.93677	7.56554	9.41868	7.07836	15.4517	15.2516	14.7379	9.50583	8.87886	9.97594	11.0556	9.86669	11.0858	8.88022	7.42451	8.23057	7.02164	7.1139	10.275	8.40147	9.66426	8.81916	7.62597	8.99262	9.03863	9.39765	10.6497	8.38955	5.71255	6.15872
6q25.1	NM_138785	116254	GINM1	glycoprotein integral membrane 1	1.13838	0.186982	0.000285904	0.00590484	8.41465	19.2684	25.0735	26.487	21.9734	23.8256	11.919	22.2663	30.7522	16.2405	16.0561	11.4608	16.5841	14.0189	14.2265	12.5881	11.1846	9.74234	18.7933	20.8462	23.7026	9.27435	11.2483	15.4314	20.5465	15.0293	15.4816	7.7448	7.25657	19.9002	17.4499	16.9163	16.7168	20.5077	14.0365	17.925	18.1921	10.6618	15.3459	11.9618	10.1067
3p21.31	NM_032316	84276	NICN1	nicolin 1	0.907714	-0.13969	0.000286424	0.00590484	5.80868	4.07151	3.40562	4.48121	3.17686	2.71016	5.88727	4.53342	5.01697	3.97356	4.25897	4.47036	3.84487	4.70104	4.30477	6.5746	6.76312	6.68871	3.89493	4.02031	4.03865	6.03429	5.05995	4.70209	4.25546	4.87743	4.53426	7.47754	6.4993	4.40554	4.44087	4.43829	4.99451	6.11887	5.23499	4.67065	4.26552	5.05333	4.31086	5.0516	4.19669
1p12	NM_006623	26227	PHGDH	phosphoglycerate dehydrogenase	1.07936	0.110177	0.000289275	0.0059513	70.1137	101.244	72.1884	73.1358	67.5846	65.8425	48.664	29.8316	61.7605	40.8062	42.699	37.3752	46.2895	51.2897	50.992	25.0683	23.7886	26.2971	43.1939	36.1256	42.4345	34.6285	40.2009	28.1004	52.3382	70.0149	72.3039	45.6807	54.082	31.1133	53.9318	53.8984	53.6833	72.8369	46.2722	41.3696	43.5158	36.3375	35.1743	42.6431	45.2989
15q15.1	NM_007236	11261	CHP1	calcineurin-like EF-hand protein 1	1.14901	0.20039	0.000292184	0.00598648	10.8348	18.0968	35.6255	32.9309	25.0022	24.8021	16.4602	18.7044	36.8443	14.563	19.7791	15.1059	18.9749	18.8092	18.2142	16.0195	16.1866	15.744	20.3986	16.7889	22.1642	13.8468	13.9672	15.0201	19.7953	16.3582	16.0911	9.12702	7.73718	19.491	20.3308	21.9382	18.8912	21.0593	18.7427	20.7627	14.4311	13.0051	13.5509	8.89877	9.48603
8q21.13	NM_005536	3612	IMPA1	inositol(myo)-1(or 4)-monophosphatase 1	0.7042	-0.505943	0.000291934	0.00598648	1.22855	2.76145	2.38255	2.95981	0.934641	1.91421	1.96434	4.23012	2.5643	4.76792	5.66082	3.77953	3.90453	5.09467	5.17591	5.25768	4.12148	4.30136	2.09331	3.09043	2.99338	2.21735	2.90232	3.50169	3.44669	2.79374	3.13962	1.81638	1.42065	3.37481	3.04058	3.76116	3.73099	4.21219	4.84607	6.02465	4.06716	3.20288	3.23482	2.81305	2.34369
11p15.1	NM_005013	4925	NUCB2	nucleobindin 2	1.16318	0.21807	0.000293796	0.00600717	8.24864	36.9171	23.5917	19.6044	38.0395	39.2561	20.1218	36.5022	31.5866	27.6373	18.7854	13.9558	33.0642	21.9155	36.1176	11.6782	11.0023	11.7859	20.4126	20.7402	21.5542	8.41629	5.56171	11.1423	36.8832	35.663	29.5202	10.2608	8.28246	8.56352	23.7269	23.9551	20.0015	32.2562	23.9811	29.6101	16.162	12.831	16.5664	11.7999	10.7926
1q25.3	NM_052966	116496	FAM129A	family with sequence similarity 129, member A	1.80264	0.850109	0.000294852	0.00601643	0.894794	6.82119	2.38273	1.10552	5.5163	6.3175	0.932436	0.839879	9.67433	1.08392	1.36833	0.595946	2.46971	2.3596	3.08486	0.743347	0.593977	0.527177	2.54471	2.18832	2.70806	1.29334	0.849642	1.1117	2.81207	2.69337	1.94095	1.0027	0.868676	1.88166	2.19861	2.23312	1.98106	4.22203	2.19015	2.21782	0.880175	0.426975	0.671843	0.578777	0.368714
14q32.11	NM_001102368	80017	C14orf159	chromosome 14 open reading frame 159	0.770237	-0.376625	0.000299453	0.00607304	6.70332	4.05545	5.20596	3.54365	1.83588	2.73183	4.72005	4.05456	3.65081	3.83555	4.92373	3.97683	3.12498	4.21282	5.71709	6.66977	5.86005	5.76585	8.28862	7.39094	7.55208	3.66043	3.8986	2.43553	5.81383	6.33076	6.2643	9.10929	9.50442	7.02503	4.06976	8.16164	4.12901	5.97703	6.05557	4.23098	6.0831	6.72557	7.0229	5.07779	6.01558
19q13.33	NM_014601	30846	EHD2	EH-domain containing 2	1.82343	0.866656	0.000299345	0.00607304	5.95201	21.6151	15.5635	10.7557	11.8593	10.051	4.42104	1.24493	11.4749	3.2328	3.24102	2.31583	6.90262	2.58773	3.23665	0.543641	0.693511	0.703701	6.73531	6.17071	8.18346	4.4159	3.30531	3.29804	8.08526	8.82571	9.97741	5.11885	5.63295	3.21597	8.35604	5.77909	6.667	8.7071	7.18658	4.71454	2.47703	1.48256	1.63428	3.15241	3.06519
1p21.1	NM_001288821	118427	OLFM3	olfactomedin 3	0.570405	-0.809941	0.000298355	0.00607304	1.26643	0.083482	0.768186	0.979091	4e-05	0.723329	1.9679	4.74869	0.244008	2.48037	1.62628	2.04851	2.60514	7.26159	9.05842	2.63449	2.39628	2.96722	0.729256	1.64444	1.06909	1.79567	0.974549	1.20805	4.2323	3.58349	4.31726	5.41515	3.13324	4.69043	2.72478	3.36308	2.75751	4.07232	4.38807	3.16243	2.02499	0.96219	1.7985	3.32964	2.35257
Xp11.4	NM_001126055	8573	CASK	calcium/calmodulin-dependent serine protein kinase (MAGUK family)	1.16493	0.220244	0.000301909	0.00611045	3.00845	5.93998	6.71668	4.76215	9.58447	10.6387	4.27377	7.26228	7.39964	5.70107	6.15227	2.96283	9.16656	4.92787	6.83903	2.33197	3.25591	2.9407	4.63368	5.59364	4.95689	4.15378	2.02556	4.55239	7.50521	8.64214	7.00982	2.04505	1.71179	3.55687	6.07106	5.47136	4.98432	10.9482	7.41571	8.66356	7.08186	6.4409	7.10988	2.5896	3.20655
2q37.3	NM_015148	23178	PASK	PAS domain containing serine/threonine kinase	0.712903	-0.488222	0.000303713	0.0061345	1.88246	0.964622	1.47363	2.06541	0.501254	0.636407	2.18203	0.65251	1.07732	2.94558	2.42652	2.76947	1.61737	2.70256	1.75049	2.03517	2.5676	2.69637	1.59572	1.61035	2.26164	2.74729	2.22095	1.80906	1.78433	2.37774	2.03322	2.12951	2.93734	1.93669	2.58841	3.57991	2.70827	2.06379	1.56727	2.54326	2.12784	3.13146	2.28196	2.83378	1.63299
19q13.32	NM_005184	808	CALM3	calmodulin 3 (phosphorylase kinase, delta)	0.924758	-0.112853	0.000305936	0.0061545	100.501	85.8515	132.447	81.7338	98.1167	101.11	113.961	64.9096	72.633	100.883	124.027	104.695	109.863	127.909	86.4744	184.655	178.434	174.862	121.713	100.072	108.629	110.909	99.849	97.727	106.642	102.887	109.29	104.697	94.6317	80.3351	94.5467	105.566	87.5635	114.485	102.424	88.4745	93.659	103.257	99.3855	72.0412	68.6012
7q36.1	NM_001136044	83590	TMUB1	transmembrane and ubiquitin-like domain containing 1	1.3126	0.392423	0.000305438	0.0061545	14.9985	18.1846	18.6529	15.6404	12.2706	8.33671	17.7605	12.422	16.47	6.42527	7.71689	9.63549	9.84105	8.77808	7.80492	5.72828	3.64059	5.73795	11.8753	8.61515	10.74	6.34033	7.52957	7.2681	7.6715	10.201	13.3431	12.025	10.8068	4.76381	12.059	10.797	13.2255	10.362	12.8163	7.47916	8.89202	6.87673	8.1322	14.1574	11.1199
10q26.13	NM_002775	5654	HTRA1	HtrA serine peptidase 1	1.18243	0.241756	0.000310778	0.00623932	13.8289	25.0512	21.8292	18.7472	18.4856	17.1229	23.3721	30.5219	10.8617	9.78705	10.6303	8.14597	10.0402	8.25104	13.6473	10.0814	9.38225	9.25783	12.5101	11.2664	12.2767	15.2788	13.6663	13.5825	15.6177	14.1823	15.0927	11.0513	10.1227	17.6804	13.8455	14.3675	12.5237	16.7689	15.9493	14.6081	17.3675	12.9024	17.499	12.6251	11.5019
1p12	NM_001080470	90874	ZNF697	zinc finger protein 697	0.850407	-0.233774	0.000314316	0.00629768	3.10303	3.21222	3.07179	2.1898	2.43453	3.57576	3.50812	3.62431	3.30337	2.925	4.02152	3.28678	2.87668	4.9502	4.33529	8.41682	8.47146	8.94496	3.14318	3.17453	3.12775	4.0036	3.61555	4.10229	4.83772	3.83548	4.13907	3.00212	2.50426	4.37103	3.46795	3.70719	3.4597	3.51962	4.0596	3.6371	3.74958	4.16916	3.9959	2.36074	2.2149
17q11.2	NM_001085454	28964	GIT1	G protein-coupled receptor kinase interacting ArfGAP 1	0.555819	-0.847314	0.000316095	0.00632063	11.5391	3.76756	1.73654	1.19225	3.88671	4.26456	16.3227	4.65725	0.73463	11.5947	10.6265	18.5999	3.14328	5.80456	2.24167	26.7433	25.3367	29.4034	5.46245	4.12373	4.95688	9.99996	11.8471	11.9381	5.99357	7.57513	9.16884	13.8804	11.5805	5.44347	7.21815	6.72553	10.1446	4.54018	9.6794	5.70862	8.40396	11.3977	10.2642	6.9997	8.78786
22q11.22-q11.23	NM_002073	2781	GNAZ	guanine nucleotide binding protein (G protein), alpha z polypeptide	0.633455	-0.658686	0.000317953	0.00633983	12.4995	11.0541	6.32268	5.32557	9.92021	11.2063	14.5315	7.02997	1.44864	21.232	23.5799	24.8736	9.68531	12.9211	5.91021	45.1144	43.573	46.5757	9.87734	9.07704	9.5726	16.0219	15.8708	15.6268	12.1194	11.0289	13.445	17.5522	14.5251	13.1626	13.9758	17.1571	14.6701	11.17	14.8987	11.829	20.7571	21.5312	21.6024	15.1418	14.0732
19q13.33	NM_020650	57333	RCN3	reticulocalbin 3, EF-hand calcium binding domain	2.25226	1.17137	0.000318326	0.00633983	5.82971	27.0369	23.212	18.1933	43.4317	33.1805	12.2036	5.36789	12.0507	5.74861	5.09921	5.92279	4.08826	9.17449	7.52792	4.01751	4.15589	3.97696	3.67004	3.25298	3.81627	5.09453	4.84175	4.49928	16.5363	19.0085	21.9955	8.71787	7.10083	2.85205	7.70313	7.1982	7.89888	3.35778	3.02636	1.85463	3.21604	1.90545	2.0925	6.76019	6.53398
3p22.2	NM_001106	93	ACVR2B	activin A receptor, type IIB	0.747264	-0.42031	0.00032034	0.00636724	5.5334	5.50646	7.90693	5.4208	5.75405	9.75075	7.75534	5.45928	10.6838	6.41778	9.00671	6.61605	12.0621	13.8401	12.5404	12.7988	13.6933	13.1498	15.2807	16.0492	13.3861	11.8807	8.94425	11.8045	11.1554	9.52594	9.57257	5.7204	5.98535	11.0293	9.78339	12.0176	12.2586	10.7845	10.9179	13.4949	8.09889	9.75691	8.18141	4.84941	6.01209
9q33.1-q33.3	NM_018387	55342	STRBP	spermatid perinuclear RNA binding protein	0.691742	-0.531695	0.000322065	0.00638879	0.905932	4.56493	2.89026	3.04001	3.43147	6.31989	4.35942	8.39586	5.79278	5.55653	5.89468	4.65685	7.42117	7.322	7.37061	9.43884	10.4777	11.2586	6.94376	5.89142	7.0963	4.74844	4.06556	6.07293	6.73628	5.62903	6.22922	3.40791	3.54083	3.89563	6.34889	7.36861	6.31345	7.11809	7.96423	8.69154	7.2048	7.10129	7.41477	3.76913	4.26327
19p13.3	NM_019107	56005	C19orf10	chromosome 19 open reading frame 10	1.1919	0.253265	0.000324549	0.0064253	52.6748	87.5769	56.497	68.298	53.7422	41.0123	46.408	22.7107	52.5921	40.3862	34.086	28.1325	19.387	33.192	19.5749	18.9228	17.2535	16.5584	24.0535	19.6393	20.7081	23.0045	29.5978	21.4953	33.0508	44.3505	44.601	46.8409	48.4956	21.2698	36.3399	35.9239	31.5731	57.8087	49.0871	34.4206	27.8908	24.2019	24.5112	41.086	40.1658
8q12.2	NM_017780	55636	CHD7	chromodomain helicase DNA binding protein 7	0.725857	-0.462242	0.000328008	0.0064745	5.06517	3.69197	5.95955	3.63185	4.11461	6.80074	9.82464	7.42195	6.69304	8.31147	11.032	8.97562	14.5117	12.9935	13.0887	11.7551	11.6817	12.9603	16.3195	15.4507	13.0806	11.3391	7.70346	10.2211	6.18284	6.18627	7.10387	4.46095	4.61887	5.44849	6.87107	8.95994	8.08465	7.47592	8.305	10.3235	6.19233	7.78434	5.7827	4.69013	5.4749
16p13.3	NM_138440	114990	VASN	vasorin	1.66598	0.736373	0.000328332	0.0064745	12.2019	64.3181	15.2533	11.4898	12.1763	9.45314	7.65277	2.58661	15.9685	3.79259	3.40277	3.71708	11.3858	4.2122	5.71558	0.981996	0.731362	1.93274	7.64679	6.53174	9.59049	4.77261	2.86648	3.25849	10.2723	11.4261	11.3847	10.2208	9.76138	4.77048	10.0823	7.6012	8.22425	9.41999	8.7389	5.70308	4.88323	4.01762	4.30564	6.41063	7.65435
2q35	NM_152862	10109	ARPC2	actin related protein 2/3 complex, subunit 2, 34kDa	1.24121	0.311748	0.000329809	0.00647465	21.1044	50.4391	55.5701	56.5749	60.3345	60.5858	33.6656	46.9633	70.0624	22.2138	34.2531	21.3786	49.8025	26.5915	30.5723	31.7016	34.3941	33.3695	39.8319	37.3136	41.7468	11.9669	14.468	19.3651	31.4399	31.4303	44.3442	10.4451	10.3538	13.6111	30.897	22.4361	29.0186	29.9953	21.5521	23.9291	26.8735	17.9623	23.6539	15.6786	12.3375
22q13.1	NM_001894	1454	CSNK1E	casein kinase 1, epsilon	0.817134	-0.291356	0.000329659	0.00647465	46.0018	22.1947	22.6806	20.2928	25.0652	19.9539	40.7797	10.6889	19.0071	36.6612	39.5319	41.2601	27.8665	38.0669	14.2118	42.6281	43.4645	46.5369	31.7788	29.1694	41.5188	34.3427	37.7529	33.4564	28.7418	28.48	28.4616	41.3975	40.5462	23.314	36.2933	30.5232	37.4867	28.6537	26.1958	20.3461	29.4956	32.5979	28.0448	33.715	41.2682
4q13.3	NM_005420	6783	SULT1E1	sulfotransferase family 1E, estrogen-preferring, member 1	2.05804	1.04127	0.000330286	0.00647465	5.534	9.6867	4.88716	4.50847	13.9863	16.8214	1.44629	2.91069	0.545979	1.28076	1.61582	0.868978	3.53489	9.52265	6.93815	0.401422	0.434597	0.333905	0.383784	0.802059	0.498876	1.68038	1.15058	3.13034	3.26512	1.91568	3.0277	2.26887	2.2144	6.20345	4.21233	2.20243	3.7795	2.93972	2.29736	3.49054	3.03474	2.84194	3.49218	1.50557	1.38252
2p13.1	NM_006636	10797	MTHFD2	methylenetetrahydrofolate dehydrogenase (NADP+ dependent) 2, methenyltetrahydrofolate cyclohydrolase	1.20505	0.269097	0.000335216	0.00655841	6.37553	38.5614	32.7	32.9554	48.2776	48.8864	8.62324	21.7525	47.2911	21.5419	20.4057	12.8982	34.8885	24.867	31.8345	10.5478	10.8011	7.68377	21.0406	22.9119	26.8537	11.8028	8.18807	12.9306	36.1401	36.1765	32.5714	4.49954	5.53701	15.4579	19.8524	19.4433	15.8834	33.0479	17.6737	26.8365	13.3044	8.29799	12.5442	8.1907	7.43474
2p13.1	NM_001287491	200424	TET3	tet methylcytosine dioxygenase 3	0.85188	-0.231278	0.000336694	0.00657444	3.9671	4.6416	3.62486	2.75237	3.18059	4.63047	4.73374	2.49655	4.6086	4.17457	4.62478	4.64685	4.89457	5.45988	4.08709	6.1353	6.58922	6.42948	5.44729	5.2481	5.44435	5.18129	3.5411	4.60511	4.69136	4.60248	5.51343	4.14585	4.51008	3.83049	4.54433	4.9192	5.69202	5.10887	5.33309	6.01656	3.65327	4.79705	3.57669	2.54882	3.06117
16p13.12	NM_016561	51283	BFAR	bifunctional apoptosis regulator	1.11648	0.158961	0.00034101	0.00663275	6.31597	11.8529	17.5837	18.3289	16.8006	16.3929	10.0353	13.7368	20.6525	10.3148	13.0912	10.2334	15.6064	13.4818	15.3396	10.3031	10.6476	8.86927	12.4309	12.4855	13.7216	8.98174	10.5457	10.2135	15.0807	11.9857	12.849	5.10022	4.83377	12.3303	12.7568	12.1058	9.45074	13.5524	12.6782	12.5537	12.4193	9.83219	12.8267	6.73217	6.31697
2p21	NM_139279	90411	MCFD2	multiple coagulation factor deficiency 2	1.1074	0.147176	0.000340875	0.00663275	9.03901	25.3953	32.1909	23.7782	22.967	25.8099	16.8609	17.1228	41.0319	17.345	16.6071	12.7661	25.7352	18.8502	26.7206	9.89979	7.91373	9.36367	20.528	24.7684	24.9617	11.3798	9.78223	12.2714	25.3935	23.394	22.1813	10.5479	10.3426	22.8876	22.5499	25.5737	21.8981	26.8865	19.0086	25.6358	16.4101	16.3854	18.6177	10.6054	9.17241
9q21.13	NM_001490	2650	GCNT1	glucosaminyl (N-acetyl) transferase 1, core 2	1.57642	0.656656	0.000343659	0.00665831	0.708518	3.73878	4.20936	2.87729	4.80396	3.79909	0.554001	0.527271	5.40031	2.11161	2.47952	1.11461	3.52502	1.3915	2.7452	0.538213	0.41884	2e-06	2.72501	3.19745	3.36232	0.494655	0.982964	0.836583	3.79602	1.75327	3.38423	0.374126	0.543977	0.364082	3.37998	2.51289	4.22068	3.03747	2.84873	0.782584	0.841772	0.517449	0.377702	0.942346	0.362822
17q12	NM_032351	84311	MRPL45	mitochondrial ribosomal protein L45	1.17799	0.236326	0.000343388	0.00665831	6.72445	12.5107	20.8263	22.8598	14.1846	14.9137	7.851	14.3124	19.6028	9.87489	10.832	9.94914	12.2622	11.4054	13.3886	8.70931	8.85912	7.58582	13.3279	12.8142	14.7647	7.28508	10.9028	8.15784	10.722	11.3527	11.0089	7.12431	5.83458	8.73592	12.8003	11.1717	10.1807	13.7798	12.9974	14.5407	8.68357	7.29008	8.17907	5.40455	5.14381
1p36.22	NM_004958	2475	MTOR	mechanistic target of rapamycin (serine/threonine kinase)	0.84148	-0.248999	0.000344738	0.00666627	5.57622	7.29326	7.89564	3.74177	6.41783	7.95429	9.15665	5.40653	13.1822	6.34223	9.2339	8.10127	10.5779	11.7695	11.9725	11.3527	11.1833	11.4849	10.3563	9.56477	8.80547	10.4984	7.50314	8.02295	8.05694	8.09285	7.74013	7.35051	7.20225	11.4405	8.48295	11.805	9.98574	9.2123	8.38624	7.46949	9.26221	11.8054	9.8142	5.49067	4.75253
15q23	NM_018003	55075	UACA	uveal autoantigen with coiled-coil domains and ankyrin repeats	1.59069	0.669648	0.000349164	0.00673881	1.10887	2.37883	4.13244	1.62335	2.83143	4.40609	1.73026	1.26341	5.01487	1.3976	1.43154	0.77587	4.20733	3.24696	5.58313	0.318578	0.248724	0.480577	2.95314	2.81431	2.54985	0.969399	0.965988	0.978891	2.31927	2.74537	2.77801	0.829239	0.170634	0.601127	2.47025	2.17423	2.20105	2.96431	2.47304	2.60965	0.329897	0.662868	0.49298	0.666775	0.858246
11q23.3	NM_001655	372	ARCN1	archain 1	1.08939	0.123515	0.00035263	0.00675344	12.8256	35.7754	40.3737	27.5397	49.2862	51.472	26.8623	29.5032	74.9721	29.9803	31.4239	20.806	45.8386	31.2514	42.3507	17.5328	17.5424	19.5927	31.7541	31.1408	35.1127	17.7203	12.6313	23.3566	44.7692	36.9113	38.0865	12.5174	11.7419	16.2705	35.2817	33.4276	33.6801	43.2363	34.7016	44.3897	23.5433	22.8096	25.7594	14.5129	15.4477
19p13.3	NM_001172673	60680	CELF5	CUGBP, Elav-like family member 5	0.686534	-0.542596	0.000351529	0.00675344	2.88747	2.28689	1.01763	0.764609	1.59451	2.46353	3.88261	1.72049	0.349412	2.52423	3.08689	3.00956	1.83595	3.05802	1.17271	9.03927	9.45738	9.50708	1.75811	1.59252	1.87569	4.42703	3.92328	4.02332	2.72365	2.93232	2.9512	3.69172	3.07488	2.77847	2.94557	3.83645	3.46466	2.40314	3.5113	2.52291	2.3995	3.52374	2.83577	2.09882	2.97709
1q21.3	NM_000748	1141	CHRNB2	cholinergic receptor, nicotinic, beta 2 (neuronal)	0.762397	-0.391385	0.000352396	0.00675344	4.19582	1.35044	1.08294	1.11733	0.950263	1.4183	4.82898	2.03784	0.185218	3.23994	4.04957	3.75351	1.70399	2.76711	1.31291	6.71811	7.02407	8.47552	2.47175	1.96454	2.06339	4.11738	3.82743	2.96647	1.59621	2.11254	2.28716	3.17723	3.015	1.43646	1.89727	2.1812	2.10962	1.92636	2.85994	1.5093	1.79295	2.66316	1.57223	1.96782	2.49574
9q33.2	NM_198252	2934	GSN	gelsolin	1.26654	0.340893	0.000352277	0.00675344	51.6702	56.2668	65.8765	57.7681	47.4558	36.0344	56.9558	20.3488	78.0932	21.8432	23.464	17.1344	18.9444	24.8339	23.0589	20.9631	18.6547	21.2944	31.7798	23.4305	22.7681	26.7694	33.0419	24.5962	37.8899	36.9487	38.3694	32.0549	35.4221	19.2388	39.893	30.3053	33.9537	42.0275	40.9766	28.2361	23.204	19.28	21.2858	22.0304	22.5738
1q23.1	NM_001878	1382	CRABP2	cellular retinoic acid binding protein 2	1.13427	0.18176	0.000355934	0.0067777	135.145	103.012	201.459	146.781	134.731	97.2162	118.228	44.6181	193.425	78.3358	82.7893	51.4227	52.706	60.0857	41.2892	15.5077	15.6821	12.6705	85.6825	82.052	84.2197	44.4012	44.4297	43.7966	81.2584	114.147	110.897	89.78	93.4742	47.1474	129.845	120.709	115.446	160.289	126.257	94.1882	107.585	88.6031	83.1416	102.214	74.3063
6q22.33	NM_001012279	387104	SOGA3	SOGA family member 3	0.562134	-0.831015	0.000355845	0.0067777	3.85747	3.35759	1.31374	1.1012	3.42247	5.9963	8.47728	6.91992	0.392513	7.26597	8.16755	8.07458	4.70157	7.37207	4.53709	21.7994	21.9263	22.8266	4.61234	4.36592	3.55265	9.97972	9.04053	12.031	5.53156	5.07079	5.58433	3.66515	3.7272	4.07265	5.46844	7.03207	6.50593	5.5802	8.40763	8.59091	6.16006	8.13702	7.72741	3.87213	4.2571
19q13.2	NM_173633	284339	TMEM145	transmembrane protein 145	0.78552	-0.348281	0.000355226	0.0067777	2.89849	1.6644	0.593604	0.532226	0.594684	0.971813	3.7066	2.91249	0.136579	1.64039	1.39046	2.00054	1.14534	1.65867	1.17008	5.16816	6.35991	6.56073	0.896051	0.913252	0.784433	5.402	3.56901	3.8746	1.64975	1.62753	2.22865	3.48649	3.60604	2.00941	1.3537	1.87487	1.91041	2.12445	2.29877	1.94039	2.03549	2.28803	1.85242	2.00866	2.68537
2q37.3	NM_030768	80895	ILKAP	integrin-linked kinase-associated serine/threonine phosphatase	0.876098	-0.190836	0.000359136	0.00681265	8.6257	8.84381	7.8358	7.06188	7.99429	9.75413	9.0876	11.9933	8.6825	14.7752	14.609	14.0657	13.0597	12.4662	8.97003	14.2027	12.694	13.7218	11.4715	8.87417	10.7603	10.9237	13.8927	9.77561	9.19643	9.18156	8.44412	8.33813	7.83701	7.83445	10.2934	10.0918	10.189	9.69503	8.91598	9.73488	9.53624	9.28397	9.23847	8.44065	11.0276
6p21.1	NM_033112	88745	RRP36	ribosomal RNA processing 36 homolog (S. cerevisiae)	1.13478	0.182417	0.000358521	0.00681265	10.5877	15.5128	23.0082	19.6345	21.4588	20.4377	16.766	17.4367	24.7685	18.0859	22.7997	18.4603	17.1722	17.3196	16.3621	15.4765	14.4587	13.9804	13.2155	12.2571	13.7732	12.3462	12.5508	10.2623	15.6183	15.5064	16.5688	8.93391	8.58258	12.8386	12.9795	14.1985	12.8413	17.3592	13.9682	14.7273	11.6348	12.8839	14.3762	7.03659	8.81466
17p13.1	NM_004860	9513	FXR2	fragile X mental retardation, autosomal homolog 2	0.868656	-0.203144	0.000360858	0.00683234	17.6882	13.9351	16.292	9.75264	11.8312	12.8387	16.5315	8.13564	15.9075	17.4621	18.6834	20.7382	13.8928	18.3991	11.009	19.4833	18.0149	17.0637	16.9764	15.6471	18.9304	15.4914	15.7468	14.9803	13.7536	13.6094	14.3188	18.7384	19.2199	15.3766	17.3757	20.3443	16.3313	14.6162	13.849	12.9751	17.5931	17.3791	16.1454	14.6906	14.9842
1q41	NM_001297754	55105	GPATCH2	G patch domain-containing protein 2 isoform 2	0.705914	-0.502436	0.000362184	0.00684446	1.1032	2.48834	2.40357	1.90088	3.16476	4.45418	2.97362	4.51527	2.38594	7.65728	6.64975	4.76683	5.66381	3.76363	5.57908	4.72853	4.19555	4.19331	5.01987	5.30835	6.10347	3.59895	2.38159	4.93825	3.96476	3.82227	4.41971	2.4737	2.20379	3.50108	3.79183	3.98719	3.71485	4.9316	4.31155	5.49009	5.25289	4.21632	4.45617	3.05252	3.48591
4p11	NM_017830	54940	OCIAD1	OCIA domain containing 1	1.09736	0.134038	0.000367324	0.00692847	7.87489	20.2853	22.9612	29.1749	25.358	24.2707	11.5374	28.6005	35.722	23.1088	18.2952	10.6188	20.1163	19.1129	21.0481	11.4977	7.75532	8.46299	15.5044	20.0472	20.7426	9.32953	9.25706	16.7121	28.795	19.4061	23.0042	7.76762	7.16596	16.7781	19.9314	17.7706	16.4787	25.3593	20.2427	27.357	22.6217	14.9822	22.8082	12.753	10.8411
2p13.3	NM_032601	84693	MCEE	methylmalonyl CoA epimerase	1.25083	0.32289	0.000371154	0.00696787	5.22948	10.2159	7.61568	8.2876	8.80443	7.41842	4.36573	6.97194	7.0899	7.47569	6.12204	6.54772	6.24448	6.99288	6.71629	2.88033	2.97965	1.93951	4.09143	4.74342	5.87196	5.46294	5.93855	3.95749	7.2753	6.04652	6.29933	4.80551	5.34022	3.45122	8.72122	8.95021	8.02032	8.86307	6.90309	6.76782	5.76607	3.80839	5.45636	5.22299	4.61608
Xq22.2	NM_206917	27018	NGFRAP1	nerve growth factor receptor (TNFRSF16) associated protein 1	0.9255	-0.111694	0.000371184	0.00696787	228.154	152.61	137.593	139.36	80.8619	76.19	120.82	210.152	80.408	197.1	206.972	189.934	104.303	110.733	100.486	129.444	118.827	118.517	106.135	96.1629	105.608	103.86	130.828	98.639	115.012	123.297	131.273	215.689	185.106	115.283	136.798	127.793	120.248	157.482	161.228	100.968	204.18	195.709	214.117	261.527	252.312
5q13.2	NM_002270	3842	TNPO1	transportin 1	0.810708	-0.302745	0.000371508	0.00696787	6.44891	8.88156	10.7856	10.3731	9.61736	15.9451	10.5704	21.7109	19.6355	14.234	14.1841	12.963	15.1201	17.8316	19.4622	20.4436	18.626	19.0469	15.6802	17.5048	15.7448	15.4812	16.8386	18.2474	17.1686	13.8313	15.548	10.4735	9.23876	13.9861	15.8806	15.95	14.0449	19.2616	20.5986	25.163	19.2745	18.2228	18.6035	10.5067	10.327
18q21.1	NM_006111	10449	ACAA2	acetyl-CoA acyltransferase 2	1.1234	0.167865	0.000373165	0.00698581	7.89613	14.916	23.9256	22.1645	24.795	23.1362	14.2865	23.3493	33.8107	16.4269	16.9684	11.3819	25.1724	19.2938	25.9365	8.52687	7.21728	7.5952	23.6352	24.3939	25.8644	9.01144	7.32089	11.1712	22.1906	18.6766	18.0142	6.84486	6.30516	12.6363	16.7034	16.4171	15.262	23.7856	17.341	22.7494	18.0861	14.1974	17.178	9.05422	8.84051
1q25.2	NM_004319	460	ASTN1	astrotactin 1	0.577857	-0.791216	0.000374026	0.00698882	4.26529	4.69112	2.17343	2.22958	1.99567	2.80497	3.58704	2.20413	0.278023	3.8974	5.23117	4.97416	3.48418	6.1822	4.89547	7.57051	7.4016	8.12561	5.9061	6.01492	5.23263	6.16286	7.49475	5.67045	3.93125	5.34865	5.07224	2.37085	1.94941	1.76262	4.82802	5.98737	5.73756	5.36996	6.88875	4.7563	5.49688	6.6812	6.10247	7.10295	6.8144
22q13.31	NM_032287	84247	LDOC1L	leucine zipper, down-regulated in cancer 1-like	0.864948	-0.209314	0.000375545	0.0070041	15.0668	16.158	15.1327	9.62789	13.2696	14.4826	16.0656	7.88321	12.204	19.1933	20.84	21.2258	13.6294	17.0387	13.767	20.8304	21.693	22.3199	14.6923	12.4964	13.5265	16.2338	15.7064	14.1798	15.9084	14.5823	16.1545	14.5938	13.0616	16.77	15.5181	16.8666	15.5895	15.5696	16.7247	14.6195	14.3291	15.919	13.4443	11.0098	11.1274
3p21.1	NM_152932	55830	GLT8D1	glycosyltransferase 8 domain containing 1	1.15129	0.203253	0.000376672	0.007012	4.41607	8.5428	12.8264	15.5718	13.1989	12.1134	6.36255	14.856	20.2993	12.0538	10.6242	8.19343	8.72395	13.2206	15.064	7.93239	5.03018	3.73498	6.01975	8.26424	10.5793	5.93327	6.73344	8.28045	17.2301	13.9337	10.5974	4.51657	3.19152	7.07835	10.227	7.86892	8.48363	14.8881	14.0077	12.3148	9.31283	6.92214	10.6211	6.52083	5.19124
14q32.12	NM_006329	10516	FBLN5	fibulin 5	1.70778	0.772124	0.000379164	0.00704164	4.19137	20.0316	14.0543	7.9731	9.56751	10.1132	8.81684	4.94565	9.61577	3.13287	3.91604	2.15554	4.6708	3.44357	3.77204	5.83205	5.15783	5.2892	5.58502	4.78017	6.36738	8.57312	7.44075	7.94488	7.71639	7.56806	9.65521	3.05245	2.78876	5.10436	6.76297	4.60479	5.15262	8.15447	6.79176	6.49701	3.5374	2.20294	3.61341	2.46887	1.86708
4q21.21	NM_001040202	152559	PAQR3	progestin and adipoQ receptor family member III	0.758488	-0.398802	0.000379771	0.00704164	2.32857	3.37992	4.69438	4.21502	4.09995	5.38933	3.6389	6.58169	7.09197	8.33002	9.72606	9.39346	5.88819	10.398	6.36819	10.8367	10.1239	9.79609	6.61711	6.37852	7.02324	8.10946	9.60842	10.4903	5.35564	4.73586	5.45634	3.70499	2.51756	6.31522	4.92142	5.91497	4.4928	5.3562	6.5417	7.22467	7.22235	6.27896	5.93015	4.91305	3.61512
1p35.1	NM_033504	113452	TMEM54	transmembrane protein 54	1.66546	0.735917	0.000380381	0.00704164	8.5777	13.6626	15.5752	13.0136	7.51666	7.30865	4.12395	3.50955	18.0196	6.72711	6.85206	4.58369	4.59525	3.76919	3.12376	1.25243	0.63465	1.77116	9.71152	8.45842	9.93231	3.75331	3.4259	3.30417	4.92717	5.64146	7.6715	7.01096	6.1561	4.02433	6.35018	5.57317	5.99679	7.94892	5.38357	4.35007	2.33776	3.05359	3.2661	5.26785	2.60012
17q25.1	NR_038111	100507246	SNHG16	small nucleolar RNA host gene 16 (non-protein coding)	1.0621	0.0869254	0.000381287	0.00704533	21.3516	30.9014	57.7817	61.7125	44.8264	40.5364	29.8002	41.2731	41.308	27.7803	33.1914	33.1083	31.3109	35.594	36.2895	20.5438	18.5718	17.5396	33.1845	28.7957	30.9221	26.4714	28.1754	27.348	50.5941	41.2119	43.4517	19.1171	17.8241	49.37	39.3683	38.2623	32.5821	35.25	31.4282	32.36	29.1155	22.0712	26.9111	21.5364	18.099
18p11.32	NM_001071	7298	TYMS	thymidylate synthetase	1.24514	0.316309	0.000386005	0.00711933	3.74079	6.29745	6.81272	8.96365	7.52768	6.54296	3.66895	5.6029	5.18212	4.45812	5.84984	2.90176	7.51487	9.47459	8.52623	2.74304	2.25775	2.24625	6.8459	7.02308	6.8987	4.63982	3.66683	3.62492	4.05118	6.25754	6.18335	1.29144	1.38379	2.17323	4.79679	4.41723	4.30384	6.8804	6.95577	7.50402	3.78012	2.6409	2.87306	2.37931	2.59095
7q21.3	NM_003919	8910	SGCE	sarcoglycan, epsilon	1.24317	0.314023	0.000387768	0.00712521	2.60851	14.3677	9.87869	11.7324	14.3236	10.5291	3.64667	10.8387	12.4263	6.27622	7.95869	4.02818	15.1201	8.41693	9.78935	3.72364	2.61037	2.16339	9.92784	9.39417	10.0768	4.35122	4.25916	4.64318	10.978	10.138	9.59972	3.73277	1.95599	6.16948	6.82473	8.15597	3.83223	9.41615	7.24121	9.37937	9.24213	6.61257	7.79084	5.27067	5.85138
14q32.33	NM_006427	10572	SIVA1	SIVA1, apoptosis-inducing factor	1.14962	0.201161	0.000387786	0.00712521	54.5571	83.154	39.3575	65.0347	39.3658	31.1596	51.1052	61.954	34.4516	40.096	42.4996	38.4021	24.0296	40.848	35.9454	15.3485	12.5449	15.5649	26.2429	23.4571	28.4877	21.9706	32.6331	16.2076	32.5748	44.5509	52.3197	36.5207	31.8038	13.7937	31.622	32.4066	35.2145	48.381	40.0805	27.3854	27.985	21.9872	28.1951	43.2901	50.2764
9q33.2	NM_004099	2040	STOM	stomatin	1.70834	0.772591	0.000388466	0.00712521	3.05575	4.62077	32.7475	31.3648	16.9231	16.8975	3.91529	7.32425	45.4205	7.46895	8.99345	7.36134	8.32465	4.23339	7.2531	3.15712	3.0081	3.23714	15.1861	15.0054	16.3122	3.72766	3.41781	4.40186	11.5402	7.80589	8.83943	1.95561	2.54208	5.82252	7.61611	7.43271	5.91617	6.88835	6.24736	6.8838	6.02594	3.67279	4.3403	2.81963	1.93281
20q13.32	NM_016045	51012	SLMO2	slowmo homolog 2 (Drosophila)	0.643518	-0.635948	0.000390422	0.00714794	1.54978	3.24392	4.16955	5.18168	3.09369	8.52485	3.07835	9.48956	4.60736	11.5605	12.9497	11.6237	12.5555	11.4653	9.92708	8.27173	7.53656	6.75808	7.13517	9.31459	7.3788	5.53994	7.87778	7.50436	8.90979	6.92179	8.69027	2.70808	3.35911	9.82097	6.97119	8.41135	7.95258	9.5249	7.02072	10.5769	9.47385	6.14885	9.93721	5.52311	4.59558
19p13.13	NM_001930	1725	DHPS	deoxyhypusine synthase	0.885801	-0.174946	0.000391908	0.00715749	31.9292	19.4056	23.6238	19.0975	24.2782	22.6493	36.6601	36.2771	20.662	32.9845	35.0674	35.1107	23.1966	22.5216	18.3805	35.6425	35.9327	34.1127	35.6526	28.474	29.6626	28.1495	25.7753	28.7954	23.1963	27.8366	30.3975	34.9888	33.4538	21.9942	30.2936	32.8047	31.9572	25.5361	26.8945	23.1737	32.2033	31.2455	28.9877	31.3907	27.5291
19q13.11	NM_014717	9745	ZNF536	zinc finger protein 536	0.71747	-0.47901	0.000392378	0.00715749	7.67049	4.86557	2.77048	2.5318	2.80503	3.3145	9.5144	3.94581	0.754687	4.06478	4.99869	5.55147	5.03899	9.41073	4.12456	8.58203	7.76202	8.48545	6.08693	5.84841	5.52825	7.51021	7.75015	6.94229	3.68399	4.51492	4.98357	7.10766	6.4433	6.17586	4.63595	5.12282	4.54185	4.80309	5.52304	4.99176	5.21697	5.17049	4.40306	6.04526	6.58344
20q13.33	NM_020062	56731	SLC2A4RG	SLC2A4 regulator	1.2606	0.334108	0.000393906	0.00716516	14.642	23.3146	22.2527	21.3166	17.4676	15.306	13.5402	7.83842	16.127	12.8831	11.3889	10.3945	9.72242	9.19659	7.55953	6.74712	6.51856	7.98296	9.68031	8.15835	10.8365	11.071	10.8822	8.91119	13.6514	17.3675	18.1047	15.5502	15.9719	8.35887	13.8858	12.2327	13.7265	17.3819	13.8926	10.0198	8.54099	6.46589	6.37231	10.1125	10.5169
11q23.2	NM_004724	9183	ZW10	zw10 kinetochore protein	1.26811	0.342682	0.000394235	0.00716516	2.11008	4.08594	5.989	6.54341	6.5979	6.6672	4.54978	8.2898	8.81761	5.98151	5.14457	4.23303	7.4638	6.99099	8.67771	4.08482	3.51775	4.00371	4.55736	4.76949	4.69547	2.99202	2.38611	3.76586	6.52337	5.66267	5.43219	1.10659	1.3127	2.3099	4.87336	4.48462	4.32098	5.57261	5.16824	5.88906	4.48991	3.35755	3.54827	1.99583	2.60323
15q15.1	NM_024111	79094	CHAC1	ChaC, cation transport regulator homolog 1 (E. coli)	1.28355	0.360137	0.000398193	0.00722395	9.6057	33.4862	10.994	11.3953	15.8969	14.2887	13.2164	10.187	10.3704	5.29058	7.66617	8.36751	5.88479	8.9794	6.93784	9.79483	8.96214	9.84408	8.09353	5.44836	7.99306	7.68985	7.4539	5.77778	10.7401	15.771	15.6595	6.46948	6.03193	3.35399	10.9452	10.54	10.7005	14.2707	10.9402	9.52131	7.49208	5.81768	6.32695	7.15827	6.40473
19q13.33	NM_015710	29997	GLTSCR2	glioma tumor suppressor candidate region gene 2	1.11578	0.158046	0.000400317	0.00722427	147.746	136.104	113.719	113.07	112.528	78.2099	83.3405	35.2083	79.9005	59.4121	59.5431	51.5683	29.7676	66.2274	48.5902	39.1092	33.6079	37.4777	63.3104	46.5963	58.262	45.1586	69.4095	42.0447	70.0485	81.4784	92.2814	58.5484	65.5452	28.0993	85.7184	82.1415	84.3307	82.9403	76.5812	59.8967	40.2314	28.7598	27.5128	55.6232	51.761
20p11.21	NM_022080	63908	NAPB	N-ethylmaleimide-sensitive factor attachment protein, beta	0.631649	-0.662806	0.000400383	0.00722427	2.59438	3.41182	1.61492	1.80906	3.03717	3.65867	7.52852	8.53241	2.65614	8.01299	7.47971	6.88323	5.66148	7.05431	3.23113	22.9404	23.9752	20.8332	4.64946	5.05268	3.98939	4.9297	5.92142	8.89881	7.39058	5.88509	6.90725	2.51444	2.41516	3.86911	4.81218	4.89482	5.06762	4.37845	6.38474	8.78054	7.11616	8.68068	8.03928	3.24023	3.7633
10p13	NR_108061	100507347	VIM-AS1	VIM antisense RNA 1	1.12369	0.168243	0.000399843	0.00722427	278.441	244.452	194.164	178.971	234.054	181.127	301.364	183.085	126.117	69.9028	78.4207	67.3874	120.093	125.905	105.934	104.386	87.6918	121.518	67.829	55.798	68.1527	169.068	175.07	158.728	130.266	134.395	155.66	93.7276	96.6783	78.7662	131.002	123.569	120.968	117.894	113.351	87.6493	87.1835	60.2577	68.7653	96.2538	96.8139
17p13.1	NM_001185022	1366	CLDN7	claudin 7	2.15673	1.10884	0.000402441	0.00724829	0.641035	1.56189	14.147	17.3543	7.03614	7.92493	0.235817	0.325357	36.927	2.56254	4.09416	2.17417	2.84502	2.93439	1.95893	0.033842	0.052422	0	1.50461	1.42067	1.51866	1.09234	0.787335	0.405448	2.71619	4.08945	3.52961	1.02831	1.17971	1.17077	2.21098	1.63397	2.17138	4.90327	1.94546	2.65293	1.57952	0.28906	0.819714	1.15162	1.38399
7p13	NM_001077664	55665	URGCP	upregulator of cell proliferation	0.747735	-0.419402	0.00040425	0.00726776	5.97588	3.70091	3.38463	2.78259	3.19088	4.09721	5.19472	2.1099	2.80685	6.90529	9.02993	9.83718	2.70941	5.67166	3.71088	7.59167	7.45546	8.55558	5.51503	3.18175	4.87277	4.85589	4.88268	3.97676	5.8534	5.46974	5.41853	5.75806	6.78706	4.50673	5.25596	4.58044	5.27107	6.15288	4.82224	3.89842	6.20394	7.14343	6.37425	4.99352	4.63664
2p25.1	NM_138799	129642	MBOAT2	membrane bound O-acyltransferase domain containing 2	0.831628	-0.265989	0.000405575	0.00727847	6.24608	7.24652	5.76987	6.56525	7.32098	10.4511	6.90378	10.3735	12.4769	9.47755	9.81111	8.21613	10.1465	8.85559	10.038	17.4912	14.8947	15.1809	9.09485	10.3797	9.2393	8.13971	8.03779	11.1887	10.8781	9.03467	8.84909	6.19695	6.17205	8.69415	9.73539	10.2613	9.6385	10.5212	10.8533	12.063	16.9859	14.046	18.1664	7.76002	8.56889
12q24.31	NM_001278379	51329	ARL6IP4	ADP-ribosylation-like factor 6 interacting protein 4	1.17351	0.230825	0.000409353	0.00733307	38.768	43.4218	45.3702	40.8332	39.4626	31.4043	28.5419	22.9356	31.7967	25.9563	24.2885	17.3014	18.4919	31.7582	18.794	13.266	12.2304	11.2722	25.6567	21.6985	24.4879	16.2559	20.8077	17.8412	29.9572	33.3408	33.9021	39.3599	38.0274	14.0867	25.9794	28.3074	19.7579	42.6622	33.7782	20.5568	22.5922	19.8662	17.2535	28.7936	26.8478
15q23	NM_000520	3073	HEXA	hexosaminidase A (alpha polypeptide)	1.22823	0.296576	0.000410259	0.00733613	26.1751	21.1703	31.0219	24.0796	31.4469	26.2792	20.0276	15.8199	43.3018	14.7115	13.9091	12.6267	15.556	20.4308	16.9733	10.6155	11.3203	10.0637	15.9841	14.0621	15.8089	16.612	14.4139	11.7446	24.5747	26.2817	23.4254	27.2419	25.1866	18.3008	20.4199	20.9887	15.8944	25.903	18.3614	12.7306	17.0505	15.1929	14.1082	12.1232	11.44
9p13.3	NM_001216	768	CA9	carbonic anhydrase IX	2.4802	1.31046	0.000412412	0.00736144	1.90931	8.81872	0.426395	0.353033	5.61302	4.06132	8.92428	4.51129	0.052903	3.06914	2.55388	2.87113	0.54798	0.696675	0.861403	2.02243	1.19975	1.55218	0.198255	0.09645	0.124281	0.207732	0.356473	0.252288	0.902389	0.840557	1.45672	1.17705	0.605369	0.739494	0.607633	0.535008	0.40765	0.616949	0.453197	0.25032	0.72349	0.987243	0.928681	0.631434	0.802828
5q23.3	NM_001999	2201	FBN2	fibrillin 2	1.23404	0.303391	0.000414309	0.0073821	5.77391	35.6529	8.25277	4.79064	11.6838	16.865	5.09398	3.8844	7.03389	3.40951	5.70367	2.59231	17.3413	10.8163	19.7435	1.01533	1.07352	0.968164	7.18097	7.66544	4.97359	7.38763	3.33336	5.94399	14.5088	13.8951	13.5022	3.08236	3.92645	7.38616	7.4939	7.65839	7.19479	23.2852	11.1356	9.91541	6.59833	4.07254	5.5077	5.74552	5.22384
11p15.4	NM_015012	440026	TMEM41B	transmembrane protein 41B	0.755192	-0.405085	0.000415786	0.00739521	4.41016	8.94986	8.15124	6.86117	5.76763	7.90022	2.7305	4.5122	11.4097	11.3989	10.5559	11.6981	8.47521	11.6752	7.22179	7.85938	8.3014	7.46429	8.41997	8.67741	9.49726	8.07959	9.54121	8.83306	9.05985	8.37144	8.47798	11.4045	7.13239	13.6078	11.2616	12.7383	10.4818	9.73254	9.36099	10.2984	11.5073	10.8041	11.3865	10.6413	10.6109
16p13.11	NM_033201	89927	C16orf45	chromosome 16 open reading frame 45	0.715561	-0.482853	0.000418422	0.00741566	25.2958	17.7779	11.1507	8.58716	13.0928	14.2611	26.579	22.8686	2.95178	23.3347	24.774	29.2045	12.9221	24.233	17.1154	45.9627	43.1412	44.5677	35.1837	27.0561	30.0321	27.4936	31.3303	26.4464	14.2466	15.9629	16.8387	28.3979	29.5236	14.0575	16.9737	20.7868	17.7619	15.1947	19.065	15.7485	19.5563	21.2015	20.6457	18.3994	17.158
11q13.5	NM_001235	871	SERPINH1	serpin peptidase inhibitor, clade H (heat shock protein 47), member 1, (collagen binding protein 1)	1.11295	0.154392	0.000418095	0.00741566	184.231	651.652	308.593	236.983	357.791	335.869	113.756	54.0171	226.093	131.053	142.17	95.8099	242.158	104.208	113.386	24.7843	21.965	23.7162	175.192	146.004	187.249	102.487	81.3654	95.6303	232.864	280.902	281.013	177.82	180.765	114.473	214.463	173.723	177.242	286.898	192.706	152.49	152.751	106.025	121.122	138.619	121.986
12q13.3	NM_001276469	2583	B4GALNT1	beta-1,4-N-acetyl-galactosaminyl transferase 1	0.760867	-0.394283	0.000421809	0.00746242	2.53936	1.20084	0.29007	0.148654	1.25395	1.45989	3.18208	2.43339	0.305184	3.15201	2.00251	3.66896	1.36814	1.94056	0.645758	6.26022	7.06297	6.82798	1.11285	0.907196	0.869987	3.71686	3.32932	2.97774	1.3182	1.69139	1.92336	3.17631	2.97862	1.48835	1.79507	1.5361	1.44173	1.03633	1.69543	1.67138	1.96375	3.73532	2.52766	2.53846	2.69151
15q25.2	NM_004644	8120	AP3B2	adaptor-related protein complex 3, beta 2 subunit	0.675723	-0.565496	0.000424188	0.00749124	3.49134	1.52225	1.15569	0.667346	1.26144	2.29528	6.20457	2.85891	0.618146	2.17913	2.59506	2.71242	2.53709	3.43472	1.27527	8.5032	9.53774	8.86536	1.9389	2.14403	1.77991	6.02139	3.95276	4.69823	2.38632	3.19335	4.01978	5.18761	5.10415	2.30724	2.90479	3.88863	3.5281	3.29584	3.25869	2.8959	3.94831	4.82538	4.10352	2.72218	3.16027
1p13.2	NM_018364	54665	RSBN1	round spermatid basic protein 1	0.754606	-0.406205	0.000426918	0.00752613	2.56913	4.72759	4.45065	3.60615	4.19598	6.57863	3.56667	6.29264	3.47437	6.09196	6.52553	6.41639	6.95419	10.141	8.05597	10.027	9.08205	8.14055	6.36349	6.60801	6.87944	5.41266	6.58507	8.49197	6.65079	5.68369	6.03234	3.08186	2.46276	7.03588	5.53576	5.5787	5.83997	5.47565	7.15107	7.84637	6.66773	5.40685	6.3998	4.11903	4.17972
19q13.1	NM_002503	4793	NFKBIB	nuclear factor of kappa light polypeptide gene enhancer in B-cells inhibitor, beta	1.82494	0.867847	0.000429438	0.0075572	3.58451	4.92271	4.87459	4.76684	3.41403	2.67835	4.64058	1.83597	6.42051	2.70451	2.55915	2.03976	1.35838	2.3537	1.7458	1.204	1.34192	2.09522	3.06742	2.37568	3.49274	1.99961	2.85261	1.09631	2.15882	2.88633	2.56728	2.58242	2.23116	1.57864	2.90433	2.3989	1.99368	2.75967	1.32226	1.27456	1.32343	1.4003	1.67974	2.16168	1.75412
2p23.3	NM_016085	51374	ATRAID	all-trans retinoic acid-induced differentiation factor	1.30386	0.382789	0.000431006	0.00757144	22.9501	22.5129	18.5944	19.7999	16.4291	12.6095	10.4135	12.9161	21.4134	15.0017	8.70636	7.55253	11.6606	12.6396	9.19387	4.76075	4.44332	4.89176	14.345	9.18548	15.0698	7.41088	10.9165	5.11428	12.8086	14.7684	18.5366	12.3924	13.6084	6.27904	11.7353	10.6267	11.5869	17.9813	12.4401	11.7672	11.1298	8.1186	9.94859	9.30427	14.5292
22q12.2	NM_152511	150290	DUSP18	dual specificity phosphatase 18	0.789439	-0.341101	0.000433416	0.00758705	3.05435	2.8996	1.21946	1.03887	1.45769	2.00529	1.9403	1.12559	1.05972	1.41583	1.78072	2.15893	1.85367	2.06872	2.14461	3.2304	3.42417	4.01025	1.4457	1.85533	1.68557	3.56196	2.98196	2.07167	2.48588	2.42356	2.33352	5.95427	5.06358	4.66263	2.56179	3.11006	2.61374	2.65295	2.97252	1.76681	3.66804	4.29073	2.97451	2.21847	2.47341
22q13.33	NM_033200	91289	LMF2	lipase maturation factor 2	1.25141	0.323558	0.000433039	0.00758705	16.7121	25.276	20.7727	13.9954	15.2097	11.5195	18.1983	8.69516	23.3942	9.83209	10.7529	8.24815	11.8848	10.9902	11.0868	7.36968	6.61839	7.3186	9.06068	7.69259	10.0037	11.3289	6.83071	8.15173	13.0548	15.3716	17.225	16.1209	11.974	5.88852	16.7556	13.6145	16.4495	16.0485	13.9743	10.7691	11.6704	9.32507	8.02659	12.4604	13.116
4q12	NM_006206	5156	PDGFRA	platelet-derived growth factor receptor, alpha polypeptide	1.36282	0.446594	0.000434717	0.00759651	4.05073	14.348	7.83138	5.97674	13.8104	17.2672	4.44548	5.10498	13.0217	4.56812	5.26364	2.20445	11.5228	8.30799	16.8265	1.25456	1.01439	1.17295	8.97618	9.9693	8.51698	3.58601	1.66811	3.94294	14.2928	9.252	11.9602	3.52086	3.56786	9.76699	8.10337	7.55979	8.17661	17.2381	10.7255	12.1423	6.17305	6.18933	8.15384	2.48932	2.66769
1p32.3	NM_017887	54987	C1orf123	chromosome 1 open reading frame 123	1.11375	0.155432	0.000435976	0.00760518	14.4798	17.0399	24.8574	23.2127	18.4794	18.4182	17.0397	30.4129	16.6343	17.4775	21.2509	16.5911	16.2661	21.7509	18.5261	15.5635	14.8246	12.9865	13.841	13.1579	13.206	15.353	16.2531	12.1079	17.6368	15.3748	16.1476	9.8718	11.0266	13.0449	15.4943	18.0685	14.4342	17.3381	15.9321	15.2397	15.9205	14.1044	14.7285	11.7715	9.95181
17q11.2	NR_015341	147172	LRRC37BP1	leucine rich repeat containing 37B pseudogene 1	0.855565	-0.22505	0.000439044	0.00764372	1.55469	4.39073	2.11333	2.38156	2.2323	3.10489	2.73525	2.40133	2.85668	3.89201	3.99924	3.48048	3.51325	3.9556	3.5671	3.51312	3.47983	3.4263	3.27539	3.58824	3.08746	3.58587	2.8338	3.16247	3.79061	3.00468	3.07672	2.48557	1.99396	2.74275	3.31316	3.88133	3.30845	3.38898	3.59511	3.93561	3.17123	3.46545	3.387	2.33165	2.48792
13q32.1	NM_020121	55757	UGGT2	UDP-glucose glycoprotein glucosyltransferase 2	1.16879	0.225021	0.000439717	0.00764372	2.52578	8.46748	6.11619	5.44072	6.1707	7.93306	3.36224	6.84331	8.85176	4.22464	3.9952	3.08508	6.16399	6.24575	6.41234	4.63668	4.20857	4.42335	4.82066	5.19887	5.25724	4.16679	3.9908	5.4624	6.51258	6.05198	5.75661	2.78057	2.55399	4.25294	5.86221	5.46379	5.27466	6.70785	5.55948	6.58099	4.98353	3.81346	4.84516	3.36112	3.04659
1p13.3	NM_020703	57463	AMIGO1	adhesion molecule with Ig-like domain 1	0.938468	-0.0916211	0.000443598	0.00767791	2.81841	2.15771	1.50753	1.36847	1.55764	2.01695	2.88783	2.18507	1.01958	1.37288	1.56298	1.70269	2.09858	2.57195	2.07328	4.16112	4.2064	5.72383	2.92862	2.57721	3.29491	2.88252	2.58219	2.96913	2.76061	2.15151	2.16908	3.72084	3.22765	3.45579	1.59402	1.88833	1.63791	2.08865	2.82778	2.23668	2.73691	2.51775	2.33159	1.76099	1.59808
17p11.2	NM_015134	23164	MPRIP	myosin phosphatase Rho interacting protein	0.737078	-0.44011	0.000442675	0.00767791	8.94212	9.209	5.39137	4.18586	4.4269	4.68435	8.67375	3.80873	3.51039	6.62379	7.23965	8.52364	3.843	8.08383	4.72795	13.5676	15.4711	17.0214	10.9735	8.93245	7.57775	11.9847	10.3743	9.89095	5.97461	6.45466	6.02381	10.2384	8.6789	6.16587	8.52303	9.73546	10.9316	5.36163	8.07911	8.9262	9.21163	12.9242	9.37806	5.16665	5.78468
12q24.23	NM_001002	6175	RPLP0	ribosomal protein, large, P0	1.08062	0.111862	0.000443992	0.00767791	1966.72	2760.9	1802.12	2151.13	1813.5	1284.68	1728.99	1845.29	1187.8	1639.06	1614.26	1537.31	1291.1	1410.95	1311.98	628.534	575.414	596.602	1133	949.494	1032.84	927.612	1385.7	996.462	1343.4	1622.81	1783.61	1276.49	1442.62	661.105	1523.01	1440.85	1512.57	1735.82	1657.62	1369.1	919.652	752.864	821.896	1368.59	1400.11
15q14	NM_003246	7057	THBS1	thrombospondin 1	1.70586	0.770497	0.000445467	0.00768777	11.7175	112.265	23.4144	9.69371	15.605	16.2533	9.04003	7.90763	58.9552	12.1386	16.2979	13.324	9.11665	9.90127	12.1453	2.14411	2.43634	2.70752	8.82862	8.82272	8.58808	9.90972	7.8995	8.5772	11.6885	11.7348	10.4102	10.5175	9.9799	20.8939	10.5753	8.62262	8.29692	14.3568	9.69448	8.35645	5.80043	3.5211	3.74695	3.70437	3.68406
9q33.1	NM_002160	3371	TNC	tenascin C	1.77511	0.827907	0.000446874	0.00768777	3.89977	27.0136	13.5139	4.23097	15.507	17.6688	6.55337	3.12857	18.8558	3.98324	6.21403	3.65057	4.8741	4.77956	5.10286	7.72331	6.7656	7.1165	1.93019	1.95879	1.88413	11.6493	6.72971	8.43376	6.6746	8.08825	6.68227	1.5401	2.31532	3.08937	4.90533	4.25156	4.00269	8.48749	6.00145	4.00129	2.54532	2.36098	2.69416	2.20623	2.07477
4p14	NM_003359	7358	UGDH	UDP-glucose 6-dehydrogenase	1.16016	0.214318	0.000446563	0.00768777	4.96084	21.614	17.9259	17.4038	17.3933	18.0084	4.78565	7.31875	20.3504	13.7721	13.5726	9.37232	17.0723	14.9926	15.0441	5.70523	5.76369	4.74715	10.3712	11.6904	11.6273	4.82901	5.14327	6.32023	16.6356	13.2881	14.0809	4.64964	3.43484	10.5447	12.1329	11.2988	11.3005	13.8851	10.0598	13.9636	8.82943	6.60251	8.56665	6.669	6.67623
4q32.1	NM_001039580	79884	MAP9	microtubule-associated protein 9	0.699616	-0.515365	0.000448527	0.00770294	2.17777	5.11071	2.02544	1.46277	2.98295	4.45951	3.54159	6.78627	4.42364	5.59888	4.45978	3.95209	5.59299	5.61721	8.29575	5.85752	5.68275	5.73249	3.25372	3.98403	4.00958	4.05581	3.82564	5.6871	7.02772	6.10006	6.68149	4.56818	3.41719	5.6383	6.24192	6.95412	6.47806	5.93493	6.78827	7.80943	7.98197	7.91663	8.72176	3.65758	4.44557
6q24.1	NM_014320	23593	HEBP2	heme binding protein 2	1.2265	0.29455	0.00045121	0.0077357	10.1135	14.5091	24.7173	22.8238	23.4327	17.7583	9.49573	13.1175	30.8231	11.7993	13.2996	11.1046	19.8569	16.3906	15.57	6.07403	4.86579	5.47872	13.9206	13.7075	15.9664	7.32901	7.0831	6.42357	16.6538	16.0979	14.4168	12.371	8.2388	9.36192	16.7956	14.1811	12.7811	14.7453	9.62847	8.64123	14.9744	11.3269	13.7764	17.9944	13.7147
4p16.1	NM_053044	94031	HTRA3	HtrA serine peptidase 3	1.71633	0.779324	0.000455984	0.00779076	4.12265	7.88511	11.1815	9.06852	6.39024	4.07854	2.66304	0.903192	9.41017	2.4661	2.42958	2.33174	5.02417	3.48061	3.91187	0.057612	0.141131	0.103263	5.62835	5.5015	6.67468	1.44036	0.968373	1.04395	4.76707	5.40352	6.5295	2.46372	2.0701	1.16803	6.58192	7.07541	6.07923	6.717	6.02891	3.92967	3.14431	0.791596	1.23175	3.65349	2.37632
16q21	NM_001242836	65009	NDRG4	NDRG family member 4	0.691286	-0.532646	0.000455961	0.00779076	23.3507	9.50446	5.9604	7.86353	13.6876	14.4855	38.4426	17.5549	4.30427	18.5319	20.1716	21.9666	12.1119	27.7875	12.5161	64.4601	67.9619	65.6628	18.2456	14.4997	15.6711	36.9079	41.9906	38.9316	15.363	16.3858	20.6536	18.7117	18.3213	11.65	18.6787	18.8209	18.0977	16.9062	22.5553	17.203	21.6548	22.1397	19.7183	19.7949	20.5117
17p13.2	NM_014604	30851	TAX1BP3	Tax1 (human T-cell leukemia virus type I) binding protein 3	1.22161	0.288782	0.000458466	0.00781979	39.4097	36.7415	45.297	48.5666	30.2176	25.8182	30.5042	24.683	49.4672	24.0238	20.9368	18.4114	21.0926	20.7227	23.4186	9.71285	8.08779	7.68637	25.6077	23.6244	30.7621	18.0341	21.1361	14.5362	21.64	26.4896	26.448	34.6753	34.907	21.0688	29.9264	26.8538	29.7828	33.1591	24.3217	19.569	19.2923	13.3682	13.9541	24.3528	23.9236
1p35.2	NM_178865	347735	SERINC2	serine incorporator 2	1.67037	0.740166	0.000459567	0.00782519	14.4653	18.2325	13.472	10.2476	9.1765	6.93807	15.0761	4.02096	25.3108	7.21342	7.02788	6.44398	4.90213	5.16953	5.60357	3.46849	2.90042	2.72597	4.50943	1.88271	3.43634	6.20413	6.94709	6.36083	4.96462	4.08563	7.15723	12.1423	9.98644	5.18775	7.73396	9.50386	8.34668	7.23139	6.58967	6.48392	4.26574	5.21159	5.07525	2.60204	3.61317
15q11.2	NR_003318_dup1	100033415	SNORD116-3	small nucleolar RNA, C/D box 116-3	0.806913	-0.309514	0.00046107	0.0078374	1429.67	909.867	444.315	885.764	755.325	851.412	1104.9	1973.45	607.334	1847.28	1361.35	2071.49	356.736	1051.55	790.516	3907.5	2953.44	3346.01	2459.51	3002.61	2407.92	1702.51	928.749	1558.48	2503.15	2190.49	1558.23	1146.33	1719.31	1127.79	2004.02	2395.24	3174	1068.12	1818.58	2680.13	1572.23	1797.67	1270.41	1155.9	1307.93
18q11.2	NM_020774	57534	MIB1	mindbomb E3 ubiquitin protein ligase 1	0.76131	-0.393444	0.000462244	0.007844	5.87365	12.3985	9.22283	7.79814	9.53653	15.2364	9.10728	16.2215	16.3225	15.1897	17.0651	13.7544	20.7651	26.8331	24.2257	16.3501	17.4483	16.4968	18.6749	20.3941	17.1242	15.4715	13.4518	19.5818	17.7086	15.121	15.9169	7.52308	7.74803	13.147	15.4257	18.6084	16.4347	17.4565	17.0966	24.1124	17.1603	16.4738	16.5728	8.95148	9.55406
9q34.3	NM_001282612	10439	OLFM1	olfactomedin 1	0.582749	-0.779054	0.000464277	0.00786512	13.4113	10.7834	6.50143	4.00865	9.92451	14.5399	15.9631	17.4538	0.826604	22.2076	23.124	28.0288	18.9086	22.5807	13.0597	52.3522	52.3067	44.4742	17.7555	14.0774	12.6346	19.7634	21.7272	22.6162	18.2008	15.5571	13.3183	9.13415	7.35293	17.8864	13.3625	13.5872	12.5992	25.8101	29.9833	26.3493	24.2258	29.4112	31.3955	15.6815	13.831
1q21.3	NM_006818	10962	MLLT11	myeloid/lymphoid or mixed-lineage leukemia (trithorax homolog, Drosophila); translocated to, 11	0.84436	-0.24407	0.000465713	0.00787608	70.6333	37.9693	32.8577	43.9342	34.5345	44.4376	88.0417	155.433	24.5165	71.7121	65.3326	74.6971	45.8881	79.6553	46.0322	146.896	141.621	130.245	59.8217	47.1102	53.9178	72.1871	124.891	88.8097	49.677	50.7855	58.0632	48.7688	49.8635	37.5571	66.3139	71.0015	62.8943	46.6019	73.5213	74.6247	45.1194	57.273	50.9886	95.1665	92.8442
16q13	NM_014685	9709	HERPUD1	homocysteine-inducible, endoplasmic reticulum stress-inducible, ubiquitin-like domain member 1	1.08686	0.120163	0.000468451	0.00790898	10.5441	29.4559	30.7585	31.3229	35.5844	32.1372	20.8782	32.1289	32.889	18.5074	20.7871	21.9614	28.7254	35.2556	33.7519	18.0698	19.9819	18.0843	23.2674	22.6875	25.7757	14.262	15.4414	16.1039	28.4068	23.2507	25.0104	6.59103	7.9446	13.7034	25.9188	27.3392	24.518	29.1274	19.3626	30.1281	22.944	22.3071	22.1446	12.796	11.8594
10q25.3	NM_025015	259217	HSPA12A	heat shock 70kDa protein 12A	0.803285	-0.316017	0.000471512	0.00794721	2.59375	2.37221	1.75955	2.30699	1.88758	2.55111	3.66419	2.78237	0.581696	1.73823	1.91981	1.8013	3.45446	3.14546	3.65315	10.2372	10.8605	10.0077	4.85306	4.51359	4.27923	3.19779	2.66162	3.46015	2.58962	2.45761	2.64958	2.91528	2.49382	4.41046	2.36988	2.28479	2.56146	3.10135	3.40165	2.89074	4.64862	5.1419	5.78115	1.88091	1.8289
18p11.21	NM_080422	5771	PTPN2	protein tyrosine phosphatase, non-receptor type 2	1.33083	0.412327	0.000473402	0.0079522	2.76457	4.92459	8.04343	8.55185	8.54233	8.21974	3.39411	8.09602	9.36839	4.40041	3.55156	2.51421	9.61796	5.06761	7.82499	3.62946	2.84986	3.6346	5.67829	6.74279	6.63652	2.18467	1.88216	3.74839	7.10973	5.98994	5.85797	2.05279	2.11092	2.11061	5.39603	4.86632	4.81488	6.34148	5.86003	7.14423	4.09892	3.57825	4.89199	3.8566	3.29503
6q21	NM_001024936	8936	WASF1	WAS protein family, member 1	0.711476	-0.491113	0.000472781	0.0079522	3.55185	5.67702	5.08471	4.24362	4.38291	6.56459	4.22105	7.61053	4.34888	4.03766	6.7736	6.99726	9.00125	11.1065	8.27862	14.5196	18.3949	17.0459	4.3596	4.57461	4.77204	7.32955	9.60863	10.4206	6.78744	6.66507	7.24143	3.90019	4.0257	7.3385	8.76459	8.15823	7.40224	10.4881	10.6694	12.1911	10.305	7.76095	11.2341	6.97304	6.74732
10p11.22	NM_002211	3688	ITGB1	integrin, beta 1 (fibronectin receptor, beta polypeptide, antigen CD29 includes MDF2, MSK12)	1.34199	0.424372	0.000475223	0.00795316	11.4072	31.6492	40.6182	32.9372	54.9625	64.7121	20.652	31.3073	119.173	20.9523	23.9003	10.5558	69.8283	19.8221	39.8258	6.6578	12.3069	9.65672	40.0684	42.1855	45.917	13.0132	3.69279	9.22589	47.0147	39.6465	34.0116	8.53423	5.82989	9.15862	22.3627	23.4381	26.7307	33.605	19.9714	30.5231	10.5565	8.12646	8.099	11.938	9.37821
6p22.3	NM_153042	221656	KDM1B	lysine (K)-specific demethylase 1B	0.81052	-0.303081	0.000475851	0.00795316	1.56466	3.46876	1.53236	1.17291	2.26962	3.71605	2.75675	3.01932	4.45563	3.59543	3.49436	3.1587	5.70169	3.4007	4.55852	5.46445	5.50386	5.53276	2.89931	3.06037	2.99498	2.82253	2.77875	3.03194	3.64093	3.13064	3.38555	1.99673	1.7054	4.26397	3.58931	3.837	2.71573	3.45188	3.53922	4.5713	3.91396	3.88556	4.15177	2.17485	2.50563
1q21.3	NM_212551	388695	LYSMD1	LysM, putative peptidoglycan-binding, domain containing 1	0.860681	-0.216449	0.000474365	0.00795316	5.21434	4.82182	4.99161	2.27011	4.64339	5.4034	5.6148	5.58188	5.26595	5.43276	6.40787	7.2404	5.52964	6.34647	5.23324	9.73368	9.67792	8.49489	6.68523	5.15804	7.21023	6.90297	7.66109	5.98277	5.97225	5.03152	4.46438	4.97137	5.28514	6.58143	5.39524	6.14604	5.14664	5.02416	4.74461	4.4947	5.7704	6.65543	7.32514	4.62808	6.79842
9p13.3	NM_020944	57704	GBA2	glucosidase, beta (bile acid) 2	0.827664	-0.272882	0.000477002	0.00795679	14.2055	12.6245	10.9198	8.4683	8.74577	8.85831	10.4824	5.98087	8.31484	7.91187	7.98605	7.64672	10.0835	10.7255	9.30536	14.2246	14.781	15.7878	16.2063	13.8921	14.5848	12.1872	10.8655	9.4003	10.943	11.7206	13.0141	23.1304	19.8264	14.3306	12.2268	12.8395	12.992	12.3263	12.3051	7.89739	16.0041	17.9885	16.2942	13.2587	14.6707
14q24.3	NM_014909	22846	VASH1	vasohibin 1	0.757201	-0.401252	0.000477663	0.00795679	9.74706	9.03074	5.00211	3.52431	3.57735	5.09257	8.02564	3.34315	3.00625	6.90246	7.49029	7.7559	5.36856	9.79849	7.84392	8.59402	8.39563	9.65013	8.30292	7.20398	7.54951	7.47142	5.92357	6.02753	6.8184	7.48315	9.64885	9.37179	8.4205	5.36359	9.39705	10.5706	10.1053	6.01225	7.39316	6.34767	5.87309	6.63708	5.08256	5.79834	6.57204
2q11.2	NM_001164315	375248	ANKRD36	ankyrin repeat domain 36	0.693978	-0.527039	0.000484573	0.00805846	2.49373	3.36273	1.81942	1.71375	3.17975	5.57319	5.54023	9.16575	2.05741	6.60492	5.80872	5.13684	7.66903	5.92059	6.25065	9.90631	9.58465	10.0107	5.58326	6.10629	5.05376	9.90451	4.86626	9.14862	4.5747	4.42285	4.38306	2.88578	3.36227	3.34326	4.56828	5.49125	5.32008	4.64361	5.74447	6.14528	5.22543	6.73897	5.84964	3.00321	3.48798
3p11.1	NM_003663	8545	CGGBP1	CGG triplet repeat binding protein 1	0.789581	-0.340841	0.000487606	0.00808195	5.22064	14.5775	10.8064	8.52773	9.84671	14.4557	7.2222	11.5433	12.8038	13.1833	14.7418	13.0667	15.9535	16.1859	16.335	21.1697	21.2431	16.4961	14.3752	15.2761	17.1232	13.1377	14.3662	16.7951	16.3644	13.6381	14.1617	7.44073	5.62916	16.277	14.2639	12.8655	12.0228	14.9138	16.5109	19.7448	15.0597	14.6247	15.8976	10.0341	8.55823
17q21.1	NM_016339	51195	RAPGEFL1	Rap guanine nucleotide exchange factor (GEF)-like 1	0.790781	-0.33865	0.000486947	0.00808195	2.47482	1.90824	2.13886	1.16446	1.29997	1.21932	2.55891	0.534597	1.25129	3.04117	3.53664	3.41437	1.61822	2.14748	1.60624	2.51565	2.77495	3.13401	2.13312	2.35921	2.82037	2.925	1.48185	1.77619	1.99134	2.33003	2.70502	4.39837	2.96019	2.45606	2.90142	2.82131	3.43045	2.0385	2.87777	1.93958	2.2457	2.94993	2.39247	1.46554	1.61006
2q32.1	NM_018981	54431	DNAJC10	DnaJ (Hsp40) homolog, subfamily C, member 10	1.20723	0.271698	0.000488947	0.00808246	1.99619	14.4356	8.81574	8.76667	11.7112	14.6775	5.48797	9.43781	15.4716	7.83264	7.15516	4.98325	12.7498	8.19951	10.9644	4.96459	4.85271	5.41366	8.87906	9.68099	9.95525	5.44159	3.32226	6.68267	11.1605	9.87984	9.37971	2.70616	2.13779	3.44635	7.8859	7.26379	6.30179	10.1954	7.9686	10.6292	6.04365	4.03947	5.94206	2.99327	3.14265
5q31.1	NM_003687	8572	PDLIM4	PDZ and LIM domain 4	1.60056	0.678576	0.000489257	0.00808246	13.3631	16.7659	8.43541	9.03293	9.60295	7.04971	12.667	7.67441	5.10526	4.35877	4.25267	5.41057	3.26989	5.70843	6.52783	1.72687	1.48327	1.52012	7.66657	6.58638	7.50913	3.34594	4.94904	2.45856	5.51825	7.67297	9.44605	10.3588	9.40994	4.32466	7.12458	5.53437	5.67395	6.78287	5.81064	3.45381	3.44302	3.93849	3.7692	5.86079	7.68977
19p13.3	NM_015675	4616	GADD45B	growth arrest and DNA-damage-inducible, beta	1.33381	0.415554	0.000490989	0.0080843	7.95559	17.5075	11.2788	8.87228	9.8101	8.79724	6.21337	4.99244	12.9968	8.49888	7.62729	7.74143	6.82929	5.92338	4.78989	1.57149	2.31882	2.46894	7.73497	7.74849	8.70161	7.38795	5.111	4.34097	7.64213	8.68454	8.5007	7.61628	8.27481	3.87151	7.42513	5.7458	7.32973	11.0009	7.56543	6.71823	6.41747	6.18778	5.66179	5.51348	8.01373
6p21.31	NM_003214	7005	TEAD3	TEA domain family member 3	1.51243	0.596865	0.000490793	0.0080843	7.66892	13.2168	17.0792	11.9886	10.2468	8.83641	6.95701	1.90224	26.5442	4.74382	5.58415	4.10142	5.96486	6.3801	5.74151	1.51424	1.39814	1.32009	7.34195	6.3417	8.00552	5.27929	4.01899	3.87446	7.27315	9.06697	9.46608	8.48643	9.29803	4.82257	9.36998	7.40456	6.61685	9.5046	6.9768	5.70099	3.89877	3.49332	2.60276	4.57836	4.82456
2q33.1	NM_153689	205327	C2orf69	chromosome 2 open reading frame 69	0.781505	-0.355673	0.00049222	0.00809122	1.29546	4.89719	3.42225	3.02987	2.41703	4.27527	3.05735	4.33845	3.81468	6.53564	6.7192	5.74236	4.25808	5.54344	4.39387	8.32249	7.69029	6.91837	2.96076	3.58801	3.45783	3.45836	4.21772	5.50794	5.51858	3.88229	4.4795	3.14607	2.3083	5.77522	3.84888	4.44246	4.04716	4.02028	4.53221	5.34706	6.11263	4.20877	5.25985	2.91124	3.75575
6q25.3	NM_032861	84947	SERAC1	serine active site containing 1	0.81454	-0.295943	0.000493991	0.00810698	1.37896	1.68112	1.78355	2.16106	1.59473	2.27938	1.62037	3.36456	3.02846	3.01922	3.0783	2.02331	2.48351	2.94112	3.12798	6.18999	5.51974	5.06328	4.13668	4.96995	4.32416	2.25097	1.7832	2.30271	2.78829	2.11734	2.45244	1.53833	1.10039	2.32603	2.69514	3.04963	2.38008	2.68983	2.59578	2.86694	2.40254	2.3978	3.62378	2.17474	1.89835
16q24.1	NM_206967	404550	C16orf74	chromosome 16 open reading frame 74	1.73491	0.794857	0.000499221	0.00816907	3.99224	2.3784	5.36629	4.32582	4.15608	2.72319	3.45563	3.35781	3.3137	2.30069	2.4159	1.98704	3.63828	1.85854	1.46593	0.590244	0.657752	0.600571	4.31658	2.98507	3.06351	0.86407	1.26215	0.714916	4.50374	3.90883	3.9166	1.60254	3.33484	0.962375	2.98076	2.24574	2.5751	4.58332	3.80083	3.59124	2.09473	0.647368	2.21366	1.64724	0.978649
8q12.1	NM_052898	114786	XKR4	XK, Kell blood group complex subunit-related family, member 4	0.800033	-0.321869	0.000499412	0.00816907	4.31517	0.80132	1.17561	0.822375	1.57951	2.6567	3.74135	4.39812	1.66795	1.22042	2.01058	1.38736	2.7015	4.74222	4.14766	11.0028	12.3739	10.5192	2.30209	2.07745	2.02979	4.29585	4.03082	4.88225	2.95314	2.46306	2.35662	3.43194	2.66635	6.99061	1.68546	2.08552	1.76602	2.43318	3.52591	3.46731	2.58566	2.84894	3.09471	1.5394	1.56725
15q24.3	NM_032808	84894	LINGO1	leucine rich repeat and Ig domain containing 1	0.619116	-0.691718	0.000502471	0.00820565	6.23006	7.58997	4.48516	3.62058	0.75823	1.66073	5.50009	0.873198	3.26207	4.62068	5.21256	6.43399	5.64052	2.75515	3.93025	5.73908	6.39328	6.35422	7.05281	5.50925	6.52816	2.38576	3.60252	2.80624	6.52091	8.2489	6.72524	10.0646	6.63369	4.04752	6.58735	5.67734	6.50327	7.34689	6.62276	4.44759	10.1101	11.1472	8.26052	4.76436	6.07652
2q33.3	NM_003812	8745	ADAM23	ADAM metallopeptidase domain 23	0.753391	-0.40853	0.000505229	0.00822378	1.09694	1.78448	0.848592	0.637461	1.20019	1.96534	1.65273	1.7195	0.82436	1.92264	1.9073	1.40091	3.10493	2.56414	2.75861	4.25862	5.04498	4.34563	1.49108	1.71171	1.10217	2.45499	1.63073	2.42833	2.28853	1.82022	2.00306	1.17981	0.94037	2.08069	2.00101	1.98123	1.81885	2.94213	2.91095	2.98539	2.9865	3.80012	3.45586	1.14258	1.30705
14q24.3	NR_104184	100506603	LOC100506603	uncharacterized LOC100506603	0.796756	-0.327791	0.000504453	0.00822378	12.9602	9.51942	4.86654	5.06066	5.22089	5.98677	9.91515	3.97841	4.74068	7.92646	7.30428	8.66881	6.83636	10.8444	8.86978	9.02728	9.99299	11.347	10.2554	8.74568	7.95569	10.4905	7.50065	7.9239	6.72158	7.63155	9.54611	11.2406	10.2454	7.65132	10.1193	10.9795	11.7491	7.98133	8.10833	7.71222	8.33969	9.44665	6.48638	6.79532	7.12306
6q23.2	NM_004830	9439	MED23	mediator complex subunit 23	0.750448	-0.414176	0.000512832	0.00833394	1.17986	3.16988	2.26808	2.19	2.76119	3.12795	1.59129	3.12622	5.4332	3.788	3.83208	2.62595	5.78423	4.45771	5.11322	3.23984	3.7302	2.87206	4.20462	4.94893	5.08086	3.32718	3.28059	4.95373	4.59499	4.02905	3.75306	2.59325	1.91246	4.06421	3.35387	3.54541	3.2612	5.01525	3.83238	5.66499	5.11633	3.84124	4.92001	2.82703	2.62107
11p15.2	NM_001144061	1315	COPB1	coatomer protein complex, subunit beta 1	1.1881	0.248661	0.000514447	0.00834232	6.0169	16.1802	19.234	27.5135	26.5398	30.6702	19.3509	27.1967	49.4528	17.2812	22.2963	12.2202	21.1766	23.9785	27.0084	11.1503	11.6577	10.1871	15.0333	15.164	14.6113	12.1361	8.38894	17.6294	26.928	25.5468	24.5247	4.93713	6.64756	10.3425	18.7781	16.9369	16.4036	29.2296	21.8916	23.8849	14.8366	10.0098	14.5364	9.41838	8.59132
10p15.1	NM_005863	10276	NET1	neuroepithelial cell transforming 1	1.2398	0.310106	0.00051502	0.00834232	1.27559	11.9424	8.03642	6.31586	10.5134	12.8487	2.25639	3.21715	12.5971	8.45374	8.98274	5.92293	12.7959	8.38036	12.3278	0.835534	0.959208	0.488284	5.31853	7.71185	7.2481	2.94173	1.55551	3.70462	11.7043	8.97231	8.38143	1.51405	1.61769	4.90574	6.71199	5.96036	6.96297	8.41374	4.58232	6.0918	5.40702	2.99874	5.50767	2.42834	2.1114
5q11.2	NM_003711	8611	PPAP2A	phosphatidic acid phosphatase type 2A	1.28149	0.357822	0.000516997	0.00836077	4.10088	9.90745	10.4057	10.6617	9.86886	7.76116	4.1515	9.51536	13.103	3.89231	4.80499	3.5011	8.12757	7.29872	7.65542	4.60211	4.1765	4.25109	4.69566	5.05694	5.47007	6.77318	4.84556	5.59667	8.81531	7.74819	6.70233	4.22909	3.49609	7.6414	7.61034	6.33008	6.69509	8.4427	5.79738	6.14786	7.83158	6.24311	7.15161	6.80362	2.22135
2p22.2-p22.1	NM_001135673	64225	ATL2	atlastin GTPase 2	1.15414	0.206818	0.000519546	0.00836134	1.55057	6.03276	7.9532	10.6862	7.22489	7.39628	5.50738	6.13382	14.7929	6.1583	6.39622	4.58953	6.91749	8.57248	11.4522	4.68033	2.55281	2.74494	5.09564	8.34075	6.99158	4.69568	2.32286	5.33192	8.94238	6.52793	6.8232	1.99474	1.61222	3.60074	6.993	7.08518	6.86201	8.03234	6.3959	7.81333	5.92996	4.8017	7.04973	3.3522	3.80122
15q14	NM_020371	57099	AVEN	apoptosis, caspase activation inhibitor	1.45917	0.545145	0.000518936	0.00836134	2.09462	5.38046	7.46956	6.75989	5.70664	5.36799	2.02533	2.37547	10.0058	4.30427	4.08604	2.59504	6.20883	4.12509	4.33362	2.56269	1.79776	1.97277	4.58604	4.28246	4.46515	1.47851	2.17465	1.92386	4.20574	2.73509	3.00366	1.34041	1.3336	3.71256	2.98022	3.49718	2.7173	4.63246	3.53264	4.07215	3.18762	2.50959	3.23022	2.07409	2.64076
22q13.33	NM_001130921	11158	RABL2B	RAB, member of RAS oncogene family-like 2B	0.763258	-0.389757	0.000518664	0.00836134	2.08637	3.84058	1.85535	1.35829	1.56587	2.08879	0.677923	1.47362	2.44222	2.28179	2.52506	2.87785	3.05657	2.4584	3.20362	2.93676	3.60574	2.57704	1.98912	3.13339	1.81428	2.5993	1.90455	2.932	4.51928	3.09725	2.08053	7.74814	5.02857	5.30129	1.8209	2.84831	3.37764	3.50121	1.68037	2.00436	5.07376	5.79264	5.17448	1.96883	3.78302
10q24.2	NM_021732	60370	AVPI1	arginine vasopressin-induced 1	1.58337	0.662998	0.000522228	0.00837969	6.4813	8.24574	7.08245	7.61914	5.35799	4.03193	8.11055	4.92341	8.56439	3.59215	4.5897	4.02349	2.12675	3.98722	2.66971	2.81768	2.14385	2.43487	3.87014	3.96621	5.90834	2.7264	2.36909	2.28329	3.19321	3.37809	5.08471	6.17944	5.36446	3.24271	5.54238	4.62819	5.17775	4.88736	4.55655	2.49174	3.3828	4.03951	4.14646	4.28431	4.48589
1p31.3	NM_001077701	57708	MIER1	mesoderm induction early response 1, transcriptional regulator	0.646443	-0.629406	0.000523206	0.00837969	0.46692	2.17765	3.13229	1.63078	1.89145	2.22121	0.239717	0.75913	4.66114	4.75132	3.26251	2.80098	5.11368	3.446	4.28164	2.10523	2.76693	1.5533	4.28827	3.26338	3.94627	2.25666	2.78971	2.12655	3.32378	2.77087	3.14632	1.98504	1.6001	2.75006	2.72833	3.54955	3.86007	3.53796	3.26339	5.11388	2.17922	2.87065	3.29322	2.09148	2.55232
5q32	NM_000112	1836	SLC26A2	solute carrier family 26 (anion exchanger), member 2	1.30324	0.382106	0.000522813	0.00837969	1.28293	5.64765	5.68586	4.50623	5.68248	7.71454	1.23852	1.61495	6.40835	3.40353	3.45199	2.05855	5.34196	4.096	5.23516	1.47011	1.73836	1.52206	2.86933	3.58962	3.26125	2.19964	1.75272	2.49848	3.96091	3.39397	3.81511	1.65054	1.14027	3.18857	4.1721	3.53292	3.59938	4.19133	4.14179	4.11642	2.32272	1.62945	2.18262	1.57975	1.70304
19q13.43	NM_003417	9422	ZNF264	zinc finger protein 264	0.860323	-0.21705	0.00052869	0.00845396	1.75029	3.55858	2.66683	1.7318	2.00578	3.07671	1.89707	1.98952	4.24928	3.33899	3.54958	3.53332	3.11025	2.8401	3.16287	2.85553	3.29888	3.44849	3.48106	3.70515	3.58122	3.52002	2.93901	3.38988	3.5608	2.91978	2.95832	2.505	2.06645	4.05897	3.19534	3.53901	3.50483	3.32515	3.56223	3.47798	3.21514	3.74871	3.3515	1.73061	2.02849
1p35.1	NM_013411	204	AK2	adenylate kinase 2	1.21186	0.277221	0.000534841	0.00849462	4.08681	7.06813	19.269	13.5845	10.7329	8.56276	4.07137	7.25924	11.7488	5.58207	8.09049	4.87754	11.5706	12.1336	11.1248	2.91863	2.85014	2.59748	8.52027	6.8758	7.03315	5.87812	5.53059	5.32619	10.888	8.67894	8.62288	4.1543	4.7688	5.77874	8.43868	8.592	7.02212	8.65199	5.48299	7.30237	6.63712	5.49695	5.96103	4.58596	3.99535
11p15.5	NR_046331	9024	BRSK2	BR serine/threonine kinase 2	0.655941	-0.608362	0.000538858	0.00849462	4.53746	2.46169	1.44626	0.636978	1.47931	0.774206	5.61471	1.53523	0.623396	4.59886	3.53199	4.08023	1.30063	3.03809	1.06613	6.22945	6.60893	6.4222	2.22532	2.49162	2.76297	3.53799	4.10937	3.72008	2.50199	2.57121	3.79372	3.31769	4.75801	1.56751	3.15632	3.63433	4.13608	2.01369	2.52786	3.60734	3.39617	3.98452	2.82414	3.17956	3.31202
12q24.31	NM_003746	8655	DYNLL1	dynein, light chain, LC8-type 1	0.932996	-0.100058	0.000535661	0.00849462	206.722	223.282	148.337	169.418	156.768	164.169	89.3694	159.973	100.367	209.652	186.991	195.989	219.26	158.342	158.511	126.347	124.421	123.815	153.654	138.083	153.394	116.325	198.999	130.651	156.236	177.102	182.535	312.942	296.966	158.388	161.584	159.128	144.714	200.177	194.417	133.443	197.074	194.172	202.119	293.986	294.108
14q12	NM_017769	55632	G2E3	G2/M-phase specific E3 ubiquitin protein ligase	0.751442	-0.412267	0.000534711	0.00849462	1.43395	3.59998	3.20366	4.21042	3.61183	5.65359	1.9516	5.17169	4.42205	5.75871	5.36853	4.38651	7.24942	6.19083	6.96282	6.45703	5.23093	5.01609	4.52087	5.10158	4.32682	4.26418	4.83056	5.83388	6.12283	5.36646	5.35411	3.06377	2.58463	4.51332	5.03745	5.3457	5.09343	5.38875	5.46214	7.86605	4.63285	4.77836	4.8484	3.25807	3.65535
6p22.3	NM_001546	3400	ID4	inhibitor of DNA binding 4, dominant negative helix-loop-helix protein	0.687184	-0.541232	0.000538895	0.00849462	18.639	30.1892	13.3181	12.1021	12.6268	17.9985	18.5431	26.1705	7.38446	52.0303	48.4994	51.7802	28.7938	44.1152	24.4919	37.1343	36.3512	33.2273	10.3492	11.5757	11.7285	42.2798	50.8742	50.2977	39.7443	38.4068	40.3582	24.1133	18.8112	29.0599	31.4917	35.9407	32.9194	21.6307	27.1519	35.2629	33.2959	28.1023	31.5523	44.7277	34.5364
19p13.3	NM_020170	56926	NCLN	nicalin	1.39371	0.478928	0.000536592	0.00849462	10.5843	18.3664	12.3723	13.2875	9.83476	9.06785	7.97539	3.79868	11.3045	5.0188	5.97729	5.46802	3.9473	5.2637	6.09697	4.57944	4.45511	5.33979	6.1258	4.84831	6.26055	6.63141	5.49974	4.00614	6.46098	8.40803	9.92299	10.5273	8.82625	4.95613	7.79839	6.81811	7.09468	8.2143	7.0643	4.6159	4.93602	4.49885	4.5649	6.09936	6.52182
17q12	NM_003559	8396	PIP4K2B	phosphatidylinositol-5-phosphate 4-kinase, type II, beta	0.807445	-0.308564	0.000532554	0.00849462	14.2903	17.5966	16.3023	10.0012	17.478	22.5453	20.2868	10.9284	13.1042	18.1193	25.0631	24.4218	18.7944	20.7166	15.3427	52.5071	55.1676	55.5525	23.5899	21.379	21.4508	31.2447	22.8064	24.1776	21.7755	18.2102	18.7156	15.3514	14.4559	22.7176	18.7018	22.4729	18.7918	19.3338	19.4266	20.0609	19.2983	23.0448	21.1228	10.7898	11.2027
22q13.2	NR_002184	91695	RRP7B	ribosomal RNA processing 7 homolog B (S. cerevisiae)	0.775693	-0.366443	0.00053818	0.00849462	2.31182	3.02048	3.95811	2.98402	1.80015	2.315	2.76571	1.33167	4.14196	3.13701	2.59601	3.06424	2.47587	3.53647	3.11649	4.35207	4.56588	4.90638	5.66733	4.86372	4.112	6.75851	3.69015	5.38877	4.33258	4.07723	4.72201	6.93891	5.82559	3.84129	4.33354	4.32736	4.71634	3.99736	2.69398	3.22255	3.55236	4.19973	2.80393	1.62184	2.1673
4p14	NM_015173	23216	TBC1D1	TBC1 (tre-2/USP6, BUB2, cdc16) domain family, member 1	1.35012	0.433086	0.000534068	0.00849462	3.49767	7.12544	12.4734	10.6547	9.26174	8.21026	4.03641	3.64388	23.4088	5.46336	6.02208	5.01062	9.10763	4.60506	7.89603	2.31551	1.74464	1.87049	6.41264	7.31998	7.67772	3.57566	2.85132	2.98785	8.98852	6.29246	6.45745	3.97241	3.64222	8.23628	6.71721	6.60688	5.98684	7.76018	6.13612	7.74662	5.5238	4.05366	5.70131	2.99353	2.4003
21q22.2	NM_001007246	54014	BRWD1	bromodomain and WD repeat domain containing 1	0.728052	-0.457887	0.000541445	0.00851656	5.63739	5.27494	5.65679	5.451	5.05311	7.03798	8.14973	14.159	4.91395	13.355	12.0963	13.9959	5.8917	13.9394	7.89858	22.0995	21.829	19.0387	5.6292	6.38488	6.06898	14.1295	17.5452	15.1715	8.93818	9.08553	9.11741	6.62613	4.6545	10.8765	9.89496	11.524	8.37362	9.21919	12.6822	10.522	10.2723	10.0637	11.6146	8.35007	6.50506
12q24.23	NM_001278557	55884	WSB2	WD repeat and SOCS box containing 2	0.847534	-0.238658	0.000541994	0.00851656	14.5826	13.6905	17.668	11.6041	15.3453	21.2331	19.315	28.5961	14.8066	24.3445	24.9832	22.8209	15.9427	19.9351	15.1516	47.3825	51.3387	49.8305	24.1785	15.6251	19.0443	25.3489	32.3733	29.2224	16.0002	13.6419	11.7454	21.2088	19.3657	25.3051	23.5934	22.2425	22.9249	16.5875	22.6988	23.8868	21.9109	21.8714	19.5849	19.6777	14.9794
11q13.4	NM_001258392	81570	CLPB	ClpB caseinolytic peptidase B homolog (E. coli)	0.853289	-0.228894	0.000545343	0.00855535	7.35346	6.54764	6.22368	2.56161	6.2395	7.23823	7.7969	4.30683	6.59657	6.43716	8.12827	7.6608	6.3963	8.76966	5.73435	13.8995	13.5959	15.6324	6.62748	5.82151	5.82299	9.98991	8.61782	7.34222	5.43113	5.05554	4.91654	9.02484	8.84204	8.9512	6.74958	8.02252	7.30667	7.37987	8.02755	5.20072	7.53032	8.15104	7.58872	5.57434	6.279
1q21.2	NM_014849	9900	SV2A	synaptic vesicle glycoprotein 2A	0.727523	-0.458935	0.000546177	0.00855535	16.5023	10.9992	7.305	4.60422	10.1853	12.0195	22.2391	9.0818	5.87876	15.7172	18.0018	19.7021	7.67809	13.385	8.3533	34.5318	35.7006	38.5465	15.2721	12.0677	13.401	21.8742	17.8736	19.3208	12.1013	13.3951	14.4099	15.6321	13.6381	9.85377	16.5129	21.1277	17.6521	14.5589	18.3817	14.6388	15.519	21.7668	16.1046	11.2817	12.6525
16p11.2	NM_194280	124446	TMEM219	transmembrane protein 219	0.786686	-0.34614	0.000548691	0.00858125	25.2578	18.0188	23.6548	22.0564	18.6352	13.7338	19.5156	19.2414	19.3881	35.6368	25.2121	25.5486	27.0259	29.3724	34.0191	17.9811	17.8556	15.7797	31.6058	24.5282	27.6046	12.2055	26.0581	20.3317	35.8136	35.6081	41.074	57.7524	51.3808	21.2114	42.9583	38.4867	38.6846	47.9345	37.1557	30.4471	32.6051	25.4472	28.8274	42.8974	44.5405
15q12	NM_000814	2562	GABRB3	gamma-aminobutyric acid (GABA) A receptor, beta 3	0.565682	-0.821937	0.000552318	0.00862446	2.31181	2.36799	1.09026	1.10553	4.02962	1.10171	1.54291	7.48067	0.880339	2.17794	6.08674	7.16655	3.93384	4.07546	2.03059	14.3841	15.0917	16.4236	2.53148	2.20593	2.47741	4.67983	6.71438	5.9126	4.53206	3.55205	3.27229	1.67971	1.2253	4.57238	3.20011	5.58643	2.53321	2.16891	6.10477	5.52729	5.6043	4.13742	5.66537	2.96754	3.71098
2p22.1	NM_001167959	130733	TMEM178A	transmembrane protein 178A	0.544257	-0.87764	0.000555563	0.00866157	2.0949	0.841867	1.81245	0.921177	0.544795	1.22526	0.000106	3.47164	0.023751	4.02154	2.82362	2.97075	0.926965	5.48775	2.89614	2.64743	2.97057	1.63091	1.55665	2.84957	0.794618	3.23918	3.70252	3.44081	3.97907	3.58225	2.70904	4.16044	1.60286	1.98185	2.75742	3.67296	4.74681	4.21368	4.6852	2.52574	4.20251	4.13767	2.71063	2.82729	2.80452
1p33	NM_001441	2166	FAAH	fatty acid amide hydrolase	0.797054	-0.327251	0.000556892	0.00866875	5.10353	4.09291	2.05949	1.95191	2.35704	2.18016	5.45865	3.42231	2.96951	4.68982	4.51809	4.46199	3.26798	2.98273	3.42349	5.84499	5.75217	5.84502	3.42676	2.96299	3.72769	4.5201	3.98258	2.96974	5.27344	6.07911	5.18342	8.64996	8.1627	4.66033	5.32681	4.64939	4.82645	3.89613	4.57423	3.39238	3.0594	4.15593	3.27713	4.20418	4.80308
15q13.1	NM_004667	8924	HERC2	HECT and RLD domain containing E3 ubiquitin protein ligase 2	0.801364	-0.31947	0.000558021	0.0086728	3.08499	5.78896	3.08524	1.78065	2.94597	4.10334	4.06623	1.9616	4.47524	2.9795	4.27419	3.49879	4.73895	6.21838	4.48823	5.5614	6.10758	6.35201	5.70738	5.4772	4.4482	6.81505	3.83991	4.20942	4.09037	4.5981	4.59175	4.06304	4.19124	5.96218	4.24106	5.21439	4.94913	5.32865	4.49273	3.71263	4.89891	6.21277	5.15732	2.54668	2.36945
19p13.3	NM_001130111	81926	ABHD17A	abhydrolase domain containing 17A	1.26069	0.334208	0.000561976	0.00872068	37.0784	46.3733	33.5138	29.8626	25.4889	18.3955	41.0516	29.2964	24.485	14.4459	15.2673	16.9431	17.5356	13.4389	15.8096	14.1515	12.3039	22.0912	15.3073	12.5755	15.4938	13.598	14.6231	10.8857	18.0405	22.9882	28.6203	23.1182	20.3304	7.96358	23.0596	20.5411	22.1074	17.278	20.2043	14.0495	15.3762	11.7232	12.8652	22.5107	29.4868
9q22.33	NM_001333	1515	CTSV	cathepsin V	1.70042	0.765892	0.000564839	0.0087515	0.313912	1.28487	6.79406	6.26101	4.99718	4.08456	0.538496	1.2327	11.419	3.04	2.30139	1.90243	4.21341	0.555839	2.47866	4.2e-05	0.416784	0.444262	1.2327	1.44503	1.29346	0.56169	0.60121	0.853511	4.72192	4.45527	3.24921	0.450923	6.8e-05	1.1353	3.52761	2.56851	2.07849	4.82528	3.20424	3.33074	0.671468	0.568986	1.06284	1.05746	0.332214
4q22.1	NM_000345	6622	SNCA	synuclein, alpha (non A4 component of amyloid precursor)	0.582229	-0.780341	0.000567163	0.00877387	0.931505	1.62014	2.59825	1.62168	1.50071	2.05496	3.55846	3.64841	1.04568	7.00236	6.79529	6.7393	4.50727	6.33175	5.63148	8.59075	11.2174	8.05297	6.9494	7.27353	7.46577	2.96136	2.56686	3.80047	3.43717	2.24343	3.66963	0.997801	1.53524	3.05885	4.41238	5.52452	4.89467	2.22106	1.87204	2.7512	5.25209	3.6616	7.34456	2.43181	2.54191
12q13.2	NM_005811	10220	GDF11	growth differentiation factor 11	0.704819	-0.504675	0.000568833	0.0087861	7.10572	10.1407	5.29757	3.90069	4.28654	5.38185	4.86061	2.57148	3.10376	3.65387	3.97052	3.68172	9.08312	6.98563	6.03316	7.94865	7.96812	10.2543	13.7579	12.8269	13.7924	7.29107	7.11405	4.86513	6.97878	6.96953	7.4382	16.1231	12.4143	11.9987	9.01581	9.94921	8.30429	8.31875	8.54104	6.54596	9.99962	10.8065	9.58874	6.1281	7.5368
6q22.1	NM_015952	51389	RWDD1	RWD domain containing 1	1.19325	0.254901	0.000571007	0.00880605	3.4723	12.7443	13.318	12.9396	17.1855	17.0774	6.02145	13.072	14.5338	10.141	11.1062	8.43192	16.1728	6.64183	9.70017	6.10119	4.2709	4.18043	12.3355	12.0062	17.0089	3.98431	4.84488	7.58993	9.63116	7.82482	8.75334	4.11488	3.94758	7.57872	8.74071	8.67602	9.37414	10.3898	10.4903	14.8613	12.7953	7.00811	8.36364	5.85668	4.92543
16p11.2	NM_007074	11151	CORO1A	coronin, actin binding protein, 1A	0.559567	-0.837616	0.000582981	0.00896299	4.09092	2.09978	1.20103	2.0285	1.86178	1.97486	5.30501	2.87385	0.133597	5.79221	5.65778	6.33013	4.28321	7.20143	3.31607	8.6183	7.00035	8.15368	1.52275	1.41332	1.46155	6.64228	7.58251	5.3896	4.2526	5.32105	7.40681	4.35948	5.22072	2.33756	5.14645	4.72851	5.89908	5.1518	6.19501	4.38546	2.89114	3.01521	3.25255	5.89229	7.34847
22q11.21	NM_001017964	150223	YDJC	YdjC homolog (bacterial)	1.45637	0.542373	0.000582905	0.00896299	8.74067	5.66083	7.52092	7.86249	6.14584	5.01654	9.42311	7.7244	10.0865	6.69944	5.68908	5.93502	3.89308	3.24854	4.13577	3.38944	3.0271	4.17459	4.39976	3.9201	4.26719	3.53956	3.47898	3.48219	4.27597	5.17607	6.61261	4.90267	4.77438	1.69576	4.90852	4.88622	4.93312	5.56113	7.80231	4.38225	3.99397	2.74179	4.1047	5.054	5.52801
16q23.2	NM_018455	55839	CENPN	centromere protein N	1.60326	0.681004	0.00058918	0.00904436	1.12076	2.37468	2.07746	3.57207	2.82002	2.21952	2.01747	3.89945	2.32864	1.23826	3.27734	2.16939	1.61343	2.12479	2.78613	0.631961	0.567874	0.556699	1.12979	0.761229	1.32825	1.26488	1.70499	0.85327	2.53778	2.71789	1.96491	0.46526	0.245382	0.824506	1.94431	2.41488	2.11789	1.84458	1.19649	1.19736	0.976676	0.630133	1.40372	1.41208	0.746781
9q34.3	NM_000718	774	CACNA1B	calcium channel, voltage-dependent, N type, alpha 1B subunit	0.757945	-0.399835	0.000590341	0.00904826	2.22372	0.433524	0.486949	0.469904	0.355003	1.24339	3.49279	1.45465	0.000198	2.12983	2.35814	2.80351	1.54758	3.07988	1.06811	5.39816	5.46899	6.44318	1.0536	0.855657	0.443397	4.73932	0.677469	2.77219	1.381	1.76777	1.93746	2.63744	1.84832	1.34715	1.79873	2.07377	2.38201	1.51044	1.86978	1.74553	0.369531	2.42577	1.42153	1.53109	1.84587
19q13.43	NM_021089	7554	ZNF8	zinc finger protein 8	0.858405	-0.22027	0.00059277	0.00907157	7.14037	7.30014	8.20254	4.60674	7.64758	9.1848	8.89599	6.7339	7.14994	9.42955	10.4955	10.6211	11.0607	8.94838	8.15349	11.7302	10.3219	11.7778	9.501	7.93082	8.13404	11.0197	8.12525	9.06782	8.65136	9.73322	8.8219	6.9481	7.68814	9.70865	9.19284	10.3082	9.38762	10.0321	9.97272	8.99388	7.18719	10.374	6.81927	5.29205	6.46402
19p13.3	NM_138393	92840	REEP6	receptor accessory protein 6	1.54833	0.630715	0.000594772	0.00908826	8.37292	4.38413	38.7871	31.1546	12.8902	8.03419	6.77271	2.50034	8.88164	4.62128	4.22998	3.61515	4.18536	7.15743	4.64139	2.75465	2.43153	3.20276	7.51987	5.32203	6.47747	3.96265	2.71329	3.28524	4.02202	3.38291	6.32792	7.08778	7.76677	3.8779	8.58794	7.86411	7.65427	5.12768	5.26401	3.62346	6.76051	5.58694	5.50265	5.29939	3.90497
1q22	NM_005572	4000	LMNA	lamin A/C	1.40422	0.489769	0.00059824	0.00911992	28.8376	46.6858	43.1711	26.9082	40.3196	31.5635	23.709	7.39401	57.733	16.9166	20.3805	15.2047	6.0218	13.74	11.771	5.80393	3.55622	6.38884	16.763	14.6809	15.536	18.581	16.4808	13.3039	32.184	33.2544	31.544	30.0538	28.9023	18.7709	25.1175	22.1756	20.15	31.952	17.9942	14.2854	16.3043	9.35016	9.68107	13.4205	17.068
3q22.1	NM_016577	51560	RAB6B	RAB6B, member RAS oncogene family	0.692518	-0.530076	0.000598672	0.00911992	11.4125	7.08168	4.5689	3.99831	6.41681	8.0579	13.6318	9.84368	1.52514	9.26616	10.1778	11.8251	6.10837	9.63998	5.91815	23.3606	25.9063	29.0116	10.7645	9.04538	9.90397	15.8141	14.6459	15.3531	7.4514	8.15676	9.36449	11.4335	10.2288	9.80101	10.5194	11.2746	10.0747	9.4364	13.0637	11.5342	10.2369	14.5524	11.6435	6.16406	6.54403
Xp11.3	NM_001257291	84679	SLC9A7	solute carrier family 9, subfamily A (NHE7, cation proton antiporter 7), member 7	0.734451	-0.445263	0.00059966	0.00912105	1.18528	1.72911	1.66359	1.13436	1.82894	2.78787	2.23561	2.26142	3.74687	2.80542	3.79354	3.39244	2.09494	2.1677	2.26836	15.6214	17.4777	17.6696	2.56088	2.39432	2.59662	3.03045	2.23244	2.61727	2.58769	2.4113	2.2108	1.35084	1.16862	2.59074	2.47976	2.60242	2.49782	3.1546	3.17323	3.80132	4.21533	5.0843	5.40614	1.74986	2.18362
12q24.31	NM_000017	35	ACADS	acyl-CoA dehydrogenase, C-2 to C-3 short chain	1.74682	0.80473	0.000604502	0.00915527	9.24963	4.87656	10.0293	11.0983	6.41333	4.96708	5.47402	3.45488	10.5557	4.43273	4.07667	3.46324	2.16631	5.02019	4.33958	0.604427	0.83711	0.798016	4.8097	4.28864	4.90054	2.56059	2.19074	2.16549	4.48184	5.21138	6.74938	7.90041	6.28429	2.88374	5.21196	4.35293	4.55583	6.06975	4.55946	2.85231	2.40902	1.92009	1.66259	4.51325	4.16695
17q21.31	NM_198475	284069	FAM171A2	family with sequence similarity 171, member A2	0.789823	-0.340399	0.000605686	0.00915527	31.6207	22.7423	16.0318	15.259	13.4879	12.63	34.3988	18.6861	6.51703	21.623	24.9396	28.6519	19.7548	16.9799	16.8654	26.8551	26.8454	29.4962	32.5196	25.321	30.9847	16.6944	16.7349	15.0536	20.0968	18.2742	25.4257	35.2084	31.5173	19.0816	24.1638	23.5524	26.5176	20.0439	24.2587	18.4102	30.7902	27.857	31.2392	31.342	33.4338
15q25.2	NM_016073	50810	HDGFRP3	hepatoma-derived growth factor, related protein 3	0.786399	-0.346666	0.000606027	0.00915527	8.87002	15.3853	15.8236	13.7082	16.7334	23.627	16.2877	27.635	15.5756	25.8169	25.3916	24.4215	29.9071	28.4247	20.9883	56.4814	48.6681	44.9355	20.8645	24.518	24.3789	18.9265	22.7427	28.3429	25.0212	20.1682	21.0538	10.3627	10.3974	19.7977	20.3374	23.2632	19.8641	23.1457	23.0206	30.01	24.4703	22.0518	28.7935	16.6728	15.5151
11q13.1	NM_024771	79829	NAA40	N(alpha)-acetyltransferase 40, NatD catalytic subunit	0.897672	-0.15574	0.000603264	0.00915527	5.10329	5.70367	7.22241	4.23763	6.12299	4.73335	5.34668	3.91115	7.45969	5.32956	5.34748	4.42734	6.35645	9.78983	6.12101	7.70652	7.90716	7.25406	7.78507	6.90742	7.23727	7.16932	5.98707	5.28565	6.91511	6.65657	7.02206	8.85566	7.17511	7.27879	6.67929	6.76892	6.60851	6.94634	6.21999	5.75573	5.20096	6.86299	5.31819	3.77909	3.62677
2q37.3	NM_001271893	117581	TWIST2	twist family bHLH transcription factor 2	2.22891	1.15634	0.000606498	0.00915527	5.19544	10.2338	1.5e-05	0.202214	4.78206	5.44467	5.61508	5.421	0.182819	0.634293	0.654548	0.110263	1.69012	3.36034	1.36357	0.537412	0.490142	0.243159	0.170943	0.61027	0.214569	2.73371	2.06093	3.22638	2.27616	1.90888	2.92438	1.29777	0.781423	0.548933	0.982526	1.38533	1.48521	1.71891	0.871331	0.516764	0.414981	0.576711	0.840638	1.53694	1.46
2p23.2	NM_005253	2355	FOSL2	FOS-like antigen 2	1.34654	0.429259	0.000608718	0.0091749	4.18624	8.46041	23.7413	12.3295	21.9264	21.8524	5.86981	2.22515	23.4653	9.74703	9.68741	8.04651	11.5551	6.98352	6.63849	2.04495	2.30701	2.4259	7.53335	6.51945	8.15585	8.15075	4.02576	5.83442	17.1207	17.7261	16.0546	6.68272	5.65963	7.1771	13.2208	10.2875	10.7313	17.789	9.28701	7.89912	4.97284	2.84313	4.34684	4.35999	3.98087
15q26.1	NM_207446	400451	FAM174B	family with sequence similarity 174, member B	1.51421	0.598563	0.000613436	0.00923207	2.92169	3.01282	3.54711	3.44396	2.21346	2.44946	2.52317	2.18143	2.35566	1.85288	2.31102	1.74779	2.00818	2.45376	2.19542	1.70158	1.92396	2.09123	1.70619	1.59597	1.65867	1.85348	1.8632	1.75783	2.01164	1.8714	2.41772	1.88761	2.0237	1.30425	2.11686	2.24147	2.29945	2.54403	1.7078	1.92396	1.66254	1.34962	1.29851	1.84091	1.62965
10q21.1	NM_152230	253430	IPMK	inositol polyphosphate multikinase	0.813792	-0.297268	0.000618755	0.00929811	0.844169	1.20359	2.00793	1.44603	1.91964	2.41794	1.0069	2.27167	2.8805	2.27351	2.83053	2.79193	2.73364	3.04394	2.49577	3.91139	3.91564	3.507	2.13816	2.70452	2.41197	2.64799	3.38458	3.74279	1.92196	1.89717	1.81737	1.37384	1.36744	3.30925	2.12345	2.32332	2.1846	1.90312	2.53182	3.28884	2.54773	2.12404	2.26317	1.54689	1.51517
10q24.31	NM_001100626	10613	ERLIN1	ER lipid raft associated 1	1.13934	0.188199	0.000628695	0.00943326	5.26856	12.1212	9.13773	9.70824	9.92094	9.55393	4.64358	7.2229	9.91997	7.58375	6.54065	5.27627	8.89189	8.74661	10.2572	3.38964	3.58226	3.76997	6.84815	7.81587	6.71965	5.13294	4.54803	5.02505	9.90279	10.9992	10.0248	5.66669	4.74053	6.45934	8.40072	8.12357	6.81182	11.7841	10.9188	10.5903	5.8674	5.628	5.50798	5.53243	4.64623
2q11.2	NM_145212	51263	MRPL30	mitochondrial ribosomal protein L30	1.15682	0.210163	0.000631337	0.00945867	5.12731	7.52133	12.7149	13.335	9.40125	8.84612	8.60977	13.8814	9.20772	8.43058	10.21	8.71058	8.19307	10.8769	9.60332	7.55481	7.75002	6.73754	5.90749	7.04152	7.00921	5.15144	7.1422	6.82974	8.37177	7.5701	7.89221	3.83111	4.16681	7.85741	8.36094	7.77502	7.0982	9.54058	10.0185	9.39472	7.08624	5.3684	7.01402	5.74629	5.10067
12q24.31	NM_001024808	605	BCL7A	B-cell CLL/lymphoma 7A	0.779248	-0.359846	0.000633579	0.00946618	9.30322	5.58995	5.88887	4.46215	6.16454	7.04484	8.58123	4.87283	3.61655	8.67481	10.3057	11.3922	5.38062	7.35887	6.52129	13.1672	14.2572	15.2533	11.3661	9.96011	9.91717	9.11188	10.3242	8.77766	5.38548	6.30142	7.51016	7.59446	8.47035	7.0071	8.48417	11.476	11.5842	7.00346	7.97541	7.9078	6.41001	9.89482	7.57877	3.99395	6.00499
16p11.2	NM_004765	9274	BCL7C	B-cell CLL/lymphoma 7C	1.19225	0.253682	0.000635632	0.00946618	31.4038	40.0102	32.4409	28.8185	28.8048	22.9462	30.1479	22.1445	21.9092	19.4798	18.9125	14.3483	23.8715	24.5496	19.941	15.3888	12.3638	11.8898	16.186	12.2735	15.0094	17.3505	19.8293	13.1059	21.3168	23.6766	28.6611	26.8971	24.1939	10.5933	19.0734	17.482	17.2969	27.1261	23.161	15.3622	16.7382	11.8551	14.022	24.8367	24.7897
1q21.3	NM_018178	55204	GOLPH3L	golgi phosphoprotein 3-like	1.11356	0.155183	0.000635603	0.00946618	2.97721	6.90852	5.86679	6.74203	5.70459	6.50905	4.65687	5.99866	9.14103	4.36229	4.50272	3.51882	6.85592	5.94193	6.90351	3.3792	3.21322	3.59286	5.71031	6.12579	6.12831	3.59776	4.27454	4.9677	6.40336	5.68911	5.90787	3.59717	2.5246	5.19717	6.06565	6.36066	6.63981	6.05983	7.00381	7.75073	5.3871	4.88258	5.80114	4.66587	4.18608
14q12	NM_006263	5720	PSME1	proteasome (prosome, macropain) activator subunit 1 (PA28 alpha)	1.0572	0.0802548	0.000634103	0.00946618	31.8492	24.4708	43.7212	44.9518	45.2134	34.0222	32.7899	46.1011	56.0933	39.4399	39.783	34.0137	33.3089	38.4859	34.1793	20.5715	18.4602	14.8271	41.8026	34.8262	36.9506	26.9631	28.8331	24.2914	40.9426	41.0179	38.7539	23.4369	23.013	25.886	37.3324	44.6539	34.5551	46.8237	34.2462	35.1631	28.4996	26.1904	25.7609	24.1187	21.4797
3p25.1	NM_024334	79188	TMEM43	transmembrane protein 43	1.10375	0.142414	0.000644206	0.00957957	12.6554	24.4557	26.1901	18.1981	28.5105	25.5799	14.9173	13.8199	27.635	19.4569	21.8629	19.5783	22.5246	20.0749	17.6153	16.3949	17.2614	16.3807	13.9097	13.928	14.2065	14.4371	13.0339	15.6328	22.6409	21.2375	21.5811	8.68506	8.75977	14.6926	16.7333	16.2499	13.3383	23.0191	16.0615	16.0527	15.9281	12.813	14.1103	11.9883	10.3291
14q24	NM_003239	7043	TGFB3	transforming growth factor, beta 3	1.54817	0.630559	0.000651247	0.00966985	3.90727	9.11137	5.60815	2.20579	9.09199	9.24957	3.77975	2.34696	4.97531	2.70739	3.66642	2.84681	6.80341	4.05582	4.21988	1.32578	1.60005	1.44626	3.83135	3.96344	3.56642	3.54822	2.09283	2.36565	6.11403	4.04113	4.77855	3.66235	3.52161	5.3305	5.38641	4.82267	3.91988	4.95092	2.558	2.83923	2.32668	1.97215	2.11047	1.50253	1.34087
11p11.2	NM_001135944	8567	MADD	MAP-kinase activating death domain	0.715557	-0.482861	0.000652355	0.00967191	3.39058	2.72069	0.999745	0.510213	1.92984	2.60824	3.10062	1.55569	2.53351	2.1313	3.09722	2.74882	3.2445	4.47317	1.95718	5.51691	5.40449	5.99075	4.73	5.02235	4.78332	5.0226	3.34831	3.28948	2.65589	2.79927	2.64547	1.46094	2.54841	3.90191	2.79251	4.79904	3.26286	3.81749	3.32075	3.17997	3.13966	4.04297	3.52503	2.04145	1.71659
13q13.3	NM_013338	29880	ALG5	ALG5, dolichyl-phosphate beta-glucosyltransferase	1.20351	0.267243	0.000654871	0.00968045	4.29922	10.4069	17.6584	20.9981	14.5302	10.9204	9.49671	21.449	22.9779	15.043	14.2211	10.144	11.9116	14.1419	13.8113	8.37213	7.91419	7.70585	8.24081	9.65807	11.3361	5.88423	4.89315	7.06628	15.6353	13.6486	12.7685	3.73935	3.53768	7.40556	9.868	8.44107	8.58059	15.8055	12.5218	14.2842	11.6139	6.8005	10.8338	6.48519	5.21231
16p13.3	NM_032366	84326	C16orf13	chromosome 16 open reading frame 13	1.33558	0.41747	0.000654771	0.00968045	21.4317	22.4896	15.7373	17.4032	16.1827	9.82942	30.6955	23.4547	13.7768	10.992	10.2756	6.5225	5.89835	12.8688	10.1838	7.76278	4.71446	8.30881	6.13668	7.27049	6.39984	10.8934	6.91932	5.92193	12.2724	12.9917	16.6063	14.862	14.1046	7.46525	14.8266	12.2924	11.2105	18.5826	20.5181	11.2679	8.97575	7.3391	10.1912	16.1129	13.5901
22q11.23	NM_004327	613	BCR	breakpoint cluster region	0.870703	-0.199748	0.000656506	0.00969027	15.5984	10.2307	13.5502	8.65476	8.09661	7.8318	12.403	4.61619	13.3964	10.2247	10.4574	11.8258	8.20581	9.47245	7.82454	16.1984	15.8574	18.5537	13.4352	11.0342	12.5875	13.1206	12.5762	11.0988	9.40893	10.301	11.6749	17.8991	17.0708	11.509	13.2145	13.9812	14.3533	10.9389	12.4924	9.90563	10.5133	12.5628	9.97048	8.17523	9.12122
10q23.2	NM_019054	54537	FAM35A	family with sequence similarity 35, member A	1.3376	0.419651	0.000661098	0.00969358	1.87035	4.9988	5.47071	6.06783	6.6662	6.92092	2.16907	6.57277	7.56031	5.26768	5.26559	3.26092	5.71426	4.60934	6.09034	3.67404	2.83408	3.47802	4.76726	4.9828	4.5173	2.71091	2.09067	3.4955	5.21716	3.96535	4.10451	1.21412	1.10841	2.188	4.2968	3.74068	3.66096	5.48962	5.15592	6.00385	3.48293	2.22868	2.92561	1.48215	1.44695
19p13.3	NM_004558	4902	NRTN	neurturin	1.76427	0.819071	0.000659921	0.00969358	3.41338	1.93712	6.13225	3.98964	3.3201	3.06042	2.70178	1.30974	3.13074	2.10915	1.77498	1.61709	1.91037	1.69359	1.47726	0.276112	0.233277	0.416764	2.41654	1.85334	2.75653	0.674722	0.986139	0.434362	2.22709	2.42496	3.29241	3.05871	2.23314	1.2973	2.64197	2.09047	3.34773	3.08547	2.37651	2.43708	1.13857	0.505055	1.15341	1.7894	2.01806
6q13	NM_012434	26503	SLC17A5	solute carrier family 17 (acidic sugar transporter), member 5	1.22286	0.290264	0.000660165	0.00969358	4.10788	6.92056	10.0537	9.85075	9.81204	8.77206	5.96336	7.68271	11.6423	6.69138	7.60129	6.55729	5.64825	6.19824	5.12196	6.82216	6.80415	5.81533	6.63349	5.94716	7.52288	6.86935	7.86607	7.55098	5.3172	5.06003	4.90785	3.97523	3.12436	5.94148	7.92033	8.23087	6.59842	7.0006	7.39987	8.0643	5.99667	4.59397	5.60332	5.18643	4.64533
3q22.1	NM_021203	58477	SRPRB	signal recognition particle receptor, B subunit	1.14204	0.19161	0.000657988	0.00969358	5.01563	17.8586	14.1877	19.0094	18.6636	20.3877	13.9337	27.5974	23.9018	19.284	21.5218	15.2983	16.5252	16.4912	18.6179	13.6233	10.9499	10.6017	11.1079	12.5912	12.4775	8.7533	8.04226	10.0504	17.7953	14.7564	16.024	4.18414	4.143	10.7939	13.9125	14.5838	11.3286	15.7044	11.9643	14.5123	13.4494	10.5896	14.4525	6.89453	7.56949
8q22.2	NM_006281	6788	STK3	serine/threonine kinase 3	1.21493	0.280868	0.000661588	0.00969358	2.41499	3.91435	5.32915	5.43857	6.77419	7.36878	3.0019	3.36619	10.3462	3.08185	3.56962	2.14048	6.46854	4.57381	7.22707	1.78488	1.21067	1.41917	5.53894	7.14313	6.15508	3.19169	2.65644	4.39678	6.09279	5.67678	4.97857	2.2635	1.82011	3.0897	4.38587	4.92536	5.08294	6.83942	4.66848	6.67734	4.0106	2.99329	4.72725	3.51273	4.0306
19p13.2	NM_001080429	57662	CAMSAP3	calmodulin regulated spectrin-associated protein family, member 3	0.670369	-0.576972	0.000668564	0.00972515	6.51339	2.56335	0.77094	1.17163	2.14544	2.40556	6.97717	2.18471	1.58159	4.25194	4.13091	5.28511	1.9673	2.04808	1.64727	7.8815	7.77774	10.0298	3.21777	2.42514	3.29589	6.27478	4.18645	5.18873	2.76457	3.10578	4.39403	7.63	7.15825	2.29535	3.19727	4.35616	4.65551	3.19611	6.58597	3.63977	3.89379	3.85164	3.76056	5.38738	5.90251
5q22.1	NR_015370	114915	EPB41L4A-AS1	EPB41L4A antisense RNA 1	1.12204	0.166129	0.000664918	0.00972515	9.21309	19.4408	20.8243	24.7564	27.238	17.8652	16.7376	25.5391	14.9982	17.0463	17.8753	16.6649	11.4639	18.1701	17.0287	14.8663	14.6923	13.5072	14.3049	14.2267	15.9887	9.35245	13.6879	16.3183	26.8695	22.6667	21.4676	4.69662	4.41824	6.98085	18.9046	18.3571	16.3775	16.0025	12.6832	17.6024	14.1662	9.93696	11.7846	9.67666	7.43744
1q22	NM_020897	57657	HCN3	hyperpolarization activated cyclic nucleotide-gated potassium channel 3	0.834699	-0.260671	0.000668195	0.00972515	1.72914	1.79505	0.866143	0.613472	1.21535	1.14093	3.39733	1.93413	0.575146	1.09786	1.27313	1.54638	1.06856	1.79704	1.04634	5.53245	6.60306	6.40316	1.45005	1.12261	1.07103	4.46111	3.51814	2.98312	1.66979	1.74261	2.21213	2.68168	2.8218	2.06321	1.91378	2.04519	2.28253	1.81796	1.71705	1.92617	1.27069	2.03115	1.60932	1.76384	2.73737
15q25	NM_006122	4122	MAN2A2	mannosidase, alpha, class 2A, member 2	0.795133	-0.330732	0.000668616	0.00972515	6.04129	6.85368	5.10007	2.61902	3.6801	4.41859	7.03734	2.34957	5.28361	5.44853	6.04054	5.65669	4.83765	4.26774	3.45943	8.16548	8.578	8.49986	8.19271	7.21501	8.71608	7.88094	4.53114	7.29977	4.74051	5.04839	5.94746	9.94007	8.03356	6.91377	6.84723	7.61541	7.69764	5.07378	5.81453	5.12675	6.99917	8.84633	6.48198	5.01566	5.01755
7q22.1	NM_003302	7205	TRIP6	thyroid hormone receptor interactor 6	1.33614	0.418067	0.000668399	0.00972515	23.2733	32.5109	26.0704	27.1127	18.706	16.2468	14.8677	11.5658	30.5125	11.5847	12.9566	9.1355	9.31855	10.3001	12.5746	3.64929	3.59328	3.67578	14.7538	12.074	15.4477	8.69513	8.85895	7.69635	15.7588	18.9432	21.621	28.7359	24.9187	13.4751	18.4291	15.187	16.336	16.744	16.5842	11.9271	12.2085	10.0389	10.2323	15.5323	16.012
16p12.1	NM_032626	5930	RBBP6	retinoblastoma binding protein 6	0.779022	-0.360263	0.000672052	0.00976089	6.89254	4.9423	3.60275	5.00049	1.72955	2.59032	2.26198	6.15467	4.67098	7.258	6.43054	7.52241	3.85589	4.72074	4.52878	4.63503	4.37104	4.3691	4.21027	3.37877	4.69418	7.77285	6.79782	6.40469	3.19394	3.39949	3.79234	9.18446	8.39847	5.61674	5.14213	4.82071	5.42209	5.16608	4.99489	4.50676	4.99342	6.14348	5.20543	7.31302	7.08516
13q13.3	NM_015678	26960	NBEA	neurobeachin	0.631161	-0.66392	0.000676103	0.00980546	2.89465	5.16533	1.55813	1.95724	3.92219	7.01474	6.70956	10.5845	1.9514	8.06693	7.93317	7.74987	6.81411	7.93525	8.48902	10.5834	12.5883	13.205	6.416	6.45042	5.49333	9.65061	5.69908	10.9374	7.24506	7.01707	8.03595	3.42574	3.23509	3.85251	6.38246	7.39099	7.68451	8.00995	9.04715	9.29209	6.84725	9.19253	8.698	4.13064	4.88652
5p15.2	NM_005885	10299	MARCH6	membrane-associated ring finger (C3HC4) 6, E3 ubiquitin protein ligase	0.788555	-0.342716	0.000682615	0.00988374	9.21448	15.7742	8.87488	8.45038	10.2015	15.1362	9.99884	14.3333	10.2992	11.2931	12.5368	11.9571	11.916	17.5005	18.3077	19.1743	22.6582	21.4059	12.4447	14.5264	12.4314	18.0956	18.4015	21.276	15.9291	16.1392	16.5065	8.57458	8.38927	18.5514	15.3697	17.0839	17.6133	15.994	18.2964	20.8943	14.139	16.6532	15.5646	12.2448	13.7168
2q14.3	NM_139343	274	BIN1	bridging integrator 1	0.592828	-0.754316	0.000683482	0.00988374	8.25323	5.73816	5.03908	4.97567	5.4624	4.73717	13.6888	1.32824	0.551836	7.16748	10.5964	9.17661	3.54138	6.79613	5.32852	20.8657	22.64	22.92	14.0229	12.1254	13.8527	9.38734	9.64676	9.30044	6.87129	8.31107	9.65569	12.7781	11.0792	5.00049	8.71311	10.9809	12.0893	8.0351	9.45972	7.05858	7.4976	10.9974	6.94223	12.7024	11.5941
12p13.2	NM_001987	2120	ETV6	ets variant 6	1.44995	0.536006	0.000688495	0.00991978	1.3361	2.51213	4.33594	2.63679	3.32142	3.39284	1.49312	0.905904	5.10579	1.47148	1.84433	1.32964	3.26492	1.75905	2.0434	1.19727	1.04278	1.25085	2.15955	2.04207	2.21874	2.31025	1.83892	1.68423	1.74004	2.04817	1.88516	1.39915	1.45226	2.13584	2.07746	2.25731	1.84194	2.60134	2.1761	2.4512	1.66656	1.69909	1.54895	1.16769	1.35112
10q25.1	NM_004832	9446	GSTO1	glutathione S-transferase omega 1	1.21001	0.275016	0.000688078	0.00991978	19.5876	18.2754	52.8733	64.6065	40.6494	28.2877	10.3732	23.7128	51.8526	26.9864	29.2365	23.7982	20.2224	21.5527	24.1347	4.02026	4.12352	4.6615	26.5916	22.4498	27.4008	14.9301	15.407	13.4743	24.3399	21.675	22.0159	18.3633	20.8515	14.5169	27.9246	27.3893	24.5132	28.7531	21.7479	21.3853	20.2058	17.699	18.3245	24.5863	15.1303
8q22.2	NM_000989	6156	RPL30	ribosomal protein L30	1.08488	0.11753	0.000688956	0.00991978	1552.55	2022.74	1879.48	1891.69	1852	1387.07	1092.17	1995.59	1448.81	1403.87	1591.94	1496.82	1218.8	1347.74	1346.68	807.917	718.683	703.03	1193.61	1028.6	1138	902.325	1324.63	1022.51	1360.92	1418.23	1433.26	1144.29	1277.26	672.44	1458.04	1371.48	1319.82	1369.33	1329.69	1067.99	1001.23	827.449	908.376	1311.98	1177.08
18q12.1	NM_001792	1000	CDH2	cadherin 2, type 1, N-cadherin (neuronal)	0.807038	-0.309291	0.000692606	0.0099479	16.4801	26.6598	18.4912	19.829	23.6278	32.25	25.2206	35.991	19.3897	26.7159	27.659	21.6938	39.9886	41.9081	51.0894	37.3117	35.4719	36.3622	33.0682	34.9056	29.1433	29.483	30.0243	33.2877	44.5288	39.8078	40.2294	18.9119	16.6001	42.7942	29.3035	33.7273	29.0147	39.2785	41.3024	39.4571	34.7412	33.2659	37.7372	25.6655	24.8927
7q22.1	NM_004444	2050	EPHB4	EPH receptor B4	1.30634	0.385525	0.000692903	0.0099479	23.4276	43.8863	30.4831	25.1726	22.7348	19.7066	11.2637	3.47904	23.0968	10.301	11.7653	8.76214	14.2509	12.0311	12.5246	2.49902	2.07727	2.5695	12.8165	10.7434	13.6852	9.45509	8.77008	8.16121	15.7469	17.6097	20.0976	18.2166	17.621	12.2758	17.0225	14.2378	15.8114	19.6512	14.5638	11.9573	12.0636	8.23785	9.62501	14.2103	14.6365
10q11.21	NM_199168	6387	CXCL12	chemokine (C-X-C motif) ligand 12	1.57729	0.657446	0.000698029	0.0100071	25.7309	14.8369	10.7523	7.62085	13.0812	10.8605	9.38377	7.69767	18.5645	7.40107	7.62189	4.49927	9.71015	12.4801	12.1881	2.00702	2.22226	1.56598	5.83987	4.59332	4.63105	5.21787	3.45864	6.04386	7.90146	7.01031	11.3527	11.446	11.9951	11.2567	10.399	7.57442	9.31015	10.6087	7.59375	7.1986	3.96764	2.87829	3.93758	6.4436	5.12103
5q31.3	NM_001018076	2908	NR3C1	nuclear receptor subfamily 3, group C, member 1 (glucocorticoid receptor)	1.2914	0.368941	0.000699894	0.0100194	1.292	5.82626	5.55649	4.57962	8.0332	7.16041	1.81406	2.68966	7.84753	3.0261	2.54441	2.05282	7.05089	4.43715	6.56893	0.911086	0.7516	0.844241	5.21345	4.91086	6.05694	3.0169	1.54561	3.9159	9.23821	7.33629	6.15749	0.780911	1.74231	5.31627	5.25941	4.9295	3.73679	7.77667	5.38179	7.16677	3.93311	2.18206	3.07411	1.93881	1.06666
2p23.3	NM_001303050	22924	MAPRE3	microtubule-associated protein, RP/EB family, member 3	0.628314	-0.670443	0.000702029	0.0100356	8.58332	6.40691	1.78523	2.83168	2.92473	3.95703	8.55126	3.14759	0.616231	6.31892	4.55124	5.69958	2.53387	6.39431	3.1716	9.58247	11.1778	10.8568	7.35783	4.05385	5.35612	8.87985	8.3416	7.96475	6.54264	7.50823	6.21047	10.7191	10.8631	5.3793	7.16095	7.53946	6.61552	6.79001	9.12114	8.43672	7.78754	12.6683	7.85719	6.52145	8.47563
8p12	NM_001009552	5516	PPP2CB	protein phosphatase 2, catalytic subunit, beta isozyme	0.888943	-0.169837	0.000703047	0.0100358	15.1298	21.8397	30.7888	28.6869	24.375	28.7987	19.9605	28.2797	38.8353	31.7932	35.6623	36.447	24.0982	32.7695	27.6845	41.6525	39.2571	38.6605	26.9428	25.6157	32.3956	30.7849	37.9031	36.0546	28.0228	22.7992	25.8439	23.2449	18.9284	31.3891	27.8438	30.7679	24.7556	28.866	30.1906	33.6779	33.1498	31.3956	34.9923	25.4634	24.2847
1q21.3	NM_005227	1945	EFNA4	ephrin-A4	1.47708	0.562748	0.000713138	0.0101644	10.6318	10.9265	8.14714	8.40115	6.71951	5.60085	6.17064	2.56053	4.74622	4.16831	4.43119	2.89387	5.55109	5.8344	7.02946	1.66209	1.4449	1.34486	3.21306	4.41185	3.54722	3.30421	3.02656	3.31156	5.50326	5.95294	6.92324	4.10642	4.62575	3.89296	4.29014	4.61871	5.41355	4.31836	4.1442	4.45059	3.75209	2.22058	1.3382	4.62009	6.11367
12p13.31	NM_005768	10162	LPCAT3	lysophosphatidylcholine acyltransferase 3	1.42806	0.514057	0.000714093	0.0101644	8.22612	5.85348	11.3869	10.9531	6.4954	6.36564	6.97343	4.25377	12.9925	5.62774	6.34462	4.60388	6.35039	6.39145	5.784	3.06126	2.65543	2.71528	5.49421	5.61657	5.69649	4.55375	3.752	3.01858	5.36054	6.54338	5.58852	7.03387	5.79502	5.03333	5.5564	5.95265	4.90103	6.59091	5.4577	4.90242	4.21883	3.81216	3.28702	4.31564	3.48649
9q34.3	NR_024542	84973	SNHG7	small nucleolar RNA host gene 7 (non-protein coding)	1.12307	0.167452	0.000721542	0.0102558	42.3882	66.883	38.2485	44.1735	50.093	43.0112	31.8047	27.1693	38.7625	25.215	23.6064	21.0962	27.8954	30.6764	28.241	16.5247	11.9196	15.0612	40.52	31.8424	42.1388	18.7129	25.0919	18.1917	38.5244	44.1216	52.9584	43.8063	38.7914	21.6064	33.0217	27.1474	29.3199	42.3608	38.3784	28.4098	27.6592	21.674	24.0427	31.5906	31.0212
2p25.1	NM_003887	8853	ASAP2	ArfGAP with SH3 domain, ankyrin repeat and PH domain 2	0.599573	-0.737992	0.000730701	0.0102979	2.04109	2.73272	1.91687	0.428997	2.14216	1.6378	0.846959	0.000328	4.05771	2.37454	3.1774	5.5403	3.14303	2.80522	3.7209	4.95297	6.78698	6.20456	3.39754	4.78508	3.26911	2.8194	2.48999	2.87213	4.33842	3.8494	1.89912	2.49846	0.464454	3.77666	2.22056	3.81389	5.4212	4.94095	1.99348	2.62199	3.66363	5.82364	2.48036	2.48324	1.00123
Xq28	NM_001395	1852	DUSP9	dual specificity phosphatase 9	2.11376	1.07981	0.000726532	0.0102979	2.83932	2.70999	13.3372	12.1724	3.61888	2.07109	2.50496	1.97145	2.78638	2.45945	2.6646	2.48735	1.91475	2.47136	2.187	1.69769	1.36719	1.79419	2.83099	3.10662	2.75456	1.12198	0.923971	0.766079	1.46065	1.55477	1.92835	1.094	1.90179	1.10247	2.1528	2.25354	2.50087	1.45948	1.39263	1.16412	0.757703	0.476557	0.76804	1.00814	2.4357
7p22.1	NM_006854	11014	KDELR2	KDEL (Lys-Asp-Glu-Leu) endoplasmic reticulum protein retention receptor 2	1.04101	0.0579865	0.000728298	0.0102979	38.3991	81.5474	95.6351	89.7981	92.6724	88.0793	29.5055	46.4034	97.9574	75.3118	78.904	72.2889	71.2355	62.2164	63.1035	26.0469	25.9696	26.4626	56.1568	51.3414	61.2997	45.2917	50.3653	51.367	77.4631	79.7585	70.902	31.387	29.4227	55.2668	80.0725	75.4557	65.2182	75.5412	61.5056	69.0691	47.5325	39.0702	43.1061	45.5204	38.4611
15q13	NM_015154	23184	MESDC2	mesoderm development candidate 2	1.15754	0.211058	0.000730042	0.0102979	3.6358	11.8761	11.1937	7.11095	11.1052	12.1303	4.89224	5.20791	13.4323	6.67202	7.52675	4.95304	11.5635	8.63838	9.46288	5.72005	4.8884	4.48231	7.29159	8.89834	8.85581	4.35366	4.06003	4.90996	9.20956	8.80226	8.39423	4.05382	3.15141	8.75812	7.3381	7.8349	6.36603	9.86246	6.29818	8.10493	7.8193	5.51566	7.56529	4.28954	4.29217
5q13.3	NM_014886	10412	NSA2	NSA2 ribosome biogenesis homolog (S. cerevisiae)	1.09927	0.136551	0.000729233	0.0102979	11.1106	32.7868	40.2244	45.1333	62.9083	61.477	29.3306	47.0896	44.7861	35.2592	29.8278	23.5923	48.8483	40.0908	47.3276	24.374	16.0598	18.4438	40.7642	46.3235	43.119	13.1529	14.8682	18.4723	39.6007	38.3555	40.5594	8.06496	9.4284	15.1023	39.8879	40.7434	35.8812	51.928	41.6795	58.1634	20.4264	14.3431	22.2539	12.2718	11.8386
9q22.31	NM_005392	5253	PHF2	PHD finger protein 2	0.800998	-0.320129	0.000728493	0.0102979	12.241	15.2883	9.91599	5.39705	9.4761	10.4877	8.97062	3.84696	8.13454	9.26599	11.4088	11.9457	9.76625	11.1392	7.12309	14.2883	14.9458	16.6308	12.3731	11.384	13.8056	14.6595	11.3994	11.4147	12.1905	12.2716	11.6102	15.3332	14.3284	12.9047	12.9318	13.9673	12.9023	10.5717	10.938	9.41648	12.6122	15.6793	13.5637	8.36491	10.3102
16p13.2	NM_000303	5373	PMM2	phosphomannomutase 2	1.30391	0.382845	0.000733158	0.010318	3.72363	9.80895	13.4117	12.5874	9.35901	7.68691	5.81005	5.49966	19.7135	12.3483	15.574	12.8824	6.87861	8.61332	7.55091	3.76546	3.96572	3.63747	5.58777	4.82429	5.06777	5.97193	4.25294	5.06995	8.17352	7.6817	7.03169	4.49127	4.19648	4.9728	7.43444	7.20973	7.93394	9.50757	6.56161	6.55497	5.07025	5.13585	5.01324	3.22929	4.38971
12q24.11	NM_207435	400073	C12orf76	chromosome 12 open reading frame 76	0.802226	-0.317919	0.000745396	0.0104754	3.21566	3.50423	3.71739	5.28569	3.23595	4.08868	6.16176	11.5647	4.29068	6.60927	7.29868	7.35911	6.31941	6.87865	6.43151	10.2652	8.74536	7.5717	4.83449	4.61519	4.91185	5.54568	6.68029	7.02539	6.97569	5.08015	6.05893	4.11608	3.26929	9.26925	5.2422	5.84293	4.84108	6.03601	6.0955	6.33335	8.77526	8.26558	8.70317	5.6542	4.57514
1p36.13	NM_001032363	440574	MINOS1	mitochondrial inner membrane organizing system 1	0.838924	-0.253389	0.000752037	0.0105539	1.49792	2.57465	2.06713	3.14846	2.11869	2.57642	1.41097	2.94277	3.17713	3.62493	2.75784	2.2624	2.63267	2.87729	3.09131	3.65157	3.765	3.37563	2.91407	2.96671	3.36972	1.8232	2.00505	2.06019	4.03683	3.55295	3.84203	2.62758	2.36652	3.28404	2.96689	3.36887	2.50448	3.65445	3.25211	3.77769	3.804	3.42294	3.80529	3.3271	3.11452
2q37.3	NM_004321	547	KIF1A	kinesin family member 1A	0.723623	-0.46669	0.000756057	0.0105954	49.7932	39.7955	12.5313	9.5924	14.9132	16.8581	51.8327	11.5579	10.9388	31.6558	34.3545	39.1162	9.11278	33.2375	13.7374	61.4694	60.1846	63.4878	27.0232	23.334	23.9765	48.501	40.0969	42.308	27.124	31.154	36.6774	47.782	42.5676	27.3079	38.5661	50.3725	48.6309	25.9796	36.0802	27.3774	33.7541	47.2383	36.3577	29.6208	31.8908
19p13.11	NM_020959	57719	ANO8	anoctamin 8	0.742409	-0.429714	0.000757349	0.0105986	4.75421	3.96029	1.89787	2.12148	2.09632	1.89507	5.52182	1.48913	2.00853	3.58632	4.05172	4.01973	2.26409	2.83545	1.98674	5.80041	6.78496	7.77253	3.82225	2.73575	3.19129	6.69012	4.29971	4.30597	3.00845	3.17661	3.9749	7.0381	5.04354	3.59701	4.81067	5.06268	6.08095	2.96388	3.99843	2.73118	3.59196	4.70185	3.26554	3.36794	4.41599
17q25.1	NM_004035	51	ACOX1	acyl-CoA oxidase 1, palmitoyl	0.758204	-0.399342	0.00075895	0.0106062	3.47039	5.21712	3.72224	1.44215	3.66042	4.4757	3.83794	5.07989	4.09042	5.36393	7.79644	6.79505	3.9887	4.71046	4.54975	8.07856	7.94379	8.11788	4.81933	4.45914	4.07139	5.66455	4.82487	5.21495	5.56703	4.84644	5.93437	3.84093	2.71215	8.18806	5.56316	7.61367	5.98341	6.23072	5.95752	5.42266	7.16599	7.36166	7.81802	4.27502	3.71464
1q21.3	NM_153649	7170	TPM3	tropomyosin 3	1.14906	0.200451	0.000760197	0.0106087	8.19043	18.0658	33.9828	19.4123	26.4608	26.7205	11.7572	12.7568	56.815	20.0137	22.4954	15.1037	23.8365	28.4163	28.6067	9.62628	8.21552	8.91588	17.9123	18.7133	18.6695	10.2805	9.71573	10.4077	19.6128	17.5945	18.9485	7.74826	7.16701	15.5606	15.7017	14.8838	14.5653	22.7123	15.0039	19.2254	13.7618	10.1461	11.1016	9.97957	8.9305
5q35.3	NR_003615	728554	LOC728554	THO complex 3 pseudogene	0.778943	-0.36041	0.000762906	0.0106168	3.35421	4.50814	7.29451	6.77778	4.76234	5.43691	9.40048	13.2446	8.70962	12.8856	16.1526	14.8187	18.7614	21.8792	20.376	13.0111	13.6641	11.4997	9.40673	8.33607	7.65834	5.6982	6.06309	5.80301	9.1095	7.60988	9.64342	4.96106	5.27462	11.9023	6.57324	7.22985	5.93824	8.84138	7.16158	8.75998	9.93192	9.97279	10.8292	6.93025	6.17834
9q33.3	NM_033446	89853	MVB12B	multivesicular body subunit 12B	0.80294	-0.316635	0.000761926	0.0106168	18.0198	11.558	9.1126	8.43387	8.58019	8.87572	20.5824	10.3118	4.41807	9.56332	10.3312	10.6764	9.27394	12.8479	9.266	24.2132	24.4671	28.1409	10.9017	9.70168	10.7855	18.2459	17.6887	15.2167	10.4381	10.2682	13.9944	19.6564	18.9223	11.8404	11.7568	12.8682	12.4748	12.6719	16.0556	11.0452	12.9529	14.7815	12.488	11.9747	14.8176
2p13.3	NM_022173	7072	TIA1	TIA1 cytotoxic granule-associated RNA binding protein	0.716624	-0.480713	0.000764406	0.0106229	1.98159	5.10636	6.02075	5.76218	6.016	7.63061	3.32387	7.40872	6.34896	6.47188	5.48681	4.63911	12.7201	12.2608	12.4253	8.17827	6.48774	7.42889	5.38984	10.2189	9.19437	11.1532	7.77996	10.9334	11.8852	9.81207	9.41661	6.69758	6.09818	10.3162	8.58154	6.07913	6.50157	10.976	9.06162	11.0988	8.6672	8.35482	7.61536	5.88781	5.05323
18p11.32-p11.31	NM_032048	84034	EMILIN2	elastin microfibril interfacer 2	1.57243	0.652993	0.000765703	0.0106253	1.67394	2.11546	5.68993	3.26824	6.03716	6.45302	1.09906	0.845099	8.18011	2.31991	2.61112	1.45016	6.7054	2.56945	2.99295	0.292374	0.445535	0.42159	5.79399	5.81447	6.09574	2.06203	1.30872	1.55467	3.73098	3.34034	2.9532	0.631037	0.731582	1.1878	3.63229	2.95711	2.49006	5.04899	2.46618	2.97783	1.32922	0.64564	1.01071	1.09373	0.737568
6q22.31	NM_016063	51020	HDDC2	HD domain containing 2	1.10412	0.142899	0.000766709	0.0106253	7.60584	12.916	20.9659	22.6651	17.7242	17.2095	9.0095	19.7569	19.7641	12.6241	14.8606	12.0497	15.673	14.4493	18.2819	8.28602	7.31974	6.55674	14.4825	14.8146	16.3108	7.16498	10.4174	8.70209	16.8908	15.1777	15.2722	7.80382	7.68538	14.3021	15.3059	14.5703	11.5856	17.6406	15.0056	13.9591	14.0029	11.0948	14.7995	12.2411	9.59381
2q33.3	NM_017759	54891	INO80D	INO80 complex subunit D	0.810728	-0.30271	0.000768549	0.010636	0.726546	2.45719	1.68488	1.0894	1.44833	2.42431	1.26766	1.33961	2.45557	2.53494	2.80878	2.45364	2.5224	2.45489	2.5587	2.2093	2.25494	2.24114	2.52369	2.73999	2.17629	3.27504	2.14578	3.19973	1.92134	2.04267	2.08356	1.57361	1.38575	3.05395	2.02438	2.46819	2.57918	2.38288	2.41154	2.9871	2.32763	2.78696	2.42379	1.21598	1.35736
17p13.1	NR_003000	677763	SCARNA21	small Cajal body-specific RNA 21	0.808161	-0.307285	0.000774945	0.0107097	350.315	76.9355	12.2751	114.69	82.9611	92.9658	99.2238	142.64	145.9	503.024	298.427	412.292	55.24	177.569	144.846	271.409	195.512	274.1	86.7852	98.3233	69.766	247.252	186.269	189.699	182.579	180.614	162.253	174.202	216.756	241.591	205.837	111.042	292.732	247.669	177.129	145.641	110.894	79.4663	94.6679	127.586	208.51
2q36.3	NM_152527	151473	SLC16A14	solute carrier family 16, member 14	0.697925	-0.518856	0.000776271	0.0107132	3.45369	4.40142	1.95048	2.17311	3.69148	4.64149	6.8042	9.39503	2.32569	7.69671	7.85535	8.2309	4.13659	7.63506	4.94526	16.6964	16.7969	14.898	4.6755	3.97087	3.90356	7.14938	8.98106	10.1473	5.72858	5.52896	5.50962	3.09795	3.57151	5.42409	5.17686	5.75992	5.28141	4.99085	6.47115	6.4649	6.95781	6.63691	7.05422	4.16621	4.28468
1p32.3	NM_052940	115353	LRRC42	leucine rich repeat containing 42	1.2158	0.281908	0.000778809	0.0107334	7.8674	5.03983	13.5602	13.4175	10.926	11.064	6.40312	9.95672	14.5299	5.45511	6.7187	4.75575	9.71903	11.2405	7.49704	5.19206	5.07252	5.40336	9.71497	8.41432	12.3631	7.15163	6.30746	8.6664	7.45416	5.9858	6.27494	3.41391	5.4003	5.46249	9.57369	9.99529	6.956	9.6727	9.1696	11.6373	7.32659	5.6226	7.43519	3.34461	5.51368
2q37.1	NM_005737	10123	ARL4C	ADP-ribosylation factor-like 4C	0.744946	-0.424792	0.000782729	0.0107725	8.71732	11.7904	9.70628	5.65125	9.36373	12.8205	8.50843	6.54233	10.773	6.36678	8.67082	6.20419	10.2661	8.25698	11.6128	26.9332	26.1849	25.5988	11.5379	12.6079	15.2409	11.2086	9.58398	14.7557	21.0607	15.4462	15.6294	22.8421	14.8604	32.2143	14.5249	15.3781	11.8513	21.6418	15.7373	17.4895	32.1139	27.2051	31.5801	10.9657	8.67704
18q11.2	NM_138340	171586	ABHD3	abhydrolase domain containing 3	0.762704	-0.390804	0.000785811	0.0108	1.72888	1.49753	2.81454	2.82448	2.29404	2.61238	2.16053	2.06328	3.40492	3.40992	3.32689	3.8679	3.6649	2.73114	2.68417	3.09538	2.77277	2.89262	2.93844	2.77604	3.0005	3.89397	3.49246	3.23362	2.74855	2.55126	2.60443	3.37841	2.5496	5.785	3.08606	3.94235	3.38058	3.23022	3.35729	3.41085	4.94637	4.66828	5.0493	3.70275	2.94246
3p14.3	NM_015576	26059	ERC2	ELKS/RAB6-interacting/CAST family member 2	0.714506	-0.484982	0.000790789	0.0108024	1.17265	1.26993	0.554006	0.454543	1.15413	1.89032	2.49901	2.63821	0.578659	1.75485	1.78362	1.59262	2.21461	2.53225	1.78525	6.19407	7.05963	7.44333	1.7455	2.00063	1.61147	2.85216	2.24982	2.79036	2.56014	2.20559	2.65587	1.07727	0.978588	1.07811	2.0072	2.24358	1.87886	1.95878	3.08581	3.25427	2.33394	3.20873	2.80085	1.69503	1.73665
2p22.1	NM_138801	130589	GALM	galactose mutarotase (aldose 1-epimerase)	1.31058	0.390204	0.000791374	0.0108024	2.08028	3.2709	12.9849	5.1451	7.94179	6.37217	2.20259	3.1882	6.52958	2.47749	3.69571	3.19652	6.21625	4.45307	4.66784	1.57348	1.63788	1.16425	5.26482	5.33981	5.63693	2.54347	1.47175	2.09543	4.09694	3.62605	3.97626	1.75191	2.8172	4.47762	4.9984	4.4927	4.45379	5.46503	4.03326	3.92406	3.91038	3.43451	4.34551	2.42348	2.46994
11q13.4	NM_173582	283209	PGM2L1	phosphoglucomutase 2-like 1	0.632625	-0.660577	0.000787893	0.0108024	3.63709	3.8346	1.52118	1.66462	3.73923	6.73843	5.55597	10.5524	1.42768	5.14985	5.16453	4.66681	6.25109	9.69997	6.50525	18.565	19.6366	17.8393	3.1531	3.16037	2.77225	7.69184	8.80171	10.4788	7.17358	5.88094	7.05826	4.24461	4.39896	5.7136	5.51121	6.44032	5.61061	5.32078	9.06843	8.56275	6.36211	7.60587	8.59588	4.49738	4.53262
3p25.3	NR_027007	440944	SETD5-AS1	SETD5 antisense RNA 1	0.794797	-0.331341	0.00079015	0.0108024	1.02999	1.81782	1.53485	1.88294	1.47285	1.77722	2.15753	4.62252	1.82071	4.60003	4.08036	3.81005	2.95109	4.6719	3.63921	3.11084	3.77885	3.21083	2.64122	2.37182	1.93534	2.99824	2.85095	3.27634	2.92594	2.10075	2.3874	1.85325	1.53102	2.95566	2.51957	2.53708	2.5989	2.21765	2.56128	3.12123	2.53212	2.20999	2.28563	2.19232	1.35646
8q21.13	NM_001033723	619279	ZNF704	zinc finger protein 704	0.789123	-0.341678	0.000791396	0.0108024	2.2644	4.6504	2.86766	1.89466	3.37145	5.6017	3.14871	2.88431	2.69652	3.30496	4.66159	3.20807	5.25059	5.22346	5.64737	6.97041	7.26077	6.66403	4.91501	5.33964	4.09789	5.47788	3.96248	5.40832	5.85325	4.58394	4.69055	2.70888	2.6139	5.48015	4.20477	4.68147	4.62029	4.6913	4.69877	4.82713	3.70232	3.6983	4.1431	2.25066	2.59269
2q11.2	NM_198461	164832	LONRF2	LON peptidase N-terminal domain and ring finger 2	0.697956	-0.518793	0.000793489	0.0108162	1.00827	1.34334	0.3545	0.206467	0.820334	1.57829	2.04183	1.63046	0.261849	2.74798	3.82127	3.34633	1.34549	1.48029	1.18823	6.12269	7.47111	7.98785	0.883377	1.08327	0.779137	3.33702	2.34812	3.08968	1.63795	1.54104	1.70872	1.00251	0.916689	1.69463	1.29082	1.76245	1.73219	1.38383	1.79078	1.97806	2.12555	3.24741	2.59238	0.919415	1.25449
15q26.1	NM_003870	8826	IQGAP1	IQ motif containing GTPase activating protein 1	1.16241	0.217113	0.000798557	0.0108383	4.41042	14.5088	22.5248	10.0824	19.2829	21.7674	7.23626	9.32036	64.2565	14.4991	15.4725	8.67843	22.4088	11.7516	22.0591	4.39342	4.47709	4.65215	16.92	17.4093	18.2998	8.19331	5.92956	9.32207	21.29	20.0394	18.3866	4.77694	4.34477	7.82638	13.9116	13.5061	12.2756	23.2286	15.7252	17.7016	9.55166	7.40025	8.49366	5.76358	5.15439
17q11.2	NM_033389	85464	SSH2	slingshot protein phosphatase 2	0.727414	-0.459152	0.000798553	0.0108383	0.513038	1.30561	0.759023	0.375674	0.91962	1.58085	2.13652	1.95701	1.64667	1.25146	2.2597	1.75089	1.74765	2.42952	2.88646	3.55266	3.82682	4.2993	2.65525	2.99768	2.38217	3.66345	1.15393	3.15006	1.83908	1.31164	1.83632	0.942757	1.2821	2.28459	2.25538	2.492	2.11561	1.61181	1.55078	3.5651	1.4289	2.11255	1.76111	0.950827	0.895396
13q14.13	NM_003295	7178	TPT1	tumor protein, translationally-controlled 1	1.05494	0.077155	0.000799455	0.0108383	107.324	363.08	486.499	618.757	412.61	348.794	135.598	369.759	362.357	242.863	268.409	239.539	315.746	280.97	313.816	124.147	114.681	99.1965	268.339	287.534	320.401	104.523	175.304	181.642	323.416	269.121	259.542	77.4387	89.0567	189.682	278.466	255.078	202.42	288.927	232.931	326.032	214.264	123.743	216.071	210.764	120.078
Xp11.3	NM_004651	8237	USP11	ubiquitin specific peptidase 11	0.85811	-0.220766	0.000799284	0.0108383	101.381	48.2351	38.1399	21.743	30.8124	28.9339	87.3974	43.5469	30.4225	67.4739	74.5388	85.0884	25.8227	48.0849	37.8901	90.9322	99.5998	104.473	37.2163	31.8949	35.3333	44.3823	49.187	40.087	39.593	40.7911	46.5061	46.6214	53.716	36.519	44.0393	47.9458	47.5307	53.6888	57.2492	45.2739	67.2644	80.3356	63.1768	71.4091	72.1741
12q24.11	NM_170665	488	ATP2A2	ATPase, Ca++ transporting, cardiac muscle, slow twitch 2	0.816577	-0.29234	0.000806938	0.0108551	6.33315	12.118	10.2106	7.07212	7.81133	13.4226	7.56795	6.18477	14.1741	9.8736	13.416	10.1732	15.7175	13.4054	14.6665	14.2739	13.4626	15.1356	12.719	13.3008	12.5444	11.2831	7.44685	12.4498	13.0766	11.9344	11.8092	7.75899	6.37077	15.275	11.944	13.9775	13.2635	15.2701	12.8689	13.935	14.3034	15.648	15.779	7.38474	7.11859
1p31.3	NM_181712	163782	KANK4	KN motif and ankyrin repeat domains 4	1.76469	0.819412	0.000802726	0.0108551	3.81965	2.42223	15.7262	9.93894	8.46703	7.12801	2.24108	1.41314	15.3376	3.60886	4.61707	3.38707	7.32991	2.77422	3.84542	0.443507	0.405164	0.249699	2.77858	3.24037	3.40348	2.60419	1.45644	2.11875	6.94951	7.05917	5.33198	2.75329	2.62413	4.311	4.96765	3.67022	3.55693	7.45817	4.43132	4.11508	2.12744	0.906432	1.36098	1.52033	1.40375
15q14	NM_153613	254531	LPCAT4	lysophosphatidylcholine acyltransferase 4	0.854802	-0.226338	0.000803376	0.0108551	10.0571	10.2436	6.70506	6.71509	5.28956	6.22998	9.34763	5.00915	6.99793	8.01903	9.82338	10.3165	5.52133	5.72051	5.48872	12.2248	14.3726	13.4471	11.7367	9.43136	11.3585	9.31111	6.11433	8.51962	6.91839	7.60221	8.93187	13.5553	11.9928	7.3335	10.4278	8.68116	10.2541	7.49164	6.99113	6.59062	9.73533	11.745	10.179	7.71517	9.83854
3p13	NM_015009	23024	PDZRN3	PDZ domain containing ring finger 3	1.3867	0.471653	0.000807355	0.0108551	6.99855	7.57457	12.3283	8.11886	10.263	9.00807	4.27286	1.56014	13.3687	2.59191	3.19307	2.78444	4.54713	4.99424	6.88932	1.54109	1.52727	1.74843	6.17932	7.38174	8.32833	4.22031	3.04029	3.85785	10.1422	9.13736	7.79279	4.24012	3.79092	6.93695	7.25631	6.3439	6.72843	9.56431	5.72664	4.51845	7.15491	4.04851	6.43597	3.2814	3.62191
9q34.3	NM_181701	169714	QSOX2	quiescin Q6 sulfhydryl oxidase 2	0.834146	-0.261628	0.000805508	0.0108551	3.2394	5.15801	4.42749	3.51185	3.83327	3.97033	3.16149	1.79778	4.17695	4.43601	5.61558	5.79462	5.65986	6.80086	3.22808	4.95495	5.72213	5.45087	6.07087	5.07309	5.14766	4.96156	4.01616	4.33941	5.03363	4.33293	4.59943	4.22405	3.61116	5.14586	4.30614	5.22431	4.28864	5.37311	4.15456	4.57751	4.73285	5.94438	4.65779	3.49902	3.14518
Xp22.12	NR_023358	100158262	SCARNA9L	small Cajal body-specific RNA 9-like	0.77803	-0.362103	0.000807678	0.0108551	10.4313	2.61216	8.63015	11.9073	5.58886	3.27038	8.07549	7.83758	11.2261	10.9229	13.3729	13.0313	15.0834	12.358	17.807	10.1041	11.7857	7.30832	8.87032	10.8524	9.99268	6.13232	4.56493	5.24595	7.50309	8.92342	10.1198	9.04299	6.65402	9.28305	8.04514	6.60295	8.48838	6.73266	7.70268	10.9579	7.75969	13.0699	9.25323	10.148	10.8818
9q34.3	NM_032928	85014	TMEM141	transmembrane protein 141	1.15544	0.208444	0.0008094	0.0108551	41.1502	35.9768	106.053	130.591	72.4093	44.0132	32.0334	36.5896	58.4444	47.8421	43.1413	27.7383	39.919	42.1456	41.9103	12.2194	11.3032	11.6258	43.1056	36.7366	44.3862	22.7247	26.6039	20.2106	55.1361	56.6256	71.1419	47.3768	49.8412	22.6345	47.3642	39.5564	36.4426	64.0599	55.9685	38.4088	26.9205	17.6233	18.1095	33.9002	35.7739
19q13.32	NM_003370	7408	VASP	vasodilator-stimulated phosphoprotein	1.28985	0.367207	0.000808487	0.0108551	14.665	15.7599	26.1507	22.9611	14.5116	13.0687	9.50243	5.05809	31.2225	10.9114	12.1903	10.0129	12.5635	9.95404	9.41522	4.41378	3.94461	3.99395	14.5589	11.0178	13.3807	8.34878	7.17847	6.93799	9.38119	11.2346	13.4884	12.604	12.5861	7.10612	12.248	10.1203	10.5749	13.4425	11.1491	9.73865	9.85519	6.78016	7.97235	9.04161	9.87465
1q23.3	NM_007122	7391	USF1	upstream transcription factor 1	0.869803	-0.201239	0.000813916	0.010901	17.9989	14.232	10.7296	7.61699	13.7208	13.758	19.2608	13.7449	14.2252	11.5687	15.4299	18.7421	14.5031	17.9781	12.9042	19.4176	22.6383	21.8297	14.9239	12.2295	14.8226	17.9707	19.1126	16.1871	15.041	18.7822	15.9032	20.9043	19.0456	10.2996	13.5369	15.979	15.4653	15.2754	16.2433	12.8327	16.3691	16.3292	15.9676	19.8428	23.0924
3p25.3	NM_001033117	9901	SRGAP3	SLIT-ROBO Rho GTPase activating protein 3	0.584693	-0.774249	0.000827254	0.0110648	3.56413	2.82616	0.431583	0.168852	1.78857	2.89676	2.89437	1.70612	3.2e-05	2.6649	3.7644	3.83014	2.86618	5.75356	2.32547	6.5894	8.93266	9.12332	2.687	1.66483	0.910552	6.07555	5.63101	4.95355	2.87216	2.87512	4.92087	2.21427	2.28957	2.41445	2.47239	4.34647	2.2935	2.62582	3.34343	4.03634	4.11719	4.77656	3.1277	2.30471	1.79326
7p11.2	NM_001284283	81552	VOPP1	vesicular, overexpressed in cancer, prosurvival protein 1	0.777599	-0.362903	0.000831061	0.0111008	11.3867	7.67535	9.54557	8.11812	7.35419	13.6784	14.4511	11.2427	10.8966	13.8151	21.4074	19.601	10.6565	18.7385	12.8183	34.6116	35.0139	27.9644	14.5453	11.4582	8.86964	16.1121	23.1191	16.7322	16.0388	11.8455	14.484	7.66302	8.58826	11.7226	11.2215	14.6695	10.2921	13.3644	13.5181	14.7632	19.5521	13.2411	21.6918	10.4603	5.67342
9p13.3	NM_147202	203259	FAM219A	family with sequence similarity 219, member A	0.786614	-0.346271	0.000833273	0.0111073	11.8273	5.35783	3.45202	2.95964	4.63599	4.52228	11.4807	4.49672	3.50845	6.16031	8.88119	9.75357	4.44824	8.61758	5.73201	14.2148	15.7884	17.5646	6.34491	4.74356	6.6132	11.7948	11.473	9.9726	6.38603	8.29994	3.32919	7.78024	8.89501	4.5385	5.29098	7.61325	4.88253	6.50741	5.72562	7.76057	5.55784	6.66116	5.4231	6.18554	5.37571
2p23.3	NM_017727	54867	TMEM214	transmembrane protein 214	1.3853	0.470203	0.000833772	0.0111073	15.6645	19.8985	21.8232	18.0611	15.3215	13.2202	10.3581	6.36507	23.393	10.4792	9.82184	9.56116	7.20141	9.06581	9.87318	3.63694	3.39138	4.64411	8.91922	8.79874	8.50985	7.44905	7.46953	7.68422	12.7769	13.8253	14.011	16.6385	15.4206	11.0909	12.9224	12.5432	12.4204	14.9414	11.4466	9.70404	7.82854	6.61049	6.86605	6.40921	8.11059
15q14	NM_024713	79768	KATNBL1	katanin p80 subunit B-like 1	0.795963	-0.329227	0.000836077	0.0111232	2.63311	6.0417	4.7104	5.07152	3.83826	5.93393	4.03189	9.30671	6.9335	7.40736	7.23329	7.69839	6.27167	9.73638	6.16761	9.56804	9.2397	8.18606	4.20231	5.25855	5.73406	7.62266	9.99991	9.27515	7.83099	6.66417	6.61309	4.35065	4.28258	6.83962	8.34383	8.2187	7.43247	6.08626	6.3198	7.89316	8.05978	6.69323	8.05126	7.48148	5.06266
1p32.3	NM_002867	5865	RAB3B	RAB3B, member RAS oncogene family	0.752156	-0.410895	0.000839112	0.0111487	2.27221	2.27138	2.66664	1.6063	2.34396	3.56492	3.26248	2.20717	2.1084	2.43088	3.18396	2.5062	2.94617	2.29751	3.776	7.70634	8.89506	8.77524	5.94787	5.5184	5.14656	4.89184	3.27788	4.57409	2.64333	2.40318	2.68736	2.69699	2.37555	5.06825	3.98317	4.83369	4.3218	4.23058	5.07617	4.56041	3.56986	4.41879	3.57058	1.46364	2.11353
1p34.1	NM_020883	57643	ZSWIM5	zinc finger, SWIM-type containing 5	0.816919	-0.291735	0.000843573	0.0111931	2.27021	1.53111	1.31141	0.840517	1.63411	2.1777	3.33558	3.2599	0.272046	1.76833	2.21324	2.35719	2.10964	2.61895	2.13893	5.09192	4.58533	5.11127	2.84604	2.90917	2.89363	3.78683	3.46297	2.89448	2.04106	2.1715	2.30893	2.15123	2.12123	2.97199	1.71759	2.18267	1.83251	2.11918	3.20945	2.06911	2.19461	2.55189	2.1169	1.84318	1.80384
10q24.2	NM_031484	83742	MARVELD1	MARVEL domain containing 1	1.40454	0.490102	0.000848137	0.0112262	24.1716	37.3728	24.3223	23.1052	17.1031	13.7429	9.6568	4.81258	24.7532	11.2954	10.7857	8.84525	12.5145	11.2576	11.197	2.42016	2.08664	2.60488	9.98617	10.1263	11.9184	8.09552	6.76947	6.04316	17.5744	18.8855	19.8308	19.1361	17.2019	11.7409	16.5609	13.5028	13.7324	18.9925	12.9765	10.0145	8.77149	6.61669	7.20694	8.44818	7.99992
14q22.1	NM_145251	6815	STYX	serine/threonine/tyrosine interacting protein	0.825779	-0.276173	0.000848323	0.0112262	1.6771	2.67556	4.02675	3.10352	2.12669	3.55286	2.06027	2.75042	4.52608	4.1322	4.73353	3.54603	4.42416	5.26718	4.32355	5.47341	5.09992	4.68638	3.08269	3.79528	3.63332	2.75917	3.2553	4.05397	4.31647	3.62545	3.66701	2.56859	1.96455	4.9519	3.47117	4.2465	4.47044	3.69091	3.5369	4.73493	4.7813	2.91861	4.28456	1.59193	2.7839
6p21.1	NM_018426	55362	TMEM63B	transmembrane protein 63B	0.848542	-0.236943	0.000850148	0.0112355	22.976	13.221	14.8569	11.21	14.0563	12.6288	18.3096	10.004	10.6307	13.5248	14.1416	14.4047	13.6749	12.2447	10.529	24.8039	26.2864	28.3648	15.8597	13.8769	16.3463	16.9272	15.3653	15.4028	17.8463	18.8336	19.9866	28.3179	25.5695	17.9271	17.8654	17.0154	16.3738	18.4035	18.7363	12.9906	24.9379	25.5451	24.2708	16.2362	16.9595
22q13.1	NM_000026	158	ADSL	adenylosuccinate lyase	1.09486	0.130746	0.000854736	0.0112626	11.8647	24.0308	32.8359	31.3521	29.7528	24.8948	20.5491	38.3163	32.3384	19.008	25.2595	15.4412	24.5951	31.2591	30.988	16.355	16.7275	14.0384	24.0246	19.2163	21.816	15.002	18.3095	14.0491	27.4822	23.6187	26.0568	11.0869	10.152	23.2323	22.7598	25.5396	18.2814	25.7065	21.0517	20.7121	18.5063	17.6428	22.4625	11.2837	11.2082
4q31.23	NM_024605	79658	ARHGAP10	Rho GTPase activating protein 10	1.57712	0.65729	0.000856154	0.0112626	2.03138	2.48556	6.28913	6.69712	5.21973	4.74351	2.19019	2.2469	16.9255	2.72637	4.37427	2.27848	5.4546	2.80269	4.02429	0.747575	0.470765	0.526371	4.02966	4.51415	4.22144	1.72027	1.09493	1.53933	6.00875	5.08769	3.88791	1.564	1.72555	3.17992	3.69471	3.89465	2.89653	5.04506	3.78642	4.82526	2.04511	0.840017	1.6256	1.92155	1.80002
12q24.31	NM_025140	80212	CCDC92	coiled-coil domain containing 92	0.849722	-0.234938	0.000853987	0.0112626	7.16265	7.95918	11.2384	7.63876	5.14926	6.20497	5.71654	2.33749	8.30481	6.59569	8.7521	7.81675	10.7204	7.80245	6.84396	9.95543	9.72743	10.5999	10.2796	8.80716	9.65045	8.22863	5.59304	5.86984	7.50422	7.02782	8.59627	12.1383	10.0363	8.56041	8.35746	9.32643	7.22815	8.14133	6.62232	5.94235	8.7724	8.39303	8.64023	6.59687	6.6561
11q13.2	NM_020470	10897	YIF1A	Yip1 interacting factor homolog A (S. cerevisiae)	1.11126	0.152195	0.000856712	0.0112626	67.5974	62.5288	57.3918	66.7371	47.4175	36.0338	59.1928	33.3184	76.301	38.7239	46.8761	42.052	34.3313	53.7037	48.8459	21.4585	18.8311	21.281	33.3211	27.3284	30.6534	24.6411	29.9591	25.5149	40.8476	49.0893	55.4634	41.8713	42.0348	20.3623	57.7991	60.4686	57.9283	54.0234	48.2686	36.4888	33.3745	31.5725	34.5703	52.2049	48.397
17q21.31	NM_001466	2535	FZD2	frizzled family receptor 2	1.2663	0.340617	0.000860171	0.0112931	15.0823	32.8211	18.7318	19.5646	15.1625	12.9035	6.84509	3.92392	15.6025	10.6488	10.6149	9.60394	10.5066	8.20218	10.7725	1.4669	1.58631	1.86871	12.083	10.596	13.2191	4.73398	5.35357	4.05633	13.945	15.5257	17.2726	10.5849	9.93197	7.93695	15.5562	13.2718	12.4597	15.1209	12.202	10.9632	8.55474	6.63291	7.19949	9.54668	7.72194
Xq26.2-q26.3	NM_000194	3251	HPRT1	hypoxanthine phosphoribosyltransferase 1	0.710202	-0.493698	0.000865503	0.0113232	2.84638	5.18506	3.31297	4.86696	3.16647	3.15663	2.2118	4.74349	2.46911	8.58084	7.63441	6.53194	3.43589	6.59958	5.59363	10.3719	10.0314	10.8541	4.12949	3.89336	5.15531	3.36864	5.83915	4.24952	4.34625	5.97798	5.0361	2.35328	2.40907	3.59397	4.88458	4.45822	3.67359	6.59019	7.996	6.8938	6.42762	6.45422	6.78448	6.36319	5.60997
11q23.1	NM_006169	4837	NNMT	nicotinamide N-methyltransferase	1.95238	0.965231	0.000866121	0.0113232	1.48184	3.41156	9.28744	6.65236	4.34246	2.88369	0.54836	0.791928	8.58077	7.38701	7.49501	5.06243	0.615629	0.282016	0.579345	0.15293	0.031037	0.173398	0.974478	1.26419	1.54751	0.980247	1.13897	0.372035	2.80892	2.31357	2.34685	0.971995	1.28947	0.59066	3.23259	2.70479	3.07231	5.97163	3.01982	2.21483	1.42254	0.52258	0.576633	1.33709	0.742871
11p11.2	NM_175732	114971	PTPMT1	protein tyrosine phosphatase, mitochondrial 1	1.4391	0.525168	0.000864307	0.0113232	6.27715	7.2879	6.20649	7.65183	6.22504	5.09898	4.59113	7.94127	6.35094	5.2793	4.78422	3.99465	3.20829	4.66421	3.85366	2.34422	2.11112	2.31904	6.10582	5.81234	7.14268	3.3906	3.35322	3.05045	4.59377	4.47698	5.01686	5.48003	5.1758	4.05182	4.80009	4.43217	4.12432	4.63899	4.71772	2.51753	5.01541	3.59133	5.03815	4.06205	3.13236
7p21.1	NM_000474	7291	TWIST1	twist family bHLH transcription factor 1	1.72637	0.787744	0.000866996	0.0113232	6.37156	17.0565	7.44188	7.27284	9.54346	7.64578	2.95098	1.78938	3.42684	1.91035	2.22485	1.56053	5.90413	6.1836	4.19459	0.201554	0.116885	0.097959	2.61481	1.72577	2.18528	3.61505	3.83634	2.21872	4.52247	5.36695	6.47793	5.9271	5.74426	3.80727	5.02806	3.81955	4.69496	9.09226	5.40786	3.70787	1.51817	1.01913	1.71956	4.22758	4.32904
10q25.3	NM_020940	57700	FAM160B1	family with sequence similarity 160, member B1	0.80526	-0.312473	0.00088201	0.0114776	1.71455	5.38461	3.96793	2.99504	3.39813	4.93399	1.93019	3.01256	6.4414	5.23977	5.02851	4.76716	4.78828	5.30431	6.20337	5.18729	5.27558	5.57981	4.10282	4.69621	4.60004	4.63647	4.46028	6.50328	4.96017	4.3645	5.18939	2.92901	2.82982	5.89363	4.50996	4.74957	4.54261	5.88583	5.49179	6.05915	5.57876	4.44583	4.53094	3.33174	3.01737
2q21.2-q21.3	NM_002410	4249	MGAT5	mannosyl (alpha-1,6-)-glycoprotein beta-1,6-N-acetyl-glucosaminyltransferase	0.81291	-0.298833	0.000882524	0.0114776	5.45506	7.99163	4.1738	3.33847	6.99651	10.2065	7.1428	7.62483	5.68009	5.30548	6.52881	5.49426	7.39407	5.51372	6.96095	22.8613	23.2452	24.1661	8.22993	7.57575	7.72804	9.18579	6.25606	8.41449	11.4629	9.39049	8.73581	7.59665	6.29661	14.7952	5.99151	6.79083	6.61467	10.6264	10.5281	9.56167	7.21915	8.16186	8.02974	4.8339	5.9498
12q23.2	NM_024057	79023	NUP37	nucleoporin 37kDa	1.13785	0.186306	0.00088298	0.0114776	3.95477	7.98281	11.0021	18.0299	10.7201	9.50044	6.26393	13.5488	17.9487	9.66854	12.6765	8.15319	13.2245	12.6783	14.848	4.73685	4.42441	3.153	6.68021	9.35573	9.23741	4.21143	5.10876	6.83996	11.0057	9.7679	11.0796	2.6376	3.63199	7.15397	9.54336	9.5918	8.46508	12.7303	10.3354	10.6108	9.32352	6.08172	10.6838	5.62878	5.53544
1q44	NM_017865	55657	ZNF692	zinc finger protein 692	0.804678	-0.313517	0.00088342	0.0114776	5.57722	5.66838	4.0608	4.2694	3.63683	2.71686	4.64858	3.9087	4.46802	4.20318	3.64479	5.19498	3.52156	4.81507	3.29583	9.53414	8.40456	8.83434	6.15094	5.65319	4.54903	7.48266	3.55431	6.288	5.10315	5.23058	7.03066	11.8102	8.97603	4.75568	6.72084	6.29969	8.92731	5.1995	5.41807	3.86944	6.61134	8.24982	7.11881	5.47819	8.58918
19q13.12	NM_015526	25999	CLIP3	CAP-GLY domain containing linker protein 3	0.767614	-0.381546	0.000888745	0.0115175	24.2186	25.1876	13.2263	11.8099	6.60097	9.68811	15.402	6.51039	6.97177	16.683	15.328	18.3984	9.44344	13.2169	11.725	16.7434	17.3153	18.4877	19.6226	16.4665	19.2115	19.0012	20.2012	19.3909	12.7338	15.598	19.011	27.1541	23.5185	15.47	20.977	24.3571	25.6591	15.9277	16.9576	17.7929	13.3792	17.9488	12.0547	12.1078	15.9965
11q24.1	NM_024769	79827	CLMP	CXADR-like membrane protein	1.39692	0.482253	0.000889955	0.0115175	3.03393	12.3668	12.6791	6.91839	13.6398	13.6706	6.35042	5.63309	17.705	9.23077	10.2788	8.88957	9.00003	5.11378	5.89461	7.10166	6.82017	5.41508	8.27588	8.17606	11.5593	4.24486	4.25342	4.48778	13.1021	9.63734	9.00578	1.54137	1.76646	5.7885	7.65789	5.83839	5.00566	9.07451	8.13723	8.59776	2.72438	1.90583	3.42447	2.362	2.10968
1p32.3	NM_174936	255738	PCSK9	proprotein convertase subtilisin/kexin type 9	1.69319	0.759743	0.000889285	0.0115175	5.30659	6.85038	2.58613	2.95034	2.17521	2.04186	4.54571	2.0538	0.310862	1.60061	1.18725	1.35387	1.16578	2.06259	1.56806	0.731607	0.644102	0.400488	1.03024	0.832192	0.958113	1.63187	1.54145	1.5454	1.94204	1.63935	2.17179	0.922786	0.92922	0.763905	3.23764	3.95553	4.83149	1.93639	1.20895	0.805069	1.53464	1.48948	1.6532	2.54343	3.74442
8q24.3	NM_017444	54108	CHRAC1	chromatin accessibility complex 1	1.3802	0.464879	0.000894186	0.0115572	2.74883	4.45887	7.77214	5.14509	6.29496	4.1856	2.18288	1.45946	6.6203	3.62382	4.95092	3.69125	5.00697	5.34293	4.64336	1.32188	1.0554	0.971111	2.65359	3.33315	3.95906	2.37473	2.13384	2.07259	4.013	4.19408	3.8789	2.1793	1.54404	3.31107	2.74585	3.91111	4.33107	4.02059	3.1942	2.57709	3.04912	2.69622	2.22788	2.63211	2.81313
7q36.1	NM_001281300	116988	AGAP3	ArfGAP with GTPase domain, ankyrin repeat and PH domain 3	0.773362	-0.370785	0.000895552	0.0115599	8.43532	7.38374	4.92403	4.53367	4.99796	5.0352	9.35133	3.78774	3.66886	7.27907	9.45615	11.965	3.83818	6.50256	4.46428	11.6149	12.0685	13.5123	6.61249	6.48022	8.51078	8.81147	8.48933	7.51292	7.3102	7.23778	7.56436	11.9043	12.4679	4.85002	8.08882	7.24906	8.40685	5.70032	7.12732	6.60476	8.94155	9.46623	8.67206	8.56117	10.8624
19q13.42	NM_138373	91663	MYADM	myeloid-associated differentiation marker	1.71283	0.776385	0.000906191	0.0116821	5.95869	17.4157	21.7526	12.4125	8.54134	8.4352	4.17591	2.01574	16.061	8.77063	10.4319	6.91808	8.33855	2.82539	3.6068	0.923745	0.72099	0.602695	5.63757	6.70165	5.11663	3.33965	2.18507	2.255	7.25708	7.80498	6.61201	6.73832	5.5518	4.71731	4.90364	5.77698	3.64297	7.11382	6.35076	4.69722	4.29465	2.72835	3.55737	2.76786	4.18483
17q22	NM_182569	284161	GDPD1	glycerophosphodiester phosphodiesterase domain containing 1	0.740634	-0.433168	0.000910332	0.0117204	1.93825	2.53363	1.28545	1.81425	1.48649	1.95269	3.25172	4.51764	0.660028	2.58833	2.23635	2.44994	2.33502	3.5468	2.12112	5.76642	5.18482	4.81866	2.59676	2.84195	2.82688	3.0819	5.136	3.77301	2.19541	2.46153	3.18312	2.71001	1.6926	2.51349	3.15455	3.77718	3.23998	2.51046	3.72831	3.03032	3.43481	3.67197	3.90817	3.47824	3.43916
13q32.1	NM_006260	5611	DNAJC3	DnaJ (Hsp40) homolog, subfamily C, member 3	1.17064	0.227302	0.000923054	0.0118689	2.33394	14.9116	9.11957	8.73854	11.2425	13.6958	4.32664	8.71374	16.2238	9.0638	7.77775	6.14148	11.5356	9.55865	10.8362	6.53277	5.94984	5.43239	6.63535	7.18674	7.44922	4.33633	3.80236	6.66583	9.81114	8.50948	8.04743	2.61089	2.4632	5.2756	8.29785	7.79327	7.39392	10.855	8.62492	11.3912	8.25683	6.00575	8.27111	3.95252	4.11079
12q13.13	NM_004302	91	ACVR1B	activin A receptor, type IB	0.834123	-0.261667	0.000939544	0.0120653	6.89096	5.72458	7.72776	4.80796	6.81219	7.40043	7.22704	4.02342	3.86967	7.05031	9.50753	9.61735	8.40544	9.57584	5.67726	14.8671	14.9359	14.1702	8.87915	6.55581	7.93076	9.73118	7.27344	8.23168	8.27728	7.41881	6.2714	6.61769	6.39413	7.2816	6.92603	7.54657	7.29629	6.53869	7.80967	6.50733	6.95476	7.87794	6.98227	4.59522	4.57301
22q12.3	NM_002133	3162	HMOX1	heme oxygenase (decycling) 1	1.56976	0.650548	0.000942484	0.0120875	2.79186	6.26647	11.6084	10.1819	5.42764	5.89512	3.49569	2.51287	15.8309	3.35302	3.62452	3.06522	4.57834	1.91761	2.56295	2.00169	1.53882	2.13209	3.62359	3.25927	4.48233	3.40209	3.12764	2.58242	3.70141	3.80981	3.82588	4.9569	4.86876	3.33398	4.94747	3.57604	4.45933	7.26303	4.71272	3.02599	3.94974	3.96043	4.09795	2.65184	3.95957
Xq22.2	NM_032621	84707	BEX2	brain expressed X-linked 2	0.747043	-0.420736	0.000943961	0.0120909	10.7166	16.8532	15.6535	15.8738	16.085	19.0673	30.013	72.551	24.0386	52.4753	56.2497	56.4896	29.1149	48.0446	32.2099	66.0959	64.3661	56.2374	30.9077	29.647	29.4263	19.8598	32.4329	32.3573	40.5666	34.9267	36.6086	10.7634	11.7908	19.2201	24.7516	31.679	19.3427	28.0114	30.3936	30.1855	40.6765	44.6103	50.2422	45.8583	36.9136
3q27.2	NM_080652	90407	TMEM41A	transmembrane protein 41A	1.23083	0.299635	0.000947859	0.0121253	3.83393	6.9417	9.45848	11.4457	6.65643	6.09506	3.92146	3.8283	8.00407	5.64411	7.07581	6.56662	6.06674	7.09368	5.36328	3.86453	3.87536	3.52161	6.16374	5.57369	7.02803	4.67096	4.08232	3.58472	6.29107	4.47297	4.75126	3.54421	2.71802	5.55391	5.85987	4.70831	4.20979	6.13548	4.96757	4.29737	5.12238	3.66866	4.09273	3.35949	2.87195
15q24.1-q24.2	NM_020447	57184	FAM219B	family with sequence similarity 219, member B	0.874562	-0.193368	0.000952035	0.0121461	8.82131	10.9162	11.0616	9.0448	11.1047	11.4531	10.7529	10.5226	10.5266	8.81608	10.4228	9.71186	11.9091	12.6636	12.5195	14.647	16.5778	15.2233	16.7628	14.9544	16.004	15.0211	9.86856	12.0266	14.0372	12.406	12.5182	10.5921	10.3095	14.0377	12.858	12.7543	11.2728	11.6415	10.7634	11.8323	13.9687	14.444	13.6481	8.75091	8.25566
7p14.3	NM_002047	2617	GARS	glycyl-tRNA synthetase	1.13537	0.183161	0.00095314	0.0121461	12.9033	48.1957	41.6268	43.6367	63.8321	63.3189	28.6195	38.6575	66.9041	30.467	29.7626	21.6667	42.0864	31.6133	37.9963	31.4646	27.8775	30.5791	25.0995	26.2013	29.2054	19.4659	14.0473	23.5831	43.8339	40.0039	39.2141	9.71057	10.3023	12.96	27.9146	27.4784	25.3871	53.0663	35.1269	42.6883	24.7452	21.7565	26.6126	15.1993	14.218
19q13.12	NR_027239	57711	ZNF529	zinc finger protein 529	0.834923	-0.260285	0.000950906	0.0121461	1.77948	1.684	0.829568	0.79413	1.31832	1.61926	1.9764	2.72336	0.598669	4.02376	3.73997	3.71211	1.68258	2.03316	1.91047	4.21983	4.13731	3.95041	2.12513	1.62649	1.87754	3.48343	2.79439	3.06941	2.13276	1.80124	1.73882	1.42782	1.55201	1.86192	1.5483	1.87621	1.61802	1.85117	2.04842	2.31401	2.06834	3.01513	2.06433	1.66999	1.23113
5q12.3	NM_001656	373	TRIM23	tripartite motif containing 23	0.709205	-0.495725	0.000956929	0.0121789	1.29337	3.13318	1.86167	1.85929	3.30651	3.60995	3.22738	6.94379	4.6501	7.89245	6.27342	5.11206	4.26293	5.05076	4.89493	7.45703	7.10546	6.42503	3.37908	4.20444	5.01055	4.45307	3.94075	7.52446	5.11789	4.08501	4.9325	2.29632	2.31513	2.87526	4.61441	5.64664	5.00765	5.52037	5.15815	8.29552	5.45337	6.06224	5.93942	3.4309	2.9878
16p11.2	NM_181718	253982	ASPHD1	aspartate beta-hydroxylase domain containing 1	0.691931	-0.531301	0.000959624	0.0121939	2.17886	0.722323	2.25407	2.67538	1.99446	2.43365	1.85369	2.04512	2.96624	4.5332	5.52155	4.77263	2.36015	3.2506	2.35046	4.21309	4.30805	3.91767	4.56097	3.94492	5.56551	3.25164	3.29865	2.62368	4.73394	5.51321	5.65055	2.88818	4.05471	1.46658	5.06643	4.40625	3.78507	4.01584	4.26006	3.28253	2.34638	1.84756	2.01586	2.6707	2.79638
14q23.1	NM_144581	112849	L3HYPDH	L-3-hydroxyproline dehydratase (trans-)	1.54013	0.623048	0.000960557	0.0121939	1.83571	4.55025	2.65628	2.21561	3.77892	2.88373	1.90944	3.3119	4.23029	2.41633	2.61569	2.70656	1.78832	1.82443	2.53851	1.38604	1.47818	1.61102	1.24509	1.76236	1.32483	2.79838	2.18695	2.01585	1.97626	2.68852	2.54225	1.88128	2.01537	1.7943	2.12268	2.5314	1.96566	2.22187	2.12633	1.48562	2.86269	1.82118	1.56192	1.38549	1.72423
5q13.2	NM_001207	689	BTF3	basic transcription factor 3	1.04178	0.0590482	0.000972352	0.012328	89.4804	160.519	281.902	281.411	270.891	237.841	179.894	284.172	276.157	211.614	219.754	169.268	242.261	182.341	214.637	129.488	102.235	92.3471	160.802	167.514	184.899	90.3452	106.85	146.148	232.753	197.184	216.27	58.852	60.2309	113.563	175.486	162.743	153.744	230.411	205.095	253.217	157.083	107.183	157.271	126.414	99.5198
16p13.3	NM_032569	84656	GLYR1	glyoxylate reductase 1 homolog (Arabidopsis)	0.8661	-0.207395	0.000982715	0.0124237	8.62669	9.47351	14.3163	6.45573	12.5311	12.9703	10.4706	6.6574	16.0346	10.8771	14.6543	12.9458	15.3058	16.3156	13.8454	15.5524	15.2218	15.4801	15.6957	14.0979	15.3652	11.4987	11.4987	9.53367	13.9857	14.1455	13.0295	12.3956	13.2431	16.7654	13.3515	14.6377	10.698	14.5919	12.1249	11.1419	12.7392	14.0036	12.6095	6.91834	7.81728
7q21.11	NM_012301	9863	MAGI2	membrane associated guanylate kinase, WW and PDZ domain containing 2	0.719849	-0.474235	0.000983635	0.0124237	2.80305	1.89358	0.524936	0.001568	1.05716	2.47729	2.96688	3.0367	0.748281	2.54787	2.6636	3.1228	2.51782	1.75002	2.38695	6.94426	7.08144	7.52786	1.18363	0.87811	0.000515	4.10559	4.32288	5.02074	2.84899	2.42786	2.99288	2.26713	2.81827	2.6478	1.66268	1.79774	2.29917	2.6049	3.42745	1.70716	2.70784	4.02679	3.10295	2.67879	2.66418
4q35.1	NM_020225	56977	STOX2	storkhead box 2	0.730997	-0.452062	0.000983533	0.0124237	3.35044	3.95685	3.066	2.04031	3.94005	5.55588	6.14448	4.71676	1.93119	4.28604	5.76553	5.23559	6.06911	6.42427	5.15312	10.2362	10.7815	10.5041	5.77635	6.37699	5.84857	8.05709	5.28667	6.82787	5.39005	4.35552	4.91998	2.73159	3.11751	4.98607	4.4611	5.51439	5.07856	4.51524	5.35171	6.06577	5.93249	7.54096	6.09071	2.88646	3.55603
16p13.13	NM_015914	51061	TXNDC11	thioredoxin domain containing 11	1.23326	0.302475	0.000986774	0.0124476	4.91176	8.30759	11.5781	9.5699	8.19877	7.11463	4.47692	4.06566	8.84111	6.61141	6.57146	5.90798	6.21171	6.17909	5.51696	4.56217	3.94266	4.37272	4.62167	4.91255	6.36622	4.31552	4.25826	4.09413	7.36437	6.78071	5.83561	4.91211	4.33682	6.59683	5.52576	6.5488	4.99464	7.72014	6.01504	4.78315	7.15949	5.48351	6.05824	4.07646	3.94162
20p12.1	NM_004587	6238	RRBP1	ribosome binding protein 1	1.27263	0.347809	0.00099245	0.0125034	10.5563	32.5158	21.9863	8.2415	25.1466	26.3741	7.09619	2.35242	34.0818	6.8199	13.8494	8.61613	8.33071	11.4421	13.1086	4.5589	3.51815	4.41203	14.693	15.6443	15.58	10.5722	5.26361	8.07528	19.6645	14.879	14.4462	7.66224	5.51236	11.5431	13.9081	16.6335	12.8145	18.8477	10.3742	12.916	9.08864	7.54796	6.26082	4.86868	4.3499
15q21.1	NM_004048	567	B2M	beta-2-microglobulin	1.04602	0.0649085	0.000996747	0.0125417	34.7292	72.5663	241.965	233.708	248.519	192.155	44.6187	101.43	241.867	132.753	117.331	83.0307	194.276	124.111	141.216	24.0749	25.5706	17.1859	191.295	190.967	215.976	70.2898	80.0407	84.6183	229.901	173.179	157.149	37.8481	35.1653	86.84	151.764	152.992	119.509	176.468	138.527	161.358	115.379	54.0188	108.478	101.218	49.0439
1p13.3	NM_001408	1952	CELSR2	cadherin, EGF LAG seven-pass G-type receptor 2	0.671583	-0.574362	0.000999949	0.0125661	18.1146	10.7334	6.71117	6.35007	3.46476	4.40036	13.2343	3.73724	2.35081	8.04201	8.59244	8.88586	8.41821	10.5933	6.60103	9.25839	9.4815	10.8575	10.6333	8.95216	8.51956	18.4141	14.7265	12.8563	6.06424	7.83581	10.8763	18.2844	15.7128	9.22271	10.6114	12.4543	15.1608	8.56249	13.5154	9.73409	8.40869	12.7805	7.81584	11.4458	14.7904
11p15.5	NM_021134	6150	MRPL23	mitochondrial ribosomal protein L23	1.24573	0.316991	0.00100185	0.0125742	43.2166	39.6676	39.239	46.4042	27.1148	22.4848	35.5159	31.9207	25.2272	17.0948	19.3485	13.2544	17.5176	26.1687	23.2228	11.4549	10.7603	10.6478	11.7707	11.9695	9.8615	18.4976	24.378	13.7714	19.9747	29.6568	31.9588	31.2246	32.3097	15.6282	20.6126	19.1054	17.8456	32.4555	33.5267	16.3772	21.0853	14.4952	15.7475	27.4044	29.0016
4p14	NM_000661	6133	RPL9	ribosomal protein L9	1.09343	0.128866	0.00101808	0.0127618	1294.48	2002.66	1966.3	2140.62	2320.74	1571.14	883.584	2276.84	1428.03	1552.03	1732.38	1658.26	1251.81	1542.37	1425.98	880.57	754.102	625.856	1250.91	1137.53	1207.95	859.907	1357.97	1043.69	1335.37	1219.8	1160.72	683.309	779.02	641.928	1533.25	1428.54	1306.25	1310.44	1411.45	1588.91	1040.77	786.014	940.828	1326.27	949.546
9q33.3	NM_007209	11224	RPL35	ribosomal protein L35	1.09157	0.12641	0.00102051	0.0127762	1399.4	1921.3	1885.8	1722.95	1647.06	1260.4	1517	1852.02	1145.66	1439.52	1414.72	1307.33	1305.98	1222.24	1017.03	652.486	571.125	506.081	1118.96	905.324	941.916	709.204	1058.49	789.157	985.326	1131.64	1337.22	1147.21	1172.43	428.475	1147.7	1124.45	1215.69	1290.52	1386.28	1024.22	898.456	739.922	789.616	1384.98	1423.62
12q13.12	NM_173602	57609	DIP2B	DIP2 disco-interacting protein 2 homolog B (Drosophila)	0.86694	-0.205996	0.00102365	0.0127995	4.38761	5.46481	5.11586	3.71248	5.00166	6.8944	6.14629	6.42202	9.67914	5.24535	7.23179	5.7431	8.91108	7.83102	8.40013	10.193	10.7955	10.2769	7.46363	7.31141	6.90984	8.36386	6.35567	8.0872	7.51764	6.53919	6.76328	4.71167	4.0169	9.27896	6.58619	7.9538	7.20521	7.19925	7.10497	7.16765	6.1243	7.30899	6.14603	3.35227	3.63808
14q22.3	NM_014750	9787	DLGAP5	discs, large (Drosophila) homolog-associated protein 5	1.47853	0.564168	0.00102835	0.0128361	1.90009	3.80613	5.77997	5.83379	5.57607	7.14081	3.45723	6.85642	2.79435	1.6059	2.96773	1.57148	8.70053	10.6887	8.69383	1.80956	1.25998	1.2777	4.83237	3.75169	4.81469	2.62154	1.8179	2.34616	4.68754	4.22266	5.51962	1.15851	0.537579	0.809792	3.0839	3.09743	3.99488	6.05155	3.65539	6.6818	1.51717	1.73198	1.46249	0.985282	1.22139
19p13.3	NM_005860	10272	FSTL3	follistatin-like 3 (secreted glycoprotein)	1.41721	0.503055	0.00103172	0.0128361	12.6905	7.87758	12.3629	8.38592	11.949	9.75277	7.71208	4.96393	12.6214	8.47382	9.39642	7.47755	5.00636	8.38687	6.75717	2.65309	3.08704	3.66032	8.10754	8.30468	9.98618	5.00173	3.54305	4.63991	6.85042	8.38466	8.40858	7.28717	8.3211	4.02704	7.79195	6.70025	7.72802	9.05607	6.45618	4.30821	4.37905	4.38726	3.39445	5.45298	5.61058
5q15	NM_005654	7025	NR2F1	nuclear receptor subfamily 2, group F, member 1	0.648479	-0.624867	0.00102959	0.0128361	25.7862	14.1234	13.1045	13.1406	9.18626	14.636	27.2194	14.91	1.25852	8.69149	7.1193	10.3171	19.9127	39.996	16.0669	56.3965	54.7008	60.9765	27.7558	23.172	25.6492	47.5345	48.1183	44.2527	15.7888	15.4887	22.8204	44.3642	40.3093	25.985	22.4226	23.5672	23.7131	16.5721	23.5413	23.2228	16.6304	21.4412	18.1232	23.0935	26.4438
6q21	NM_014028	28962	OSTM1	osteopetrosis associated transmembrane protein 1	0.810651	-0.302848	0.00103147	0.0128361	2.06503	2.3122	3.94523	3.83755	3.09431	3.4986	2.53336	4.08838	7.18961	5.48303	5.84573	5.06551	4.47474	5.4023	4.10604	5.18482	4.82866	4.14433	6.29974	6.8688	8.2708	2.90541	4.30311	4.31811	5.0063	3.83939	3.89285	5.4565	3.72682	10.8537	4.56253	4.80324	3.67432	4.48116	4.68588	4.26798	5.7835	3.46167	5.34068	4.06803	3.23493
22q13.1	NM_002305	3956	LGALS1	lectin, galactoside-binding, soluble, 1	1.17461	0.232182	0.0010361	0.0128745	355.753	431.8	60.9296	58.0835	382.289	327.904	341.4	341.447	71.1082	63.2819	63.0556	47.7068	178.308	279.217	210.581	32.9639	28.7455	27.0649	48.9147	51.1557	52.6005	120.498	105.018	111.84	196.442	213.028	272.429	114.359	109.987	54.1874	93.677	63.4391	70.8178	226.139	153.135	93.4667	64.7316	37.5316	46.7737	133.273	111.554
19q13.32	NM_004491	2909	ARHGAP35	Rho GTPase activating protein 35	0.853686	-0.228223	0.00103746	0.0128753	7.30948	13.9248	8.32775	6.79237	10.5731	13.5445	12.0108	6.65439	13.8707	9.14965	11.7961	10.6701	12.1508	13.2793	11.7703	20.9084	21.8933	23.1549	13.7376	12.9642	12.7733	14.1459	10.3995	11.6584	13.6971	12.0429	12.6849	8.82287	8.48779	11.9644	10.9341	12.5407	11.3662	12.7578	12.7758	13.0579	11.651	13.1594	10.9141	6.68075	7.94216
11q13.4	NM_020798	57558	USP35	ubiquitin specific peptidase 35	0.93058	-0.103798	0.00103901	0.0128786	3.7454	2.24692	2.0134	1.71347	1.50438	1.71624	3.21852	1.37801	2.40993	2.0445	2.29503	2.12381	1.40342	2.18977	1.92564	4.19131	4.15223	4.0987	2.56141	1.98395	1.98578	2.83315	2.7118	2.84083	1.78611	2.35091	2.6974	4.58616	3.782	2.49744	2.16931	2.74179	2.8252	2.89807	2.59184	2.07101	2.44894	3.61731	2.71306	1.89767	2.73596
13q14.11	NM_013238	29103	DNAJC15	DnaJ (Hsp40) homolog, subfamily C, member 15	1.64728	0.720084	0.00104526	0.0129139	4.20318	6.29103	13.4641	12.8776	10.3735	11.0305	5.57136	10.7654	8.58253	6.34644	5.42284	4.36618	5.66458	7.29744	5.58863	5.39681	5.07741	4.36095	5.86029	6.0419	7.05501	3.12226	3.65979	3.38551	6.97358	7.08643	7.21068	3.98968	3.84706	4.35746	5.51762	3.98662	4.46074	5.20633	4.24486	3.8456	2.59821	1.77915	2.73814	5.39467	4.84185
2p22.2	NM_005102	9637	FEZ2	fasciculation and elongation protein zeta 2 (zygin II)	1.2187	0.285342	0.00104417	0.0129139	3.55423	10.3331	14.7622	13.9971	9.67985	14.043	5.83456	8.33389	26.4137	7.41797	7.61918	4.64494	11.7769	9.74537	10.7538	4.40252	2.34249	2.8433	7.26041	8.77574	8.83208	4.69438	4.97907	6.09473	12.7275	12.4732	10.3075	5.92494	5.56505	13.222	9.81958	7.97789	7.87934	13.5339	10.834	10.7723	8.92241	6.01236	7.87512	6.14647	5.09062
19p13.11	NM_024069	79036	KXD1	KxDL motif containing 1	1.09442	0.130162	0.00104575	0.0129139	34.2152	39.1803	41.515	41.3958	30.8475	25.7969	33.2515	23.6741	28.8211	32.0739	29.8201	28.5416	22.5968	30.4293	25.7236	19.7399	19.0477	19.3725	26.6907	20.7742	24.0698	17.6639	24.8292	21.1604	22.6808	23.8543	27.8263	28.5019	25.9055	13.3355	27.0673	26.6052	25.4251	25.2377	27.3552	23.0722	20.8885	19.9935	18.9643	23.7208	24.9137
1q42.12	NM_003133	6726	SRP9	signal recognition particle 9kDa	0.860621	-0.216549	0.00105521	0.0129968	30.1795	63.1057	92.3655	95.6238	79.4415	97.555	46.8411	138.008	76.7519	130.091	131.806	115.173	108.417	159.863	119.447	123.427	111.589	92.7779	93.376	99.3689	97.3468	70.0098	115.699	111.432	113.37	99.9656	100.096	49.2364	45.0506	112.448	106.713	119.161	90.4628	108.508	115.768	143.198	129.536	89.7541	115.266	129.333	79.1491
9q34.11	NM_001040011	375757	SWI5	SWI5 recombination repair homolog (yeast)	1.15304	0.205449	0.0010541	0.0129968	15.1878	21.6201	14.7193	13.7506	16.4181	14.9826	11.7418	16.8463	14.4116	10.9564	12.0548	9.37947	13.3556	11.4725	9.35508	5.34811	6.4395	4.55252	14.9069	13.229	15.9277	10.6487	12.2409	12.4822	15.1279	13.3809	15.1554	11.869	13.7751	9.81549	14.6495	15.34	12.9397	13.4692	11.6066	10.6092	11.7773	10.8442	13.006	15.2106	13.6688
15q15.2	NM_173500	146057	TTBK2	tau tubulin kinase 2	0.802919	-0.316673	0.00105636	0.0129968	2.62697	4.13479	2.27834	1.97916	2.96995	4.82344	4.3405	5.04796	3.00052	3.32208	3.812	3.56216	5.50779	4.85421	4.8692	7.07796	7.48152	7.17113	5.634	6.23144	5.18832	5.25816	3.92667	5.41116	4.26861	3.78397	4.13761	2.46251	2.73132	4.98358	4.45986	5.07885	4.70634	4.35368	4.45296	5.67938	4.57093	5.25255	4.97178	2.56063	2.56234
11q12.3	NM_001620	79026	AHNAK	AHNAK nucleoprotein	1.20272	0.266303	0.00106027	0.0130128	11.2434	30.4769	28.0155	9.08796	29.9045	41.4154	13.3452	8.09574	58.3336	15.2257	24.7422	10.0698	35.6971	17.5138	37.6078	3.53938	3.79208	3.76	22.2672	20.5126	17.2352	25.1272	8.92005	17.5281	27.3609	30.9405	27.0848	8.64723	10.6716	19.3079	18.1594	19.7889	19.6258	45.0858	21.1179	26.7961	11.611	9.33966	9.45072	5.58805	4.80849
5q13.3	NM_005242	2150	F2RL1	coagulation factor II (thrombin) receptor-like 1	1.76383	0.818708	0.00105945	0.0130128	0.385796	0.871611	13.5095	11.5276	5.43229	4.65099	0.429044	1.19489	17.9489	2.54725	3.38343	2.05059	1.80053	1.70023	1.66603	0.620218	0.32303	0.325054	2.73886	2.82813	4.27823	1.53171	1.30142	1.40011	2.11135	1.52469	1.90228	0.433917	0.568618	1.53729	2.61372	1.95396	2.43217	2.23373	2.47794	2.66837	3.03994	1.88398	3.68297	0.847248	0.70265
17p13.2	NM_053013	2027	ENO3	enolase 3 (beta, muscle)	1.76594	0.820438	0.00106292	0.0130293	6.94604	4.03128	4.84656	4.9197	8.31038	3.92167	20.7341	16.3768	1.79404	3.0128	2.56338	2.30128	3.14273	4.45993	7.39522	1.70217	1.0959	0.816451	3.6753	3.23655	3.09891	4.08677	4.9425	1.7247	5.79233	1.57736	2.53764	4.01858	3.03529	3.55558	6.89606	3.96706	4.1806	2.72531	2.5902	2.05088	3.88713	2.16765	3.44476	3.11594	2.28484
Xq11.1	NM_001012968	139886	SPIN4	spindlin family, member 4	0.788705	-0.342442	0.00106563	0.0130464	1.11641	3.14035	3.11373	2.18453	2.36182	2.66396	1.09862	1.07849	4.05776	3.13711	3.54969	2.98516	3.22389	4.32514	3.18554	3.30743	2.79264	3.21016	3.68624	3.6242	3.42783	3.37158	4.10716	2.92443	3.95066	3.72635	3.2748	2.29226	1.88819	4.00818	2.6689	3.21641	2.52084	3.21132	3.62964	4.0321	2.70844	2.88982	2.4178	2.07899	2.20525
6p22.1	NM_003533	8354	HIST1H3I	histone cluster 1, H3i	1.09107	0.125741	0.00107196	0.0130758	273.709	231.452	233.971	262.739	96.6648	90.6447	211.559	192.845	55.3995	113.762	123.82	113.187	199.102	217.437	171.472	32.6499	28.4606	34.5995	114.63	83.7003	99.6732	68.2215	102.616	58.709	112.656	166.497	204.211	54.6008	61.1107	40.971	127.979	132.013	154.076	131.014	127.287	124.101	43.6204	40.1374	33.0215	96.1749	102.273
12q13.13	NM_001039960	9498	SLC4A8	solute carrier family 4, sodium bicarbonate cotransporter, member 8	0.637801	-0.648822	0.00107129	0.0130758	2.13353	2.2214	0.802099	1.209	2.10486	3.63071	4.48048	4.48661	1.04451	3.21694	3.70767	3.12857	4.13896	5.27863	4.39565	7.6631	8.32529	8.72235	4.80637	4.83066	3.56936	6.03249	4.03118	5.09812	3.38269	4.19449	4.65391	1.96609	1.85496	2.61672	3.32585	5.0532	4.80415	2.61383	6.35124	5.29363	3.67081	4.76058	3.52476	1.74904	1.83099
3q26.33	NM_003106	6657	SOX2	SRY (sex determining region Y)-box 2	0.653666	-0.613374	0.00106937	0.0130758	9.37981	12.6358	12.8644	10.67	10.796	16.6048	11.9179	5.34349	4.19491	15.9836	19.23	17.4042	24.5346	39.0128	14.0044	25.2949	22.1238	18.0011	19.7317	21.3621	21.1656	25.4659	28.2267	28.5508	20.209	15.1705	17.0734	7.50734	6.43265	9.80317	18.5403	25.7714	21.1089	14.1125	16.3129	19.6608	24.1604	19.678	22.5766	19.5243	15.689
Xq13.3	NM_020932	57692	MAGEE1	melanoma antigen family E, 1	0.810513	-0.303092	0.0010766	0.0131164	2.29422	2.43381	1.01115	0.87061	1.89018	1.8157	3.48929	1.99571	0.95576	2.00065	3.20783	3.0991	1.58398	2.11481	1.56472	6.13672	6.34571	7.02668	1.8914	1.656	1.85608	3.58289	2.70446	3.21398	1.99125	2.36037	2.44757	2.24314	2.14697	2.61867	2.31852	2.77895	2.38628	2.3895	3.27613	2.68403	2.47129	3.56891	3.46904	1.91725	1.69643
15q15.1	NM_130468	113189	CHST14	carbohydrate (N-acetylgalactosamine 4-0) sulfotransferase 14	1.35882	0.442353	0.00108438	0.013179	15.8426	18.6884	13.7361	11.3629	11.0973	8.1573	7.14768	3.02885	9.17993	5.39417	6.31895	4.51643	7.51541	7.01014	6.59232	1.46696	1.10087	1.52011	7.59136	6.637	8.88981	5.22965	4.81843	4.20092	7.88103	9.41743	10.975	11.498	10.5298	6.0681	9.45471	8.6452	7.49246	10.6429	8.54904	5.7913	7.52655	4.95802	5.62132	5.95524	7.50476
1p34.3	NM_004468	2275	FHL3	four and a half LIM domains 3	1.5642	0.645423	0.00108393	0.013179	10.6012	12.4339	11.4945	9.10413	11.0148	8.40513	6.89117	1.29177	11.9354	4.91008	4.74112	3.55017	5.86392	6.69919	4.95689	2.14345	1.96558	2.20084	4.42417	3.71176	4.80151	3.57733	3.49503	3.40609	8.25925	7.51109	7.75932	7.66698	7.41717	3.39299	6.5142	6.72421	6.74733	8.43899	6.45995	5.50184	2.60514	1.18825	2.67399	3.89066	3.36018
19q13.33	NM_032712	84798	C19orf48	uncharacterized protein C19orf48	1.30083	0.379437	0.00108937	0.0132235	19.8122	31.0622	28.2624	38.2819	22.6393	20.3677	14.8641	19.7831	24.6589	20.9327	19.875	17.357	15.7172	22.2333	16.6163	7.00861	7.61126	6.96689	10.4307	7.39142	9.42817	16.322	16.8938	10.3596	18.4139	24.8409	25.6394	14.3047	16.5247	9.2821	16.4355	18.6757	19.0737	29.5737	19.4871	14.2665	5.36261	4.29232	6.36073	13.2309	13.9819
19q13.4	NM_001136135	6158	RPL28	ribosomal protein L28	1.09641	0.132792	0.00109118	0.0132293	181.913	165.823	246.176	268.496	186.372	131.212	141.477	169.789	196.013	123.513	136.809	157.535	106.017	130.299	157.514	56.8754	59.5974	62.4418	147.277	116.1	124.857	77.3182	129.706	69.4655	127.772	161.011	180.887	111.184	152.217	68.1283	114.285	112.555	91.1785	171.066	121.713	101.401	68.9661	53.9699	55.8687	113.686	112.57
17q24.2	NM_014405	27092	CACNG4	calcium channel, voltage-dependent, gamma subunit 4	0.811651	-0.301068	0.00109671	0.0132803	24.5225	11.8981	10.2314	10.0172	6.4345	8.30713	18.1754	7.0669	7.94327	12.2086	11.4136	13.3861	9.84294	11.5898	7.24116	22.4799	22.7002	26.5113	8.36182	6.6943	6.62975	15.1293	16.6197	13.2749	10.5438	12.9067	15.4569	25.2136	23.011	12.7216	13.7412	13.8112	14.9846	10.957	16.2747	12.4157	13.5649	17.2384	14.0023	15.4028	17.8326
5q31.2	NM_022464	64374	SIL1	SIL1 nucleotide exchange factor	1.24064	0.311086	0.00110751	0.0133948	20.6515	25.7229	28.6462	23.0054	23.1488	20.3497	15.3314	10.4915	33.9491	12.3806	12.6753	11.2949	13.2621	12.375	15.4366	5.22449	5.55713	6.01965	19.6064	17.8732	21.8258	10.492	9.82892	8.65981	21.9244	23.8202	19.9772	18.6986	19.0639	13.5743	15.1779	14.7081	13.9433	24.9311	20.9889	12.2226	18.4508	13.8385	15.7064	17.3897	18.2524
6q25.1	NM_001242768	25902	MTHFD1L	methylenetetrahydrofolate dehydrogenase (NADP+ dependent) 1-like	1.27583	0.351441	0.00111255	0.0134394	2.6061	6.42932	7.00305	4.33718	5.46127	7.00282	3.40104	4.00695	10.509	4.5892	5.46881	3.94334	6.36356	5.66721	5.48595	4.64037	4.2775	4.27006	3.30227	3.53422	3.36682	2.82526	2.6651	3.68227	6.50576	6.30295	5.14164	1.95766	1.80605	3.76564	5.07101	4.76089	4.24369	7.73161	4.85489	4.61783	3.56183	2.87833	3.23024	2.2654	1.68991
2p21	NM_005400	5581	PRKCE	protein kinase C, epsilon	0.908697	-0.138129	0.00111528	0.0134561	2.41712	2.09321	3.24863	1.97953	2.1749	2.83541	2.76331	2.11315	2.16762	3.66252	4.21871	4.4483	2.56924	3.78663	2.91077	9.38014	9.77714	9.09135	2.66612	2.83866	2.46223	5.26387	4.29367	4.87127	2.48289	2.39773	2.39272	2.37602	2.36445	3.89201	2.21796	2.3908	2.12879	2.49077	2.2307	2.25624	2.19831	2.55446	2.67466	1.79963	1.65128
2p23.3	NM_001013663	391356	PTRHD1	peptidyl-tRNA hydrolase domain containing 1	1.15568	0.208738	0.00111841	0.0134776	30.6154	45.6042	35.5173	43.0137	31.333	23.1758	23.5287	29.295	16.2616	19.3063	17.8028	16.5983	20.822	22.5437	23.2001	17.2951	13.9356	14.3261	18.9995	15.6305	17.0732	15.7273	21.4652	13.0463	21.4145	25.8372	32.1909	26.903	28.3953	12.38	25.2926	25.2346	22.0278	25.4502	30.476	16.3443	19.6574	11.739	16.107	21.1433	21.5009
17q25.3	NM_012336	26502	NARF	nuclear prelamin A recognition factor	0.846458	-0.24049	0.00112975	0.0135979	26.7482	26.5474	24.1295	23.2583	22.0489	21.6196	26.6417	35.8988	11.3604	34.3458	38.0233	41.955	25.9013	41.9868	30.399	37.4309	33.4242	29.5697	26.3324	23.1246	23.6432	26.44	29.3537	27.2676	27.7431	27.1246	29.3609	25.7514	24.2397	20.4645	31.532	33.1567	30.457	26.7203	30.492	27.8639	31.1985	28.4633	31.5761	25.0548	25.2321
7p15.3	NM_013293	29896	TRA2A	transformer 2 alpha homolog (Drosophila)	0.778022	-0.362117	0.00113429	0.0136361	3.28977	4.40038	4.32523	6.16406	6.46016	7.60028	5.25477	9.09634	6.42312	13.4619	10.8846	11.0797	14.5879	11.6653	11.1486	10.3248	8.12916	11.3367	9.11091	8.36295	7.29004	7.10923	6.79485	8.18861	9.60924	9.36831	8.84639	4.43161	5.19131	5.66174	6.95734	6.52105	5.39184	10.5703	9.33345	8.67083	8.52317	5.9873	6.50723	4.54658	4.24914
22q11.21	NM_003776	64976	MRPL40	mitochondrial ribosomal protein L40	1.1336	0.180909	0.00114989	0.013807	20.5386	23.2737	33.3095	35.4975	28.2087	23.8723	23.4136	41.8	32.7126	24.848	29.2578	21.4864	18.8287	21.3703	22.929	16.3156	17.8099	15.5396	21.6353	21.7343	25.3901	17.2517	26.0397	18.6786	20.6398	20.6175	18.4627	19.5541	19.2021	15.5474	22.544	26.7208	17.8391	23.4199	22.3327	19.6083	22.7222	18.143	20.4618	21.3845	19.0832
17q21.2	NM_006455	10609	LEPREL4	leprecan-like 4	1.12835	0.174218	0.00115209	0.0138168	37.4078	55.8988	32.8671	30.4377	31.6722	24.9971	24.8496	12.2685	26.1391	21.0299	18.8443	16.9438	16.7565	19.3087	17.8125	9.0633	8.88121	9.39375	21.4345	19.4758	22.581	16.7975	18.5832	17.8485	24.4931	31.2561	33.2546	29.783	28.5295	15.2329	30.7529	30.0392	30.5079	29.7324	26.7344	20.6011	19.4912	15.0978	17.4022	29.3627	30.7955
16q21	NM_002080	2806	GOT2	glutamic-oxaloacetic transaminase 2, mitochondrial	0.897644	-0.155784	0.00115662	0.0138403	17.0817	20.1488	27.752	20.162	22.2733	22.4851	25.0407	21.8559	28.7505	24.9045	30.9492	28.9037	24.0322	27.5482	26.8447	30.2835	30.1014	31.0509	25.5571	22.0042	25.7337	23.0496	19.2542	17.8688	25.949	23.9202	23.1187	19.6129	17.1443	30.6918	22.9467	27.3261	23.7877	29.1517	28.4551	27.4497	30.8256	33.1374	33.0305	19.5347	18.6899
21q22.3	NM_032261	84221	SPATC1L	spermatogenesis and centriole associated 1-like	1.27003	0.344864	0.00115683	0.0138403	10.6445	6.75228	9.57544	7.76798	5.53988	3.28035	10.983	4.1402	4.76489	4.86895	5.42228	5.47254	4.65055	5.81667	4.43985	0.541631	1.14419	1.37985	6.52327	5.23813	6.7208	4.37253	4.72624	4.58649	6.55778	7.23603	7.01779	2.63783	3.18311	1.28259	5.09608	6.01812	5.24782	6.71775	5.85011	4.67429	4.57177	4.78701	3.68863	6.31366	6.25774
12q21.1	NM_139207	4673	NAP1L1	nucleosome assembly protein 1-like 1	1.04085	0.0577678	0.00116228	0.0138889	18.244	47.3662	55.2836	67.4206	62.0073	56.565	31.2117	51.4136	37.4389	56.2799	49.5632	34.8606	75.0277	59.133	76.8224	20.1729	18.0614	18.4764	52.527	60.7993	57.2277	22.1449	18.7688	29.01	62.6954	56.0368	57.9645	11.0143	11.0941	13.9725	51.1938	46.8558	47.5744	57.7459	48.7115	82.5536	25.4327	21.3798	29.0289	20.9992	17.6141
18p11.32	NM_006101	10403	NDC80	NDC80 kinetochore complex component	1.33868	0.420808	0.00116687	0.0139271	1.53163	3.85701	4.3947	5.71385	6.38644	5.6335	2.59749	4.85308	2.92878	3.44699	3.40846	1.89306	8.99442	9.91253	9.02923	1.44289	1.22443	1.31979	4.29104	3.60631	3.18327	2.15919	1.76073	2.59389	4.65475	4.97331	4.59249	0.521976	0.734361	0.672281	3.95952	4.15367	3.70063	5.22592	4.81849	4.82471	1.27061	1.15694	1.32178	1.8197	1.37612
3p25.1	NM_022497	64432	MRPS25	mitochondrial ribosomal protein S25	0.940749	-0.0881181	0.00117086	0.013948	2.84515	3.74901	4.10694	3.09819	3.75556	4.72227	4.11908	3.30917	4.50718	4.13714	4.25311	3.69931	3.95398	4.33376	5.33481	7.06208	7.4943	7.09798	3.74503	4.31202	3.33596	5.54879	3.96651	4.2877	4.70402	4.1376	4.36712	3.79929	3.30757	4.85186	4.08734	4.69523	4.0353	4.0654	3.65496	3.98179	4.35482	4.4878	4.46167	2.76163	2.90756
6q21	NM_032194	84154	RPF2	ribosome production factor 2 homolog (S. cerevisiae)	1.3052	0.384273	0.00117282	0.013948	1.62998	3.34549	5.13352	5.04237	6.58677	6.82612	4.06542	5.86661	5.62418	6.47685	5.37953	4.41803	6.16691	4.23684	6.02689	2.91919	2.58738	3.02107	3.18641	4.231	4.09795	2.03382	1.92532	2.88996	4.99817	4.02119	4.15872	2.04439	1.63421	3.51866	3.98675	3.51596	3.01882	4.29796	2.9631	3.49038	3.40648	2.85061	3.582	2.07581	2.46696
5p15.2	NM_007118	7204	TRIO	trio Rho guanine nucleotide exchange factor	0.845506	-0.242113	0.00117221	0.013948	8.54239	12.793	7.22566	3.96849	9.75049	11.7125	13.5017	7.56216	13.8427	9.17915	11.3644	11.5677	10.0907	11.8882	10.2659	23.8359	25.3949	26.6251	12.1296	10.8527	10.6216	16.6269	11.2662	12.3407	11.3143	11.3682	11.6112	8.0798	8.98901	13.014	9.62252	11.3315	10.7116	10.5617	10.6718	10.1478	10.3894	13.8447	11.3284	6.61637	7.03743
7p14.2	NM_018685	54443	ANLN	anillin, actin binding protein	1.40023	0.485662	0.00118008	0.0139869	1.22235	3.81043	5.88224	3.61661	5.33539	4.48715	2.71671	3.06677	5.44584	3.98398	2.49601	2.17739	6.0631	5.56964	7.47085	1.7275	0.43334	0.97057	5.07173	4.51354	4.03695	2.53194	1.83522	1.42576	3.55262	4.64074	4.48141	1.0915	1.10965	0.603724	3.97111	3.18317	3.12026	6.47931	3.1566	4.43232	2.39498	1.58982	2.26993	0.62633	0.890785
1q25.3	NM_015039	23057	NMNAT2	nicotinamide nucleotide adenylyltransferase 2	0.650954	-0.619372	0.00118029	0.0139869	3.81532	3.01539	1.73558	1.34799	3.93592	5.8857	9.63089	7.82921	1.62043	6.10877	7.52189	6.37637	4.5767	4.93375	4.65991	17.7594	18.0128	18.648	3.62431	3.49713	3.19099	7.4575	6.0818	7.4271	4.90959	4.97293	5.44228	4.12114	3.83435	6.35572	5.77552	6.54809	6.14895	6.03623	9.20403	7.51749	7.28173	10.2596	8.61477	3.54747	4.37896
1p12	NM_004892	9554	SEC22B	SEC22 vesicle trafficking protein homolog B (S. cerevisiae) (gene/pseudogene)	1.08852	0.122374	0.00117859	0.0139869	8.17054	32.5121	34.5538	33.9182	33.1273	30.0297	14.4501	30.7523	41.5509	30.272	30.5967	22.0386	28.4197	24.4076	29.8588	13.8617	15.0411	11.5873	21.4889	24.9351	26.347	11.8665	11.4321	15.6529	38.4995	27.4537	29.9663	10.9711	9.63525	20.488	25.8415	24.5061	21.6853	28.4423	21.1955	24.3535	23.4613	14.3111	21.622	15.0241	11.3192
19q13.42	NM_032430	84446	BRSK1	BR serine/threonine kinase 1	0.752825	-0.409614	0.00118715	0.0140133	25.0071	13.9459	7.82182	7.41362	8.80881	10.5709	32.6103	10.7542	4.98876	17.4309	15.161	18.3758	8.91361	16.5158	7.18155	37.5772	38.513	39.8133	13.2856	10.8975	12.3189	22.4102	21.9242	20.3421	13.5244	15.8328	18.926	24.8885	23.0595	9.32579	16.4241	18.1043	19.2383	12.4707	18.5056	13.754	15.2302	18.5393	15.3229	19.4464	21.5739
1q21.3	NM_001826	1163	CKS1B	CDC28 protein kinase regulatory subunit 1B	1.07967	0.11059	0.00118424	0.0140133	41.8877	49.5033	70.6173	79.2098	52.8708	44.7975	20.9137	37.226	35.3883	35.1832	45.2914	29.3914	60.9773	71.0352	54.3313	13.4643	12.3706	11.6955	49.068	34.3059	41.6017	30.2669	35.8487	22.4822	38.5565	43.5925	36.364	23.3082	25.6813	19.9743	42.145	43.7137	42.144	47.0481	39.9013	31.7987	24.2393	20.464	22.2553	45.1595	33.1995
6p25.2	NM_206836	10455	ECI2	enoyl-CoA delta isomerase 2	1.15596	0.209093	0.00119036	0.0140133	8.44701	12.639	16.5478	16.9143	10.2836	15.3559	10.6424	16.5608	17.9925	11.2911	12.4027	11.5033	12.2267	13.8515	17.0818	7.05204	6.00573	5.75075	11.8125	13.3315	15.2629	4.07291	7.81758	9.03749	13.8962	16.7502	12.9002	5.8307	4.6738	14.4371	10.3352	14.9957	10.6251	12.1565	15.0307	11.1201	6.95368	9.25064	10.5719	6.1973	9.41316
1q21.3	NM_001271958	27173	SLC39A1	solute carrier family 39 (zinc transporter), member 1	1.14855	0.199815	0.00118846	0.0140133	34.0357	34.1918	40.8682	44.1747	28.1874	23.8611	26.1449	18.7431	47.4911	21.9812	21.3051	17.8868	19.015	22.4287	19.7318	11.3833	10.1755	11.4571	24.547	20.2474	23.2747	16.676	19.8573	17.0068	21.9629	26.4956	30.8238	31.4489	28.2282	16.4641	25.0577	25.511	26.9158	29.9094	25.3567	23.9711	20.9027	19.4811	19.5313	32.4786	33.1107
11q12.3	NR_003098	23642	SNHG1	small nucleolar RNA host gene 1 (non-protein coding)	1.12009	0.163611	0.00119095	0.0140133	21.5701	32.4463	46.8964	60.8552	56.8256	43.2719	32.5288	68.3989	40.7569	33.5616	35.0352	34.523	43.1508	47.4438	44.5242	25.5054	24.3882	21.509	26.9866	27.3458	26.3158	30.1609	31.2261	36.9937	42.6237	38.5047	37.5127	8.76808	10.5628	17.6947	31.1867	35.7961	28.2365	42.0459	34.2138	53.1258	20.5461	21.2886	19.6777	14.1779	11.9326
15q11.2	NR_003316	100033413	SNORD116-1	small nucleolar RNA, C/D box 116-1	0.846613	-0.240225	0.00118597	0.0140133	1429.67	909.867	59.242	526.671	364.745	1011.58	707.134	599.529	624.687	491.152	345.618	559.022	513.701	561.327	711.464	1367.63	1370.15	2405.28	1299.36	1029.47	1510.85	1140.08	753.04	1090.13	551.152	743.94	1099.93	494.818	1017.06	558.083	829.963	1466.47	1069.14	702.324	591.407	753.788	443.923	1043.39	1016.33	1828.11	985.052
1p36.23	NM_004781	9341	VAMP3	vesicle-associated membrane protein 3	1.1339	0.181293	0.0011933	0.0140244	12.6718	21.9154	34.9064	29.1936	24.6953	23.4029	7.99329	14.0496	33.4242	18.6887	21.6054	17.6623	20.0701	18.3317	21.467	7.45794	7.5506	7.14169	16.0764	16.1414	18.6215	12.6328	12.7039	12.5883	21.0035	20.2867	18.6238	11.8117	11.9044	19.3073	19.015	18.5065	15.7666	19.79	16.7305	17.4853	16.2847	13.0898	15.3391	12.9971	12.5405
14q24.2	NM_031464	83694	RPS6KL1	ribosomal protein S6 kinase-like 1	0.743783	-0.427047	0.00119864	0.0140706	4.31177	1.64785	0.757281	1.2251	1.41974	2.06644	6.67921	2.71737	0.452773	3.60574	3.3267	4.45854	1.30815	3.67897	1.31207	7.70877	8.55731	7.96913	2.59146	2.22205	2.09474	5.10308	4.42244	3.85714	2.11473	2.37863	2.72608	3.62458	3.95729	1.81589	2.46001	2.70364	3.01753	2.20529	3.54791	2.42955	2.36688	3.5174	2.56246	2.81952	3.33183
7q22.1	NM_016188	51412	ACTL6B	actin-like 6B	0.556386	-0.845842	0.00120992	0.0141568	12.8231	6.42184	1.46724	2.75182	4.58402	7.11144	25.3571	5.48816	0.161384	11.8368	12.1436	13.624	7.20384	11.7086	3.9187	29.0438	27.3837	27.8699	5.39238	4.02094	5.01276	16.0946	19.9796	14.4503	9.52027	10.0856	12.673	13.3562	13.8489	5.26337	7.81399	9.71439	8.84275	8.10681	15.6153	7.8898	9.61189	12.3935	12.3245	13.531	13.6359
19p13.3	NM_032306	84266	ALKBH7	alkB, alkylation repair homolog 7 (E. coli)	1.22188	0.289107	0.0012105	0.0141568	43.0674	37.6947	26.2844	38.6365	24.6746	18.7898	52.2304	65.9068	24.6429	20.1554	19.9862	22.6883	13.5211	19.3149	16.6427	14.121	11.0906	17.0502	15.1668	12.4817	14.556	12.413	22.324	13.8617	22.4495	26.2861	33.3098	21.6334	20.8324	8.74965	23.3275	24.9417	24.2201	25.5988	24.6249	19.1824	15.9564	12.9772	14.2485	29.4066	34.4887
9q33.3	NM_014636	9649	RALGPS1	Ral GEF with PH domain and SH3 binding motif 1	0.74055	-0.433331	0.00121307	0.0141568	2.68698	3.15287	1.69347	1.39574	2.66932	3.04715	5.272	3.98855	1.2845	3.99224	4.31472	4.67713	2.19534	3.37877	2.64118	11.2376	12.6955	13.0118	2.28232	2.13658	2.25063	6.67374	5.26737	6.85977	3.21542	3.09514	3.37627	3.81519	2.9716	4.66384	3.58089	4.38124	4.22949	3.15699	4.6532	4.21695	4.02247	4.96571	4.3708	3.08605	2.96947
5q35.3	NR_002591	619570	SNORD95	small nucleolar RNA, C/D box 95	0.218239	-2.19602	0.00121075	0.0141568	0	0	0	15394.5	8269.75	3342.23	4939.93	7742.21	16239.3	27430.8	10715.6	8533.8	6930.01	5004.38	5085.34	25334.5	24965.3	22022.5	16051.3	13165.6	29986.7	26023.6	14416.6	11512.6	37699.3	43933.1	36548.8	7036.9	20229.2	26013.7	22896.6	19906.9	20272.2	25096.8	15874.2	16095.6	25281.2	18091.3	13977.7	17513	11569.1
17q12	NM_014598	30837	SOCS7	suppressor of cytokine signaling 7	0.798729	-0.324222	0.00121215	0.0141568	3.54719	4.21258	3.35148	2.01532	4.18693	5.6398	6.0984	3.19829	5.7639	6.34396	8.52281	8.2391	5.74238	6.40672	5.04281	10.5347	12.3322	11.8561	6.42794	6.08938	6.09494	6.61038	3.73194	4.60108	5.57811	4.72091	4.67046	3.36723	3.17951	5.71924	4.95543	6.49395	5.21616	4.74206	4.0042	5.65202	5.28018	7.32212	5.98712	2.30339	2.83978
2q37.1	NR_003008	677775	SCARNA5	small Cajal body-specific RNA 5	0.833227	-0.263218	0.00122103	0.014233	261.538	63.7211	38.0741	221.792	145.105	180.524	556.556	451.422	44.678	260.709	198.816	237.218	356.185	250.072	276.058	284.598	275.215	224.981	303.051	372.745	264.24	124.913	172.634	142.309	341.692	285.79	382.345	235.447	343.664	219.739	214.581	203.928	302.201	206.283	206.601	193.324	307.278	341.838	369.849	383.613	414.103
17q11.2	NM_152345	124930	ANKRD13B	ankyrin repeat domain 13B	0.720194	-0.473543	0.00122468	0.0142589	10.2506	7.24519	3.48729	3.32787	4.27027	4.49685	8.93822	2.64362	1.78303	7.20035	7.50535	9.644	5.02553	4.95149	2.57142	12.1427	12.713	14.3293	6.62323	5.31936	5.77975	10.2286	7.14014	8.0404	4.37012	4.5405	6.91284	11.1329	10.6056	6.58298	7.54812	9.07558	9.16816	4.62962	6.64921	6.26141	6.74616	8.07372	6.65782	6.59997	7.79716
16p11.2	NM_012385	26471	NUPR1	nuclear protein, transcriptional regulator, 1	1.42023	0.506121	0.00122762	0.0142765	11.8117	63.8437	9.31575	5.80957	25.3206	20.732	7.61187	9.0287	4.13671	4.87475	6.35636	4.47832	10.6916	10.6703	7.9012	2.28515	2.71639	1.89442	15.2756	13.2787	17.5886	5.63875	5.15199	5.41237	12.1028	11.0386	15.575	9.21948	9.31306	5.26598	12.8589	12.2418	8.8197	14.9948	11.4406	7.12372	5.30577	3.92866	5.46484	8.87117	8.05482
5q31.2	NM_004661	8697	CDC23	cell division cycle 23	1.14271	0.192458	0.0012314	0.0142871	4.67674	8.34519	11.551	12.4858	11.8136	12.4774	10.701	16.0695	21.0337	10.9393	10.1022	7.45658	13.9671	15.0964	16.0262	7.45957	7.94385	6.99425	10.3058	12.0181	11.9949	6.67304	5.95817	9.08753	11.6541	10.7559	11.6346	3.04653	3.78362	5.37546	10.3518	9.91176	9.37072	13.0232	10.5383	12.2014	7.93276	6.12702	8.77091	4.62276	4.78126
22q12.2	NM_080430	140606	SELM	selenoprotein M	1.1928	0.254356	0.00123115	0.0142871	80.0927	133.148	87.3366	86.2052	59.1218	43.2419	63.4399	69.1547	66.6722	55.8547	58.4953	59.9452	33.4706	39.1999	46.1706	15.4389	9.9699	12.0412	45.2308	33.1941	46.212	21.1441	33.5892	22.3587	50.2229	63.0705	68.3009	79.8083	71.3277	30.6201	59.3362	56.0077	60.6171	50.3162	50.5457	33.7867	38.1219	27.8889	30.9215	70.2681	82.2169
9p21.1	NM_001497	2683	B4GALT1	UDP-Gal:betaGlcNAc beta 1,4- galactosyltransferase, polypeptide 1	1.45066	0.536705	0.00123441	0.0143044	6.2594	18.8856	21.2708	18.0673	13.9141	12.565	3.30766	2.24934	27.4457	6.28831	5.54678	4.09854	10.5685	4.31693	9.78668	0.546494	0.533429	0.560025	9.88028	8.24464	10.6541	3.38503	2.27883	2.61454	11.3376	12.8043	12.9699	8.35396	6.32697	8.35379	11.4555	9.41488	9.77233	14.0904	11.1595	9.11922	7.26706	5.91687	5.71163	4.70741	4.92048
9q34.11	NM_004878	9536	PTGES	prostaglandin E synthase	1.44828	0.534336	0.0012372	0.0143044	9.29844	7.06314	17.1036	13.4674	13.4925	10.4054	6.01078	3.24317	30.6694	9.88466	10.5059	8.58726	9.8047	5.72415	7.25743	2.13301	1.99324	1.49814	7.55772	5.97024	7.8784	3.17187	4.468	4.97261	12.0223	16.0529	13.6426	5.92008	7.43607	3.68427	12.2458	9.89549	9.89492	13.4767	9.14998	7.55182	4.87772	2.24424	2.66026	6.24632	4.33223
11q13	NM_031492	83759	RBM4B	RNA binding motif protein 4B	0.825918	-0.275929	0.00123697	0.0143044	4.02656	9.12068	7.59404	5.36538	9.28249	9.89417	9.19033	13.9923	8.24312	9.3224	13.2042	11.2365	14.9581	14.2948	14.2202	16.3323	16.8627	14.2647	10.1782	10.8059	10.0222	10.5514	8.04356	11.1403	11.5736	10.283	11.3142	6.36641	5.42371	10.4141	9.53786	9.26858	7.48797	10.8268	10.482	11.1094	11.416	10.8003	11.5363	6.58969	6.35446
12q12	NM_001025356	196527	ANO6	anoctamin 6	1.24185	0.312493	0.00123921	0.0143112	3.56738	7.28133	15.4449	12.1608	13.6053	14.2153	4.68705	5.27299	30.1416	6.07841	5.95822	2.65031	13.8228	8.3889	13.6379	2.92241	2.75329	2.49987	10.9493	10.8405	10.5436	4.46402	3.44992	6.06556	13.8726	11.047	11.2387	4.40306	4.22596	7.58591	8.88274	8.24853	7.99427	12.0264	8.18387	10.8973	7.9878	5.79461	8.15035	4.24779	3.88843
17q11.2	NM_003885	8851	CDK5R1	cyclin-dependent kinase 5, regulatory subunit 1 (p35)	0.581014	-0.783354	0.00124614	0.0143746	15.3185	8.68919	4.28761	2.89329	7.63155	10.8872	18.6835	8.13781	0.8962	27.6483	28.4823	36.2141	7.32614	10.9255	4.53337	46.8235	48.2452	48.0679	7.62594	6.01016	6.03966	24.4807	25.2181	21.5983	11.7343	10.6795	11.5475	16.1357	14.5973	11.5573	15.7589	20.1581	17.4625	10.6651	18.1011	13.3756	15.599	22.0289	16.646	11.3403	11.8308
16p13.3	NM_001089	21	ABCA3	ATP-binding cassette, sub-family A (ABC1), member 3	0.669618	-0.578589	0.00124765	0.0143753	16.3293	8.81235	3.97493	3.63397	3.54855	4.36216	14.3728	2.93218	1.89975	6.73742	6.79489	7.48536	3.6462	6.82071	3.58109	17.0825	16.6922	18.5793	6.29122	4.978	5.7419	12.6038	12.3872	10.5317	6.7652	8.1877	9.65042	17.867	14.7625	9.00556	8.53442	9.99503	10.2115	8.38496	11.787	7.46382	11.2628	13.528	11.5676	11.5639	13.1148
12q13.13	NM_002205	3678	ITGA5	integrin, alpha 5 (fibronectin receptor, alpha polypeptide)	1.35125	0.43429	0.00124987	0.0143843	16.9858	24.3509	22.0503	18.365	17.5028	15.5838	10.5888	3.61985	20.1609	8.96754	9.32986	7.02479	17.3587	13.3974	14.0503	1.77774	1.72008	1.79137	13.1838	11.0308	14.0093	8.92365	7.08582	7.97536	11.4002	13.0159	14.5827	13.8032	15.5084	11.0834	15.7281	11.56	12.8877	18.2781	13.3586	9.75749	7.16004	4.24009	5.37347	9.36401	8.68525
12p13.31	NM_000014	2	A2M	alpha-2-macroglobulin	1.32554	0.406581	0.00125485	0.0144068	5.36189	3.78184	30.2784	16.079	11.7225	10.3705	2.67642	2.64597	3.02838	3.46573	3.05233	2.37136	12.4075	6.93467	9.88836	1.14617	1.20365	1.0397	5.8391	5.09011	8.22317	5.7895	4.12507	5.96103	5.34478	5.48788	5.82264	2.54226	2.49143	7.00785	8.94634	6.64005	6.50397	13.1368	8.20152	10.003	3.61123	2.30633	2.84094	2.04062	4.37989
17q21.2	NM_021939	60681	FKBP10	FK506 binding protein 10, 65 kDa	1.109	0.149266	0.0012553	0.0144068	99.5867	171.649	155.763	129.897	143.897	115.129	55.4896	20.272	104.454	74.1142	75.2429	58.1856	72.0814	58.8365	53.5907	13.5494	14.4394	14.9705	76.2571	71.3856	76.3092	57.5668	48.9288	49.844	109.579	120.214	124.734	81.8415	88.1099	50.021	105.974	96.2131	92.9785	129.423	101.725	69.1722	55.4357	38.4564	41.4397	64.64	54.831
9q34.2	NR_015427	266655	LINC00094	long intergenic non-protein coding RNA 94	0.869204	-0.202233	0.00125615	0.0144068	7.86499	8.4195	5.84431	5.59276	6.19367	6.09818	7.84207	4.80837	5.68569	6.66651	6.89268	6.8029	6.86473	6.99025	5.68233	8.32888	8.39206	8.52176	8.89877	7.53053	8.95357	7.63947	8.30245	6.6633	7.59296	7.68181	8.10315	11.1649	9.7517	8.62866	8.13839	8.68068	7.43032	7.16754	8.38487	6.42119	9.1202	9.42706	8.12641	6.7031	7.72648
10p11.23	NM_020848	57608	KIAA1462	KIAA1462	1.46076	0.546719	0.00126005	0.0144349	1.9308	4.63957	5.1308	2.40369	3.97672	5.211	0.975103	0.699223	5.1951	1.57465	1.85543	1.52591	3.67313	2.64627	3.67993	1.12155	1.00996	1.18356	2.68106	2.34963	2.8807	2.45316	1.47023	1.92613	4.18853	3.57769	3.37731	1.21386	1.3329	2.39489	2.79116	2.40784	2.37898	4.24402	2.79409	3.20535	2.03361	1.28957	1.90515	1.0633	0.990527
9q22.32	NM_007001	11046	SLC35D2	solute carrier family 35 (UDP-GlcNAc/UDP-glucose transporter), member D2	1.46679	0.552659	0.00126238	0.0144449	1.68621	2.46317	16.1353	16.4289	6.27912	4.63864	2.27327	1.25994	16.1846	3.39765	4.52034	2.86805	6.05533	5.40762	4.8888	0.453246	0.400944	0.094068	6.85499	7.90035	8.63327	2.09382	2.07289	1.91041	5.15465	4.19539	4.26418	1.28844	1.27055	4.12421	5.1355	3.92453	2.90049	4.87138	4.33907	5.30547	3.46261	1.88817	2.21985	2.43073	1.45134
Xq22.1	NM_021029	6173	RPL36A	ribosomal protein L36a	1.04181	0.0590859	0.00126542	0.0144632	247.536	434.058	694.763	644.191	590.374	441.698	277.686	570.077	445.374	410.535	466.123	430.014	454.729	404.698	423.674	222.389	196.172	160.251	364.855	359.041	346.597	198.966	332.181	305.325	419.313	366.919	375.951	144.077	149.717	168.048	429.943	415.532	362.101	361.405	347.389	407.006	273.047	185.165	252.465	305.943	235.342
1p22.1	NM_001938	1810	DR1	down-regulator of transcription 1, TBP-binding (negative cofactor 2)	0.811185	-0.301897	0.00127998	0.0146071	7.14586	15.1799	12.6303	11.4871	12.6641	15.941	7.66738	9.75362	15.0176	13.9691	16.5385	15.278	16.4043	18.3972	15.1888	22.131	22.0318	17.4397	14.4762	15.7453	15.948	12.2588	17.2376	15.3959	20.4162	14.8074	14.6085	9.49756	8.15162	20.3672	13.4043	14.1027	11.7733	16.961	17.1127	17.4684	30.2302	22.9886	27.6914	15.1863	10.6524
17q21.2	NM_018143	55175	KLHL11	kelch-like family member 11	0.829501	-0.269684	0.00128094	0.0146071	2.49246	5.18642	2.78993	2.71249	3.38641	5.32519	3.13472	4.22284	5.15182	6.03753	6.9029	5.45762	5.00727	5.31621	5.24827	6.78506	6.65989	6.97319	4.64712	5.03676	5.45283	4.6116	4.53109	5.3507	5.71418	4.64058	4.99595	2.67157	2.06906	4.58289	4.47325	4.89175	4.70408	5.06879	5.27905	6.13406	4.50543	4.1928	4.77552	2.95272	3.01806
1p21.1	NM_001854	1301	COL11A1	collagen, type XI, alpha 1	1.17719	0.235352	0.00128326	0.0146168	6.1837	284.624	11.2582	4.46403	24.2758	35.3425	4.87308	3.27368	5.15938	8.26935	8.83398	6.33354	14.227	15.0705	21.8185	2.79799	3.65387	3.12511	6.95624	6.41195	5.05774	6.92889	4.81712	5.1618	18.4495	14.6011	12.1983	3.74907	6.8356	8.45657	10.354	9.71917	9.26392	16.2382	10.3206	10.3069	7.84423	5.63141	7.14436	4.66631	5.80053
15q25.2	NR_033787	440299	DNM1P41	DNM1 pseudogene 41	0.810353	-0.303378	0.00128866	0.0146519	3.12161	3.01794	1.62349	1.45852	1.78588	2.30792	2.67788	1.10002	1.18337	1.66877	1.24364	1.69202	1.73958	3.05538	2.73722	3.99406	4.18532	3.88422	3.24035	3.19526	2.56279	3.69904	2.40859	2.23285	2.49302	2.81145	3.13199	5.27766	5.21236	3.37381	3.0842	4.04878	3.76939	2.83902	2.60425	2.05136	2.16819	3.55073	2.33069	1.78996	2.6925
17q25	NM_014595	30833	NT5C	5', 3'-nucleotidase, cytosolic	1.35879	0.442317	0.00128927	0.0146519	17.9095	14.4061	15.3807	14.6089	9.68475	7.3274	18.4727	10.2745	11.813	7.17126	7.33777	4.5543	3.85139	10.1919	7.41571	5.95456	5.74899	4.79138	7.32679	4.82144	4.69942	8.20979	11.6042	5.67773	10.0301	11.955	13.1783	9.78263	9.67601	3.72162	9.5816	8.88239	6.73691	10.2728	11.9083	7.85331	6.91547	5.34289	5.68276	10.4872	8.7001
14q12	NM_016106	23256	SCFD1	sec1 family domain containing 1	1.12418	0.168867	0.00129295	0.014677	4.72722	10.3686	15.7758	19.516	14.3903	18.8472	9.17594	18.1976	23.7185	9.92018	9.41477	9.86869	14.6863	16.1531	17.9781	10.7039	9.58262	8.74029	9.49757	10.3047	11.93	8.26376	7.61366	9.96943	15.2326	16.4504	12.808	4.52692	4.6231	9.77793	12.8342	11.8123	12.001	17.439	14.3941	16.2119	11.871	8.53714	11.5302	7.93964	8.66047
6q22.1	NM_003309	7259	TSPYL1	TSPY-like 1	0.839276	-0.252782	0.00129743	0.0147111	9.54537	10.3207	17.087	10.8642	13.9444	16.6736	7.79807	9.41718	19.2417	17.2676	26.1363	24.2258	11.2612	15.2948	11.9994	25.3788	24.9351	24.9359	19.2206	19.9246	21.0948	14.1867	14.342	12.6534	20.373	12.8814	12.0532	12.2719	10.3665	21.9364	14.4428	17.5566	13.165	14.8299	14.6378	13.5934	19.1951	18.7691	19.2448	10.2704	9.18288
7q36.1	NM_001099220	643641	ZNF862	zinc finger protein 862	0.829827	-0.269118	0.00129916	0.014714	3.91888	3.38846	1.86922	1.36765	1.91258	2.09712	3.57118	1.44805	2.3135	2.58538	2.87468	2.78572	1.89835	2.3254	1.78297	3.75006	4.13704	4.32088	3.03302	2.84269	2.47187	4.26547	3.42564	3.10942	2.72599	2.89556	3.21387	4.17059	3.79403	3.05813	2.93084	3.27502	3.25598	3.43335	3.41428	3.04058	3.25845	4.37817	3.34442	2.7029	3.05966
6p12.2	NM_014051	28978	TMEM14A	transmembrane protein 14A	0.828018	-0.272265	0.00130315	0.0147424	15.421	17.4234	13.1701	13.3663	11.599	13.2308	15.0542	27.9105	7.35843	22.5348	20.1118	20.1918	13.7011	17.1801	13.2991	32.4198	31.7757	31.2695	10.6867	9.56339	10.4321	18.3732	27.1712	20.0929	18.973	22.9014	21.0547	27.124	21.7994	18.7958	13.2049	15.1196	13.4745	18.2196	21.0891	13.6281	25.1637	21.6546	23.2587	24.6684	23.906
1p34.1	NM_001012	6202	RPS8	ribosomal protein S8	1.06089	0.0852688	0.00131313	0.0148386	1862.63	2711.78	2265.31	2422.99	2538.09	1849.48	1368.96	2494.33	1434.11	2110.54	2020.16	1857.33	1556.92	1695.01	1579.24	942.068	845.077	779.398	1566.11	1355.24	1477.4	1197.6	1623.34	1353.31	1962.43	2012.86	1982.94	1535.93	1619.36	870.863	1958.42	1838	1738.99	1816.7	1836.65	1646.76	1371.1	1109.85	1261.77	1646.28	1498.94
10q22.1	NM_000917	5033	P4HA1	prolyl 4-hydroxylase, alpha polypeptide I	1.02049	0.0292568	0.00131708	0.0148663	15.0296	72.2704	59.3906	46.5141	94.9727	103.318	28.7398	67.3975	32.8849	45.3493	37.7925	25.6993	87.0227	57.369	71.9917	21.767	20.3617	17.6579	35.6211	45.3364	41.8335	20.9235	16.5913	36.2889	77.0209	70.9649	69.3621	16.2332	18.0235	26.6061	42.7662	36.7147	43.3791	64.0998	58.3895	78.5316	61.3392	50.3808	70.2229	30.906	32.2388
14q22.1	NM_016039	51637	C14orf166	chromosome 14 open reading frame 166	1.05436	0.0763716	0.00131899	0.014871	35.2214	70.4364	104.072	131.314	86.7481	79.4877	60.5917	117.212	109.498	79.2	83.0406	60.5492	89.941	83.5566	91.112	50.7696	38.6102	38.6915	63.315	65.6154	77.6068	33.1421	41.9941	49.1697	79.44	66.2292	77.7822	22.9786	23.1832	53.0298	66.0726	64.1241	61.4434	79.877	70.012	85.582	64.0736	42.9926	65.9741	45.6343	44.2192
19q13.31	NM_145296	199731	CADM4	cell adhesion molecule 4	0.750371	-0.414324	0.00134079	0.0150994	71.9133	29.8912	14.2034	14.1342	15.584	19.647	43.9045	15.9778	6.64972	31.9861	32.5888	35.2354	12.1129	32.2865	17.8973	49.8203	49.5129	48.1498	19.2199	16.1962	16.7719	39.9088	48.432	40.2274	23.2922	25.6879	35.8005	64.9547	60.9009	33.1	35.0462	37.7576	33.0204	30.2764	38.4019	26.3621	32.5033	37.0535	33.6556	33.7324	39.5997
2p23.3	NM_177983	5496	PPM1G	protein phosphatase, Mg2+/Mn2+ dependent, 1G	0.89568	-0.158945	0.00134366	0.0150994	22.3974	22.7677	28.861	12.0778	23.9711	24.6682	22.6368	15.3511	27.0244	21.1495	27.3233	26.3141	28.2427	31.8827	26.5558	32.5029	32.3246	30.9691	30.9214	25.32	28.4293	23.3647	23.214	17.6859	22.5885	23.8998	24.432	19.5202	20.958	23.5443	25.0325	27.6809	23.0929	26.0242	21.9768	23.2485	23.9347	25.0669	25.216	16.3993	15.2371
6p21.31	NM_007271	11329	STK38	serine/threonine kinase 38	1.13874	0.187439	0.00134378	0.0150994	2.87022	4.97667	7.59166	5.76345	8.96703	9.37333	4.65946	5.91084	11.1141	5.89747	5.47053	3.32404	10.984	5.85693	9.08758	3.06674	3.20535	3.26764	9.33833	9.93297	9.50224	4.05315	2.38466	4.77404	9.70979	7.78552	8.32028	2.57503	2.49337	3.1481	7.15206	6.44664	7.29181	8.94036	6.31841	9.30794	4.7686	4.10206	4.43487	3.35851	3.26558
13q21.1	NM_001040429	27253	PCDH17	protocadherin 17	0.772294	-0.372778	0.00134656	0.0151136	2.15916	3.5117	3.09229	2.07026	2.74196	4.05042	2.27078	1.72854	4.31754	2.78333	4.06119	3.239	4.09044	3.2417	3.07621	5.74254	5.30376	5.13707	3.8169	3.5172	4.80823	6.04542	6.36443	6.13049	5.44308	4.15911	4.44185	4.06487	3.28358	7.35766	3.86504	4.0503	3.83844	5.17798	4.7054	4.3648	3.95522	4.55908	5.31538	2.24235	2.30664
1p36.21	NM_017556	54751	FBLIM1	filamin binding LIM protein 1	1.54928	0.631596	0.00134939	0.0151283	6.96107	12.2315	13.0797	10.1538	10.7388	6.84384	6.34279	1.60322	16.4895	6.40899	7.59989	6.31464	4.07917	5.11145	4.15489	3.3513	2.65559	2.50906	8.27369	6.80935	7.97417	3.62439	2.74017	2.50139	4.14799	4.31311	5.60618	4.92287	5.66284	4.25759	7.56748	5.12017	6.28876	6.06708	4.69392	3.53984	3.14056	2.56016	2.1678	4.55021	4.03579
13q34	NM_001845	1282	COL4A1	collagen, type IV, alpha 1	1.38873	0.473769	0.00135265	0.0151348	48.6869	61.9744	103.817	55.233	48.722	54.2671	23.2703	10.3644	83.2392	21.3129	23.5357	14.7962	23.0737	33.85	31.0808	7.84345	8.65608	7.46429	25.8251	27.3351	27.8522	33.7974	22.0957	29.6872	30.9049	29.5329	29.3642	40.0675	36.8436	36.374	33.5072	29.7444	30.0382	31.5898	24.1041	17.4591	13.6888	6.64796	9.31362	12.8503	10.9468
15q22.31	NM_000942	5479	PPIB	peptidylprolyl isomerase B (cyclophilin B)	1.07822	0.108658	0.001353	0.0151348	127.591	203.115	228.136	92.6296	232.248	205.186	85.1736	111.131	168.03	114.851	106.296	78.0667	147.26	90.1078	91.0656	60.3835	54.5054	56.0909	104.742	97.6535	104.83	79.5126	71.9107	67.1355	127.437	151.145	139.715	116.273	122.946	86.4456	111.172	102.648	82.2333	159.725	106.013	87.7614	101.28	77.404	89.0326	90.4024	80.0244
12q24.31	NR_002809	338799	AC084018.1	uncharacterized LOC338799	0.772081	-0.373176	0.00136543	0.0152057	2.67611	2.15643	2.55281	1.74754	2.30875	2.35703	4.81477	4.12579	2.16766	5.52824	5.46245	6.53539	3.88908	5.2047	3.62258	3.50585	3.94536	3.90228	3.80751	3.72123	3.47962	7.02131	4.60939	4.73727	3.08133	2.79831	3.35741	4.67767	5.21853	2.55636	4.06391	4.18839	4.59312	2.72215	2.88808	3.84563	4.24839	5.21169	2.85342	2.63645	3.48228
4q31.22-q31.23	NM_001957	1909	EDNRA	endothelin receptor type A	1.19297	0.254553	0.0013628	0.0152057	3.89648	8.88038	7.25194	7.14971	9.19832	10.3359	4.32477	5.22721	3.22537	3.35254	6.4116	3.57248	10.8408	14.1874	12.7466	1.5294	1.15706	0.948913	4.68933	3.84125	4.88305	6.53223	5.08385	7.85237	11.2023	7.46002	7.83948	2.61589	3.61687	10.5865	7.4267	5.68341	6.41574	11.614	7.62445	8.56538	4.52166	2.06715	3.53965	3.42052	2.99495
6q15	NM_080743	135295	SRSF12	serine/arginine-rich splicing factor 12	0.7893	-0.341355	0.00136438	0.0152057	1.42551	2.75906	2.29567	2.486	2.54492	2.82254	2.13616	4.01204	1.6046	3.64786	4.39891	4.22408	3.29372	4.0392	2.92954	6.5959	5.60273	4.67564	2.91125	3.05887	3.1015	2.67842	3.94185	4.05981	3.69081	2.41349	2.91305	1.90881	1.55561	3.48281	3.28442	3.55749	3.0989	3.09473	3.80251	4.71431	3.67978	2.98292	4.12744	2.507	2.38005
22q13.33	NM_020461	85378	TUBGCP6	tubulin, gamma complex associated protein 6	0.812913	-0.298828	0.00136356	0.0152057	6.46642	7.30829	4.39191	3.4537	4.30966	3.65975	7.03323	2.58385	6.91482	5.88252	5.76674	6.7207	3.09342	5.68423	4.65937	8.24833	9.95712	9.7186	5.86773	5.33103	5.20311	9.76965	4.76686	6.65975	6.56403	6.91897	7.54543	10.8908	9.19341	5.7363	7.84417	8.04038	8.34903	6.84134	6.29658	5.53629	5.56233	7.63299	5.8262	5.14828	6.17848
14q11.2	NM_017924	55017	C14orf119	chromosome 14 open reading frame 119	1.14147	0.190895	0.00136819	0.0152108	6.78971	10.0271	17.1463	16.9663	13.2793	11.8781	9.66868	17.4032	19.2135	13.6451	16.4277	12.5533	12.8508	12.2525	11.6959	8.95588	8.98545	8.10434	12.0256	11.0122	12.0102	5.74088	7.63485	7.32923	12.404	10.4977	10.8963	5.96319	5.81241	9.27267	10.9903	11.8445	9.3307	13.3412	9.21188	9.30721	11.1885	8.73525	11.3422	8.52793	6.89412
1q21.3	NM_080388	140576	S100A16	S100 calcium binding protein A16	1.70371	0.768676	0.00136894	0.0152108	9.18046	13.4886	18.9181	19.4274	16.4783	13.7619	7.81448	8.04708	13.8364	5.60354	6.40117	4.55393	7.10323	10.3122	9.21833	8.61342	7.47042	8.44915	7.76595	6.71996	7.32495	7.39716	8.13267	6.06363	8.56986	11.0566	12.7611	4.91443	4.256	3.12356	6.92265	4.93482	5.49982	13.2697	9.10941	5.60413	4.43841	1.63374	2.54779	5.28203	2.74848
2p25.1	NM_014746	9781	RNF144A	ring finger protein 144A	0.78866	-0.342524	0.00137052	0.0152114	6.03781	9.8281	5.70732	4.85795	5.25362	6.86137	5.68915	3.95983	2.41195	6.87947	8.16248	7.87656	7.64883	10.0942	8.26497	10.5704	10.7092	10.4194	7.53582	7.39544	7.45806	8.5791	7.52794	8.28748	7.10909	6.17763	6.82554	5.41273	4.46763	7.20141	7.55157	7.96953	7.52535	5.3427	6.833	6.11472	7.73678	8.84061	7.39105	5.74733	5.97911
3q13.2	NM_199511	151887	CCDC80	coiled-coil domain containing 80	1.34022	0.422473	0.00137337	0.0152232	3.97133	12.4134	7.08293	2.33616	17.289	19.2673	6.35979	4.86304	15.6562	5.47957	5.73802	3.00236	15.0523	7.74273	12.0004	4.519	4.03064	4.42823	9.01146	9.34244	9.28119	6.41423	3.77786	5.79668	13.4218	11.3004	10.4065	1.42573	2.07726	3.99125	7.60619	7.0292	5.17984	13.2827	6.92891	8.87097	4.92505	2.6247	3.60989	3.28236	2.16226
1p34.3	NM_031280	64960	MRPS15	mitochondrial ribosomal protein S15	1.11346	0.155051	0.00137616	0.0152232	13.9234	27.2952	53.3073	45.6229	35.6247	29.7779	20.9197	31.4309	61.5563	23.3554	27.1912	24.0354	35.8738	32.4767	25.08	20.9019	17.6236	15.8229	28.6896	27.4876	29.3288	14.6001	15.9511	16.2212	26.8092	24.8158	23.2582	18.5035	15.8804	19.6213	25.6677	25.856	21.9965	29.0379	23.0632	22.8502	30.0266	24.7542	25.5129	23.811	16.3837
19p13.12-p13.11	NM_003290	7171	TPM4	tropomyosin 4	1.11214	0.153344	0.00137578	0.0152232	30.8342	71.62	120.091	94.8663	114.1	131.057	35.7803	42.3696	139.287	70.3644	79.189	48.7613	100.668	73.5778	75.9814	35.7928	33.3228	33.1295	65.986	67.4363	69.7898	33.7087	23.6742	33.9067	89.2396	68.4015	67.247	23.5088	20.1748	38.7444	60.0929	50.8874	45.1712	77.8739	45.396	57.0655	36.5724	23.0365	34.7009	27.8365	22.7521
22q13.33	NM_012324	23542	MAPK8IP2	mitogen-activated protein kinase 8 interacting protein 2	0.70555	-0.50318	0.00138547	0.0152922	12.3538	4.46981	3.07846	4.27576	3.37698	3.79715	13.8947	5.64383	1.21117	6.53135	6.45382	7.09259	5.44621	5.84048	3.20755	13.8617	12.8785	17.1647	6.3688	4.51832	4.69149	10.7945	11.0457	8.05213	6.06782	7.38882	8.94992	10.1523	9.22482	4.35974	6.27426	7.43421	7.55981	5.52257	9.45345	6.3584	6.20832	7.96487	6.4846	8.89584	11.5397
14q11.2	NM_019852	56339	METTL3	methyltransferase like 3	0.879306	-0.185563	0.00138536	0.0152922	11.4724	12.5493	11.5847	12.511	9.96867	11.3271	14.8072	18.3862	11.6329	13.4321	14.7043	13.639	15.4888	18.7202	15.8261	14.8493	13.6571	15.2383	16.1739	15.2763	14.2878	15.1805	17.2549	14.8005	13.4638	11.4732	12.2423	10.6105	12.1662	14.3565	12.9708	14.2101	14.0651	17.1551	15.9949	13.4631	13.9089	13.1135	14.3904	16.0177	17.096
22q13.1	NM_152243	11135	CDC42EP1	CDC42 effector protein (Rho GTPase binding) 1	1.49201	0.577261	0.00138746	0.0152973	14.5882	20.7661	27.3918	20.6928	16.6232	14.4999	9.27538	3.30763	28.9194	11.6087	13.6497	10.2103	14.3215	6.45104	7.90871	2.18599	2.1315	1.94044	14.0415	11.3429	16.6012	6.42311	4.53244	6.26813	12.8059	13.2117	14.4375	13.9014	13.9522	7.81813	13.8282	9.83789	11.5987	14.4349	10.1061	6.69759	5.30943	3.88456	4.66634	7.41664	5.72947
11p15.5	NM_001098787	51272	BET1L	Bet1 golgi vesicular membrane trafficking protein-like	1.26479	0.338895	0.0013931	0.0153426	15.4306	25.9548	22.1267	16.4695	16.6515	14.5265	12.577	4.14851	23.0719	13.3525	13.1036	8.47881	11.5386	12.0625	11.7959	3.94894	3.64327	3.88583	11.4571	9.82103	11.5547	6.95626	6.31815	6.84295	15.6684	16.2929	17.2186	18.6449	14.5363	9.33567	15.8208	15.2966	14.4751	15.7394	13.9351	9.422	9.00293	8.1898	7.03839	8.09513	9.085
10p13	NM_031455	83643	CCDC3	coiled-coil domain containing 3	2.30645	1.20568	0.00139671	0.0153485	5.43326	9.50534	9.52178	7.96299	8.8552	8.21832	10.6131	6.98283	4.65408	1.60176	2.44103	1.1584	4.56515	2.21376	3.05709	1.14057	1.26003	0.562256	1.85953	2.08762	2.42576	6.70091	7.50269	6.16455	4.96645	5.00901	5.00288	12.2791	10.604	8.26483	3.83484	3.00428	2.53202	6.79951	3.31776	1.55134	2.20761	0.822516	1.08869	1.99232	2.26992
12p13.31	NM_001131024	5830	PEX5	peroxisomal biogenesis factor 5	0.825224	-0.277143	0.00139602	0.0153485	6.19926	7.02412	3.72481	3.1947	4.49573	4.70523	5.3359	5.29403	4.47406	7.53243	9.76416	9.32779	4.21462	7.46229	4.46895	10.3223	11.0522	10.1823	5.09939	4.97089	5.57026	7.72278	5.75234	5.13851	5.4312	3.53884	5.19716	5.86211	5.78072	7.66476	7.06292	8.51008	8.31665	6.3789	7.90796	5.37081	5.43333	7.72654	6.17546	4.62639	4.60789
16q23.3	NM_019065	54550	NECAB2	N-terminal EF-hand calcium binding protein 2	0.623508	-0.681519	0.00140239	0.0153939	18.1158	9.87099	3.51065	4.93555	3.19413	3.56768	16.5943	6.67846	1.07087	4.33624	4.81541	4.12948	5.01801	17.0677	5.89907	17.6053	16.1003	16.1198	14.7161	11.4979	12.9384	12.857	16.3676	14.0666	17.1777	17.5412	23.2464	18.065	16.8281	9.1783	7.44226	6.96224	6.28736	12.8097	15.9726	13.2735	7.85873	9.51682	7.39857	16.9066	17.6673
16q21	NM_001797	1009	CDH11	cadherin 11, type 2, OB-cadherin (osteoblast)	1.08595	0.118954	0.00140581	0.0154145	17.5485	68.5496	90.2442	42.0344	128.174	128.16	15.6688	14.7291	74.3549	27.9374	45.9523	24.8062	90.0213	40.5787	53.2889	14.8306	15.1158	14.1259	39.4325	41.9783	36.7111	26.5906	17.8459	25.7155	95.8826	87.4227	68.6552	15.6771	18.0219	46.7449	55.3781	46.4968	37.2787	105.031	55.6326	63.6515	35.9339	14.3259	27.3127	21.3513	14.7235
4p15.2	NM_001145432	389203	SMIM20	small integral membrane protein 20	1.0846	0.117164	0.00140816	0.0154233	10.9915	22.2684	24.8472	26.493	21.7013	16.906	11.0311	19.748	21.729	18.3041	18.3949	18.2546	17.5425	16.5784	15.0079	8.49937	7.89234	5.93141	21.6162	19.4421	23.3029	9.55951	15.1112	12.8238	15.2154	16.987	14.4337	10.3732	11.0231	12.2286	22.7872	19.1807	18.5829	18.0646	20.1044	17.0556	19.5018	14.5192	16.7272	20.7942	16.8342
19q13.2	NM_021102	10653	SPINT2	serine peptidase inhibitor, Kunitz type, 2	1.20639	0.270695	0.00141234	0.0154521	80.7315	71.5305	124.355	112.713	71.2593	55.7358	65.122	44.4275	195.604	48.5275	51.3301	41.6283	22.7765	34.2942	34.091	35.0204	31.7452	33.7941	48.7808	43.1628	50.5064	23.572	26.0775	22.7099	44.5885	56.5977	60.7607	80.6789	67.1085	36.1571	51.9143	49.4363	49.3032	70.4642	52.0006	37.8646	31.1454	24.8164	27.73	52.0186	52.7062
5p13.3-p13.2	NM_030955	81792	ADAMTS12	ADAM metallopeptidase with thrombospondin type 1 motif, 12	1.26748	0.341965	0.00142065	0.0155232	2.64408	5.37374	8.01985	3.82555	7.56241	8.56252	2.71759	2.10545	6.02888	2.75556	3.10088	1.71969	4.61021	3.52995	6.27384	0.94777	1.00882	1.17956	3.18261	3.93015	3.35429	2.81574	2.10177	2.52114	8.03559	7.82406	6.87656	3.30011	3.08406	6.2051	5.88351	5.66822	4.55014	8.39621	5.20777	3.57225	3.10374	3.08779	2.89053	3.28694	3.56799
7q36.2	NR_028090	202781	PAXIP1-AS1	PAXIP1 antisense RNA 1 (head to head)	0.899121	-0.153414	0.00142423	0.0155232	3.05229	2.1378	1.91023	2.02398	1.09585	1.40214	2.3706	1.70122	2.86085	2.72619	2.43024	2.79641	1.75565	2.49059	2.15101	2.81171	3.10493	3.12143	2.55194	1.80334	1.80383	2.68906	2.326	2.77793	1.78416	2.27273	2.18829	3.45141	2.49985	1.80016	2.9245	2.34488	2.45085	2.22405	3.06194	1.65424	3.95201	3.0322	2.93977	2.28069	2.59232
5q22.1	NM_138773	91137	SLC25A46	solute carrier family 25, member 46	0.807637	-0.308221	0.0014243	0.0155232	3.1044	6.40539	7.50185	5.73101	7.11883	8.81476	4.88744	10.1475	10.9952	10.7921	12.154	10.7389	10.7192	12.2854	10.6871	15.1731	14.5947	12.9928	8.23226	10.107	10.6581	7.52482	9.77643	10.3312	9.40482	9.02515	8.11773	4.43623	3.40454	9.20416	8.195	8.02092	7.21963	9.22312	9.70844	9.22832	10.5924	8.4497	11.8404	6.50757	6.21388
14q32.12	NM_020818	57578	UNC79	unc-79 homolog (C. elegans)	0.779172	-0.359986	0.00142506	0.0155232	1.27235	1.00725	0.403792	0.35145	1.09325	1.91269	2.69418	2.49585	0.185737	1.63401	2.29873	2.26555	1.32911	1.6718	0.998604	5.68857	6.49776	6.2892	1.41197	1.59352	1.52516	3.9178	2.86689	3.45975	1.30545	1.42636	1.69144	1.20855	1.29636	2.16127	1.41816	1.75901	1.74424	1.35173	2.21774	2.10319	2.01762	2.94458	2.20191	1.43094	1.5822
[truncated: 9,062 more rows]
[truncated: 49 more columns]
