# Supplementary material for: Data integration of bulk and single-cell transcriptomics from cerebral organoids and post-mortem brains to identify cell types and cell type specific driver genes in autism
Source: Research Square preprint supplement (doi:10.21203/rs.3.rs-113869/v1), 2020-12-02
Supplement: Supplementary file 15 [file c5a1e2fc15d6a6320d21f075.xlsx]

## Sheet: 16p11.2 CellScores
Cluster	Description	SetA
		CellScore	P(CellScore)
6	-	0.797	1.6´10-4
9	Neuroepithelial cells	0.492	5.3´10-3
7	-	0.051	0.08
5	Neural retinal cells	0.115	0.35
1	Mesodermal cells	0.161	0.6
4	Cells with forebrain markers	-0.169	0.69
3	Dopaminergic neurons	-0.207	0.79
2	Astroglia	0.087	0.99
8	-	-0.556	1
10	Proliferative precursors	-1.66	1

## Sheet: 15q11-13 CellScores
Cluster	Description	CellScore	P(CellScore)
10	Proliferative precursors	0.535	0.017
6	-	0.22	0.078
3	Dopaminergic neurons	0.096	0.26
9	Neuroepithelial cells	0.046	0.35
8	-	0.035	0.4
4	Cells with forebrain markers	-0.023	0.64
7	-	-0.039	0.77
2	Astroglia	-0.236	0.92
5	Neural retinal cells	-0.323	0.98
1	Mesodermal cells	-0.646	1
