# Supplementary material for: Data integration of bulk and single-cell transcriptomics from cerebral organoids and post-mortem brains to identify cell types and cell type specific driver genes in autism
Source: Research Square preprint supplement (doi:10.21203/rs.3.rs-113869/v1), 2020-12-02
Supplement: Supplementary file 17 [file 52d2c3cc75f66ed0cffe5c41.xlsx]

## Sheet: Outlier transcripts (intra)
				FPKM
AccessionID	EntrezGeneID	Gene	GeneName	PGP1_1	PGP1_2	PGP1_3	GM23716_1	GM23716_2	GM23716_3	GM23720_1	GM23720_2	GM23720_3	GM25256_1	GM25256_2	GM25256_3	BYS0110_1	BYS0110_2	BYS0110_3	BYS0111_1	BYS0111_2	BYS0111_3	BYS0112_1	BYS0112_2	BYS0112_3	BXS0114_1	BXS0114_2	BXS0114_3	BXS0115_1	BXS0115_2	BXS0115_3	BXS0116_1	BXS0116_2	BXS0116_3	BXS0117_1	BXS0117_2	BXS0117_3	902_1	902_2	902_3	1601_1	1601_2	1601_3	1401_1	1401_2	1401_3	1001_1	1001_2	1001_3	901_1
NM_148912	83451	ABHD11	abhydrolase domain containing 11	3.44593	2.89871	4.58041	1.93166	1.34878	1.26352	2.7201	1.46334	3.97383	2.09995	3.66457	1.96982	4.63924	7.0386	6.58309	14.5184	7.74963	2.99482	6.30249	3.62867	7.27205	4.93157	6.95852	2.36329	5.58475	5.67661	5.84087	8.42233	6.90581	7.35022	2.31721	4.06033	4.22403	0.451108	4.2959	2.57666	1.85956	0.76812	2.42211	5.24714	2.17057	4.00609	7.10251	8.75615	9.55103	4.59234
NM_001146314	84836	ABHD14B	abhydrolase domain containing 14B	2.02229	1.80463	4.22091	0.675739	0.522766	0.640458	2.28009	2.49201	5.00344	1.91624	1.48233	0.000209	6.16994	7.41462	5.92179	5.80633	5.88704	3.76198	5.51358	5.31449	4.00459	4.85131	5.05187	0.908968	3.70617	3.14942	3.15204	3.74036	3.36651	0.894883	1.33933	0.173176	2.15702	3.55533	2.08859	1.61673	0.9154	0.700757	1.04827	1.81976	3.7683	1.72106	5.61048	5.19129	5.02991	4.89041
NM_001042473	91452	ACBD5	acyl-CoA binding domain containing 5	2.49573	5.22961	4.02644	2.29411	3.82343	2.82342	2.59245	2.99113	0.034269	1.52686	1.64396	3.93032	3.34989	0.276289	2.46359	0.848528	1.03604	1.39925	1.70556	1.87959	1.99129	3.58243	2.26587	5.48605	1.00232	1.47562	2.36376	0.001673	2.80564	2.20877	4.40683	4.2059	3.60624	2.64682	3.28078	3.07901	3.71883	2.28092	2.53674	2.43685	1.52828	1.50019	2.89363	1.09589	0.969016	1.0617
NM_001302622	43	ACHE	acetylcholinesterase (Yt blood group)	1.97106	2.45328	2.35114	5.24941	4.72459	5.41819	3.31197	2.66218	3.32954	3.34139	1.57307	2.65348	2.06134	2.95858	2.61984	2.97732	4.52368	2.00864	3.19555	2.84946	2.7287	3.44791	3.65045	0.935659	2.99404	3.94972	4.3884	4.15667	5.53286	4.80353	1.86094	0.035518	2.10996	1.75964	2.08194	1.34109	2.82301	2.54103	3.49542	3.22555	3.69842	2.61132	1.0315	1.72286	1.50486	0.423484
NM_181866	11332	ACOT7	acyl-CoA thioesterase 7	12.3693	16.9901	9.63138	22.6522	24.1521	22.6971	9.37084	8.37926	7.60942	14.1179	16.0684	12.6661	8.02534	12.38	15.107	17.0582	17.7329	7.15235	10.4398	7.15252	10.3452	13.6996	20.1814	17.1785	4.19918	15.1287	9.07969	16.9424	22.187	21.8938	14.5164	17.8173	20.0301	11.5955	10.1653	13.7119	14.9403	14.8005	17.8222	20.5084	20.0871	18.8318	9.52481	7.24041	8.39498	4.64683
NM_032501	84532	ACSS1	acyl-CoA synthetase short-chain family member 1	1.92542	1.59611	1.46226	2.16387	1.82637	2.38726	2.72451	2.42718	2.34241	2.74682	1.64879	1.8671	2.2972	1.55056	2.5577	2.68444	1.63662	2.24869	3.20676	3.12599	3.58716	2.09382	3.10087	2.11745	4.24635	3.75284	4.10532	0.579004	1.11804	0.704113	2.89095	0.072768	1.98144	2.10119	1.59179	2.13933	3.50871	3.98357	2.43097	1.60379	2.1814	1.00065	2.43415	2.48206	3.11304	1.09513
NM_001100	58	ACTA1	actin, alpha 1, skeletal muscle	2.33526	0.171545	4.36641	1.77494	0.512185	0.443027	0.31124	0.314064	0.130083	10.5438	3.35731	0.264014	5.39236	0.087984	0.169422	1.2811	1.79491	4.66786	11.2981	2.07991	1.18519	0.198679	2.31848	0.052389	0.252366	0.303029	0.204587	0.914802	1.85299	0.610049	3.46833	2.49664	0.434724	0.886042	1.17917	1.26406	2.02728	1.38737	1.05652	0.354492	1.08762	1.18717	0.319434	0.322316	0.848918	0.269885
NM_005159	70	ACTC1	actin, alpha, cardiac muscle 1	7.73749	0.469224	13.1343	1.85009	0.224034	0.069591	0.547209	0.316747	0.277411	18.2338	6.37161	0.332088	18.4793	0.529392	0.461952	3.06575	2.90896	13.2142	14.9848	4.12518	4.62274	0.299364	3.58205	0.118681	2.2673	3.06813	0.734009	0.999225	2.89605	1.02757	7.98367	10.717	0.430501	0.668392	3.98553	0.628407	3.6562	3.29667	2.84142	1.60482	5.46937	3.49944	0.257308	0.319629	2.81101	0.518326
NM_000666	95	ACY1	aminoacylase 1	5.17693	6.12978	6.38546	0.589587	0.004561	0.396974	9.68515	7.82103	9.22255	3.13965	1.82781	2.89541	7.9586	6.80536	7.51162	11.7493	9.04005	5.63683	8.0065	5.88525	7.12788	10.756	8.97476	5.14905	6.4705	4.08102	0.000354	6.212	7.03845	4.91605	4.40964	2.04445	1.51246	5.16058	4.48224	2.26061	1.15415	6.1e-05	1.14095	5.60447	6.64722	5.89632	6.95576	11.6154	9.80236	10.2526
NM_182920	56999	ADAMTS9	ADAM metallopeptidase with thrombospondin type 1 motif, 9	25.0261	5.69609	13.3648	1.30648	1.28463	1.23067	6.48613	7.79529	6.37277	5.41131	2.65287	4.56997	16.0842	12.5755	11.7158	2.27639	3.10136	6.33744	12.5379	9.49255	8.96295	20.8182	11.5963	10.6455	7.11811	4.05013	6.15772	3.31576	2.36495	2.92435	5.18749	5.0051	5.72272	5.77886	8.51879	4.52552	3.0843	2.45768	2.00067	6.85957	7.58891	11.1643	17.7396	20.2378	17.5621	33.4113
NM_001010982	125061	AFMID	arylformamidase	3.36768	2.59349	2.89819	2.94326	2.26761	0.012713	5.39347	3.32521	6.23647	4.13566	4.16388	3.7798	4.38481	2.93039	3.41258	5.68602	5.55382	3.06318	3.90385	5.38601	5.62129	0.009508	1.95649	4.06372	3.18325	1.96237	0.015536	0.04416	3.41876	3.15148	6.02414	2.38842	1.93517	4.92427	3.23927	4.09219	2.3663	5.25516	6.6956	2.03148	2.18439	3.08025	2.50476	1.81848	4.62528	1.74852
NM_001134	174	AFP	alpha-fetoprotein	127.342	87.5242	93.0862	0.069191	0.023414	0	152.518	246.697	206.984	41.338	48.3203	75.2682	56.2903	28.5318	84.7836	7.8248	16.6242	64.2423	164.734	74.9115	89.0328	127.128	152.411	153.26	88.4276	3.49154	81.6076	39.8996	38.0577	31.0238	168.847	175.381	171.393	111.825	111.555	50.4461	5.93314	4.72401	13.8204	138.254	160.817	275.291	89.5228	77.9583	84.2609	38.4138
NM_006408	10551	AGR2	anterior gradient 2	2.25925	1.52596	0.462749	0	0	0	1.51227	2.01769	0.632742	0.422098	0.678403	0.853844	2.49382	0.85657	4.5355	0	0.085352	0.313331	5.0936	0.58357	1.38302	0.563201	2.1284	1.60869	0.815889	0.515133	0.826402	0.738192	0.478451	0.606765	0.28118	0.086114	0.175788	0.447944	4.70841	0.154654	4.27948	0.797205	4.99677	1.14674	2.45081	2.34728	1.72075	2.79833	1.37113	0.793693
NM_000029	183	AGT	angiotensinogen (serpin peptidase inhibitor, clade A, member 8)	1.4629	1.06233	0.9373	0.894527	0.781222	1.19837	5.73358	5.10492	8.38658	1.67488	1.46359	1.42928	1.36057	0.869734	1.60507	2.52151	3.51715	3.4317	2.2	2.04419	1.40706	1.77519	1.77064	1.15415	2.39033	1.00499	1.69049	0.924648	7.87349	0.646106	2.4139	1.51795	2.30314	1.43244	1.31897	1.25823	0.924743	0.815068	0.993587	2.17079	1.92427	2.71035	1.50134	0.84356	0.963038	1.24244
NM_001622	197	AHSG	alpha-2-HS-glycoprotein	6.98902	5.25595	4.83015	0.061389	0.124589	0.208814	46.7939	40.788	57.4203	6.35315	6.68209	8.31741	7.60367	5.1411	11.1372	8.12861	16.2748	13.6333	15.9734	9.65113	8.80277	10.5576	7.15391	8.14972	0.666195	0.299676	0.385779	1.48557	24.6477	0.619393	20.54	12.8673	15.3685	14.0432	8.59604	7.57563	0.360518	0.093015	2.18657	10.8403	7.80045	25.8237	3.79467	3.45681	5.1791	1.48031
NM_203464	205	AK4	adenylate kinase 4	4.41016	4.81468	3.34165	3.29567	5.20549	5.50089	1.14871	1.68526	0.007883	5.53386	3.75923	6.85784	4.40613	4.32235	5.4415	3.91884	0.468233	3.42345	3.74115	2.48135	1.90127	3.60925	5.39336	5.9966	7.01229	4.43904	4.49688	3.11215	1.20287	2.39664	11.7411	10.2042	10.7867	0.141366	1.55177	3.9472	4.69327	2.29249	3.40104	3.1678	6.89304	6.52659	7.35694	3.41835	0.606385	5.92865
NM_001206646	56672	AKIP1	A kinase (PRKA) interacting protein 1	3.71129	2.17907	2.48109	4.04672	2.73409	4.71226	3.03017	1.84725	2.66649	3.24534	3.85921	4.27577	3.03007	3.14918	2.08433	4.85491	5.82932	3.23874	5.80428	4.17384	3.94948	5.33652	2.33007	4.26639	3.15979	5.39874	6.92666	5.29765	6.70929	0.873404	4.27452	2.63036	4.39258	3.67229	2.65043	2.11604	3.45635	2.81144	5.73996	2.13536	4.73224	4.47435	4.52954	4.29276	4.28834	2.53759
NM_001206729	10000	AKT3	v-akt murine thymoma viral oncogene homolog 3	19.0101	16.1668	12.1618	17.8437	18.1039	17.9323	22.4124	20.9412	22.9592	9.82698	2.82882	12.8323	11.8676	9.5104	9.95223	2.63201	3.12105	3.20949	9.22013	12.896	9.43377	9.07764	10.2536	18.2379	9.23617	9.81764	10.9752	5.92462	6.60391	7.80224	18.9243	21.1086	20.2895	17.8702	15.9219	16.892	33.5713	26.2756	28.5544	10.6194	16.4233	10.5358	8.236	6.946	5.21134	4.68229
NM_000477	213	ALB	albumin	3.49953	0.520271	0.695064	0.06228	0.063235	0.094249	135.221	130.327	216.161	10.9077	3.54397	6.63123	18.4737	8.04627	5.80373	6.29027	19.0822	45.7687	10.3536	20.0463	4.08141	5.3548	3.60205	7.99805	0.902639	0.12674	0.718872	0.909739	66.8779	0.599489	2.5061	2.06612	5.27359	9.65133	10.9364	8.51627	2.585	0.063021	10.7332	2.56041	4.31406	7.55098	2.58466	1.08126	2.07412	1.15919
NM_016519	258	AMBN	ameloblastin (enamel matrix protein)	0	0	0.23981	0.447034	0.382161	0.186874	0.037499	0.097275	0	0.031445	0.033737	0.095496	0	0	0.030595	0.035634	0	0.03497	1.00029	2.37003	2.91213	0.107711	0.228796	0.568623	0	0	0	0	0.035778	0	3.55018	4.95161	3.45892	8.05059	9.54934	8.96178	8.84395	6.28221	7.3098	1.31413	0.444394	0.922261	1.29442	0.349926	0.686728	0
NM_001633	259	AMBP	alpha-1-microglobulin/bikunin precursor	1.029	0.134615	0.248379	0	0	0	12.6473	8.90883	15.4281	1.36481	1.12208	1.15097	1.77144	1.01287	1.50711	3.09335	6.07574	6.1245	1.60511	4.31129	1.09142	1.35135	0.441022	0.876976	0.158423	0.083174	0	0.265832	9.14947	0.098193	1.51232	1.22296	1.98997	2.25975	3.16686	1.59735	0.120087	0.051609	0.700958	1.43725	1.73187	3.58844	0.401042	0.04215	0.522427	0.256709
NM_000481	275	AMT	aminomethyltransferase	1.13749	5.15198	4.65086	0.177515	0.711006	0.489051	1.98225	4.59595	3.1536	2.6691	3.00016	0.006023	5.54672	4.45525	3.81348	10.618	8.86262	2.61394	4.0014	5.01175	4.62408	5.83628	3.42307	2.27275	4.67575	3.91386	5.78616	3.50102	3.81447	3.85503	2.08955	3.67393	4.1925	1.86097	2.66778	0.609771	1.03371	2.21327	0.557978	5.68312	5.29538	3.42614	4.67432	5.20338	6.05156	3.35047
NM_001002246	51529	ANAPC11	anaphase promoting complex subunit 11	7.67822	11.2651	9.33182	10.1589	6.50163	6.8952	10.4657	5.71641	7.69005	7.88427	12.4044	8.33822	9.75618	10.0626	14.8918	12.1835	11.0876	3.04428	11.7286	7.04279	8.92355	14.5467	16.3098	8.28878	9.32259	7.55028	11.8369	12.8587	16.0334	13.8074	10.4184	12.1053	10.6251	15.6978	14.1532	10.3176	9.13612	9.25454	16.6362	10.8211	10.215	11.0739	5.39365	12.1158	11.6362	9.51069
NM_001278488	25906	ANAPC15	anaphase promoting complex subunit 15	1.19712	7.44559	6.15406	0.031905	4e-06	0.000219	1.93247	0.593402	0.489799	3.67201	5.90734	5.25525	3.9358	4.4087	2.87896	0.337101	0.120602	0.014244	4.26627	4.47898	0.515143	0.920108	0.004591	0.001241	3.37086	0.99825	0.001596	2.33143	3.41737	2.62829	10.0071	10.2693	5.23411	0.02773	3.79959	5.11489	0.437033	8.2793	4e-06	1.69919	0.000563	3.03125	0	0.27576	3.94366	0.298044
NM_015199	23243	ANKRD28	ankyrin repeat domain 28	3.28145	4.50138	3.07665	2.83994	3.63343	3.69566	1.82321	0.944868	2.17172	2.08118	2.34797	2.86502	4.06215	1.62012	1.03686	0.499368	1.31746	0.011847	2.62714	1.78773	0.168543	0.000774	1.32559	2.6375	3.21464	0.002905	2.11126	1.7069	1.4924	0.963908	3.9189	3.42352	4.86509	4.65862	2.96385	1.96334	3.65136	2.23971	2.442	2.45127	2.83376	1.31299	4.03931	2.89058	1.43764	4.36361
NM_001162435	100287718	ANKRD66	ankyrin repeat domain 66	1.8891	1.27299	4.45413	0	0.049105	0.054826	0.154144	0.550212	0.515837	0	0.069177	0	5.39313	5.04012	4.66326	12.7293	8.69445	8.04851	2.16909	1.78413	0.986644	4.13314	4.84475	1.0879	8.76072	6.91065	6.44726	5.49696	6.51561	4.80303	0.773646	0.710835	1.12915	0.493234	0.291879	0.567383	0	0	0.076435	0.920747	1.89699	1.30537	5.68547	6.86945	6.36691	3.05891
NM_030920	81611	ANP32E	acidic (leucine-rich) nuclear phosphoprotein 32 family, member E	13.6139	22.6713	19.0942	6.29383	7.04862	7.04152	8.83435	8.9407	8.50092	6.72951	0.862008	6.38529	9.42636	9.87695	10.7695	0.398317	0.01628	3.6028	8.57203	11.0623	5.49533	9.18015	6.53022	9.75478	7.25084	3.97954	5.89027	4.83724	4.49274	4.78511	15.0226	17.6043	13.5735	11.1426	10.9062	5.49165	13.7681	7.96936	7.74456	4.45981	11.9273	9.36833	11.5303	12.2422	9.51785	10.3823
NM_005139	306	ANXA3	annexin A3	11.7118	3.01715	8.97036	0.684119	0.66406	0.843203	11.183	12.5403	15.6435	2.8601	1.57645	3.25658	12.7946	12.1332	9.47706	1.1254	1.83298	3.49084	8.67937	6.028	5.80249	11.8874	6.11511	8.47317	3.36671	1.30685	2.57058	3.11206	2.79999	2.18686	2.79822	2.52296	3.12787	14.3184	13.0705	6.66594	1.36251	0.721201	1.17736	4.37246	8.63936	9.19943	6.73291	9.31494	7.34707	32.5937
NM_005498	10053	AP1M2	adaptor-related protein complex 1, mu 2 subunit	2.0909	0.404984	1.03196	0.136248	0.02781	0	1.91035	0.848019	0.943364	0.982864	0.439761	0.636473	1.39582	1.89084	3.22478	0.340563	0.618867	1.05272	1.32685	0.812632	1.50762	3.02887	1.66635	1.7146	4.8e-05	0.102761	0.128517	0.596063	0.297804	0.482305	1.69258	0.319723	3.60137	1.71558	2.28427	0.838267	0.488716	0.170052	0.874639	0.630752	1.46425	1.80391	0.713322	1.75487	1.04569	3.42188
NM_005503	321	APBA2	amyloid beta (A4) precursor protein-binding, family A, member 2	2.93105	11.1287	2.76913	30.6171	35.0014	36.3047	8.39348	4.51738	5.44224	18.5248	19.6461	16.3149	10.284	9.99368	15.0107	12.3711	14.0295	7.70548	8.54921	10.7221	9.69667	9.52048	13.2752	8.36041	10.7228	15.3772	15.0149	13.5785	16.635	13.7893	20.7024	9.45837	9.84482	16.5283	14.371	16.9824	17.919	17.7961	11.527	18.1182	19.6453	21.3624	18.6067	13.6597	10.8201	0.928925
NM_004307	323	APBB2	amyloid beta (A4) precursor protein-binding, family B, member 2	3.22628	3.70122	1.80208	4.58862	5.11392	4.31057	2.10705	1.81809	2.4011	3.66899	2.27822	3.33949	2.74531	2.46788	3.36519	2.00581	0.008965	3.01334	2.36861	3.23671	2.80634	2.94043	2.14087	2.95477	3.58798	3.09519	2.73618	1.42541	2.4043	2.62825	4.21274	3.59537	2.21636	1.20799	2.07585	1.62678	1.6785	1.71951	1.66671	2.34552	2.12301	2.89101	2.37103	1.44295	2.15173	1.86566
NM_000039	335	APOA1	apolipoprotein A-I	23.7602	35.1187	21.0404	0.177073	0.059796	0.20019	51.5175	56.2289	63.9213	24.9009	21.2883	26.293	23.2336	17.151	57.5203	10.3275	28.632	16.7978	61.9186	32.8169	41.0299	51.0456	65.8019	48.1981	14.481	2.73333	7.19441	16.1978	56.2278	9.73596	60.9479	42.6692	45.5331	38.0114	31.3356	19.8704	7.41484	7.65257	16.3596	43.0502	48.8453	82.8335	23.6626	33.4811	27.093	8.24113
NM_001643	336	APOA2	apolipoprotein A-II	44.2501	32.0029	24.5524	0	0	0	199.965	172.082	201.738	46.5534	43.1835	41.003	39.2969	27.8887	91.7462	24.9257	39.5443	37.3672	89.6013	51.6673	59.1328	132.945	88.2261	110.957	11.31	1.701	3.88317	35.7983	51.1558	9.12009	103.062	82.2995	110.63	149.108	107.824	67.7661	2.46497	2.70794	6.74178	86.2632	70.3607	191.878	45.6788	26.8077	59.2856	12.6965
NM_000482	337	APOA4	apolipoprotein A-IV	2.93871	13.8413	4.23143	0	0.033859	0	7.8133	12.0335	5.46508	2.85115	4.58638	6.76259	7.82503	10.7289	26.3018	2.22136	1.02769	1.13996	12.3435	3.19687	10.3469	12.0619	4.42685	9.60788	0.82741	0	0	0.572742	0.911223	0.528873	48.5116	19.2142	26.1681	9.75925	4.34955	6.25635	3.88031	6.51968	6.44196	17.6156	14.4875	44.7355	6.76373	3.30224	5.32078	0.703872
NM_000040	345	APOC3	apolipoprotein C-III	9.59399	26.4183	17.4091	0	0.118464	0	38.0866	32.5002	37.5977	12.7164	37.4464	23.1706	20.2755	20.9573	64.179	6.15349	21.7733	10.5619	36.1588	18.694	24.0086	76.3625	51.9414	51.1411	3.76576	0	0.544124	7.53352	34.1726	2.49941	101.084	80.4038	78.1946	67.5125	32.1681	38.415	4.4044	7.17859	11.3353	67.5473	61.4792	161.256	26.1503	17.4083	27.0528	4.54437
NM_001270696	94134	ARHGAP12	Rho GTPase activating protein 12	7.81801	3.47091	5.0788	9.54859	5.4554	5.4567	4.99367	4.02262	5.00601	2.32136	3.41237	5.7759	3.73741	2.23161	1.88628	0.665721	8.7e-05	3.56445	3.6642	3.82035	4.36084	3.48826	6.2042	6.12566	5.01674	3.60636	4.58139	1.35297	3.13799	1.37589	3.33455	6.46252	5.03335	1.67078	2.51883	1.0295	5.93341	4.08682	1.87054	4.67529	5.06301	4.45968	3.55051	3.77209	2.62905	1.1208
NM_032900	84986	ARHGAP19	Rho GTPase activating protein 19	2.8196	4.07454	4.3141	0.791088	1.07139	1.79464	2.0106	3.05567	3.00337	2.62244	1.86819	3.3059	3.52638	3.04945	2.25962	0.841544	0.708904	1.82281	1.06566	2.09633	1.62854	2.70982	3.13862	3.63003	1.8474	1.30994	1.15347	0.942359	1.01503	0.011557	4.39014	3.21735	5.10789	0.001106	2.04088	0.785947	1.58189	2.60456	2.04907	2.09368	3.06981	0.183918	2.21055	2.53929	2.32671	2.31142
NM_199002	9138	ARHGEF1	Rho guanine nucleotide exchange factor (GEF) 1	1.28648	3.17919	2.13131	1.67908	1.68571	1.44406	3.47295	2.99059	2.04345	3.44801	2.72568	3.0644	5.09637	3.88014	0.962286	3.46517	3.15554	0.001185	3.82847	5.23065	2.76107	3.13912	3.57535	2.27392	4.05651	1.811	1.33974	2.29412	3.3206	2.01583	2.5564	0.192664	1.04298	2.97906	2.01346	1.88776	2.15805	2.52665	1.93508	3.30209	2.24776	2.39259	3.87834	3.80575	2.83338	5.47309
NM_005738	10124	ARL4A	ADP-ribosylation factor-like 4A	3.38124	5.69294	4.16394	1.91557	1.35827	0.704998	1.56913	1.40885	1.21429	1.76107	2.30901	4.20649	7.30387	5.1052	5.71359	1.61318	2.11982	3.34005	2.9693	3.60505	2.54381	3.5599	3.18679	5.21037	3.86011	3.9332	4.39096	3.09871	2.03775	2.88242	2.58174	4.21605	2.46017	0	0.920352	1.58395	1.17935	0.549689	1.23456	3.47941	2.83747	3.69764	2.84299	3.25178	1.78907	3.94591
NM_025139	80210	ARMC9	armadillo repeat containing 9	6.19417	4.5949	7.6661	3.87723	3.25104	2.86841	7.44222	5.04469	7.64583	3.49171	3.84325	0.343195	8.3377	4.67979	7.6294	6.96938	6.24879	12.4176	4.88451	6.56794	6.96557	9.58345	7.13357	6.25045	11.2472	8.06326	8.57613	6.07345	3.63915	4.56472	6.21717	4.82933	4.94327	0.44146	5.5412	4.44458	5.35613	4.38429	4.60327	5.28894	5.12152	3.65762	5.6734	4.96704	7.29488	8.60058
NM_001024960	10093	ARPC4	actin related protein 2/3 complex, subunit 4, 20kDa	18.2311	16.1669	0.058149	22.6115	23.6839	25.6156	10.2459	0.01609	19.0483	22.4971	30.2541	21.8662	11.7059	8.19577	12.7275	23.0765	23.9651	0.860376	17.8469	9.59995	20.8525	15.4448	24.8255	19.9672	17.5515	0.01106	10.1562	0.927287	0.053111	13.1955	0.043442	20.8399	18.2275	0.096108	35.8271	13.0921	0.683538	2.03915	5.21654	0.79186	8.71753	10.9685	16.0308	11.2682	8.95927	14.4491
NR_122035	85026	ARRDC1-AS1	n/a	5.47374	5.48775	4.91642	6.23358	5.30905	5.52933	5.3074	6.00663	6.6344	5.24759	7.18731	5.82167	5.3298	6.12197	8.38727	10.9248	5.86194	2.13801	7.62389	6.95187	8.07426	5.90111	5.43104	4.7061	7.70441	6.79969	6.81353	5.02069	6.13189	6.4067	9.2712	6.28699	6.2607	3.32634	3.6785	5.51748	6.49144	7.77344	8.8265	7.14166	6.63001	5.44093	5.27757	4.51317	7.24334	2.32309
NM_004674	9070	ASH2L	ash2 (absent, small, or homeotic)-like (Drosophila)	7.66548	9.82469	9.30002	9.21664	8.40166	8.3976	6.48444	4.72056	7.7107	4.11728	6.34883	5.38986	7.91052	5.69194	5.83587	0.002652	2.24322	4.10417	5.15895	5.43945	6.68374	5.85052	1.94741	4.43074	4.90175	4.91943	5.03126	3.96653	3.5867	4.6693	5.78652	7.93369	7.81194	3.41809	6.09392	5.51303	5.28783	5.17539	4.10444	4.62917	6.01803	6.34465	7.18781	5.76171	6.84526	4.95967
NM_032189	23250	ATP11A	ATPase, class VI, type 11A	2.43425	1.16599	3.25842	0.000206	0.000131	1.1119	3.46114	1.99574	2.11103	1.80892	0.854621	0.978637	1.89342	2.70604	4.07529	1.57922	0.720947	3.88236	2.69321	2.42868	2.22835	3.514	2.10966	2.806	1.6104	4.2628	2.42542	1.59006	1.87882	1.62986	0.982464	0.707082	2.05506	1.71447	2.14702	2.07788	1.70655	1.06366	0.665507	1.78723	1.86719	2.56005	3.22112	1.56508	2.12745	2.75588
NM_173694	286410	ATP11C	ATPase, class VI, type 11C	5.76308	2.61313	14.0602	2.67997	2.45867	4.44844	3.37282	4.37283	3.70901	1.61717	1.70781	1.14443	13.0159	9.56918	9.93966	9.21121	8.07153	16.4472	11.2305	11.2506	8.95761	22.5621	20.0757	12.2612	38.724	34.1146	42.8001	11.2084	10.5833	10.4671	10.3392	10.1664	19.8266	6.45353	2.6822	3.00996	3.3095	2.38022	1.58557	9.00933	8.51274	4.51488	43.0648	43.1243	40.4691	7.02123
NM_018035	55101	ATP5SL	ATP5S-like	1.21839	8.59426	4.84386	1.42522	1.87565	0.577727	14.9924	10.7859	10.2783	8.22536	9.82425	7.12304	9.24736	6.30753	11.9716	8.0054	10.0519	1.96012	7.03838	7.26571	7.1668	9.73347	6.27634	6.7927	5.48584	5.94527	5.43511	5.50433	7.51741	8.88491	8.44495	7.25226	6.89089	5.16784	4.03294	4.64886	6.09563	6.65723	10.8077	8.87147	7.78104	8.16016	6.76044	10.8814	7.94782	8.30736
NM_001198569	527	ATP6V0C	ATPase, H+ transporting, lysosomal 16kDa, V0 subunit c	23.5299	23.6454	9.87597	25.0089	28.973	8.35009	20.2504	16.1513	23.2738	22.2843	21.3025	17.8743	13.8989	7.30227	10.9007	40.1474	42.9329	23.1588	14.03	24.6002	19.1527	28.0535	25.2141	19.9479	21.8147	27.8143	18.6952	19.6176	25.494	22.8149	17.256	3.48249	1.10562	20.3174	20.5959	23.0537	14.2382	20.569	20.0469	27.0204	28.0907	26.2831	29.8682	21.971	31.7879	20.964
NM_198437	6790	AURKA	aurora kinase A	5.11253	3.63333	4.23721	1.66364	1.04721	0.005828	1.28306	5.26144	1.3e-05	1.6449	2.38252	3.1329	2.14567	2.73497	1.92477	0.001417	1.46773	2.11003	1.31092	2.19289	2.22355	2.14208	1.71282	2.83705	0.743689	0.568141	0.003862	1.67212	0.610402	1.48259	3.97039	2.33256	4.15522	1.14425	2.89287	2.70516	3.11972	1.94374	3.54332	0.772795	3.40227	3.91894	0.001389	1.20817	1.28955	2.4407
NM_001127230	54998	AURKAIP1	aurora kinase A interacting protein 1	20.2056	36.5104	25.3866	17.5731	21.717	2.43431	23.4833	20.3356	26.6562	18.2296	18.7525	19.868	17.5725	27.4467	23.0391	43.7315	31.1688	18.57	23.0431	29.1583	25.8861	32.2814	26.128	23.3942	35.2525	35.4037	31.6779	32.1601	32.6016	23.6452	24.9215	16.6902	15.4628	32.5724	44.0094	32.2368	17.9707	10.7913	22.1483	42.1017	38.3767	37.0568	34.4963	35.0702	42.7186	29.2604
NM_014984	22994	AZI1	5-azacytidine induced 1	0.000153	4.15451	0.591839	1.91033	1.23642	1.88414	2.31691	1.78211	0.846363	4.18498	3.04698	2.13502	3.45583	3.69134	3.98133	4.07101	3.22696	1.7656	4.03802	4.77985	2.96672	3.03754	1.99113	0.519196	3.50073	1.99822	2.4717	1.85462	1.38495	2.26821	3.51119	1.33171	1.44151	0.927053	1.92035	1.73051	2.81831	2.35202	1.87753	1.52953	1.07437	2.67928	1.30012	2.39122	2.39005	1.95084
NM_001005417	8704	B4GALT2	UDP-Gal:betaGlcNAc beta 1,4- galactosyltransferase, polypeptide 2	17.8339	25.4708	19.1847	42.7109	38.1519	35.0846	16.4175	14.3194	15.5246	26.2142	31.1523	26.6012	0.960325	30.7698	34.0074	35.3589	35.5792	16.0338	23.1834	22.6671	25.3488	32.0384	32.1425	19.2843	20.5622	0.311164	18.7488	31.6344	30.9942	32.4811	35.7364	18.7315	21.9594	32.861	28.1819	33.5589	14.531	28.466	30.574	28.2233	29.4237	0.850981	21.4528	23.5581	25.6708	21.021
NM_201280	63915	BLOC1S5	biogenesis of lysosomal organelles complex-1, subunit 5, muted	5.73589	3.59535	5.8997	3.92404	3.14812	1.28707	3.46596	5.7782	4.77278	1.46306	2.36735	2.50241	5.34389	4.27905	4.39356	1.87605	0.000944	3.30239	4.31388	4.42154	2.94605	4.75529	4.05434	6.01652	3.19015	1.25551	2.98821	2.87288	1.13673	2.95368	4.97449	5.29875	5.1089	3.17063	3.31503	2.19478	2.65665	1.93715	2.11575	3.48808	3.8301	2.25296	4.45213	3.05598	1.79505	0.348313
NM_033503	90427	BMF	Bcl2 modifying factor	3.57714	6.58861	6.75389	0.309841	1.35719	1.37752	4.44844	4.94565	2.10397	2.68503	2.49835	3.47067	1.11667	7.49108	7.50345	6.68481	8.3802	3.11967	9.81545	8.27877	7.59465	10.7446	12.4539	8.78168	5.46609	8.73614	3.24895	3.02996	3.05461	3.13196	0.201483	2.0288	3.93679	3.39137	1.8288	0.755629	1.7503	0.764196	0.410718	3.56655	4.88752	4.89212	10.8082	7.18724	5.2288	3.79373
NM_001717	646	BNC1	basonuclin 1	13.0851	1.63071	5.53943	0.048499	0.029522	0.021965	13.4492	12.4174	18.3398	2.01687	1.13152	2.1984	12.286	7.76952	6.34459	0.973025	1.6156	4.9049	8.18082	6.15279	5.79737	6.39462	3.45059	5.83119	1.44356	0.148468	1.36438	0.526102	0.006691	0.984183	2.46036	1.59101	1.39901	9.4409	11.1042	5.93208	0.239708	0.088534	0.231544	3.5354	5.70458	6.81336	6.54264	7.15551	6.50402	36.6867
NM_004335	684	BST2	bone marrow stromal cell antigen 2	21.8316	6.57954	20.8285	0.607159	0.461546	0.343507	63.2633	60.9632	73.2713	10.9868	9.17303	9.47678	43.3571	40.8854	40.283	10.542	14.4758	13.358	45.8309	46.0876	45.1187	39.5411	26.2698	25.3944	20.2487	8.5126	12.0371	11.7912	8.10096	5.37816	12.3897	6.26923	9.60064	39.1423	40.0503	26.1478	6.53512	5.34742	7.98032	10.5755	17.6828	14.8572	57.6456	51.2629	62.8384	98.0261
NM_138787	119710	C11orf74	chromosome 11 open reading frame 74	5.47885	3.09064	3.43822	2.77501	2.89052	2.40984	5.66886	4.35086	7.84767	0.300107	0.915854	0.000145	4.57864	5.57743	10.7521	2.87213	3.54237	7.9524	7.18129	1.01923	2.99895	10.283	0.006996	5.85407	7.36342	3.33701	4.42046	10.2613	4.65224	2.4813	4.41326	8.45639	7.69884	4.31053	6.66714	4.38675	5.08767	3.15152	6.72047	3.73429	4.14061	3.18574	4.08635	6.92928	2.20242	3.15679
NM_001100388	399949	C11orf88	chromosome 11 open reading frame 88	14.8649	5.42335	29.7935	0.078642	0	0.177506	0.874447	2.84007	2.93105	0.417881	0.782654	0.844663	46.7289	36.2832	30.6719	46.3252	39.6657	57.5749	20.1438	22.0666	18.3638	32.3318	35.61	15.7554	97.0821	65.5244	90.7592	44.681	40.228	19.8844	4.60543	4.17521	8.55002	2.60879	1.32378	2.61246	2.03174	3.75535	3.47682	7.33316	4.95986	5.14065	34.6428	47.2672	38.5978	16.907
NM_021934	60673	C12orf44	chromosome 12 open reading frame 44	8.06194	10.7343	8.36358	16.7904	12.9045	16.938	11.6718	10.2082	13.9299	12.1007	13.2557	10.0832	13.1275	14.2962	20.7154	19.1412	16.7138	5.05089	15.8501	13.0584	16.4091	16.8182	15.0088	11.3993	15.4361	15.016	14.6557	15.1589	19.8302	14.7236	17.0041	14.0411	11.6329	17.3583	15.0524	19.1753	16.7461	19.0829	21.6444	15.3219	16.1218	13.8853	11.0398	14.398	15.9791	13.4066
NM_001198784	145788	C15orf65	chromosome 15 open reading frame 65	2.22186	1.73446	2.90692	1.54547	2.08578	2.07696	2.80517	2.27736	1.46876	1.66211	4.18655	2.07541	3.39109	2.78578	2.87324	5.43024	2.84471	1.63443	2.44839	2.88935	2.99509	2.57483	2.83561	1.64546	4.19146	3.58475	3.89944	6.70814	3.97909	1.26352	2.2192	2.51823	3.41917	1.86739	1.2386	1.61519	2.33238	1.21729	2.31175	3.18633	2.77029	2.96513	3.82169	4.24349	1.34271	1.65405
NM_001142798	124944	C17orf49	chromosome 17 open reading frame 49	7.37202	10.0405	7.17668	7.28674	8.12702	4.58447	5.74206	5.20716	7.27414	6.91509	12.5048	8.21419	8.83498	8.04922	12.9581	12.5962	10.53	3.42085	7.6594	7.48931	8.70923	9.94853	7.84201	10.6036	7.58851	8.27572	6.19762	10.0155	10.1947	10.1305	10.8204	5.29815	11.1161	8.44596	6.03442	6.49187	7.94584	5.91918	11.8833	8.70653	11.2642	7.71599	8.18088	9.65913	10.1296	5.52618
NM_001164257	92340	C17orf72	chromosome 17 open reading frame 72	1.8112	0.003799	2.4934	0.002859	0.002918	0.003319	0.004572	0.002966	0.003733	1.29442	0.488035	0.003931	4.29657	2.80055	5.11893	17.4603	11.2636	5.3925	2.8004	3.15897	2.96178	2.68992	3.86661	0.614951	8.51297	2.91183	4.49443	5.38767	5.27906	4.21025	1.22593	0.00021	1.19545	0.621522	0.568369	0.004257	0.273342	0.714037	1.4e-05	1.76268	0.004161	1.01968	3.66463	5.12122	5.04173	0.000604
NM_017941	55028	C17orf80	chromosome 17 open reading frame 80	2.24724	3.39523	2.52439	2.0025	0.027283	1.3552	1.0619	3.90957	3.93379	1.17115	0.940608	1.5913	2.91602	1.87387	1.53444	0.83186	1.23293	2.52811	2.32549	3.94934	2.00643	1.91086	4.99662	3.30278	1.79097	2.82502	2.14663	1.07028	1.64256	1.55319	3.22367	4.50518	1.78695	5.71774	4.94084	4.11252	1.87189	1.53681	3.37995	4.16812	1.57641	1.76241	2.42169	3.4874	4.12082	5.05594
NM_033520	64073	C19orf33	chromosome 19 open reading frame 33	2.93479	4.91516	2.79215	0	0.440912	0.163395	3.45662	4.19949	3.10074	0.9604	1.22985	0.387512	1.24491	1.57929	3.41962	1.30676	2.09025	0.644114	1.50199	0.892829	0.634134	3.31241	1.84785	2.5297	1.33094	1.23851	1.34534	0.664223	0.215194	0	0.258363	0.237158	1.1981	2.44464	2.95984	3.62075	1.02575	0.433033	2.26042	1.17236	2.31081	2.52285	2.05624	2.46869	3.05886	0.865588
NM_001100418	55049	C19orf60	chromosome 19 open reading frame 60	3.78675	7.20727	5.30498	2.44138	5.89807	8.11316	3.56701	2.33038	2.34346	6.19058	6.53178	2.0295	3.11504	6.82382	7.71865	9.58428	2.86403	2.97523	6.75401	4.82176	6.89032	7.9877	9.42663	5.38163	4.54771	5.9e-05	5.44743	6.68991	12.7274	8.5837	9.41614	9.5491	8.81366	7.2681	2.98744	4.23094	3.95538	5.76188	5.41832	9.94125	8.09204	9.07119	4.69934	7.3524	11.0783	5.4062
NM_001013625	257177	C1orf192	chromosome 1 open reading frame 192	24.2706	10.8059	45.9019	3.77486	3.1848	3.94718	4.77524	8.58198	8.37133	6.31797	9.84824	7.70195	52.9629	48.3828	46.212	91.7254	61.1707	66.9836	33.2047	34.4812	28.8598	45.8421	39.1947	20.3319	90.658	76.9687	77.7282	71.4509	74.1903	61.5485	17.7327	13.5559	20.1927	6.27027	3.69893	4.39851	4.67735	8.30953	6.37232	21.1023	21.4618	13.3377	60.6628	79.3884	67.2221	12.785
NM_020317	57035	C1orf63	chromosome 1 open reading frame 63	31.1142	7.79151	16.279	9.7626	11.5522	9.26998	19.8025	20.1619	21.9533	9.38607	7.8527	12.8447	21.1747	14.7741	13.6624	9.60578	9.8604	17.6263	17.986	15.8413	15.1463	12.0156	8.98122	14.3567	11.4879	9.77622	14.3034	8.97332	7.71586	7.71118	15.8724	13.2302	9.65067	10.4002	11.8753	9.98144	12.5528	9.91835	9.88902	10.4023	11.3911	12.7455	14.9103	12.9529	18.5007	46.3779
NM_182533	199990	C1orf86	chromosome 1 open reading frame 86	9.08282	7.28033	8.31609	6.30755	4.05793	6.03192	5.90553	3.00378	4.41578	2.4127	3.39021	3.05736	4.87817	7.32036	9.77933	6.45162	7.05428	1.57517	7.15201	6.3065	6.57981	5.89181	5.633	2.89516	2.28453	2.52923	1.99367	5.29779	4.52455	4.18917	4.82411	6.84377	7.5248	4.89001	8.20272	6.44911	7.07002	10.6538	9.57443	5.95702	6.74855	6.21254	6.86893	8.75474	11.5118	8.01786
NM_015991	712	C1QA	complement component 1, q subcomponent, A chain	21.4988	4.80885	6.2175	0	0	0	0.66328	0	0.431547	2.2223	2.91113	2.49791	6.83645	6.383	6.98865	0.069961	0	0	4.25428	2.10389	2.83014	18.2786	11.734	13.1549	0	0	0.217643	1.08046	0.910395	0.599185	0.493126	0.528615	0	4.48111	3.07027	2.10215	0.108771	0.139959	0.146213	2.2643	4.2997	6.92846	10.2714	5.37072	6.5502	9.40306
NM_000491	713	C1QB	complement component 1, q subcomponent, B chain	36.6709	5.36045	7.3903	0	0	0	1.0167	0	0.850616	3.86442	4.42208	3.44522	8.74518	7.97097	5.75544	0	0	0	4.51509	1.44838	2.00241	20.2962	11.8928	11.4326	0	0	0.076961	1.14601	0.594225	0.353147	0.785073	0.400739	0	7.25695	5.21264	2.37501	0	0	0.31022	1.73507	3.70728	7.0863	14.9988	5.57599	7.66194	14.5584
NM_172369	714	C1QC	complement component 1, q subcomponent, C chain	33.4571	3.17971	6.09622	0	0	0	0.822814	0	0.974977	3.90384	4.69524	2.50312	6.71061	6.43457	6.33802	0	0	0	5.9185	2.20183	5.39137	18.1021	10.7625	11.0553	0	0	0.403842	1.42023	0.847549	0.30983	1.14684	0.701141	0	5.99922	4.50717	2.31729	0.201573	0.390796	0.134713	2.57554	2.91736	9.29406	13.6697	8.06254	6.86641	12.5768
NM_178456	128602	C20orf85	chromosome 20 open reading frame 85	6.15035	1.52886	8.00616	0.145946	0	0	0.695405	1.20437	0.776736	0	0.207582	0.098004	7.34397	7.30018	8.07206	18.4621	12.8119	7.13115	6.44615	5.19283	5.51549	8.65868	6.32701	1.63175	14.1546	13.0632	12.0559	16.8005	13.3729	10.8593	2.07105	2.2592	3.14841	2.96284	1.22822	1.60158	0.171313	0	0.343875	1.77734	2.1131	1.07812	7.01123	8.32687	8.65505	5.57679
NR_026845	84996	C21orf119	chromosome 21 open reading frame 119	1.72924	2.05931	1.14828	0.458215	0.861765	0.443739	2.49653	2.22893	2.9616	0.609341	0.279656	0.704088	0.237969	0.530882	0.340709	0.394654	0.316687	0	1.95298	2.81149	2.28413	4.5828	5.4731	3.4548	0.403587	1.51517	0.613008	3.95189	3.7434	3.75145	0.812887	0.426728	0.21747	3.21452	2.59888	3.54447	0.461071	0.788577	0.926679	5.58589	4.83615	3.43216	2.12762	1.52835	1.89413	1.47284
NM_182500	130813	C2orf50	chromosome 2 open reading frame 50	1.64719	0.637202	3.18511	0.387972	0	0.32932	0.308633	0.751129	0.516415	1.09858	0.692544	0.261475	2.81698	3.27648	3.65909	5.49289	4.31286	3.30933	2.78401	2.2029	2.04605	2.36444	2.65975	0.855729	5.9969	7.74622	6.68224	3.01537	4.69057	3.06621	1.46297	0.553491	1.21115	0.658378	0.350645	0.781026	0.455568	0.366241	0.382602	1.38266	1.33641	0.980117	3.85777	6.69768	4.44696	1.23951
NM_001168243	401115	C4orf48	chromosome 4 open reading frame 48	9.78681	10.4309	11.6615	16.5875	9.73943	37.9534	6.55606	5.99892	7.70426	8.4706	26.1092	5.98933	12.7819	18.1192	32.0677	21.6054	19.4803	5.62342	17.5309	16.3697	19.8632	15.3309	21.2003	11.2034	17.9348	8.60878	10.2569	23.3072	38.7415	39.8182	17.444	35.7314	31.739	9.07128	13.5188	17.8812	20.7825	25.0816	34.4349	21.6197	22.065	16.3098	10.5046	19.3154	22.0131	8.05502
NM_001099858	79020	C7orf25	chromosome 7 open reading frame 25	3.9614	0.038316	4.17051	4.23533	4.46291	4.34129	0.046313	4.49254	0.038394	2.60582	1.60448	0.039425	3.45892	3.58628	3.52103	1.61542	0.048126	2.59203	2.24337	2.75014	1.89542	3.89248	3.12044	2.97643	2.55442	2.35164	3.3562	1.48363	1.78032	2.36599	0.051559	2.58857	3.56526	2.48043	3.64723	2.55489	0.015855	1.93334	0.046617	3.11521	0.042141	2.6704	3.30654	4.09598	3.07136	2.70911
NM_001243751	78996	C7orf49	chromosome 7 open reading frame 49	3.32276	1.76763	3.62696	2.26258	1.58607	0.81381	5.66411	7.25929	4.02233	1.72846	1.56556	2.90234	4.1131	3.88635	2.93494	6.16455	0.651487	2.70025	5.76417	5.4249	0.837455	6.24578	3.63118	0.000491	3.81779	3.08283	3.36796	2.57421	1.57938	1.48886	4.51732	2.03788	0.003998	1.63444	4.79608	1.80018	1.27782	1.92182	0.944967	3.8461	3.43469	4.18002	5.66988	4.87568	4.56825	4.59722
NM_032350	84310	C7orf50	chromosome 7 open reading frame 50	16.3949	23.7639	21.5522	13.5356	25.1362	21.4619	6.93953	10.9172	13.7605	1.86653	8.15243	10.7679	26.6833	24.6132	24.8199	37.3315	30.1788	20.2578	35.1618	17.1956	21.4473	23.6596	18.6961	16.9618	9.69736	13.4817	10.3547	20.443	11.4083	16.8521	39.2369	22.5435	22.127	12.3994	3.3084	6.13936	7.3068	9.96937	7.08187	10.9232	20.3941	18.9608	21.4485	9.46201	20.0886	17.4873
NM_001013842	541565	C8orf58	chromosome 8 open reading frame 58	2.0359	3.15706	2.67789	0.990182	2.04464	0.799103	2.87773	2.39862	2.75431	2.06541	1.13906	1.4256	1.37429	3.19373	1.20634	3.90665	4.58139	2.21905	2.34765	2.71527	1.16763	2.42999	1.99615	2.41739	1.31111	2.04608	1.3727	2.27967	2.18185	0.727672	1.98123	0.564257	3.3e-05	2.79242	2.06265	2.08298	1.46193	0.540288	0.380093	2.91243	1.88637	2.55215	4.00247	2.78256	3.27915	1.91891
NM_001010940	138255	C9orf135	chromosome 9 open reading frame 135	2.53524	1.982	5.79877	0	0.063788	0.142347	0.600597	1.03987	0.754291	0.083776	0.358896	0.169417	5.87534	5.02235	4.67102	12.3439	5.9946	9.33232	3.10784	4.71471	4.39563	5.36858	3.44463	1.81385	10.2942	9.74531	10.2278	12.2915	9.67341	6.04825	2.34638	1.12912	3.76746	0.640081	1.06104	0.921736	0.369686	0.28464	0.198219	2.81607	0.547503	2.03275	6.96297	5.80739	8.15692	4.15809
NM_147168	84688	C9orf24	chromosome 9 open reading frame 24	7.88618	6.20847	21.1454	0.971637	1.24289	2.17014	1.95087	2.80501	2.11534	1.57661	2.7542	0.642201	32.2825	34.8951	38.4671	82.1235	70.0035	31.4749	13.8491	14.5465	13.2486	25.7971	26.8085	9.58089	47.2993	44.533	38.181	55.2617	71.0317	57.1784	3.29223	4.31	9.18916	3.27172	1.64132	2.73924	3.7e-05	2.55819	3.15201	7.98062	9.49676	5.98587	30.0952	43.6856	36.4229	12.4583
NM_001256526	90120	C9orf69	chromosome 9 open reading frame 69	5.20715	5.82738	6.2425	5.92506	4.98788	2.76307	2.96695	7.03555	2.7283	0.443963	6.45476	5.05071	6.18293	6.45018	8.55784	10.6366	5.65386	6.52717	2.38364	7.9841	5.826	8.52226	9.67209	4.77027	6.67254	6.95696	6.02174	9.22948	3.93994	4.62483	5.20758	0.548426	0.841755	4.97581	9.01332	6.11309	4.7229	6.53026	3.88862	8.08428	8.37588	7.10196	6.18899	8.24589	2.63615	7.0906
NM_032310	84270	C9orf89	chromosome 9 open reading frame 89	5.64789	7.72719	4.85518	5.94741	4.72578	4.81252	7.60176	6.74038	6.98391	5.89798	7.0662	4.94419	6.1436	7.56505	8.95184	8.7077	8.28389	2.50651	8.90087	9.08879	8.90367	8.34553	6.38385	6.34921	7.46837	6.04003	8.01932	9.4939	13.1856	8.78253	6.72435	7.69856	6.59259	5.13888	8.45888	7.33976	6.09268	6.76941	8.4489	10.0005	13.3525	9.10156	8.76688	7.67788	7.5591	3.32679
NM_001218	771	CA12	carbonic anhydrase XII	2.81229	0.884158	1.74868	0.777128	0.451974	0.46999	2.55162	2.69936	2.74765	0.000113	0.189917	6.8e-05	6.78236	4.04945	4.28696	9.2976	6.48453	17.4524	3.91721	4.51963	3.55274	5.78783	4.51885	1.67644	10.1995	9.58548	9.92082	1.85683	2.96767	3.14277	0.742336	0	2.08649	1.42952	1.8969	0.96149	0.754931	1.24194	7e-05	2.13883	1.2992	0.952653	4.04352	4.14804	5.39692	6.26356
NM_001206916	784	CACNB3	calcium channel, voltage-dependent, beta 3 subunit	6.36017	10.3466	2.59238	11.1847	10.2738	11.1715	5.23431	3.41237	3.00446	8.51806	2.69052	2.64115	5.91237	1.92874	13.3617	13.2366	9.3997	3.99568	4.59705	7.26728	8.29742	5.94013	8.3127	8.11612	0.000897	5.43712	7.30937	6.02119	7.93958	1.6692	1.90642	4.22711	1.65393	1.80111	6.96643	7.46824	8.92148	5.82541	8.03443	9.8996	7.02817	1.82569	9.14672	4.62937	7.70088	5.64391
NM_033140	800	CALD1	caldesmon 1	5.88798	6.09073	12.0505	3.48467	3.20027	3.73748	14.4838	11.5046	13.2678	3.57061	4.62768	5.41659	11.958	8.64093	7.04652	3.49434	2.27	6.03805	7.88447	7.29664	5.68416	9.03607	5.67379	10.884	6.00004	3.26081	5.12827	3.23976	2.96291	3.81023	6.80399	9.23071	4.80384	7.10992	8.11605	0.88367	6.01273	4.98732	2.79973	5.97796	6.06289	7.00533	7.36131	9.78106	10.7919	22.2343
NM_203459	23271	CAMSAP2	calmodulin regulated spectrin-associated protein family, member 2	7.77003	6.54381	6.56915	0.388617	5.96124	2.49651	3.7653	6.82311	4.44844	5.58877	1.6236	5.39407	8.43393	5.77473	4.70919	1.36351	2.5577	3.97422	2.50238	3.88177	3.54078	5.07572	4.92441	3.27442	1.33887	4.13627	4.38865	2.13774	1.98376	5.02122	7.27124	7.0686	3.32281	5.71251	3.11223	0.062518	3.80289	3.53083	2.43744	3.15712	4.92016	1.68985	4.41522	5.8905	5.84854	8.33487
NM_006367	10487	CAP1	CAP, adenylate cyclase-associated protein 1 (yeast)	34.5475	25.5461	20.4511	24.2008	22.8879	22.3238	19.4972	20.6658	18.313	15.6452	9.95126	15.0637	20.3339	13.4112	21.4016	5.42279	4.57281	18.4273	19.5844	18.1187	11.6564	22.429	13.0922	20.1876	10.0632	11.4285	17.9247	7.32539	6.53737	7.2437	19.1572	20.9184	20.9047	11.9565	24.3701	24.006	18.7236	14.9596	14.4692	17.8219	19.6286	19.6784	17.8348	23.1464	20.187	25.7804
NM_004058	828	CAPS	calcyphosine	1.99738	3.5484	10.554	1.3169	1.24526	1.39443	1.55553	2.62783	2.74935	2.79791	1.28316	1.65862	11.9704	11.1501	11.7367	19.6112	12.6104	6.03636	6.48848	7.42328	7.11292	7.35029	9.26024	2.75955	14.0144	13.1682	13.0736	11.497	14.3576	10.9737	3.50626	2.63631	2.24805	1.73087	1.28612	1.53438	2.60137	3.26393	4.12259	4.56226	4.01364	2.81928	6.40386	7.91419	6.96736	4.10511
NM_001042625	133690	CAPSL	calcyphosine-like	5.39497	1.90042	9.95257	0.291632	1e-06	0.181493	0.59682	1.60489	1.56968	7.2e-05	0.994319	0.866436	13.7411	9.70749	9.13633	8.12822	7.97648	18.2835	4.61539	5.19855	4.0547	9.30813	8.89808	3.17886	23.8135	17.7405	27.0393	9.11425	9.31536	9.54349	0.003599	1.66046	3.65687	1.81825	0.77479	0.317546	0.880811	0.808946	0.511431	2.03642	2.40941	1.51571	10.0576	11.4697	9.75864	6.36278
NM_018491	55871	CBWD1	COBW domain containing 1	3.41079	5.68283	7.57046	6.63831	5.6587	4.00411	2.7818	2.45387	0.724009	3.24144	2.98795	2.39335	2.14079	2.56326	1.73999	3.30326	0.000217	2.43241	4.03715	1.69478	2.47878	4.76164	4.37947	2.9603	2.98155	2.45966	1.83401	1.58391	0.672789	1.24347	5.98382	7.04217	7.56586	2.0798	2.48861	1.86391	2.05779	1.75991	3.73929	4.5011	4.19236	4.40603	1.90886	2.64697	4.17919	2.99056
NM_004059	883	CCBL1	cysteine conjugate-beta lyase, cytoplasmic	2.88721	3.86066	3.05712	4.95519	3.22045	2.19897	5.71584	3.24126	5.16913	3.27062	5.17504	3.33289	0.010061	2.98304	4.13687	6.17182	6.56345	2.96992	4.74897	3.51058	6.0522	0.968691	4.68215	3.86402	3.66765	6.70376	4.4307	4.061	3.09751	3.47098	4.98573	4.99308	4.33781	1.67918	4.20807	3.94323	6.525	5.15436	7.47178	6.76373	4.73977	3.18226	2.3898	3.5265	4.18079	0.433143
NM_012337	25790	CCDC19	coiled-coil domain containing 19	2.90196	1.29299	8.72787	0.371213	0.080738	0.210535	0.676018	1.56197	0.776739	0.531373	0.53202	0.537859	7.04658	5.62252	5.72381	4.21511	2.62432	5.31908	3.47293	4.69007	4.05361	5.54227	4.16611	2.69001	12.7106	11.4575	11.9231	3.89528	3.34414	3.40389	2.0239	1.38415	2.92237	0.992657	0.608375	0.23305	0.840911	0.964914	0.504081	2.38303	2.04135	0.967301	8.86934	9.32731	7.04234	3.47857
NM_001174138	885	CCK	cholecystokinin	0.093371	0	0.451181	0.593805	0.075128	0.41893	0	0.076561	0.098756	0.098603	0.10555	0.199335	1.65174	2.88711	1.90641	6.25984	3.7429	2.21855	1.3624	0.670853	0.970948	2.07997	2.14471	1.2232	0.799702	2.07886	1.41124	7.10943	9.65923	8.7579	1.24438	0.8466	1.23151	1.63217	1.07071	1.52042	1.24644	1.3392	1.3988	2.0263	1.63228	1.63341	4.2204	5.57689	7.6277	1.13051
NR_030770	83605	CCM2	cerebral cavernous malformation 2	1.29165	2.06904	2.18651	3.45797	6.45109	3.85268	7.45434	4.40272	4.7753	5.32193	4.37721	8.18373	6.7488	4.18893	8.04345	9.71492	6.99959	1.52134	8.56305	4.03381	6.24966	4.85191	2.34977	6.29443	6.9041	5.14294	4.01503	7.15382	4.73974	10.131	3.77666	6.01058	2.22994	5.82845	6.38747	4.34637	6.60684	6.10974	5.92083	6.21707	3.80969	5.59069	0.150995	3.46188	3.12256	2.07831
NM_021147	10309	CCNO	cyclin O	1.18031	0.748601	3.491	0.264735	0.104954	0.109585	0.354842	0.310881	0.43265	0.284386	2.3e-05	0	2.49828	2.95096	4.04082	7.91238	4.59734	2.47201	7.25752	8.11391	6.85074	5.20466	7.38541	2.51683	8.30414	6.44489	7.28632	4.75529	4.79079	2.38143	1.55357	1.88502	2.79216	2e-06	0.176917	0.422957	0.557324	0.797089	0.984755	3.46432	2.56227	2.11123	6.33254	9.24131	7.3071	0.820899
NM_001199022	9738	CCP110	centriolar coiled coil protein 110kDa	2.78765	4.70563	4.79987	4.7004	5.04726	4.43082	2.26082	3.26533	2.95128	4.69024	4.09346	3.72297	4.55355	2.912	4.53725	1.91895	0.012089	1.79188	3.41999	3.73637	2.71014	4.11539	3.75962	3.47607	2.45291	2.85046	3.36097	1.34097	2.33713	3.36731	3.96813	4.83861	5.40682	3.04776	3.03985	3.30677	5.21101	4.25116	3.64263	2.20375	2.45456	2.90334	2.78739	3.07506	2.74765	2.41143
NM_001284240	54462	CCSER2	coiled-coil serine-rich protein 2	2.73163	3.66623	2.65426	5.00315	5.06897	5.42477	4.25676	4.53383	4.74079	4.05495	4.20982	4.25795	3.52075	3.12281	3.61642	0.001271	2.60728	4.83541	4.44705	4.26692	2.92424	4.20824	4.93638	4.40034	3.95357	3.71898	4.98062	3.37596	2.42629	2.47268	4.85726	5.54379	4.73319	3.30861	4.2786	1.8209	3.83621	3.65755	2.72045	2.51684	4.01683	4.71176	4.37662	3.56377	2.4893	3.14149
NM_153826	4179	CD46	CD46 molecule, complement regulatory protein	16.0477	7.81625	14.5338	3.50668	1.91808	1.84011	14.5928	19.4717	20.4061	6.39489	6.70559	3.28867	11.7714	8.56609	9.49746	11.5484	7.93583	25.6611	15.2073	10.8346	9.92538	15.3926	11.4358	10.9083	12.1845	9.44518	9.4066	0.82589	2.29817	2.82442	9.43702	9.10495	7.29989	8.95049	7.96943	1.67857	4.7768	2.64551	6.4311	1.99255	5.51499	2.60653	9.72018	16.4851	12.1152	15.3369
NM_001251	968	CD68	CD68 molecule	21.2659	5.22689	6.6055	0.903079	1.37499	0.580373	7.49429	6.07513	8.15614	3.24423	3.07744	2.97267	7.91508	8.49187	8.19369	2.14732	2.38396	1.86113	10.0636	6.64608	8.12938	14.0584	9.98069	8.85054	2.73917	1.52879	1.36695	2.95568	2.05888	1.84361	2.00491	2.01567	1.94202	6.51225	6.11674	5.61246	1.79427	2.17002	2.71342	4.97765	4.62692	7.97829	11.7263	7.79576	10.1458	13.1588
NM_001287520	994	CDC25B	cell division cycle 25B	14.5634	4.41482	1.74331	2.05946	2.00604	1.3006	11.2327	9.52434	12.2534	1.14688	5.96148	5.26238	5.91408	6.42965	5.38611	1.87591	4.30076	0.93496	11.3653	4.77466	6.69726	3.99464	6.64811	2.72767	0.211519	0.396083	5.76647	4.8265	6.24505	4.68539	8.98742	4.47315	1.8155	4.45376	5.75016	2.43	8.68569	2.95657	3.46211	8.97055	9.11819	8.32701	5.99782	3.4304	4.66053	5.35278
NR_121598	101929351	CDC37L1-AS1	n/a	3.96702	7.37754	3.19197	1.04677	2.07357	2.27177	0.818522	3.22704	2.69167	2.66946	7.04612	6.60807	6.53057	6.30804	4.11672	7.58845	7.86559	1.50463	2.95414	3.64915	2.99001	3.13902	1.5842	2.35129	1.5186	5.65358	3.0511	12.6463	7.81884	2.52741	4.09028	3.34878	1.64809	1.69727	3.664	1.58221	0	2.21922	2.8623	4.07674	1.48817	1.35091	2.47585	5.39913	4.2021	4.49709
NM_001793	1001	CDH3	cadherin 3, type 1, P-cadherin (placental)	13.8759	3.36118	8.73159	1.85062	1.80535	2.0847	17.8643	15.713	17.674	7.30496	4.04938	3.9625	18.9266	22.2611	19.4664	10.3986	13.9054	12.1085	15.4474	11.5386	11.397	22.1934	11.2584	11.0543	6.70594	4.7271	5.28981	7.49016	7.47546	6.29655	6.10966	2.65978	4.98004	12.8733	15.3498	9.38421	3.42197	3.13387	2.77344	10.5328	14.2667	16.0302	12.1214	17.0653	14.4797	46.9086
NM_001145306	1021	CDK6	cyclin-dependent kinase 6	2.987	8.02747	5.46647	4.42387	3.87453	3.65086	8.82379	5.88302	3.90162	5.87567	3.48795	4.02082	6.97287	6.56427	3.81066	2.82539	3.14985	6.6254	6.78187	4.7286	4.69228	8.78039	3.93945	3.39506	2.62514	0.000427	3.79169	3.13734	4.59633	4.09293	5.16666	4.2061	2.33833	2.74404	2.54214	3.74475	2.21586	2.42381	2.49296	3.30445	1.23019	4.38966	4.7797	4.53401	6.04358	9.83196
NM_003159	6792	CDKL5	cyclin-dependent kinase-like 5	2.56286	2.74338	2.69426	3.04051	4.6374	4.10704	1.45901	2.35268	1.49794	3.28792	2.12895	3.37125	2.7623	2.24119	2.63223	1.04354	0.000636	1.51611	2.0985	2.11334	1.84858	2.86962	3.32978	3.09631	0.153108	1.64467	1.74766	1.57703	1.50568	0.832889	0.166096	3.82192	0.154727	2.81897	3.08854	2.77482	3.31901	4.44513	3.03649	2.31089	1.96859	2.06669	2.30996	2.49846	2.01459	2.55827
NM_005195	1052	CEBPD	CCAAT/enhancer binding protein (C/EBP), delta	8.81011	2.51264	1.85691	0.358128	0.242144	0.811355	10.009	8.59033	13.2963	2.49469	2.1055	2.20193	10.1051	12.9021	14.1814	6.61685	5.86304	2.71717	11.3791	7.91567	9.38118	9.76626	6.75077	4.98643	4.31169	2.23282	1.80982	4.64895	4.94179	3.2641	2.18923	1.94676	1.92356	13.7904	12.8137	12.1787	1.44866	1.26407	2.57835	6.5446	7.50725	8.10465	7.12014	9.92917	10.9661	16.4116
NM_017829	27440	CECR5	cat eye syndrome chromosome region, candidate 5	4.67172	22.2542	8.06649	9.73408	8.46978	11.273	9.76713	10.9385	8.35225	9.83475	13.3855	9.49776	5.71995	6.86622	11.8545	11.0228	10.2284	5.00082	8.64414	10.0195	5.83796	7.47152	14.4592	9.87899	7.73577	5.92062	10.4479	11.8916	14.8783	10.0035	8.02437	11.6541	8.02753	9.74717	13.7129	16.5138	8.94159	5.0088	9.78021	15.6351	12.2365	11.9008	10.8426	8.37647	9.50743	8.74137
NM_020180	56853	CELF4	CUGBP, Elav-like family member 4	0.748241	1.30831	1.43771	5.97023	6.60237	7.36318	1.27302	1.16594	0.556658	3.59721	3.36234	3.25467	2.26387	0.703578	1.20639	0.554453	0.000719	2.11044	1.71529	1.40231	1.18035	0.850936	2.98283	1.77756	0.002086	4.16209	2.38008	1.1237	1.01527	1.71684	2.54408	2.21359	1.70565	1.48525	1.55208	2.29753	4.27326	4.37939	1.66204	2.40431	3.14987	3.61978	1.09049	1.44367	0.437938	0.343005
NM_016564	51286	CEND1	cell cycle exit and neuronal differentiation 1	3.48751	4.80578	3.06099	13.8907	14.156	16.9765	4.6492	4.28214	4.4684	6.89864	6.68884	4.93101	4.09005	5.47886	7.02083	7.37606	5.63214	1.82089	5.69933	5.34066	4.58834	4.09546	6.70885	3.33493	5.29447	5.30683	4.08147	3.7829	5.4949	5.89026	8.75406	6.71189	6.13797	4.51744	4.58006	5.77063	6.75238	7.386	6.60788	6.87218	6.65398	6.14886	4.12418	4.01001	3.94035	0.615848
NM_022145	64105	CENPK	centromere protein K	2.75975	6.02645	4.69988	1.10739	1.28843	0.733514	1.76678	1.98066	0.891819	1.27261	2.34963	0.682503	1.47349	1.92959	2.06392	0.699551	7.4e-05	1.22195	1.60231	1.75464	1.78343	2.80321	3.13549	2.78565	0.769755	0.564184	0.828863	0.000891	1.42539	1.25479	2.38281	3.28649	2.5156	2.27477	1.77437	1.73831	2.82018	1.62348	1.52607	1.5857	1.77053	1.86413	2.23689	2.22049	1.68494	3.19935
NM_024629	79682	CENPU	centromere protein U	5.57216	6.93475	6.58869	1.0633	0.696274	1.74844	2.39077	3.15049	2.01196	1.88298	1.53776	1.82613	4.55594	5.0079	4.84506	0.917376	1.17776	1.4e-05	2.88477	3.05045	3.05578	4.62003	2.25565	2.23147	0.858561	0.700223	0.713107	0.412899	0.84329	1.28274	2.50815	2.93982	3.5665	6.42704	6.04911	3.88119	2.0839	2.42184	2.54118	3.55035	4.09939	3.84538	3.80198	4.47909	2.20256	4.0624
NM_138638	1073	CFL2	cofilin 2 (muscle)	4.5843	3.16169	6.88185	3.88407	1.81902	3.72661	4.72808	5.32722	10.5011	1.34967	1.15378	2.06555	4.92409	3.94062	5.35469	4.24557	1.34339	6.27084	6.60085	3.5971	5.44094	7.26129	4.53975	2.513	5.25377	2.75861	4.03807	1.20968	2.7808	2.87289	3.51959	7.0251	3.75906	0.285888	0.935169	0	5.42012	4.6925	4.23547	0.534531	3.96508	3.24382	4.62576	3.1838	5.18128	9.52653
NM_001127184	8837	CFLAR	CASP8 and FADD-like apoptosis regulator	2.66528	2.4524	3.90943	2.80255	2.64609	3.03348	1.86349	2.39424	2.31529	2.73109	1.48826	2.91671	0	0.243147	0.294787	1.73255	1.03289	1.79262	0.83424	0.811717	1.61163	1.70835	1.24021	2.02452	1.56273	1.27471	1.71873	0.887055	1.31084	1.65719	1.49442	1.31247	1.84378	3.0548	2.65842	2.81228	2.22345	1.51388	2.30745	1.4133	1.28945	2.27756	0.686604	1.08311	0.117185	1.1248
NM_000735	1081	CGA	glycoprotein hormones, alpha polypeptide	0	0.096475	0.323543	0	0	0	0	0	0	0	0	0	0	0.09961	0.287811	0	0	0.109147	0	0	0.214237	0.112084	0.118303	1.41277	0.2269	0	0	0.113822	0	0	0.522996	0	0	0.374109	0.974836	0.86285	0	0	0	0	0.320191	0.098952	0.191363	0.452188	0	1.21502
NR_125756	400916	CHCHD10	n/a	19.0182	23.099	31.6882	10.511	9.85796	11.4003	34.705	30.0329	32.7425	9.11943	13.4408	9.54274	31.8908	31.9068	39.8777	115.214	68.5487	50.0186	30.357	35.9635	32.3994	34.3164	35.9447	19.3876	48.8297	46.7004	39.762	32.866	41.7949	30.5165	12.3284	2.62285	15.9634	16.6797	15.8807	18.8734	13.318	10.1802	20.2206	11.3672	12.5531	13.0499	35.1021	40.0849	36.6033	18.3542
NM_016139	51142	CHCHD2	coiled-coil-helix-coiled-coil-helix domain containing 2	0.167222	0.174224	0.09717	134.726	107.015	117.81	72.9792	55.6862	68.5439	0	0	0.089351	1.93318	2.24606	4.32441	0	0	0	95.3338	94.8556	98.2746	15.0716	10.8987	6.16433	126.195	105.015	112.017	275.339	306.301	250.597	164.603	148.398	154.107	144.72	148.16	135.103	14.8249	21.2148	21.4283	186.693	195.732	160.733	51.8386	72.1872	52.423	107.76
NM_001297553	1108	CHD4	chromodomain-helicase-DNA-binding protein 4 isoform 2	33.3134	32.1254	34.7187	26.9341	27.1081	24.877	36.9061	35.5244	31.5604	22.5226	13.4701	18.4247	27.792	22.4007	19.5438	7.42046	6.54321	24.0212	21.0986	29.2673	21.9076	31.2219	21.6167	31.4271	21.8853	23.4164	21.5559	9.60153	7.37324	14.2355	26.6649	24.4022	28.7857	16.5953	27.7027	23.439	24.0553	23.8799	11.608	24.0123	22.6476	27.168	29.1023	26.917	23.8719	32.0214
NM_001275	1113	CHGA	chromogranin A (parathyroid secretory protein 1)	2.64551	14.0524	6.09867	17.7442	18.5513	17.9932	3.41141	3.47312	2.81948	8.06473	8.74587	8.5945	5.89217	5.34601	9.7262	5.64698	6.79995	2.77084	12.1119	10.9376	10.0875	11.4846	9.85717	9.12269	7.62369	6.91203	7.27805	8.2438	10.9556	7.47374	9.35589	4.91864	5.61377	8.39349	8.64632	10.6763	8.2725	7.29796	8.42787	10.4899	10.0837	13.564	8.14034	7.73081	5.87615	3.81933
NM_001253387	10752	CHL1	cell adhesion molecule L1-like	0	0	0	28.8575	29.584	29.4089	0.619028	0.19022	0.408011	6e-06	0	0.035461	0	0	0	2.66356	1.16543	1.83574	2.32801	0.000235	1.64676	0	0.004544	7e-06	8.02442	7.07161	11.5258	4.96465	4.38734	6.05716	2.98712	6.40766	3.65479	0	0	0	0	0	0	3.64038	4.42753	2.91076	6e-06	4e-06	6e-06	0
NM_001206602	1123	CHN1	chimerin 1	31.0464	7.18175	13.1628	1.51586	2.31695	1.49072	5.87828	9.30482	7.34171	5.61767	1.6448	8.54677	34.4493	31.0552	24.2254	2.7372	2.87219	5.0274	15.6432	10.4452	9.43709	26.0889	12.9119	19.9425	4.81421	1.99952	4.14518	3.61071	1.95911	4.22133	8.35801	12.6677	7.17563	14.3233	12.009	5.55122	2.8287	1.34041	2.31258	8.53594	16.8834	17.2514	16.2566	16.773	15.1052	49.837
NM_001195731	79586	CHPF	chondroitin polymerizing factor	21.4695	16.7003	14.1087	18.8154	19.563	12.7767	19.8311	17.5573	19.6986	16.125	14.2774	18.976	29.7732	22.9629	15.376	32.2333	27.9232	14.4481	23.4054	20.4825	17.4743	28.4872	19.9387	15.3648	26.8631	19.45	21.6323	24.0382	22.2107	12.7258	8.19443	2.30483	0.992672	15.8488	17.023	16.2795	10.5315	10.4911	9.34151	19.7908	18.015	24.606	26.9405	28.451	27.5608	34.8017
NM_001243794	55501	CHST12	carbohydrate (chondroitin 4) sulfotransferase 12	2.46562	0.900752	1.94329	1.44429	1.51105	2.10281	3.37321	1.91746	3.23339	1.80375	3.09921	1.10681	3.0668	2.14175	4.83775	3.77179	3.7615	1.94754	2.63991	2.28004	3.51496	2.57358	2.69044	3.19445	0.465231	2.475	2.5874	2.14032	1.79231	2.78282	1.73397	2.3556	0.004225	2.23069	1.71951	2.57777	2.37139	2.46767	1.94228	3.48978	2.89045	3.91413	2.1807	3.47467	3.72478	3.32769
NM_001127896	64377	CHST8	carbohydrate (N-acetylgalactosamine 4-0) sulfotransferase 8	3.07349	2.48435	2.56677	2.52108	3.59949	3.4509	1.40271	1.46165	1.18934	1.44457	2.22729	2.35776	1.35302	2.08304	1.7959	5.52445	5.18859	1.25405	3.37813	2.78796	3.1873	2.40992	4.819	3.37668	2.46216	2.6724	2.3046	1.82961	4.17173	2.28928	4.74345	5.40355	5.38371	3.52832	3.43201	5.0355	4.59697	3.85808	5.65508	6.20775	7.43362	7.41175	3.33303	1.60754	2.3716	0.495905
NM_018204	26586	CKAP2	cytoskeleton associated protein 2	10.7092	13.2442	13.3231	2.89524	2.86153	3.26999	5.04517	6.56646	5.18196	3.07047	3.60757	4.25354	4.63079	5.91062	5.39569	1.59546	0.054331	2.26564	3.86036	3.26248	2.94858	6.92758	5.94749	8.39739	3.5329	3.92887	3.2978	2.85656	5.75999	6.23352	7.95795	9.7727	8.44943	7.81059	4.68175	2.5251	5.50496	4.90447	5.35489	7.31845	5.31412	6.57228	3.29934	5.33129	3.51893	5.43335
NM_001824	1158	CKM	creatine kinase, muscle	1.42021	0.190693	3.50021	0.665795	0.293775	0.229792	0.599549	0.38888	0.308349	5.99281	1.94913	0.31306	3.3576	0.156398	0	1.18299	0.892057	1.46224	5.52055	1.06667	0.505723	0.176635	1.35917	0.139786	0.49379	0.918594	0.272957	0.406921	0.835244	0.459106	1.13043	1.32215	0.338269	0.09849	0.489285	0.339217	1.25803	0.789731	1.10015	0.433462	0.714717	0.860205	0.265171	0.322539	0.488609	0
NM_007056	11129	CLASRP	CLK4-associating serine/arginine rich protein	0.000166	3.06541	1.16173	0.10436	1.78129	3.04568	6.46856	5.09647	3.17417	3.58432	0.961094	2.88687	4.35707	2.88298	3.58429	3.87538	1.43563	1.35747	3.63309	5.3431	7.13503	4.44803	3.47575	1.77548	3.5208	2.8148	2.14287	1.65477	1.12961	2.35866	3.04581	1.71979	2.51915	6.63211	8.95307	4.58784	3.99002	0.865548	2.76225	2.63253	5.24818	3.47954	2.79626	2.84032	4.27569	4.98232
NM_004366	1181	CLCN2	chloride channel, voltage-sensitive 2	0.000633	2.02599	2.05229	1.48921	2.26179	2.79313	2.06055	0.661592	1.89653	2.55758	2.38137	1.79433	2.8042	1.86928	2.9393	5.11858	4.1882	2.56148	2.66112	2.63391	2.98084	1.90062	2.21167	1.01559	2.33896	3.32097	2.09189	2.12493	3.4577	2.9593	1.71029	1.48962	1.98572	2.55307	2.13732	2.7868	1.1359	0.474034	1.47141	2.92045	3.54076	2.61141	3.1397	2.60936	1.92608	1.73095
NM_021195	9074	CLDN6	claudin 6	11.2339	3.54037	7.8421	0.430365	0.545723	0.203209	6.7961	6.15036	5.25216	5.55188	2.77132	2.66376	13.1801	23.1095	19.824	6.45447	10.4007	8.14782	10.3806	5.41727	6.73371	33.358	12.0038	16.3171	4.55519	1.09391	2.75813	6.93416	3.80586	4.13174	6.30161	1.69626	15.6711	13.5324	21.3322	11.5552	2.40084	1.14008	1.58814	9.21833	11.4535	15.7781	4.26554	15.2077	9.39694	41.5353
NM_001040181	56650	CLDND1	claudin domain containing 1	16.8391	10.5189	16.2226	12.2118	10.6418	13.1228	15.0307	17.2568	16.7315	7.50497	10.7794	18.3487	13.8324	12.7426	15.1732	2.99681	0.057507	9.66428	10.7194	11.9166	9.48833	15.2573	11.8153	14.416	13.2566	9.89253	12.4001	10.2558	7.62356	7.39	15.761	17.3157	18.7661	12.8442	9.01549	8.38252	12.829	11.6211	13.4957	10.8418	10.4191	13.629	11.5586	9.78307	10.0005	13.9729
NM_004071	1195	CLK1	CDC-like kinase 1	11.9958	7.01164	7.43344	7.22982	6.15263	6.88481	13.6538	11.7873	14.6797	3.36087	1.39887	9.27365	5.04312	5.41054	4.47327	0.658569	1.62441	1.207	6.83946	6.86701	5.85062	7.73359	8.77651	10.2549	5.41876	8.38068	7.79956	4.35258	3.0341	1.77122	9.62344	12.4202	8.40005	5.44944	5.27177	4.46565	16.9696	17.1002	19.2908	3.81882	4.93061	5.79443	6.89904	5.14949	6.06373	4.41993
NM_001855	1306	COL15A1	collagen, type XV, alpha 1	88.2585	27.4834	22.9494	1.15943	1.93003	0.985874	23.8124	30.34	32.0634	31.1364	16.8502	23.3323	99.8688	130.881	89.871	22.1567	28.3263	29.0975	80.6256	70.226	54.2593	142.17	70.8397	60.1393	33.8188	5.40505	17.7088	29.0393	14.297	16.1464	14.2356	5.04598	4.44636	36.5989	38.5711	27.4342	5.87399	2.46427	4.71869	25.8129	42.1948	53.8562	66.4141	103.2	83.6422	255.504
NM_130386	81035	COLEC12	collectin sub-family member 12	22.3442	7.86093	26.3912	2.56234	1.53789	2.56283	20.0839	27.5179	25.7687	5.97996	4.22314	6.31149	29.0779	20.5434	21.7113	17.1501	14.1289	36.9412	17.3024	14.5255	12.7452	27.4976	19.9489	15.7176	29.8955	20.0936	30.4214	12.4599	13.0692	14.1412	10.1583	10.2155	11.4209	10.3218	11.0712	6.57063	2.41162	2.85378	2.08041	13.1259	14.2447	16.9431	23.8001	27.8207	23.1909	36.6786
NM_001008220	10814	CPLX2	complexin 2	0.941764	0.176851	1.53617	5.50218	6.96299	6.23065	9.43448	6.19119	5.51981	4.80379	2.70049	4.43834	1.6537	0.730681	0.455395	0.000143	1.25659	0.000926	2.28632	7.55424	5.67769	1.73784	2.15653	1.41576	2.16182	1.19372	1.23147	1.60673	0.697018	0.985902	7.10174	7.63565	7.34525	11.5228	12.5853	11.5482	12.9795	12.6707	7.36132	3.69357	3.60977	3.93079	1.50944	0.677623	0.758475	0.000222
NM_152926	8904	CPNE1	copine I	19.4349	10.2893	6.82128	6.66126	5.89902	2.00428	24.0392	21.5234	19.8104	18.1696	18.0152	13.8264	14.7843	21.0436	23.2751	41.4217	32.7604	17.7005	2.04179	0.010046	2.88654	20.0533	22.2389	17.2379	9.24611	13.2379	6.76254	20.8096	18.3095	26.1156	19.5195	17.057	16.5199	19.2719	17.4382	13.7549	0	0.008649	4.73627	1e-06	5.9e-05	6.31498	20.4399	15.5829	18.2693	18.4801
NM_001122633	1373	CPS1	carbamoyl-phosphate synthase 1, mitochondrial	7.18636	6.62284	8.12647	1.10258	1.1119	1.49103	10.769	12.1018	10.8612	2.15992	1.855	3.69418	5.55946	4.81745	6.21445	1.04059	0.005282	1.661	4.29971	3.64745	3.53356	6.79132	5.75007	6.49353	3.36051	2.17451	2.7231	1.47922	0.003102	2.10109	3.53441	4.93506	4.97542	1.66761	1.78471	1.11376	1.77896	0.895927	2.38233	2.86483	3.51081	3.51589	3.43418	4.2801	3.34013	8.12144
NM_001014447	8532	CPZ	carboxypeptidase Z	10.4753	2.32998	1.62329	0.000787	0.000858	0.000974	17.4205	13.6144	17.4655	3.17728	2.89582	1.80005	17.1093	19.5799	18.0281	3.43632	3.61793	1.45376	13.6831	8.75452	5.81969	13.7865	10.2052	6.80868	2.5953	0.999345	0.001313	2.69804	2.96839	3.24994	3.32118	0.660348	1.37169	4.65345	5.27957	1.96534	0.000158	0.000174	1.65084	4.44296	8.68185	10.0569	5.58377	9.50107	11.8695	31.282
NM_031476	83716	CRISPLD2	cysteine-rich secretory protein LCCL domain containing 2	58.6081	17.4387	23.7574	0.371299	0.466581	0.344174	26.9052	26.728	29.4772	12.2041	6.69824	10.7563	70.2522	68.7202	48.3348	5.0987	8.10679	15.076	30.2149	26.512	20.0147	63.9922	33.6608	37.8122	16.4928	3.40208	8.53799	9.07762	4.44309	5.66811	10.2186	4.95927	3.46707	30.2592	37.571	23.9134	1.96305	0.847019	1.60039	17.7503	25.6636	34.3201	40.4168	48.9414	44.7528	135.952
NM_001127458	54675	CRLS1	cardiolipin synthase 1	8.08496	5.98061	6.36155	4.37871	4.05332	0.766221	7.40337	8.57094	8.37041	3.12104	3.70744	4.21697	6.96748	2.89358	3.87633	1.49576	1.46297	2.86899	7.87387	5.84292	5.96492	3.66954	4.22882	4.17983	3.80488	3.01045	2.19927	2.59165	0.580012	0.279204	1.80549	0.943427	0.000565	6.88455	6.10986	5.05487	2.23863	0.79144	2.44287	3.36374	3.83122	5.75401	7.77288	4.37401	5.27411	17.2499
NR_034106	643911	CRNDE	colorectal neoplasia differentially expressed (non-protein coding)	4.3586	14.0292	5.1529	4.41465	2.08031	2.9966	1.08547	1.00152	0.288528	5.21924	11.1576	8.03851	3.77683	5.39141	4.71342	2.97052	3.14894	1.92535	3.41683	3.36835	2.67103	4.27809	1.12671	4.56921	2.74155	1.15257	0.403432	5.77388	2.9305	3.30825	3.58191	4.7285	2.97622	1.33819	0.000916	1.04876	1.46588	0.786533	1.95939	4.90945	5.0523	3.72534	3.61679	4.03298	3.02627	5.42082
NM_000394	1409	CRYAA	crystallin, alpha A	1.22157	0.754393	1.93183	0.132418	0.313284	0.149932	10.1858	6.56413	9.04847	0.117693	0	0.357205	1.01451	1.01382	1.37797	0.400149	0.357095	0.262	0.304107	0.433554	0.192674	2.21986	0.570065	0.992016	1.02413	0.699796	0.345843	2.06053	2.20365	1.6503	0.469981	0.863683	0.955921	8.3188	42.8891	24.3655	4.92411	0.400311	0.418206	1.43906	1.08863	0.595036	1.55533	1.47085	1.89049	1.39441
NM_001289807	1410	CRYAB	alpha-crystallin B chain	13.2305	10.0098	20.2575	0.002504	1.8087	0.538005	4.67585	0.057664	6.50867	11.2087	13.4144	16.3311	6.39994	6.97226	5.95493	27.5081	23.0119	11.5477	12.8235	8.40991	15.3023	18.4613	6.76224	3.63393	13.448	17.0172	22.7024	14.7209	19.5261	11.2094	4.19225	0.201156	0.00314	10.2949	14.4577	13.7031	25.7426	41.1965	37.4378	0.393135	12.3566	5.89058	1.08132	4.97271	11.8149	2.55197
NM_005208	1411	CRYBA1	crystallin, beta A1	0.173906	0.996165	0.707558	0.138245	0.139969	0	2.30612	0.784439	1.37962	0	0.295129	0	0.25136	0.186877	0.269848	0.312423	0	0.204754	0	0	0.200969	0.315531	0.22213	0	0.319436	0.252578	0.431246	0.320717	0	0.197944	0.613091	0.675852	0	2.45688	14.8806	9.50791	4.7062	0.208042	0.108654	0.4679	0.300322	0.185771	0.269426	0.763904	0.631143	0.207266
NM_001887	1414	CRYBB1	crystallin, beta B1	0.575158	0.300007	0.667843	0.057152	0	0	1.09048	0.176974	0.760616	0.456459	0.244496	0.153872	0.207628	0.540667	0.371787	0	0	0.084725	0.196797	0.070148	0.332476	1.04434	0.552231	0.457689	0.176426	0.139308	0	0.08865	0.086185	0	0	0.186324	0.475211	2.51886	16.7906	9.11851	2.75113	0.086189	0.180068	0	0.414201	0.230752	1.19062	0.351747	0.261563	0.514947
NM_138455	115908	CTHRC1	collagen triple helix repeat containing 1	1.31877	0.000142	1.41529	1e-05	0.354417	0.175945	9.2724	8.18179	10.3896	0.955184	1.44249	1.10031	2.44271	2.04566	1.91903	0.000156	0.440126	0.965899	1.50999	1.00123	1.29956	0.285995	0.752934	0.000177	0.721299	0.000131	0.000166	1.69372	0.839669	1.0059	1.65379	1.13958	1.48874	1.54639	1.59443	1.47832	0.455978	0.352462	0.368199	0.897285	1.35172	1.30855	0.811504	0.00013	0.829525	1.7838
NM_001332	1501	CTNND2	catenin (cadherin-associated protein), delta 2	2.99598	2.75537	0.002793	14.8644	14.0175	19.3538	5.10763	3.08952	4.67643	6.80701	5.19039	5.21296	7.17333	5.83619	5.83662	6.10797	4.32056	4.09961	5.42518	7.24945	5.13814	3.8585	5.15609	3.12649	6.53446	8.42075	5.03857	3.80814	3.89729	3.47674	9.48561	6.26286	5.39842	3.19924	7.03596	9.57191	9.0811	11.3287	4.7546	4.51814	4.64427	3.72383	0.715208	4.77693	5.39398	1.73723
NM_003589	8451	CUL4A	cullin 4A	8.67025	3.27854	5.03153	3.23321	5.34774	0.459659	5.94547	6.05117	5.72358	2.16662	0.039938	1.53098	5.77609	5.28663	2.66958	2.90886	1.08721	3.62858	4.05489	4.49594	4.96079	3.0725	1.91816	7.60492	6.72493	4.81129	3.7014	1.99614	0.001298	1.24639	2.74228	3.89126	4.15362	8.59447	6.72074	5.74103	3.21645	0.742521	2.11602	1.41984	4.38883	4.11517	7.70396	6.3031	3.87595	8.82245
NM_018659	54360	CYTL1	cytokine-like 1	6.05397	4.4854	3.39965	0.310484	0.524457	0.234186	1.39929	1.81644	1.65301	3.65313	3.98829	3.83443	5.32418	6.0137	6.53005	1.17178	1.75622	0.767452	2.97031	2.35037	2.18294	5.67543	1.91867	2.57178	2.2384	0.630848	2.10535	6.3495	2.3442	1.26337	0.826388	0.927999	0.602826	1.49222	1.49613	1.28784	0.607603	1.01547	1.30561	1.19379	1.72581	1.53322	2.90001	4.59123	1.89675	4.43264
NM_001017920	92196	DAPL1	death associated protein-like 1	0.862204	0.148736	23.487	1.82774	1.73033	1.15582	113.436	100.466	95.5406	1.81244	3.22791	1.21993	0.694893	0.46369	0.148763	0.513687	0.914148	0	0.523525	1.96017	0.82897	13.5199	1.63807	12.8618	0.873365	0.416482	0.530052	7.68946	1.01923	0.16231	7.0877	10.2274	11.688	19.8032	51.3003	25.8815	0.134008	0.341109	1.42478	3.38173	0.164925	0.457893	1.43563	1.39007	0.516756	0.170236
NM_001042610	79007	DBNDD1	dysbindin (dystrobrevin binding protein 1) domain containing 1	3.3862	0.722509	3.86552	8.02156	6.01632	12.7704	3.44814	1.69458	3.59998	5.41825	5.4066	3.6649	3.84808	6.15191	6.14935	8.13131	10.1604	1.62519	4.59605	3.4804	2.3531	2.46299	4.39042	0.884486	3.36528	5.17154	1.69594	5.06719	8.09933	8.45281	8.55696	2.65034	5.78558	2.75234	3.8e-05	2.63888	6.23238	8.48319	3.4455	6.24057	2.37528	2.92605	0.707988	0.000105	0.830756	0.818831
NM_001014436	28988	DBNL	drebrin-like	5.45195	22.632	12.0597	12.5263	12.1165	12.8554	10.0777	10.5498	6.95531	12.8344	14.0058	9.33757	14.7505	19.6367	18.8735	24.7061	20.4367	13.5476	15.3728	14.9989	13.2489	18.0189	13.9654	7.70375	12.06	7.52648	11.7626	13.0427	13.8864	12.5291	16.1111	7.90519	8.18944	13.0971	14.2344	14.155	6.38466	9.563	8.61631	17.2194	17.6974	17.9189	20.1637	19.528	23.9332	18.8601
NR_073047	162989	DEDD2	death effector domain containing 2	7.57738	5.19251	3.90975	1.76822	4.66826	0.584908	4.6593	6.55585	4.80071	2.95288	2.96351	3.0895	3.79176	5.69703	0.004514	5.88913	8.50357	2.84827	7.36328	4.25389	7.66361	5.71255	7.14625	5.44285	9.51951	8.19618	10.2276	4.00033	9.87466	5.86617	4.10657	4.87198	4.3051	5.24364	2.45552	4.34638	7.81458	3.7058	11.484	5.96307	4.91511	0.784182	2.19812	6.58577	3.49674	6.8652
NM_018369	55789	DEPDC1B	DEP domain containing 1B	4.11223	8.81673	5.36342	2.21752	1.63254	1.27963	4.53728	4.19501	4.6235	2.27227	4.29606	3.11686	2.24351	2.16726	3.33738	1.9e-05	0.960644	1.55914	2.86021	2.44718	2.60237	3.71255	4.01715	4.07398	2.15298	0.820751	1.36504	1.8362	1.60803	2.3361	7.95944	6.63345	7.52037	3.29954	3.70616	3.22381	3.52544	3.2549	2.7432	2.47684	2.80173	2.38909	2.0612	2.26973	2.33021	2.07574
NM_001927	1674	DES	desmin	17.9069	4.87179	12.8374	0.456501	0.105341	0	4.10166	3.56067	4.00668	8.54441	4.22692	0.67404	17.2622	8.79902	12.5732	3.70948	4.75143	5.27491	8.05956	2.75313	3.74705	2.28024	2.65819	1.03691	2.06219	1.46948	1.2411	6.07285	6.03098	3.89482	3.83103	3.99485	0.277424	3.53359	4.98924	3.76968	2.19375	1.76374	2.20485	2.06431	3.52799	2.69348	3.86155	4.22005	5.0393	1.31521
NM_198083	317749	DHRS4L2	dehydrogenase/reductase (SDR family) member 4 like 2	4.70013	3.69702	4.8248	0.000273	0.000287	0.000333	2.48541	4.4006	6.05364	1.3179	1.90689	2.77504	4.87686	2.73878	5.42408	6.47696	5.45411	1.0139	5.71389	4.8125	3.24826	2.64153	2.35025	0.775137	0.572108	3.29149	3.77264	3.1342	3.20979	1.93359	1.3212	0.452073	0.341181	1.67466	3.22995	3.45437	0.317591	0.401307	0.365341	4.26828	1.52578	2.5464	6.26289	3.23199	6.62254	4.51816
NM_001291628	23405	DICER1	endoribonuclease Dicer isoform 1	5.30226	0.930443	7.98531	4.79347	2.08311	3.75237	6.65293	4.45549	1.95146	3.12996	2.18575	4.89284	6.71305	2.47831	5.50133	0.003662	1.50358	2.7218	3.76631	7.07894	4.49861	6.01694	3.95235	11.0346	0.867406	6.0034	2.08549	0.016027	2.51491	1.9135	4.88934	7.23516	6.76718	2.85696	2.6666	0.024966	0.005383	1.4928	3.16606	1.97176	0.263678	0.169017	4.02344	5.26003	2.67833	5.76294
NM_080796	11083	DIDO1	death inducer-obliterator 1	5.87675	3.7128	7.58342	5.48339	5.76467	5.09645	4.59189	2.67141	3.97942	6.75681	4.53299	3.2885	8.16649	6.41587	7.69207	4.10744	3.98978	7.97113	3.42507	2.23224	3.05317	7.10455	4.02082	5.84765	5.58511	6.08245	4.95127	0	1.91516	0.615186	0.413233	0.286614	0.436246	2.63786	2.94859	1.57455	3.60418	2.79625	1.74254	1.3731	3.57061	2.08055	6.70305	6.88054	7.86533	2.00771
NM_012242	22943	DKK1	dickkopf WNT signaling pathway inhibitor 1	15.3828	2.84815	4.0302	1.18591	1.52469	1.405	17.3015	14.0539	15.405	6.26731	4.68358	5.66669	16.522	22.4953	11.0694	2.3142	1.92423	2.5063	11.839	6.15059	7.55903	16.2039	9.34891	9.0396	3.63877	1.31892	1.74033	6.9608	2.12248	1.67261	3.78922	1.67666	1.36429	10.539	11.2979	8.10705	1.08343	0.639373	1.41956	4.01937	6.85243	7.19287	6.24505	7.63858	9.71048	41.4098
NM_001081562	1760	DMPK	dystrophia myotonica-protein kinase	1.45561	1.52585	2.52504	1.33719	2.17705	2.08549	2.87644	3.01547	3.49514	4.15031	1.051	2.56134	2.45666	1.90054	2.78584	3.3403	3.93367	0.479749	3.08261	3.55185	4.276	2.76836	2.54859	1.08144	2.51251	2.03493	1.01638	1.8e-05	2.19356	2.6343	3.04491	2.56922	1.25411	1.28752	1.77655	2.98369	2.67058	3.05355	1.41961	2.48061	1.04748	2.57387	3.26048	1.66547	2.36556	2.13013
NM_001009933	1774	DNASE1L1	deoxyribonuclease I-like 1	4.15708	0.001875	1.94242	0.37216	0.810926	0	5.38773	2.63944	4.09292	1.18786	1.63881	1.89762	4.28365	5.62819	3.78268	3.39138	2.71714	3.92172	2.85275	3.7209	4.42497	5.07013	3.35177	3.04584	2.07759	1.43966	2.42532	3.83764	2.08765	2.01116	1.09825	0.614437	1.18328	3.69955	4.30225	3.60508	0.000185	0.753397	0.891317	2.86552	4.1167	2.83339	4.09874	3.44215	4.58194	7.59687
NM_001080849	728489	DNLZ	DNL-type zinc finger	3.27364	6.7801	3.83706	9.5732	8.72985	9.13565	6.96684	5.52188	7.8152	4.83789	7.92979	5.09169	4.69379	7.43846	9.62383	5.96037	6.46588	1.54109	3.87418	5.29086	3.9985	7.4645	7.63834	6.7676	3.66199	3.10941	3.12806	10.5661	8.15042	9.57294	10.9055	7.16223	9.00531	7.10568	6.17545	7.50637	5.03985	4.42043	7.34282	9.25425	10.0777	6.11318	6.563	6.1088	6.44265	3.0077
NM_001005336	1759	DNM1	dynamin 1	2.77352	2.4965	1.72467	3.96941	7.10498	7.20372	2.47518	1.69277	1.57695	5.30215	5.09574	4.75103	2.439	1.61666	2.46145	1.93832	4.66651	0.001332	4.51121	5.1684	6.48492	4.51831	6.92985	1.81961	2.28352	0.731481	1.78852	1.21276	3.6008	4.51104	3.44062	4.28471	2.91309	2.31558	2.83273	3.78604	4.6483	4.66867	0.137778	1.85034	5.34369	3.95506	2.6e-05	1.46018	2.75241	0.001455
NM_012062	10059	DNM1L	dynamin 1-like	6.53239	4.07193	5.12931	10.9553	8.18706	6.32	5.0907	6.07475	6.40552	3.43756	3.22054	6.51358	6.53428	5.02749	3.64284	0	1.70718	2.73248	6.29724	6.38628	5.43301	5.56707	6.10181	8.17001	3.47792	2.81979	4.98047	2.69369	2.1202	4.53837	7.07932	8.41705	7.1391	6.17423	6.09955	5.40088	9.59264	6.75376	7.61548	3.48203	4.8442	5.21405	3.98271	5.87683	4.62001	4.09177
NM_001135155	8193	DPF1	D4, zinc and double PHD fingers family 1	3.14576	2.69014	1.71637	12.4775	15.3938	15.0389	2.41139	1.52234	1.97905	6.0232	6.66174	5.38477	4.16967	4.23524	5.07159	5.36586	5.9768	1.83041	4.06208	4.78346	4.869	3.378	6.19767	4.45347	5.09898	5.37419	5.63292	5.66005	4.49239	5.71672	11.8265	7.42728	1.84371	10.9865	11.2188	10.8193	9.40097	9.33709	9.1655	8.90235	7.255	7.13918	3.38383	2.16777	3.03972	0.261593
NM_005700	10072	DPP3	dipeptidyl-peptidase 3	4.93451	6.86257	6.35652	6.64651	5.82621	5.53757	3.07334	4.15834	4.26931	3.97811	3.81136	3.59246	3.39729	5.39722	4.88001	6.68466	9.54538	1.82396	6.19415	1.90364	2.87223	7.6814	6.96926	5.9716	6.83623	6.44829	7.15888	5.01176	7.78561	4.65902	9.18123	8.17979	4.45547	3.01002	2.91075	3.25614	4.39438	6.21264	3.5954	6.13938	7.12858	6.34126	6.70638	5.73365	6.83741	0.007649
NM_018189	55211	DPPA4	developmental pluripotency associated 4	0.676623	0.25814	0.94864	0.814936	0.99318	0.888343	1.63738	1.29756	1.19384	0.218021	0.187188	0.176599	0.84591	0.330135	0.65694	0.642335	0.529755	1.18768	2.17295	1.52195	1.28194	1.06998	1.71939	2.26128	0.73452	0.796213	0.564865	0.178756	0.173808	0.141308	4.08005	1.36965	12.0742	0.944224	2.4233	0.740335	0.038295	0.049517	0.02587	1.17795	1.04248	1.08049	0.384793	0.445068	0.426283	2.23967
NM_000795	1813	DRD2	dopamine receptor D2	3.46525	2.19998	2.44564	0.6879	0.855624	0.971657	2.74223	1.89779	2.26875	1.20914	1.02821	0.747002	2.43786	2.14555	3.84593	1.24066	0.967365	0.540723	2.37583	2.26394	1.85627	4.24128	3.15215	2.83393	1.19265	1.12447	1.53126	0.796916	2.41597	1.58184	1.96641	0.00022	0.807376	1.65504	2.08221	1.02035	0.541015	0.263857	0.000222	1.60466	1.51223	1.91511	1.28537	1.50939	1.75585	5.51125
NM_024422	1824	DSC2	desmocollin 2	6.65663	4.07935	7.66547	0.394921	0.392612	0.331764	8.82211	9.24179	9.90429	1.45733	0.416509	1.7611	6.51127	7.31186	6.33535	1.18539	0.055757	2.77271	6.44718	5.4495	6.24028	10.1045	6.61118	9.58711	1.3782	1.22137	2.14349	1.63508	1.68431	2.31875	2.17367	2.90927	2.02354	4.18611	4.68073	2.50804	1.05928	0.653036	0.709593	2.58368	5.12366	6.15542	5.42127	5.70436	5.47499	17.2106
NM_001941	1825	DSC3	desmocollin 3	14.2292	2.45847	6.38632	0.027258	0.009939	0.017403	9.60841	9.90763	8.51147	1.06887	0.002895	0.84191	9.07115	7.52673	7.21847	1.26527	1.36296	1.84448	5.82193	2.66346	3.41009	6.2026	6.269	5.31488	1.77449	0.322733	1.28501	1.14172	0.002426	0.863547	2.13911	1.67734	1.0087	7.0176	5.5153	3.23891	0.194888	0.222125	4.9e-05	2.21555	5.29413	4.40622	4.26229	5.86017	4.91219	21.0444
NM_001145315	79980	DSN1	DSN1, MIS12 kinetochore complex component	3.03378	5.32022	3.24861	1.51648	0.003923	1.27523	1.86687	1.69237	0.652333	0.987098	0.925388	1.09451	3.69747	1.43625	1.60554	0.761299	0.772027	1.57858	2.4039	2.04157	1.88956	3.03094	1.88129	1.6742	1.81831	1.08024	1.56637	0.825868	0.68899	1.05465	2.81149	3.11371	2.00264	3.4487	3.25358	2.24279	2.28081	1.27881	1.7729	2.00967	2.4827	1.45826	1.90021	0.766655	1.56809	2.32467
NM_004415	1832	DSP	desmoplakin	9.00613	1.65188	10.4722	1e-06	0.09775	0.080231	11.1255	9.53053	10.9705	2.04479	0.621615	1.65609	6.28093	7.69717	5.93188	0.766008	1.33066	1.6453	6.74776	5.83809	5.66222	9.9181	3.57	6.65337	1.10877	0.853648	1.28641	0.727922	0.934573	2.21734	3.52254	3.36722	3.44283	7.01494	9.56585	3.758	0.573469	0.492139	0.683251	4.31179	6.33364	8.6736	6.34252	6.98599	6.00834	25.0082
NM_006483	9149	DYRK1B	dual-specificity tyrosine-(Y)-phosphorylation regulated kinase 1B	3.62536	4.4383	3.94104	3.49206	1.69908	2.09172	4.09521	2.72504	3.88094	1.57919	2.58211	1.87285	2.55431	3.34634	2.38245	6.39909	3.95035	3.92486	3.01456	4.42421	2.82488	4.84725	3.48652	2.01631	5.39556	0.000786	2.19907	3.75192	4.99017	6.02462	3.62445	0.00035	1.65449	1.78401	1.57045	4.18256	1.4838	1.80368	0.839494	3.38402	4.98033	0.003865	5.2847	4.37324	5.74392	2.20189
NM_198256	1876	E2F6	E2F transcription factor 6	1.28731	3.4434	2.87282	2.82988	2.56362	1.04292	2.54219	2.1536	3.27688	2.50343	2.77595	2.90089	3.14921	2.45847	2.53322	0.578587	0.008205	2.45623	2.5309	3.33837	1.31278	2.39453	1.69808	2.95234	2.72289	0.62741	1.21245	0.810644	2.2291	1.06981	3.61511	2.56429	3.23567	2.83421	4.10209	3.09917	2.57715	1.67735	1.60839	2.21164	2.621	2.31933	3.02651	3.13133	2.98472	3.23352
NM_001039349	2202	EFEMP1	EGF containing fibulin-like extracellular matrix protein 1	10.0407	2.29105	7.81547	0.885738	0.826264	0.536565	6.15447	5.6442	8.9685	1.56958	0.826779	1.24267	13.3511	7.97068	8.87255	3.88472	4.29941	8.98206	4.93264	4.1436	4.43801	6.98257	4.46133	5.6957	8.17285	6.12506	10.1541	8.68293	6.45429	7.48871	3.174	3.19112	3.22946	3.24511	3.91657	1.23593	1.68032	1.70551	0.41139	1.56774	2.36076	1.75016	3.31474	7.28982	4.7346	7.41881
NM_001243252	80303	EFHD1	EF-hand domain family, member D1	1.19889	1.86423	2.26101	0.995667	1.40881	0.433431	1.86284	2.40504	2.95052	1.9743	1.55287	1.37241	2.16283	2.08374	0.753648	1.52619	2.91928	1.79619	2.96077	4.28981	3.46197	2.57918	3.73922	3.3173	2.8375	1.87068	2.69622	2.69215	2.09221	2.53742	3.53073	0.000362	0.094218	3.46029	3.49167	2.3237	2.65524	2.36286	1.81029	5.19717	5.45358	4.28013	6.60504	2.45775	7.09135	3.17904
NM_019843	56478	EIF4ENIF1	eukaryotic translation initiation factor 4E nuclear import factor 1	1.88664	5.91947	5.01037	7.10136	7.82037	6.67559	5.41487	5.76322	1.05028	2.45127	0.001288	3.96825	2.15489	4.56379	2.3311	0.553554	1.86552	4.92655	1.76781	4.71525	2.07775	2.47739	4.49472	2.25404	4.09143	4.70432	3.96613	1.85893	2.1178	2.85992	2.19039	6.95506	6.65432	2.58767	5.47306	5.71057	6.75489	2.51441	0.004211	2.40034	4.0323	6.35503	2.65161	4.66915	4.52892	4.60761
NM_172373	1997	ELF1	E74-like factor 1 (ets domain transcription factor)	6.17313	3.13166	3.95753	0.933153	0.795446	0.784805	4.97715	4.96146	6.05532	1.76414	0.579819	2.23145	4.63884	3.01477	4.08826	4.5e-05	0.657395	2.17504	3.57006	3.06147	1.36062	4.07782	4.31885	4.80305	2.51782	1.20773	0.952983	1.80043	1.20488	0.594546	0.715994	1.85827	2.20576	1.88662	3.14537	1.5914	1.27582	1.02955	1.2107	1.48022	3.3761	2.9483	2.86623	4.40228	3.79909	8.8033
NM_001127197	2000	ELF4	E74-like factor 4 (ets domain transcription factor)	0.815313	1.94605	1.51764	0.000444	3.4e-05	0.362008	0.104805	2.52374	1.22619	0.024083	0.900243	1.0132	1.48757	3.25789	2.11558	3.98592	3.82723	2.928	4.46935	4.06973	1.37833	2.85349	1.90489	0.395782	1.62108	3.34465	0.056607	2.23389	0.054703	2.35718	0.838074	0.591125	1.84326	2.43584	2.59921	1.69736	0.723176	0.785735	0.365185	1.45421	1.40857	4.77863	2.95534	1.24572	3.06797	5.03241
NM_001130037	55531	ELMOD1	ELMO/CED-12 domain containing 1	0.921338	0.302145	0.761637	4.81628	5.26626	3.74886	1.06919	1.31544	0.661938	3.12782	2.66941	2.30323	1.11623	1.04675	0.909463	1.11923	1.35363	1.53926	1.45492	1.15228	1.3013	2.64405	2.11559	4.33089	2.23777	2.8956	3.8978	1.28901	0.7874	0.646067	0.000151	2.02579	0.733712	1.76974	2.5219	1.04928	1.17372	1.80776	0.510235	3.22647	2.5678	2.7359	0.867399	0.850157	0.484313	5.08135
NM_133455	129080	EMID1	EMI domain containing 1	2.73557	6.93804	2.65548	1.9756	1.6154	2.9221	2.05272	3.71686	3.4154	2.67054	3.18336	0.012125	5.38796	6.17578	6.13211	4.05649	3.77267	0.035359	3.36663	3.57185	3.91084	5.38604	4.78536	2.53973	2.6879	2.30363	2.72402	7.84871	6.95558	7.41942	6.30496	6.9531	6.08307	4.76014	4.38505	4.64892	0.024878	2.92283	4.50303	4.1596	4.06421	3.20631	3.49014	4.07736	4.32064	2.9472
NM_153265	256364	EML3	echinoderm microtubule associated protein like 3	2.9301	2.74583	2.97179	0	0.35061	0	4.55967	3.70939	5.41202	1.72002	0.000149	0.592763	4.43041	4.52486	3.62099	6.73031	5.54858	4.28612	4.38821	3.17057	4.06354	3.74463	3.44076	1.89501	3.25597	2.91674	2.27883	2.08236	2.16338	1.8398	1.93622	1.04664	1.18872	1.72263	1.69509	1.69915	0.463223	0.904913	0.629178	2.2463	2.6865	3.16986	2.45759	3.24779	3.80687	6.07042
NM_004097	2016	EMX1	empty spiracles homeobox 1	0.053755	0	0.248825	0.470037	0.455536	0.218229	0.034057	0.088341	0.028451	0	0	0.028915	0.025798	0	0.305596	0	0	0.063521	2.20963	4.35707	4.76036	0.260863	0.484983	0.998665	0	0	0.06725	0.100299	0.032507	0.030845	2.08608	2.4052	2.67775	5.42075	4.54317	6.66725	9.86336	9.79257	10.5367	1.25191	0.372559	0.982151	1.70783	1.03317	2.06866	0.03224
NM_001281535	23136	EPB41L3	erythrocyte membrane protein band 4.1-like 3	8.88032	4.653	7.87175	2.64402	3.43686	1.51438	7.06694	8.88282	8.33979	2.03744	1.47557	2.74712	3.89897	2.85507	3.91046	1.81511	1.69349	3.02157	3.08708	3.71547	2.22506	5.6814	3.10908	5.65226	4.0922	3.46547	4.36841	2.39606	1.30601	0.914938	0.094065	2.64989	2.09587	6.57112	7.78343	5.90706	3.08835	1.48935	1.76159	3.4896	4.69168	4.3043	4.38808	6.20748	4.39895	6.0183
NM_002354	4072	EPCAM	epithelial cell adhesion molecule	10.8529	7.29758	6.64825	2.89427	1.89239	1.73597	5.14359	6.12584	5.96594	3.23422	1.91407	2.37052	7.83372	7.85597	7.85338	0.631911	0.902897	2.39827	6.36263	2.93976	4.05175	10.9112	6.39954	10.7083	3.23732	0.645389	2.31848	2.82614	1.39505	1.76584	4.19895	3.17781	12.499	6.29747	8.63588	3.95426	4.3475	1.56095	3.34994	3.52372	6.50787	8.08301	3.97041	6.16858	4.14319	16.5315
NM_001256484	2053	EPHX2	epoxide hydrolase 2, cytoplasmic	6.54316	5.01265	4.8208	2.10604	1.51106	0.382753	7.60228	6.77651	5.76092	6.89387	6.11974	5.53479	11.5073	2.96056	9.79638	9.42975	8.23508	9.34492	11.0333	7.91652	8.39766	10.3489	4.30318	4.62243	8.49028	8.34846	14.0808	5.14917	6.34061	4.68083	5.31862	0.199628	3.32569	5.52362	4.60081	3.33984	3.55021	2.83815	1.45774	6.68769	7.51454	7.32108	12.7723	10.9499	8.27967	9.69461
NM_004950	1833	EPYC	epiphycan	0.079137	0.207131	0.274999	0	0	0	0.250517	0.032501	0.125637	0	0.270258	0.382543	0.152044	0.764762	0.081813	0.095188	0.050995	0.280329	1.19238	0.193158	0.366306	0.143924	0.203606	0.354251	4.58309	2.07277	1.77869	1.52203	0.859258	0.135993	0.334979	0.256525	0.262451	0.481423	0	0.046071	1.14524	2.09666	0.497855	0.556436	0.137023	0.127416	0.041143	0.038921	0.192959	0.047399
NM_178040	23085	ERC1	ELKS/RAB6-interacting/CAST family member 1	4.5164	2.52191	4.15747	0.049894	1.48317	0.741447	4.42093	3.26254	4.88117	1.90854	0.682939	1.99238	2.52241	3.21162	3.56723	1.12412	1.77974	2.65235	2.67623	2.79843	2.10234	3.89002	1.62836	3.30964	2.56389	0.49885	1.6845	1.46253	0.023613	1.27723	1.76355	2.98494	2.63403	1.81982	2.69215	1.74958	2.04787	2.58157	0.001593	4.13783	4.45631	6.36238	2.50711	2.9869	4.57632	5.04108
NM_004451	2101	ESRRA	estrogen-related receptor alpha	1.85881	2.63239	1.5876	3.88929	2.6133	3.20596	3.10132	3.70049	3.30186	2.15718	3.00158	2.08812	2.0617	2.55931	3.79023	8.10178	3.82181	1.06947	3.6023	3.39179	4.81327	3.88664	5.49139	0.968065	2.52217	4.97336	6.01422	4.71699	5.86463	1.72514	4.83695	3.50156	3.3246	2.57799	3.34452	4.70593	2.593	2.95769	4.82769	4.82376	4.9937	4.2493	0.013952	3.90925	2.07147	3.03728
NM_000129	2162	F13A1	coagulation factor XIII, A1 polypeptide	13.9843	2.70159	5.32139	0.081824	0.083122	0.079675	0.652596	0.084614	0.155684	1.2985	1.3267	2.24964	3.76558	6.51834	4.34635	0.017727	0	0.017389	3.62782	1.20654	1.34524	11.9779	4.44309	7.94546	0.054537	0.071395	0.092151	0.311698	0.481353	0.507119	0.643378	0.438737	0.039119	2.43129	1.07432	0.428236	0.192261	0.266564	0.519937	0.334944	0.713887	2.18369	6.55193	2.7157	4.08618	8.15989
NM_001443	2168	FABP1	fatty acid binding protein 1, liver	24.1585	18.8038	6.68884	0	0	0	40.0541	37.9992	42.7076	3.01462	3.22218	6.0883	7.65266	2.93578	14.6935	0.325482	1.04285	4.48613	30.2135	7.71428	8.34783	12.5165	10.9026	14.8119	8.46915	0.52759	4.03188	5.31898	4.20084	2.00608	9.23323	10.2454	11.1099	12.4266	13.9106	9.19989	4.70988	2.43235	7.62009	8.47453	10.0294	14.3624	6.85974	6.4769	7.53464	2.91268
NM_181709	144347	FAM101A	family with sequence similarity 101, member A	8.50113	1.23529	4.38096	0.113783	0.000917	0.497438	2.96886	1.34587	1.82409	1.23682	0.002006	1.44774	3.51892	3.48936	4.0175	3.44722	4.07368	2.53908	3.82411	5.02934	3.63324	4.69675	4.03931	3.92855	3.04778	0.008157	1.64195	5.92666	4.49922	3.6517	9.4e-05	1.9042	2.5823	3.54582	3.5466	1.66941	0.747969	0.000168	0.377717	0.00239	4.22885	2.02743	3.06811	3.72816	2.73543	6.00388
NM_001289147	83541	FAM110A	family with sequence similarity 110, member A	0.840307	2.86074	2.12459	2.19159	2.86098	1.13603	3.73689	2.36692	3.51949	2.84342	0.72455	2.86107	2.2236	2.00424	2.71646	0.005365	3.32014	0.727516	2.48469	3.01979	2.53299	1.1925	1.99917	2.59401	1.448	2.19905	1.42729	3.77894	3.86866	2.55966	4.8693	4.65874	4.20077	1.49184	3.02827	3.3961	3.37639	2.55681	2.91295	3.04427	2.69447	0.741154	0.00038	0.001359	0.697442	0.981897
NM_032448	84498	FAM120B	family with sequence similarity 120B	5.03791	5.76306	7.19571	5.38081	4.74602	4.46464	5.45531	6.96666	6.4362	3.55761	0.004506	3.22313	5.11279	4.48358	5.23083	1.35995	0.952759	1.71321	4.13099	3.15098	3.99212	6.3101	6.28839	8.11135	3.05868	5.72445	2.01984	2.9945	2.99218	3.21354	9.7e-05	3.69965	1.69587	6.03884	5.73125	4.52413	2.81619	2.95751	2.5647	3.70927	4.03992	5.2245	6.41025	5.90958	5.14803	5.61111
NM_001171093	131408	FAM131A	family with sequence similarity 131, member A	5.54301	4.94261	4.42526	6.02756	4.68226	6.67211	5.52194	5.15074	5.50569	4.48699	7.08792	5.9789	5.65501	7.99039	8.10356	11.3	11.0612	2.9941	6.32414	6.34421	6.26508	5.8277	8.06549	6.06432	7.70593	8.70172	8.09882	9.80792	10.9756	11.4939	10.6405	8.0706	8.85669	3.83475	3.44602	5.89062	7.17026	9.47367	8.63143	7.19497	7.43339	6.95913	7.70653	7.52525	5.77811	4.67474
NM_152789	257415	FAM133B	family with sequence similarity 133, member B	3.55396	4.11906	5.70892	2.61382	3.00427	3.44496	3.83715	2.79663	3.45995	2.78997	1.98383	3.33808	3.94188	4.23141	4.82438	1.79281	1.19896	0.925103	3.34134	2.68945	2.82488	4.99643	2.28361	3.67307	2.93946	2.70664	3.14856	2.69154	0.185557	2.59336	6.28468	4.45977	3.44339	5.12769	4.04809	3.21916	2.81319	2.19439	1.19875	3.49901	4.43387	1.10378	1.01798	4.29396	3.27092	3.5438
NM_001164310	730112	FAM166B	family with sequence similarity 166, member B	2.43212	1.23759	3.76563	0	0	0.161064	0.528295	0.89406	0.841345	0.695333	0.338733	0	6.01649	7.14447	6.48584	13.0915	11.1068	7.1068	3.36102	5.48834	3.63718	9.99765	10.8781	3.8012	12.6951	11.5436	9.81562	11.8252	14.1958	8.16279	1.74077	1.99696	2.38522	1.10142	0.40015	0.260547	0.44201	0.931508	0.471054	3.10957	1.88851	1.82212	5.44004	10.5623	8.05057	4.61793
NM_023933	65990	FAM173A	family with sequence similarity 173, member A	2.73363	2.97719	3.46895	3.48083	4.06711	5.86067	6.10923	2.58663	4.63749	5.87027	6.55724	2.90958	5.15056	6.04854	6.86427	8.47951	11.0787	2.7348	5.9936	5.84561	5.76654	6.63865	7.8164	3.22914	6.46411	5.78697	4.36049	6.27529	8.00768	9.96725	8.34705	9.33874	6.84094	5.98488	3.06474	1.64963	2.99906	4.89764	6.98635	5.77085	6.74774	6.41931	5.49035	8.79076	10.5896	4.98499
NM_001101376	440585	FAM183A	family with sequence similarity 183, member A	6.48052	4.62613	17.3069	0.490629	0.247603	0.41333	1.5532	4.41965	2.11997	1.13411	1.21145	1.96243	22.3994	19.8358	15.3365	43.5941	39.9961	23.34	13.628	15.3311	11.9237	18.7879	19.903	8.54605	29.4994	33.0788	28.6024	30.0259	32.7651	12.1823	5.43532	3.59322	4.4482	3.91834	1.46774	2.8681	1.15097	1.82864	1.71847	7.91359	7.25645	4.09287	19.2604	29.5784	24.1882	10.7727
NM_001257990	25793	FBXO7	F-box protein 7	25.8238	27.59	19.5155	12.6659	13.435	6.25123	26.621	26.7337	26.8726	10.9975	13.7722	17.6761	20.4845	12.1551	13.1033	6.31143	7.88493	23.9779	14.6434	15.942	15.147	24.3428	16.9082	20.2782	19.9038	20.7765	24.7091	15.4769	12.0188	9.66863	16.4283	10.265	15.9722	15.6564	19.1501	14.1545	13.0945	11.2596	13.1215	16.1394	20.6016	17.386	21.0159	22.4649	18.9117	23.7409
NM_004106	2207	FCER1G	Fc fragment of IgE, high affinity I, receptor for; gamma polypeptide	9.05449	1.19006	1.93312	0.202757	0.10245	0	0.803493	0.104454	0.269649	1.07393	1.72235	1.35584	2.34096	2.46837	2.50787	0	0	0	2.32398	1.11866	2.64966	8.92887	4.20967	3.86695	0	0	0.157173	0.93343	0.151225	0.144357	0.718997	0.330153	0.167587	1.70898	1.82327	2.22346	0	0.303399	0	2.04976	1.61142	3.39181	6.4174	2.59727	5.97729	5.1454
NM_021871	2243	FGA	fibrinogen alpha chain	6.70601	1.19869	2.26927	0	0.085836	0	9.0974	11.5742	11.0083	2.11798	3.52361	5.15731	5.4488	3.96955	10.2921	0.838479	1.19591	3.35375	8.56013	3.63058	5.63125	26.7444	11.0929	17.834	1.96436	0.309673	0.532235	3.73751	8.06577	2.04571	11.0796	10.2772	21.2287	26.5864	15.1721	8.00458	0.720004	0.160391	0.603308	7.40234	6.86237	21.8452	3.45551	1.80835	8.53435	2.24915
NM_001139498	2258	FGF13	fibroblast growth factor 13	2.20342	8.3e-05	0.000292	21.5886	20.9792	19.0769	0.886819	0.010154	0.0016	4.73442	7.10007	7.82275	0.001218	1.69602	2.88941	1.65802	0.330462	3.96452	1.5319	0.443469	1.87845	4.34861	4.74943	0.011023	10.7593	8.64637	11.5521	2.01889	3.15723	1.04628	1.50678	9.64958	9.87267	2.52948	2.44275	3.10396	8.47222	5.88987	1.94957	8.4097	2.86856	3.45791	6.46025	6.0539	6.65681	0.75267
NM_001174065	2260	FGFR1	fibroblast growth factor receptor 1	11.404	8.58055	9.77844	8.17599	8.3895	6.94296	11.4435	10.2364	12.6281	12.6607	12.6505	11.6141	8.96469	8.22703	7.6322	16.5365	14.4155	14.5348	11.3837	12.4784	11.4703	13.8946	11.092	9.26708	13.6178	13.4077	12.311	9.19373	10.794	7.96264	12.759	2.07588	3.79711	8.225	8.32372	7.32954	6.28281	5.89055	5.68395	12.6485	8.66956	11.2211	15.2701	11.8204	16.455	8.12355
NM_014890	11259	FILIP1L	filamin A interacting protein 1-like	18.9407	3.90944	11.7424	0.967874	0.688861	1.38409	7.22431	4.69834	6.06372	2.53574	0.909034	3.14694	12.581	7.49568	9.62521	2.25116	1.89501	1.98139	7.92863	7.15923	6.14084	8.02272	5.74625	6.84964	1.70133	2.14226	2.01192	2.51561	0.781944	2.44368	1.4593	1.39173	1.65801	9.14845	8.75204	4.7939	0.60272	0.948341	1.07271	3.72255	6.19356	6.51651	5.00717	5.32558	4.93355	19.8449
NM_016594	51303	FKBP11	FK506 binding protein 11, 19 kDa	21.4114	6.10719	8.57437	0.726115	0.281499	5.3e-05	11.1749	10.1488	11.1676	5.3355	5.66579	5.20004	18.7894	25.204	24.503	5.71385	8.83295	2.3426	15.6688	13.4311	15.2205	22.5982	12.1762	11.1085	2.75207	0.526609	0.804351	6.75087	4.6017	5.76954	5.51275	4.10156	4.89048	13.6333	13.0427	8.78525	3.33816	1.63475	5.16676	8.73146	14.9044	13.3787	13.5678	16.0417	14.4494	31.0239
NM_024301	79147	FKRP	fukutin related protein	0.782735	2.00602	1.50403	0.277024	0.764476	0.543444	2.75094	1.5615	1.1515	2.22012	2.60178	1.27293	2.7584	2.93147	3.39384	4.74878	3.69199	2.66681	2.30005	2.64141	1.79565	4.29625	2.83151	2.24704	2.13761	1.85266	2.54304	2.24572	2.25718	2.25851	1.0622	0.000581	1.43984	1.85224	1.45529	2.23527	1.13454	1.69425	1.01314	2.782	1.8529	2.78663	3.18642	3.42815	4.58023	2.18451
NM_001160030	2321	FLT1	fms-related tyrosine kinase 1	2.02378	1.22232	2.44204	0.058784	0.04993	0.053124	1.76786	2.51887	1.98398	0.749872	0.795266	0.767453	7.54768	8.02214	3.65166	0.273817	0.613701	1.17646	1.82113	1.16011	0.705889	7.56894	4.21963	2.78021	1.62989	0.13377	0.674426	1.05496	0.557088	0.568466	0.75089	0	0.057735	2.47683	1.87135	1.17313	0.113695	0.158468	0.114751	1.104	1.53526	2.01353	3.74753	4.93057	2.97298	19.512
NM_002023	2331	FMOD	fibromodulin	12.8557	8.2132	10.2499	0.265609	0.596374	0.031754	33.9983	28.8304	39.5943	7.27878	4.59715	4.65913	24.2424	37.9922	26.1367	4.64087	7.45439	2.67322	22.7846	21.9354	14.6179	59.2293	27.3581	19.7317	10.0275	2.15146	3.94373	4.66213	1.53185	3.39498	3.69821	1.96176	1.24939	9.38743	10.4624	7.66137	3.03835	1.86953	2.37523	11.1746	18.1704	19.6569	17.4892	20.7816	19.7965	48.0192
NM_001185076	2332	FMR1	fragile X mental retardation 1	8.31358	5.98854	7.66571	4.48003	4.27516	5.03391	5.76282	4.1148	6.675	3.24136	0.422831	2.48075	8.96573	7.29087	7.27943	1.31573	0.001877	1.38123	5.28754	4.34159	5.4524	6.36137	3.92683	3.44815	5.32812	5.19216	5.56367	0.539873	1.87441	3.31209	4.31179	5.30735	7.50139	4.09222	2.50785	3.08394	5.31793	3.41459	2.10968	5.80366	6.74055	6.16743	6.3816	7.31347	2.09295	12.505
NM_212482	2335	FN1	fibronectin 1	74.2058	36.2792	59.5764	2.31528	3.19833	2.52154	57.3433	66.376	61.4093	33.6446	14.8599	25.0568	78.7231	86.9909	71.1623	9.13686	14.1033	40.8912	50.7878	44.8954	40.6107	89.6213	59.7506	51.4799	19.4659	6.5369	10.6591	16.9852	9.53147	17.4084	25.3412	18.1363	17.3463	27.7986	45.6871	19.5482	4.20205	4.71713	4.16404	28.0702	30.9419	46.0491	44.5401	61.2311	47.266	138.797
NM_016724	2348	FOLR1	folate receptor 1 (adult)	6.41505	2.96005	18.4335	1.53996	0.33598	1.4998	4.48928	5.4334	5.62554	1.38496	0.749393	0	36.9099	38.9433	39.6956	127.885	95.2184	52.9592	13.6247	12.5569	10.7991	29.2134	25.1564	7.27133	45.0223	36.1712	42.941	38.0471	48.8858	39.9107	4.68175	1.1373	3.15128	0.146518	1.03321	0.991225	1.91153	3.69393	2.16773	3.9785	3.08787	3.29273	15.5156	19.0947	19.1179	12.7793
NM_005249	2290	FOXG1	forkhead box G1	0.071525	0.018766	0.889183	0.72492	1.35714	0.339014	0.453387	0.426225	0.416474	0	0.020413	0.057772	0	0.019193	0	0.043101	0	0.021142	4.5255	11.3175	12.0709	0	0	0.022939	0.044193	0	0.022401	0.178256	0.151657	0	24.984	12.2932	20.5189	25.8731	23.6469	30.3261	25.7497	19.3968	10.6304	2.65621	0.371976	2.59683	2.01422	0.141204	0.546945	0
NM_001243089	2305	FOXM1	forkhead box M1	3.9437	2.84837	4.25512	0.951697	1.5948	0.822307	4.7727	2.58294	3.46114	4.07693	4.11426	0.919024	1.89772	2.19129	1.01449	1.91874	0.721313	0.664822	2.61068	2.91831	2.51511	1.98366	1.28588	1.83978	1.41361	1.21282	0.445432	2.79743	0.004011	2.37181	4.28854	3.07151	1.35036	1.71723	1.63815	1.49848	1.9985	1.59863	0.910965	1.99607	1.84826	2.75182	1.90911	1.25233	1.22254	1.35179
NM_201559	2309	FOXO3	forkhead box O3	4.91685	4.33422	9.28286	4.59778	7.7443	6.33924	4.6588	4.4383	4.07838	5.13493	4.97813	3.76565	5.545	4.37411	7.45891	0.009536	0.000552	7.83374	7.31381	7.93274	0.004696	8.32123	5.25554	3.95013	0.26106	6.74807	4.86017	1.09107	1.9872	4.96574	5.43539	5.81389	7.43131	5.37279	3.17525	3.04573	4.11429	4.5899	2.47079	3.29693	3.12394	3.66424	5.27079	1.72484	5.86252	7.12443
NM_001102371	80020	FOXRED2	FAD-dependent oxidoreductase domain containing 2	3.56251	2.37659	1.40146	4.25301	4.78118	3.16911	4.37458	3.65437	3.03494	5.15335	4.35477	3.55104	2.80844	0.661333	3.40101	6.31635	5.17824	3.72085	4.09571	2.55269	2.96372	0.049787	4.48549	3.5022	2.37459	3.56969	3.12644	2.64679	3.8553	2.13873	0.010841	2.27242	1.80589	3.37241	3.52425	3.35929	2.76115	2.61263	0.91547	3.49251	2.0742	3.95673	4.45156	2.30218	4.22486	3.25179
NM_001463	2487	FRZB	frizzled-related protein	65.2634	13.6367	34.1556	19.087	12.3156	13.9768	122.882	93.415	146.743	22.6868	22.6545	27.245	61.576	51.6385	47.8415	15.4599	16.6021	24.8023	76.7309	56.6384	56.1576	59.2174	41.4626	50.0312	20.4443	6.51227	10.781	22.642	11.7667	14.3775	34.0932	20.1938	17.1112	79.9015	83.8121	46.0034	2.0686	1.51397	2.32016	48.8368	60.996	76.0509	56.0359	44.8024	58.1134	251.438
NM_013409	10468	FST	follistatin	14.2491	5.00639	6.06482	1.70974	1.4341	0.794987	2.15526	3.26999	3.20435	3.69579	3.75251	3.49445	9.76354	10.2505	9.47742	0.761049	1.30263	5.86042	7.02355	4.72784	3.97069	15.173	6.91436	7.60564	3.3521	1.29603	2.81104	2.466	2.1252	1.76206	4.1759	3.08956	3.02732	4.81075	7.33231	3.75887	1.84255	1.17525	1.79097	6.144	8.97268	12.0309	8.67281	12.4391	10.8825	25.4293
NM_004960	2521	FUS	fused in sarcoma	2.52911	5.40197	4.2024	2.1365	2.32363	3.19321	0.024012	2.13923	1.91027	2.49373	1.88459	2.62347	2.91507	2.49082	1.41974	3.2481	0.024513	0.41985	3.23431	2.43905	1.77882	0.690861	2.84551	2.25339	1.06226	1.26781	1.60942	0.023928	0.022977	3.57228	3.59223	3.13132	6.14129	3.66814	2.33059	2.95032	1.94268	0.728269	0.024045	2.64159	1.26442	4.49495	4.24823	4.65126	4.64814	2.25881
NM_021902	5348	FXYD1	FXYD domain containing ion transport regulator 1	3.41037	4.56095	8.72495	1.33718	1.9e-05	1.56084	7.5227	6.93152	6.76978	2.84212	4.51649	4.14795	8.74246	4.20221	10.0605	43.1201	26.5957	16.2415	6.24754	5.54827	5.80993	16.2537	14.3827	3.69417	33.3116	27.8252	23.5106	11.6998	20.2056	7.94648	5.05581	2.6577	3.82583	5.50696	2.35414	1.90468	0.838207	0.951037	2.09488	5.49301	8.36168	6.18301	10.9904	18.7307	11.1945	2.52446
NM_014164	53827	FXYD5	FXYD domain containing ion transport regulator 5	27.1361	10.4597	13.3539	0.316209	0.674778	0.267646	26.4967	24.5052	30.9978	7.36123	5.77367	5.64035	28.2182	33.2534	28.2848	8.85586	11.3864	6.8099	19.253	18.1427	17.9952	29.9346	20.0144	15.4523	7.66905	1.12896	4.54023	10.2237	4.74523	4.08347	8.22585	5.65022	6.52707	17.9335	21.4535	10.8589	2.91844	1.89048	2.92304	12.1752	22.0592	21.058	20.4602	18.8048	20.5581	50.2817
NM_003468	7855	FZD5	frizzled family receptor 5	0.849842	0.526756	5.86313	0.222931	0.253994	0.253385	16.7839	17.8107	14.6311	0.497578	0.301118	0.34818	1.89022	1.24951	1.64226	1.67092	1.01155	1.92026	0.970817	0.738895	1.30912	1.9298	0.966578	2.2161	0.72552	0.759398	0.852905	0.891189	0.691175	0.762662	3.10081	2.34847	5.38428	3.45737	7.88735	3.75243	0.373052	0.267265	0.29002	0.673359	0.805789	0.805279	0.772186	0.89896	0.645662	0.745647
NM_014211	2568	GABRP	gamma-aminobutyric acid (GABA) A receptor, pi	19.5168	0.253087	2.87233	0.041245	3.3e-05	0	6.13233	10.0377	7.52462	10.0997	4.487	2.62559	32.3061	52.0244	33.2193	1.60972	3.07463	14.1285	13.1811	8.06083	8.1923	54.1945	18.1321	26.0471	8.44572	0.319339	4.43092	4.64894	1.4381	1.54691	2.54356	1.55697	2.20548	11.7395	16.1655	7.42199	2.22772	5.5e-05	0.830001	6.55887	19.4055	22.377	13.1463	38.2697	24.6619	92.6086
NM_006478	10634	GAS2L1	growth arrest-specific 2 like 1	1.82636	1.19024	2.20837	1.39339	1.2985	1.61047	3.83909	2.91395	3.0398	1.88803	1.81665	1.62352	2.35872	3.41044	2.95777	9.95412	6.99432	4.04942	3.06998	3.1196	3.99392	3.70768	3.52244	2.08626	0.178649	3.98305	4.05279	3.87365	4.86231	0.083734	2.15326	1.37468	1.09958	1.94632	2.95858	2.22082	2.25158	1.69061	2.06586	2.11315	0.004225	1.82202	2.75642	3.11781	3.82057	3.89324
NM_001485	2637	GBX2	gastrulation brain homeobox 2	6.2603	14.3017	1.42801	5.54441	5.09967	6.19674	0.214645	0.195117	0.396135	4.07412	5.61999	3.69378	19.3421	14.3196	17.7615	2.8661	2.4599	2.21028	3.39475	3.25569	2.67767	2.59955	5.86984	3.44036	5.83165	5.09241	3.18894	11.5484	7.97182	14.8621	3.16851	2.51482	0.632257	0.04514	0.097354	0	0.7306	0.943103	1.07105	6.96023	6.04997	5.59071	1.87644	1.07178	1.07945	0.203118
NM_005110	9945	GFPT2	glutamine-fructose-6-phosphate transaminase 2	17.8644	4.81167	8.04343	3.53878	3.50166	3.53579	5.11056	5.30784	5.19839	4.12473	2.2462	4.2382	16.5153	14.561	11.4335	2.25639	2.2465	6.05367	10.3166	10.6183	9.09235	14.238	7.29774	9.26353	6.98749	3.67284	5.3605	2.92773	1.27292	2.8316	3.93687	2.87484	3.68324	14.3128	17.7916	11.1719	2.64071	2.2845	2.00127	6.91844	10.4657	12.0018	13.4788	14.6321	13.9062	34.1315
NM_005497	10052	GJC1	gap junction protein, gamma 1, 45kDa	2.17311	4.39183	1.48976	1.00586	2.07254	1.0175	3.93476	1.72131	3.60263	1.42049	0.336324	0.316269	0.904516	2.86455	3.11912	0.385089	0.501596	0.001397	3.37839	1.96475	1.65013	3.27912	2.78938	0.365365	1.61929	2.20778	0.000265	1.53588	0.436299	2.72509	4.35154	4.13219	5.73156	2.15831	2.70373	0.007861	2.95491	2.48089	0.944876	2.28502	0.783713	2.07336	2.55487	2.42996	1.29721	1.94613
NM_006851	11010	GLIPR1	GLI pathogenesis-related 1	7.51303	1.34257	1.24328	0.404308	0.363789	0.498683	0.386958	0.453938	0.446176	1.15957	0.697057	0.798485	3.45646	5.59943	3.40916	0.280308	0.413317	1.01392	1.63325	1.40528	0.908726	5.20414	2.32684	2.38738	1.13183	0.155223	0.673915	0.471125	0.334759	0.350818	0.389693	0.263918	0.135308	1.85129	1.91387	1.06647	0.366431	0.245874	0.256918	1.0088	1.22623	1.42306	3.54839	4.57833	4.58973	9.94923
NM_000824	2743	GLRB	glycine receptor, beta	1.69692	1.77754	2.17369	3.94662	3.77924	3.57029	2.28739	2.02728	1.7996	1.77465	1.99442	2.45628	2.90572	2.40035	2.22148	2.94454	1.92369	6.1041	2.52253	2.42553	2.20002	3.05651	2.6316	2.77393	7.26166	4.78582	6.69668	2.26002	1.7982	1.53824	2.05125	2.17209	2.34142	1.88498	2.05784	0.006317	3.95422	2.97691	2.40484	1.83396	1.78496	1.51527	2.50909	2.71376	3.10726	1.63438
NR_046719	100874110	GLYCTK-AS1	n/a	1.92377	4.71068	2.10345	4.50039	6.42403	5.29378	1.87756	1.4891	1.33775	8.03918	4.49598	5.54002	2.43127	2.77457	3.52375	2.24471	1.97966	1.88037	1.70588	2.28	1.97087	1.59817	2.32795	3.29694	2.77121	3.57027	2.87596	2.31192	1.58664	3.9587	4.65235	5.05853	3.34851	0	0.368737	0.575798	2.36022	1.84939	2.07006	5.93585	3.35978	5.36041	1.36865	0.916816	1.53735	0.525868
NM_001002002	51292	GMPR2	guanosine monophosphate reductase 2	13.0955	10.9511	15.4921	6.25045	6.46603	5.90875	15.3865	16.7273	17.5796	8.39716	6.20638	8.33537	16.0248	13.7806	11.1407	3.21184	7.33009	14.3936	11.7502	11.4181	10.2055	13.45	9.09866	14.5063	12.0269	12.8606	9.48894	5.58782	4.74667	3.67535	9.47582	8.73596	11.6403	5.43391	9.89038	8.72255	4.45863	6.72478	4.75403	13.0702	10.5438	11.2566	12.3146	13.7579	13.0294	22.6784
NM_033258	94235	GNG8	guanine nucleotide binding protein (G protein), gamma 8	0.977168	8.54703	1.19522	0.770429	0	0	6.02817	5.57115	5.19954	0	4.08025	2.90551	6.78626	6.29663	9.11605	0	1.16076	1.09519	0.861519	1.84838	4.35972	2.31179	0	0	0	0.926741	0	6.39985	3.11624	10.3111	0	2.4356	0	2.46366	1.77974	2.26474	0.885539	2.13256	1.1081	3.95491	2.18218	1.96458	1.87712	0	3.19825	0
NM_178331	2797	GNRH2	gonadotropin-releasing hormone 2	4.42688	8.27804	1.35661	0	0	0	0.286906	0.371742	2e-06	0.477401	0	0	0.587429	1.23243	1.19981	0.270704	0	0	2.58761	1.12271	3.89013	3.60777	1.58373	2.74541	0.029715	0.881621	0	0.548	0.789844	1.0377	2.16915	1.04602	1.64864	1.21496	0.887019	0.813426	0.759493	0.024089	1.7e-05	1e-05	0.69093	1.20634	3.00135	2.30879	3.70536	0.268794
NM_001017408	57120	GOPC	golgi-associated PDZ and coiled-coil motif containing	4.76219	3.19016	4.37115	1.93352	1.02163	1.96548	6.503	8.48465	10.1282	3.25264	2.77742	3.56156	8.21408	8.38625	5.82985	0.004386	2.15218	3.29425	4.8189	5.34851	6.09015	8.50196	5.2919	7.76747	4.55734	1.7982	4.92514	1.79676	3.43316	0.822548	3.1381	5.59918	5.2696	2.64866	4.48122	1.41539	3.53428	3.1831	2.09193	3.44325	4.65618	3.64018	5.17143	4.96841	5.56561	11.0797
NM_001244949	57678	GPAM	glycerol-3-phosphate acyltransferase, mitochondrial	4.70738	4.68218	5.18038	4.98637	5.76764	4.94971	3.69141	4.21742	4.18032	2.89804	2.45888	3.73899	4.15525	3.60012	3.81938	0.938062	1.16437	2.86268	3.38189	2.9881	2.68047	3.74477	3.91793	4.39536	2.99288	2.95375	4.03379	0.342258	1.91926	2.0958	3.15085	0.288539	5.73444	5.13037	4.51887	2.79791	3.72975	2.8098	0.295482	3.06474	4.21347	4.15946	2.23661	2.27004	1.65902	3.18169
NM_001267611	23432	GPR161	G protein-coupled receptor 161	4.06973	3.60833	2.75685	6.76828	8.2597	7.15947	2.9067	2.25682	2.61176	4.57219	1.82895	3.27344	4.39224	2.99173	3.85509	0.003963	2.0782	2.18354	2.34018	2.82401	2.45344	2.52036	0.8215	3.34499	2.22931	2.61596	2.12344	1.5094	0.985898	2.03161	5.20984	3.83802	5.0433	1.74312	3.05886	2.79023	3.52901	4.21665	1.12531	3.25597	3.08664	3.88798	3.15584	2.8605	2.43052	5.53491
NM_001146322	65983	GRAMD3	GRAM domain containing 3	1.45274	1.12997	1.97278	0.226194	2.9e-05	0.135054	0.002869	0.70953	0.358716	0.6228	1.5e-05	0.645123	6.72606	4.77649	3.57262	5.00317	2.58464	13.5331	1.65797	3.04892	3.41266	6.02913	4.8222	2.86778	17.7269	12.8436	13.0361	6.99081	3.58788	5.23763	0.000166	0.344649	0.45019	0.760454	1.09847	0.924147	0.416015	0.016582	0.818147	1.51954	1.00616	0.547376	7.30754	8.45123	7.28842	4.91576
NM_000826	2891	GRIA2	glutamate receptor, ionotropic, AMPA 2	1.43361	2.19322	2.34107	5.08264	6.68092	5.85265	0.403244	0.676987	0.196628	3.25014	0.011351	1.14673	1.86925	2.22033	2.22739	0.164261	0.978893	0.242372	1.62516	2.89023	0.494969	0.665734	0.025504	1.78448	1.06295	3.11192	0.351374	1.33924	0.971347	0.115501	3.38173	5.82058	2.71284	5.67804	5.97885	6.56587	11.2423	6.72329	5.85264	1.86715	1.27838	1.12692	1.45344	0.003906	0.000845	0.067634
NM_145740	2938	GSTA1	glutathione S-transferase alpha 1	5.16792	5.97611	1.52648	0.079002	0.120189	0	1.88659	2.93775	2.83966	1.00115	2.42916	3.35886	1.64795	1.62764	2.64599	1.67203	2.36656	1.78847	6.60066	3.41962	2.04075	3.58295	4.24447	3.20496	4.83072	0.457761	2.47819	1.50766	5.62398	0.994859	2.48871	2.44789	4.44469	4.06007	1.45308	2.42951	1.22932	1.16526	3.02786	3.43644	5.30276	7.53952	5.49483	3.97703	3.62885	0.564877
NM_000850	2948	GSTM4	glutathione S-transferase mu 4	1.16921	5.73752	4.54587	1.6622	1.7641	2.05922	0.048761	2.35482	3.31799	3.47835	3.7914	1.81031	2.32326	3.8295	5.42114	6.68691	5.54659	4.44649	5.55035	3.57568	4.3652	7.28201	5.82864	4.06528	4.88455	3.71031	4.71607	2.94442	3.78972	2.92503	2.67083	2.33981	2.22759	2.56243	4.0842	2.89996	2.81042	2.00777	3.34996	7.06506	5.69959	5.71926	5.08336	5.10835	7.67741	2.88066
NM_001006636	79712	GTDC1	glycosyltransferase-like domain containing 1	4.48392	4.41282	3.65677	3.78793	3.60707	2.36644	3.1471	2.05918	3.26717	2.25261	2.91189	3.01396	3.04835	2.96413	3.15582	1.89016	1.27238	2.1573	2.5766	2.07969	2.36881	3.19255	3.69836	2.37843	2.01446	1.99209	2.73321	1.79886	0.007522	2.75757	3.4423	2.99839	3.55908	1.92715	1.84875	2.30513	2.70389	2.85792	2.46202	3.05593	1.41075	2.66676	2.10903	1.7488	0.989622	2.50715
NM_001159391	2987	GUK1	guanylate kinase 1	18.7289	59.7835	23.4625	37.7434	32.879	23.9514	26.3615	23.4566	14.0656	26.4402	55.3038	34.5943	20.4183	12.4897	12.4136	56.6946	49.4281	20.8562	29.2548	31.2915	16.4023	29.4762	42.0768	36.5305	44.0864	26.9481	29.1038	57.1979	63.6052	35.5095	23.3345	7.28958	6.76354	39.5518	55.7269	48.8339	24.4577	23.3813	49.5195	63.5666	58.4276	55.025	53.8213	45.7291	74.5799	23.1317
NM_002107	3020	H3F3A	H3 histone, family 3A	5.57116	8.72784	9.55937	8.63463	4.48802	14.9991	0.001529	0.000984	2.95613	17.6687	3.1901	3.01578	13.1521	17.7498	2.88185	9.97896	0.001544	0.00141	5.07716	8.10219	3.23498	0.001466	0.001564	0.001557	0.001495	1.41858	0.001751	6.92141	0.001479	0.001391	3.94537	3.62993	0.001618	11.2701	0.001156	0.001365	5.1801	0.001476	0.001896	3.03213	6.40496	3.01206	8.68367	13.6655	0.001488	0.001444
NM_001282587	9563	H6PD	hexose-6-phosphate dehydrogenase (glucose 1-dehydrogenase)	4.60238	4.41745	3.07285	1.91657	1.59688	0.986965	6.87184	7.1465	7.95259	2.85621	4.17584	2.71252	7.43957	5.36026	5.10858	6.62254	7.86797	6.47355	6.0936	8.43941	5.93135	7.4271	4.97928	5.93155	4.89865	3.51953	2.67725	2.4669	1.4548	2.89762	3.59715	0.000217	2.65116	4.36018	6.396	3.76204	1.94127	0.000701	1.61425	6.41389	5.37737	5.21889	6.93021	6.74268	5.81202	7.81315
NM_004821	9421	HAND1	heart and neural crest derivatives expressed 1	21.6718	4.48965	9.74524	0	0.083659	0	20.1382	16.1565	23.6337	4.51459	4.17342	4.97823	22.5047	25.6432	24.7612	5.49036	7.97866	5.55219	17.9932	15.1871	16.5612	26.1146	16.0635	13.5368	6.43532	1.27439	2.98023	8.19967	5.34277	4.31912	8.29119	3.00298	2.11031	22.3463	19.1761	11.8328	0.419545	0.041654	0.609291	11.6344	16.8016	20.0444	14.2781	15.4137	16.8272	54.3518
NM_021973	9464	HAND2	heart and neural crest derivatives expressed 2	24.1635	8.54143	10.3093	0.0981	0.219144	0	21.9578	17.8284	26.7811	5.22063	3.65965	4.99327	33.8493	33.9409	30.5625	6.2429	9.11441	7.23416	24.5538	20.5369	19.1157	22.9098	12.0606	13.6023	8.98943	1.58119	4.97302	7.00304	4.53942	3.9951	5.50334	1.8887	1.63973	22.1216	19.2752	12.5332	1.06021	0.476578	1.12041	6.71232	13.1734	13.6114	16.2282	24.2146	21.9597	55.7329
NM_000558	3039	HBA1	hemoglobin, alpha 1	0.184792	0	42.7217	17.9219	38.9049	13.4544	0	0	0.195376	0.064866	0.138729	0.196565	37.9376	19.0968	18.4239	0.294131	0.078568	0	0	0	0	0	0	0	0	0.238227	0	0	0	0.139534	0.260476	0.159481	0.728857	0	0.17619	0.286412	0.172372	0.293267	0.076568	0.132069	0.141549	0.06556	0	0.05978	0	0.07313
NM_000517	3040	HBA2	hemoglobin, alpha 2	0.061737	0	53.1827	20.3183	45.2431	15.2531	0.155625	0	0.326364	0.065012	0.139039	0.065668	46.492	21.6627	23.1941	0.147396	0.078743	0	0	0	0	0	0	0	0	0.119382	0.152268	0	0	0.139846	0.261067	0.159842	0.892821	0	0.176586	0.14353	0.403112	0.293922	0.076739	0.132365	0	0.065707	0	0.059913	0	0.073294
NM_000518	3043	HBB	hemoglobin, beta	0.117856	0	46.2779	18.1757	48.3082	19.8958	0	0	0	0	0	0	39.5998	18.4998	24.8812	0	0	0	0	0	0	0	0	0	0	0	0	0	0	0	0	0.152585	0.46511	0	0	0	0	0	0	0	0	0	0	0	0	0
NM_013332	29923	HILPDA	hypoxia inducible lipid droplet-associated	6.15177	32.202	15.0208	26.2684	24.7554	20.4474	6.0156	3.40474	5.30376	13.2381	14.1057	11.742	12.1968	16.2737	14.7567	12.0695	10.6565	8.54653	9.78353	7.90523	8.29739	13.2207	10.2262	12.8706	12.7207	12.4042	14.7788	11.8896	12.0347	10.7822	15.3809	16.9553	9.60342	14.1833	9.59459	10.7901	12.3326	12.7902	15.5134	16.6292	20.074	13.6577	23.0973	15.4955	27.0023	4.80513
NM_001278163	10114	HIPK3	homeodomain interacting protein kinase 3	11.9087	11.2558	12.322	16.3648	10.8622	9.11513	10.1436	12.9375	11.7812	6.44651	4.66098	9.61239	11.3487	4.43478	7.16065	2.1305	2.3594	11.1323	7.54322	8.20209	5.17245	12.2453	12.7946	16.0196	9.66773	8.20491	10.4799	5.59532	4.15828	4.40005	3.4487	9.64916	10.5352	11.098	8.61272	7.43217	9.71431	6.07865	10.4267	8.23118	10.9995	8.91215	11.2074	11.3047	8.00774	13.0379
NM_005325	3024	HIST1H1A	histone cluster 1, H1a	3.35245	0	4.61544	0.070132	0	0	3.67655	2.02582	2.05296	0	0.099796	0.188456	7.39649	7.39477	7.20985	0.528247	0.565073	2.38886	0.402321	1.29078	1.22338	22.4082	15.9985	15.0176	0	0	0	0	0.10542	0	1.99051	0.571419	9.31383	4.86619	8.26507	4.72062	0.246974	0.422084	0.11022	0.2848	0.101562	0.188459	0.091103	0.1722	0.640225	0.105132
NM_003531	8352	HIST1H3C	histone cluster 1, H3c	136.101	179.645	109.643	10.1287	5.91836	10.3627	229.902	175.153	203.303	4.25394	15.475	5.65625	42.6175	63.0053	64.4582	0.657738	0.701373	0.648435	3.86433	4.67408	4.68169	109.823	87.6551	77.782	39.5228	21.1966	29.5673	0	0	0.207451	1.56067	0	2.65335	4.18358	6.66041	3.43081	0.172115	0.217949	0.227535	0.393388	0.42297	0.781435	30.8595	33.1921	21.9929	0.871349
NM_003532	8353	HIST1H3E	histone cluster 1, H3e	1.82808	0.188422	1.07025	120.612	86.2775	121.815	180.295	142.306	169.389	129.226	188.776	102.16	175.114	235.113	256.366	21.9244	25.6951	20.1152	171.154	165.511	181.389	207.547	200.757	173.52	24.9838	22.0426	31.9592	0	0.857984	0.410823	99.3938	110.383	96.0099	88.4476	91.2775	55.6153	165.615	157.324	212.46	44.7924	40.1999	35.3968	131.541	158.711	130.666	79.5874
NR_002944	664709	HNRNPA1P10	heterogeneous nuclear ribonucleoprotein A1 pseudogene 10	63.4698	95.9839	139.877	32.0299	27.8355	49.7623	54.6587	57.0571	70.9818	20.6595	5.9e-05	39.0191	133.409	136.931	137.572	0.000101	1.61817	23.9751	65.0048	64.5529	34.9467	118.25	35.1777	84.9436	33.1309	20.9241	24.4541	18.2373	11.3541	6.00816	106.518	132.822	84.312	49.0205	60.2346	16.8327	90.689	97.6893	93.3	32.7276	63.1125	42.7291	82.3846	87.28	58.5416	133.44
NR_038367	100506311	HOTAIRM1	HOXA transcript antisense RNA, myeloid-specific 1	3.24315	1.7888	1.38884	1.7297	1.59975	1.71827	0	0.38173	0.575229	1.26344	2.15408	1.18693	2.59647	1.44293	1.95366	11.9449	6.53371	4.36941	5.06952	3.67752	3.51691	4.82024	6.19739	3.48458	8.88244	7.10722	7.50708	3.3259	4.32132	2.00066	0.745947	0.992492	0.470224	1.83008	1.61806	0.93266	8e-06	0.106536	0.290001	20.3539	13.5847	13.264	2.28945	2.68619	3.60943	1.25706
NM_006735	3199	HOXA2	homeobox A2	3.97746	1.65969	1.6001	2.9742	3.39949	2.67454	0.128086	0.19384	0.356781	2.21941	1.92	1.44934	0.712099	1.08569	1.8119	5.59805	4.91246	4.33982	2.33966	1.51399	2.02863	4.00624	4.38338	3.75372	5.7777	6.44315	4.38114	1.59117	2.40204	1.66183	1.8074	2.49148	1.29755	0	0	0.235504	0.251783	0.162505	0.212236	6.42147	4.94299	7.45764	1.05233	1.55978	1.23401	0.36363
NM_019102	3202	HOXA5	homeobox A5	15.0498	3.58742	4.51535	0.753142	0.470354	0.656987	0	0.239471	0.192847	2.1279	1.24496	1.52719	0.804966	0.391256	0.828753	0.394592	0.234908	1.89357	10.4162	6.43986	8.64522	13.2565	12.8973	21.4016	35.7563	45.1473	45.2499	14.6137	6.86236	2.79824	3.13647	5.0559	0.628633	0.443499	0.45464	0.127292	0.544376	0.087806	0.04587	62.0265	41.902	64.9106	7.84672	9.21641	3.64479	0.654993
NM_002145	3212	HOXB2	homeobox B2	11.3881	2.69403	3.81223	2.97746	2.65523	3.23973	4.83912	4.19551	5.60622	3.1328	1.98161	2.47966	6.10528	7.92159	8.44834	11.3788	10.0956	5.27207	8.63768	6.05811	6.87403	10.0009	9.78535	12.0519	11.098	13.3973	8.69492	5.21277	5.38788	4.24874	3.57673	3.72841	4.06612	4.50173	4.32048	2.11454	0.706495	0.319019	1.14277	16.865	15.7673	18.0748	4.64323	4.87651	5.02912	8.61273
NM_024015	3214	HOXB4	homeobox B4	10.9443	2.31867	2.7288	0.601581	0.587232	0.420071	2.28643	2.46332	3.11188	2.87602	1.09492	1.62789	3.52073	3.84355	3.64053	2.83857	3.04249	3.09517	7.86965	5.99738	6.73848	8.68601	8.40062	10.4389	13.6118	18.7001	13.5416	5.93528	4.68004	3.50635	2.09478	1.8874	0.889085	2.28463	1.70496	1.62705	0.434863	0.070209	0.220073	18.8186	16.0021	17.2644	3.63722	4.67467	4.33671	5.96902
NM_153633	3221	HOXC4	homeobox C4	9.23177	1.84318	1.76329	0.604602	0.102993	0.620405	1.17604	1.05169	1.69301	0.560796	0.465809	0.880768	1.98323	2.25567	1.68505	1.17668	1.30763	1.36889	5.37974	5.25272	4.21243	4.95364	6.97562	7.54086	10.096	11.773	8.45198	2.50048	2.17286	2.27043	1.07838	1.36208	0.36694	0.826679	1.07766	0.295181	0.203606	0.043632	0.091187	12.8541	11.8082	14.9339	2.59511	3.21488	1.83028	3.09307
NM_018953	3222	HOXC5	homeobox C5	6.53769	2.4387	0.911847	0.059735	0	0	1.03684	0.925862	0.59593	0.767333	0.234439	0.652389	1.13664	0.731067	1.32648	0.387472	0.266306	0.476266	4.09789	1.83053	2.48741	3.9452	3.18074	4.6617	10.8737	13.9609	10.4185	4.66397	3.33032	2.19587	2.17363	1.35015	0.648097	0.362736	0.1847	0.284946	0.154323	1e-06	0	16.7896	13.0275	15.0453	3.04815	3.40084	1.7333	0.54036
NM_001258357	3241	HPCAL1	hippocalcin-like 1	6.10105	8.66946	3.72101	20.8899	18.2703	18.6593	5.34169	4.78229	5.47739	9.28918	8.15353	8.16801	6.69798	1.38138	9.51459	12.3753	10.6801	4.94523	8.31008	10.5731	9.51538	10.0573	12.9348	5.9821	10.6668	13.2666	10.0822	9.13134	7.83032	9.17886	11.065	5.04162	5.03209	10.1442	10.517	11.2873	8.09167	11.6522	9.39323	16.1422	16.6855	14.0976	9.70914	7.16142	5.53565	5.61842
NM_147175	90161	HS6ST2	heparan sulfate 6-O-sulfotransferase 2	6.02969	1.29797	3.26758	0.000211	0.000299	0.001783	6.07126	6.32223	6.32747	1.4042	1.70436	2.20523	7.08283	5.21449	3.4572	1.24013	0.842651	3.99508	5.06632	3.40392	4.41936	6.89923	0.983969	4.42061	4.20115	4.1258	5.36864	1.44759	0.691631	0.019775	9.33799	10.8119	9.18972	12.6258	11.4434	7.77093	4.37193	3.24562	0.566888	4.63649	5.34181	8.90587	6.76475	8.48648	6.79731	17.1409
NM_002155	3310	HSPA6	heat shock 70kDa protein 6 (HSP70B')	6.72753	1.36504	1.12361	1.03146	0.980632	1.08505	12.9823	5.93252	13.0273	1.43627	2.27646	1.15172	0.650411	0.67872	0.896967	0.522608	0.933724	0.366285	2.6387	2.98238	4.88443	1.74987	3.05816	2.74871	4.86716	6.40171	7.64855	1.90269	5.08001	2.82256	2.70006	3.01746	1.66914	4.17365	4.15997	6.26146	18.1751	21.0697	21.176	1.11037	1.47992	0.58638	0.723381	0.867859	1.21205	0.40656
NM_144617	126393	HSPB6	heat shock protein, alpha-crystallin-related, B6	5.96138	1.36216	3.4046	0.066744	0.135436	0.189139	2.23237	2.65495	2.44373	0.400943	0.191099	0.135252	1.12939	1.62286	1.47568	1.76699	2.05538	0.446071	2.41504	1.22957	1.45731	0.661622	1.13371	0.751455	0.620558	0.407215	0.366816	0	0.404988	0.240397	0.296164	0.326587	0.445414	1.4185	1.81231	1.27082	0.548731	0.404321	0.52803	0.862622	0.969061	0.585661	2.09458	2.0639	2.60923	3.8713
NM_000868	3358	HTR2C	5-hydroxytryptamine (serotonin) receptor 2C, G protein-coupled	3.3823	1.77799	13.3141	3.78681	1.724	2.79754	5.21863	5.24599	2.7022	0.374822	0.26577	0.843269	24.6891	16.9324	19.7662	38.9481	30.0301	74.2714	25.7925	25.0129	21.3534	28.4932	26.3799	16.8109	81.6312	83.0712	95.6989	25.1817	31.1444	31.975	11.7443	9.17216	21.8163	1.07826	1.97759	1.14797	4.92502	3.86901	3.59201	15.5189	11.4097	5.94571	45.683	45.49	40.6842	7.48069
NM_001039613	285148	IAH1	isoamyl acetate-hydrolyzing esterase 1 homolog (S. cerevisiae)	17.9706	17.2905	16.7802	4.89787	5.19836	4.2192	24.3813	22.3275	24.7541	16.5299	18.954	18.9135	11.3692	8.58949	9.02771	0.175913	0	0.172863	14.6563	16.1738	12.2108	15.0042	14.1759	11.578	9.178	7.6744	10.7532	20.6153	15.2952	13.3829	12.0004	13.021	12.9913	16.899	24.2886	22.0193	13.0753	12.3959	17.357	10.4353	12.3383	12.0831	17.6856	17.6519	20.8098	21.0113
NM_001099789	3384	ICAM2	intercellular adhesion molecule 2	4.75451	3.17194	2.51848	0.311519	0.270735	0.251936	0.591823	0.849217	0.000165	0	1.46263	0	2.385	2.58552	3.89719	10.4219	7.92033	2.3304	1.62556	0.101321	1.82935	2.9163	2.29888	0.208529	4.19885	4.2409	4.25374	2.97309	3.30163	3.00761	1.50051	0.580525	1.55682	0	0.000117	0.954666	0.731631	0.807164	1.26485	0.72967	0.943225	0	1.86322	3.46	3.8799	2.8786
NR_024629	55853	IDI2-AS1	IDI2 antisense RNA 1	3.01394	4.25277	2.67462	3.12679	3.62407	2.89291	4.06786	2.58859	2.95079	2.57307	1.27515	3.51374	2.61028	2.53542	2.23134	0.891461	0.000677	2.27557	2.80593	4.81478	3.88606	2.33742	2.01429	3.27818	2.80808	3.04869	4.26602	2.99845	2.57213	2.84854	3.42952	4.55824	4.82774	5.39388	4.31257	3.82794	6.86995	5.55543	5.64259	2.23575	2.38976	2.90757	1.18948	1.95952	1.74538	1.366
NM_001135113	147920	IGFL2	IGF-like family member 2	8.14972	1.81499	0.848627	0	0	0	0.580163	1.99234	0.86536	5.68463	1.39903	1.59107	6.5837	14.3429	6.31813	2.6625	6.0736	3.49392	8.6815	3.13859	3.8528	27.8328	9.26859	4.5676	4.09027	0.87091	3.14199	7.26995	3.32801	4.4085	0.928532	1.01662	0.319645	3.13691	3.53299	3.25325	1.83029	0	2.80648	2.66866	11.8192	8.21289	11.7785	16.9637	14.7712	10.3085
NM_001142784	3590	IL11RA	interleukin 11 receptor, alpha	12.2088	12.4318	10.386	2.57071	5.01088	3.4903	13.6408	17.0408	18.5254	11.5754	9.15201	8.18295	14.2963	14.5067	22.4561	18.9443	17.0605	4.10604	15.369	13.0749	11.9117	16.9901	19.5473	8.8237	7.10674	7.0217	5.50732	11.3297	6.04895	8.82645	7.97546	5.00865	5.76492	7.28311	8.01018	6.93607	2.78828	4.37091	0.004967	3.54391	15.1665	10.456	6.93529	8.48478	6.66828	15.8791
NM_020238	3619	INCENP	inner centromere protein antigens 135/155kDa	2.64227	6.49078	4.67412	2.81069	2.84324	2.75839	5.72212	4.33057	5.17982	2.9781	3.229	3.69052	2.27831	2.85662	1.91918	2.21919	2.48703	3.84884	4.52423	3.23231	2.15763	4.09132	3.15302	0.013166	2.05337	2.16925	2.05967	2.66362	1.92684	1.6996	2.34443	1.44788	3.37537	1.73058	4.08305	1.3323	2.65883	3.42856	1.07965	3.01878	1.6986	2.43343	2.66315	1.63018	2.98922	3.47976
NM_018250	55756	INTS9	integrator complex subunit 9	2.8685	3.4415	3.41776	2.76838	3.08938	3.14166	2.63782	2.82419	1.1116	3.39375	4.11037	0.853803	3.03794	3.45796	1.53006	3.0886	2.73005	3.94888	2.02397	1.13205	1.71378	3.77565	2.10107	2.08684	1.60596	2.32815	2.6139	2.57456	3.19095	2.14419	4.89253	2.39829	0.037487	2.17807	4.01603	4.28411	1.98102	2.86826	2.3202	4.14192	2.1501	4.46323	2.67305	4.11563	3.55346	1.717
NM_016291	51447	IP6K2	inositol hexakisphosphate kinase 2	20.2675	17.784	15.9009	16.9952	17.2543	8.39974	9.63893	11.2738	10.5577	11.4888	10.6721	7.64395	20.2857	11.8575	20.8808	6.0783	5.84078	6.59549	7.05217	11.1414	9.47716	9.83348	11.9408	19.4355	16.4573	6.63455	14.1259	6.7422	6.77139	14.9001	8.38731	10.7948	9.07694	9.09702	1.71188	12.0383	15.7053	12.1831	14.9944	9.77712	11.9783	10.5703	14.1887	11.7223	13.4418	10.5239
NM_001134435	84223	IQCG	IQ motif containing G	7.36634	2.85825	13.3918	1.36167	1.17048	0.424413	0.468391	2.16987	0.979906	2.07909	0.833841	1.80605	15.1808	11.8626	11.9415	5.62628	7.02424	5.50648	5.14641	5.77191	4.81815	11.8188	11.8094	4.98013	13.4914	10.6565	11.7423	4.51823	4.81943	5.53496	2.40547	2.88731	3.42367	1.625	1.17491	0.845176	1.8027	1.8834	2.20369	3.53947	3.2207	3.08382	11.7099	13.3562	10.8955	5.5602
NM_001569	3654	IRAK1	interleukin-1 receptor-associated kinase 1	7.61536	10.5559	9.1932	1.12819	1.17278	0.62148	7.34917	4.56293	5.70452	2.03536	3.84629	1.23373	7.57904	8.28388	7.76349	5.67689	5.86425	2.41725	7.05832	6.04815	6.52159	10.7835	7.49967	2.96126	1.66021	2.74458	1.68295	4.65672	8.24339	6.60105	2.25291	0.012151	0.915905	7.31957	9.33206	6.883	4.26011	5.4952	6.06424	4.94272	6.098	6.32448	6.09225	7.14921	8.74248	7.57689
NM_024337	79192	IRX1	iroquois homeobox 1	5.39531	9.6913	1.7474	12.5602	9.95061	11.6421	1.22046	1.26646	1.25775	17.4648	18.5164	17.2297	8.54153	11.2833	10.4572	8.07887	10.6055	5.00777	5.3384	3.95124	3.64275	2.72663	3.30876	3.04267	3.36693	2.52422	2.40875	7.26311	11.2524	8.58127	8.47428	4.33124	1.57756	1.56411	1.5724	1.08453	2.93869	4.80076	5.21822	0.52152	0.185429	0.482965	1.16998	1.58136	1.76403	3.77312
NM_005101	9636	ISG15	ISG15 ubiquitin-like modifier	6.61573	14.3113	10.3549	2.50026	2.09289	3.30488	7.93484	7.64417	7.68405	22.1874	24.5949	6.81821	4.08141	5.71268	8.08011	10.5009	11.5026	4.46343	27.8806	31.3004	40.4576	22.5398	13.8086	7.55628	10.4624	6.92488	9.78513	9.95921	12.9086	12.4316	9.93852	8.56674	10.711	5.24207	6.00419	4.79207	11.2312	10.219	15.5365	8.268	14.0926	9.71063	58.7426	46.1046	50.5981	3.482
NM_020851	57611	ISLR2	immunoglobulin superfamily containing leucine-rich repeat 2	0.651327	2.70301	2.9725	12.4271	12.3244	15.808	6.47042	5.39326	5.28727	1.21901	3.44106	2.80298	2.03458	1.29632	3.52168	1.52611	2.72567	0.85912	5.53245	6.14792	8.50665	3.1648	3.82754	2.20989	0.873572	1.99856	1.06264	2.63841	2.99844	0.000162	8.01182	5.59108	12.3318	9.4383	6.79919	9.13356	11.1542	12.4628	9.27338	1.89361	2.47713	1.63095	3.6734	3.81551	5.96131	0.000168
NM_001136201	79763	ISOC2	isochorismatase domain containing 2	9.67967	14.9552	12.0339	8.14105	7.22466	9.91903	5.21924	5.2434	7.17791	8.40596	11.2569	7.04104	11.844	15.388	17.1607	15.0103	15.2447	4.00808	17.9729	14.6461	17.8547	15.6022	17.2396	6.94766	10.2825	9.84553	9.9813	19.4245	23.9932	16.9669	13.0148	10.4182	12.5165	12.18	14.5477	12.5324	11.5267	14.7187	21.5594	18.82	21.1196	18.0481	18.158	20.6834	18.983	13.5922
NM_000888	3694	ITGB6	integrin, beta 6	1.18272	0	0.900999	0	0	0	0.631276	1.26419	0.755097	0.754373	0.723658	7e-06	2.2117	2.41275	1.88855	0.00023	2.7e-05	1.58377	1.61528	0.675083	1.12194	1.78468	1.39555	2.01128	0.701932	0	0	0.424122	0.372224	0	9.8e-05	0.402137	0	2.21169	2.35075	1.08778	0	0	0	0.852659	2.80355	3.31194	0.022671	2.20774	1.72036	4.54637
NM_001135048	122953	JDP2	Jun dimerization protein 2	2.33662	1.42603	2.19786	1.12683	3.41251	1.28267	2.50936	2.53486	2.00515	1.83013	1.53958	1.45998	2.25826	4.11116	3.56743	0.004459	1.50097	2.46878	2.43746	0.764974	1.51553	4.26987	1.87052	0.437493	1.31122	1.39135	1.25306	1.54289	1.66295	0.638053	2.50176	0.000287	0.51069	1.73906	1.30661	1.19359	0.362674	1.46006	0.313828	1.68624	2.15372	2.90678	2.19771	2.02511	2.83417	2.79758
NM_001115016	55683	KANSL3	KAT8 regulatory NSL complex subunit 3	6.82941	6.02982	6.02656	0.000185	1.24053	0.427863	3.32447	3.11079	5.03532	3.08027	2.35618	2.26618	4.10407	5.19679	3.21735	3.42112	1.87534	4.51907	2.6908	3.87279	1.72381	3.81927	2.10791	1.49523	2.91912	3.20002	3.01316	2.77667	1.8669	2.34293	2.76668	2.06344	4.57185	1.24579	2.42972	0.003685	2.08336	2.99829	2.3019	1.74481	4.22682	1.88498	3.83797	3.93579	3.78371	5.0304
NM_001014380	84056	KATNAL1	katanin p60 subunit A-like 1	3.85419	5.61419	2.26168	3.55061	3.72269	4.63208	2.62246	1.76959	2.38361	2.28704	1.74443	4.19283	0.656925	2.18591	0.9519	0.987307	0.674598	0.905952	2.30564	4.10577	1.89263	4.66589	3.8759	4.43992	3.09311	2.93737	2.73035	1.37787	0.971927	0.004169	2.17341	3.46881	2.46237	1.66409	2.20403	2.57359	3.60326	2.07597	3.16429	3.25597	2.32699	3.19867	2.20382	2.26918	2.25913	0.916407
NM_002242	3769	KCNJ13	potassium inwardly-rectifying channel, subfamily J, member 13	3.73309	1.65373	8.99075	1.09194	0.425968	0.658368	1.24548	2.24434	1.72327	0.87342	0.423924	1.07154	13.5442	10.3319	9.74977	6.15816	5.51721	20.9332	3.76028	4.37502	3.15042	6.43247	6.93786	3.58541	22.491	15.8521	25.8259	9.93971	8.81319	10.0774	2.69183	1.99606	3.89912	1.1685	0.471213	0.48267	1.31232	0.50604	1.09644	1.78502	1.54357	1.3736	11.3348	14.7439	10.3123	7.08259
NM_001129995	79047	KCTD15	potassium channel tetramerization domain containing 15	4.89997	6.36505	4.10952	6.44951	6.06942	8.17789	6.58856	4.38251	0.038914	3.96129	4.74375	4.25561	7.37004	9.83531	8.65241	7.89209	5.47903	7.5658	11.3505	7.79686	5.83735	3.19268	3.34899	6.40928	3.72562	3.81165	6.10648	3.09318	5.80159	5.64716	6.79279	3.16898	7.2453	7.22677	7.35469	7.48736	0.139059	5.7023	5.7061	7.05335	6.54005	5.97851	5.37498	7.28495	4.96656	2.94046
NM_002253	3791	KDR	kinase insert domain receptor (a type III receptor tyrosine kinase)	32.8871	9.11683	25.1284	0.205499	0.104407	0.275264	45.6011	40.5127	43.2963	3.97048	2.04705	4.71797	34.1951	25.2277	23.5379	5.47896	5.88847	10.9001	18.7987	16.4966	15.0455	25.4493	15.0219	18.4405	6.31651	2.89645	4.20401	4.34474	2.94713	4.42919	5.14756	5.19856	3.95673	20.6071	24.2047	11.4339	0.629484	0.614157	1.17851	8.18663	13.3976	14.0465	19.1869	17.1302	15.0681	92.0088
NM_001290257	23351	KHNYN	protein KHNYN isoform 1	5.76932	9.84281	8.00907	2.98913	3.32199	2.3293	14.3836	12.676	15.4714	5.137	1.89034	6.05833	10.386	2.52389	6.94609	5.56525	5.55734	7.66632	7.30994	8.06358	0.578831	9.09582	3.73057	6.01595	9.54018	8.00693	9.15104	2.67848	3.62831	1.89017	5.88962	3.10153	1.21126	6.6472	6.04166	6.07194	2.76357	3.61582	1.92162	4.63419	4.57113	6.13265	7.42415	8.31506	6.11257	10.7049
NM_014647	9665	KIAA0430	KIAA0430	4.46046	2.53771	5.33402	3.14164	2.9063	3.40962	3.17549	3.99903	3.65799	2.78586	1.7449	3.18786	2.71921	3.40067	4.26786	1.68748	1.40671	0.062196	2.50175	2.99544	3.06426	4.00483	3.61192	3.94716	1.89091	2.56164	1.70311	1.23952	1.17693	2.39366	3.44536	4.16144	5.19806	3.13598	3.00675	2.1266	3.15463	3.1454	2.52499	2.91962	2.46768	2.83092	2.58223	2.81669	2.61066	3.46253
NM_020829	57589	KIAA1432	KIAA1432	3.54993	4.13541	5.0053	2.7232	2.59619	2.72632	3.51889	3.33347	4.41047	2.91271	2.57747	2.42788	3.41192	2.91556	3.97169	0.330281	0.011643	3.20484	2.49726	3.94238	2.93402	2.66767	3.33927	4.6062	3.26458	2.36113	2.98418	1.68062	2.09535	1.14103	2.35038	3.34469	2.79353	2.15427	3.20303	2.00558	1.68204	0.96354	1.86162	3.51643	3.15567	2.1294	3.70869	4.49361	3.13829	6.09246
NM_001198972	57648	KIAA1522	KIAA1522	3.82689	1.79059	4.43586	1.82605	2.2188	2.38789	6.00014	6.3529	6.57201	3.02086	0.069076	2.58845	2.94879	7.17649	7.99949	3.5168	9.56344	4.45262	7.407	6.32895	5.65769	3.2908	3.92671	5.24925	3.00851	2.588	4.56947	1.58579	0.448809	4.60766	3.17242	2.61383	1.28843	2.25901	2.23418	2.32072	2.05463	2.87348	1.81155	2.2862	4.18888	2.84264	4.5446	2.91745	6.29408	7.26014
NM_020931	57691	KIAA1586	KIAA1586	7.27275	6.88884	6.49781	8.25764	6.35031	5.84933	4.78994	5.65382	4.56911	4.12937	5.19563	7.20763	6.03758	3.87536	4.50927	2.84422	2.2313	3.53439	5.31627	5.14466	4.88139	3.39716	3.3378	6.97205	3.84465	2.68647	4.33805	0.003102	2.63947	3.0829	5.80347	8.67763	7.27161	6.0076	6.19069	7.59335	6.47245	3.82497	4.76526	5.36505	5.87683	6.22032	5.5433	4.66821	4.61775	4.81385
NM_006845	11004	KIF2C	kinesin family member 2C	10.1723	16.8248	12.5556	1.43324	1.46747	1.20552	7.3238	6.87766	6.75938	6.40481	6.19381	4.67886	4.36284	5.56793	5.44389	1.42372	0.813876	3.74027	5.34282	5.80381	5.95527	6.94196	4.91081	5.18334	2.99355	2.54673	2.18623	3.78316	0.000109	3.50706	9.83494	9.31065	10.4382	4.60179	5.20508	4.35483	7.20569	6.3001	4.37815	4.3719	3.67149	5.0318	3.66269	4.51653	3.50585	5.4094
NM_001134776	64837	KLC2	kinesin light chain 2	0.322818	5.16348	2.96118	1.90391	7.51949	2.91533	5.28022	4.82738	4.00279	7.05548	5.34111	2.94692	3.42971	3.14892	4.14831	6.68963	9.16463	5.21722	7.76382	6.95948	6.6048	3.35243	4.57222	4.51343	5.35748	5.63536	4.50834	4.3414	6.04498	5.29877	1.75466	1.74131	5.78154	6.61854	5.74535	6.21634	7.7965	7.12656	4.32258	6.5656	3.61387	2.36021	2.19698	1.91504	4.34672	2.80317
NM_006063	10324	KLHL41	kelch-like family member 41	3.40579	0.248054	6.102	1.56047	0.725471	0.448199	0.509571	0.408166	0.625936	4.24892	1.0522	0.509084	8.53405	0.304668	0.391134	0.427345	0.488672	2.62767	6.89241	1.77858	1.75242	0.401781	1.73841	0.424439	1.28499	1.07904	1.15453	0.618213	0.973203	0.353015	2.40318	5.30693	0.56572	0.576441	1.40868	0.385648	1.72271	0.999135	1.16328	0.563832	2.4046	1.11883	0.320425	0.256565	0.954028	0.368946
NM_000422	3872	KRT17	keratin 17	1.04182	0.323215	1.74298	0.092019	0	0.069555	0.293171	0.316945	0.204198	0.245755	0.483231	0.290178	2.92811	7.25044	4.74692	3.20273	1.64126	1.00241	1.76182	1.61994	1.33957	3.41534	1.4397	0.839076	3.04331	0.823524	0.819202	2.3465	2.32801	2.82951	0.653328	0.100064	0.46073	1.87806	0.999694	1.03333	1.04476	0.650644	1.65091	0.834887	1.29173	0.745584	2.00634	2.42945	2.25838	2.54248
NM_000224	3875	KRT18	keratin 18	56.8562	19.4548	39.7851	0.000242	1.17805	1.07652	69.7454	63.7896	71.1787	22.5193	11.0232	11.3218	69.6614	98.9652	83.1617	50.03	64.8295	37.6203	80.0852	60.5038	66.8748	70.0387	40.9908	36.3271	30.9573	14.2102	26.1543	39.5103	26.4694	20.0339	30.6982	17.5393	29.0678	74.8023	96.6691	67.7738	7.68566	5.70978	7.00929	44.1916	61.8834	79.2226	48.542	78.3216	67.1172	161.921
NM_001278116	3897	L1CAM	L1 cell adhesion molecule	2.83541	11.6051	0.038654	20.3198	18.3597	30.1521	7.17307	5.84691	4.87273	17.4829	18.9666	4.50882	10.1265	6.41447	14.6369	12.2609	12.769	9.88006	9.49428	6.88938	15.3586	0.040568	5.14982	0.04304	0.041449	6.23305	12.6922	14.692	18.733	18.6428	12.6626	10.9048	18.2168	13.8465	10.6325	11.437	17.2265	11.1997	0.042354	17.7779	0.038597	5.67933	5.51625	4.98293	0.010724	1.31608
NM_006762	7805	LAPTM5	lysosomal protein transmembrane 5	10.5864	2.03313	3.18384	0.18747	0.211494	0.118207	0.498078	0.344519	0.748947	3.31394	2.89849	2.73471	2.48992	3.03808	3.06062	0.410243	0.372103	0.309662	3.59051	2.17516	1.7594	7.85261	4.01948	4.8351	0.194073	0.0763	0.262286	0.749793	0.665635	0.390978	0.850511	0.577746	0.208868	1.88	2.66781	1.95314	0.122345	0.094849	0.297311	1.75999	2.17943	4.02759	5.65077	3.25468	4.38629	7.5758
NM_001286679	55323	LARP6	La ribonucleoprotein domain family, member 6	3.26991	7.60967	5.08988	7.06639	7.84891	2.98187	11.0665	10.7638	8.14421	5.07529	5.40527	4.04253	4.61587	3.46516	2.44766	5.52101	6.97616	5.03726	5.24995	5.3273	3.37523	7.01075	6.38582	4.13605	3.84672	6.19843	6.21207	6.49228	3.66285	2.2894	3.74342	1.74724	0.07983	2.52559	7.19005	7.00601	3.66541	3.92916	1.03163	6.35974	6.56905	7.2995	9.84522	8.95445	8.0549	7.4871
NM_001002257	253558	LCLAT1	lysocardiolipin acyltransferase 1	3.38545	3.51683	3.79095	3.40471	2.53085	3.27761	3.50436	4.76046	5.98673	1.25322	2.20637	2.21651	5.23547	3.50809	3.2204	0.087231	0.877611	2.87753	3.34405	3.08423	2.76524	3.24619	2.76735	4.50839	2.41706	1.52617	2.76516	1.37597	0.294827	0.816056	3.46255	3.68377	2.65643	3.77726	3.43056	2.76007	3.06081	1.04193	3.85331	1.7172	2.56122	3.58393	2.94778	1.84791	3.89093	7.97448
NM_203347	389812	LCN15	lipocalin 15	0.728224	5.21191	2.85793	0	0	0	0.344807	0.074645	0	1.15379	0.926392	0.680347	2.28115	1.85866	4.14347	0	0.233136	0.214297	1.74336	0.532701	0.315545	5.5042	1.162	2.31181	1.44832	2.02686	0.563979	1.45376	1.08713	0.931977	0.256717	0.353736	0.240179	0.122428	0.174002	0.5294	0.509641	0.326502	1.36414	0.146884	0.314326	0.583191	2.25513	4.52869	1.98085	0.325328
NM_005566	3939	LDHA	lactate dehydrogenase A	183.91	203.888	181.144	81.7973	71.2101	61.1603	60.5051	69.1032	60.083	56.2213	40.8496	66.0549	160.672	123.798	153.827	34.2557	21.9213	46.0531	64.8968	45.059	45.3013	108.638	84.1391	107.759	33.2985	16.7473	24.0124	25.7138	28.7106	28.0824	6.56714	11.532	26.7127	77.7966	74.7802	40.0756	68.8441	63.5139	80.7335	74.7901	97.3904	95.2032	98.7222	105.658	116.637	84.6376
NM_015416	25875	LETMD1	LETM1 domain containing 1	6.59964	1.75677	3.74651	6.46461	7.57864	8.14911	2.28803	5.71781	4.44947	5.16212	3.57857	4.62176	6.88769	3.82259	3.50351	0.000741	2.12999	0.047	3.18121	8.08813	5.13385	6.45839	0.004897	6.30026	6.51908	3.07797	0.074208	3.02895	2.42849	0.007834	5.95373	4.03523	4.1016	6.0692	1.88394	2.79709	5.97873	4.77705	0.426818	3.99081	4.78302	7.39158	5.01468	0.763816	1.43912	5.8526
NM_002304	3955	LFNG	LFNG O-fucosylpeptide 3-beta-N-acetylglucosaminyltransferase	5.71235	7.63366	4.44033	4.66902	5.46159	5.65484	3.66671	4.60137	3.91416	9.78595	6.69611	6.84195	3.70984	3.21853	3.74777	3.75517	4.10812	0.414389	2.79297	3.76054	3.57709	2.12187	4.08713	3.20593	2.76321	2.76971	3.42585	1.84644	3.08327	8.99907	11.0122	6.67274	7.18056	3.98694	3.33865	4.70346	5.16082	3.76616	4.93213	4.63297	2.95165	4.35609	2.70886	2.58206	3.15262	0.551447
NM_006498	3957	LGALS2	lectin, galactoside-binding, soluble, 2	4.63852	3.55979	2.4467	0	0.240164	0	4.33142	2.81687	1.58149	1.41464	0.335855	0.634695	1.44768	1.28765	1.85895	0.356399	2.09259	0.175505	4.22408	2.91543	3.62471	3.9695	3.5977	2.0732	0.908703	0.433565	0.735257	0.908832	1.06007	0.675491	0	0.968008	0.588512	0.600241	1.42383	1.04309	1.53479	1.24212	2.03817	0.959742	2.57512	3.1767	1.37875	2.74754	0.537568	2.48009
NM_020204	56956	LHX9	LIM homeobox 9	5.29633	22.0496	5.15393	3.44023	3.0503	3.3063	2.62421	2.4717	3.01266	6.34035	6.43294	6.84604	10.1878	9.12038	6.4627	4.95887	4.04515	5.65749	3.09942	2.04434	2.51793	3.02775	4.41167	2.68071	1.54678	1.20135	1.33283	6.48658	9.10944	10.4675	7.36468	6.48061	2.02086	1.67921	1.90705	2.39839	2.14121	1.68173	1.40341	4.83544	4.44359	7.1359	1.80561	2.08987	3.1167	0.832961
NM_002310	3977	LIFR	leukemia inhibitory factor receptor alpha	9.01236	10.5337	8.79393	8.52876	8.52173	5.17192	10.4465	10.9677	12.2531	8.041	9.80424	14.4779	7.4286	5.61831	2.03719	0.051079	2.00383	7.73279	6.22762	8.63448	5.22553	8.46889	9.32383	14.1489	5.08837	4.71501	3.09701	2.6474	1.85541	4.50177	6.27883	4.33554	3.2896	15.1563	12.0853	5.34509	7.9481	3.08238	2.10687	7.8368	8.60737	10.0213	12.6473	8.91961	5.67883	13.3957
NM_024674	79727	LIN28A	lin-28 homolog A (C. elegans)	0.706402	0.252161	2.80938	0.059896	0.057046	0.22966	1.98854	0.673602	0.418819	0.270572	0.209769	0.152221	0.230343	0.106146	0.277415	0.187362	0.127861	0.350865	0.180733	0.131793	0.212689	0.291569	0.273665	3.08278	0.12227	0.083839	0.053126	0.105708	0.068522	0.113695	7.01894	0.861391	22.1008	1.01484	8.04571	1.76097	0.09236	0.085376	0.035685	0.214551	0.14698	0.319284	0.228523	0.293037	0.259445	0.237585
NM_004664	8825	LIN7A	lin-7 homolog A (C. elegans)	8.88167	9.7672	7.81132	8.80507	9.95851	8.27281	4.84448	5.78369	5.34766	5.68256	5.39581	8.54219	11.1882	7.18129	10.6084	3.128	1.90504	9.75719	7.17618	7.92206	6.20006	8.90677	11.2747	14.0788	10.9275	8.90897	13.2347	3.66534	4.30091	5.42986	8.92943	15.2852	9.19764	10.4767	10.4718	9.80405	13.2471	9.63539	10.1304	9.98175	9.7157	11.164	7.04751	6.36462	5.65231	3.72529
NR_023919	29092	LINC00339	long intergenic non-protein coding RNA 339	2.60256	2.87586	2.90795	2.70424	3.39253	3.26243	1.62041	1.59971	1.62089	3.65482	3.56071	3.45602	3.6853	2.73122	2.0571	2.90824	3.46559	2.87744	2.32376	2.39874	2.71601	5.96546	5.11923	3.30433	2.10512	2.50674	1.77835	3.9181	4.26046	1.32692	0.010112	2.12186	2.64142	4.45135	2.62799	3.16794	1.86892	3.04946	1.748	5.40913	4.52785	4.62896	2.145	3.65256	2.07625	2.70934
NR_045678	729678	LINC00847	long intergenic non-protein coding RNA 847	1.50634	3.10342	0.165698	1.67567	4.49027	3.63393	6.01326	3.98903	2.8938	0.04435	3.19377	0.028729	1.20851	2.46478	3.08498	1.98034	1.59685	0.897312	2.80738	0.001639	0.771355	4.54343	1.5717	1.38087	2.35643	0.627677	1.38578	1.0314	2.73187	0.000225	3.01065	2.10546	2.27672	3.14517	3.1498	3.41234	2.01576	0.677926	2.65481	0.003009	0.00093	0.002622	2.58589	0.734991	0.002531	1.90834
NM_001031803	3993	LLGL2	lethal giant larvae homolog 2 (Drosophila)	0.447116	1.03646	1.28074	0.000762	0.000802	0.000877	3.52275	2.85243	5.24923	0.899814	0.000117	0.898987	2.08294	2.55116	2.69602	1.6841	2.34912	0.919055	2.28406	1.78276	1.90315	0.847644	2.75792	1.76656	2.01816	1.81977	1.5304	0.000336	1.77599	0.869117	0.937248	0.001236	1.36332	2.26417	1.4466	1.94496	0.686918	0.001197	0.519078	0.658612	1.37898	2.24744	2.44998	1.58042	2.80979	5.00289
NR_038956	100506714	LOC100506714	uncharacterized LOC100506714	1.74619	2.32625	0.001182	2.40341	1.79505	8.03275	1.5589	0.87778	2.05937	4.0625	2.45635	0.843031	0.000132	0.951028	1.48139	1.53518	2.63651	0.835513	2.177	2.56572	0.679279	0.000123	2.70245	1.51879	3.87212	0.000945	2.62079	2.64432	1.33067	2.43768	2.75286	2.89225	3.37889	1.71944	2.63379	3.89397	4.88857	3.38914	7.16473	4.755	3.02675	2.33783	1.14532	0.00027	1.331	0.887357
NR_120683	100507316	LOC100507316	n/a	4.28694	7.73154	8.7275	6.33146	4.63847	3.59609	10.6339	7.33057	6.31039	6.25503	6.37858	7.71804	8.77933	10.4796	8.14746	13.8407	12.2505	4.70936	7.77851	10.3219	11.2092	10.2962	14.1852	3.59429	7.12312	6.87637	8.06817	9.8092	11.1016	10.448	9.99518	9.17836	4.64109	10.8179	9.93098	7.01495	4.19914	4.67876	6.41367	7.55022	9.58376	5.35937	10.4352	10.6739	9.39023	6.01795
NR_002821	400927	LOC400927	TPTE and PTEN homologous inositol lipid phosphatase pseudogene	2.21879	1.48645	1.83929	3.56832	2.56355	2.07987	3.34002	1.92797	3.18473	3.2456	1.87281	3.08891	2.83914	3.35818	2.77748	6.72172	2.53562	1.01043	3.51208	3.37292	2.60847	2.25627	2.78344	0.952202	2.78083	1.81255	1.6753	2.98573	3.20594	3.70289	3.79601	4.58424	2.9156	2.82757	1.67637	1.21782	3.55735	2.61776	2.51744	4.87872	2.76653	3.40493	2.48888	0.968509	3.24919	0.958791
NR_076392	9361	LONP1	lon peptidase 1, mitochondrial	5.96298	30.223	18.7148	23.7529	24.1224	19.5191	28.2354	22.3518	29.8913	22.2141	19.8399	21.5566	26.7275	24.6486	21.9552	43.439	34.8944	18.4526	25.9795	34.8	30.4851	34.5208	27.3379	21.9987	30.3324	22.1564	22.1546	27.7348	18.1335	18.6737	21.3424	12.0092	11.5652	25.1539	23.6671	24.4751	23.8638	26.933	22.1813	27.8406	30.9523	20.6811	28.0179	29.0353	35.8297	23.3437
NM_013437	29967	LRP12	low density lipoprotein receptor-related protein 12	4.36673	4.69888	3.03527	3.56604	4.4554	4.2005	1.85095	2.59602	1.55805	2.34813	2.20503	2.10307	3.73785	2.44857	3.50287	2.87723	2.36415	3.40426	2.1256	2.67697	0.960604	6.51152	3.37381	2.05131	3.16973	2.50687	3.19053	2.42009	3.32652	1.93911	0.000922	2.32866	2.49432	4.16008	5.0344	4.04368	3.43652	0.765351	1.59755	3.41919	3.05444	4.43221	4.02737	2.38697	1.96223	3.61097
NM_017640	55604	LRRC16A	leucine rich repeat containing 16A	1.6065	1.67465	2.58178	2.04029	2.42085	1.34981	3.18139	2.69255	3.70828	1.85072	0.716593	0.53854	4.23391	2.29715	2.20526	2.82674	1.62722	3.61523	2.1406	3.18715	1.05007	4.01026	3.06964	2.20193	2.22402	2.56547	1.10703	1.6879	0.732924	2.09124	0.889991	2.11342	3.31992	0.012026	1.49622	1.73063	2.41932	2.62693	1.76686	1.36774	1.42748	1.40452	2.82692	2.50389	2.51149	3.87141
NM_001128922	2615	LRRC32	leucine rich repeat containing 32	3.43694	0.869166	2.14345	0.064003	0.184536	0.145796	7.85571	5.874	10.6719	1.80809	1.15885	1.41144	8.62969	9.30451	6.45871	2.00623	1.7413	0.042743	5.50438	3.50193	3.66296	4.66678	3.95434	2.29604	0.607098	0.718517	0.473405	1.36643	1.28501	1.15937	1.32884	0.890065	0.787406	1.31602	3.96705	3.23071	0.288974	0.373984	0.47552	3.4383	3.96589	4.22459	2.33268	2.98619	4.1329	7.48289
NM_001142928	65999	LRRC61	leucine rich repeat containing 61	0.64423	0	0.175016	0	0	0	0	0.32299	0.256076	2.02389	1.82668	1.59344	0.696532	0.616839	0.63128	0.837297	1.20934	0.643083	0.110483	0	0	5.09862	5.69864	4.18247	1.15205	1.08028	0.983119	0.225538	5e-06	0	1.743	1.49022	1.20467	9.4522	8.40131	9.2264	4.07541	4.74151	5.37201	0.352472	0.737275	0.663159	5.13203	4.14899	4.76311	3.95722
NM_152611	164312	LRRN4	leucine rich repeat neuronal 4	7.69845	0.981606	2.93039	0.015493	0.03147	0.017593	9.48719	8.45783	10.8323	0.994842	0.800796	0.902385	5.40379	4.62337	4.04881	0.375769	0.931697	0.806438	7.12255	4.87313	5.0774	3.31153	1.86094	1.49983	0.770525	0.22706	0.439374	0.582685	0.354099	0.492573	2.09044	0.758409	1.11415	3.69608	4.66346	2.29282	0.072803	0.09415	0.122971	2.134	2.45492	2.64128	5.24337	3.75045	4.88707	19.3963
NM_002347	4062	LY6H	lymphocyte antigen 6 complex, locus H	0.636144	5.93041	11.6251	35.2762	41.7546	27.2165	10.1809	6.36933	6.33609	9.79508	20.1992	14.5397	13.8341	17.0053	12.1619	40.4479	26.8867	11.8493	14.0125	18.7521	13.3455	13.4375	21.9938	18.6005	10.3543	21.8476	21.0895	25.9452	22.6955	16.0831	12.9811	5.40059	12.7675	25.581	22.4257	26.9455	22.1279	19.4172	21.487	29.29	25.5955	21.6652	16.6977	12.8884	15.0536	5.48527
NM_017816	55646	LYAR	Ly1 antibody reactive	3.86303	3.46452	6.50788	3.51082	2.66261	1.52846	2.13778	4.51136	4.03075	1.69936	0.624853	0.614114	2.63975	2.35963	2.8329	8.4e-05	0.696359	1.18377	2.01206	2.15602	2.55626	2.67437	1.41258	2.81196	2.68569	1.6026	9e-05	1.36587	0.669437	8.5e-05	3.55306	5.01285	5.19231	8.60609	6.38189	5.91044	4.70213	3.40699	0.717124	2.39438	4.39348	3.56934	1.17364	2.72995	3.33223	4.5972
NM_012323	23764	MAFF	v-maf avian musculoaponeurotic fibrosarcoma oncogene homolog F	1.37589	1.06501	0.874262	2.24262	1.15146	2.01351	1.91932	0.83099	2.13108	1.33741	2.00741	1.35656	1.93268	1.88989	1.82326	1.95847	0.880256	0.600488	2.06571	1.96981	2.76494	0.917243	1.94643	2.78806	0.193395	1.95692	0.002931	1.9939	2.78375	2.01254	3.37399	2.21444	2.35138	2.7445	2.15395	2.05161	3.05596	1.83769	3.58813	1.92195	3.70923	2.71782	0.790483	0.249361	1.5449	1.51258
NM_002359	4097	MAFG	v-maf avian musculoaponeurotic fibrosarcoma oncogene homolog G	2.29637	0.009339	3.14695	4.27441	4.22035	4.53989	3.93382	0.684936	3.94407	3.11658	3.25892	2.63162	3.03506	2.70222	2.39058	1.91048	2.79293	2.32572	3.7797	5.78783	4.25298	1.22084	2.24218	4.55628	2.23015	4.25129	3.18656	2.62718	2.0652	2.19536	5.7803	3.04882	4.70629	3.27647	5.46088	2.58011	4.58956	5.32376	4.53201	3.93342	3.82013	3.1478	0.004643	2.40464	2.73074	3.54744
NM_006785	10892	MALT1	mucosa associated lymphoid tissue lymphoma translocation gene 1	4.49962	4.08574	4.14122	2.76318	2.20951	2.46346	2.93416	3.13798	2.25044	2.87871	1.97881	2.12927	4.96097	3.51259	3.82284	0.000412	1.22329	1.94351	3.41151	2.62052	3.01611	4.06397	2.63906	2.64573	1.87061	2.00819	1.51132	1.77115	1.72066	3.26493	2.57132	4.50981	3.18102	3.13679	3.15983	2.12246	0.929005	1.32074	1.45325	3.52932	3.9641	4.62041	3.0299	3.19299	3.16256	5.56034
NM_005907	4121	MAN1A1	mannosidase, alpha, class 1A, member 1	39.1242	7.65884	15.255	1.7515	2.159	1.84889	30.8947	35.3371	38.8065	7.45159	6.49192	10.066	33.2253	30.8143	23.591	4.92314	5.45362	10.6365	23.7327	19.175	16.1528	27.065	17.6722	23.6256	10.4167	2.74817	7.02684	6.26607	5.17004	5.15832	8.17744	6.457	5.61079	18.8329	18.6488	10.8799	2.92485	1.19007	1.48378	8.85946	13.487	14.8696	17.9356	18.2474	18.1931	92.1792
NM_002756	5606	MAP2K3	mitogen-activated protein kinase kinase 3	0.957779	1.98772	2.29933	0.7664	1.16923	2.203	2.66106	0.000329	1.62154	1.49515	1.82267	0.565739	0.933476	2.74799	2.08226	3.6397	4.24998	2.41163	2.26898	1.61398	2.65325	4.15938	3.45839	2.34667	2.1439	2.11788	2.19029	0.884041	3.73655	2.24595	0.812227	0.002534	3.43855	2.13204	1.4478	1.0016	0.284829	0.485414	1.06845	2.34671	2.90535	2.49074	1.41942	3.65785	1.41324	1.75211
NM_001301072	4216	MAP3K4	mitogen-activated protein kinase kinase kinase 4 isoform d	4.40707	2.47236	2.46643	3.16158	2.59267	4.14881	3.17989	3.39299	2.36984	2.00399	0	1.28751	1.85689	1.58507	1.93734	0.751271	0.290934	0.802699	1.72326	2.04912	1.39354	1.56817	1.68205	2.76453	0.817675	1.55859	1.53017	1.20501	1.16251	1.46571	1.68987	4.14553	2.8618	1.71766	1.78949	1.95218	1.93333	1.53849	1.26208	1.96389	1.39152	1.14091	1.29867	2.27275	1.92977	1.7568
NM_001204137	4152	MBD1	methyl-CpG binding domain protein 1	0.860495	3.62381	0.069473	3.4295	5.38472	5.48683	0.620079	2.81384	2.29386	3.64706	3.50388	0.683016	5.11558	0.558998	4.91449	3.90626	4.12306	4.72786	1.04045	3.17664	5.32967	4.63529	0.885753	0.730522	3.52298	2.14009	1.8922	2.56592	1.25265	0.000473	4.23626	4.7936	2.49226	4.78757	2.11122	3.07187	3.52931	7.52768	5.19348	4.22237	4.10226	3.52517	3.46001	4.41505	2.93521	2.6166
NM_015889	51586	MED15	mediator complex subunit 15	3.43847	2.29274	3.83551	2.40642	3.18146	2.70222	5.14459	5.24984	6.33812	3.37854	3.00242	3.31089	4.55686	1.38267	4.34531	6.20804	3.50921	2.76631	5.08324	3.50821	4.61605	1.85734	4.82449	0.030616	3.52087	2.72846	4.56586	1.36388	2.56959	2.11942	6.0973	3.98658	2.18818	0.596639	4.08733	3.09258	5.57369	4.77321	3.33911	5.42456	4.20041	4.89027	3.757	3.11166	4.46919	1.37742
NR_002766	55384	MEG3	maternally expressed 3 (non-protein coding)	0	0	0	0.383017	0.729566	1.09994	0	0.089961	0	76.0864	21.8256	56.7159	9.81448	6.50625	6.77337	0.04515	0	0	0.034423	0	0	0	0	0	0	0	0	0.094312	0	0.169317	1.38736	2.04589	1.23765	0	0	0	2.78495	2.43415	1.40561	0	0	0	0	0	0	0
NM_001301833	51072	MEMO1	mediator of cell motility 1	7.23167	9.28347	4.09019	6.63259	8.89266	3.27652	5.75896	6.3195	3.41019	4.92388	8.59512	8.0626	7.04998	3.83604	1.08223	4.00007	3.83361	7.41923	3.40994	4.66986	5.31236	4.53089	6.05469	6.77577	8.65961	8.93627	5.93631	5.34682	1.85695	0.880999	0.004044	5.11087	2.56659	8.89099	8.39037	8.65325	7.35287	7.33139	7.28642	6.63888	5.52414	5.82539	7.10802	5.28952	7.91673	6.9941
NM_177525	4232	MEST	mesoderm specific transcript	79.6369	76.4658	45.7536	31.0711	28.1896	8.82299	0.188719	0.121624	0.91233	107.255	121.915	110.836	111.976	82.8136	77.32	58.5305	68.7734	147.897	107.445	103.379	60.2882	125.516	79.7577	105.392	131.473	117.45	115.022	95.8064	56.478	39.8286	65.3892	27.8373	57.7903	74.4723	63.4033	44.178	48.2638	26.2213	41.8039	80.2161	71.5824	86.4169	167.329	169.107	172.838	139.714
NM_001206984	124512	METTL23	methyltransferase like 23	5.60806	6.93681	3.56555	3.62392	5.00159	2.723	3.08211	4.47654	4.78942	3.12293	7.31973	1.58243	5.49924	1.88532	6.94832	8.82865	8.57995	6.18326	5.30655	4.92207	6.60612	3.61332	5.6129	6.59984	7.35519	6.43572	2.12989	6.71226	5.22093	3.01647	0	0.000444	4.7655	5.77626	10.7683	9.4415	4.02397	3.13464	2.81031	7.11891	8.09521	8.72188	5.34371	2.56039	7.64684	6.13996
NM_020300	4257	MGST1	microsomal glutathione S-transferase 1	10.6117	28.3847	9.16737	10.2666	8.39183	9.52547	2.10336	3.45307	2.05625	11.508	18.0919	10.7345	12.2212	13.4528	14.8679	8.72709	2.82608	6.78098	10.005	7.29298	7.52367	10.5291	9.43396	10.8864	4.75455	5.70373	6.77597	15.5801	16.6601	11.4838	10.0696	9.25271	9.44949	5.95925	3.16578	0	4.44396	3.1309	6.36424	7.10014	9.01824	6.83206	9.57539	10.0232	9.60725	4.90221
NM_001202553	8190	MIA	melanoma inhibitory activity	1.50451	2.15627	1.73311	1.25141	0.281062	1.12425	0.447069	1.8026	1.10004	1.3181	2e-06	0.500361	0	2.18818	1.96728	1.919	2.15926	0.257821	1.3049	1.02366	0.938316	1.13849	1.36275	0	4.87225	1.51995	2.31789	1.90952	1.85593	0.221675	1.55266	2.03648	0	1.26204	0	0	0.752863	0.740222	1.01721	0.86464	4.64693	1.28918	0.644	0.676771	1.14088	0.460913
NR_033320	440823	MIAT	myocardial infarction associated transcript (non-protein coding)	2.88838	6.18041	4.49352	9.02353	13.6846	17.4823	4.01247	4.11882	3.0183	18.4855	4.27609	6.11746	4.65616	3.85612	4.03303	3.2048	2.83708	2.38431	2.90116	4.27949	3.50828	3.59453	3.25019	4.13272	3.09401	5.79767	2.42843	1.3552	1.56764	3.42217	7.34109	9.5029	6.46179	1.6403	2.80781	2.38942	7.03323	8.33513	2.27833	6.1563	3.44012	7.55895	1.94905	1.61562	2.36355	0.420563
NM_001098790	58526	MID1IP1	MID1 interacting protein 1	1.00471	2.89607	3.14055	1.28118	2.08378	3.60974	6.60001	3.12398	6.27907	4.9048	6.27476	4.67153	6.21403	7.16924	7.2548	8.74113	9.15724	1.54661	8.77353	5.79506	9.81085	10.0844	9.52144	7.6278	8.77998	6.71251	8.23962	9.65435	14.5549	7.72573	8.98536	1.40468	7.82982	3.70331	5.39465	7.08881	7.01362	6.24984	6.85881	8.14356	5.14105	7.20954	6.07916	4.38424	7.38954	4.27833
NM_001297599	166968	MIER3	mesoderm induction early response protein 3 isoform 2	4.23863	5.33013	4.73522	3.23421	3.84579	3.03124	3.85552	4.32403	3.39871	3.95945	0.390047	4.15953	4.59775	4.73024	3.91083	0.449824	2.0332	1.98993	2.35254	3.48093	3.30226	3.99974	3.85768	6.33557	5.33592	3.62716	4.29935	1.75165	1.78507	1.49782	3.41579	6.05582	3.61473	4.37994	4.3292	4.58342	3.25699	2.58273	1.44355	4.16485	5.33652	3.33218	3.25888	4.79661	3.19632	4.63034
NM_015716	50488	MINK1	misshapen-like kinase 1	2.34673	3.41449	0.000286	0.474158	1.25232	0.815989	1.3469	3.31411	2.48347	2.70417	0.267022	2.92329	4.04223	1.6762	1.42213	8.95488	7.98309	5.55899	3.51907	3.01062	1.95074	1.99512	2.42717	2.74695	3.17254	2.95057	2.01656	0.554028	1.86357	2.74585	0.713689	0.737061	9e-06	0.001532	1.00277	0.002996	1.29399	2.5011	0.001994	2.41551	1.67688	3.86417	2.62459	3.74656	2.81913	2.85073
NR_036050_dup1	100302160	MIR1233-1	microRNA 1233-1	0	0	0	0	0	0	0	0	0	0	0	0	0	0	0	0	0	0	0	0	0	0	0	0	0	0	0	0	0	0	0	0	0	0	0	258.078	0	0	0	0	0	0	0	0	0	0
NR_036262_dup1	100422885	MIR1244-2	microRNA 1244-2	114.958	0	0	131.345	0	0	0	0	0	74.7728	0	0	376.294	0	0	222.82	95.7324	96.0015	70.9518	0	181.829	0	0	251.69	0	0	150.464	0	0	0	0	202.601	92.6425	0	0	258.078	71.3041	0	0	0	0	0	0	58.3255	0	0
NR_031650	100302143	MIR1248	n/a	0	0	0	0	0	0	104.728	0.003279	0	0.003026	0	0.032991	0.061437	6.83667	0	0	0	0	0.000172	0.01351	0.001145	0	0	0.000183	0	0	0	0	8.2e-05	0.003019	0	0	0.000541	0	6.3e-05	0.000205	0	0	68.7039	0	0	0.002851	0	0.00039	0.000212	0
NR_031664	100302279	MIR1262	microRNA 1262	0	0	0	0	0	0	0	0	0	0	0	0	0	0	0	0	0	0	0	0	0	0	0	0	0	0	0	0	0	155.041	0	0	0	0	0	0	0	0	0	0	0	0	0	0	0	0
NR_029621	406987	MIR204	microRNA 204	0	0	0	0	0	0	0	0	0	0	0	0	0	0	0	61.5516	0	0	0	0	0	0	0	0	0	0	0	0	0	0	0	0	0	0	0	0	0	0	0	0	0	0	0	0	0	0
NR_029623	406992	MIR210	microRNA 210	0	0	0	0	0	0	0	0	0	0	0	0	0	0	0	0	0	0	0	0	0	0	0	0	0	0	45.6415	0	0	0	0	0	0	0	0	0	40.9794	0	0	0	0	0	0	0	0	0
NR_128711	103504731	MIR3648-2	microRNA 3648-2	0	13.6543	6.84492	4.27133	1.3779	10.424	11.2159	10.4529	9.80619	12.257	5.50186	1.74177	5.44881	13.5859	16.9367	12.1148	12.5823	3.96525	20.2532	26.7785	31.5544	17.1892	12.5156	14.0661	15.6219	8.58816	3.89334	1.88734	5.52439	7.49041	7.24759	17.5442	90.8569	8.88087	6.45228	6.33341	17.6252	7.58821	29.4345	12.5371	6.01366	8.87341	1.70429	9.1772	3.76972	9.82996
NR_128714	103504728	MIR3687-2	microRNA 3687-2	0	0	0	0	0	0	0	0	0	0	0	0	0	0	0	0	0	0	0	0	0	0	6680.18	0	0	0	0	0	0	0	0	0	3851.86	0	0	0	0	0	0	0	0	0	0	0	0	3706.38
NR_037482	100500851	MIR3918	microRNA 3918	0	0	0	0	0	0	0	0	0	0	0	0	332.471	0	0	198.484	0	0	0	0	0	0	0	0	0	0	0	0	0	0	0	0	0	0	0	0	0	0	0	0	0	0	0	0	0	0
NR_037500	100500865	MIR3936	microRNA 3936	0	0	0	0	0	0	0	0	0	0	0	0	0	72.9469	0	0	0	0	0	0	0	0	0	0	0	0	0	0	44.0826	52.0779	0	0	0	0	0	0	0	0	0	0	0	0	0	0	0	0
NR_036199_dup1	100423004	MIR4315-1	microRNA 4315-1	0	0	0	440.794	0	0	0	0	0	0	0	0	0	0	0	0	0	0	0	0	0	0	0	0	0	0	0	0	0	0	0	0	0	0	0	0	0	0	0	0	0	0	0	0	0	0
NR_039644	100616477	MIR4442	microRNA 4442	0	0	0	0	0	0	0	0	0	0	0	0	0	0	0	0	0	0	0	0	1808.45	0	0	0	0	0	0	0	0	0	0	0	0	0	0	0	0	0	0	0	0	0	0	0	0	0
NR_039666	100616209	MIR4461	microRNA 4461	0	0	0	0	1967.61	1013.79	0	0	0	658.157	802.376	786.799	0	1525.77	1706.75	2026.75	851.219	0	653.917	0	0	0	1655.3	763.226	616.122	0	0	1296.12	0	0	0	0	0	0	750.778	1204.18	0	0	0	0	0	0	891.904	536.262	675.852	0
NR_039740	100616404	MIR4515	microRNA 4515	0	0	0	0	0	0	0	0	0	0	0	0	0	0	0	0	0	0	0	341.404	0	0	0	0	0	0	0	0	0	0	0	0	0	0	0	0	0	0	0	0	0	0	0	0	0	0
NR_039741	100616258	MIR4516	microRNA 4516	0	211.016	0	0	0	0	0	0	0	0	0	0	0	0	0	0	0	0	0	0	0	0	0	0	0	0	0	0	0	234.813	0	0	0	0	0	0	0	0	0	0	0	0	0	0	0	0
NR_039969	100616408	MIR5047	microRNA 5047	0	0	0	0	0	0	0	114.587	0	0	111.278	0	0	0	0	0	0	0	0	0	0	0	0	0	0	0	0	0	0	0	0	0	0	0	0	0	0	0	0	0	0	0	0	0	92.6437	0
NR_030280	693139	MIR554	microRNA 554	0	0	0	0	0	0	0	0	0	0	0	0	0	0	0	0	0	0	0	0	0	0	154.198	0	0	0	0	0	0	0	0	0	0	0	0	0	0	0	0	0	0	0	0	0	0	0
NR_030290	693149	MIR564	microRNA 564	0	0	0	0	0	0	0	0	0	0	0	0	0	0	0	0	0	0	118.933	0	0	0	0	0	0	0	0	0	0	0	0	0	0	0	0	0	0	0	0	0	0	0	153.047	0	0	0
NR_106748	102466616	MIR6132	microRNA mir-6132	0	0	0	0	0	0	0	0	0	0	0	0	0	0	0	0	0	0	0	0	56.8078	0	0	0	0	0	0	0	0	57.0002	0	0	0	0	0	0	0	0	0	0	0	0	0	0	0	0
NR_030366	693221	MIR636	microRNA 636	0	0	0	0	0	0	0	0	0	0	0	0	0	0	0	152.085	0	0	0	0	0	0	0	0	0	0	0	0	0	0	0	0	0	0	0	0	0	0	0	0	0	0	0	0	0	0
NR_030371	693226	MIR641	microRNA 641	0	0	0	0	0	0	0	0	0	0	0	0	0	0	0	0	0	0	0	0	0	0	0	0	0	0	0	0	0	0	0	0	0	150.799	0	0	0	0	0	0	0	0	0	0	0	0
NR_106761	102465252	MIR6506	microRNA mir-6506	0	0	0	0	0	0	0	1409.56	0	0	0	0	0	0	0	0	0	0	0	0	0	0	0	0	0	0	0	0	0	0	0	0	0	0	0	0	0	0	0	0	0	0	0	0	0	0
NR_106997	102466864	MIR6516	microRNA mir-6516	0	0	0	0	0	0	0	0	0	0	0	0	0	0	0	0	0	0	0	0	0	0	0	0	0	0	0	0	0	361.273	0	0	0	0	0	0	0	0	0	418.408	0	395.544	0	0	0	0
NR_030395	724028	MIR658	microRNA 658	0	0	0	0	0	0	0	0	0	0	0	0	0	0	0	0	0	0	91.9886	0	0	0	0	0	0	0	0	0	0	0	0	129.66	0	0	0	0	0	0	0	0	0	0	0	0	0	0
NR_030386	724033	MIR663A	microRNA 663a	411.839	811.745	2568.4	1646.88	1471.46	2709.1	444.349	923.347	1134.4	1093.59	2269	292.281	1662.35	4482.57	7299.26	1190.9	1394.46	336.533	1000.28	1767.37	2092.48	1051.48	2654.84	1358.57	531.071	935.477	406.967	1090.61	1563.37	2480.65	1658.22	1059.79	6832.09	987.791	556.46	1349.45	1006.04	720.516	1884.97	1805.68	813.403	463.743	966.374	1032.13	757.276	508.791
NR_031608	100313824	MIR663B	microRNA 663b	0	28.1812	0	0	0	0	0	31.6544	0	0	0	0	43.1619	0	0	0	36.9139	0	104.475	28.3025	66.9581	43.2383	0	32.6008	0	0	0	0	0	33.7368	0	0	101.829	0	0	42.3899	106.507	0	0	95.4582	0	0	0	45.4219	27.738	0
NR_106862	102465482	MIR6804	microRNA mir-6804	0	0	0	0	0	0	0	1286.38	0	0	0	0	0	0	0	0	0	0	0	0	0	0	0	0	0	0	0	0	0	0	0	0	0	0	0	0	0	0	0	0	0	0	0	0	0	0
NR_106992	102466854	MIR7705	microRNA mir-7705	0	0	0	0	0	0	0	0	0	0	0	0	0	0	0	0	0	0	0	0	0	0	0	0	0	0	0	4350.58	0	0	0	0	0	0	0	0	0	0	0	0	0	0	0	0	0	0
NR_106999	102465835	MIR7845	microRNA mir-7845	0	0	0	0	140.113	0	0	0	0	0	0	0	0	0	0	0	0	0	0	0	0	0	0	0	0	0	0	0	0	0	0	0	0	0	0	0	0	0	0	0	0	0	0	0	0	0
NR_030633	100126338	MIR937	microRNA 937	0	0	0	0	0	302.149	0	0	0	0	0	0	0	0	0	0	0	0	0	0	0	0	0	0	0	0	0	0	0	0	0	0	0	0	0	0	0	0	0	0	0	0	0	0	0	0
NR_030635	100126351	MIR939	microRNA 939	0	0	0	0	0	0	479.776	0	0	0	0	0	0	0	0	0	0	0	0	0	0	0	0	0	0	0	0	0	0	0	0	0	0	0	0	0	0	0	0	0	0	0	0	0	0	0
NM_007289	4311	MME	membrane metallo-endopeptidase	7.35034	2.06047	3.61382	1e-06	0	0.230211	4.48439	3.28028	4.59988	2.18294	1.44126	2.64855	11.5333	11.6505	8.92117	1.17261	2.75361	2.84416	8.20893	8.58175	5.16706	9.97841	9.62468	8.82288	5.78736	0.182867	1.02012	2.35772	1.52158	0.640507	2.03523	1.62555	0.918601	10.1947	9.38676	6.64236	0.495994	0.209482	1.27574	1.75047	3.24459	3.77142	8.81155	8.06922	12.0343	32.8036
NM_001302510	4313	MMP2	matrix metallopeptidase 2 (gelatinase A, 72kDa gelatinase, 72kDa type IV collagenase)	21.9128	15.7757	19.7376	2.99567	2.41988	1.17642	27.9006	25.1066	30.6551	12.9249	8.83797	12.5468	29.7254	28.3124	26.7838	32.2119	29.2048	21.3356	28.3221	25.0939	23.1711	35.6866	31.7362	22.007	18.5156	14.8217	13.9794	16.0314	12.7056	14.4783	6.9583	3.12736	0.120179	16.8799	16.1977	8.07933	3.14787	2.03834	3.18507	13.8187	20.5418	19.9024	23.2164	20.2193	23.6051	43.9153
NM_004994	4318	MMP9	matrix metallopeptidase 9 (gelatinase B, 92kDa gelatinase, 92kDa type IV collagenase)	15.7286	1.44449	2.55017	0.059727	0.040431	0.045197	0.507828	0.432207	0.689334	1.22452	1.14258	1.07801	6.68229	6.74845	4.06431	0.874791	0.646734	0.266393	1.83033	1.22297	1.21776	8.72141	4.908	4.30112	1.11313	0	0.062684	0.373986	0.757563	0.258751	0.671544	0.259866	0.598977	4.5097	2.86284	1.86683	0.163713	0.211564	0.189477	1.22109	1.64921	2.39615	4.69725	3.80279	3.82588	5.85953
NM_001015052	4350	MPG	N-methylpurine-DNA glycosylase	19.8466	17.7836	21.7711	11.4558	10.8657	10.8085	21.4951	10.1256	17.168	17.3414	17.2699	7.20758	22.8098	27.3749	33.8888	24.1381	25.7816	6.7169	24.2833	25.3817	23.3502	28.8681	29.9894	15.8004	16.426	11.3537	12.3523	25.7248	29.2849	23.0972	20.3506	19.7481	20.6715	10.4852	12.3476	15.1391	12.2494	14.5166	22.7368	19.494	18.1566	21.8368	14.2202	25.3981	21.5279	26.6457
NM_001278376	4355	MPP2	membrane protein, palmitoylated 2 (MAGUK p55 subfamily member 2)	2.30937	6.47287	3.95395	0.00067	3.18961	2.56103	3.60643	3.31842	3.4379	4.39498	5.06667	2.58944	3.37166	3.70915	4.03964	6.2203	5.49533	2.67096	4.16031	3.35425	3.03672	3.94801	5.41265	1.48865	2.99112	3.00284	3.79176	5.27175	2.20025	4.7152	6.05928	4.4482	3.28581	1.09564	3.08154	2.59299	2.24953	2.15031	2.04056	4.18997	4.98244	3.31005	5.21212	4.8788	4.47843	2.18517
NM_021126	4357	MPST	mercaptopyruvate sulfurtransferase	17.711	17.3485	17.0021	12.8427	1.42841	13.8083	32.1011	24.6024	29.4522	13.7082	18.9304	13.4974	17.6037	23.7938	26.1555	26.0579	25.3349	12.2194	24.0528	27.7685	29.4397	23.2229	28.9686	25.6318	18.368	14.0479	14.4835	27.0631	28.3579	25.353	33.0676	25.3962	28.6388	23.2893	24.1028	23.6367	15.9355	20.0682	34.9138	18.4187	21.5563	18.0719	17.0221	12.0927	17.6665	21.3219
NM_181441	128308	MRPL55	mitochondrial ribosomal protein L55	3.83953	7.47352	6.47147	8.22711	10.1679	11.7147	3.38692	2.06917	2.79336	4.8671	6.71049	6.12566	2.93082	8.11405	7.38191	6.41313	7.37991	1.13044	8.57562	7.25076	15.4932	10.8698	9.73155	4.9353	5.92551	4.73229	3.9071	15.1968	22.1603	13.2764	8.64816	10.3665	12.4157	12.5981	17.0622	14.8541	9.90977	7.77566	13.3544	10.1586	15.7245	12.7774	6.84249	9.09052	6.56655	6.02604
NM_001301267	4495	MT1G	metallothionein-1G isoform 2	0.676128	0.308584	4.5e-05	2.04142	0.625044	1.48303	25.2476	24.8664	42.3557	2.84246	0	1.72627	1.3154	1.28873	0.692563	12.9916	15.9793	7.00435	14.859	6.75262	9.39556	11.9191	9.38853	12.3621	0.879641	0.018388	0.823927	2.47694	27.5367	0.755273	1.55928	2.03048	11.9224	8.12864	3.40899	4.29756	5.03001	0.265304	8.55147	9.2614	3.96061	22.4414	2.55248	2.45309	3.74499	0.415338
NM_005951	4496	MT1H	metallothionein 1H	3.27317	1.43827	1.09916	0.557457	0	1.24443	17.8721	20.0453	32.0988	3.41194	0.259647	5.89373	0.909479	0.503584	2.66516	8.29164	15.0081	4.09246	18.2677	8.866	10.7599	17.4117	8.77012	12.5187	2.24759	0.225095	0.851262	3.91475	19.5661	1.04396	3.29099	6.03811	10.9374	23.2587	6.63417	12.7498	3.7011	0.274119	3.71912	8.42528	6.94462	24.6194	2.6038	0.669171	3.31619	1.92093
NM_005952	4501	MT1X	metallothionein 1X	6.80964	5.82223	7.99958	3.2474	3.08555	4.23103	20.914	13.9035	21.3362	0.710269	3.78438	2.62459	7.06114	10.2664	8.46768	12.8878	12.7239	10.8648	16.7078	14.5694	17.2406	6.54564	2.5568	7.49718	5.73296	3.0603	1.65452	6.25169	8.71733	2.28244	6.07134	4.10434	26.5659	28.6211	22.1242	23.969	6.02488	5.32749	9.73056	13.9631	11.4138	16.2637	17.0209	9.97181	16.6516	7.465
NM_005954	4504	MT3	metallothionein 3	0.911941	4.05117	1.97521	61.6204	53.5783	51.2842	0	0.426787	0.275453	49.7672	49.3945	42.0926	7.30145	6.58444	10.5178	16.3192	14.7761	6.11939	1.30565	2.41239	1.50365	2.98763	4.62934	2.13894	6.82118	8.8148	7.38282	5.08294	8.64658	3.83278	8.26283	7.7568	6.84601	3.83977	4.59342	2.27127	9.23478	11.6183	15.6921	5.86132	5.53624	3.18685	4.27966	2.52581	3.12997	0.772764
NM_006980	7978	MTERF	mitochondrial transcription termination factor	3.55376	2.82876	4.10628	3.95221	3.44624	3.30037	2.46286	2.85657	1.92161	0.000296	2.02941	3.13523	3.4966	2.28688	3.39923	1.05506	1.21622	2.85347	2.71298	1.54176	2.62506	2.70059	2.85375	3.30286	2.6439	1.86069	3.94358	1.6842	1.11155	1.83364	3.72383	3.91642	3.5879	3.88098	2.6054	2.27939	3.41631	2.55425	3.35188	2.83846	3.53761	3.51271	3.52636	3.30806	2.71104	2.13996
NM_001033050	80298	MTERFD3	MTERF domain containing 3	3.49831	3.7233	3.34633	3.22291	3.64806	2.98692	4.53922	3.89616	4.49289	1.65371	1.28181	2.46949	2.45309	2.71932	2.11895	2.65696	1.76921	1.97366	2.63393	2.84569	2.7055	2.601	3.3203	3.56402	2.73875	0.648762	3.25896	1.6386	0.000551	2.06593	2.64238	4.05511	4.7933	3.63337	4.09001	4.0519	2.05769	1.89715	2.60681	2.1845	4.46488	3.51155	3.61878	2.7786	3.49204	3.6399
NM_001190708	100463488	MTRNR2L10	MT-RNR2-like 10	0.796057	7.99158	2.39616	3.81192	4.30403	4.48623	2.57753	2.54397	1.75491	4.36842	8.52492	6.05498	3.6456	3.70199	3.96881	7.77333	9.73771	8.46197	3.4947	2.78405	2.80604	4.06975	4.63278	4.92726	9.50126	4.81399	10.003	10.4891	13.2287	7.21362	5.20045	2.97267	3.95899	6.40747	6.42032	6.87195	3.45894	6.99268	8.52195	8.12446	6.42609	6.80343	7.72132	8.46835	9.32625	4.36254
NM_001190487	100463482	MTRNR2L6	MT-RNR2-like 6	2.17313	12.8037	4.29352	4.43873	5.00202	6.06575	5.05439	5.53857	4.27233	6.88932	12.6129	8.30429	3.73046	4.76208	4.84382	11.2218	15.0486	13.9828	6.33601	4.69602	5.23333	6.39348	7.94518	6.41669	15.0315	6.63039	15.3507	19.0227	18.3441	10.0027	7.40006	5.91188	5.93853	7.64466	8.68369	8.72205	7.76118	13.1742	15.2366	12.5045	10.5923	10.8118	10.3031	13.8728	14.6861	6.1387
NM_002454	4552	MTRR	5-methyltetrahydrofolate-homocysteine methyltransferase reductase	3.01756	3.45994	3.10774	3.518	3.47496	2.41439	4.13657	4.24606	4.42576	2.70112	0.002865	0.002698	4.6192	3.50545	2.51942	1.75706	1.02238	0.000623	3.59344	1.93857	1.12385	4.56951	0.001122	4.47419	3.25965	2.11016	2.51584	1.85989	0.003064	2.13633	3.76165	2.16067	0.001147	5.32872	1.88161	0.002905	2.44705	0.954837	0.003175	1.95543	0.002875	4.1942	3.83776	4.19519	1.28601	4.42823
NM_000431	4598	MVK	mevalonate kinase	5.56693	2.96898	2.70324	8.22691	4.18449	8.31094	4.48527	3.58342	4.81486	2.35589	4.14769	3.16671	4.20745	6.50605	7.08668	0.01549	4.37746	2.61603	7.43529	7.00244	8.55632	5.94287	0.016389	5.10987	2.7487	3.12438	5.32232	6.15085	8.27116	6.87052	6.20161	3.64278	5.75523	6.65466	6.51434	8.1224	9.85058	2.61091	11.8931	4.05107	7.1028	8.16512	4.20411	1.41136	1.90063	3.97092
NM_005115	9961	MVP	major vault protein	3.11409	1.86728	4.27865	2.07042	0.118621	2.77421	7.97211	5.46067	5.16095	5.46109	2.29812	3.94605	5.19407	5.73526	7.41027	5.60651	4.4322	2.05718	8.48191	8.759	3.46607	8.56261	1.74137	1.68194	3.31555	3.91723	2.2725	1.66396	5.42492	2.82188	3.73734	0.057832	1.91183	3.94447	7.035	4.22306	6.45817	4.60816	4.96886	3.44768	5.13168	4.81646	5.65362	5.61524	5.09726	11.8178
NM_004997	4608	MYBPH	myosin binding protein H	3.34637	0.069425	5.17852	0.579426	0.160396	0.089626	0.083937	0.081659	0.175349	7.4599	1.96289	0.142472	9.19448	0.071144	0.102749	1.75453	1.53845	3.87457	5.17451	1.45583	1.53389	0	2.04783	0.042414	0.735484	0.964476	0.248468	0.205816	0.600339	0.113973	2.57136	3.05051	0.043983	0	1.1132	0.115744	0.556852	0.958478	0.625899	0.286924	1.64511	1.03201	0.034482	0.065247	0.97046	0.2383
NM_016132	50804	MYEF2	myelin expression factor 2	3.38791	4.99072	4.8942	3.2519	3.24075	3.69195	2.95014	3.44801	2.56788	2.46188	0.891505	4.0264	1.82042	1.77678	2.27206	1.75983	0.000144	0.000184	2.5168	3.34762	2.90805	2.29729	2.62299	2.67702	2.01394	3.4835	2.77163	0.652176	0.61629	1.8104	3.76466	5.69863	3.86327	3.17041	3.54329	2.50458	5.54997	2.5315	1.72858	2.28272	3.59263	3.0056	3.95564	2.92432	2.94767	1.11058
NM_002470	4621	MYH3	myosin, heavy chain 3, skeletal muscle, embryonic	4.19687	0.233443	10.43	1.91924	0.142105	0.150578	0.070467	0.129419	0.127451	17.4203	3.46042	0.319434	17.0524	0.129187	0.159479	1.11683	1.48536	8.91619	14.8835	3.69059	2.77759	0.269846	3.69155	0.225969	1.70111	2.71747	0.511049	0.265829	0.483242	0.468699	5.45652	6.80832	0.135559	0.238558	2.05258	0.215748	2.11877	1.73021	1.23165	0.934588	2.76757	1.73887	0.20306	0.155597	1.14018	0.656563
NM_079420	4632	MYL1	myosin, light chain 1, alkali; skeletal, fast	11.2146	7e-06	18.3978	1.81472	0	0	0	0	0	16.9219	8.7847	5e-06	19.5811	0	9e-06	2.86908	2.3595	15.1505	23.1454	4.68989	4.28967	0.187359	6.91477	1.3e-05	1.7879	2.93077	0.355105	0.254865	2.1599	0.559971	6.12325	11.4166	0	4e-06	3.0879	0.213944	1.99391	1.70292	2.645	2.84381	3.60977	3.56661	1e-05	0.140525	2.93663	1.2e-05
NM_002476	4635	MYL4	myosin, light chain 4, alkali; atrial, embryonic	5.61142	3.3e-05	8.84267	0.854988	0.063321	0.141404	0.00599	0.637601	0.000146	13.626	8.61844	0.550731	13.3076	5.1959	3.3131	5.47363	6.33352	6.4215	18.9756	6.23579	4.32868	2.15684	3.38455	1.4025	1.22976	2.43419	0.782061	1.6418	6.60072	1.8848	4.91451	6.02114	0.624133	2.432	5.57604	3.26044	1.39667	1.50921	0.099708	0.959821	7.62079	3.94089	0.926406	4.38831	4.15792	1.61431
NM_021223	58498	MYL7	myosin, light chain 7, regulatory	1.25759	0.652098	2.49253	0	0	0.112554	14.4221	12.5673	11.5673	2.64801	2.40668	1.60477	3.88753	5.81469	4.03493	2.55155	7.37631	1.92035	1.71888	1.10318	1.30652	6.07294	1.75677	2.22497	0.15322	0.12158	0.310065	1.38119	19.5424	1.99344	0.886297	0.488375	0.991762	13.316	11.2688	4.53155	0.117302	0	0	0.943461	2.60053	3.8806	4.52138	6.95389	4.23306	8.80657
NM_013292	29895	MYLPF	myosin light chain, phosphorylatable, fast skeletal muscle	25.6149	0.345553	54.7534	5.81788	0.1783	0	0.139857	0	0	63.7141	37.8955	1.29933	47.729	0.357615	0.229489	13.6495	20.5394	36.3725	66.0043	12.0003	12.1653	0.401904	19.4762	0.280842	5.68525	9.43935	1.507	4.34253	9.36619	2.64188	18.29	27.9984	0.145978	0.446529	7.51343	0.773577	9.72415	8.06484	8.42299	3.33288	18.9966	8.03532	0.570718	0.646961	6.28033	2.37278
NM_001161819	4430	MYO1B	myosin IB	10.9691	8.22905	12.4957	4.83646	3.444	3.40825	9.44886	9.20541	10.2362	0.731015	0.788482	3.80628	6.73834	3.10089	6.69907	0.001856	1.38756	1.05598	4.04708	3.17873	2.38341	5.00285	5.51121	7.16558	2.39723	1.45411	1.50684	0.486006	1.49609	3.57771	3.39804	4.48925	1.83179	6.7911	5.37212	3.6045	0.55603	1.33947	2.03559	3.58515	6.74116	3.43596	4.84143	3.39953	4.10868	4.98733
NM_001080950	4641	MYO1C	myosin IC	4.9589	4.03778	4.34148	2.89164	2.0365	2.72724	14.9101	11.4996	9.13967	3.02124	6.33851	3.42292	6.42191	5.71426	9.09408	6.77761	8.14868	0.044529	8.68833	5.96306	10.2239	9.56704	6.71857	4.8175	3.37974	3.78573	2.31243	5.10076	0.003241	1.9877	4.21425	1.67765	0.004052	7.57921	11.372	4.48869	2.0662	3.55828	1.66733	8.45152	6.93665	6.46195	2.57906	3.04237	6.08429	15.9742
NM_004145	4650	MYO9B	myosin IXB	3.49735	7.54425	1.19961	3.28068	5.02494	1.91202	4.97952	4.49338	7.62523	6.54015	5.81189	5.56148	7.33843	3.67635	4.92284	2.05057	5.37145	7.49257	7.83979	3.92363	6.81606	0.013009	0.104151	6.79936	3.7277	7.13044	3.28133	5.68264	3.82331	6.16755	0.002409	3.18431	6.72716	7.2321	3.06291	2.88751	6.72675	7.38104	5.53141	3.92278	3.50361	6.36487	0.115064	5.48719	4.42552	8.73132
NM_002479	4656	MYOG	myogenin (myogenic factor 4)	3.4973	0.249642	3.26847	0.631837	0.256448	0.250715	0	0.097929	0	4.1338	1.2667	0.213451	8.66641	0.170693	0.164343	0.908238	1.53653	3.801	6.24207	0.970021	1.74757	0.144553	1.89156	0.101656	0.832472	1.11803	0.198494	0.542426	1.24655	0.364228	3.36447	3.19485	0.052719	0.10745	1.71592	0.046272	1.70684	1.00504	0.750038	0.601855	2.24783	0.767832	0.247934	0.156361	1.0659	0.142818
NM_001083600	79903	NAA60	N(alpha)-acetyltransferase 60, NatF catalytic subunit	3.2999	0.408141	2.26747	1.58104	0.004223	2.24784	3.40691	3.13091	5.48719	2.39395	2.10406	0.334251	3.21895	3.88757	2.1205	3.82535	3.10421	1.61275	4.14133	3.08783	5.135	4.38218	3.41438	3.24283	4.0368	2.46326	3.25561	1.48967	3.58903	3.19316	2.45644	1.74887	3.06882	2.94653	2.67854	2.7745	2.56974	1.60292	2.04298	2.11328	2.18735	1.75722	3.68779	2.97019	4.45476	3.64784
NM_001198993	65220	NADK	NAD kinase	4.36389	7.57814	7.79473	3.37959	6.82315	6.23693	8.88585	6.15839	3.09704	5.24223	12.5696	4.44416	5.9279	8.39162	5.67308	13.1503	10.3606	4.99984	7.60138	9.375	9.98157	8.41325	7.84304	3.36191	6.5683	8.89793	7.85382	6.99985	2.23369	3.76964	0.171101	0.012732	4.74911	10.9233	7.27393	5.66951	2.20049	4.84989	2.15297	6.80694	10.359	6.44247	9.77455	7.69821	6.86334	4.30879
NM_001174087	8202	NCOA3	nuclear receptor coactivator 3	3.87327	0.009679	1.50791	1.31289	1.54651	2.51092	0.005165	2.53046	2.0984	1.51687	2.2262	3.8147	1.60856	0.001024	2.7088	0.693204	1.5328	2.29508	4.00095	2.00141	0.866698	1.85686	0.682899	2.70161	0.777617	2.24693	1.60923	0.88926	1.66539	2.17151	2.07724	4.01428	4.76292	0.050179	0.002451	2.03297	2.98331	1.08256	1.69423	2.03764	0.724702	1.99208	0.892089	2.7995	1.55326	3.31624
NM_024574	79625	NDNF	neuron-derived neurotrophic factor	12.9209	3.96368	12.9691	3.08289	3.13104	3.82722	7.03032	9.19912	7.87109	4.53	3.417	4.93289	15.6741	12.1438	13.562	12.0097	9.86502	24.8956	18.065	17.7029	17.5195	15.6322	13.2741	14.9471	24.1788	25.8292	30.5754	8.66007	7.15488	9.09457	9.01827	11.5727	16.4551	4.87208	3.84252	1.91925	6.64295	4.56201	4.86822	16.2284	13.4678	12.9023	13.5141	12.0951	12.1901	25.3038
NM_201541	57447	NDRG2	NDRG family member 2	3.61749	0.7993	2.78511	2.40127	2.98019	3.38533	4.29601	3.45275	0.032381	2.12946	3.72536	2.03386	3.63092	3.79047	5.15904	5.26681	2.58471	0.447856	2.28905	4.84783	2.38127	5.60233	3.07241	4.44601	1.3e-05	1.38429	0.079707	0.965889	2.2992	3.32233	1.49872	0.963144	1.2542	2.15715	6.59261	2.61801	1.41212	1.09712	0	0.844998	2.76599	3.70273	3.97403	0.953379	5.45932	6.56679
NM_199074	25915	NDUFAF3	NADH dehydrogenase (ubiquinone) complex I, assembly factor 3	12.1839	17.812	23.9787	6.66306	10.9963	2.47097	19.7018	16.4424	20.1911	13.7713	11.6037	9.30307	16.5605	14.2265	15.8141	28.5553	26.0899	19.0119	15.1663	15.8594	12.7071	21.9207	16.9341	17.5794	23.9518	24.4353	19.4792	25.6891	22.5406	16.823	10.7351	1.6505	8.85822	22.3424	20.8197	16.0858	8.01973	2.5323	1.59681	24.8615	19.7884	20.218	31.9424	34.561	26.2388	17.1656
NM_001184987	4717	NDUFC1	NADH dehydrogenase (ubiquinone) 1, subcomplex unknown, 1, 6kDa	24.2253	26.8574	16.4259	10.2316	14.2812	0.005129	21.9451	16.6076	13.5135	13.8672	32.93	7.1203	24.0649	26.8801	28.5099	69.8613	47.2971	21.184	20.7548	21.5287	10.2802	18.3653	36.5711	24.6274	30.8043	6.88846	31.0359	55.0649	12.6894	14.0455	16.2612	8.58156	20.1143	22.5178	0.008556	23.3099	25.1801	19.4358	26.0158	40.4032	42.1243	9.13534	38.1693	42.4196	22.9273	14.7948
NM_001135746	252969	NEIL2	nei endonuclease VIII-like 2 (E. coli)	2.82015	5.16419	1.38995	6.62681	5.31923	4.09897	3.80816	3.23346	3.39569	1.96426	2.40905	2.47771	4.13435	2.85703	3.46622	1.56167	1.53834	2.942	3.62648	3.82297	1.99555	2.44966	2.45271	1.02508	4.74501	3.89375	4.17518	1.68469	1.0919	2.66109	3.99482	3.18162	0.005519	1.41229	3.11301	3.65735	2.51455	1.37682	0.720213	5.75882	4.52825	4.86896	6.24576	4.29203	5.77713	3.48945
NM_024019	63973	NEUROG2	neurogenin 2	9.45516	26.5457	6.81939	4.52186	5.08767	4.48509	2.20802	2.1056	1.68173	8.19716	7.45158	6.9202	12.9358	13.1484	11.8389	1.3887	1.42248	1.1507	6.78803	10.9354	10.3525	1.15029	1.6516	2.13436	1.2969	1.16893	0.993939	11.1585	7.50165	18.0293	11.1735	9.07257	9.02129	19.9805	18.9265	21.3373	24.7169	20.6846	16.0883	5.13561	2.13124	5.37087	8.08892	3.15764	5.2602	0.153703
NM_005384	4783	NFIL3	nuclear factor, interleukin 3 regulated	10.4009	10.3405	7.30899	17.5503	13.6191	17.0918	8.3955	8.2368	8.39268	6.22755	5.81035	8.83326	9.8675	8.17794	7.56682	3.67503	2.41261	4.51682	8.27728	9.87128	7.67751	9.70286	10.2526	7.91681	8.31677	8.93578	9.35063	4.61316	4.31395	0.005015	10.3561	14.8003	13.3147	13.3741	14.17	11.0519	16.1754	13.3699	11.3751	8.92478	9.82576	9.65905	9.49634	7.89699	6.81119	7.38699
NM_152995	152518	NFXL1	nuclear transcription factor, X-box binding-like 1	3.10851	0.001268	3.01375	4.08832	4.13139	2.29256	1.75726	3.31108	1.49094	2.82203	1.38904	3.26549	2.95998	3.0662	3.3253	0.952519	0.930024	1.23636	3.13359	1.37662	2.58105	3.10354	3.80193	4.23764	2.97616	2.6542	1.71429	1.47807	1.41562	2.1304	4.79892	5.3943	5.84894	3.88451	2.52683	2.1892	5.15383	3.99822	3.29395	3.65472	4.27355	3.26789	2.73126	2.53561	0.441064	1.49621
NM_170678	27231	NMRK2	nicotinamide riboside kinase 2	0.509082	0.115478	0.585311	0.101996	0.043425	0	2.07518	2.6068	3.23219	0.659099	0.295362	0	1.35996	0.668285	0.760381	1.90213	2.8371	1.53461	3.64205	5.18037	3.96736	1.85014	1.37904	1.15478	4.74682	4.60622	5.76246	2.61229	2.15049	1.74554	8.43002	1.24643	10.634	0.763344	2.0054	1.27764	0.739228	0.747521	1.2069	1.46566	0.68437	0.484885	5.2661	6.10351	7.4959	0.538232
NM_181689	4826	NNAT	neuronatin	8.65634	0.161474	0.835559	233.778	210.623	195.417	0.521135	0.549475	0.217896	407.209	528.426	422.796	40.1684	45.4584	62.7068	0.989646	0.79493	1.0326	203.926	214.543	203.13	117.237	213.524	138.383	145.294	181.159	176.369	0.127457	0.557617	0.706554	70.4082	68.4737	51.5247	79.7849	75.5925	76.9487	224.815	236.515	280.702	200.536	189.372	178.791	36.1358	42.3355	36.4826	9.8469
NM_182977	23530	NNT	nicotinamide nucleotide transhydrogenase	10.3896	8.31544	10.8602	13.5346	13.3333	14.0919	9.45306	10.0271	11.7811	8.71681	7.35234	8.79883	12.0336	7.49462	9.90515	5.61019	2.95339	15.4769	9.60547	9.58936	8.98724	11.0973	10.2342	10.9153	10.0378	10.0486	12.8468	6.40505	5.16328	6.84585	10.8642	14.0301	11.8186	8.20171	9.73042	9.45969	11.4391	8.43729	7.35117	7.4958	6.58412	9.01229	8.68631	9.10892	8.46713	9.62912
NM_001033047	255743	NPNT	nephronectin	48.1045	6.92643	25.3807	1.5092	1.3293	1.27836	35.9562	35.5604	42.7821	8.92845	5.36721	9.07028	68.8178	48.4218	41.2083	2.84513	6.418	14.6745	32.851	26.2804	22.0777	38.1127	21.0219	34.2444	8.80866	2.76702	5.91358	4.00561	2.84721	2.37807	14.3029	11.8892	6.31051	42.8368	45.7057	23.2689	1.18726	0.903964	0.650225	17.4821	27.9426	27.4088	37.2231	28.9648	30.4467	139.575
NM_024409	4880	NPPC	natriuretic peptide C	5.17031	1.47584	0.117978	4.3519	3.75088	5.2729	0.639659	0.581737	0.964929	2.67444	2.51864	2.37848	0.586673	0.87173	1.99295	2.30395	2.46348	1.19257	1.47893	0.988592	1.05397	1.47046	4.39323	1.92824	5.69984	4.51281	6.89859	3.35597	3.9874	3.80046	3.14461	2.75717	2.67193	1.08967	0.774546	1.76844	1.32423	1.21034	2.14906	5.01105	3.84854	2.16275	0.104496	0.197462	0.122355	0.24128
NM_000905	4852	NPY	neuropeptide Y	29.5677	2.84877	18.4551	5.13824	3.64416	4.05788	72.5709	58.7806	79.9562	21.1157	30.4524	22.7825	24.0643	25.4397	37.7248	12.7889	23.2888	7.42551	63.1388	43.1515	43.4827	30.6973	20.2239	15.9632	4.34977	2.92364	5.58503	17.4144	10.9052	9.79416	16.6682	7.65319	8.84604	83.5868	87.6265	52.1009	2.05213	1.47027	3.24129	35.0347	45.472	55.2486	43.0161	34.3559	41.7479	180.306
NM_003873	8829	NRP1	neuropilin 1	7.34778	4.53887	7.06853	2.28532	1.68715	1.55552	2.05573	3.30522	2.37816	4.00821	1.75616	3.36109	5.42184	4.92497	4.02967	0.311036	0.592308	4.64453	3.92707	3.37836	4.47673	7.25562	4.16842	5.30997	1.18227	0.539734	0.866774	1.86854	0.604678	1.65545	0.938234	2.63828	1.06445	2.3157	3.07299	1.84011	0.783757	0.378526	0.751921	3.76384	3.34637	2.58666	3.48286	4.21843	4.17314	9.16747
NM_032344	84304	NUDT22	nudix (nucleoside diphosphate linked moiety X)-type motif 22	1.51804	5.98553	4.83274	0.938028	2.52054	1.93717	2.66378	1.19175	2.04719	1.52642	3.1315	0.663346	5.65397	2.47044	4.9038	5.46123	7.3455	0.917818	5.21975	1.30997	3.69038	4.90422	5.4728	1.32262	3.58092	1.83167	2.95673	6.15241	6.34588	3.07585	1.05946	2.39891	4.48849	3.25432	1.98052	4.57601	0.493739	1.77673	1.54069	3.34634	2.65276	5.33379	3.96136	3.9895	5.53431	3.64697
NM_001286561	4926	NUMA1	nuclear mitotic apparatus protein 1	4.22757	21.6077	10.7046	19.1785	18.5444	18.6336	18.5943	16.5393	21.0714	21.7025	14.0567	14.1236	15.5416	13.1021	13.8429	20.1309	21.9422	18.0587	18.5209	20.0252	19.6862	12.2679	11.1185	14.7856	13.5332	17.744	16.0878	10.3442	12.626	9.20117	24.2699	12.2035	15.3466	11.4632	11.8815	12.7099	16.189	18.4699	8.31881	20.8698	14.0192	15.261	19.6475	16.6136	17.621	10.6982
NM_001289980	9253	NUMBL	numb-like protein isoform b	2.73003	6.77437	3.21378	3.51115	3.93465	2.1223	4.03936	4.05525	2.51431	4.81324	3.57179	4.33932	2.17423	2.86844	1.90215	0.805519	6.26305	2.31656	3.82038	4.11164	4.44477	5.02753	4.78601	3.57637	3.11388	2.23861	3.17535	3.96125	4.28731	3.11886	0.853656	0.923753	1.97971	4.14947	5.37216	5.69116	3.37418	2.06748	3.25069	5.2931	5.43136	3.85656	2.89208	4.06531	4.41039	3.65643
NM_024576	79627	OGFRL1	opioid growth factor receptor-like 1	26.1319	7.08758	11.1518	5.92724	5.82083	4.82415	34.8038	39.1065	48.1575	7.3315	8.76883	10.0552	23.8021	16.6784	14.0599	4.44489	4.76334	15.6161	22.0373	15.8082	15.2618	17.3737	14.7545	16.7008	6.68258	2.847	4.91764	5.31663	3.71021	3.79919	11.0084	5.95357	5.54401	27.4073	29.291	19.4552	3.70665	2.95371	2.86874	10.9845	13.2728	18.8698	17.9239	15.768	17.1008	60.8202
NM_002543	4973	OLR1	oxidized low density lipoprotein (lectin-like) receptor 1	0.884165	9.3e-05	0.706357	0	0	0	2.81671	2.81258	3.65879	0.835909	0.808987	0.419876	1.66882	1.46479	1.04938	0	0.477883	1.07873	4.5538	3.4512	2.69517	2.66611	1.70006	2.87547	0.424746	5.7e-05	0.095032	1.18039	0.520492	0.265555	0.889999	0.779866	0.399556	2.93027	4.37286	3.06927	0	0	0.000111	2.32528	2.72964	4.94846	2.92798	1.64442	2.82427	10.5799
NM_182647	4987	OPRL1	opiate receptor-like 1	0.336849	0.991139	0.365124	5.61973	6.1662	6.49066	0.914766	1.28172	1.17839	2.66023	1.94913	3.06636	1.3522	1.77816	3.28608	3.49516	5.82149	1.34741	1.55988	2.66279	0.914293	0.915705	0.566752	1.43087	1.56506	2.74665	1.8011	2.32579	3.62935	2.15959	2.07846	2.28123	2.36263	0.049087	1.72298	2.50836	2.75006	2.43261	1.78749	2.72652	2.83771	1.27165	1.12078	0.708989	1.15466	0.535249
NM_001282742	23762	OSBP2	oxysterol binding protein 2	5.01075	3.23721	5.27607	0.198839	0.297072	0	7.14544	5.51017	7.88337	0.577102	0.855875	0.921135	7.73915	7.79755	6.93661	6.79466	5.8424	4.4214	7.2859	7.31095	6.78163	5.88173	6.13481	3.7156	10.607	8.59574	8.89823	3.17411	4.02054	2.40058	1.24846	1.18381	1.9106	3.2485	2.71315	2.0722	0.544557	0.637929	1.08286	5.36222	5.07371	4.41792	10.4797	9.08734	10.473	7.2558
NM_145260	130497	OSR1	odd-skipped related transciption factor 1	13.1446	4.61333	3.05785	0.224977	0.304493	0.283592	9.08278	9.22344	11.4837	4.74323	3.26099	4.22654	12.2884	12.5254	12.2223	5.71573	5.76075	4.90373	11.3164	7.95302	8.18952	13.388	8.26254	7.40877	5.50815	1.5868	2.63404	5.70592	4.02787	3.64268	3.10618	1.46808	1.00205	8.72194	9.23851	5.34645	1.38004	0.872011	1.66375	4.49417	6.7183	7.63467	7.07085	8.36249	8.21524	19.266
NM_025155	80227	PAAF1	proteasomal ATPase-associated factor 1	5.6909	7.16477	5.31311	0.000179	4.7e-05	0	2.66364	5.37788	4.89173	0.000238	2.1966	3.40529	1.8327	5.06165	4.92589	2.26591	1.25933	2.24701	3.5133	4.58408	3.32792	1.16846	3.5755	6.47373	1.76498	3.44028	1.19223	0.000285	1.15515	0	4.89441	5.92281	0.554823	1.29838	7.97263	1.1132	1.79814	2.19194	0.000238	5.94667	1.12427	2.04761	2.98488	1.90724	6.1215	3.26701
NR_110659	102724167	PABPC5-AS1	n/a	1.60901	1.17883	1.62048	6.39415	4.04299	4.69145	1.15241	0.750837	0.242759	1.67781	2.80932	1.93231	0.670462	0.495075	0.952776	0	0.868349	1.07319	0.835438	1.78819	0.793498	0.828446	2.87566	2.00465	2.48715	2.21333	1.39563	3.30129	3.4757	0.770153	2.265	4.1559	2.09173	2.13501	2.60965	1.60029	1.71248	1.88748	3.93986	4.63067	5.25296	5.32691	1.86268	2.41368	1.90297	1.0796
NM_024960	80025	PANK2	pantothenate kinase 2	4.83766	4.12967	4.29552	4.44672	3.91563	1.06059	3.22516	3.58977	2.10259	0.874784	2.53365	2.81422	2.69478	2.41749	3.09992	1.32822	0.000307	3.85768	2.46664	3.09873	4.36203	2.77823	2.62014	5.28784	2.03986	1.96428	3.57912	0.341681	2.19319	0.817726	1.88263	2.12159	4.0974	4.67235	4.23433	3.55684	2.01107	1.09615	2.27474	2.40125	3.32131	2.36447	4.9471	4.55969	2.71926	2.8146
NM_032632	10914	PAPOLA	poly(A) polymerase alpha	25.9433	17.0867	24.3828	15.3795	12.6378	15.3226	21.7961	23.8925	22.9868	4.16458	3.36874	8.85662	17.1535	16.7115	16.439	0.253593	6.87626	9.92348	14.5204	13.416	8.12846	20.8777	11.1909	9.95772	18.3464	12.8675	19.1038	8.47416	7.63351	5.9965	17.9957	26.2616	20.4573	14.465	14.4217	10.5635	19.947	14.1953	15.7857	9.53977	12.9945	15.4759	16.563	14.3105	19.5795	22.678
NM_001037281	50855	PARD6A	par-6 family cell polarity regulator alpha	2.76639	4.86906	2.92674	9.2417	6.63434	9.94009	5.08909	2.67124	2.86043	5.1055	5.83844	3.87303	3.95804	3.33207	4.05347	9.19185	8.08803	2.55463	4.76004	5.90414	5.35917	3.33926	5.2803	2.9568	8.55296	6.73115	7.37911	8.49753	8.43317	9.07102	9.39247	6.5693	5.87589	4.03537	7.46094	8.74788	5.11517	5.10512	6.89674	6.23916	6.24196	4.67327	5.3329	6.07768	5.22975	1.24749
NM_000920	5091	PC	pyruvate carboxylase	1.86884	3.91838	3.76646	3.53428	3.12149	3.4218	4.54304	3.8954	5.09414	3.46032	4.32715	2.95861	4.20676	4.03458	5.0284	4.81675	4.729	3.1862	5.03784	5.63161	2.53606	3.29802	3.01146	1.67237	3.37206	4.73068	3.58789	4.68054	4.57311	3.24221	5.55618	0.229538	1.65035	3.62968	4.42014	3.36081	3.18408	3.34395	3.39784	3.70476	3.47001	2.95399	3.1366	2.95591	4.14259	3.75618
NM_033010	57060	PCBP4	poly(rC) binding protein 4	8.44099	49.3096	18.8403	18.6531	26.5275	20.2136	35.0018	23.1782	22.1188	24.367	20.7305	21.7868	17.2088	14.6241	15.7381	30.7514	41.0525	14.4813	22.2769	21.7822	20.1523	24.7139	32.4725	23.267	20.6266	22.4839	18.8777	32.8698	23.0596	25.521	34.0517	10.5047	9.49112	15.8596	17.4265	16.2023	14.2525	15.4087	15.1105	25.8859	35.327	29.1433	22.2292	20.8047	18.937	8.34746
NM_001127692	5095	PCCA	propionyl CoA carboxylase, alpha polypeptide	6.31776	10.9277	3.10341	7.22691	4.48896	3.43399	17.5516	11.8174	12.0807	4.30908	5.13274	10.0821	6.63541	0.001906	3.0248	3.72281	0.015572	3.22812	3.44322	5.97147	3.08554	0.047799	6.73632	3.7944	4.68566	4.41556	5.149	5.06817	6.07309	6.26119	5.98841	7.8111	7.47861	6.48907	7.88603	7.40113	8.8636	7.4311	14.357	3.63937	6.12615	7.50756	7.29189	5.6023	1.03327	4.29154
NM_203487	5101	PCDH9	protocadherin 9	1.08614	4.38907	4.24023	10.9398	15.4032	13.4009	0.694779	1.78202	2.20503	1.15714	1.86364	5.69229	1.04078	1.74738	2.24	0.000373	1.73064	1.84474	3.05353	2.55742	0.634333	3.18876	7.37077	5.39743	2.58632	1.58193	3.9284	0.687764	0.666967	0.000355	2.9566	7.1913	1.44939	0.000418	1.0488	0.639391	4.42762	3.18092	3.31311	2.27811	3.63104	2.82934	1.63782	2.55925	0.000378	3.15183
NM_018907	56144	PCDHA4	protocadherin alpha 4	4.30182	5.6731	5.20949	0.034781	0	0.491195	4.26447	5.40632	4.97194	7.29976	9.0715	7.7601	5.12082	4.78069	4.52556	5.97782	6.20265	8.72739	2.95785	2.94839	3.13444	4.33418	4.99265	4.03422	2.86786	2.55116	2.06393	6.63434	5.20652	6.24854	9.44463	7.79409	9.33106	4.32325	4.5087	5.43168	3.66664	2.24076	3.06594	3.49044	4.66733	4.98392	4.60647	4.71199	4.53154	2.7669
NM_018913	56106	PCDHGA10	protocadherin gamma subfamily A, 10	3.33821	3.16847	2.02505	0.284252	0	0	5.8506	3.91825	5.81266	6.2946	6.32457	5.35604	0	0	0.484193	2.08913	2.14503	1.0303	4.72111	4.50533	1.77412	7.14685	6.72923	3.85203	0.552786	0.00077	1e-06	2.14081	1.73808	1.43706	0.630811	0.673079	1.60381	3.30699	5.51598	4.06883	0.91826	3.20932	0.883377	5.98544	5.09966	5.51423	5.41166	3.93241	3.30193	5.45271
NM_003736	8641	PCDHGB4	protocadherin gamma subfamily B, 4	10.2659	2.67385	1.99108	0	0	0.022151	8.63833	5.77444	9.24311	2.57465	2.31298	0.964383	6.26256	5.03211	2.28414	0.047062	0.472865	0.453349	2.42429	3.17659	1.99915	2.13227	1.115	1.6137	0.03232	0.938335	0.696086	0.962537	0.414414	0.327503	1.46042	0	0.416512	2.39289	5.35305	5.97817	4.34547	3.97723	3.34413	7.70902	5.18258	6.76503	2.58955	3.98733	3.74387	5.73543
NM_006198	5121	PCP4	Purkinje cell protein 4	6.25181	3.0213	18.1592	9.82925	7.25075	6.08621	2.09948	2.50254	2.93715	6.42781	11.2415	10.9157	15.0441	8.66634	13.8062	24.0141	21.5772	33.1011	21.6402	30.0535	18.2755	23.1309	31.3438	19.2777	40.5546	34.6347	50.0846	25.3667	21.2053	14.289	9.59384	10.6079	19.5113	7.25272	5.68914	4.68198	22.2854	19.635	18.781	12.6383	10.8453	6.49585	41.5952	50.0314	51.9979	5.59865
NM_013232	10016	PDCD6	programmed cell death 6	17.946	8.62837	23.9169	23.0899	16.0578	27.4502	13.4262	2.88275	9.99589	16.1803	8.00571	3.63955	28.7815	31.1678	31.8114	7.6966	9.82624	0.453021	22.166	27.0817	24.0254	14.204	11.4653	4.11823	15.6655	6.91501	21.6646	4.82271	17.1183	13.9481	16.0119	18.4966	21.4182	14.7892	38.8375	20.8455	11.4818	13.0212	22.8377	22.3074	19.1821	17.293	3.35472	16.8328	34.3762	17.4739
NM_001003683	5136	PDE1A	phosphodiesterase 1A, calmodulin-dependent	1.15881	3.00319	1.24297	3.57658	3.23545	3.01126	0.096663	0	0.201969	1.99303	1.36546	2.11336	1.06421	1.65836	1.25534	0	0.000266	0	0.753484	1.65629	0.700907	0.363605	1.07449	1.44724	0.244997	0.106542	0.016197	0.205827	0.523405	1.06867	1.09925	3.41409	2.30961	5.0824	4.6415	4.16857	8.05006	5.54175	7.33444	1.16854	0.334317	1.48695	1.19408	0.076298	0.121268	0.026218
NM_001001567	5152	PDE9A	phosphodiesterase 9A	5.6267	2.13014	4.80759	3.74544	3.3463	4.48534	1.15551	3.11805	2.92636	3.56076	2.63379	3.3e-05	2.22988	3.49814	3.1356	2.04604	1.78703	4.51089	3.88728	2.60809	1.53005	2.79248	1.5123	2.17807	1.94155	3.67172	3.42261	2.40151	1.0338	2.98179	4.21983	2.6819	2.65797	2.09667	5.28139	4.07871	1.88206	1.05589	1.21144	5.87728	4.19391	3.22315	3.93702	2.94567	2.96936	3.37661
NM_015027	23042	PDXDC1	pyridoxal-dependent decarboxylase domain containing 1	12.7608	2.95166	9.80966	5.46028	8.34317	6.70957	5.81787	9.13426	10.8489	2.32475	3.09681	3.90565	14.2872	9.47231	10.0419	0.004991	2.31469	5.01427	8.71049	7.40296	7.26782	9.44965	5.22947	10.0057	7.66595	2.67176	7.30635	1.24113	2.72332	4.63422	10.4307	12.0608	7.90454	7.62692	8.43678	1.95616	6.75353	2.9205	3.94913	6.39886	8.07786	4.17279	3.89426	9.41723	8.18786	12.8661
NM_001135690	5179	PENK	proenkephalin	2.86351	3.42621	9.79195	3.88026	2.96582	3.54209	0.176284	0	0.049132	3.85232	4.17281	1.76276	2.71545	3.53332	3.79251	4.40457	5.75905	3.86588	3.33155	2.36677	3.24494	4.45967	4.22848	2.59791	10.4391	4.74495	10.6487	10.9854	14.5662	8.87331	0.587512	2.76859	2.15151	0.563534	5.06909	2.54529	1.1223	2.51325	2.07524	9.65949	11.718	10.9878	3.41324	4.02141	2.96285	5.87817
NM_000318	5828	PEX2	peroxisomal biogenesis factor 2	6.91872	7.04325	8.8691	1.31939	0.013117	1.00642	5.46876	5.89565	6.18316	2.97325	2.8724	3.65131	6.61132	7.49079	5.88716	3.44766	2.45429	6.55625	6.22313	6.2513	6.67765	7.65014	4.07459	7.27465	1.894	5.51765	7.64815	4.446	1.17241	4.2551	5.73876	7.43688	5.17466	5.12435	3.74955	3.08119	2.77863	2.49523	5.0465	5.71548	5.93728	6.02265	7.02824	7.30766	7.69099	8.78446
NM_002632	5228	PGF	placental growth factor	2.09782	2.53284	3.75848	0.181485	0.952392	0.103566	3.29636	2.16572	2.80351	1.73324	1.48164	0.623978	0.283583	1.0076	3.13973	1.73493	0.704112	1.47346	3.465	1.56724	3.09941	2.01734	2.26894	3.71794	0.000588	1.66089	1.07748	0.911172	2.74464	1.32804	2.24042	0.053291	2.96665	1.43468	2.24331	1.96032	2.21629	1.80759	2.8083	3.88438	2.38522	1.24183	4.25255	4.10921	4.48882	1.5052
NM_001199506	116154	PHACTR3	phosphatase and actin regulator 3	2.88065	3.57279	1.6159	10.1398	8.29607	3.08953	0.495973	0.070078	0.000637	2.19634	1.32906	2.54119	2.64879	1.77691	2.35525	0.922149	0.789817	1.43953	0.003597	1.93399	1.77795	2.47607	2.88445	2.45432	0.002607	2.56399	3.08843	2.72635	1.22076	2.05358	6.22401	4.85472	4.16578	7.74725	12.2721	10.8122	10.0005	6.73775	6.86957	3.93017	2.63354	3.44685	1.91868	1.53968	1.20617	0.000605
NM_001127358	57157	PHTF2	putative homeodomain transcription factor 2	5.30213	4.50408	4.94686	5.50049	5.444	4.78124	4.59494	6.1504	6.0427	2.41725	2.63903	3.4683	6.8303	6.412	6.24544	2.00206	0.000427	5.16568	5.94295	5.46786	2.17868	5.82812	3.19943	3.92047	4.82462	4.1114	3.99762	1.89525	2.23753	1.75394	4.75525	5.62479	5.40456	2.96798	5.18785	2.54813	5.08913	3.76744	4.40454	3.63053	2.9142	4.79907	4.13696	4.67041	3.00817	7.14248
NM_001100877	254295	PHYHD1	phytanoyl-CoA dioxygenase domain containing 1	3.78521	1.83214	2.33905	0.210028	0	0.128833	4.11668	4.17973	3.66721	1.18857	1.36632	1.2032	3.00507	3.97892	4.08641	2.77716	1.5698	1.37408	2.0366	2.07734	2.39521	4.51761	3.82782	2.24657	3.10171	1.67999	1.18927	1.67762	1.37366	1.4737	1.48415	0.393663	0.975766	1.08444	2.54655	1.93112	0.236203	0.119648	0.399044	1.11505	2.15563	1.6934	3.0402	4.89117	4.1209	8.05111
NM_181643	128344	PIFO	primary cilia formation	8.77318	5.58797	21.5919	1.49723	1.22022	1.64329	2.48115	3.80838	2.88585	3.51305	4.40952	3.33356	30.8728	23.1038	23.5627	27.0539	23.1028	40.9148	14.9206	16.7173	14.6311	20.2029	23.3337	11.3814	50.6079	37.0074	47.4763	27.5388	26.9529	19.1296	9.79273	7.39288	10.562	4.4658	2.53106	2.04707	3.42508	3.00277	3.26745	10.4721	8.74013	6.17837	29.8915	32.5802	31.7128	12.6209
NM_012399	23760	PITPNB	phosphatidylinositol transfer protein, beta	4.98973	6.16132	11.0922	3.33401	3.57737	4.07822	3.04107	5.61083	4.89172	4.94286	0.005366	4.28595	6.05423	6.9593	7.35544	0.003792	2.56973	1.91178	3.73381	5.47333	5.80253	9.60745	8.98603	7.32567	1.3199	1.53411	3.49532	0.003938	1.35571	5.02177	6.43701	7.22483	7.08311	7.30928	6.84752	4.96552	5.75877	5.09634	3.27262	3.093	7.80113	7.85332	2.80655	6.5078	5.05717	7.02877
NM_001204398	5308	PITX2	paired-like homeodomain 2	31.0839	13.5526	9.41458	0.26403	0.156712	0	7.18979	7.27697	9.25849	9.80766	6.11052	6.98454	35.9343	30.4993	21.081	3.65926	5.18065	7.4139	17.4175	14.9466	12.7663	28.8296	14.9073	14.5011	9.93048	2.07134	6.52146	7.4055	3.40418	1.8787	4.89953	3.21032	1.74818	14.92	15.3527	10.0579	0.994333	0.434165	0.365474	6.0637	8.49891	14.9219	17.6455	27.7671	22.3371	49.049
NM_001009944	5310	PKD1	polycystic kidney disease 1 (autosomal dominant)	1.61521	4.76247	3.08603	8.66378	8.19898	10.2782	5.57745	4.22627	4.62873	7.83799	4.9894	3.72508	7.13724	6.49599	5.98457	6.97275	3.40964	3.52238	5.52156	6.66933	10.1012	5.49131	5.46925	4.25656	5.30086	4.78585	3.70838	1.37392	1.4659	8.75691	9.30223	8.98855	6.65264	5.62777	6.17835	7.92918	7.58774	12.9421	8.4791	6.72395	6.3494	6.79302	2.91823	2.7549	3.80559	3.88632
NM_001080953	5325	PLAGL1	pleiomorphic adenoma gene-like 1	5.34672	1.59874	2.32136	0	0.309289	0.57506	3.04748	1.56253	3.21923	0.060441	1.97279	1.1408	2.78476	4.21331	2.20126	1.03537	0	1.18716	2.63839	3.63849	3.09796	2.69463	0.534466	3.8834	1.61132	1.1377	2.9e-05	0.825651	0.969609	1.20159	0.660539	0.668897	0.418931	2.13585	2.06194	1.46938	1.16877	1.05348	0.477117	0.491894	0.686944	0.823763	0.831465	1.13696	3.49994	6.09465
NM_015184	23228	PLCL2	phospholipase C-like 2	4.20387	3.76294	4.15245	5.39561	5.86457	1.53008	4.96358	5.02625	3.53539	2.59296	2.63828	4.31414	2.86928	1.47196	2.34457	0.563282	1.53192	2.31711	2.74758	2.25144	4.23637	3.66224	6.83242	6.10849	4.17033	4.29989	5.03545	1.48171	1.6521	2.21197	1.37565	8.98727	8.29837	6.01801	5.60648	4.96125	7.6561	4.76553	6.40702	4.9681	4.59896	2.93497	3.8233	2.21511	1.43551	1.43297
NM_020360	57048	PLSCR3	phospholipid scramblase 3	2.38672	2.65096	4.04514	0.537695	1.04875	1.95554	2.00387	1.4767	2.91019	1.8049	2.89985	2.15597	3.71477	5.62544	6.47924	5.32615	3.42243	3.95902	3.31508	2.0278	2.07079	4.5378	3.30302	1.36549	1.58242	2.68734	2.22501	2.44904	2.31038	3.96218	2.11677	1.30467	2.0065	2.48037	3.0984	0.001278	1.23208	2.18247	0.89525	2.70417	2.99979	3.22657	2.547	3.50635	4.09362	3.8104
NM_005397	5420	PODXL	podocalyxin-like	40.7721	10.2298	24.3292	4.80634	5.79195	4.73525	32.189	29.3902	34.2718	17.2998	12.6972	15.0696	43.0339	39.2604	33.6881	7.46669	13.0012	28.0308	31.7585	24.3931	21.2766	39.3495	19.1246	29.6705	7.51698	4.8145	6.99166	5.35497	4.50869	3.87597	20.4795	9.4849	18.8047	29.546	35.0562	16.6655	4.92597	4.39963	1.6906	22.38	30.7918	39.3837	34.1451	39.6607	37.7392	130.703
NM_013274	27343	POLL	polymerase (DNA directed), lambda	2.04904	1.04952	3.79096	0.00786	0.450766	2.59872	1.62912	1.50228	3.18046	3.06714	1.41687	3.33816	1.49688	3.28687	1.68623	3.95331	3.69536	3.68416	3.38446	2.81383	1.94579	2.13296	0.243273	3.82709	1.92039	2.55689	0.99159	3.19532	2.9506	1.08899	2.1331	1.62768	2.18252	0.414518	0.000292	2.2889	1.96782	4.88733	0.001972	0.115173	0.001413	1.86704	0.396164	1.56001	2.38806	2.3904
NM_001143788	51535	PPHLN1	periphilin 1	8.0332	4.94078	6.51049	6.06377	4.69468	5.30598	5.55357	5.5638	5.02337	2.21701	3.03977	5.05604	2.9601	3.97368	7.13253	2.07014	0	2.62268	2.73946	4.06543	4.71758	4.65911	5.0729	6.83279	0.008686	2.50642	3.66831	3.41215	2.60028	3.50796	7.79512	8.79049	8.07131	3.43691	5.54301	1.16596	6.43119	6.32733	5.38759	3.26938	8.82457	0.287352	2.98615	2.83625	4.4928	2.19448
NM_002706	5495	PPM1B	protein phosphatase, Mg2+/Mn2+ dependent, 1B	4.95858	8.09199	6.45017	6.76899	7.3537	7.90169	4.12497	5.58678	4.68742	3.66317	0.059249	4.06558	6.56411	4.67173	5.7583	0.015384	1.57575	1.06076	4.28405	5.43838	4.12479	6.11758	4.86817	7.12598	5.08954	4.62124	5.12089	3.04469	1.99866	3.50876	6.62452	10.6421	10.0774	5.32485	4.63946	3.90385	6.93595	4.97329	4.72181	4.69205	5.74287	5.25728	7.26359	6.18208	6.0311	3.50352
NM_006658	10842	PPP1R17	protein phosphatase 1, regulatory subunit 17	2.10414	2.18559	4.68257	1.71585	1.84721	1.85153	0.956171	3.1e-05	0.703013	1.05819	0.928963	1.23365	1.3912	0.758381	1.21692	0.419493	0.584175	1.06998	1.68205	1.79802	2.16651	1.65724	1.98344	3.1266	3.68729	2.09773	2.8637	1.08833	0.985138	0.805835	3.9192	4.99236	4.5064	3.53999	3.39936	4.42582	0.815875	0.982856	1.14107	1.505	2.0991	2.27609	0.842371	0.743322	0.871494	0.180984
NM_001291310	55844	PPP2R2D	serine/threonine-protein phosphatase 2A 55 kDa regulatory subunit B delta isoform isoform b	5.36617	4.65368	1.9387	7.00771	6.62975	6.37969	0.242849	4.73724	0.197953	0.119286	0.128488	4.18553	4.1798	3.48607	4.5417	0.138078	0.149085	0.131836	3.89798	3.95247	0.12964	3.89771	0.488501	4.67284	6.68496	5.09868	0.139192	3.56176	0.139327	0.105874	7.06496	6.80495	0.147871	4.16646	0.106575	4.72796	5.06843	4.07948	2.86154	0.121226	5.11453	4.83222	3.73539	3.73634	3.80643	3.51587
NM_001164161	55291	PPP6R3	protein phosphatase 6, regulatory subunit 3	11.1783	11.6697	11.3558	2.08808	0.000429	0.035277	9.95114	10.0849	8.95117	5.38591	6.62816	4.37872	9.43345	6.44877	8.0851	4.59615	1.43678	9.80696	7.79562	7.32018	7.07024	8.60988	5.22811	7.0029	7.71442	4.70325	7.23176	1.41971	5.15006	2.56575	9.22673	6.37784	7.42201	11.6261	10.1316	6.63609	5.92882	3.41277	4.0853	6.11988	8.90303	10.5004	8.27191	13.4428	9.66006	14.5609
NM_153026	144165	PRICKLE1	prickle homolog 1 (Drosophila)	4.04453	4.86021	7.13021	0.585572	0.26245	1.86692	3.31059	2.38118	3.56915	1.58066	1.53131	1.70924	7.16221	4.65818	5.73788	1.4061	1.82513	0.500682	3.25464	3.24299	2.42466	5.36481	0.699085	5.59453	1.85726	0.260796	1.95346	1.89134	1.08979	1.38074	0.779386	1.55806	0.805536	0.54934	2.20061	0.744951	0.777894	0.473525	0.945739	1.92527	3.29013	4.17557	2.98555	3.57339	3.05743	7.63779
NM_001145848	8842	PROM1	prominin 1	2.70761	0.588772	6.5045	1.25684	0.588883	0.982605	5.4089	8.26797	5.83588	0.08147	0.616379	1.44697	4.20735	3.63618	4.70061	3.79781	2.17602	4.65869	5.06222	5.28959	4.9835	12.9664	11.6158	7.1562	23.7029	22.1765	28.1409	1.47434	1.86368	2.3267	3.59883	2.58207	4.4453	2.57656	3.83338	1.56556	2.4702	2.60468	2.93424	3.45437	3.13381	3.12709	8.20405	7.2955	4.94264	8.65423
NM_007244	11272	PRR4	proline rich 4 (lacrimal)	4.92352	2.84619	3.71506	3.92382	5.24258	3.18994	1.36475	1.2468	1.61876	0.287379	1.72674	1.61035	5.3e-05	1.54723	1.06452	1.56123	1.25847	2.31034	2.74242	4.81242	3.80528	2.19373	3.08168	2.15205	2.48459	3.91149	1.89645	2.73172	0.798209	1.72059	4.5205	5.42729	5.21571	4e-06	0.044196	0.006334	4.64238	1.02935	1.72779	0.088518	2.55328	1.44222	2.80192	1.0278	2.82869	0.766532
NM_001017528	55615	PRR5	proline rich 5 (renal)	2.93943	1.10659	2.86999	1.89139	1.55686	2.92584	5.13788	0.025501	4.12962	0.000217	1.84506	0.380389	5.89724	6.66625	5.87549	0.819073	4.18446	1.12483	1.24224	3.782	1.58558	2.47173	3.57401	0.01759	3.76076	0.858242	0.85788	0.010714	0.004496	1.19088	4.55915	2.31088	0.765765	0.012496	1.74274	0.060223	1.76862	1.94292	1.45302	2.93823	0.002792	1.83841	1.84954	2.55808	1.36334	0.001593
NM_001293180	11098	PRSS23	serine protease 23 isoform c precursor	4.745	6.61335	6.39407	2.71762	3.04784	1.83986	11.8218	10.221	9.04853	2.70341	3.28758	3.76835	3.95048	2.70792	1.07215	5.20422	6.61246	11.4109	4.79107	2.47977	2.98858	4.34728	4.67334	5.11207	4.28755	3.25234	2.72358	2.63822	1.87178	1.89079	0.039716	2.9508	1.09211	5.59542	4.11692	3.0135	1.10716	0.417474	1.74805	3.18641	3.52555	5.89873	3.01908	4.78744	3.30467	3.31217
NM_153362	167681	PRSS35	protease, serine, 35	12.6425	8.90207	10.9698	0.443984	0.657594	0.441011	7.27359	7.46308	6.21905	2.91919	1.24219	2.65999	17.6993	13.7466	11.1496	1.87859	0.579298	7.25594	8.24021	6.76514	5.49861	14.0561	5.7423	9.21189	2.72821	1.22007	2.21429	2.75256	1.79356	2.28081	2.93607	2.5611	3.23097	9.95442	10.4577	4.76748	0.950802	1.23617	0.792592	4.50824	5.05329	8.05065	8.81766	11.6059	9.31983	32.3661
NM_001128217	11168	PSIP1	PC4 and SFRS1 interacting protein 1	32.0294	32.0939	38.7322	20.7373	21.737	15.6883	26.2736	28.0879	25.8449	17.8653	16.5913	23.4416	20.3777	24.7851	26.7828	9.46063	8.40691	10.0001	22.1995	23.9854	21.0662	25.1034	22.0023	31.627	20.4291	4.71771	19.6215	13.6157	12.0992	2.04693	28.2898	32.7331	28.5773	25.46	24.6172	19.3328	34.7422	13.2607	22.3152	20.2221	22.574	20.1633	22.7988	21.7199	20.0816	15.5914
NM_002801	5699	PSMB10	proteasome (prosome, macropain) subunit, beta type, 10	5.55838	7.49022	6.15053	7.09021	5.78009	6.45256	8.00921	6.47145	7.11199	7.32292	9.46023	5.60711	8.95519	10.6224	11.3627	13.5739	13.5352	4.1148	8.4936	9.1453	8.59488	10.4875	10.8509	7.0842	6.74711	6.13834	6.67346	11.0932	12.5696	10.3307	6.92866	4.43943	6.2421	7.58256	6.56103	5.79164	5.7311	4.73124	6.96811	8.08821	9.23824	7.12743	9.5761	12.3468	11.8495	9.96073
NM_016556	29893	PSMC3IP	PSMC3 interacting protein	3.8957	2.12276	5.99831	3.54987	3.48957	4.48261	2.7011	1.61668	2.64268	2.09165	0.001379	2.65803	5.45798	2.81721	4.6361	2.31541	0.00707	1e-06	2.11314	0.969777	4.19528	3.73843	1.91346	2.16136	1.57845	0.743629	2.72525	1.55948	0.001264	1.72204	4.27221	3.13344	6.16446	4.4046	3.99464	0.596046	4.12544	1.78777	4.6631	0.926791	4.45034	2.23449	2.00274	4.34642	4.34594	3.82054
NM_024754	79810	PTCD2	pentatricopeptide repeat domain 2	3.39193	2.86424	2.23038	2.8012	1.9454	1.40221	2.11396	1.18742	3.07908	1.81286	2.14467	2.35655	2.65695	2.91036	3.61336	0.834309	1.58828	2.97962	1.70616	2.59305	1.06289	2.36647	3.1706	3.09029	1.78026	1.35765	2.02926	1.743	0	1.8935	1.77115	2.55328	1.89483	2.88017	2.8606	1.52167	2.58552	1.68688	1.40161	2.01332	2.42291	1.4502	1.90526	2.76083	3.4845	3.62298
NM_173176	2185	PTK2B	protein tyrosine kinase 2 beta	4.01948	0.00096	3.06658	0.401759	0.935257	1.01317	8.24768	6.47814	7.13481	1.44437	2.41535	1.43394	9.92333	9.99194	10.0765	12.5736	11.2146	8.75458	8.38777	4.44834	9.40581	6.63912	2.76819	4.03791	9.78781	9.88476	8.62468	3.50472	3.58037	3.59561	2.54663	0.000641	0.000366	4.29497	0.013047	6.06677	2.53949	1.68649	1.11062	0.009622	5.84282	3.86583	9.10076	4.20992	6.98502	22.379
NM_001270398	5754	PTK7	protein tyrosine kinase 7	35.5285	23.4227	12.6795	9.31431	9.82615	4.147	26.3975	31.9023	29.6222	23.6554	21.6962	23.1322	37.908	33.5116	28.7563	25.5792	38.8138	23.4495	27.1046	24.0482	19.5892	52.3336	32.0216	26.3636	29.5791	20.0515	18.7699	19.502	17.3643	14.9706	5.50945	0.035749	3.88031	14.9224	26.0107	21.7213	11.3747	12.7331	8.80265	13.2024	27.5346	27.4508	29.301	37.6253	30.1702	63.2854
NM_006906	84867	PTPN5	protein tyrosine phosphatase, non-receptor type 5 (striatum-enriched)	1.96776	3.28572	0.620841	6.55091	8.74871	9.09331	1.23996	0.662808	0.000555	2.0042	2.71717	3.17529	2.0067	2.5933	2.97566	4.02262	2.7499	0.003063	2.26729	4.13672	3.54829	1.51457	1.19057	0.718696	0.876371	2.72999	1.55418	0.613967	1.90297	0.834876	3.27248	1.65393	4.01359	1.6314	1.72025	2.35377	2.13861	2.18229	1.93425	1.88375	1.67103	2.52595	1.88976	0.85135	0.457272	0.600917
NM_002844	5796	PTPRK	protein tyrosine phosphatase, receptor type, K	7.76602	4.08781	9.85478	1.07326	0.000388	0	6.83355	8.24732	8.05701	3.29386	1.30316	0.000637	9.97565	6.91491	7.52835	2.11674	1.37629	3.607	6.75415	5.17534	5.44652	8.4211	5.7729	8.62181	3.14028	2.95271	5.17687	1.60831	1.70463	2.68393	3.72889	4.65304	2.53464	4.14234	3.76289	0.52033	1.80679	1.44458	1.36219	2.42905	5.25648	3.795	8.47988	8.23348	5.71525	12.9025
NM_002847	5799	PTPRN2	protein tyrosine phosphatase, receptor type, N polypeptide 2	0.000959	0.278223	0.106162	9.88071	10.983	12.7926	0.001219	0.750723	0.915845	8.48965	12.3575	3.52015	2.02826	4.56041	2.93852	5.02933	5.68886	3.07214	2.16005	2.8037	4.56231	3.81619	8.39613	3.03776	6.48439	6.02328	4.23735	5.01537	5.8957	2.15896	5.39518	0.419451	7.13444	0.742062	1.06983	3.42148	2.90418	1.5942	5.74567	1.97939	1.48038	3.38932	0.451987	3.89538	3.27888	0.707479
NM_002852	5806	PTX3	pentraxin 3, long	4.01728	19.0576	9.22941	6.89874	5.84	4.89535	0.777001	0.781063	0.779053	7.42749	10.4149	10.4206	8.27323	6.25539	6.46667	2.17805	2.097	3.00705	5.26583	5.95911	3.65605	4.12892	3.16019	4.04485	3.10216	2.67833	3.6426	5.29837	4.5586	5.06521	6.79394	6.20395	4.60133	2.94605	3.20938	3.49973	3.43613	2.47745	2.74307	3.33709	4.49779	4.41479	2.96919	2.99055	3.36972	1.76497
NM_078480	22827	PUF60	poly-U binding splicing factor 60KDa	3.1068	23.9402	16.166	19.8564	15.4857	20.3394	7.5985	16.0449	12.3477	10.8775	24.715	14.3958	27.4689	19.5475	22.7753	30.8174	21.042	19.8356	20.1192	13.2708	21.1885	30.5073	12.8073	9.6563	20.1038	2.38656	24.0997	17.5807	25.1689	8.96612	22.6132	12.1237	12.8827	44.1144	47.1636	42.4808	11.8982	17.8344	8.53648	25.4038	36.9103	18.7005	24.3462	15.916	9.07104	2.82251
NM_001256278	83871	RAB34	RAB34, member RAS oncogene family	12.0944	8.2203	7.43484	1.52318	0.010791	1.28516	8.19039	13.9741	11.7841	7.14047	11.2605	6.4512	7.88423	5.56161	9.73303	12.9518	16.4348	9.81874	9.53265	6.41642	8.78264	11.0121	4.35748	8.13979	10.174	11.9984	9.75225	12.2525	15.0082	6.1683	5.67909	0.000262	2.17757	10.8851	14.3679	8.30272	2.67287	1.75157	2.28377	5.1534	7.38638	9.60514	9.41691	10.792	11.9761	17.94
NM_002868	5869	RAB5B	RAB5B, member RAS oncogene family	9.2521	17.0905	14.9661	6.41064	11.4623	7.29867	20.5275	5.33999	12.2424	16.1965	16.7163	12.6011	11.083	15.2145	8.38693	15.7872	17.8665	16.6765	18.937	7.6441	4.71956	6.3954	16.5369	3.1087	12.5983	13.385	11.184	6.11779	13.7431	11.902	16.0422	11.7065	15.2261	6.94585	7.42104	12.7205	5.9862	7.9369	6.29431	17.5916	3.72337	18.1337	10.8651	14.0691	16.8532	12.4496
NM_001174152	10244	RABEPK	Rab9 effector protein with kelch motifs	5.91125	6.91045	5.85787	4.93465	6.36393	4.72345	1.50848	2.70324	3.34258	4.07868	6.36208	5.34152	5.76821	5.43968	6.25541	2.56363	3.99171	4.91151	3.97696	5.1932	5.45254	4.93058	6.53457	5.19827	5.38262	3.48508	1.42186	5.95718	3.9723	0.896719	5.92623	4.71419	5.60981	7.1769	8.07555	9.87487	4.71167	4.09025	6.85639	6.95454	8.31469	5.25775	6.45509	7.36142	8.7736	9.17292
NM_001145658	5909	RAP1GAP	RAP1 GTPase activating protein	2.68638	1.11774	2.42791	3.02195	1.90754	2.98717	2.36759	3.13816	3.44929	3.34531	1.21882	0.80034	2.99363	3.42458	2.16086	2.35414	3.17348	2.22193	2.33133	0.021177	1.05155	0.034385	0.09807	2.87112	3.37533	1.02224	2.95806	2.71289	0.00152	3.02303	2.17014	3.44854	0.000858	4.98201	4.8032	6.07093	4.83695	1.32035	0.006238	4.29118	2.3409	3.0303	2.09631	1.55921	2.08302	1.17679
NM_001164748	11228	RASSF8	Ras association (RalGDS/AF-6) domain family (N-terminal) member 8	6.22788	6.22202	6.6055	1.28559	1.89654	0.899582	3.38904	4.67586	1.98078	1.80919	0.847343	2.97937	4.15068	4.98293	4.02306	1.55925	0.000766	2.65829	5.97912	4.42167	3.58045	9.92718	3.68246	4.69419	7.32142	4.61367	6.23331	2.50759	2.32485	2.7124	4.56556	4.84151	5.77968	1.90607	2.27789	2.49631	3.52704	0.636058	1.99669	4.46121	3.1815	3.36064	10.4868	6.97421	7.80642	4.41522
NM_006743	5935	RBM3	RNA binding motif (RNP1, RRM) protein 3	4.48595	32.2418	12.8612	9.88864	10.0538	8.70255	2.92519	3.10285	2.65945	8.05533	10.6864	5.356	12.4902	12.7076	11.3002	4.61763	3.47718	5.216	9.25811	8.55239	6.24294	10.3518	7.91762	6.38076	4.04745	2.84649	3.27737	3.72297	2.73586	2.73298	6.5114	6.61309	4.53262	20.2461	22.0429	18.2755	5.36786	5.58456	4.74887	17.4484	18.1816	22.564	12.2245	12.395	13.2024	9.50774
NM_014483	27303	RBMS3	RNA binding motif, single stranded interacting protein 3	4.90225	1.6882	3.92438	3.1432	3.17541	3.34698	2.19346	2.83718	2.03767	2.08593	0	1.52531	4.18611	3.30007	3.22985	0.582815	1.35313	2.9041	1.64763	1.48518	1.06157	4.96001	2.61435	1.48227	2.10233	1.89254	3.58547	0.667391	0.237961	0.322736	1.12761	1.31778	1.70104	0.043247	0.445593	0.20015	1.06602	0.752668	0.843708	1.32489	1.88038	1.48575	1.49344	2.50172	0.916645	2.51164
NM_004164	5948	RBP2	retinol binding protein 2, cellular	6.54548	9.7205	3.50698	0	0.167113	0.093151	3.80163	3.83231	3.7357	1.42491	1.29018	5.42749	1.60358	0.893417	1.72001	0.496974	1.32836	1.0998	5.68337	2.63404	3.00017	2.76245	7.41284	3.55579	3.68141	0.301593	1.92744	1.65516	1.36147	0.707911	2.19723	3.0946	3.28506	1.67468	0.793631	1.26859	4.55591	3.4719	10.1016	2.79028	2.50955	6.7585	2.78337	4.24797	4.38697	0.618014
NM_006744	5950	RBP4	retinol binding protein 4, plasma	3.98397	2.22669	3.22148	0.79175	0.74491	0.959293	8.63291	9.57357	12.8705	5.34529	7.01687	7.30923	4.93068	3.74502	12.8027	1.45056	4.74905	3.60521	11.5547	5.20613	10.6926	15.7601	10.5659	11.1425	1.30948	0.137855	0.44208	2.54432	8.78548	1.37957	21.2724	15.2111	18.2467	11.6006	6.80975	5.13247	0.663991	0.426478	0.891014	6.3657	6.06627	21.3892	5.00772	2.22789	4.83202	2.37813
NM_015874	3516	RBPJ	recombination signal binding protein for immunoglobulin kappa J region	6.66718	10.064	7.73645	4.58196	4.78176	7.25403	5.66779	7.22464	4.97811	4.85455	2.01888	6.39637	5.53369	6.42138	6.75298	3.17502	0.000987	3.71918	6.82663	9.50181	8.7807	3.31583	7.91947	2.76456	5.63645	7.64584	6.79737	3.96301	1.56695	0.52064	7.59281	11.5642	12.3296	6.89684	5.94121	5.66992	9.23931	9.0289	6.67357	4.40123	10.0085	4.78702	8.70456	8.03758	5.02945	2.96675
NM_001302378	64145	RBSN	rabenosyn, RAB effector	2.10812	3.01537	1.15548	3.24448	4.91195	6.12424	0.804117	1.62454	0.30984	2.18435	2.59183	2.36629	3.84477	0.001818	3.89054	0.841967	0.739956	1.06617	3.65581	1.99178	3.70366	2.77386	2.16577	4.40776	0.00153	0.589757	1.20001	0.001263	0.345154	1.65436	2.4585	0.320023	2.41726	2.32105	4.40541	5.34496	1.38758	2.81366	2.32415	6.63656	1.52437	5.48389	1.43293	1.58052	4.55835	0.001208
NM_001285389	1827	RCAN1	regulator of calcineurin 1	0.982535	1.88528	3.21641	7.10069	7.53099	6.96024	1.37228	2.29806	1.22647	1.17729	0.983901	1.51855	2.97696	2.68409	1.80793	1.82539	0.630468	6.6025	2.41824	2.43848	1.39428	5.24845	2.88843	4.6178	3.37458	3.04744	4.84851	1.34492	0.810262	0.298552	1.71257	3.26479	6.3218	4.42882	3.53213	5.58222	3.69271	2.38753	0.88053	2.32323	2.57425	2.94	1.25972	3.12097	5.05173	2.10164
NM_001286831	1102	RCBTB2	regulator of chromosome condensation (RCC1) and BTB (POZ) domain containing protein 2	3.85752	1.94874	3.45408	6.34047	4.45844	4.88479	3.09933	3.3276	3.70483	3.32646	3.79006	4.68242	3.07173	3.4843	2.34127	0.039906	1.45556	2.5433	1.82074	2.78518	1.48819	2.8257	2.02246	4.35785	3.707	2.24362	3.49628	1.16466	1.82501	2.16877	4.56576	5.7598	6.51581	0.214499	0.96072	0.878427	2.9083	2.42287	2.48734	2.16388	1.67571	2.31711	2.83254	2.8368	2.27931	2.29729
NM_015436	25898	RCHY1	ring finger and CHY zinc finger domain containing 1, E3 ubiquitin protein ligase	2.12009	3.58103	3.79064	5.08331	5.29833	5.18426	2.5525	3.56852	3.47983	2.61926	2.55949	2.88735	3.32531	3.26008	3.47095	0.001386	1.53275	2.79877	2.97492	2.37671	2.99479	4.02165	4.0899	3.84493	3.04601	2.96295	3.30803	2.26157	2.07995	2.23833	3.81771	4.5565	4.20989	4.57712	3.75054	4.11233	3.59627	2.51344	2.72888	3.63458	4.2303	3.97533	2.73889	3.34143	3.33536	3.96435
NM_001164730	65055	REEP1	receptor accessory protein 1	5.14384	5.86937	3.71568	22.9458	22.8924	16.9232	2.12416	2.15735	2.64866	3.18163	7.76307	6.21769	5.75839	2.37146	6.64298	0.014383	2.87562	4.14828	4.16589	5.62281	3.27662	3.99091	5.70481	8.20295	3.69795	4.32411	8.41808	3.30144	5.31312	4.6651	5.57701	8.34802	10.9125	7.39375	8.15732	6.37106	9.59971	5.29772	8.99407	7.20394	11.49	7.42197	4.25509	3.40975	3.50979	2.26974
NM_173054	5649	RELN	reelin	8.39943	1.98358	10.7983	2.03849	2.10589	2.31097	7.09683	6.37277	5.23333	4.68547	1.94698	2.71611	3.52229	4.41747	3.58728	0.564961	1.14036	3.42	8.58324	10.0813	8.07132	10.9869	8.86111	9.65511	3.26506	3.06605	3.45767	1.47876	0.00623	1.50776	4.44402	2.47136	2.69597	3.76965	7.51704	2.91141	4.71566	2.32962	1.15274	9.26098	7.96766	11.6312	12.8502	8.61546	6.168	18.7792
NR_037713	117584	RFFL	ring finger and FYVE-like domain containing E3 ubiquitin protein ligase	2.31026	1.02764	3.40633	1.76609	4.37857	4.13169	3.43095	2.19694	5.23417	3.24073	2.79589	3.34748	3.39501	1.75242	2.76493	0.000505	3.60003	3.13693	3.88712	4.47271	4.16113	3.21379	3.6826	3.70229	3.92428	2.23841	3.24487	2.17352	2.7385	2.88526	5.66946	4.44995	5.70644	2.84778	5.08344	3.68825	4.11401	4.56918	1.58672	2.28645	3.04127	2.12041	2.71781	4.38924	4.09193	1.75249
NM_213594	5992	RFX4	regulatory factor X, 4 (influences HLA class II expression)	3.96283	3.01023	2.52671	4.03003	3.3613	3.80666	0	0	0.25806	4.91348	4.79987	3.58878	1.25631	2.12562	2.2772	1.59859	1.71466	2.31548	1.41227	2.80155	2.67802	2.55458	2.5659	4.22432	3.23787	0.992487	2.23623	1.36546	2.63915	1.52371	3.65258	4.57473	2.06352	2.04061	0.997318	1.53506	4.23659	2.12097	3.07245	3.83244	5.31717	5.66301	1.84317	0.656389	2.16357	0.451673
NM_001166286	56963	RGMA	repulsive guidance molecule family member a	5.43567	8.93239	0.552601	12.3155	13.9414	9.70328	0.617629	0.814843	0.49844	17.514	7.73547	14.4497	4.137	4.35821	8.52577	6.34391	6.31241	2.2255	7.31292	9.88056	7.80814	4.87669	4.0532	4.86442	7.58075	6.79763	5.9286	6.51921	8.01977	9.27051	14.6276	3.84047	0.055155	8.83079	14.0447	11.7209	10.1752	9.49751	4.25211	14.6458	8.27382	3.57686	5.49149	3.40649	5.92538	1.07607
NM_001039467	10287	RGS19	regulator of G-protein signaling 19	0.004164	1.9615	3.03742	2.31709	1.80688	1.2241	1.7386	1.77642	2.19065	2.02647	1.29368	0.691647	2.03317	2.19217	3.18076	1.15915	4.91062	3.57941	1.27254	2.25026	0.004355	3.32464	1.45315	1.56343	1.53239	0.589985	1.87194	2.41212	2.42995	2.78183	1.78448	0.906328	1.00076	2.04887	1.75581	0.017956	0.748401	0.830383	1.99175	0.001668	1.76671	1.69581	2.403	3.25013	1.69615	4.17088
NM_005613	5999	RGS4	regulator of G-protein signaling 4	18.1835	4.90034	16.3418	9.93944	7.132	6.0646	8.2133	6.71024	7.64958	4.06161	0.597034	1.87756	29.7718	25.2559	19.3885	0.001395	0.143543	1.63368	13.8479	7.71308	8.2043	13.5588	9.2447	12.99	3.08557	2.27621	3.27963	4.11485	1.32318	0.221523	5.10305	5.59712	3.6684	18.4338	17.9812	10.11	2.11974	1.25053	1.87482	7.48347	9.78781	10.9158	17.9798	16.1302	23.4498	32.5805
NM_001144956	284485	RIIAD1	regulatory subunit of type II PKA R-subunit (RIIa) domain containing 1	1.12325	2.70016	1.7542	0.74406	0.749882	0.33343	0.705451	1.07142	0.197787	1.5678	1.67284	0.790675	2.72335	3.22394	2.71471	7.99964	3.55402	1.09542	1.87345	4.00917	2.58858	2.92948	3.06305	2.11137	2.03662	2.70832	2.05853	4.74216	4.38955	2.94329	2.9005	3.38844	1.71127	3.74126	2.66479	4.12996	2.61713	1.76696	2.5364	2.99022	2.35803	2.17797	4.57659	5.21619	2.22866	0.662328
NM_002933	6035	RNASE1	ribonuclease, RNase A family, 1 (pancreatic)	12.1268	6.81503	10.354	0	0.133748	0	2.51929	0.450671	0.575198	3.57087	2.94615	2.07204	3.82926	7.99428	10.1108	1.69748	2.80049	1.28063	11.1023	5.53243	5.74932	15.5564	8.18926	5.17263	0.814487	0.321819	1.3402	4.47613	2.34713	1.79808	2.82118	1.7225	0.658251	1.28604	2.10725	0.948645	0	2.5e-05	1.66235	2.62069	5.55011	5.05949	19.061	11.4672	14.1008	10.3536
NM_001201365	9604	RNF14	ring finger protein 14	0.113818	4.32746	1.17882	4.76296	6.85248	6.30215	4.68147	2.34293	2.98781	2.48496	0.100619	1.91183	2.48698	1.29519	2.91819	0.947983	0.385374	1.65644	4.51091	3.56188	2.88345	2.63637	4.17993	0.024999	4.56925	3.68955	1.51338	2.4843	2.33696	1.49351	3.25501	3.40705	4.53427	2.99113	2.22247	0.600926	3.4425	3.63076	3.13861	0.107008	3.24058	2.96515	0.009695	1.93141	0.019821	1.95539
NM_144726	153830	RNF145	ring finger protein 145	9.79449	11.032	12.35	13.9771	10.6079	5.66328	8.28384	12.4822	11.0946	5.4357	4.51231	9.71924	14.6814	7.64044	8.21204	3.2365	0.011296	10.9439	9.66181	7.4148	5.58528	11.3068	11.4223	15.8727	12.2466	8.23516	14.4368	2.01796	3.20238	4.02253	10.5394	8.28368	11.8024	7.09164	9.44734	1.16411	8.47597	5.58466	2.23676	7.44279	9.07988	10.3066	12.4402	13.5105	12.1232	15.7854
NM_001242850	81847	RNF146	ring finger protein 146	7.19413	5.50187	6.88581	2.58577	3.6674	4.14336	4.88084	5.22281	3.63302	1.84112	0.620658	0.003116	2.44917	2.73544	2.95208	1.34454	1.17751	3.05616	1.74589	3.46571	1.69626	5.34913	4.98173	0.002459	1.09213	4.89876	0.781506	1.87986	0.614247	1.30792	3.86191	5.42557	6.6272	3.43765	3.5269	2.10953	7.68705	2.28742	5.10078	2.09027	4.98552	2.51457	2.66355	4.12695	5.02656	1.63612
NM_152737	221687	RNF182	ring finger protein 182	2.51566	1.88286	3.96218	3.55973	3.98131	1.52758	1.96591	3.25269	0.001947	0.398195	0.002145	0.002108	2.83595	2.71789	4.42372	3.15679	1.66558	8.07951	3.50066	4.95503	2.47172	0.002349	4.44186	2.39566	2.34303	4.18967	1.66168	3.08936	2.24707	4.56331	4.10703	3.54924	4.69889	1.22337	3.24204	1.00555	5.69088	0.002354	0.002478	2.00129	2.69355	3.71154	5.39991	3.35503	2.29334	0.002324
NM_207343	257160	RNF214	ring finger protein 214	3.49788	2.75984	3.04657	4.18405	2.61055	5.91578	3.50028	2.5483	2.99246	0.935124	1.96047	1.89793	2.52053	2.92404	4.40396	2.04363	0.000454	5.23689	4.01102	5.00136	3.98617	4.25793	3.30086	2.75296	1.08602	1.71284	2.31548	0.435715	1.93806	3.46965	3.70284	5.58245	0.808269	1.19626	3.86712	1.0213	2.36348	1.77981	2.11447	0.67269	5.01774	1.50237	3.67112	1.443	3.19187	1.08444
NR_023343	100151683	RNU4ATAC	RNA, U4atac small nuclear (U12-dependent splicing)	62.1299	59.7744	32.9639	28.6328	26.0961	18.5144	45.314	113.641	27.6545	41.8781	32.7438	72.2209	12.6776	64.8677	25.8589	38.6553	25.5506	23.7776	64.3598	89.412	46.903	43.0464	39	116.062	11.1215	0	43.7082	21.3238	52.3302	58.2237	28.7259	51.4382	48.1833	79.2868	58.0222	41.8826	66.0055	117.757	97.8195	43.4075	38.2192	42.3666	31.3423	58.8397	41.172	23.7935
NR_125392	101954268	RNVU1-20	n/a	2.88945	17.0159	19.6083	2.23684	2.13718	0	5.91603	3.17096	0	8.9912	7.52076	2.67533	20.1742	10.1612	5.94025	3.1465	2.15959	9.17204	6.38911	4.29528	7.08456	3.39505	3.23772	2.0438	2.97763	1.80289	5.91253	14.3367	2.80231	5.81521	5.57144	3.36291	10.1767	19.3619	7.47581	15.5836	2.4637	14.4307	2.97264	13.3731	9.39911	10.9335	9.68587	6.95589	4.75198	9.09969
NR_121645	101447996	RNVU1-8	n/a	6.79146	160.54	26.6019	23.3655	28.9977	38.616	31.1573	22.5443	8.73377	35.848	18.7026	11.7943	55.6318	55.3756	59.9315	7.17392	47.0531	27.1148	23.7294	10.2356	46.9364	47.4558	63.9671	33.4229	6.45783	6.24172	10.0061	6.19442	59.7947	42.661	8.1953	44.2644	13.9196	42.7737	106.821	83.8496	11.3729	52.8784	136.798	81.592	35.6302	65.2729	35.489	33.8056	22.741	6.75131
NM_001290039	6092	ROBO2	roundabout homolog 2 isoform 3 precursor	2.96467	3.76537	4.15096	3.06575	2.80942	2.6775	3.53063	2.90871	2.654	2.80873	1.87907	3.53787	3.37678	3.16456	2.96383	0.000604	1.21674	2.69142	2.64033	1.72268	1.85508	3.58233	2.93776	3.56815	1.63891	0.929082	2.31254	1.36967	1.7949	2.85246	2.20179	5.51967	3.25118	1.44418	2.47756	1.98173	2.01711	2.2823	2.23448	1.82206	1.0954	3.2286	1.75983	1.44606	1.30605	1.35193
NM_006914	6096	RORB	RAR-related orphan receptor B	0.632487	0.946091	5.46661	1.25693	1.08529	0.985171	25.3913	28.2567	21.5115	0.672837	0.668059	1.22639	1.01615	0.780699	0.947815	0.381208	0.224828	0.803997	0.404538	0.525126	0.659163	1.01728	0.489935	1.17687	0.390898	0.414546	0.396293	0.670193	0.574985	0.508875	2.37673	2.3178	2.96518	2.52837	3.99734	2.61549	1.49146	1.261	0.798569	0.394421	0.365523	0.340269	0.181466	0.405945	0.387055	0.246868
NM_006638	10799	RPP40	ribonuclease P/MRP 40kDa subunit	4.31689	3.9563	2.78025	2.07574	2.40576	0.564156	2.22727	1.73737	2.5942	0.690298	2.03927	1.15585	2.70754	2.11778	5e-06	1.29167	0.828257	2.21312	3.28418	3.48472	3.05052	2.1584	2.201	1.69742	1.54857	1.64228	0.356114	2.50589	2.30833	0.478277	2.25546	1.79446	2.0821	3.38158	3.06029	2.88375	2.0486	1.6791	1.63612	3.2811	2.81928	2.83605	3.64988	4.68554	1.61391	2.66164
NM_001202470	100529239	RPS10-NUDT3	RPS10-NUDT3 readthrough	1.25232	3.02902	1.01453	4.97769	3.58132	3.51846	3.13452	4.80019	4.50056	4.65945	4.38694	3.78841	1.19586	2.14265	1.69407	0.134957	0.834956	0.524169	2.73569	2.55843	3.03137	1.93732	2.06195	8.32014	3.50526	4.68948	4.11863	3.33993	1.64471	0.392955	4.48564	8.23556	10.8836	5.9166	8.88001	7.98824	8.24959	6.62773	4.30502	8.30936	7.02891	2.66173	4.82264	1.24459	1.21202	3e-05
NM_012424	26750	RPS6KC1	ribosomal protein S6 kinase, 52kDa, polypeptide 1	4.57905	6.19403	6.66263	5.2998	4.32779	3.99044	4.36037	3.50688	3.09435	4.60327	3.00669	3.93688	4.33399	4.57236	1.74475	0.000439	2.40403	1.99218	3.97598	3.40761	3.28029	7.31855	6.27141	7.0086	2.22256	2.57399	1.52389	3.1099	2.3131	2.96493	3.54113	3.41457	6.07838	4.08679	4.76545	3.76582	3.53469	3.70537	1.47478	4.07359	5.33058	4.40532	4.32515	4.04363	4.81931	4.06297
NM_004165	6236	RRAD	Ras-related associated with diabetes	1.04372	1.25819	2.03168	0.557216	0.673451	0.4056	4.94454	3.39511	5.92169	0.443075	0.997758	0.941663	3.0889	4.03528	4.10094	8.4862	6.24467	4.6339	3.05008	3.01654	3.2371	3.94835	3.62118	2.77614	12.4476	10.6521	12.2509	7.10941	9.15789	7.31676	1.23702	0.000114	1.49521	2.53943	2.60349	1.21794	1.52004	2.16107	2.31087	1.78746	3.18059	1.44491	3.90631	4.84468	4.09403	2.19978
NM_016625	51319	RSRC1	arginine/serine-rich coiled-coil 1	13.3737	10.4425	9.34105	5.14238	4.16407	7.54268	6.06365	6.33962	7.09731	3.64305	2.50451	3.88571	6.85546	5.83089	7.41425	1.79942	1.89228	3.49293	5.3654	3.69524	3.12906	3.41683	2.90942	7.50578	4.88765	3.12588	3.96339	4.28179	2.67149	4.04742	6.05573	8.10305	5.51277	4.37897	0.534328	4.34131	5.43808	4.57193	6.03181	5.43297	4.6566	4.69758	3.69603	6.05681	4.7044	4.46243
NM_015485	25950	RWDD3	RWD domain containing 3	1.53126	2.90896	2.2754	1.6843	1.96648	1.76938	3.24387	3.40102	2.31103	2.05458	0.599886	2.92193	3.56425	1.74325	3.67267	0	1.20711	1.29023	2.51725	1.24249	1.95473	2.43393	3.9826	4.14189	3.13432	2.66133	1.7875	2.00983	1.28981	1.27913	4.10463	3.15396	4.35194	1.02982	1.96072	1.33651	2.2025	0.550074	0	1.63572	3.28916	0.717141	1.93559	3.034	3.38088	1.80254
NM_006271	6271	S100A1	S100 calcium binding protein A1	0.506549	0.393954	0.44296	0	0.101738	0	0.957503	0.518638	0.401653	0.133314	0.712713	0.269302	0.489364	0.953204	0.524279	0.75564	1.29166	0.297486	1.50007	0.987433	0.730895	1.22302	0.643203	0.160017	0.154273	0.489699	1.09267	0.309023	0.150195	0.573465	1.24947	0.819631	0.832163	1.35775	0.603553	0.58879	0.708722	0.451976	1.10135	0.814253	1.30929	2.29052	0.260137	0.982664	0.913291	0.450877
NM_002965	6280	S100A9	S100 calcium binding protein A9	15.0316	0.819914	3.99878	0	0.847246	0.235905	0.830567	0.647909	1.25454	0.554964	1.18654	0.700576	4.45991	3.26132	3.5485	0.471848	0.168004	0	1.92208	1.41353	0.456542	4.93326	3.01138	1.33194	0.481566	0.127444	0	0.482157	0	0.14917	0.929203	0.170665	0	2.82597	2.38709	1.22599	0	0.156754	0.327395	1.55346	1.81715	2.24346	2.97727	4.47263	3.48382	2.0332
NM_020706	57466	SCAF4	SR-related CTD-associated factor 4	4.37215	1.75972	3.19723	2.82038	3.4476	3.04824	3.79413	2.13764	2.32227	3.22161	3.15303	2.70758	1.8862	1.54983	2.12466	0.864903	0.000304	2.8102	2.42852	2.759	2.70144	1.16481	2.57796	2.05985	1.15827	3.06077	1.7366	1.8825	2.03867	2.13388	3.11696	3.17672	3.63978	1.54806	2.8459	1.54347	3.62927	2.80716	1.75361	3.00954	1.6978	2.97602	2.60731	2.02907	2.63034	1.60368
NR_002997	677774	SCARNA1	small Cajal body-specific RNA 1	18.467	9.62517	16.7287	18.4109	11.7579	10.5465	9.72488	23.8602	17.1444	4.95411	10.3625	4.91653	15.7835	16.7285	16.2821	8.64647	2.97274	8.42127	15.4085	23.671	19.5212	6.2031	8.90454	8.46118	5.47999	7.41737	8.16788	13.2007	23.2146	5.33079	20.4741	21.6387	14.7937	9.41475	11.4361	6.10095	18.1094	31.885	57.5226	10.1581	5.73763	12.552	12.114	10.6821	7.88506	13.9221
NR_003012	677780	SCARNA11	small Cajal body-specific RNA 11	24.9445	6.89889	0	0	5.87606	25.0645	20.3115	0	27.5906	0	7.51995	14.2214	8.37432	0	8.55565	0	8.75708	0	0	0	0	9.65865	0	8.04009	7.74923	7.60123	22.8917	7.42896	14.5717	7.95573	9.8848	8.8849	0	9.10377	6.66515	0	0	22.4182	22.8362	0	0	7.29147	0	11.8207	14.4838	8.16009
NR_003139	677765	SCARNA18	small Cajal body-specific RNA 18	9.79739	8.01743	0	0	6.89261	7.34337	11.947	16.2909	0	0	0	0	0	0	0	0	10.2194	9.53118	7.38812	0	18.8223	11.3568	0	0	8.98321	0	17.6734	0	16.8981	0	11.5122	10.3335	0	21.2034	31.0467	22.1511	7.5816	17.312	44.0205	34.728	50.6884	8.49327	16.7115	6.82724	16.7265	0
NR_002999	677681	SCARNA20	small Cajal body-specific RNA 20	0	9.96241	0	28.6328	0	9.25721	15.1047	20.662	41.4818	0	0	20.6345	25.3553	0	12.9295	0	12.7753	0	9.19426	0	23.4515	0	0	0	11.1215	33.6628	21.8541	10.6619	0	11.6447	14.3629	12.8595	60.2291	52.8578	9.67037	13.9609	28.2881	0	21.7377	21.7037	0	0	10.4474	16.8113	20.586	11.8967
NR_003007	677773	SCARNA23	small Cajal body-specific RNA 23	0	29.8872	49.4459	38.1771	43.4935	37.0288	0	30.993	41.4818	10.4695	32.7438	20.6345	0	12.9735	25.8589	25.7702	12.7753	0	27.5828	0	0	0	26	34.8186	33.3646	33.6628	21.8541	53.3095	31.3981	69.8684	86.1777	25.7191	12.0458	105.716	29.0111	41.8826	28.2881	64.2312	65.213	10.8519	25.4795	31.7749	41.7897	33.6227	10.293	11.8967
NR_002998	677679	SCARNA3	small Cajal body-specific RNA 3	0	30.2555	30.6946	9.03223	25.3352	13.5385	7.2245	19.5617	19.461	5.24359	5.4726	5.17874	0	12.2983	16.131	12.5243	19.0255	11.8969	23.1664	19.9761	11.7755	6.88373	19.181	11.7611	11.3771	10.8832	5.61465	43.6691	5.34706	5.74093	0	19.4531	6.12891	19.8856	19.4022	33.7276	14.279	21.9764	28.0844	10.8007	12.4557	21.2259	20.7335	8.7432	16.0829	17.7576
NR_003005	677771	SCARNA4	small Cajal body-specific RNA 4	0	0	17.58	0	0	0	0	11.003	14.7406	0	0	0	0	13.8345	0	0	0	0	0	0	0	0	0	0	0	0	0	11.2852	0	0	0	13.6288	0	0	0	0	9.99152	0	22.989	0	13.5386	11.2323	0	0	10.8766	12.6228
NR_003009	677776	SCARNA8	small Cajal body-specific RNA 8	11.6835	0	0	0	0	0	0	0	0	9.88847	10.3091	0	0	0	0	0	0	0	8.68768	0	0	0	0	0	0	0	0	0	0	0	0	36.4528	11.389	0	0	0	0	10.1321	10.2913	0	0	0	0	0	0	0
NM_001077206	22872	SEC31A	SEC31 homolog A (S. cerevisiae)	14.634	8.00992	12.0227	1.16977	0.239269	0	5.88637	5.44428	6.10747	5.84647	4.93545	8.26729	19.7635	17.2779	16.6866	4.29642	6.36873	7.60539	8.82407	9.90046	11.3258	22.4736	15.3343	16.0343	8.81337	1.85609	4.96174	2.99037	3.36268	3.98229	3.14459	4.16097	5.75845	14.5303	7.32883	7.28512	2.82752	1.50033	2.79792	5.51142	9.71875	10.8504	11.7236	13.9047	8.14307	25.7941
NM_001005914	7869	SEMA3B	sema domain, immunoglobulin domain (Ig), short basic domain, secreted, (semaphorin) 3B	1.00651	2.04203	2.95953	0.641338	0.581662	1.18667	4.79835	3.75515	2.50777	1.13265	1.23477	1.55526	1.43232	2.52847	2.76881	6.47846	4.54393	3.85121	3.34763	1.96646	0.008078	2.25463	3.28713	0.00061	3.83275	2.36695	1.33243	0.006702	1.25636	1.42941	1.58098	0.757201	0.992683	1.41257	0.913982	1.78244	0.000588	0.894803	0.293688	2.57639	0.001443	2.07038	0.993583	2.41166	3.12026	1.40094
NM_198925	10509	SEMA4B	sema domain, immunoglobulin domain (Ig), transmembrane domain (TM) and short cytoplasmic domain, (semaphorin) 4B	3.80676	2.90576	4.79916	3.41343	5.07609	4.50366	7.38265	8.3333	5.95475	1.32991	4.28263	4.05086	5.86559	4.64864	7.63059	5.37699	5.45049	1.9844	0.083966	6.93938	3.47227	4.91699	7.51103	5.92449	0.234184	4.18529	3.93264	3.01175	4.488	5.4662	5.05504	3.3368	4.30081	3.36656	5.97093	5.16341	3.13335	3.37278	3.59278	3.50779	3.84413	7.33066	5.76809	3.41416	5.05158	2.82905
NM_001293696	10801	SEPT9	septin-9 isoform h	13.7595	30.7054	11.6688	8.91983	16.6842	4.88718	21.3957	14.6648	17.5352	18.084	14.1039	13.7479	19.0148	7.87552	7.91647	9.64174	19.0203	17.3863	9.78586	9.17767	1.08106	19.1335	13.9274	8.79314	10.6965	10.0914	9.4319	9.73169	4.69324	2.15846	8.81788	3.2573	3.12817	26.0477	25.4554	16.8332	10.1448	6.74351	2.2199	16.0249	19.1055	23.5116	23.5043	19.7501	20.576	30.3964
NM_000295	5265	SERPINA1	serpin peptidase inhibitor, clade A (alpha-1 antiproteinase, antitrypsin), member 1	10.8691	13.3712	8.86934	0.002456	0.002037	0	56.0028	47.1377	71.4505	8.91603	7.34432	2.86978	6.16357	4.33715	14.711	2.94504	10.7971	15.6258	18.3735	11.5941	13.8271	13.5596	9.64398	0.004755	2.49434	0.760153	2.05965	0.004558	16.1408	2.33501	14.3409	12.7892	9.83941	7.09275	11.4354	3.10386	3.45267	2.17008	3.27579	8.08897	8.4402	27.1912	4.82181	7.12759	8.99217	3.16273
NM_001756	866	SERPINA6	serpin peptidase inhibitor, clade A (alpha-1 antiproteinase, antitrypsin), member 6	0.409695	0.300204	0.047461	0	0	0	2.54179	2.62468	4.46618	0.217397	1.21236	0.704038	0.865927	0.791858	3.72728	0.689821	0.475124	1.74138	2.16983	1.47994	0.94815	3.17886	1.89694	2.77661	0.252366	0	0.15344	0.152467	3.01419	0.187707	1.84978	1.64672	2.60834	2.10435	0.786115	0.763206	0.076501	0.147986	0.154613	1.9054	1.22948	4.96854	0.425912	0.241737	0.898854	0.392559
NM_003025	6455	SH3GL1	SH3-domain GRB2-like 1	5.3345	20.2852	13.757	14.4873	13.3846	16.6686	19.1805	17.5726	20.3571	18.7989	17.274	14.7708	19.7533	20.7914	26.2014	26.3391	27.3451	14.5692	24.7769	24.9326	23.8114	20.3501	20.0955	14.8079	16.791	14.4714	14.9655	17.8212	18.4634	16.6356	25.047	12.2739	13.3983	13.9031	20.1778	18.4093	17.2052	20.2099	17.6829	20.5131	21.3658	18.2251	19.9379	18.9353	20.0873	16.6527
NM_003027	6457	SH3GL3	SH3-domain GRB2-like 3	4.26903	4.47556	2.61586	5.91675	4.02864	3.98851	2.32882	2.48759	1.85635	2.21527	0.012149	2.52259	7.89073	5.84779	5.12543	0.751158	0.630731	0.381815	2.49849	2.6594	3.50757	4.08049	2.67176	4.30529	2.44824	1.19943	2.02223	1.64315	2.06057	2.07475	2.65313	4.79835	2.13584	4.9276	5.54704	3.66115	2.4976	3.03379	1.68032	2.68805	4.32942	4.55309	2.78329	2.06334	3.16262	9.32035
NM_031892	30011	SH3KBP1	SH3-domain kinase binding protein 1	2.7331	0.909046	2.99883	6.10996	6.39007	6.39759	2.65294	3.73107	2.94409	2.40228	1.88974	1.86437	3.83931	3.08196	2.64782	3.7338	1.12962	7.95018	2.98364	3.02641	2.58752	4.89289	3.7558	2.68196	6.02256	5.7223	7.73401	0.873145	1.9603	2.21732	4.16243	5.2179	6.58449	1.17475	2.54616	1.21108	2.82575	2.22904	1.52216	3.82081	4.79317	4.08861	4.66587	5.41793	4.61542	3.68797
NM_001159597	26751	SH3YL1	SH3 and SYLF domain containing 1	2.08834	2.53798	3.45498	1.1947	0.81383	1.14278	3.25431	4.39617	4.13837	2.05693	1.55851	1.76425	3.3232	3.43182	2.70151	0.851111	0.874847	3.2752	3.51955	2.98547	3.12494	4.86613	3.88258	4.65144	2.74936	2.31844	1.83471	0.549766	0.74816	0.002104	2.35242	1.71117	3.23815	2.83918	0.658617	0.000501	1.85731	1.68668	1.67961	1.53174	2.96336	2.23612	2.40396	1.52885	1.67267	0.476626
NM_005866	10280	SIGMAR1	sigma non-opioid intracellular receptor 1	17.4228	11.9892	14.4425	11.9395	13.588	10.8196	19.514	19.3437	24.5569	13.4593	19.5556	6.98607	21.5136	24.9479	25.1014	38.1113	29.5707	5.89252	20.6343	24.1542	19.1087	28.7921	22.7539	13.3954	14.7876	13.6661	14.272	20.1686	21.8578	16.5366	21.4629	14.1477	15.4759	21.3536	18.6075	19.8653	11.4723	12.5395	15.3362	11.5494	22.8019	18.4976	17.9337	28.9227	25.7808	29.9724
NM_007374	4990	SIX6	SIX homeobox 6	0.249006	0	4.13476	0	0	0	33.6812	27.7798	28.8136	0.044041	0	0	0	0.089126	0.042905	0.04991	0.106946	0	0.113687	0.283617	0.192087	1.76094	0.106744	1.75113	0	0	0.103612	1.02953	0.250244	0.095064	1.11255	1.18379	2.91724	4.65572	13.8155	6.95789	0.852426	0.549615	0.522022	0.403954	0	0	0.172562	0.244852	0.10116	0.099407
NM_005414	6498	SKIL	SKI-like oncogene	8.73767	9.08072	11.5261	8.17475	7.97683	7.5578	11.1132	9.82888	10.9669	0.005592	7.44905	7.54486	8.6345	9.89671	9.18329	3.92922	2.79009	5.37757	9.70783	4.57418	3.42719	9.54679	5.37052	11.0893	7.20206	2.97485	6.31794	5.96792	5.78043	5.73828	8.38896	7.72611	14.0427	0.064151	10.0281	4.31617	5.50831	0.004143	3.71188	9.21932	10.1686	10.712	4.26386	7.07922	8.10465	11.8092
NM_012450	26266	SLC13A4	solute carrier family 13 (sodium/sulfate symporter), member 4	7.23289	3.19864	20.1191	0.823624	0.739977	1.00721	2.2732	4.29061	3.41723	2.3307	1.75099	2.31699	32.3454	26.7563	26.7099	69.1594	54.5738	55.7321	18.2223	21.154	19.2637	38.8482	36.6856	12.3427	84.7516	74.6494	76.1582	23.8759	23.939	21.2865	6.15838	3.46324	8.95301	3.94046	2.22102	2.48329	4.13082	5.70272	3.0925	8.40236	9.34813	3.986	53.249	57.8638	51.9333	15.7387
NM_004207	9123	SLC16A3	solute carrier family 16 (monocarboxylate transporter), member 3	12.183	29.9445	9.38721	8.12173	11.1751	12.7685	14.9063	8.40956	11.2148	12.9599	10.6024	6.61693	29.0304	41.9642	48.1921	17.2239	7.90998	9.68547	25.1647	11.9873	20.8741	26.8379	20.7086	15.7451	16.3756	3.95757	12.6543	22.1395	27.1582	24.3008	34.6441	24.7775	23.6018	11.0865	15.7108	13.9519	1.91712	8.68786	10.046	15.5705	36.145	21.6853	17.0176	23.8357	32.8648	40.9674
NM_004694	9120	SLC16A6	solute carrier family 16, member 6	0.807761	0.060857	2.86097	0.885025	1.11487	0.83477	0.941148	0.672516	0.848669	0.346551	0.491513	0.543744	5.94215	2.9866	3.33406	7.62538	4.27418	18.8535	2.58338	2.79394	2.1309	2.76773	3.35446	1.65753	11.4488	9.23572	10.2922	1.45812	3.0775	2.20594	1.13139	0.693113	1.08585	1.91124	1.56891	1.54736	0.582399	0.484376	0.431001	0.931439	1.49285	1.32583	4.12161	3.7831	4.02963	1.28815
NM_134263	65010	SLC26A6	solute carrier family 26 (anion exchanger), member 6	0.300738	2.30656	1.898	1.58559	0.481535	0.140585	3.55609	2.91406	3.2002	2.10248	0.000587	1.92186	1.26307	1.98946	1.0757	5.30746	3.33116	1.77741	1.93162	2.45121	2.60171	3.0389	2.61268	2.11186	3.19871	3.24482	3.36119	3.15192	2.90402	1.17954	2.86056	2.05755	2.41224	2.98034	0.793406	0.534701	2.02923	1.0451	2.00553	2.26778	2.37972	0.008412	3.23591	2.17114	3.61981	2.13461
NM_153247	222962	SLC29A4	solute carrier family 29 (equilibrative nucleoside transporter), member 4	2.53215	5.80342	7.48468	4.57899	5.7588	9.81954	4.96911	3.27228	6.41636	5.86174	5.51117	4.23685	2.58576	4.31114	7.07649	0.008639	6.20609	3.55541	13.0825	9.46351	11.898	10.4867	12.8905	5.25926	9.90117	8.8232	9.60238	8.27699	8.82406	7.86298	7.89866	7.34808	10.096	4.9364	5.89363	6.68596	6.21092	5.26376	2.62588	8.36062	0.013289	6.91294	9.94443	9.32628	8.43969	0.002943
NM_006931	6515	SLC2A3	solute carrier family 2 (facilitated glucose transporter), member 3	25.0803	22.4599	37.8477	22.4304	24.4957	21.224	20.0906	24.7853	23.3259	16.8113	12.3125	17.9506	30.2441	32.8693	27.5333	4.76089	5.81662	25.1883	24.8002	20.282	22.2562	37.5354	22.0106	37.4532	23.8378	18.5625	22.4182	7.2546	6.18017	8.022	32.6925	31.622	43.9306	32.8969	50.0034	34.8122	19.793	20.9166	20.8461	21.4853	27.2581	31.2031	25.0061	27.7051	35.0701	69.8379
NM_001142541	51000	SLC35B3	solute carrier family 35 (adenosine 3'-phospho 5'-phosphosulfate transporter), member B3	4.18268	1.70154	3.86271	1.56032	1.90442	0.98601	3.8349	4.12383	4.03312	0.785795	1.05041	1.82845	5.05453	4.94368	5.14984	1.26413	2e-06	3.25092	3.77889	1.96074	1.99425	5.12476	4.49241	5.17994	2.90697	1.4952	2.27964	1.83448	0.338222	1.54356	3.01868	2.01231	2.17044	2.14777	3.48375	1.76319	1.34385	0.270556	0.488455	0.320062	1.70598	1.3698	4.55523	3.6031	4.25636	8.20787
NM_001278389	81539	SLC38A1	solute carrier family 38, member 1	8.70289	11.3647	10.6732	11.5119	11.9598	10.2425	6.5806	6.00735	8.03464	7.27891	4.01797	8.71266	8.7513	8.35056	6.30104	1.16838	0.581747	5.76015	5.26473	6.75957	5.09071	9.23139	7.22258	12.1118	5.53433	5.26482	5.83614	3.48642	1.19749	2.50654	8.23044	10.0847	8.4954	8.33882	11.7074	4.37843	7.95937	4.31611	1.72487	6.67042	6.74029	9.51898	6.67464	5.65585	4.6654	10.975
NM_001145195	221074	SLC39A12	solute carrier family 39 (zinc transporter), member 12	1.59644	0.519441	4.52802	0.352373	0.140644	0.378156	0.221352	0.095869	0.825937	5.4e-05	5.9e-05	0.166001	9.40923	6.1828	6.86022	14.2618	12.0144	29.5516	2.40531	1.58355	1.14798	6.89088	8.28613	0.142332	7.47848	6.34128	5.99308	6.08884	5.64282	6.55021	0.375796	2.5e-05	0.979217	6.8e-05	0.354198	0.216924	0.219563	4.7e-05	0.155734	0.969863	0.665467	0.618565	3.77731	5.51441	3.39509	6.23717
NM_014585	30061	SLC40A1	solute carrier family 40 (iron-regulated transporter), member 1	30.7173	15.3863	19.2386	1.11112	1.11488	1.16969	55.5851	49.2221	70.9597	12.9097	15.8613	16.3403	63.4597	49.1448	41.066	5.48569	6.93966	22.9368	51.5373	37.4789	31.0287	41.2781	28.78	34.665	12.7033	5.66044	9.05543	10.24	6.94073	7.81609	10.9945	7.23057	7.77508	32.9584	33.6521	22.199	2.49931	2.03877	2.84044	15.7674	20.6665	30.6628	34.3535	28.6756	34.5007	197.814
NM_001253816	79581	SLC52A2	solute carrier family 52 (riboflavin transporter), member 2	8.14209	8.01298	7.10955	7.82733	7.60098	7.84016	2.31879	6.09631	4.06415	8.70922	6.43253	5.97961	8.44588	6.25339	6.82304	9.10108	11.0446	7.05123	8.56734	10.0182	6.00036	9.21855	7.81502	6.79766	7.12274	8.38589	7.55188	4.22202	9.93446	8.08239	7.72855	4.73854	0.187017	10.3562	11.2834	11.9602	6.30827	5.92962	9.04674	12.024	11.0768	9.65291	10.2147	8.35981	11.8415	8.79173
NM_003063	6588	SLN	sarcolipin	1.15415	0.300204	3.58026	0.229372	0.30951	0.172571	4.97763	4.49481	5.08612	6.29554	6.30374	4.31049	1.11279	1.6539	0.298517	3.91324	2.09247	3.62166	4.73602	2.15737	2.88906	3.25595	2.69898	6.34632	0.352904	0.372369	0	1.65254	2.5245	0.765355	1.49176	0.996579	1.26815	10.6018	11.7618	14.9893	0.89742	0.459641	1.32024	6.51463	8.85386	17.4498	1.78576	1.0312	2.67209	12.9404
NM_003064	6590	SLPI	secretory leukocyte peptidase inhibitor	3.02521	0.522871	3.96798	0	0.10127	0	30.6579	27.1544	36.9143	4.91004	4.68245	1.20632	8.88915	10.8432	9.65413	5.56611	13.1791	4.44176	28.1399	20.2716	22.5531	16.2825	9.60416	10.0352	3.37853	0.609301	2.95232	8.15206	5.38257	11.1316	3.90873	2.77386	4.14179	33.1127	38.8105	21.9775	0	0.59989	0.626481	6.75441	7.52995	10.9978	26.5427	16.1403	24.5469	68.0703
NM_001044305	60682	SMAP1	small ArfGAP 1	1.71311	5.23799	2.58115	21.1903	20.1479	16.9376	1.42957	0.965623	2.00267	5.72659	6.52471	7.41514	3.08568	5.19429	4.42675	2.25028	3.33686	0.353278	4.11326	3.89396	4.75668	3.69225	4.66392	6.29826	6.0313	2.97211	8.99458	1.75498	4.37802	3.79812	9.49616	12.4869	10.6319	6.97722	6.88667	10.4584	9.61107	5.52454	6.41685	9.48157	7.06623	2.69101	4.4204	3.82207	3.49384	0.006101
NM_001128848	6597	SMARCA4	SWI/SNF related, matrix associated, actin dependent regulator of chromatin, subfamily a, member 4	5.37221	9.04739	7.11662	7.7341	10.1007	6.75608	8.08774	8.04508	9.82417	8.69739	5.11351	10.4078	12.3959	6.24553	3.66636	8.44413	2.57259	9.05176	13.603	10.3695	11.9004	5.95794	8.60418	8.68949	5.97277	12.4831	9.67471	5.24394	3.99994	0.495703	10.0586	7.72739	11.6078	5.55985	10.0383	8.26153	10.8754	8.76753	4.6627	12.9769	5.96457	7.99752	6.77388	8.67389	4.38981	5.78018
NM_139067	6601	SMARCC2	SWI/SNF related, matrix associated, actin dependent regulator of chromatin, subfamily c, member 2	9.29708	10.5494	9.26924	21.2358	21.6179	22.9083	9.55344	7.10638	7.62872	15.5901	11.386	12.0441	10.4749	11.1672	9.74618	5.97653	6.18543	8.90565	9.73962	10.1362	7.8328	9.27052	10.5328	9.37783	6.91284	9.41255	8.96462	6.01856	5.59887	10.0644	13.7886	14.4614	14.8208	0.011756	4.21662	5.84961	10.0361	9.24279	5.97685	12.814	10.4245	11.0429	9.72634	6.94938	7.36818	5.15388
NM_003078	6604	SMARCD3	SWI/SNF related, matrix associated, actin dependent regulator of chromatin, subfamily d, member 3	7.01641	15.8672	12.3093	38.9719	40.2759	40.0999	6.92474	8.33668	7.72959	15.1963	26.725	10.615	16.0885	18.9913	29.1305	19.8819	23.1746	9.72588	19.5622	18.3147	14.4065	15.0628	31.0726	7.14228	7.69832	10.9336	5.32129	18.8705	19.9765	22.611	18.2764	17.5269	16.4756	3.84215	11.214	3.30172	16.1287	12.3065	18.7447	12.0195	18.1453	16.5152	8.15183	9.05973	13.0725	2.00126
NM_138436	114926	SMIM19	small integral membrane protein 19	6.29192	11.9796	12.9574	5.11119	5.66885	5.66864	7.966	5.97813	4.03343	7.94271	8.6245	6.19076	10.6159	11.6285	12.9351	12.0195	9.33464	5.42035	9.80113	11.4125	10.1091	10.7446	11.5372	12.4816	13.9997	5.58996	6.9382	7.15169	11.8269	1.90438	11.8473	11.4804	11.4433	16.2057	7.51	5.99977	3.10232	3.04852	5.59017	5.99678	9.64958	3.78085	13.5728	10.4777	9.16058	4.24973
NM_022137	64093	SMOC1	SPARC related modular calcium binding 1	1.06927	1.27657	1.48063	3.51694	3.5115	2.52268	7.93546	4.31537	4.50353	4.45313	4.04996	2.93298	0.996438	0.826906	0.555268	1.2918	0.949887	1.22103	0.706902	0.001156	1.84794	0.68215	2.86378	2.55584	0.350706	0.412304	1.571	1.22229	1.47513	2.8151	2.80991	2.68888	2.4883	2.74277	2.68818	1.31461	3.79108	3.36287	2.77682	2.80529	3.32437	3.21655	0.671657	0.723593	1.71577	0.906162
NR_004435_dup1	100126798	SNAR-A1	small ILF3/NF90-associated RNA A1	78.7332	0	0	1.40991	1.25756	0	25.9988	68.6064	12.0905	2.69876	6.20948	0	11.3518	0	0	0	0	0	1.27361	0	19.5443	0	0	0	9.11347	0	8.94593	23.1306	0	0	35.1366	12.2162	151.259	109.471	82.0985	49.6	4.81195	8.74753	1.47698	1.52316	17.7779	0	14.4144	6.81647	37.526	9.99272
NR_004437_dup1	100126800	SNAR-A12	small ILF3/NF90-associated RNA A12	6.95324	0	0	0	0	0	0	4.47433	0	1.24558	4.55362	0	0	0	0	0	0	0	0	0	0	0	0	0	0	0	0	0	0	0	1.71864	1.52703	27.7582	5.52855	4.03763	1.71035	0	0	0	0	0	0	0	0	4.16955	0
NR_024216	100169959	SNAR-A13	small ILF3/NF90-associated RNA A13	6.95324	0	0	0	0	0	0	4.47433	0	1.24558	4.55362	0	0	0	0	0	0	0	0	0	0	0	0	0	0	0	0	0	0	0	1.71864	1.52703	27.7582	5.52855	4.03763	1.71035	0	0	0	0	0	0	0	0	4.16955	0
NR_024242_dup3	100191063	SNAR-A14	small ILF3/NF90-associated RNA A14	10.5958	1.96939	3.1311	3.36628	1.36032	3.65773	3.11544	13.6297	11.6186	12.8836	3.73576	10.0743	0	0	0	7.3911	7.17253	8.77693	6.47322	1.77629	6.53134	0	2.35961	0	0	2.0529	3.83372	19.1009	17.4164	15.2199	31.1654	18.7288	152.141	35.9531	18.3151	38.925	18.0645	5.82685	5.79723	5.78943	4.25707	4.02247	7.2363	10.6951	7.53223	0
NR_004436_dup1	100126799	SNAR-A2	small ILF3/NF90-associated RNA A2	78.7332	0	0	1.40991	1.25756	0	25.9988	68.6064	12.0905	2.69876	9.5212	0	11.3518	0	0	11.0177	0	0	1.27361	0	19.5443	0	0	0	9.11347	0	8.94593	23.1306	0	0	43.1569	12.2162	155.006	104.732	79.4067	49.6	10.3113	8.74753	1.47698	1.52316	17.7779	0	14.4144	6.81647	37.526	9.99272
NR_024226	100169955	SNAR-A9	small ILF3/NF90-associated RNA A9	6.34534	0	3.1311	3.36628	1.36032	1.73261	0	9.33686	0	6.64243	7.29363	1.85039	0	0	0	13.6603	4.61091	6.40478	4.64978	1.77629	4.19872	0	2.35961	0	0	2.0529	3.83372	9.40792	9.22045	10.5369	19.6683	8.52633	92.9702	26.0709	14.4593	7.00834	9.05686	3.74583	1.58106	3.60474	0	1.90538	3.79044	5.83368	3.5679	0
NR_024231_dup1	100170224	SNAR-B1	small ILF3/NF90-associated RNA B1	0	0	0	19.9807	0	0	30.294	0	0	0	31.5928	9.95996	0	13.5098	0	51.3297	37.2486	11.4934	8.82741	38.2253	11.2962	28.6687	12.7125	0	0	0	10.2859	20.2125	19.8036	22.7024	111.464	37.043	425.369	76.801	93.3892	83.7029	0	10.0405	10.1715	42.3912	25.2827	30.7791	51.0763	31.261	19.116	23.1559
NR_024230_dup1	100170217	SNAR-B2	small ILF3/NF90-associated RNA B2	0	0	0	19.9807	0	0	30.294	0	0	0	31.5928	9.95996	0	13.5098	0	51.3297	37.2486	11.4934	8.82741	38.2253	11.2962	28.6687	12.7125	0	0	0	10.2859	20.2125	19.8036	22.7024	111.464	37.043	425.369	76.801	93.3892	83.7029	0	10.0405	10.1715	42.3912	25.2827	30.7791	51.0763	31.261	19.116	23.1559
NR_024221	100170226	SNAR-C3	small ILF3/NF90-associated RNA C3	0	10.2658	0	0	0	0	32.7843	0	0	0	0	0	0	0	0	0	0	12.3979	0	0	12.1776	15.5082	0	0	0	0	0	0	0	24.4963	135.338	0	359.091	41.4437	50.3628	0	0	0	0	0	13.6791	0	0	0	10.2598	12.4977
NR_024218	100170219	SNAR-C4	small ILF3/NF90-associated RNA C4	0	9.52931	0	0	0	0	30.294	0	0	0	0	0	0	0	0	0	0	11.4934	0	0	11.2962	14.3343	0	0	0	0	0	0	0	22.7024	125.397	0	333.397	38.4005	46.6946	0	0	0	0	0	12.6413	0	0	0	9.55799	11.578
NR_004383	100126780	SNAR-G1	small ILF3/NF90-associated RNA G1	14.1222	0	0	0	0	0	0	11.7361	0	0	0	0	0	0	0	0	0	0	0	0	0	0	0	0	0	0	0	0	0	0	0	0	0	0	10.8866	0	0	0	12.1725	0	0	11.9301	0	0	0	0
NR_034011	100093630	SNHG8	small nucleolar RNA host gene 8 (non-protein coding)	33.9484	37.149	38.9409	8.9877	3.52853	3.91406	62.6745	54.9353	46.6429	9.41405	13.5473	16.2893	39.9523	39.9202	44.6455	22.0258	28.1396	2.15442	41.3268	39.8929	50.428	27.2462	36.9037	26.4732	6.03846	10.9705	10.8112	22.6078	26.3565	13.2694	10.9246	2.12208	9.35397	76.7106	77.5987	66.1625	8.26256	11.7074	21.7309	59.6792	69.6656	59.0175	46.7823	61.3589	55.7605	53.9528
NR_003026	677792	SNORA1	small nucleolar RNA, H/ACA box 1	12.426	9.96241	0	9.54428	8.6987	9.25721	15.1047	0	0	0	0	0	0	0	12.9295	0	12.7753	11.8888	9.19426	0	11.7258	0	0	0	0	0	10.9271	0	0	0	0	12.8595	0	0	0	0	0	0	10.8688	10.8519	12.7397	0	0	0	10.293	11.8967
NR_002327	574042	SNORA10	small nucleolar RNA, H/ACA box 10	51.8766	152.077	164.456	55.6176	29.1562	93.1614	75.8579	94.8934	92.1315	106.282	73.8772	165.863	231.367	194.536	96.5924	162.257	129.423	40.2125	116.823	92.5189	109.16	60.0839	131.393	88.5893	28.3749	122.526	18.6019	81.5911	169.044	147.268	133.565	250.541	224.896	55.9015	139.14	117.124	87.9008	255.127	166.738	164.911	107.12	188.11	194.009	100.503	228.623	110.489
NR_002953	677799	SNORA11	small nucleolar RNA, H/ACA box 11	11.6835	12.5562	0	8.96341	0	0	14.2149	19.4292	38.9714	9.88847	10.3091	19.49	0	36.5613	24.2617	12.1379	0	0	17.3754	0	11.0761	27.0128	0	0	0	0	10.3422	20.1743	19.8032	0	0	0	0	12.4812	9.13493	13.1484	8.91107	40.5284	61.7481	10.2419	24.0139	20.0047	19.7193	0	29.2625	0
NR_003711_dup1	100124541	SNORA11D	small nucleolar RNA, H/ACA box 11D	30.1872	45.6171	40.1908	34.9458	21.079	44.8265	27.4332	27.167	16.8316	56.3866	39.1974	49.4055	23.2919	31.6348	31.6537	38.8905	76.6283	56.9564	16.4895	35.6532	16.3719	26.0352	23.4476	27.7159	13.235	60.8762	25.991	31.7468	31.1575	83.9202	43.0368	61.505	21.5657	87.0608	75.2601	33.7477	30.0447	63.6441	71.0033	58.6382	69.1443	50.7668	50.2002	51.479	48.7907	0
NR_002922	654322	SNORA13	small nucleolar RNA, H/ACA box 13	0	8.44874	13.7047	0	0	0	25.286	0	11.5164	0	0	0	10.5167	21.6151	32.1975	0	0	0	0	0	0	12.0168	0	0	9.4583	0	0	9.06567	0	0	0	0	20.4451	22.3606	16.3694	0	7.99098	9.11169	9.26322	0	0	0	0	7.17881	0	0
NR_002955	677801	SNORA14A	small nucleolar RNA, H/ACA box 14A	9.79739	24.0523	0	7.49799	13.7852	0	0	16.2909	21.7313	16.7955	0	0	9.91299	10.2008	10.119	10.2321	0	19.0624	29.5525	15.9546	9.41114	0	10.3675	0	17.9664	8.91563	0	8.61035	8.44907	18.5971	11.5122	10.3335	9.70368	21.2034	7.76168	11.0755	7.5816	0	26.4123	8.68201	10.1377	8.49327	16.7115	13.6545	33.4529	0
NR_002956	677802	SNORA14B	small nucleolar RNA, H/ACA box 14B	18.5288	38.0857	73.2067	21.2588	26.1077	13.9119	45.2163	15.4023	20.5311	7.97219	16.6277	0	37.4316	28.9261	19.1098	19.3826	29.0865	27.1424	7.01727	37.8771	35.7452	42.9873	49.1443	35.5018	17.0841	0	16.8111	40.9389	32.1324	44.087	32.7865	19.6293	18.4452	30.1957	51.5839	20.9722	57.6162	49.3983	33.5117	24.7126	57.6351	40.3137	63.4092	38.9998	23.8888	0
NR_002957	677803	SNORA15	small nucleolar RNA, H/ACA box 15	10.3753	0	0	7.94538	0	0	0	0	0	8.85685	0	5.81976	0	0	7.15499	7.21142	0	0	0	5.6072	0	0	0	19.6865	9.4583	18.8501	0	0	0	0	0	0	0	0	8.18468	0	0	9.11169	0	0	10.712	0	5.87907	0	5.86212	0
NR_003035	692073	SNORA16A	small nucleolar RNA, H/ACA box 16A	29.3922	64.1394	90.4595	59.9839	20.6778	29.3735	23.894	32.5819	21.7313	33.5911	17.5135	41.3908	69.3909	51.0041	80.9521	40.9282	40.8778	38.1247	73.8812	111.682	47.0557	34.0703	31.1024	74.7294	53.8993	8.91563	8.83668	17.2207	59.1435	55.7912	23.0245	51.6675	9.70368	53.0086	93.1401	66.4532	98.5609	43.28	79.2368	17.364	60.8261	33.9731	50.1346	95.5814	50.1794	38.0739
NR_002958	677804	SNORA17	small nucleolar RNA, H/ACA box 17	10.3181	8.6883	0.00119	0	1e-06	0	27.4145	0	0	0	9.45982	1.87216	0	0.00101	2.0843	0	10.4395	8.64924	0	1.94037	21.8497	0.000367	5.4637	3.2e-05	0	0	0.866492	5.2e-05	33.3143	11.4016	0	5.5e-05	11.8612	0	5.82785	6.9e-05	5.08163	25.3319	22.4527	14.1104	5.25716	0.001206	16.3084	17.9803	5.10095	0
NR_002959	677805	SNORA18	small nucleolar RNA, H/ACA box 18	0	71.3133	87.3209	16.8646	30.8779	32.8781	13.3969	45.7411	36.6683	0	29.252	27.652	44.697	22.935	45.6036	45.8034	34.1893	21.2342	24.6607	35.5157	41.9081	12.7314	11.5788	31.1562	49.8523	29.9283	39.2066	38.2267	37.5199	62.2729	25.6473	0	21.566	47.2207	8.64129	12.4016	42.1648	48.0119	78.0607	58.0816	22.6666	37.8373	18.637	37.7859	37.0229	21.226
NR_002963	677809	SNORA24	small nucleolar RNA, H/ACA box 24	35.0505	131.84	0	0	24.5637	34.8636	14.2149	38.8584	12.9905	49.4423	51.5456	48.7251	154.597	73.1225	48.5234	36.4138	108.521	22.4544	52.1261	28.1564	55.3803	94.5448	110.342	87.7709	42.0934	10.5729	20.6843	10.0872	29.7047	32.9579	27.1237	36.4528	68.3343	62.4058	109.619	78.8904	71.2886	30.3963	82.3307	102.419	48.0278	100.023	78.877	79.6494	156.067	33.6862
NR_003028	684959	SNORA25	small nucleolar RNA, H/ACA box 25	44.0086	17.8283	43.6605	8.43228	0	0	66.9846	18.2964	12.2228	0	0	0	11.1743	11.4675	0	11.4508	0	0	8.22023	0	10.477	0	23.1575	20.7708	9.97046	0	9.80164	19.1133	18.76	10.3788	0	0	0	35.4155	8.64129	37.2048	16.8659	19.2047	9.75758	0	22.6666	18.9187	0	37.7859	18.5114	10.613
NR_003016	677810	SNORA26	small nucleolar RNA, H/ACA box 26	43.2646	49.5488	28.9419	67.6757	0	16.0226	25.9988	35.7946	0	17.4381	0	17.2212	90.8147	68.7436	46.2318	44.0706	0	19.866	45.8501	33.0786	39.0886	0	87.7516	38.4206	36.4539	0	71.5674	35.0948	17.2028	58.7914	48.1219	85.5134	39.8579	0	113.054	71.8345	46.9165	34.9901	106.342	18.2779	21.7286	70.9121	17.6176	40.8988	33.3564	19.9854
NR_002575	619499	SNORA27	small nucleolar RNA, H/ACA box 27	16.1604	25.3303	43.0765	12.4962	33.8315	11.9875	0	0	54.093	13.3432	27.833	26.3108	33.3581	0	0	0	0	30.3364	58.5133	12.6539	29.8885	55.6526	33.3457	14.7458	28.1319	14.4419	13.8096	13.5018	52.9973	14.9122	0	49.1081	0	50.5982	49.336	0	35.973	94.6654	27.4228	41.6865	16.411	13.5233	13.386	52.8794	0	0
NR_002964	677811	SNORA28	small nucleolar RNA, H/ACA box 28	16.1604	12.6652	21.5382	0	0	11.9875	0	13.4177	18.031	0	0	13.1554	0	16.9614	16.9967	0	0	15.1682	0	0	0	18.5509	0	14.7458	14.066	28.8838	13.8096	0	0	14.9122	18.3435	0	0	0	0	0	11.991	0	13.7114	0	0	0	0	0	0	0
NR_002950	677793	SNORA2A	small nucleolar RNA, H/ACA box 2A	18.5288	30.4685	0	7.08626	13.0538	13.9119	0	15.4023	0	0	24.9415	7.8599	18.7158	9.64203	19.1098	0	29.0865	27.1424	28.0691	22.7263	8.93629	21.4937	9.82886	8.87546	17.0841	59.1098	0	32.7511	0	17.6348	0	39.2587	18.4452	0	22.1074	20.9722	36.0101	74.0974	50.2676	41.1876	0	32.2509	31.7046	51.9997	47.7775	0
NR_002951	677794	SNORA2B	small nucleolar RNA, H/ACA box 2B	0	6.89889	0	6.35573	0	0	0	6.90847	0	0	0	0	0	0	8.55565	0	0	0	0	0	8.08503	0	0	8.04009	0	0	0	0	7.28586	7.95573	19.7696	0	0	0	6.66515	0	0	0	15.2242	7.44206	0	0	0	0	0	0
NR_002580	619562	SNORA3	small nucleolar RNA, H/ACA box 3	86.9819	139.474	16.482	47.7214	60.8909	27.7716	120.837	185.958	124.445	73.2866	43.6584	82.5382	114.099	129.735	116.365	90.1958	127.753	71.3328	36.777	79.4774	128.983	100.442	65	46.4248	44.4861	33.6628	65.5623	95.9571	177.923	34.9342	57.4518	90.0168	48.1833	105.716	87.0333	97.726	66.0055	203.399	163.032	75.9631	89.1782	84.7331	146.264	168.113	92.637	95.174
NR_002967	677814	SNORA31	small nucleolar RNA, H/ACA box 31	12.426	0	0	0	0	0	15.1047	20.662	13.8273	0	0	10.3173	25.3553	0	38.7884	0	12.7753	0	45.9713	0	35.1773	0	39	0	0	0	10.9271	42.6476	31.3981	11.6447	28.7259	38.5786	12.0458	26.4289	0	0	37.7174	0	43.4753	0	0	42.3666	0	25.217	10.293	23.7935
NR_003032	692063	SNORA32	small nucleolar RNA, H/ACA box 32	0	0	0	18.3615	0	0	0	0	52.2838	0	0	0	0	0	0	0	0	0	0	0	0	0	0	0	0	0	0	0	0	21.0738	0	0	0	0	0	0	16.7856	0	0	0	0	0	0	0	0	21.4918
NR_002436	594839	SNORA33	small nucleolar RNA, H/ACA box 33	20.7507	8.44874	0	0	0	0	0	8.62668	0	0	0	0	0	0	21.465	10.8171	10.7852	0	31.1529	0	0	12.0168	0	9.84326	0	0	0	9.06567	0	9.81784	0	0	0	0	8.18468	11.7124	7.99098	9.11169	18.5264	0	0	8.95764	0	7.17881	0	10.0444
NR_002993	677816	SNORA35	small nucleolar RNA, H/ACA box 35	14.1222	0	18.7798	0	0	0	17.1323	0	0	0	0	0	14.485	14.7786	0	29.1721	57.6056	66.9401	20.6841	44.7149	26.3955	16.2654	14.678	0	162.13	190.378	122.481	11.9619	70.4466	91.969	0	0	13.5332	0	0	0	0	0	12.1725	36.7197	28.8218	0	129.646	75.2068	46.0386	26.8256
NR_003706	100124536	SNORA38B	small nucleolar RNA, H/ACA box 38B	22.0043	151.541	43.6605	25.2968	23.1584	41.0976	26.7938	73.1857	48.8911	28.0574	39.0027	46.0867	78.2198	34.4025	57.0045	22.9017	102.568	10.6171	49.3214	26.6368	20.9541	0	34.7363	20.7708	39.8819	39.9044	78.4131	76.4533	75.0399	83.0305	25.6473	57.4865	32.349	106.247	120.978	74.4095	25.2989	57.6142	97.5758	232.327	90.6663	85.134	37.274	188.929	138.836	31.839
NR_002972	677821	SNORA39	small nucleolar RNA, H/ACA box 39	0	0	0	0	0	0	10.7082	0	0	7.57707	0	0	0	0	0	0	0	0	0	0	0	20.3641	0	0	0	0	8.00421	0	0	0	0	0	0	0	0	0	6.84929	0	7.98136	7.82504	9.11274	15.3259	7.5272	0	0	0
NR_002588	619568	SNORA4	small nucleolar RNA, H/ACA box 4	0	6.89889	54.586	6.35573	17.6282	0	30.4673	48.3593	18.3938	7.20986	30.0798	14.2214	25.123	43.2517	42.7782	0	35.0283	16.3626	6.35231	27.4199	0	0	44.3279	8.04009	7.74923	0	7.63057	7.42896	51.001	23.8672	9.8848	17.7698	25.0802	18.2075	26.6606	0	19.5637	22.4182	30.4483	22.3262	25.9663	14.5829	14.313	23.6414	14.4838	24.4803
NR_002973	677822	SNORA40	small nucleolar RNA, H/ACA box 40	15.0936	23.8002	100.477	23.2972	10.5395	33.6199	0	37.6159	33.6631	25.0607	13.0658	0	77.6396	47.4522	47.4806	31.1124	30.6513	42.7173	43.9719	0	0	0	0	27.7159	13.235	67.6402	12.9955	25.3974	37.389	27.9734	51.6441	61.505	0	94.9754	34.7355	16.8738	56.3338	101.831	167.826	13.0307	61.4616	12.6917	25.1001	9.96367	0	0
NR_002974	677823	SNORA42	small nucleolar RNA, H/ACA box 42	0	8.01743	12.9228	0	6.89261	0	0	0	10.8656	25.1933	8.75673	0	9.91299	0	0	10.2321	0	0	0	15.9546	0	0	10.3675	0	0	0	0	8.61035	0	9.29853	0	0	0	10.6017	15.5234	22.1511	0	0	0	8.68201	0	0	0	0	0	0
NR_002976	677825	SNORA44	small nucleolar RNA, H/ACA box 44	22.0043	35.6567	0	8.43228	15.4389	32.8781	107.175	109.779	12.2228	37.4099	39.0027	36.8694	33.5228	57.3375	0	11.4508	22.7929	10.6171	32.8809	26.6368	31.4311	0	34.7363	0	19.9409	39.9044	29.4049	28.67	37.5199	51.8941	25.6473	11.4973	21.566	23.6104	77.7716	37.2048	16.8659	86.4214	58.5455	9.68027	33.9999	18.9187	27.9555	52.9002	64.79	63.6781
NR_002977	677826	SNORA45	small nucleolar RNA, H/ACA box 45	11.6835	0	0	8.96341	0	0	0	9.7146	0	0	20.6182	0	0	0	0	0	36.1738	0	0	0	0	0	0	10.9714	10.5234	0	0	0	19.8032	0	0	0	0	24.9623	0	0	0	0	10.2913	20.4837	0	0	9.85963	7.96494	0	0
NR_002978	677827	SNORA46	small nucleolar RNA, H/ACA box 46	0	7.61713	24.4022	0	0	6.95594	0	7.70114	0	7.97219	0	7.8599	0	9.64203	9.55491	0	0	9.04745	0	0	0	21.4937	0	8.87546	0	8.44426	0	0	8.0331	35.2696	0	19.6293	0	0	7.36913	0	7.20203	16.4661	41.8896	16.475	9.60585	0	7.92615	6.49996	0	0
NR_002980	677830	SNORA50	small nucleolar RNA, H/ACA box 50	8.7714	21.7349	23.0682	33.5321	18.5665	19.7931	21.4164	29.1587	29.1317	30.3083	47.414	7.47149	53.0778	73.0118	54.2109	9.19031	27.627	42.992	66.7268	50.4143	50.9704	10.1821	55.9757	50.6557	32.5258	56.0487	16.0084	31.1788	38.2301	75.3352	62.3254	27.9984	8.77571	47.8347	14.0086	9.93975	27.3972	62.7146	39.9068	31.3002	27.3382	45.9776	7.5272	37.1692	37.9492	42.8986
NR_002981	677831	SNORA51	small nucleolar RNA, H/ACA box 51	0	8.91417	0	0	0	8.21952	0	9.14821	12.2228	0	0	0	0	0	0	0	11.3964	0	0	0	0	0	0	0	0	9.97611	0	19.1133	0	10.3788	0	0	10.783	11.8052	0	12.4016	0	9.60238	9.75758	0	0	0	9.3185	7.55717	9.25572	0
NR_003015	677832	SNORA53	small nucleolar RNA, H/ACA box 53	48.4191	18.2706	28.7763	18.4465	15.8897	13.2029	9.87133	16.452	14.2738	6.82571	21.6345	6.21747	29.0265	25.7525	48.3402	10.5789	24.5654	3.49604	20.8547	24.7035	31.9407	16.7449	19.1571	25.5473	7.06913	11.0992	12.0784	15.948	32.3725	27.058	19.6098	20.228	23.7804	39.4557	16.4536	22.7264	17.4733	46.8332	154.216	34.1037	20.0294	22.6032	13.7931	19.5535	11.7469	12.5463
NR_002983	677834	SNORA55	small nucleolar RNA, H/ACA box 55	0	0	0	0	0	6.26612	0	20.7254	9.19688	7.20986	0	7.1107	0	0	0	0	0	0	0	0	0	9.65865	0	8.04009	0	7.60123	7.63057	0	0	0	0	8.8849	0	0	0	0	0	0	0	7.44206	8.65542	0	0	0	7.24191	0
NR_002919	654319	SNORA5A	small nucleolar RNA, H/ACA box 5A	19.5948	40.0871	64.614	37.4899	34.4631	36.7168	23.894	48.8728	43.4626	50.3866	0	33.1127	0	51.0041	50.595	71.6244	71.5361	28.5935	44.3287	63.8183	65.878	22.7136	20.7349	28.0235	17.9664	17.8313	8.83668	34.4414	42.2453	92.9853	11.5122	62.001	9.70368	42.4069	38.8084	33.2266	37.908	60.592	88.0409	26.046	0	33.9731	16.7115	34.1362	33.4529	28.5554
NR_002991	677796	SNORA5C	small nucleolar RNA, H/ACA box 5C	33.2593	27.5956	87.3375	50.8458	0	25.0645	71.0903	62.1762	36.7875	21.6296	22.5599	28.4428	41.8716	34.6014	59.8895	26.1782	26.2713	32.7251	25.4093	27.4199	48.5102	19.3173	53.1935	16.0802	23.2477	38.0061	30.5223	44.5737	51.001	55.6901	9.8848	79.9641	33.4402	36.4151	39.9909	47.1657	58.6912	67.2545	45.6725	52.0944	51.9325	36.4573	21.4696	23.6414	21.7257	24.4803
NR_002325	574040	SNORA6	small nucleolar RNA, H/ACA box 6	9.51155	16.5655	0	3.65211	3.43762	3.68004	11.663	7.87042	5.20972	4.29396	0	8.49143	9.50999	4.97391	14.6335	10.1758	25.9004	0	3.80105	0	9.651	0	0	4.83407	0	8.82042	9.26083	8.99531	4.40305	14.0332	0	0	5.04697	16.2962	3.9714	5.46155	0	0	18.5603	13.2492	5.06552	0	8.46484	0	4.43629	9.68151
NR_002986	677837	SNORA60	small nucleolar RNA, H/ACA box 60	0	0	0	0	0	0	32.1246	21.869	9.71057	0	7.90233	7.47149	0	9.12648	0	9.19031	9.20901	8.5984	6.67268	7.20204	8.49506	0	9.32929	0	0	16.0139	8.00421	0	15.2921	8.37057	10.3876	0	8.77571	0	21.0129	19.8795	0	7.83933	0	0	0	7.66294	0	6.19486	15.1797	0
NR_002987	677838	SNORA61	small nucleolar RNA, H/ACA box 61	111.834	169.361	131.856	47.7214	34.7948	9.25721	75.5234	258.275	138.273	31.4086	65.4877	41.2691	101.421	103.788	51.7179	51.5405	89.427	23.7776	55.1655	89.412	70.3546	14.3488	78	162.487	133.458	56.1046	76.4894	117.281	73.2623	104.803	28.7259	90.0168	60.2291	105.716	67.6926	111.687	75.4348	214.104	228.245	54.2593	76.4384	74.1415	52.2372	109.274	92.637	95.174
NR_002324	6044	SNORA62	small nucleolar RNA, H/ACA box 62	23.5083	17.3355	5.03739	9.05369	5.71472	9.19212	14.4257	16.1792	8.55355	7.17061	11.2367	14.1967	0	0	4.02087	8.442	8.63408	8.1309	9.53563	6.84351	12.0959	0	4.33058	20.2543	3.92934	7.2964	7.7818	0	0	11.6677	9.85972	17.8187	4.23586	31.7728	6.6313	4.51429	26.1374	41.8287	35.1412	3.68404	4.20477	3.6315	7.05183	6.08895	14.9546	12.1125
NR_002326	26784	SNORA64	small nucleolar RNA, H/ACA box 64	0	328.714	180.919	89.9758	75.8187	58.7469	59.7349	114.037	43.4626	75.5799	35.0269	74.5035	128.869	255.021	222.618	92.0885	153.292	142.968	110.822	183.477	94.1115	158.995	165.88	74.7294	125.765	115.903	70.6934	180.817	160.532	158.075	138.147	155.003	97.0368	127.221	349.275	265.813	98.5609	199.088	325.751	251.778	202.754	220.825	309.163	464.252	301.077	85.6663
NR_002449	26783	SNORA65	small nucleolar RNA, H/ACA box 65	0	0	0	0	6.18883	6.59771	0	0	9.71057	0	0	0	8.8463	0	0	0	0	0	0	0	8.49506	0	0	0	0	8.00696	8.00421	7.79469	7.64603	0	10.3876	0	0	9.56694	7.00431	0	6.84929	0	31.9255	7.82504	0	7.66294	7.5272	0	0	17.1594
NR_002444	26782	SNORA66	small nucleolar RNA, H/ACA box 66	10.3753	25.3462	0	15.8908	21.8671	23.2903	12.643	8.62668	11.5164	0	9.23465	17.4593	21.0334	21.6151	0	10.8171	0	20.1062	7.78822	16.8216	29.7709	12.0168	0	9.84326	0	0	9.30097	18.1313	35.5883	0	12.1423	0	0	78.2621	24.554	23.4249	23.9729	54.6702	9.26322	36.647	0	0	35.2744	7.17881	8.79318	20.0889
NR_002910	26776	SNORA71B	small nucleolar RNA, H/ACA box 71B	52.6284	57.9597	34.6024	13.4128	12.3777	39.5863	74.9575	65.6071	38.8423	30.3083	23.707	22.4145	26.5389	18.253	18.0703	0	27.627	8.5984	40.0361	36.0102	76.4555	50.9103	46.6464	67.5409	32.5258	32.0278	24.0126	23.3841	53.5222	33.4823	20.7751	37.3312	17.5514	38.2677	112.069	109.337	68.4929	86.2326	95.7764	70.4253	63.7892	30.6518	52.6904	86.7281	83.4883	77.2174
NR_003017	677839	SNORA71C	small nucleolar RNA, H/ACA box 71C	31.5657	65.7664	41.3846	12.0626	11.1721	17.8761	28.9284	65.5488	17.4415	20.6043	71.6421	13.5499	39.6911	41.0487	8.11264	8.29536	58.3575	15.5865	30.2702	19.5956	15.4069	18.3459	25.3041	45.9919	22.1788	50.5695	21.8464	14.1763	90.3544	37.8504	9.41707	50.8081	71.7571	104.074	50.796	71.7029	49.726	64.178	65.4085	70.861	49.3839	69.4593	27.2481	45.1586	41.5032	31.0797
NR_002581	26775	SNORA72	small nucleolar RNA, H/ACA box 72	0	35.6567	0	8.43228	0	24.6586	40.1907	9.14821	0	9.35248	0	0	11.1743	11.4675	22.8018	11.4508	34.1893	0	24.6607	17.7579	10.477	0	0	10.3854	9.97046	9.97611	0	19.1133	0	31.1364	12.8237	11.4973	0	0	8.64129	24.8032	16.8659	0	29.2727	0	22.6666	18.9187	18.637	22.6715	18.5114	21.226
NR_002915	26821	SNORA74A	small nucleolar RNA, H/ACA box 74A	20.5795	13.9494	7.45957	2.85454	2.79117	5.05347	20.8806	20.7335	10.3393	0	7.48904	5.9273	14.4354	7.77981	10.0255	13.601	7.11196	6.71934	8.45719	12.4805	5.35004	17.1576	5.64209	6.8841	6.68444	4.58174	2.67445	6.49085	6.32456	6.32657	11.4843	7.46084	13.0451	10.5624	18.5682	11.2186	2.17379	9.10503	12.1486	10.918	9.4142	15.6576	11.5219	15.775	2.59585	14.6734
NR_002921	654321	SNORA75	small nucleolar RNA, H/ACA box 75	0	0	0	6.35573	5.87606	0	0	0	0	0	0	7.1107	0	0	0	8.72607	8.75708	0	0	0	8.08503	0	0	8.04009	0	7.60123	0	7.42896	14.5717	0	0	8.8849	0	0	0	0	0	0	0	0	0	7.29147	0	0	0	0
NR_002995	677842	SNORA76	small nucleolar RNA, H/ACA box 76	10.3753	59.1412	82.228	31.7815	14.5781	23.2903	63.2149	51.7601	57.5822	26.5706	64.6426	34.9186	231.367	140.498	128.79	86.537	64.7113	20.1062	124.611	100.93	158.778	24.0336	98.5444	78.7461	28.3749	56.5503	37.2039	18.1313	26.6912	58.907	109.28	130.717	51.1128	145.344	73.6621	35.1373	95.8918	127.564	83.369	36.647	117.832	44.7882	17.6372	100.503	96.725	120.533
NR_003019	677843	SNORA77	small nucleolar RNA, H/ACA box 77	0	13.5009	0	0	0	8.56542	0	0	0	0	29.6929	0	17.9532	0	18.2912	53.3522	0	0	12.4781	0	15.94	0	0	0	0	0	14.6974	28.7582	0	31.8499	0	17.4543	0	0	0	19.3064	0	0	0	0	0	14.4332	0	11.2428	0	0
NR_003020	677844	SNORA78	small nucleolar RNA, H/ACA box 78	15.0936	47.6005	0	11.6486	0	33.6199	91.444	112.848	117.821	50.1214	65.329	12.3514	0	79.0869	0	15.5562	45.977	0	54.9649	59.4221	70.1654	69.4271	62.527	83.1477	26.4701	40.5841	0	63.4935	62.3151	41.9601	0	61.505	57.5086	0	69.4709	50.6215	78.8673	114.559	116.187	39.0922	76.8271	25.3834	25.1001	49.8184	36.593	57.0986
NR_003021	677845	SNORA79	small nucleolar RNA, H/ACA box 79	0	0	0	0	5.06625	5.40759	8.72223	5.92074	0	0	0	0	7.15982	0	0	0	0	0	5.51606	0	7.01554	0	0	0	0	0	0	12.9454	6.34438	13.7519	0	7.7165	7.27499	0	5.78133	16.2381	0	6.51279	6.64461	0	14.9368	0	0	0	0	0
NR_002996	677846	SNORA80	small nucleolar RNA, H/ACA box 80	0	79.6946	23.0682	114.009	80.4548	79.1725	117.79	36.4484	48.5529	98.5019	71.121	52.3005	106.156	136.897	90.3515	45.9516	73.6721	25.7952	146.799	151.243	135.921	71.2744	74.6343	101.311	65.0516	64.0557	48.0252	70.1522	76.4603	75.3352	135.038	149.325	122.86	86.1024	21.0129	39.759	171.232	360.609	271.366	140.851	82.0147	91.9553	82.7992	130.092	53.1289	145.855
NR_002989	677847	SNORA81	small nucleolar RNA, H/ACA box 81	11.4786	12.4931	21.5792	8.95348	4.32696	4.67368	9.41323	14.1048	18.5323	9.1584	26.852	7.28497	7.62146	8.01893	11.8395	2.1144	10.9706	2.07423	13.0366	14.0062	16.5041	6.75995	10.9173	20.9981	10.203	9.0035	2.03341	5.91401	26.9327	21.5625	27.7948	11.4657	15.4522	30.1895	26.1632	39.8592	23.4637	23.7837	63.3174	26.2382	14.7003	11.1391	17.8394	11.1826	25.5874	2.05682
NR_002952	677798	SNORA9	small nucleolar RNA, H/ACA box 9	31.126	168.975	95.9326	31.7815	58.3123	69.871	50.5719	69.0134	46.0657	53.1411	55.4079	17.4593	105.167	75.6527	139.522	10.8171	32.3556	20.1062	70.0939	126.162	148.855	48.0671	76.6456	98.4326	37.8332	28.2752	0	81.5911	97.8677	58.907	84.9959	141.61	122.671	167.705	171.878	175.686	63.9278	200.457	120.422	100.779	107.12	197.068	176.372	143.576	87.9318	10.0444
NR_002435	594838	SNORD100	small nucleolar RNA, C/D box 100	0	0	0	0	0	0	0	0	0	0	0	0	0	1234.02	0	0	0	0	0	0	0	0	0	0	0	589.483	549.553	0	0	0	0	0	0	0	0	0	0	0	0	0	0	0	0	432.268	0	0
NR_033295_dup1	692235	SNORD103B	small nucleolar RNA, C/D box 103B	0	0	0	0	0	130.222	0	101.879	0	0	0	0	0	0	223.047	0	0	113.308	0	91.4183	108.097	0	0	0	87.9679	0	0	0	0	0	0	119.124	0	0	0	0	84.5505	0	0	0	0	104.397	0	0	0	0
NR_004380	692227	SNORD104	small nucleolar RNA, C/D box 104	0	0	781.874	640.015	0	538.206	0	0	0	1087.11	421.66	411.621	0	819.972	0	1088.45	0	471.751	0	377.909	889.511	1101.64	462.055	409.201	0	0	0	0	0	0	0	995.882	0	0	394.385	0	349.08	287.586	313.053	0	0	878.444	0	0	0	0
NR_003688	100113382	SNORD105B	small nucleolar RNA, C/D box 105B	0	0	0	0	0	0	467.348	161.813	0	0	0	0	0	0	0	209.114	183.466	177.403	0	143.302	0	0	186.161	317.922	0	0	142.843	143.243	273.578	0	0	372.534	0	0	146.727	237.181	265.102	251.833	131.953	0	0	163.049	0	108.77	266.198	0
NR_003078	692213	SNORD110	small nucleolar RNA, C/D box 110	1859.57	1903.81	1311.4	2135.97	0	4546.72	1866.89	640.2	4056.86	1189.37	0	2112.92	0	2742.67	1534.01	0	3067.91	1607.78	0	2556.56	0	1786.52	2247.98	1370.53	557.874	0	610.058	583.825	538.286	636.157	999.135	0	770.257	965.438	2016.18	1078.37	2355.23	1336.47	3487	0	0	0	0	481.086	605.326	774.859
NR_003195	767579	SNORD114-3	small nucleolar RNA, C/D box 114-3	0	0	0	0	0	0	0	0	0	0	0	0	0	1525.77	0	0	0	0	0	0	0	0	0	0	0	0	0	0	0	0	0	0	0	0	0	0	0	0	0	0	0	0	0	0	0	0
NR_001291	338433	SNORD115-1	small nucleolar RNA, C/D box 115-1	0	0	0	0	443.304	461.554	0	0	0	121.061	0	16.7294	0	0	0	148.547	19.1465	0	0	20.5718	0	22.8197	46.4824	111.862	95.3052	111.384	0	19.3516	33.1378	109.923	0	0	0	0	0	0	0	161.993	87.3376	0	0	0	0	77.7673	0	0
NR_003302_dup2	100033447	SNORD115-10	small nucleolar RNA, C/D box 115-10	0	0	0	2319.08	491.251	1726.12	0	0	0	0	0	204.025	0	0	414.047	0	442.652	0	156.983	0	402.046	526.341	21.0229	0	313.75	0	0	0	14.9972	0	0	449.044	410.286	0	59.2435	0	0	396.34	0	0	0	0	417.265	129.035	0	0
NR_003303_dup1	100033448	SNORD115-11	small nucleolar RNA, C/D box 115-11	0	34.1113	0	374.664	299.055	344.334	47.9776	0	0	240.697	148.9	95.7292	83.6209	67.233	218.097	49.5156	142.535	86.4013	116.676	54.8582	40.4063	73.5302	46.4824	67.1172	60.36	66.8302	66.8728	170.939	202.942	69.6178	59.5715	0	83.3782	86.6832	72.1164	57.3507	120.425	265.939	165.006	72.0677	0	89.1278	0	25.9224	90.1294	0
NR_003305	100033450	SNORD115-13	small nucleolar RNA, C/D box 115-13	0	0	0	0	443.304	461.554	0	0	0	121.061	0	16.7294	0	0	0	148.547	19.1465	0	0	20.5718	0	22.8197	46.4824	111.862	95.3052	111.384	0	19.3516	33.1378	109.923	0	0	0	0	0	0	0	161.993	87.3376	0	0	0	0	77.7673	0	0
NR_003306	100033451	SNORD115-14	small nucleolar RNA, C/D box 115-14	0	0	0	579.769	467.858	267.427	0	0	0	0	0	204.025	0	0	414.047	0	442.652	0	156.983	0	0	526.341	21.0229	0	0	0	0	0	14.9972	0	0	0	0	0	59.2435	0	0	132.113	0	0	0	0	0	129.035	0	0
NR_003307	100033453	SNORD115-15	small nucleolar RNA, C/D box 115-15	0	168.846	0	69.9021	489.265	510.542	0	0	0	491.607	0.005059	6.36432	0	0	0	0	7.72685	0	0	0	0	499.015	439.164	0.005936	0	364.534	0	0	156.761	361.273	0	898.081	204.14	1009.16	0.00017	69.1064	156.698	0.003915	0	0	0	0	0	0	38.1426	50.6966
NR_003308	100033454	SNORD115-16	small nucleolar RNA, C/D box 115-16	0	0	0	0	443.304	461.554	0	0	0	121.061	0	16.7294	0	0	0	148.547	19.1465	0	0	20.5718	0	22.8197	46.4824	111.862	95.3052	111.384	0	19.3516	33.1378	109.923	0	0	0	0	0	0	0	161.993	87.3376	0	0	0	0	77.7673	0	0
NR_003309_dup2	100033455	SNORD115-17	small nucleolar RNA, C/D box 115-17	0	0	0	175.126	422.195	439.575	0	0	0	0	0	334.587	0	0	249.903	0	127.643	0	0	0	121.219	0	0	111.862	0	0	100.309	96.7579	0	109.923	0	0	0	0	0	0	190.144	323.987	87.3376	251.665	0	118.837	125.212	77.7673	0	0
NR_003294	100033437	SNORD115-2	small nucleolar RNA, C/D box 115-2	0	0	0	0	0	0	0	0	0	0	0	334.587	0	0	0	0	0	0	0	0	0	0	382.796	0	0	334.151	0	0	272.899	0	0	0	0	0	0	0	0	0	0	0	0	0	0	0	0	0
NR_003312	100033460	SNORD115-20	small nucleolar RNA, C/D box 115-20	0	0	0	525.379	0	439.575	0	0	0	299.091	0	0	0	0	0	0	0	0	0	0	0	0	0	0	0	33.4151	0	0	0	0	0	0	0	0	0	0	0	0	0	0	0	0	0	0	0	0
NR_003313	100033603	SNORD115-21	small nucleolar RNA, C/D box 115-21	0	168.846	0	69.9021	0	4.2e-05	0	0	0	493.662	0.005059	6.36432	0	0	0	0	7.72685	0	0	0	0	0	0	0	0	0	0	0	156.761	0	0	0.004657	204.14	0	414.704	69.1064	156.698	0	0	0	0	0	0	0	38.1426	50.6966
NR_003314	100033799	SNORD115-22	small nucleolar RNA, C/D box 115-22	0	0	0	374.664	199.37	295.492	47.9776	0	0	119.636	110.72	16.7294	83.6209	67.233	218.097	0	80.8407	38.4006	56.7615	20.5718	40.4063	22.8197	0	67.1172	28.5916	66.8302	33.4364	138.686	122.805	36.641	0	0	37.057	86.6832	32.0517	0	57.0433	124.195	84.4263	72.0677	0	0	0	25.9224	57.9403	0
NR_003343	100033802	SNORD115-26	small nucleolar RNA, C/D box 115-26	0	34.1113	0	374.664	299.055	344.334	47.9776	0	0	240.697	148.9	95.7292	83.6209	67.233	218.097	49.5156	142.535	86.4013	116.676	54.8582	40.4063	73.5302	46.4824	67.1172	60.36	66.8302	66.8728	170.939	202.942	69.6178	59.5715	0	83.3782	86.6832	72.1164	57.3507	120.425	265.939	165.006	72.0677	0	89.1278	0	25.9224	90.1294	0
NR_003295	100033440	SNORD115-3	small nucleolar RNA, C/D box 115-3	0	0	0	0	0	0	0	0	0	0	0	0	0	0	0	445.64	0	0	0	0	0	0	0	0	0	0	0	290.274	0	0	0	0	0	0	0	0	285.216	0	0	0	0	0	0	0	0	0
NR_003345	100033804	SNORD115-30	small nucleolar RNA, C/D box 115-30	0	0	0	1576.14	422.195	439.575	0	0	0	0	0	0	0	0	0	0	0	0	0	617.155	0	0	382.796	0	0	0	601.855	290.274	0	0	0	405.201	0	0	0	0	570.433	0	262.013	0	0	0	0	0	0	0
NR_003346	100033805	SNORD115-31	small nucleolar RNA, C/D box 115-31	0	0	0	0	0	0	0	0	0	0	0	0	0	0	0	0	0	384.006	0	0	0	0	0	0	0	0	0	0	0	0	0	0	0	0	0	0	0	0	0	0	0	0	0	0	0	0
NR_003347	100033806	SNORD115-32	small nucleolar RNA, C/D box 115-32	459.831	0	0	1576.14	2110.97	2637.45	479.776	991.139	0	897.273	343.615	669.175	0	0	0	1336.92	0	0	0	308.577	0	456.394	765.592	335.586	285.916	0	300.928	1161.09	818.698	329.769	476.572	0	370.57	0	0	0	570.433	971.96	262.013	0	0	1069.53	0	233.302	289.702	0
NR_003348	100033807	SNORD115-33	small nucleolar RNA, C/D box 115-33	459.831	614.004	0	3677.66	844.389	2197.88	479.776	0	502.947	2093.64	687.23	1003.76	0	0	0	445.64	0	0	567.615	0	363.657	0	1531.18	335.586	571.831	1002.45	2106.49	870.821	545.799	329.769	476.572	405.201	370.57	0	0	1548.47	1426.08	971.96	1048.05	754.995	458.184	713.022	0	233.302	579.403	0
NR_003349	100033808	SNORD115-34	small nucleolar RNA, C/D box 115-34	0	1.78298	0	4.65605	1.79219	3.3e-05	0	0	0	1.82	773.125	5.24862	0	0	0	0	5.10935	384.006	0	0	0	2.0596	2.11033	671.167	0	1.84739	0	0	1.2908	0	0	0.002606	1.81124	0	0.000124	4.33138	1.82247	971.956	0	0	0	0	0	0	3.58792	3.37421
NR_003351_dup3	100033810	SNORD115-36	small nucleolar RNA, C/D box 115-36	0	34.1113	0	374.664	299.055	344.334	47.9776	0	0	240.697	148.9	95.7292	83.6209	67.233	218.097	49.5156	142.535	86.4013	116.676	54.8582	40.4063	73.5302	46.4824	67.1172	60.36	66.8302	66.8728	170.939	202.942	69.6178	59.5715	0	83.3782	86.6832	72.1164	57.3507	120.425	306.437	165.006	72.0677	0	89.1278	0	25.9224	90.1294	0
NR_003353	100033812	SNORD115-38	small nucleolar RNA, C/D box 115-38	459.831	0	0	2101.52	1266.58	0	0	0	0	0	0	1003.76	0	672.33	0	0	382.929	0	0	308.577	0	456.394	382.796	0	285.916	334.151	0	0	0	0	0	0	0	908.11	320.517	516.156	0	485.98	0	377.498	0	356.511	0	233.302	289.702	0
NR_003354	100033813	SNORD115-39	small nucleolar RNA, C/D box 115-39	0	34.1113	0	257.914	574.654	686.226	47.9776	0	0	240.697	72.5409	53.9057	0	67.233	218.097	49.5156	99.9871	38.4006	116.676	54.8582	363.657	73.5302	46.4824	67.1172	60.36	367.566	33.4364	138.686	475.841	32.9769	0	0	37.057	540.738	32.0517	57.3507	120.425	178.193	74.029	72.0677	0	0	0	0	90.1294	0
NR_003296	100033441	SNORD115-4	small nucleolar RNA, C/D box 115-4	0	0	0	131.345	21.1097	21.9788	0	0	0	0	85.9038	128.259	0	0	0	0	19.1465	0	94.6024	102.859	0	22.8197	19.1398	0	0	0	0	0	13.645	0	0	0	0	0	53.4195	129.039	0	0	0	0	0	0	0	0	72.4254	95.1848
NR_003355	100033814	SNORD115-40	small nucleolar RNA, C/D box 115-40	0	0	0	1050.76	21.1097	461.554	0	0	0	320.455	0	351.317	0	0	0	0	19.1465	0	567.615	20.5718	0	22.8197	46.4824	335.586	0	0	601.855	19.3516	306.037	0	0	0	0	0	0	0	0	485.98	74.8608	0	0	0	0	0	0	0
NR_003356	100033815	SNORD115-41	small nucleolar RNA, C/D box 115-41	0	0	0	573.141	443.304	21.9788	0	0	0	21.3636	0	16.7294	0	0	68.1553	0	402.076	0	28.3807	20.5718	727.314	22.8197	46.4824	0	0	334.151	0	19.3516	33.1378	32.9769	0	0	370.57	495.333	0	0	285.216	0	0	411.816	458.184	0	0	0	0	0
NR_003357	100033816	SNORD115-42	small nucleolar RNA, C/D box 115-42	0	0	0	394.035	443.304	21.9788	0	0	0	0	85.9038	128.259	0	0	0	0	19.1465	0	94.6024	102.859	0	22.8197	19.1398	0	285.916	0	0	145.137	150.095	0	0	0	0	0	53.4195	129.039	142.608	121.495	0	0	0	0	0	0	72.4254	95.1848
NR_003358_dup3	100033817	SNORD115-43	small nucleolar RNA, C/D box 115-43	0	34.1113	0	374.664	299.055	344.334	47.9776	0	0	240.697	148.9	95.7292	83.6209	67.233	218.097	49.5156	142.535	86.4013	116.676	54.8582	40.4063	73.5302	46.4824	67.1172	60.36	66.8302	66.8728	170.939	202.942	69.6178	59.5715	0	83.3782	86.6832	72.1164	57.3507	120.425	346.936	165.006	72.0677	0	89.1278	0	25.9224	90.1294	0
NR_003359	100033818	SNORD115-44	small nucleolar RNA, C/D box 115-44	0	0	0	525.379	422.195	0	0	330.38	0	0	343.615	334.587	0	0	0	0	382.929	0	0	0	0	0	0	0	0	334.151	300.928	0	0	329.769	0	0	0	0	0	516.156	285.216	242.99	786.038	0	458.184	0	0	0	289.702	0
NR_003297	100033442	SNORD115-5	small nucleolar RNA, C/D box 115-5	0	46.1149	0	503.919	407.313	466.771	0.124968	0	0	321.271	202.659	130.701	112.853	90.1799	294.136	66.6894	190.616	117.691	158.233	74.2141	54.6415	97.2683	61.2043	90.2433	79.7973	88.1581	89.7775	229.163	269.9	91.5766	81.1993	0	113.293	118.748	98.379	77.8736	163.093	421.095	239.991	98.0053	0	65.2682	0	35.0825	122.712	0
NR_003298	100033443	SNORD115-6	small nucleolar RNA, C/D box 115-6	0	0	0	394.035	443.304	21.9788	0	0	0	0	85.9038	128.259	0	0	0	0	19.1465	0	94.6024	102.859	0	22.8197	19.1398	0	285.916	0	0	145.137	150.095	0	0	0	0	0	53.4195	129.039	142.608	121.495	0	0	0	0	0	0	72.4254	95.1848
NR_003300	100033445	SNORD115-8	small nucleolar RNA, C/D box 115-8	0	307.002	0	1050.76	422.195	439.575	0	0	0	0	0	0	0	0	0	0	0	0	0	0	0	0	0	0	0	0	601.855	290.274	0	0	476.572	0	0	0	0	0	285.216	0	262.013	0	0	0	0	0	0	0
NR_003301_dup2	100033446	SNORD115-9	small nucleolar RNA, C/D box 115-9	0	46.1149	0	503.919	407.313	466.771	0.124968	0	0	321.271	202.659	130.701	112.853	90.1799	294.136	66.6894	190.616	117.691	158.233	74.2141	54.6415	97.2683	61.2043	90.2433	79.7973	88.1581	89.7775	229.163	269.9	91.5766	81.1993	0	113.293	118.748	98.379	77.8736	163.093	394.981	239.991	98.0053	0	65.2682	0	35.0825	122.712	0
NR_003326	100033423	SNORD116-11	small nucleolar RNA, C/D box 116-11	0	0	0	0	0	0	211.752	293.416	0	0	0	0	0	0	0	0	0	160.025	118.933	129.318	0	0	0	0	0	0	0	130.047	0	0	0	0	0	0	0	0	0	0	0	156.065	0	0	0	0	0	0
NR_003328	100033425	SNORD116-13	small nucleolar RNA, C/D box 116-13	0	0	0	0	0	0	211.752	0	0	0	0	0	0	0	631.074	0	166.02	0	118.933	0	0	200.391	0	0	0	0	0	0	248.728	0	0	0	0	0	0	0	0	114.771	0	0	0	0	0	0	0	0
NR_003329	100033426	SNORD116-14	small nucleolar RNA, C/D box 116-14	88.1981	12.8693	0	1264.89	1127.78	2698.88	2001.06	1757.23	615.625	188.818	323.739	312.673	126.478	777.062	220.876	324.695	608.741	680.106	553.04	830.773	643.165	400.782	379.528	416.764	326.938	1081.84	154.988	469.613	559.638	1035.04	394.13	433.856	154.711	872.167	0	0	1495.28	1201.27	1211.48	806.335	280.559	0	153.047	232.397	0	59.1769
NR_003336	100033433	SNORD116-22	small nucleolar RNA, C/D box 116-22	685.985	760.512	814.72	2052.19	2243.9	4968.39	3105.7	4715.84	2646.11	1258.79	743.401	1598.11	3688.95	2369.09	2629.47	1750.3	1245.15	1365.55	614.489	2619.68	1710	601.174	1546.23	1585.62	1223.38	1767.28	1597.24	1376.84	1721.55	768.888	1018.17	1595.47	1160.33	2974.31	639.225	498.971	3169.99	2463.75	2279.01	863.559	612.715	832.712	255.078	605.542	600.018	645.566
NR_003337	100033434	SNORD116-23	small nucleolar RNA, C/D box 116-23	195.996	270.254	271.573	447.75	874.248	2024.16	635.256	1613.79	864.036	260.438	143.884	416.897	0	852.873	0	585.53	830.102	160.025	713.601	529.03	306.269	0	674.717	718.558	506.227	445.95	129.157	650.233	124.364	1182.91	591.195	335.889	928.268	751.406	0	427.689	598.112	700.103	1451.37	312.13	386.978	146.949	612.188	294.588	40.0012	322.783
NR_003339	100033436	SNORD116-25	small nucleolar RNA, C/D box 116-25	195.996	0	0	0	0	0	211.752	293.416	0	0	0	138.966	0	0	0	188.881	0	0	118.933	387.955	459.403	0	0	143.712	126.557	0	129.157	0	124.364	0	0	0	0	0	0	213.845	0	229.542	119.948	0	0	146.949	0	196.392	120.004	0
NR_003340	100033438	SNORD116-26	small nucleolar RNA, C/D box 116-26	0	107.683	227.541	374.775	0	153.74	356.576	494.477	0	109.465	120.381	116.154	264.216	237.818	0	0	139.488	133.805	199.019	108.2	128.202	337.244	142.007	120.574	319.82	0	108.385	439.249	0	249.517	164.617	140.333	0	156.994	110.46	357.359	0	292.513	405.909	130.368	162.049	122.712	0	328.841	0	0
NR_003341	100033439	SNORD116-27	small nucleolar RNA, C/D box 116-27	0	0	0	0	0	0	211.752	0	0	0	0	0	0	0	0	188.881	0	0	0	129.318	0	200.391	0	143.712	126.557	0	258.313	130.047	124.364	443.589	0	0	0	0	0	0	0	114.771	119.948	0	0	0	0	98.196	0	0
NR_003360	100033821	SNORD116-29	small nucleolar RNA, C/D box 116-29	0	0	0	790.989	0	0	0	0	0	0	0	0	0	0	561.693	0	0	0	0	0	0	0	292.099	0	218.571	255.932	0	0	0	0	0	0	0	0	0	0	0	381.441	0	0	343.324	0	0	174.552	0	0
NR_003684	100113378	SNORD119	small nucleolar RNA, C/D box 119	0	0	0	0	0	0	0	0	0	0	0	0	0	0	0	0	0	0	0	0	0	0	0	0	0	0	117.863	119.076	0	0	0	0	0	0	120.378	0	0	105.436	0	0	0	0	0	89.4951	0	0
NR_003030	692057	SNORD12	small nucleolar RNA, C/D box 12	0	0	0	0	0	228.828	260.656	0	0	0	0	0	0	0	0	0	0	0	0	0	0	0	0	355.656	0	182.688	0	0	0	0	0	0	0	233.799	0	0	0	0	0	0	0	0	0	121.896	0	0
NR_003693	100113391	SNORD126	small nucleolar RNA, C/D box 126	0	0	218.675	0	0	0	0	0	0	105.269	0	0	0	0	0	0	0	0	0	0	0	0	0	0	0	0	0	0	0	0	0	0	0	0	0	0	0	0	0	0	0	0	0	0	0	0
NR_003695	100113393	SNORD12B	small nucleolar RNA, C/D box 12B	0	0	0	0	0	0	0	94.8119	0	0	0	0	0	0	0	0	0	0	0	0	0	0	0	0	0	0	0	0	0	0	124.828	0	0	0	0	0	0	0	79.0576	0	0	92.7856	0	0	76.8094	0
NR_002433	26765	SNORD12C	small nucleolar RNA, C/D box 12C	0	416.439	864.935	0	0	0	0	0	0	0	0	0	0	0	0	0	0	0	0	0	0	0	0	0	0	0	0	0	0	0	0	0	0	0	0	0	0	0	0	0	0	0	0	0	0	0
NR_002440	595097	SNORD16	small nucleolar RNA, C/D box 16	151.996	199.091	420.891	0	0	141.945	165.208	114.587	167.733	202.749	111.278	107.334	243.948	0	0	146.369	258.304	247.317	91.9886	0	118.539	312.446	0	334.742	98.8108	0	100.309	101.868	0	0	152.078	129.66	119.593	145.058	0	165.08	92.5309	181.344	188.421	0	149.85	113.35	117.838	76.0142	185.287	0
NR_002441	595098	SNORD18A	small nucleolar RNA, C/D box 18A	0	0	0	0	0	0	0	0	0	995.312	0	0	0	2365.51	0	0	0	0	0	0	0	0	0	0	0	2145.59	0	990.054	0	0	0	0	0	0	0	0	0	0	0	0	0	0	0	0	0	0
NR_004397	677850	SNORD1C	small nucleolar RNA, C/D box 1C	0	0	0	0	0	661.269	698.675	0	0	0	0	0	0	0	0	0	0	0	0	0	546.123	0	0	0	0	0	0	0	0	0	0	0	0	0	0	0	0	0	0	0	0	0	0	0	0	0
NR_000006	6083	SNORD21	small nucleolar RNA, C/D box 21	560.951	368.123	0	640.545	666.447	526.199	404.526	700.821	412.265	124.327	137.188	529.85	602.83	1355.4	300.782	0	475.454	152.552	453.599	493.208	876.208	1148.26	322.229	137.133	362.702	710.169	369.756	124.32	1070.65	282.642	187.811	0	147.496	716.214	126.037	203.817	456.239	109.906	458.913	446.208	553.618	280.07	728.957	561.864	114.377	461.829
NR_002447	26820	SNORD24	small nucleolar RNA, C/D box 24	0	634.604	0	0	0	0	0	0	0	0	0	0	0	0	0	0	0	0	0	0	0	0	749.326	0	0	0	0	0	0	0	999.135	850.583	0	0	0	1078.37	588.807	0	0	0	0	0	796.523	0	0	0
NR_002564	9302	SNORD26	small nucleolar RNA, C/D box 26	0	634.604	0	1067.99	0	0	0	0	0	0	0	0	0	0	0	0	0	0	587.165	0	0	0	0	0	0	0	610.058	0	0	0	0	0	0	0	672.06	0	0	0	996.287	0	0	0	0	0	0	774.859
NR_002563	9301	SNORD27	small nucleolar RNA, C/D box 27	0	1766.53	1811.33	0	0	0	0	2579.25	1388.98	1615.52	0	1969.59	0	0	4234.8	0	0	1122.57	1625.05	2654.93	2076.74	0	0	0	0	876.487	0	0	0	853.831	1390.19	1190.02	1067.32	0	1877.86	0	0	1753.17	1330.35	0	0	1061.75	0	1335.4	844.602	1063.9
NR_002562	9300	SNORD28	small nucleolar RNA, C/D box 28	0	634.604	1311.4	0	0	0	933.446	0	0	0	0	0	0	1371.34	0	0	0	0	0	0	0	0	0	0	557.874	0	0	0	1076.57	0	0	0	0	0	672.06	0	0	445.491	0	0	0	0	0	481.086	605.326	774.859
NR_002559	9297	SNORD29	small nucleolar RNA, C/D box 29	0	0	3984.34	0	2798.39	0	0	0	0	3432.12	0	0	0	0	0	0	0	0	0	0	0	0	0	0	1556.09	0	0	0	4609.34	0	3115.83	2695.32	0	0	0	0	0	1143.06	0	0	2818.3	0	0	1467.56	1886.55	0
NR_002561	9299	SNORD30	small nucleolar RNA, C/D box 30	0	0	0	0	0	0	0	0	0	0	0	0	0	0	0	0	0	0	0	0	1291.43	0	0	0	0	0	0	0	0	0	0	0	0	0	0	0	0	0	0	0	0	0	0	0	0	0
NR_000021	26819	SNORD32A	small nucleolar RNA, C/D box 32A	919.661	2149.01	1921.51	1050.76	844.389	439.575	959.553	1321.52	502.947	0	343.615	334.587	752.589	0	1499.42	891.281	382.929	768.012	851.422	1234.31	1090.97	1369.18	765.592	2013.52	857.747	334.151	902.783	580.547	818.698	659.537	0	810.403	1111.71	454.055	1282.07	2064.63	285.216	1943.92	1572.08	1132.49	458.184	1426.04	1878.18	2333.02	1158.81	1522.96
NR_000019	26817	SNORD34	small nucleolar RNA, C/D box 34	0	1740.44	0	0	0	0	0	0	0	0	0	0	0	0	0	0	0	0	0	0	0	0	0	0	0	0	0	0	0	0	0	0	0	0	0	0	0	1034.03	0	0	0	0	0	0	0	0
NR_000018	26816	SNORD35A	small nucleolar RNA, C/D box 35A	956.663	211.016	0	364.521	288.46	302.149	0	468.191	0	0	0	686.501	1036.76	929.27	1034.12	0	803.715	263.106	0	848.358	501.178	321.517	0	699.513	202.235	0	209.408	617.749	585.987	469.626	0	0	254.171	618.976	218.437	352.595	196.14	0	188.556	515.17	0	242.861	254.27	803.357	593.629	1316.48
NR_001285	84546	SNORD35B	small nucleolar RNA, C/D box 35B	0	195.394	0	0	0	0	0	0	0	0	0	211.72	0	0	0	0	248.821	0	0	196.38	0	0	251.251	216.34	188.171	0	0	383.844	0	218.737	300.799	0	0	0	0	0	181.62	0	175.977	238.217	0	0	0	148.836	0	244.036
NR_002448	26815	SNORD36A	small nucleolar RNA, C/D box 36A	0	883.263	0	0	0	0	0	0	0	807.758	0	0	0	0	0	0	0	0	0	0	0	0	0	0	0	0	0	2399.97	730.723	0	0	1190.02	0	0	0	0	0	0	1330.35	0	0	0	0	0	0	0
NR_000016	26813	SNORD36C	small nucleolar RNA, C/D box 36C	0	1549.91	0	0	0	0	0	0	0	0	0	0	0	0	0	0	0	0	0	0	1808.45	0	0	0	0	0	0	0	0	0	2455.69	0	0	0	0	0	0	0	0	0	0	0	0	0	0	0
NR_001456	94162	SNORD38A	small nucleolar RNA, C/D box 38A	0	0	0	0	0	1411.13	0	0	0	0	0	0	0	0	0	0	0	0	0	0	0	0	0	2116	832.259	0	0	0	0	0	0	0	0	0	0	0	0	640.681	733.408	0	0	0	0	1490.76	0	0
NR_002751	26810	SNORD41	small nucleolar RNA, C/D box 41	4727.79	0	0	0	0	0	0	2098.39	1716.59	995.312	0	0	0	0	0	0	0	0	1012.11	0	0	1474.98	0	0	0	0	0	0	0	0	0	0	0	0	0	0	0	0	0	1390.5	1609.89	0	0	831.726	0	0
NR_002750	26806	SNORD44	small nucleolar RNA, C/D box 44	0	0	0	0	0	4708.58	0	0	0	0	0	0	0	0	0	0	0	0	2942.23	0	0	0	0	0	0	0	0	0	0	0	0	0	0	0	0	0	0	0	0	8412.24	0	0	0	0	0	0
NR_002749	26805	SNORD45A	small nucleolar RNA, C/D box 45A	0	502.351	525.952	0	344.245	359.714	398.74	275.042	0	0	0	0	616.637	0	0	365.819	0	0	464.492	252.484	297.994	378.726	317.942	276.135	237.776	278.237	0	0	455.645	0	388.398	0	605.663	0	0	420.846	233.468	205.852	660.026	0	375.639	290.203	0	0	236.189	0
NR_003042	692085	SNORD45C	small nucleolar RNA, C/D box 45C	0	0	0	0	0	0	0	0	0	0	0	0	0	0	0	0	0	0	0	464.673	546.123	666.659	0	0	0	0	447.779	430.298	0	0	0	0	0	0	0	0	0	683.352	0	0	0	0	0	0	0	0
NR_000024	94161	SNORD46	small nucleolar RNA, C/D box 46	328.622	1830.61	0	374.775	437.794	768.699	891.439	247.239	181.258	547.323	240.762	232.309	792.648	951.274	0	474.756	278.977	1070.44	0	649.199	897.414	674.487	568.027	602.872	319.82	375.905	541.926	658.874	315.728	499.034	493.85	0	0	941.964	883.679	714.718	800.753	975.042	811.818	1303.68	1296.4	736.272	1148.74	1068.73	501.355	676.097
NR_002746	26802	SNORD47	small nucleolar RNA, C/D box 47	756.914	0	0	0	710.118	0	768.72	1055.09	0	0	0	566.294	0	0	0	739.292	0	0	0	0	1212.44	0	616.062	0	0	0	0	0	0	0	0	0	0	0	0	0	0	1118.6	412.071	0	0	605.324	0	389.049	0	0
NR_002744	26800	SNORD49A	small nucleolar RNA, C/D box 49A	0	0	0	0	0	0	0	949.303	0	0	0	0	0	0	0	0	0	0	0	0	0	0	0	0	0	0	0	0	0	0	0	0	0	0	0	0	0	0	0	0	0	0	0	0	0	0
NR_002743	26799	SNORD50A	small nucleolar RNA, C/D box 50A	0	634.604	0	0	0	909.343	0	0	0	0	0	0	0	2742.67	0	0	766.977	0	1174.33	1278.28	0	893.258	0	0	0	650.138	0	0	0	636.157	0	0	0	0	0	0	0	0	0	0	0	754.578	1593.05	0	0	0
NR_002437	26795	SNORD54	small nucleolar RNA, C/D box 54	0	0	0	0	0	0	0	0	0	0	0	0	6283.22	0	0	0	0	0	0	0	0	0	0	0	1944.71	0	0	4378.24	0	2179.08	0	0	0	0	0	4266.9	0	0	0	0	0	0	0	0	0	0
NR_000015	26811	SNORD55	small nucleolar RNA, C/D box 55	3095.43	4247.12	5837.84	3563.34	4919.04	4055.16	5149.1	3531.18	1125.89	5265.26	2407.13	5507.59	5179.89	4577.3	10240.5	4053.5	6809.75	4488.3	6539.17	5696.66	10029.1	4931.54	827.652	6105.81	3080.61	5024.65	4068.63	4536.43	3573.57	2104.33	1114.9	2852.39	4292.51	11885	3753.89	6020.89	8522.43	4874.68	4934.77	1767.61	2088.45	2534.2	2675.71	3217.57	2703.41	7746.65
NR_002739	26793	SNORD56	small nucleolar RNA, C/D box 56	0	987.371	0	0	1372.49	0	0	949.303	0	896.358	0	0	0	2115.37	0	1401.64	0	0	0	0	0	0	0	0	832.259	0	0	889.877	0	942.716	0	0	0	0	0	0	1811.66	1922.04	733.408	0	0	1191.4	0	0	945.016	0
NR_002738	26792	SNORD57	small nucleolar RNA, C/D box 57	0	0	0	0	0	1262.54	0	859.751	0	2423.27	0	0	0	0	0	0	1052.25	0	0	0	0	0	0	0	752.46	0	839.73	0	730.723	0	0	0	0	0	0	1503.84	0	0	665.175	0	0	0	0	667.698	0	0
NR_002737	26789	SNORD59A	small nucleolar RNA, C/D box 59A	0	0	0	1067.99	0	0	0	640.2	0	0	0	0	0	0	0	0	0	0	0	0	0	0	0	0	0	0	0	0	0	0	0	0	0	965.438	0	0	0	445.491	0	0	0	0	0	0	0	0
NR_002736	26788	SNORD60	small nucleolar RNA, C/D box 60	0	832.739	0	0	0	397.565	0	602.781	0	0	0	302.06	681.14	0	0	0	0	0	0	279.048	0	0	0	304.145	260.673	304.794	273.003	0	0	0	430.128	0	334.869	408.701	0	0	0	447.172	0	0	0	0	338.103	0	0	689.913
NR_002735	26787	SNORD61	small nucleolar RNA, C/D box 61	0	0	0	0	0	0	0	778.946	0	0	0	0	1924.26	0	0	0	1891.52	0	728.668	0	931.339	0	0	0	0	792.886	0	0	1318.71	0	1244.58	1063.46	0	0	0	1345.29	729.892	533.493	603.704	0	0	0	0	598.168	755.173	0
NR_002914_dup1	26786	SNORD62A	small nucleolar RNA, C/D box 62A	0	0	0	0	0	0	0	0	0	104.867	0	114.417	0	0	258.529	0	0	0	0	106.045	0	0	0	0	0	0	0	0	0	0	0	0	0	0	0	176.297	0	0	0	0	0	0	0	0	0	0
NR_002913	26785	SNORD63	small nucleolar RNA, C/D box 63	1958.17	0	0	0	0	0	0	0	0	0	0	0	0	0	0	0	0	0	0	0	0	0	0	0	0	0	0	0	0	0	0	0	0	0	0	0	1260.97	0	0	0	0	0	0	1038.79	1325.89	0
NR_003054	692106	SNORD65	small nucleolar RNA, C/D box 65	1146.02	0	1625.3	0	0	0	0	778.946	0	0	0	0	0	0	0	0	0	0	0	0	0	0	0	850.555	0	0	0	719.608	1318.71	0	0	0	0	0	839.336	0	0	533.493	0	0	0	0	999.519	0	0	0
NR_003055	692107	SNORD66	small nucleolar RNA, C/D box 66	0	0	0	0	0	0	0	0	914.641	0	0	0	0	1234.02	0	0	692.354	720.97	0	0	0	0	0	0	0	589.483	0	0	974.05	577.342	0	0	0	0	0	0	0	0	0	0	844.018	0	0	0	0	0
NR_003056	692108	SNORD67	small nucleolar RNA, C/D box 67	0	79.5581	153.522	0	83.0005	175.51	65.5408	45.4527	63.156	41.7689	44.2214	0	0	0	0	223.762	208.943	145.755	0	0	0	0	0	0	84.6067	94.094	41.856	41.485	80.847	47.6249	0	51.6665	95.7701	54.7686	39.5572	184	0	80.2084	122.468	0	0	87.3289	132.366	31.5481	76.9791	0
NR_002450	606500	SNORD68	small nucleolar RNA, C/D box 68	1273.5	883.263	1811.33	2946.92	1227.3	1262.54	1254.4	859.751	0	0	2004.12	0	2146.66	7579.76	2117.4	0	1052.25	1122.57	1625.05	1769.95	1038.37	1204.5	3034.63	2845.37	752.46	876.487	0	799.991	2192.17	853.831	1390.19	1190.02	0	0	0	0	3251.39	1753.17	1330.35	1107.37	1296.27	1061.75	0	667.698	1689.2	2127.8
NR_003057	692109	SNORD69	small nucleolar RNA, C/D box 69	0	0	0	866.794	0	0	0	0	0	0	0	0	0	0	0	739.292	0	0	0	0	0	0	616.062	555.415	0	535.08	0	0	0	0	0	0	0	0	0	0	0	0	412.071	0	0	0	0	0	487.771	0
NR_003058	692110	SNORD70	small nucleolar RNA, C/D box 70	0	0	0	0	0	0	0	0	303.134	0	0	0	0	0	0	0	0	0	0	0	0	0	0	0	0	0	0	0	0	0	0	0	0	0	0	0	0	0	164.97	0	0	0	0	0	0	0
NR_003059	692111	SNORD71	small nucleolar RNA, C/D box 71	0	422.031	0	0	0	0	0	468.191	0	209.735	0	0	0	0	0	0	0	526.212	195.08	212.09	250.589	0	0	0	0	0	209.408	205.916	390.658	234.813	650.509	0	254.171	0	0	0	0	177.66	0	0	0	0	254.27	160.671	0	0
NR_003942	692196	SNORD76	small nucleolar RNA, C/D box 76	1014.81	1358.66	707.389	0	467.858	972.462	3159.67	2536.26	1663.33	987.272	380.448	741.91	831.885	742.264	828.094	492.289	0	425.433	941.896	2048.43	1608.18	501.277	1261.38	1481.77	941.251	366.56	663.77	959.775	899.831	1445.09	0	449.044	820.573	504.581	1066.38	2860.26	1261.65	2378.04	2862.7	1255.22	1012.88	791.089	1669.06	2322.63	1605.23	420.479
NR_003939	26770	SNORD79	small nucleolar RNA, C/D box 79	0	0	0	0	0	486.231	0	0	0	0	0	0	0	0	0	0	0	0	0	0	0	0	0	0	0	0	0	0	0	0	0	0	0	0	0	0	0	0	0	0	0	0	0	0	0	0
NR_002916	319103	SNORD8	small nucleolar RNA, C/D box 8	137.885	47.6835	281.585	0	103.721	109.616	0	54.8581	153.791	149.665	159.353	101.276	85.0661	163.96	86.1674	135.63	125.307	58.4844	265.343	143.979	284.039	74.6147	320.868	218.537	50.1614	56.4681	99.6489	99.0531	0	114	0	61.9964	0	132.409	95.2527	74.5201	89.7419	189.487	96.6796	55.1564	0	52.6547	53.3755	74.9654	137.139	59.2197
NR_003940	26774	SNORD80	small nucleolar RNA, C/D box 80	0	987.371	2018.54	0	2744.99	4233.38	2770.35	0	0	0	0	0	0	0	0	0	0	0	906.623	0	0	0	1119.34	0	0	0	0	0	0	0	0	1331.65	0	0	0	0	0	2562.72	733.408	0	0	0	0	0	0	0
NR_000027	116937	SNORD83A	small nucleolar RNA, C/D box 83A	186.984	245.416	0	213.515	0	175.4	0	140.164	0	124.327	0	0	0	271.08	300.782	540.492	158.485	152.552	0	0	0	0	161.114	137.133	120.901	0	0	124.32	0	0	0	160.071	0	0	252.074	0	0	109.906	344.185	148.736	0	0	145.791	93.644	0	153.943
NR_000028	116938	SNORD83B	small nucleolar RNA, C/D box 83B	0	135.291	285.378	0	183.933	387.014	0	153.891	0	136.698	0	292.281	0	0	331.784	0	174.308	0	0	0	0	210.296	176.99	301.905	132.768	0	135.656	136.326	0	155.041	207.278	0	0	0	139.115	0	377.266	120.086	0	0	0	0	0	0	0	0
NR_003066	692200	SNORD85	small nucleolar RNA, C/D box 85	0	0	0	0	0	0	0	0	0	0	718.764	0	0	0	0	0	0	0	0	0	750.202	0	749.326	685.266	0	0	0	0	0	0	0	0	0	0	0	0	0	0	0	0	0	0	0	0	0	0
NR_002598	641648	SNORD87	small nucleolar RNA, C/D box 87	0	0	0	0	0	0	0	0	0	0	0	0	0	0	0	0	0	0	527.668	0	0	0	0	0	0	0	0	0	0	0	0	761.864	0	0	0	0	0	0	0	0	0	0	712.454	0	0	0
NR_003067	692202	SNORD88A	small nucleolar RNA, C/D box 88A	0	0	0	195.375	152.239	0	0	128.683	0	0	0	0	0	0	274.982	0	0	0	0	0	267.284	0	0	0	0	0	0	114.257	0	0	0	0	0	0	0	0	0	0	105.541	0	0	0	0	85.6982	313.71	0
NR_003069	692204	SNORD88C	small nucleolar RNA, C/D box 88C	0	112.265	0	195.375	0	160.352	371.246	257.367	0	114.008	0	0	0	247.98	274.982	0	145.294	139.521	207.491	225.611	133.642	0	0	0	0	0	0	0	0	0	0	0	0	0	230.412	186.341	208.707	101.316	0	135.965	0	0	266.33	171.396	104.57	0
NR_003070	692205	SNORD89	small nucleolar RNA, C/D box 89	84.9597	183.866	114.991	105.64	152.109	161.019	299.605	380.327	47.5458	193.767	67.9677	161.241	239.491	94.5167	0	127.271	40.1666	148.932	227.181	123.122	145.651	188.74	123.575	0	66.0779	180.465	65.105	64.2973	94.2517	146.775	90.6236	198.798	73.7896	333.993	151.509	231.847	260.36	220.149	319.319	173.618	167.7	66.7563	100.678	147.613	150.194	112.971
NR_003029	692053	SNORD9	small nucleolar RNA, C/D box 9	124.015	164.224	0	0	0	0	273.235	94.8119	137.258	168.46	0	0	0	0	0	119.95	107.005	0	0	247.672	0	516.588	109.185	92.5676	248.06	96.4174	0	83.7696	80.6333	192.654	124.828	106.854	0	0	83.6377	0	76.5652	76.4972	0	98.2757	121.909	0	0	63.0343	76.8094	102.919
NR_003073	692208	SNORD91B	small nucleolar RNA, C/D box 91B	0	211.016	442.976	364.521	0	0	0	234.096	0	0	0	228.834	518.379	464.635	0	0	267.905	0	195.08	212.09	250.589	0	0	0	404.471	236.936	209.408	0	0	0	0	276.88	0	0	218.437	0	0	0	188.556	0	0	0	254.27	0	0	263.296
NR_003074	692209	SNORD92	small nucleolar RNA, C/D box 92	0	0	0	0	0	0	0	0	0	0	0	0	0	0	0	0	0	0	0	0	0	0	0	189.046	0	0	0	0	0	0	0	0	0	0	0	0	0	0	0	0	0	0	0	0	0	0
NR_002592	619571	SNORD96A	small nucleolar RNA, C/D box 96A	0	0	0	0	0	0	0	0	0	0	0	0	0	0	0	0	0	0	0	0	0	0	0	0	0	0	0	799.991	0	0	0	0	0	0	0	0	0	0	0	0	0	0	0	0	0	0
NR_003077	692212	SNORD99	small nucleolar RNA, C/D box 99	560.213	0	0	0	518.581	0	578.219	0	0	362.37	0	0	0	0	915.419	0	0	0	0	0	444.756	0	0	0	344.493	804.689	366.292	352.806	659.835	0	0	0	0	561.069	0	634.435	349.08	575.171	939.159	0	559.989	0	0	285.583	0	0
NM_153816	57231	SNX14	sorting nexin 14	7.86353	5.33126	5.39824	8.26146	3.83425	6.91188	7.61297	7.43543	6.95575	4.517	6.04308	5.22119	9.16972	6.88155	7.88014	3.67362	6.00761	5.27511	6.96336	3.94869	6.73231	10.3075	8.71085	2.19623	5.88764	5.58941	8.31761	4.27805	6.71009	6.18311	4.72559	7.52334	9.3002	4.54069	6.64005	3.13307	5.70778	3.91428	1.81281	4.31496	7.07258	4.78406	5.63981	6.72447	4.24513	6.96358
NM_138473	6667	SP1	Sp1 transcription factor	12.1501	6.31679	10.014	3.15602	4.97545	5.08437	12.3684	8.29772	10.6919	1.55424	1.94056	7.27073	8.61473	6.96588	7.40822	5.0999	3.85162	9.83062	7.80955	5.14718	9.79166	5.69736	8.1259	8.90797	7.07622	7.24852	6.81871	2.07757	1.09327	4.22332	8.7915	8.51454	8.32212	6.2763	6.37095	3.02466	7.06444	7.38797	4.09534	3.73708	6.26613	5.72672	7.35725	6.4402	4.04294	11.6975
NM_001127889	51324	SPG21	spastic paraplegia 21 (autosomal recessive, Mast syndrome)	16.7549	16.4979	12.0167	14.4839	16.1811	11.157	20.0945	17.6915	22.5539	15.3897	15.886	13.4423	14.522	8.36144	8.66643	12.2837	4.23121	20.4068	16.7209	18.3964	14.2113	22.8596	19.6079	20.5364	20.2843	13.5268	17.4077	12.5159	6.04314	10.1731	11.017	9.73626	14.2125	18.5127	17.4634	16.1159	14.1288	12.1349	10.0552	17.1931	14.4885	19.8551	22.3011	20.8092	13.6519	18.7673
NM_001142601	8877	SPHK1	sphingosine kinase 1	1.76856	1.1321	1.43639	0.860876	0.000937	0.000136	7.38602	6.06301	7.5351	0.127279	1.28828	1.1791	2.23793	0.800105	1.92259	4.55907	3.42319	2.02993	1.70643	0.024804	1.60896	0.076039	0.917179	0.612714	2.34595	0.978078	1.8871	1.55291	1.39446	1.12066	2.96931	0.588169	1.57589	3.62689	4.73258	4.1056	0.736517	0.483251	1.03309	1.05474	2.34998	2.22116	1.70062	1.66423	2.5482	1.53342
NM_003122	6690	SPINK1	serine peptidase inhibitor, Kazal type 1	7.44742	7.09321	2.41912	0.194109	0.098105	0	7.84841	5.10084	7.09955	7.84344	5.77513	4.93557	4.95231	3.28178	11.1192	0.728797	2.18043	0.43032	11.5709	4.28424	9.5844	15.6265	15.2027	10.0338	2.2323	0.708293	1.35531	4.02547	4.6377	2.90435	2.7535	0.948313	3.53172	10.6403	7.79979	2.55461	1.93603	6.68561	5.61604	4.71234	7.99632	8.96701	7.0267	2.48865	5.72738	2.0295
NM_001032367	6692	SPINT1	serine peptidase inhibitor, Kunitz type 1	2.08319	1.97778	0.641129	0.500251	0.857217	0.399363	0.961474	5.76332	10.4584	3.64273	0.001882	2.08309	5.1069	5.57762	6.12429	0.014656	3.69495	2.29134	2.85551	2.85478	3.19662	8.51852	4.90308	7.35379	2.8529	0.922015	2.32339	0.532969	2.34455	0.788125	3.00959	0.005484	1.17513	2.79099	4.55115	2.06473	0.000114	0.665973	0.410299	0.833515	2.43259	6.04161	2.70289	4.7858	4.86355	16.1306
NM_016950	50859	SPOCK3	sparc/osteonectin, cwcv and kazal-like domains proteoglycan (testican) 3	2.29495	2.43116	1.20327	16.6336	14.5234	13.2706	0	0.561903	0.456853	2.81993	3.36362	5.01625	3.67874	3.09592	3.5776	0.000128	1.69397	1.6176	2.04886	2.16935	1.39285	3.04921	3.87338	3.76506	1.36723	2.9148	2.70164	0.00069	1.95704	3.02189	2.10949	3.47972	2.57343	0.396415	0.2681	2e-06	2.12522	2.32753	1.70445	1.50217	2.23047	1.04218	0.436576	1.3652	0.415968	0.693497
NM_012445	10417	SPON2	spondin 2, extracellular matrix protein	5.02792	1.84417	2.09897	0.000206	0.697046	0.77902	20.8961	11.8832	17.5014	3.26093	0.000304	2.16768	4.01044	7.22878	5.65757	4.47201	3.71851	2.49248	3.79006	4.27307	2.98246	5.03872	4.86683	2.38465	2.34914	1.21973	1.36941	5.57138	1.91608	2.16353	2.16861	0.000345	0.000348	3.0818	3.13104	5.92611	0.000246	0.808439	1.00757	1.4797	1.4645	3.815	6.03582	5.84357	7.2519	14.168
NM_001040058	6696	SPP1	secreted phosphoprotein 1	15.1946	4.07983	8.58079	2.34665	2.31474	1.65854	23.2662	21.2117	25.6286	5.57601	7.11457	3.18229	6.33283	7.65728	6.50704	0.940506	0.267111	2.49117	8.9921	6.92119	3.94748	22.9283	12.643	17.3491	4e-06	0.163806	1.44164	2.67226	1.95163	1.40059	1.60532	0.932831	3.81672	2.88882	7.13863	2.7601	0.000348	1.01737	1.6e-05	4.11219	3.70087	6.75261	14.061	10.0784	8.56728	17.5752
NM_001014450	6705	SPRR2F	small proline-rich protein 2F	2.8772	0.804669	1.93306	0	0	0	7.67659	3.53683	6.31895	0.583356	0.124817	0.117884	4.37865	4.87744	4.46591	2.77731	4.6651	3.2526	8.97774	4.20778	4.21728	3.87721	1.26764	1.4014	0.270183	0	0.820354	0.270868	0.131656	0.251104	0.156007	0	0.145685	4.50582	5.17486	2.44469	0	0	0	0.475168	1.65406	1.76893	3.98702	2.47506	2.33375	28.6792
NM_006307	8406	SRPX	sushi-repeat containing protein, X-linked	13.107	7.78913	7.19756	0.383395	1.21139	0.551197	7.95814	5.77806	9.84114	3.75365	3.46365	2.90655	10.1773	11.263	10.0245	3.89561	6.01258	6.67168	5.65085	4.34532	2.79568	13.925	7.31025	0.984957	8.429	1.73175	5.28378	3.33885	3.40212	2.98403	0.988488	1.86644	3.09408	1.94316	5.83881	2.13552	0.846533	0.542533	1.80873	2.91303	4.60306	3.53397	5.56682	9.55338	5.61254	13.5046
NM_001254758	6484	ST3GAL4	ST3 beta-galactoside alpha-2,3-sialyltransferase 4	4.97434	4.45503	2.93141	5.02653	5.20733	0.212247	3.13686	1.13642	2.72757	2.43165	3.36843	3.35988	2.9003	4.54673	3.47101	9.04287	5.07516	3.16057	3.90993	3.60555	4.43193	4.50797	4.52257	1.52577	5.8967	4.82826	5.35834	3.39863	5.84022	2.28946	4.20248	0.003627	0.331383	4.25706	2.90527	4.80189	2.04374	2.80887	3.34883	5.10913	5.25411	4.47789	5.14758	5.4893	4.2459	5.96112
NM_001287000	30815	ST6GALNAC6	ST6 (alpha-N-acetyl-neuraminyl-2,3-beta-galactosyl-1, 3)-N-acetylgalactosaminide alpha-2,6-sialyltransferase 6	7.95955	10.2998	5.93339	2.6053	4.54875	1.82008	1.9963	11.3128	8.18995	3.94039	4.63465	4.17788	9.02846	7.59004	11.9743	10.9424	7.12542	5.14829	6.69897	8.49348	6.84829	4.8676	7.21971	4.99904	8.62248	6.22759	4.68096	4.39104	6.03112	5.75748	10.4916	10.3163	9.02748	9.02618	5.5293	5.71831	5.22327	5.95182	11.8443	8.47621	5.1677	7.55861	8.09726	8.44753	6.96391	7.85576
NM_139164	134429	STARD4	StAR-related lipid transfer (START) domain containing 4	10.9576	15.4006	12.8293	13.5083	12.9838	9.37207	10.3731	12.6655	12.6963	6.82761	8.18284	14.9949	17.2299	10.3448	11.5134	6.801	4.98287	24.1534	14.2689	17.1772	16.0136	13.703	12.5222	19.618	20.6891	17.0973	25.4114	11.2479	10.6544	10.5253	18.7533	18.915	21.3026	13.8341	13.5352	12.2487	16.7632	12.0336	15.2188	13.1617	16.3985	13.7131	13.6827	12.5385	16.0477	9.47834
NM_001271977	10494	STK25	serine/threonine kinase 25	6.16646	2.23005	7.06274	7.31775	2.95218	14.4715	4.38989	4.82554	5.75425	9.52469	8.15875	1.67208	2.81324	10.0581	15.853	15.2838	10.1972	2.90419	14.0644	12.7319	12.4381	6.11462	17.0088	10.3532	6.0547	4.7757	6.611	11.8046	14.8916	10.4846	16.124	15.5958	16.2053	6.84467	5.37814	6.18652	10.1296	15.5224	11.3139	8.94736	10.3877	11.2794	0.966206	5.37305	5.57258	5.39689
NM_001032386	6821	SUOX	sulfite oxidase	4.50732	5.06346	1.62522	3.26795	2.46267	1.72705	3.90595	2.11953	5.07994	2.60833	3.25352	9.8e-05	2.27141	3.40453	5.09729	7.18039	5.54879	4.1962	4.30061	2.71972	2.80393	2.63399	4.31186	1.38183	4.75938	2.34882	3.55893	4.03342	1.63615	4.01704	3.47868	2.48053	0.543902	4.83547	3.41279	4.95821	0.948526	0.940167	1.72199	4.60067	3.48848	4.61598	4.41497	6.25527	3.96217	3.76071
NM_006950	6853	SYN1	synapsin I	0.606557	2.11131	0.970417	6.35634	5.79426	6.60078	1.3238	1.04862	1.38959	2.81161	2.10699	2.91624	0.847484	1.07099	1.33897	1.97306	3.29913	0.000167	1.65198	1.44483	2.70695	1.59216	3.57119	2.9321	2.69174	3.27262	1.47763	1.93636	1.77016	1.98319	1.39704	1.32389	4.23841	2.28781	2.32503	2.15145	2.841	4.64744	2.68182	2.5585	0.001286	2.36972	1.47143	0.598714	0.763532	0.385847
NM_001193308	84958	SYTL1	synaptotagmin-like 1	0.000724	0.947604	1.78215	0.047996	0.000606	0.000629	2.32694	1.69513	2.81045	1.02629	0.653721	0.000793	2.26329	4.38701	3.53139	2.94879	2.91677	0.737236	1.8916	2.00461	2.463	3.53549	2.91418	2.35626	2.08571	1.6113	1.66093	1.61372	1.64285	1.41973	1.11429	0.672733	1.48324	1.18452	1.70889	0.904576	2.8e-05	0.000889	0.646596	1.42423	1.9988	2.44833	2.92318	3.97935	3.60727	2.06671
NM_005645	6884	TAF13	TAF13 RNA polymerase II, TATA box binding protein (TBP)-associated factor, 18kDa	15.5591	17.6282	16.4565	16.0373	12.7087	10.1439	10.9635	13.8221	13.5211	5.27216	5.33944	13.4511	15.0363	10.0675	11.6009	2.98837	4.70411	13.1601	12.974	14.9063	14.4572	14.6406	11.209	17.3152	15.8917	9.68576	11.5307	8.5181	9.68608	5.51928	15.6106	12.9705	13.5093	21.9012	18.3429	17.6236	22.1366	15.9889	20.2985	12.5689	25.1372	17.3868	15.6984	13.6735	12.8268	12.6684
NM_001113363	57533	TBC1D14	TBC1 domain family, member 14	6.56637	5.32874	6.88567	18.793	17.8758	19.2675	6.48088	6.92873	5.47174	7.26047	6.81527	5.874	6.65875	7.94628	8.36603	2.93571	1.16931	8.74134	5.3734	6.238	2.41678	4.14278	4.77881	4.67264	7.19891	7.1253	8.47041	3.05654	3.51815	2.66298	13.9293	11.2065	9.64628	8.93854	11.3118	4.91231	12.507	7.51655	7.72343	5.33964	7.19394	7.61023	6.87199	5.21227	3.5681	3.93305
NM_001143966	51256	TBC1D7	TBC1 domain family, member 7	3.727	2.04792	2.581	3.13059	3.7594	2.90683	2.61762	4.47027	3.02992	3.59525	4.73064	2.53448	2.74418	3.60712	3.41922	2.48825	1.56103	1.53372	2.3518	1.05913	2.77644	1.81601	0.000152	4.06691	3.82289	2.25105	3.49512	4.15567	2.75611	2.22586	1.39485	3.48447	3.63789	3.64672	2.51065	2.65519	5.33212	2.9958	4.31558	4.51349	1.6564	2.46103	3.76153	1.89538	2.4116	2.47036
NM_001077653	57057	TBX20	T-box 20	4.29272	1.68162	3.17602	0	0	0.088612	5.93649	4.63854	6.10523	1.27221	1.34424	1.76159	8.14463	6.70456	7.11406	0.440819	1.0831	1.81484	3.32088	2.52793	2.23147	5.91492	3.71264	2.47881	1.05076	0.254396	0.60937	0.93639	0.989762	0.411975	1.00401	0.934962	0.348041	2.77839	4.38908	2.82275	0.111735	3e-06	0.165102	1.43834	1.66731	3.39261	2.8974	4.67919	4.19986	12.2576
NM_005996	6926	TBX3	T-box 3	5.05962	3.3269	3.14071	0.046862	0.037968	0.074801	4.03031	4.2719	5.30254	0.718474	0.000769	1.08258	2.93524	2.80416	3.07556	2.60418	2.50133	4.12783	3.04294	3.46168	2.82773	4.45425	2.30275	2.59631	1.20918	1.22809	1.36104	1.34152	1.16349	0.006771	0.733977	0.12062	0.476196	0.664566	2.2977	3.2e-05	0.53483	0.331707	0.361725	0.733838	1.72921	2.2282	1.36661	2.93921	1.7086	4.48807
NM_001029840	285343	TCAIM	T cell activation inhibitor, mitochondrial	0.002	1.63024	2.46634	1.09361	0.587827	2.6884	0.492888	2.30579	1.68914	1.01487	1.12904	3.13733	3.59852	2.58033	3.38394	2.5746	2.20786	2.63886	3.14593	3.15048	3.17433	2.74938	2.53399	1.88268	0.204777	2.09304	2.34713	2.21479	2.38924	2.30598	1.23787	1.76373	1.80349	6.29706	3.94097	4.02703	3.70582	2.71746	2.92665	2.1904	2.96108	4.16849	3.67073	2.47568	0.903977	0.790996
NM_003206	6943	TCF21	transcription factor 21	2.2439	1.82777	3.68234	0	0.119103	0	10.3857	6.70806	10.5377	1.44888	0.697047	0.821299	4.23854	3.56893	5.72719	1.7449	2.61398	2.6463	2.89441	3.27408	5.69319	5.17558	2.64235	3.40538	0.81587	0.170595	0.853631	1.95805	1.45926	0.612279	1.05396	0.59621	0.278538	2.4079	3.01081	1.89235	0.26157	0.059219	0.371213	2.0018	2.28333	2.86611	2.25453	3.78204	3.57866	4.6447
NM_053285	83659	TEKT1	tektin 1	4.13839	2.41611	11.3062	0.173142	0.210786	0.510209	0.937513	1.53837	1.52141	1.06305	0.991263	0.795132	18.4175	12.1155	12.6555	8.06629	5.77975	19.387	6.80162	6.93192	6.45167	14.2048	14.3373	6.12521	20.923	19.6683	21.4187	8.58774	6.66914	7.78105	3.25746	2.65449	5.19866	1.47167	1.0864	1.16647	0.894738	0.891329	0.876451	5.51097	4.47427	2.66414	13.0377	15.5868	14.1707	6.83302
NM_198316	23371	TENC1	tensin like C1 domain containing phosphatase (tensin 2)	2.45838	1.9803	1.61425	1.20261	1.6421	1.22972	0.004375	1.34494	2.20432	1.64545	1.32815	1.92156	2.81705	3.30711	2.45358	3.27697	2.32504	2.39959	3.25652	1.80564	0.944559	1.28511	0.116183	2.01345	1.62797	1.4685	0.724866	2.06454	1.30961	0.357736	0.65637	0.178803	1.2474	1.91815	1.03964	1.27266	0.002016	0.53298	0.819888	1.89438	1.9429	1.98552	2.53946	2.1446	0.394924	2.8049
NM_003225	7031	TFF1	trefoil factor 1	1.8268	0.857389	0.971049	0	0	0	2.29717	2.58141	1.05297	0.696754	0.743967	0.52733	1.44761	1.07214	2.92351	0	0.421439	0	1.36053	1.13214	0.765924	2.80142	2.93519	3.13069	0	0.320601	0	1.81004	0.195479	0.18702	0.233971	0.644413	1.7388	4.65592	3.31459	1.92895	0	0.5895	0.410331	2.30397	1.14224	3.52008	1.52681	0.32017	1.38853	0.785116
NM_001042454	7041	TGFB1I1	transforming growth factor beta 1 induced transcript 1	4.70677	5.83868	3.65076	0.000333	0.856471	0.000369	0.000511	2.20721	3.08982	4.01606	3.55254	3.13676	5.22169	6.22915	6.34373	4.55123	5.55937	2.50738	4.81708	5.47302	5.56644	5.10867	4.74117	4.03386	2.2091	1.35156	1.64852	4.07997	3.92685	2.00898	1.82515	0.000527	1.9883	3.63348	3.1542	3.12765	1.2891	1.75928	2.2965	3.80595	5.01702	4.37437	3.69314	5.35581	5.87004	5.60647
NM_021809	60436	TGIF2	TGFB-induced factor homeobox 2	7.85933	2.97002	5.73073	1.4963	0.400998	0	4.92366	8.33542	1.24038	2.24633	2.14999	1.1241	2.68351	3.76885	3.85631	1.44076	3.68297	2.9091	1.47279	3.34563	3.23951	4.26176	1.92504	1.26581	0.535066	1.62638	2.36168	1.55355	3.41382	2.11732	3.48346	5.26272	2.64605	1.67905	4.88271	3.19376	2.10545	3.66968	0	1.83769	1.44922	3.52544	2.22803	2.49475	0.76996	8.20407
NM_001199535	100527943	TGIF2-C20orf24	TGIF2-C20orf24 readthrough	4.54451	5.43085	5.80924	4.19883	3.66532	1.34083	6.49574	6.0996	6.42309	2.59854	4.60618	4.09384	4.19302	3.82797	3.85089	11.6537	11.5162	3.85751	2.34906	7.32955	11.5347	7.57015	6.02786	6.94614	0.768538	4.40517	7.52417	5.78481	8.24761	3.35586	2.24812	3.5879	1.13092	9.81102	7.9345	3.76787	7.19065	5.47875	7.86763	4.20599	9.54828	8.47701	9.46731	3.78149	7.17579	6.29271
NR_034076	100499177	THAP9-AS1	THAP9 antisense RNA 1	10.5836	9.71079	10.2811	8.59939	6.81072	6.79134	2.25478	3.76053	4.03979	1.90358	0.000105	0.001336	10.084	9.61796	8.19197	1.81955	2.02263	3.05167	7.15536	6.13849	5.07681	6.13635	4.39963	7.26482	3.13417	2.94544	4.17633	2.6231	2.03635	2.04694	6.0974	6.68552	9.52091	8.54143	4.52553	5.22072	9.04575	8.87697	7.38018	6.16279	8.09825	6.39439	6.978	6.66198	9.05979	4.79465
NM_001146019	93643	TJAP1	tight junction associated protein 1 (peripheral)	2.1226	1.8028	2.75327	0.234508	0.001025	0.041133	2.76275	3.44573	2.53092	1.67628	2.2e-05	9.1e-05	3.03709	2.95669	2.85719	3.8208	2.58806	1.61205	4.22825	1.64011	1.98709	1.42103	1.42391	2.06468	3.81987	2.39192	2.28235	2.177	2.65205	0.691073	1.2657	0.178265	7e-05	1.098	0.16823	0.232436	0.053275	0.000507	0.020857	0.420854	1.35255	0.622641	1.44629	2.70677	0.528049	3.31197
NM_001301026	7082	TJP1	tight junction protein ZO-1 isoform d	5.21961	4.83276	9.70698	1.72169	2.7144	1.8539	6.54737	6.42639	5.94323	3.09717	2.57952	4.66444	1.33585	2.54777	5.14664	0.001302	0.143417	4.27411	2.64751	3.67057	4.15453	5.86808	3.18436	5.32499	2.6476	1.90826	1.85858	2.45214	1.61508	1.46351	4.9873	3.98173	3.92173	1.60441	3.28344	3.51903	3.11051	1.8203	2.73206	2.42207	5.27964	3.4595	10.8387	3.20324	7.88849	8.15246
NM_003260	7089	TLE2	transducin-like enhancer of split 2 (E(sp1) homolog, Drosophila)	0.762263	1.02661	1.35316	1.10452	0.670561	2.29836	5.0597	2.67661	3.0475	1.92016	0.001675	1.70584	1.75139	1.8061	2.14214	3.84864	0.006039	2.25638	4.82179	4.66984	3.08782	0.001335	3.76028	1.093	1.97509	2.11682	0.977708	1.97311	2.06576	1.85379	3.67105	0.10838	3.04076	2.48689	5.18286	3.14316	3.08759	2.63771	1.44314	1.61641	0.737962	1.5028	0.00083	2.08867	1.23322	2.57037
NM_001127198	11322	TMC6	transmembrane channel-like 6	3.61906	1.09782	1.82396	1.48993	1.07638	1.39975	2.00193	2.55465	3.55712	1.00227	0.623673	0.000148	4.45885	1.94135	3.3161	1.90259	1.40103	2.33551	2.90924	2.04656	1.39076	3.18667	0.928997	1.35644	0.673714	0.529655	1.31374	0.680008	0.000168	0.613392	1.60453	0.802053	0.00018	1.42933	1.43107	0.9776	0.480825	0.598523	0.754838	1.17636	1.46971	1.70363	1.39316	0.000135	0.669787	3.11104
NM_001193304	55654	TMEM127	transmembrane protein 127	5.53042	3.13835	2.25751	3.886	5.03621	5.25249	5.80193	5.17959	5.44926	4.08457	2.94188	3.1985	2.32548	2.02042	3.81062	4.29888	4.03722	5.22563	1.92388	2.19031	2.13889	6.22039	3.20577	3.68834	2.44672	4.73355	0.013761	3.83076	2.80634	3.0107	3.80037	3.42723	3.46369	2.13882	4.83912	4.66291	3.63761	2.94324	2.66835	4.83458	4.93001	3.31218	5.04632	2.09781	5.00288	4.60027
NR_105020	100505894	TMEM161B-AS1	TMEM161B antisense RNA 1	6.43566	3.53905	3.43521	37.3244	35.3894	28.6725	0.367338	0.560259	0	9.64358	18.9123	18.7474	2.64452	1.00661	3.51465	2.48211	2.64611	2.88949	9.731	13.1121	10.4414	6.43435	12.428	20.7805	18.3902	19.3629	15.8646	5.81444	3.40882	2.47401	22.6043	33.3309	24.7838	22.1568	30.6614	32.7703	45.1547	31.9272	44.3401	15.8612	13.9938	10.6515	15.3212	5.79313	10.8273	0.283012
NM_001142311	92691	TMEM169	transmembrane protein 169	2.17277	3.75583	2.18195	5.69917	4.38857	5.06072	6.21331	4.26244	5.78104	3.62556	2.17195	2.13115	3.38794	2.62647	2.422	1.38725	0.04173	1.57901	3.21702	1.69686	1.99513	2.13537	2.50183	3.92032	1.67593	2.66621	1.44553	1.04638	2.60693	1.77807	3.5055	6.34629	4.80736	0.001042	0.000499	2.59971	2.87075	1.83875	1.13111	2.79083	3.4323	1.90551	1.1569	2.69198	1.71089	0.072746
NM_001105199	80775	TMEM177	transmembrane protein 177	2.73822	4.24196	4.0575	2.87902	2.33369	3.9251	1.42391	0.367518	1.21267	2.70552	1.4518	1.48551	1.53912	2.45346	3.45648	2.06175	2.17395	1.69693	3.35375	4.27799	3.21603	2.35982	3.68479	1.23775	1.94624	0.022269	1.29978	2.38365	3.44774	1.05677	1.0426	0.170396	0.010315	0.000354	2.55724	1.85905	3.02648	0.470135	2.02408	4.28014	2.59232	2.30946	3.25694	3.63685	5.39573	3.00501
NM_016499	51259	TMEM216	transmembrane protein 216	4.90457	7.12044	7.88123	2.27468	2.57842	0.000486	7.06332	7.05943	6.48797	6.4825	7.69446	5.70591	5.65981	4.93121	7.82491	5.88617	6.72983	2.1304	5.0666	7.63682	8.58285	7.21222	7.13569	4.6716	6.17833	5.69751	5.58525	9.18789	9.65365	6.06509	5.09847	3.12785	3.36089	9.59738	8.55659	7.74533	2.41657	2.8524	7.00896	7.21335	6.05206	6.92575	5.52015	6.44116	6.72683	7.53135
NM_001042463	283232	TMEM80	transmembrane protein 80	2.48917	5.13756	3.56837	2.95995	3.1488	3.097	2.18125	0.139073	2.13756	5.10644	5.67351	3.66233	3.6623	4.54304	4.75348	6.129	6.39635	0.001659	4.94199	5.63477	3.49562	4.55289	3.01354	2.10914	4.14246	3.91988	4.174	3.85251	5.30328	3.05821	2.21743	1.04368	0.972668	2.16818	1.73868	1.86483	2.0327	1.88032	3.22535	4.93881	5.27284	5.00969	4.90091	4.97197	4.737	2.85439
NM_001098825	641649	TMEM91	transmembrane protein 91	4.29778	4.10301	0.001183	2.10704	2.57985	2.56568	2.68647	1.83915	2.79112	2.47483	2.994	2.80969	2.86326	3.26957	3.04976	4.20864	3.7151	1.10279	2.36418	3.22829	5.02843	4.33722	1.1682	1.66986	2.48069	0.926095	1.29042	3.89376	2.07515	2.02839	1.09535	3.21904	2.04263	3.15516	0.785609	2.3993	0.103356	1.37288	3.09357	2.12668	1.74764	2.36232	1.60322	3.19129	1.60155	1.07259
NM_001286095	56674	TMEM9B	TMEM9 domain family, member B	6.83545	8.90472	4.68645	9.50243	10.9663	4.52204	4.65254	6.05829	5.31206	6.49213	4.61285	8.52828	6.80408	2.19716	3.59913	0.307292	0.000138	7.221	3.49798	3.31056	0.797897	5.49916	5.28868	5.47729	6.9102	4.56723	6.36903	4.15744	2.50345	0.416174	2.41316	4.65137	0.699103	8.78704	6.84639	6.42096	6.87009	1.8557	3.98523	5.70056	5.97746	5.79372	5.38571	5.62128	6.4572	7.37418
NM_006058	10318	TNIP1	TNFAIP3 interacting protein 1	2.02492	7.07354	7.13776	3.32089	1.66778	4.66154	1.89758	0.003955	2.41336	2.98035	4.78618	2.94643	5.34962	11.1005	11.8411	3.625	1.358	2.56665	4.42371	5.48421	3.91053	6.64507	7.77431	3.25049	0.810338	2.23658	2.12355	2.2893	1.11914	4.26777	10.7381	8.67095	7.46935	0.371855	0.005162	0.973801	4.32422	6.79695	3.92035	6.44595	3.36306	3.71944	5.2683	7.12733	6.24087	0.486167
NM_003280	7134	TNNC1	troponin C type 1 (slow)	10.3356	6.91587	20.6036	2.03372	0.987654	1.46817	6.58556	7.6335	9.19885	16.6281	11.6702	2.61883	21.419	8.1395	8.47042	13.5854	13.4787	11.315	25.751	9.67938	9.92928	6.06059	10.4328	3.76251	6.00287	6.73362	3.67114	9.53355	12.9261	6.04416	9.08962	9.5419	2.02259	4.12431	9.08815	2.61806	2.76883	1.83235	2.04139	4.06813	10.2411	6.65782	4.95684	6.17797	9.13801	8.27986
NM_003279	7125	TNNC2	troponin C type 2 (fast)	6.8448	0.328358	20.839	1.00454	0.677467	0.660821	0.265715	0.690503	0.668164	19.3278	7.84455	1.01023	17.5753	0.113193	0.762718	2.01458	3.09609	7.30693	22.6568	3.79915	3.4056	0	4.29242	0.133455	1.28642	3.26041	0.651052	0.129011	2.50827	0.478246	4.75088	9.00027	0.416136	0.565713	3.51882	0.61226	2.9474	1.75913	1.96854	0.113107	3.75449	2.13334	0.216965	1.0249	2.03219	0.876815
NM_001145841	7136	TNNI2	troponin I type 2 (skeletal, fast)	2.13264	0.316529	5.55505	1.53387	0.244823	0	0.38418	0.332771	0.644175	5.46586	2.29358	0.216277	4.39046	0.436379	0.735299	0.971544	0.129579	1.07498	3.61135	0.990148	0	0.859039	2.20027	0.128476	0.496211	0.589472	0	0.622246	1.21012	0.114996	2.29079	2.23574	0.133426	0.681905	0.484674	0.117857	1.61072	1.09094	0.506253	0.108817	5.1e-05	0	0.73251	0.296438	0.980285	0.362281
NM_001126132	7138	TNNT1	troponin T type 1 (skeletal, slow)	13.2888	5.75859	11.3207	2.78282	3.52819	2.53897	11.118	13.3601	8.40178	7.27849	2.77818	1.6939	25.4174	13.7841	10.0129	7.10628	11.3866	11.9702	28.0752	14.6271	14.7112	14.9871	12.491	10.0808	9.30777	3.52004	6.1149	4.56743	1.46612	1.70062	10.5057	6.24101	0.646059	10.8882	15.4107	6.59122	3.58307	0.685218	0.966546	6.71863	11.5481	15.5948	21.1549	27.7333	32.0599	33.4921
NM_013433	30000	TNPO2	transportin 2	1.43117	10.3016	7.94582	17.8963	25.7773	23.5891	7.23595	5.97916	7.49513	15.8133	22.7487	12.3839	7.46992	9.28327	9.15735	15.8391	17.1872	9.24532	4.99699	8.70633	8.8683	10.2556	14.1568	10.1052	5.26693	9.72169	5.50112	5.19416	9.72991	13.2011	12.1396	10.1437	11.5802	12.1063	9.122	9.57647	9.8635	13.4504	11.4927	15.6197	13.7216	12.7624	7.3638	5.6294	8.09948	4.64044
NM_006114	10452	TOMM40	translocase of outer mitochondrial membrane 40 homolog (yeast)	8.12803	39.3451	21.2791	24.5633	23.6942	1.28515	18.4044	4.37644	17.6659	0.149217	25.1535	2.0175	4.84251	22.9516	0.897577	15.7198	33.9573	19.4086	29.2399	9.5662	24.6556	9.39177	27.0529	17.554	22.3021	21.1197	22.5713	28.2418	0.073321	9.09147	30.7571	0.006673	0.118504	35.017	34.7145	14.1756	21.8907	0.180049	8.23858	34.0507	32.045	27.7932	25.307	30.8992	31.4084	0.121929
NR_033992	100129250	TOPORS-AS1	TOPORS antisense RNA 1	3.68648	8.11677	6.51907	6.20385	5.0209	4.13252	4.77024	6.39441	4.22502	5.92878	6.87379	5.33579	7.26936	9.30618	7.78647	17.3279	12.9955	3.91775	9.81663	7.91699	7.76498	10.6449	12.7203	5.66816	8.21293	6.04935	7.5311	9.48166	11.7042	8.03249	7.62044	4.53252	5.47768	5.82926	5.32086	5.44868	3.68067	5.82985	6.43813	7.0302	9.15267	5.63394	6.5686	7.7246	8.92833	5.46883
NM_017901	53373	TPCN1	two pore segment channel 1	3.18731	1.19311	2.3117	0.709121	1.62487	0.80655	3.10692	3.15322	4.78356	1.51262	0.262069	1.5312	2.08325	2.96328	3.96868	4.05167	3.24888	2.44876	5.15345	3.94453	3.89537	3.09155	3.63752	0.42366	1.90458	2.21236	0.465816	2.28306	3.02246	1.54007	1.71563	0.001638	0.950696	1.91442	1.14972	1.75395	1.41759	1.86308	0.042216	2.6496	2.06025	3.91178	1.12234	1.40269	3.52722	3.8282
NM_001013642	388610	TRNP1	TMF1-regulated nuclear protein 1	13.2271	3.65714	4.37452	6.5655	6.49267	7.20166	11.2744	8.56383	14.0333	4.62984	5.59232	6.09595	8.544	8.99802	8.66356	7.00761	8.96565	5.04092	8.10063	7.44019	7.26706	7.80036	7.73422	7.37654	4.96307	3.84488	4.26809	5.45533	4.19915	4.61461	6.66606	4.30811	4.89682	14.5573	10.3298	8.12756	2.87425	2.7195	3.2254	6.83117	8.76424	7.89124	6.02886	7.65569	6.51204	20.611
NM_206948	80036	TRPM3	transient receptor potential cation channel, subfamily M, member 3	27.3266	14.3976	71.9064	7.3527	4.25145	6.50403	27.5492	50.088	32.3163	4.65404	3.06678	3.52373	97.2758	84.1243	79.5329	58.6143	46.8315	129.28	46.7402	48.6891	46.0103	58.5418	50.2516	28.8564	83.1018	81.4864	93.0179	63.3284	67.7942	59.7814	28.4898	36.6827	48.5903	9.03753	5.13293	5.63182	10.6554	11.926	8.5869	13.3883	17.5024	10.9188	72.3612	78.4791	71.0256	25.1272
NM_001025235	7106	TSPAN4	tetraspanin 4	4.6102	1.47013	7.2375	1.88244	0.000288	0.000161	9.74279	1.52824	15.5363	3.01738	2.1642	3.68235	9.39949	9.22912	10.6498	21.6103	9.92593	9.03836	8.77052	3.74393	5.94211	6.09551	4.40035	9.50229	7.08232	5.93675	8.3104	6.24733	8.8264	8.31675	3.94781	3.35688	4.13301	1.79268	7.98714	4.9763	2.66998	4.48668	4.33193	3.50347	6.10603	6.95945	7.51782	10.7252	8.78176	10.3708
NM_006675	10867	TSPAN9	tetraspanin 9	5.92661	3.10264	9.71177	2.5297	3.58833	2.22919	7.4869	8.82189	8.08767	4.66993	3.63956	4.2111	6.53983	10.4457	11.0493	9.16737	9.38332	5.99677	6.75496	6.35186	5.21446	5.36777	6.19465	2.95853	8.38591	5.81491	7.31415	2.70288	3.33608	7.06459	0.000346	5.25704	2.61154	3.91352	4.89283	3.69804	2.10161	1.45701	1.05685	7.37974	5.15231	3.94301	9.32375	8.64983	11.434	11.0163
NM_005706	10078	TSSC4	tumor suppressing subtransferable candidate 4	2.56856	8.80134	4.85543	11.4572	7.74484	10.9664	6.92317	6.27744	6.31818	5.89536	9.04101	6.07945	10.2179	13.0024	13.7768	13.1733	14.5826	4.2275	13.6711	11.8175	13.8552	12.9218	13.7918	7.69786	10.9036	8.69653	8.35567	11.1382	13.1572	12.4607	15.1549	11.317	10.044	13.1571	11.12	11.206	10.1218	8.47891	11.5604	10.926	13.2664	11.2646	5.75489	10.6264	10.3966	10.0902
NM_000371	7276	TTR	transthyretin	997.369	441.978	2432.36	83.9222	17.1553	104.955	816.244	1040.56	1120.3	69.8807	69.5329	60.8369	4293.08	4054.59	4225.92	14531.6	11439	6795.46	4274.81	4633.75	4390.89	5220.34	5514.33	1633.63	14440.8	13222.6	14888.7	9198.54	11133.4	7276.97	1094.15	717.702	1737.1	747.049	286.518	255.301	721.107	849.878	744.783	2195.26	2435.95	974.968	8469.77	9097.02	6970.41	2033.48
NM_001289129	10382	TUBB4A	tubulin, beta 4A class IVa	1.93774	4.617	3.13332	9.50441	10.6228	0.138376	4.68928	3.771	2.29568	5.13717	7.60034	6.11798	3.46826	3.38607	3.32332	9.49717	7.91005	2.56352	6.18786	5.5517	6.37233	3.06323	8.93143	5.06375	3.29072	5.65833	4.70646	7.57183	8.45724	12.2086	0.004395	2.18218	4.22718	7.8587	6.98784	7.27991	6.75995	9.13551	6.24608	9.75476	8.20745	8.39781	3.60048	2.68999	0.733143	0.583321
NM_014444	27229	TUBGCP4	tubulin, gamma complex associated protein 4	3.06183	3.67342	3.05189	4.51627	5.48002	5.48686	3.02227	4.28677	3.06413	4.20913	3.51911	0.005338	3.78581	3.23165	2.4437	2.28958	1.87255	3.95824	3.61474	3.33956	3.2474	4.44268	4.40412	4.89564	2.80283	1.44881	3.03926	2.015	2.0706	2.99806	2.56056	5.52076	6.83188	2.75333	3.48	1.88791	4.57282	4.05592	2.77345	3.65652	3.26981	3.7594	4.231	1.69134	2.49787	3.1513
NM_003332	7305	TYROBP	TYRO protein tyrosine kinase binding protein	11.7457	3.43561	3.68466	0	0	0	0	0	0	2.68415	2.00939	3.25395	4.36316	3.32953	4.50713	0	0	0	5.17264	1.79502	1.85543	8.34072	4.48497	4.48653	0	0	0	1.73476	1.20979	7.3e-05	0	0	0	3.10954	1.2851	1.7696	0	0	0	1.72241	2.44991	3.57206	5.32751	1.95012	3.80137	7.12927
NM_182678	10477	UBE2E3	ubiquitin-conjugating enzyme E2E 3	25.1244	33.0643	28.6945	23.2765	25.6383	21.6738	30.0278	28.2867	19.2753	21.2968	24.6887	19.8924	25.1669	25.2169	29.5146	30.144	19.216	20.1966	25.1598	23.2813	24.0574	17.3078	33.2781	34.8869	21.6537	25.6869	30.8313	36.5138	22.9293	22.9155	22.0618	29.4659	25.5294	3.03837	17.107	10.0432	22.9669	18.7511	28.1962	17.878	25.7482	17.995	25.0891	17.3417	19.2458	15.8345
NM_018299	55284	UBE2W	ubiquitin-conjugating enzyme E2W (putative)	3.58044	2.01026	4.21014	3.1624	2.7602	1.91628	2.51637	3.44234	2.80792	2.20249	2.8192	4.02414	3.01859	2.58995	2.79723	1.68868	1.47266	3.76376	3.36984	3.13361	3.01993	3.01273	2.83496	4.48154	3.41911	2.50259	3.50283	2.49514	0.109536	1.63786	3.28257	3.43013	3.44308	3.13042	1.9142	2.92265	3.72321	1.57393	2.08907	2.99515	3.29022	2.23735	4.00191	2.78991	2.62715	2.67316
NM_183008	91544	UBXN11	UBX domain protein 11	2.04556	2.8214	0.776906	1.38715	0.494929	0.917891	3.09735	1.19574	0.544174	1.55518	2.15769	1.93992	1.73756	4.36865	3.55327	6.54211	2.69793	5.41782	3.1684	3.90372	2.45655	2.27775	4.69601	3.07688	7.07015	4.29597	4.65152	5.77308	8.67683	3.97634	2.89915	0.820467	0.001615	1.57772	1.42178	0.689812	0.034725	0.000222	0.000284	2.81389	2.48719	1.37054	3.23542	6.29384	5.27432	2.90709
NM_001048201	29128	UHRF1	ubiquitin-like with PHD and ring finger domains 1	2.66666	3.20191	3.87642	1.49694	0.36964	2.43933	3.66531	3.36694	2.90394	1.43582	1.85751	0.338279	4.08092	4.50162	4.96218	1.8884	1.37673	0.372445	3.83139	2.98891	6.23732	4.05424	2e-06	1.64361	1.16153	0.850778	1.39529	3.41443	2.00555	1.7642	6.78631	1.75147	2.05354	3.58359	6.55141	1.29323	3.63285	3.99418	3.04034	4.7404	1.25711	3.60745	2.82957	4.54326	1.58563	4.01054
NM_001099436	25989	ULK3	unc-51 like kinase 3	0.572	4.19268	1.43224	0.465823	0.001074	2.44437	1e-06	0	0	3.71552	4.57474	3.06494	4.24638	4.64888	6.43209	3.48302	6.13992	3.54529	2.84883	1.0596	2.7223	4.12367	5.09089	2.62398	0.081394	0.270906	2e-06	4.76262	5.93637	3.86097	6.11023	3.68605	1.66773	0	0	2e-06	2.22215	0.151902	1.73814	1.65359	0.130792	0.228787	3.01069	1.79954	0.002129	0
NM_001302348	729852	UMAD1	UBAP1-MVB12-associated (UMA) domain containing 1	1.14921	1.621	0.769389	2.61155	0.007588	1.59964	3.08474	5.03794	0.025785	1.60992	2.75847	3.59457	3.42217	3.31955	3.19527	0.02968	0.032352	3.46799	2.79464	3.84831	2.68451	2.80593	2.6619	0.002234	0.030529	2.31962	2.66291	0.030822	0.030508	0.000672	3.69571	3.48988	3.04847	0.033825	1.56566	0.000877	3.10845	1.83598	1.57086	0.027073	2.77375	0.02655	3.19277	2.74277	3.71862	5.23338
NM_006634	10791	VAMP5	vesicle-associated membrane protein 5	3.15147	1.35492	2.15108	0.691106	0.611641	0.389579	3.42698	3.20626	2.52815	2.17729	3.6781	1.38949	1.57293	0.817731	2.47386	3.76703	3.05489	0.511119	0.990643	0.847644	1.38056	1.18175	1.79864	1.23892	1.45966	0.84105	0.805838	1.46354	2.32809	2.58988	1.37885	1.68862	1.14476	0.583604	1.34843	1.64266	0.506919	0.129609	0.406098	1.51685	2.62419	2.77995	1.67847	2.43132	2.62002	0.904523
NM_003761	8673	VAMP8	vesicle-associated membrane protein 8	11.9185	2.96364	4.44661	0.070705	0.715802	0.079841	15.1628	12.5458	15.2407	2.44312	1.91145	2.18478	8.4002	11.183	9.47714	8.73353	5.69643	4.29304	9.24776	6.94034	5.5501	12.0483	7.15519	7.45646	2.61332	1.8945	1.10247	4.59108	3.50683	2.42906	3.13557	2.0739	3.05151	9.33266	7.48198	2.89688	0.663979	0.638238	0.222218	3.54098	7.06478	6.8395	5.41851	5.81519	8.49757	21.6206
NM_001078	7412	VCAM1	vascular cell adhesion molecule 1	7.60765	16.6435	11.5022	3.23771	3.11084	2.92227	0.9339	0.941553	0.610977	6.44034	4.54898	8.74457	10.3195	7.55744	10.1117	0.623185	0.963298	1.43899	3.53244	2.77956	3.2497	6.27841	4.34552	6.49849	1.52464	1.425	1.74891	3.57186	3.33967	8.06403	7.86151	9.99909	7.69515	1.47765	1.39332	5.1e-05	4.30108	4.15876	6.75501	2.05628	2.77176	2.47746	2.66953	2.01933	1.67657	1.16035
NM_182894	338917	VSX2	visual system homeobox 2	0.192143	0.020162	3.57781	0	0	0	33.0043	28.3158	30.4309	0.061301	0.109654	0	0	0	0.258162	0.023154	0	0	0.017555	0.150134	0.066742	1.16599	0	1.03508	0	0	0	1.10109	0.093097	0	0.732165	1.04677	1.7626	4.65905	11.6511	6.7589	0.017943	0.023206	0.024248	0.395784	0.044408	0.041334	0	0.018962	0	0.069202
NM_024626	79679	VTCN1	V-set domain containing T cell activation inhibitor 1	3.49832	0	2.46616	0.198408	0.638829	0.098298	1.53359	3.14257	3.14227	1.37999	0.354831	1.51721	7.80604	11.4912	7.40071	0.562492	0.854154	1.90713	2.43411	1.65164	1.63549	10.1005	4.67147	7.06703	1.30336	0.151995	0.469976	0.97126	0	0.361177	1.05039	0.769717	1.03632	3.72994	4.6175	2.8824	0.729812	0.18558	0	3.02628	6.49357	6.92699	2.32667	5.7927	3.8439	17.8762
NR_026703	56664	VTRNA1-1	vault RNA 1-1	0	0	0	0	0	0	0	0	543.774	109.465	0	0	0	0	0	0	139.488	0	0	108.2	0	0	0	0	0	0	0	0	0	0	0	0	129.391	0	0	0	0	0	0	130.368	0	0	0	82.2103	0	135.219
NR_026705	56662	VTRNA1-3	vault RNA 1-3	0	0	0	0	0	0	0	203.759	0	0	203.459	0	0	0	0	0	0	226.616	0	0	0	0	0	0	0	0	0	0	0	0	0	0	0	0	0	0	0	0	164.97	0	0	0	0	0	0	0
NR_030583	100126299	VTRNA2-1	vault RNA 2-1	0	0	210.446	0	134.686	0	0	229.174	167.733	0	0	0	0	0	0	0	0	0	0	0	0	312.446	0	0	0	0	0	101.868	97.7115	115.704	0	0	0	0	0	0	0	0	0	120.437	0	0	117.838	0	92.6437	0
NR_045104	81556	VWA9	von Willebrand factor A domain containing 9	5.35827	4.36255	4.45927	3.15077	2.68387	2.0602	4.55989	3.50897	4.31799	1.28495	1.11351	4.16506	5.40708	3.13821	2.42508	0.135816	2.09657	3.18698	3.42569	2.20566	3.6748	5.55927	4.19628	4.03864	3.07183	2.59921	5.45539	3.67185	2.16408	1.58565	2.65464	4.12066	3.84856	3.67948	2.13969	2.33722	2.38349	2.53419	1.99704	2.27845	4.39617	1.31878	5.11712	4.44536	3.30636	5.07859
NR_033266	375690	WASH5P	WAS protein family homolog 5 pseudogene	5.81627	6.62381	7.4805	7.95038	12.2682	10.2391	7.41709	7.52953	7.16558	11.8239	2.08583	5.75615	6.98257	5.36093	4.63596	9.92983	9.41077	10.5992	5.66641	7.05953	7.77313	3.77149	4.32036	4.44838	6.37207	10.4549	5.71232	1.52182	2.38747	3.31352	5.31875	4.76629	4.33242	4.01305	3.51039	5.63612	7.17827	7.83382	2.65585	5.21366	2.27889	4.86428	4.52526	4.12399	7.46856	4.48067
NM_001045476	401551	WDR38	WD repeat domain 38	1.13262	0	3.49978	0.186907	0	0.131954	0.536477	0.442914	1.34354	0.642225	0.962528	0	4.74493	7.23627	4.7922	15.1549	13.2922	8.05613	3.18956	4.23458	3.04977	6.36721	1.48546	1.50003	7.58888	6.38258	6.2769	7.57225	9.29489	8.78064	0.690527	1.64575	1.54681	1.6e-05	0.000404	0.524086	0.245726	0	0.127797	0	0.414594	0.912409	4.6742	3.59611	3.78715	2.91569
NM_198285	349136	WDR86	WD repeat domain 86	2.44677	1.98758	3.72747	0.681798	0.647597	1.93453	2.1214	2.76445	2.4826	1.61882	1.30185	1.08183	0.66	1.99988	3.02227	3.44991	1.62832	0.033556	4.44907	4.29337	5.30864	3.39523	1.44435	2.86604	1.6207	1.08784	1.01362	2.19161	1.67225	3.94856	6.63818	6.0385	4.597	2.36436	1.44082	2.10914	2.13906	2.12505	4.07942	2.49142	2.30994	2.79354	0.689331	1.84932	2.55636	1.34796
NM_001128212	151525	WDSUB1	WD repeat, sterile alpha motif and U-box domain containing 1	2.64575	2.48457	2.02794	3.64234	3.51369	3.45796	4.07118	3.92438	5.12535	1.77598	1.81063	2.45209	3.80696	3.20308	3.3557	0.003369	1.88335	3.38232	1.96078	2.6655	2.63287	3.39634	2.80389	3.24479	0.003479	2.55392	3.45435	0.003473	2.16786	0.003185	1.21495	1.76975	2.8475	0.003856	3.39548	2.42118	2.48808	2.22506	1.92369	2.03271	3.00177	3.45556	1.96171	2.3644	2.73589	5.08611
NM_175575	124857	WFIKKN2	WAP, follistatin/kazal, immunoglobulin, kunitz and netrin domain containing 2	3.25755	1.54285	10.8087	1.19236	0.305874	0.807233	1.67138	1.83084	2.30991	0.499689	0.484473	0.3591	22.4955	20.5393	21.9064	92.8409	70.7853	39.8832	4.26403	3.52231	4.35122	10.7412	11.2095	2.97504	44.1273	44.5636	43.1988	22.2905	38.7741	25.9502	2.26673	1.63133	3.92969	1.21144	0.990393	1.34136	2.36304	4.77875	2.60192	2.61289	1.89141	1.25538	12.3311	14.708	14.9667	4.76776
NM_006005	7466	WFS1	Wolfram syndrome 1 (wolframin)	2.55017	2.54504	4.04843	2.07096	1.81049	2.94246	1.54082	2.34536	3.85853	4.05944	0.004437	0.004052	3.57004	4.77872	4.55807	9.40423	9.34595	4.98863	4.25058	3.26345	2.56001	5.58799	4.33054	3.32501	7.50464	5.23647	1.99301	5.76328	4.37012	4.79262	4.00709	1.03838	3.0708	2.35648	2.67964	2.886	3.56554	3.05581	2.87193	4.50374	0.002905	4.55774	3.63449	5.64556	6.62124	2.47282
NM_001077269	7456	WIPF1	WAS/WASL interacting protein family, member 1	3.69024	1.71685	3.05157	0.597415	0.000471	0.514711	7.17737	8.05539	9.73058	1.76125	1.86507	3.12261	4.73616	5.05435	4.4858	2.21817	1.84579	3.39836	4.53797	4.00357	2.02177	5.39769	4.10241	1.125	2.05225	0.000567	1.02455	1.57319	0.986536	1.67703	1.15206	0.000754	2.288	1.18982	3.44727	1.90701	1.46105	1.26057	0.934117	2.53273	2.6959	3.50494	3.48824	3.59246	3.73124	13.7355
NM_030775	81029	WNT5B	wingless-type MMTV integration site family, member 5B	27.6212	7.6235	9.44721	2.99649	2.69457	1.44178	12.0453	10.9755	10.5763	7.80242	8.93493	9.26512	33.9453	37.8473	33.0134	10.7015	16.9979	8.90971	34.3978	29.366	22.0826	41.9862	26.2421	21.9632	18.3186	7.0603	12.229	15.6433	9.41242	6.7985	11.6046	4.08122	7.14863	18.6737	15.2192	13.266	5.3557	4.12532	4.64982	13.8148	22.3347	17.6208	29.6952	30.8511	32.5976	53.1835
NM_004625	7476	WNT7A	wingless-type MMTV integration site family, member 7A	3.15896	8.93402	1.30058	7.92399	8.52354	9.61988	0.266733	0.115336	0.074302	7.49139	9.23513	8.18611	3.26969	4.07003	6.02317	2.74533	2.67039	1.0364	3.17349	3.87267	3.89971	2.21341	5.42195	3.81817	4.58716	5.68725	4.03486	6.9745	5.04351	8.69092	16.0467	10.1497	8.66466	2.61092	3.63843	4.61839	5.44021	6.89427	6.62871	5.20421	5.34939	4.52305	1.82597	1.45109	1.07057	0.420659
NM_001270531	9589	WTAP	Wilms tumor 1 associated protein	10.0089	11.0407	8.92743	9.90506	9.48526	7.01806	6.06957	8.574	6.19611	5.9565	4.7673	8.36109	8.14649	9.21179	4.23265	1.10156	0.469743	4.80628	6.02089	4.87252	4.82322	6.16608	8.5439	10.8823	6.58988	5.16303	9.59393	4.53878	2.09927	3.00884	5.9782	9.6587	11.4993	5.96149	7.17239	4.99303	12.981	8.15291	6.73426	4.72872	6.58913	5.38403	6.0197	5.16001	4.25485	4.923
NM_001168280	25937	WWTR1	WW domain containing transcription regulator 1	2.12709	4.99326	2.98925	1.73535	0.883865	0.000185	0.558284	4.49317	0.812689	3.45175	8.6205	4.83111	3.81203	2.68319	1.80676	6.02226	3.73339	11.9208	5.44999	4.20696	5.23106	5.74017	5.70955	5.50186	4.84906	5.48772	2.39724	3.87682	0.006513	0.125789	2.00697	2.20507	3.01049	3.07277	2.77156	0.015317	0.857837	0.719136	0.417062	4.75983	5.62272	5.98051	5.91853	3.51927	2.48488	3.70602
NM_001172828	51441	YTHDF2	YTH domain family, member 2	12.5322	9.89423	13.9739	11.2019	7.61874	11.1055	7.60833	11.8094	12.1687	5.8949	8.95484	11.1005	9.59144	11.8368	8.0578	0.835568	4.86826	12.6264	11.1428	11.8908	9.68991	14.0953	4.44371	15.7434	9.76254	10.6376	8.27962	5.67187	5.03543	4.52587	13.9979	12.548	18.624	17.3061	14.0491	8.28129	12.2542	6.91555	9.68439	8.74952	6.08903	10.4812	7.08062	8.17893	12.977	10.8222
NM_152758	253943	YTHDF3	YTH domain family, member 3	12.4313	11.2956	9.76049	8.99045	8.10213	10.191	9.90389	10.8093	11.9037	5.63913	4.64469	6.25003	10.7041	11.2345	6.37245	2.37538	3.55952	12.018	6.17947	7.58524	6.31412	9.2585	5.63299	5.27765	8.49661	6.17769	10.4384	2.43473	3.47979	5.13298	11.1833	10.9953	9.03534	8.35008	10.6453	8.93306	8.27981	5.61302	4.45708	6.43394	8.76392	8.34275	8.47321	7.47009	8.31326	8.99171
NM_001198902	55249	YY1AP1	YY1 associated protein 1	4.34685	6.82132	2.87805	9.40001	6.77524	4.28555	2.69932	6.7874	5.9905	4.55089	4.1531	1.42249	0.839236	0	4.53307	0.519717	1.35473	4.57731	4.31249	3.32446	2.54899	6.92885	3.89519	5.79993	2.58745	3.75859	0.869942	6.43207	7.33527	4.94877	6.22555	4.54207	7.64764	3.96633	8.03866	6.72723	7.58376	7.37213	1.69782	6.24655	8.38719	4.5226	4.00541	2.88116	1.03355	5.8161
NM_018684	55906	ZC4H2	zinc finger, C4H2 domain containing	2.75766	4.92873	4.01709	5.51696	6.34946	5.5963	1.83878	3.06314	1.84552	3.35386	2.82932	3.72068	4.41371	4.17808	3.56834	6.9e-05	0.909066	3.25603	2.68561	4.95262	2.53654	3.03586	3.17134	4.09624	3.02337	1.66088	3.28658	2.13025	1.47582	2.9838	5.70164	5.96689	4.65072	3.09917	3.80421	3.56142	4.77727	4.28495	3.47971	4.19132	3.31168	5.80675	3.68047	2.47104	2.72248	1.132
NM_017665	54819	ZCCHC10	zinc finger, CCHC domain containing 10	4.55385	3.94572	4.25698	7.38032	4.48441	4.29159	2.472	5.35323	4.09399	2.75837	2.03877	4.04455	5.1603	3.13211	3.79395	0.692018	0.000786	2.46622	3.4227	2.84721	1.89428	2.78298	4.48183	6.03859	2.11696	2.65592	3.67149	1.71369	1.27817	2.35472	4.16951	5.58269	4.95089	4.50952	4.21201	3.43106	4.71747	2.20047	4.09881	1.53555	2.29707	2.3071	2.91998	3.48694	2.62871	4.20777
NM_032226	84186	ZCCHC7	zinc finger, CCHC domain containing 7	6.11342	8.85516	7.37423	6.79879	6.59469	3.54175	2.009	3.93034	4.81822	3.52524	0.001813	7.41291	7.375	4.92503	4.3113	2.31178	0.138236	4.38563	5.20783	6.65232	5.89922	6.59715	6.50015	10.8243	5.29764	5.40015	5.91847	3.25694	2.35557	1.86074	7.09626	6.51437	6.1133	7.79026	5.59641	6.67512	8.766	6.13567	6.1747	5.63785	3.23349	6.83479	4.05981	3.43555	4.1358	7.77332
NM_001134389	55146	ZDHHC4	zinc finger, DHHC-type containing 4	15.814	18.6621	16.4576	10.077	10.0459	8.62286	13.6741	12.8113	14.0099	9.50983	10.3419	11.1042	13.45	13.5843	11.7966	3.79994	5.1334	8.70162	11.6837	10.8593	7.86246	14.1979	10.4879	8.73474	14.3338	9.11437	7.38425	10.8447	1.31204	6.23761	18.4366	14.7565	15.04	16.2808	17.7067	16.6831	5.83526	9.06562	7.6845	12.1693	11.6144	11.9133	17.8324	13.1636	15.2472	15.9021
NM_001170797	79752	ZFAND1	zinc finger, AN1-type domain 1	4.26656	5.66833	6.41302	2.08214	6.59861	2.49305	0.873094	3.20167	4.03478	2.33971	3.95591	4.82301	3.46423	4.0119	5.8497	1.1428	0.781856	0.060727	2.62704	4.29239	1.52927	1.79022	3.19396	1.79534	0.522804	1.10503	4.55828	0.129933	1.37287	3.21731	6.81981	3.59235	6.97366	6.02024	4.83193	3.35496	4.86018	2.44677	5.17218	5.07763	5.13306	5.99984	2.46344	3.65612	6.19218	4.8746
NM_001278243	7763	ZFAND5	zinc finger, AN1-type domain 5	6.48201	10.2753	9.73846	6.68506	9.7821	2.97373	5.70287	4.9877	6.27559	5.14954	7.45599	9.80979	6.24209	4.85541	4.52314	1.37893	3.14882	8.93191	4.01594	4.52783	4.83751	8.63183	11.022	10.6452	6.6789	7.16374	8.74917	4.88653	2.13681	4.75908	1.35333	1.63666	3.52941	9.31585	9.88355	4.89129	4.4286	3.7885	1.21594	8.25961	9.44085	8.98399	11.8662	6.3433	6.34099	8.31025
NM_018197	55734	ZFP64	ZFP64 zinc finger protein	2.33327	2.70204	1.56347	2.27195	4.25614	1.67255	2.72139	1.36833	1.36378	2.64447	3.67528	3.62871	2.55098	0.002785	2.24629	0.49472	1.82916	1.57289	2.26288	3.66689	1.11893	1.27445	1.41835	2.86053	2.44468	2.86952	3.18493	1.75431	1.72117	3.2467	2.98778	0.228113	1.59693	0.338008	2.33105	1.55957	3.17604	2.47266	2.41628	1.59168	0.178007	2.63807	2.50706	2.19924	2.1781	2.35729
NM_001178084	7543	ZFX	zinc finger protein, X-linked	3.33955	2.85886	2.93943	2.49296	3.84996	2.53681	2.54837	3.21936	3.69597	1.58168	1.20041	1.71227	1.93261	0.935507	0.902416	0.501586	0.015014	0.339786	2.44604	1.33973	0.556843	4.50451	1.88945	5.44102	3.05143	2.80749	1.86792	1.91653	0.483143	2.10369	1.84518	3.37959	3.22545	0.031199	2.26833	1.72188	1.09797	1.04299	0.988212	3.82264	3.47288	3.7291	3.77552	3.15535	1.8917	2.30809
NM_014733	9765	ZFYVE16	zinc finger, FYVE domain containing 16	9.75374	1.48153	10.5009	1.46798	2.42227	3.86667	5.43865	7.64615	6.14677	3.30102	2.1329	4.86164	10.1159	7.98748	7.3815	4.66423	4.66782	6.04024	10.751	11.2129	10.2372	9.49586	10.356	9.96642	28.3434	25.602	31.4677	4.0174	3.9053	4.7957	5.72797	3.47935	7.6077	2.34739	0.900529	1.11999	3.08618	2.11989	2.58316	4.84482	5.64713	3.75745	15.6286	17.9317	10.297	9.49009
NM_032850	84936	ZFYVE19	zinc finger, FYVE domain containing 19	1.30641	2.05051	0.522929	2.48454	1.3001	2.02454	1.4885	1.27677	2.48411	1.90851	2.18827	2.59256	0.695516	1.66271	3.15349	2.73388	1.97522	0.063749	1.3843	0.870098	2.20106	3.62588	2.46086	1.49641	2.81059	2.29581	0.737046	2.21241	3.16655	2.04647	4.73502	2.5818	2.5224	0.882781	0.316329	0.813333	0.001922	1.57437	2.16612	0.36026	2.37781	2.26723	1.70696	2.42076	0.605743	0.78547
NM_001282998	7692	ZNF133	zinc finger protein 133	2.85272	3.92833	1.25153	3.65144	3.65524	3.85754	1.33272	2.68055	1.96257	3.23833	3.62458	0.000186	2.52347	2.45329	3.19453	3.06731	3.37565	1.567	2.98661	3.11622	3.12907	4.3873	2.6865	1.91766	1.51971	2.54387	1.54589	3.85327	3.26335	3.17723	2.3665	1.32855	2.63442	1.29262	1.84778	4.28691	4.09949	1.92579	3.14634	2.02546	3.98026	4.41093	2.70195	2.28295	1.70518	2.56872
NM_003442	7702	ZNF143	zinc finger protein 143	4.5227	1.50954	4.67542	2.98182	2.07888	2.44119	4.00292	3.27546	2.86809	2.73195	0.000251	3.43239	3.08559	1.48418	1.99533	0.66181	0.000128	0.515687	1.85181	2.56542	2.31805	2.38612	1.69011	4.24235	2.31811	2.23852	1.47632	0.876261	1.48248	0.836823	4.52027	2.31236	2.45281	1.71408	2.89089	1.83452	2.08858	0.934232	2.3503	1.27262	2.79798	0.973173	1.84635	2.09559	0.827938	1.86249
NM_001145665	339318	ZNF181	zinc finger protein 181	3.3776	1.62296	2.61511	3.90091	2.81656	4.15967	1.36637	2.40123	2.23401	2.26199	1.3151	2.89783	1.64896	2.36733	2.90388	1.2286	0.809607	2.04173	2.18179	2.22962	1.86101	3.15015	1.85947	3.83262	2.47544	2.47822	3.02568	0.553393	1.47437	4.3e-05	1.87418	3.87177	4.00098	2.16595	2.68885	1.17931	2.88688	2.6582	2.27094	3.62815	2.82124	2.84428	1.03907	3.13222	2.5956	1.94631
NM_004220	7760	ZNF213	zinc finger protein 213	0.31556	0.000301	0.005373	2.67106	2.98199	2.42027	0.075009	1.61008	2.03609	2.77553	0.001095	1.77078	2.47655	1.98255	2.98016	4.26318	3.96468	1.75447	3.18323	3.37834	3.53557	1.38437	1.83654	1.70243	1.33173	2.48222	2.12255	2.6809	3.59106	3.16111	2.87049	1.8347	1.42257	2.73527	2.27308	2.68009	2.15733	1.94654	1.66121	2.79612	2.1143	1.76345	1.62351	2.03038	2.05149	1.29781
NM_001102454	51222	ZNF219	zinc finger protein 219	3.7477	0.018825	6.21691	3.36468	0.001946	0.046633	9.83142	6.31506	1.57641	5.71752	1.09123	0.003874	2.6558	1.78718	10.9466	5.23499	9.75028	1.99695	8.15976	6.78463	8.39344	7.70594	4.39483	1.3579	2.15794	0.001234	3.76598	3.04968	7.52095	4.66596	0.289199	2.87395	6.97644	5.26047	0.008872	1.36229	6.17176	1.80593	1.74457	7.32367	4.42569	4.79576	6.35494	1.23769	4.11701	2.57556
NM_182490	7770	ZNF227	zinc finger protein 227	3.0418	0.052718	2.11131	2.68539	1.85641	3.36261	2.07604	1.94826	0.040418	2.78045	1.83847	2.6187	2.52257	2.78204	2.84916	0.849234	1.14339	1.03141	3.39466	2.73382	1.24101	1.94736	2.3e-05	0.426445	1.36746	2.63865	2.18676	1.38092	0.947487	0.442573	2.86638	3.75782	2.69274	1.67165	3.13875	1.28619	2.28451	2.33367	2.40586	3.13018	1.19014	3.00389	1.73483	3.11604	2.70545	2.84123
NM_001278661	9534	ZNF254	zinc finger protein 254	1.7357	3.03909	3.33691	4.54008	2.73886	2.69364	2.73782	4.1974	4.04425	2.1989	2.32551	3.97343	1.56441	3.402	2.84778	2.90999	2.67914	1.18137	2.7825	2.16026	3.77902	2.29825	2.24022	1.87462	2.64544	1.81399	2.71138	2.06881	1.36315	3.36478	2.33227	4.47745	1.52369	5.12721	3.17366	0.22314	4.5271	4.44735	3.66541	2.06499	4.8464	1.07836	1.30705	3.16414	1.87923	2.82199
NM_012482	23528	ZNF281	zinc finger protein 281	0.007832	6.02853	5.57889	2.58359	2.6469	4.59945	2.94681	2.61948	4.85759	4.44476	2.46117	3.95627	2.89876	4.5335	5.89396	3.00969	0.00492	1.26389	4.76268	2.66477	2.57448	2.9587	0.004275	1.77433	2.79376	3.44553	5.94727	1.05004	1.21842	2.81014	4.06879	3.93656	3.74277	4.4528	2.9692	0.0455	2.80107	2.54509	0.013105	5.73123	4.48348	5.6745	3.651	1.57647	1.62619	2.69946
NM_001184751	79797	ZNF408	zinc finger protein 408	0.583358	1.20209	1.87479	2.43489	3.05284	3.10586	1.95273	1.15164	2.56112	3.01606	1.01649	1.58559	2.11144	3.03594	2.8233	2.2818	3.01617	1.32367	3.51477	2.25202	3.2941	4.10436	2.19652	0.350164	2.36031	2.92019	1.29025	1.76922	3.72601	0.309967	3.60846	1.85665	1.97578	2.59405	3.63825	3.27784	2.51823	3.07771	3.39402	4.39267	2.36254	2.52448	2.71269	1.9481	2.50354	1.6494
NM_152355	126068	ZNF441	zinc finger protein 441	0.101573	0	0	3.61318	3.35301	4.08242	1.32028	1.44039	1.14261	2.8102	1.8565	3.96781	3.10478	2.57549	2.9129	0.857312	0.935831	1.08117	2.29718	2.33165	2.32317	2.95958	2.96829	3.66748	1.38163	2.20704	1.87831	0.902727	1.35513	1.94172	2.27586	2.9483	2.71956	4.35422	3.57669	2.82501	2.91699	3.0543	2.75851	2.74112	3.68408	3.04741	2.69022	2.37067	2.16111	1.22026
NM_001277092	162972	ZNF550	zinc finger protein 550	2.64255	2.9435	3.54761	2.99897	3.39331	2.91214	1.77789	1.90647	1.66905	1.40515	1.70876	2.50671	3.04594	2.27072	1.76321	0.835793	0.001062	1.71106	2.33573	2.8242	2.27621	2.27161	2.47327	3.2328	2.46818	2.32613	3.27104	0.388868	0.93075	1.06359	1.91425	2.197	1.65726	3.256	3.8241	2.86526	3.44447	3.19523	1.48046	2.97361	3.41383	2.71047	3.13794	3.18698	3.46055	1.59824
NM_001204817	84914	ZNF587	zinc finger protein 587	2.56262	2.82922	4.95904	1.06731	1.93523	2.99824	3.78001	1.59627	1.78867	1.54108	1.20782	1.89553	2.26593	4.18706	1.05262	0.003183	2.97694	1.16707	2.27159	3.99126	5.07001	2.75268	1.7077	0.762119	1.90865	2.70103	2.28987	1.38689	0.010021	1.02289	2.42555	2.51166	3.18089	4.1022	3.6943	2.04615	0.002236	3.32498	3.04093	1.66667	0.627135	1.87779	2.13895	2.77185	2.33027	3.17733
NM_001161425	162963	ZNF610	zinc finger protein 610	4.41829	2.28744	3.13518	3.23768	2.84984	2.69145	1.95706	3.13444	3.05869	1.36505	1.40978	3.53868	2.74281	2.45162	1.80455	0.56433	1.29877	2.23747	2.29475	2.58586	1.60934	2.60188	2.5645	2.87222	1.36501	2.39257	3.05027	0	0.57454	0.119943	2.79587	3.67396	1.63822	2.12594	1.72946	2.93622	2.78769	3.48048	1.45774	2.45201	1.81275	1.92137	3.2172	2.88552	3.17024	1.71002
NR_036521	100128252	ZNF667-AS1	ZNF667 antisense RNA 1 (head to head)	0.311675	0	6e-06	5.64655	4.98546	3.62176	0	0	0	2.75097	2.15462	2.9643	5.22216	3.95812	4.29297	0	0	0	5.52966	4.8524	2.99061	4.65751	5.95133	4.91525	5.24162	5.47414	5.86688	0	0	0	8e-06	7e-06	0	4.81931	6.04371	6.35773	3.86128	3.36409	2.82507	5.75613	6.51672	6.16977	4.50203	6.09373	4.98728	3.47574
NM_144566	90592	ZNF700	zinc finger protein 700	0.010019	0	0	3.29366	2.50217	2.69977	1.70281	2.80238	2.09795	2.54429	0.421356	2.5547	2.81218	2.31151	2.72024	0.720794	1.13348	0.957059	2.11792	2.42444	1.59744	2.12185	2.39241	3.91247	2.04455	2.01295	2.32198	1.06798	0.000431	1.35126	3.51758	4.03473	4.11378	2.2511	3.64049	2.94955	3.35311	3.25043	3.8853	2.11827	3.13362	2.62695	2.34939	2.26261	2.19477	2.75243
NM_001163474	155061	ZNF746	zinc finger protein 746	1.32854	1.51695	1.39425	2.87571	2.45034	4.65929	1.53148	0.723362	2.60712	2.40113	3.17126	2.44906	1.21093	2.74771	3.99261	5.76198	5.45438	1.26016	2.85683	2.23041	2.96031	1.88431	1.96514	0.000755	2.73752	2.17638	4.47165	6.25681	2.15581	3.8382	2.85014	2.12934	2.9257	4.71431	3.9947	4.85775	1.28747	3.41556	2.79257	5.75436	2.93808	3.28461	3.55717	3.40855	1.47102	2.32318
NM_001023560	7741	ZSCAN26	zinc finger and SCAN domain containing 26	4.86902	3.86146	4.8837	3.87354	1.81664	4.44266	2.50297	3.94067	3.24193	2.78873	0.603731	1.42903	2.49017	2.34632	3.16197	1.51734	0.000146	2.43854	2.45406	2.30741	4.20325	3.19062	3.05437	2.86184	1.77279	4.11331	2.70221	2.05258	1.89012	2.93679	3.72037	4.27032	4.83659	1.1978	2.57273	1.56437	2.24927	3.07568	2.70458	2.48459	1.29524	1.73366	2.10007	2.4669	2.51279	2.20104
NM_006299	7746	ZSCAN9	zinc finger and SCAN domain containing 9	3.19644	0.786822	4.11754	6.50052	6.81678	8.31852	3.59639	5.91651	0.695035	0.501166	1.28465	3.66961	2.336	2.19376	2.93375	0.000734	2.40179	1.97147	0.903582	1.08885	4.11643	4.33077	2.51053	4.87124	2.15081	3.88165	2.80571	1.23849	1.98129	2.43685	4.07648	8.64779	5.18102	1.61822	1.89683	3.17301	4.76991	2.39062	3.65726	4.27811	3.6709	5.65885	2.96463	4.24127	0.957479	1.99478
NM_017975	55055	ZWILCH	zwilch kinetochore protein	3.76125	7.10631	5.10055	2.80942	1.44272	2.7915	1.61609	2.42256	2.43608	1.64141	2.7452	1.22121	2.48943	2.35314	3.30903	0.700024	1.57829	2.41291	2.14267	1.24074	2.34772	4.08235	3.48974	3.70031	2.17912	1.10738	0.996265	0.575371	1.59266	0.00269	2.18518	3.94451	4.19328	3.83246	2.57554	2.6745	3.41131	0.794376	2.13016	2.49658	2.28914	3.38409	3.29536	3.03421	3.24402	2.7367
NM_001010972	7791	ZYX	zyxin	11.8622	14.9204	0.025433	0.016656	4.31793	14.5513	12.0373	9.998	7.4537	0.217647	16.7437	1.60638	10.8938	10.0956	8.49294	0.05967	23.6262	1.30635	21.4783	13.6746	9.65906	20.2507	9.22256	0.883137	16.6819	18.6605	13.6021	17.1367	20.7435	1.80943	10.0138	5.82059	0.290438	18.7761	14.5616	8.14719	11.3901	1.17753	11.834	14.3332	22.2678	26.2243	1.74639	7.49622	10.8942	7.41502
[truncated: 25 more columns]

## Sheet: Outlier transcripts (inter)
				FPKM
AccessionID	EntrezGeneID	Gene	GeneName	PGP1_1	PGP1_2	PGP1_3	GM23716_1	GM23716_2	GM23716_3	GM23720_1	GM23720_2	GM23720_3	GM25256_1	GM25256_2	GM25256_3	BYS0110_1	BYS0110_2	BYS0110_3	BYS0111_1	BYS0111_2	BYS0111_3	BYS0112_1	BYS0112_2	BYS0112_3	BXS0114_1	BXS0114_2	BXS0114_3	BXS0115_1	BXS0115_2	BXS0115_3	BXS0116_1	BXS0116_2	BXS0116_3	BXS0117_1	BXS0117_2	BXS0117_3	902_1	902_2	902_3	1601_1	1601_2	1601_3	1401_1	1401_2	1401_3	1001_1	1001_2	1001_3	901_1
NM_000350	24	ABCA4	ATP-binding cassette, sub-family A (ABC1), member 4	0.789903	0.36708	2.36969	0.217351	0.128843	0.150981	0.876736	1.28645	1.24651	0.218324	0.034729	0.147415	6.65499	5.09443	5.84728	13.3312	9.78841	18.5465	5.49749	6.39602	6.39552	7.45254	7.58919	3.27861	17.7066	24.6993	20.7077	2.6459	3.23669	2.97148	1.79035	0.985407	2.68935	0.947663	0.613642	0.628263	0.858348	1.30471	0.470458	2.20955	2.0903	1.08782	8.97271	9.81518	8.40559	2.93063
NM_005159	70	ACTC1	actin, alpha, cardiac muscle 1	7.73749	0.469224	13.1343	1.85009	0.224034	0.069591	0.547209	0.316747	0.277411	18.2338	6.37161	0.332088	18.4793	0.529392	0.461952	3.06575	2.90896	13.2142	14.9848	4.12518	4.62274	0.299364	3.58205	0.118681	2.2673	3.06813	0.734009	0.999225	2.89605	1.02757	7.98367	10.717	0.430501	0.668392	3.98553	0.628407	3.6562	3.29667	2.84142	1.60482	5.46937	3.49944	0.257308	0.319629	2.81101	0.518326
NM_000666	95	ACY1	aminoacylase 1	5.17693	6.12978	6.38546	0.589587	0.004561	0.396974	9.68515	7.82103	9.22255	3.13965	1.82781	2.89541	7.9586	6.80536	7.51162	11.7493	9.04005	5.63683	8.0065	5.88525	7.12788	10.756	8.97476	5.14905	6.4705	4.08102	0.000354	6.212	7.03845	4.91605	4.40964	2.04445	1.51246	5.16058	4.48224	2.26061	1.15415	6.1e-05	1.14095	5.60447	6.64722	5.89632	6.95576	11.6154	9.80236	10.2526
NM_006988	9510	ADAMTS1	ADAM metallopeptidase with thrombospondin type 1 motif, 1	13.6858	9.15274	14.2646	1.22377	1.0965	1.68616	20.4306	22.5519	21.3949	4.72138	2.83898	5.63055	20.0984	16.484	14.87	7.58633	7.24247	13.0613	13.8353	13.8662	11.5958	19.8244	12.6836	14.4275	11.9928	8.86449	10.9736	8.24172	8.32255	9.59067	6.29626	5.94438	5.29011	13.3268	13.2637	8.07752	4.73227	3.76633	3.67523	10.5742	14.3503	14.7442	15.64	17.031	14.8603	33.7302
NM_021116	107	ADCY1	adenylate cyclase 1 (brain)	1.74471	2.51614	2.16441	41.1725	42.557	46.1059	4.91369	4.28049	3.59498	14.5585	11.11	10.6279	2.4189	3.16444	3.47287	7.12521	6.11656	5.86279	2.82997	4.94553	3.50922	3.22484	4.32656	2.70576	5.29364	7.42662	4.7682	2.91087	2.61102	3.50707	4.84093	4.04378	4.89349	10.0076	11.4783	11.6962	12.5028	13.433	6.84369	4.88282	4.09988	4.59175	3.05873	2.27131	2.27524	0.951411
NM_001129	165	AEBP1	AE binding protein 1	14.2292	10.7995	12.458	3.11989	3.27034	2.85567	41.9428	33.9855	52.7715	24.1853	11.8803	20.3824	32.2539	31.0654	32.2198	53.6062	44.9711	30.3425	39.5891	34.1542	37.212	30.0531	26.1487	21.5934	32.2706	31.5272	27.4497	18.4022	20.6343	13.3296	12.9385	5.32535	9.0214	16.8984	17.2527	11.8098	10.7244	10.5435	6.1654	16.9547	19.3981	20.5371	16.6298	18.7943	19.9169	56.1249
NM_001134	174	AFP	alpha-fetoprotein	127.342	87.5242	93.0862	0.069191	0.023414	0	152.518	246.697	206.984	41.338	48.3203	75.2682	56.2903	28.5318	84.7836	7.8248	16.6242	64.2423	164.734	74.9115	89.0328	127.128	152.411	153.26	88.4276	3.49154	81.6076	39.8996	38.0577	31.0238	168.847	175.381	171.393	111.825	111.555	50.4461	5.93314	4.72401	13.8204	138.254	160.817	275.291	89.5228	77.9583	84.2609	38.4138
NM_006408	10551	AGR2	anterior gradient 2	2.25925	1.52596	0.462749	0	0	0	1.51227	2.01769	0.632742	0.422098	0.678403	0.853844	2.49382	0.85657	4.5355	0	0.085352	0.313331	5.0936	0.58357	1.38302	0.563201	2.1284	1.60869	0.815889	0.515133	0.826402	0.738192	0.478451	0.606765	0.28118	0.086114	0.175788	0.447944	4.70841	0.154654	4.27948	0.797205	4.99677	1.14674	2.45081	2.34728	1.72075	2.79833	1.37113	0.793693
NM_001622	197	AHSG	alpha-2-HS-glycoprotein	6.98902	5.25595	4.83015	0.061389	0.124589	0.208814	46.7939	40.788	57.4203	6.35315	6.68209	8.31741	7.60367	5.1411	11.1372	8.12861	16.2748	13.6333	15.9734	9.65113	8.80277	10.5576	7.15391	8.14972	0.666195	0.299676	0.385779	1.48557	24.6477	0.619393	20.54	12.8673	15.3685	14.0432	8.59604	7.57563	0.360518	0.093015	2.18657	10.8403	7.80045	25.8237	3.79467	3.45681	5.1791	1.48031
NM_178813	158798	AKAP14	A kinase (PRKA) anchor protein 14	3.63203	1.00545	6.94374	0.894628	0.382896	0.430322	0.362195	2.2307	1.42397	0.790965	1.0452	0.566472	10.1473	5.09267	4.78125	6.25366	6.52249	13.3029	5.81193	5.55286	3.29961	9.10113	6.54019	3.36648	20.1572	12.2744	22.4551	7.96334	6.62252	3.54345	2.8924	1.71051	3.03733	3.61153	2.65611	2.92506	3.43547	1.10966	3.02362	3.08997	2.71665	2.38152	8.78488	13.1139	10.7829	4.19251
NM_020299	57016	AKR1B10	aldo-keto reductase family 1, member B10 (aldose reductase)	4.04625	0.537077	1.84813	0	0	0	18.6195	16.3842	23.8056	2.26531	3.46282	3.55132	6.13093	4.81368	4.32044	2.01104	3.96692	3.74626	7.85851	6.34314	7.38645	4.51465	4.9864	6.17256	3.79279	0.552877	1.42356	1.79198	0.962849	0.609493	2.30513	1.28085	0.655312	30.0512	28.0546	23.8439	0.3902	0.091528	0.143442	3.41175	6.22802	5.79178	7.98172	6.24251	7.92259	30.8621
NM_000477	213	ALB	albumin	3.49953	0.520271	0.695064	0.06228	0.063235	0.094249	135.221	130.327	216.161	10.9077	3.54397	6.63123	18.4737	8.04627	5.80373	6.29027	19.0822	45.7687	10.3536	20.0463	4.08141	5.3548	3.60205	7.99805	0.902639	0.12674	0.718872	0.909739	66.8779	0.599489	2.5061	2.06612	5.27359	9.65133	10.9364	8.51627	2.585	0.063021	10.7332	2.56041	4.31406	7.55098	2.58466	1.08126	2.07412	1.15919
NM_000689	216	ALDH1A1	aldehyde dehydrogenase 1 family, member A1	7.64789	7.11464	8.4492	0.117666	0.099566	0.022261	19.6812	21.8041	21.0757	1.96668	1.0974	2.97337	2.60443	1.85385	4.28395	0.594293	1.05119	3.32388	4.84542	3.25261	4.11274	4.96902	3.02175	7.87314	1.61432	0.694452	1.79071	0.767531	2.32839	1.41606	2.54153	2.94375	2.39292	14.6798	46.5903	20.1273	2.05034	1.54818	3.35971	3.20763	2.9926	4.45552	3.18762	4.30557	2.98493	2.90083
NM_016519	258	AMBN	ameloblastin (enamel matrix protein)	0	0	0.23981	0.447034	0.382161	0.186874	0.037499	0.097275	0	0.031445	0.033737	0.095496	0	0	0.030595	0.035634	0	0.03497	1.00029	2.37003	2.91213	0.107711	0.228796	0.568623	0	0	0	0	0.035778	0	3.55018	4.95161	3.45892	8.05059	9.54934	8.96178	8.84395	6.28221	7.3098	1.31413	0.444394	0.922261	1.29442	0.349926	0.686728	0
NM_001633	259	AMBP	alpha-1-microglobulin/bikunin precursor	1.029	0.134615	0.248379	0	0	0	12.6473	8.90883	15.4281	1.36481	1.12208	1.15097	1.77144	1.01287	1.50711	3.09335	6.07574	6.1245	1.60511	4.31129	1.09142	1.35135	0.441022	0.876976	0.158423	0.083174	0	0.265832	9.14947	0.098193	1.51232	1.22296	1.98997	2.25975	3.16686	1.59735	0.120087	0.051609	0.700958	1.43725	1.73187	3.58844	0.401042	0.04215	0.522427	0.256709
NM_001278488	25906	ANAPC15	anaphase promoting complex subunit 15	1.19712	7.44559	6.15406	0.031905	4e-06	0.000219	1.93247	0.593402	0.489799	3.67201	5.90734	5.25525	3.9358	4.4087	2.87896	0.337101	0.120602	0.014244	4.26627	4.47898	0.515143	0.920108	0.004591	0.001241	3.37086	0.99825	0.001596	2.33143	3.41737	2.62829	10.0071	10.2693	5.23411	0.02773	3.79959	5.11489	0.437033	8.2793	4e-06	1.69919	0.000563	3.03125	0	0.27576	3.94366	0.298044
NR_015424	645784	ANKRD36BP2	ankyrin repeat domain 36B pseudogene 2	3.47408	6.56255	3.90198	24.9098	19.9469	20.0146	0.660031	0.513712	0.588346	1.67239	2.65134	2.35242	2.50221	2.90941	2.07099	3.7625	3.13602	2.99542	2.60171	3.18861	3.25678	1.85378	2.75795	2.02306	4.15498	4.06741	5.91841	6.79583	7.29969	6.57137	2.32032	2.70297	3.04325	10.4783	9.29235	13.5518	11.0936	8.58252	12.102	2.59441	2.78112	2.08926	1.98813	2.05192	2.24655	0.458013
NM_001162435	100287718	ANKRD66	ankyrin repeat domain 66	1.8891	1.27299	4.45413	0	0.049105	0.054826	0.154144	0.550212	0.515837	0	0.069177	0	5.39313	5.04012	4.66326	12.7293	8.69445	8.04851	2.16909	1.78413	0.986644	4.13314	4.84475	1.0879	8.76072	6.91065	6.44726	5.49696	6.51561	4.80303	0.773646	0.710835	1.12915	0.493234	0.291879	0.567383	0	0	0.076435	0.920747	1.89699	1.30537	5.68547	6.86945	6.36691	3.05891
NM_030920	81611	ANP32E	acidic (leucine-rich) nuclear phosphoprotein 32 family, member E	13.6139	22.6713	19.0942	6.29383	7.04862	7.04152	8.83435	8.9407	8.50092	6.72951	0.862008	6.38529	9.42636	9.87695	10.7695	0.398317	0.01628	3.6028	8.57203	11.0623	5.49533	9.18015	6.53022	9.75478	7.25084	3.97954	5.89027	4.83724	4.49274	4.78511	15.0226	17.6043	13.5735	11.1426	10.9062	5.49165	13.7681	7.96936	7.74456	4.45981	11.9273	9.36833	11.5303	12.2422	9.51785	10.3823
NM_000700	301	ANXA1	annexin A1	31.6051	16.0253	28.5708	2.64791	2.68682	2.75185	40.0196	43.2387	51.6238	11.9114	6.77115	14.0145	45.0274	47.3062	38.1672	6.91619	8.9947	16.5521	23.2118	19.6677	17.1622	56.8297	29.9952	43.6169	13.2906	6.00108	12.9236	9.79168	9.18531	10.7214	7.16183	7.40407	8.1011	30.4494	30.7812	19.2303	10.3297	6.20816	10.5276	18.767	35.017	35.2008	22.2243	37.8545	31.134	80.944
NM_001278407	311	ANXA11	annexin A11	12.3641	8.3759	5.3874	1.24101	0.818497	0.073898	6.78096	6.36006	9.48609	2.87173	2.7001	3.08506	11.0589	10.8465	8.34758	13.8395	10.4139	9.61096	11.6863	5.73405	5.02126	12.2097	5.56214	8.77805	12.2209	7.80309	7.4445	4.70804	1.5037	3.70507	0.00525	0.010991	0.004329	5.56248	9.75991	6.50191	2.65551	1.57768	0.49436	3.76218	5.25009	9.87783	13.5594	12.014	13.5485	20.0639
NM_005139	306	ANXA3	annexin A3	11.7118	3.01715	8.97036	0.684119	0.66406	0.843203	11.183	12.5403	15.6435	2.8601	1.57645	3.25658	12.7946	12.1332	9.47706	1.1254	1.83298	3.49084	8.67937	6.028	5.80249	11.8874	6.11511	8.47317	3.36671	1.30685	2.57058	3.11206	2.79999	2.18686	2.79822	2.52296	3.12787	14.3184	13.0705	6.66594	1.36251	0.721201	1.17736	4.37246	8.63936	9.19943	6.73291	9.31494	7.34707	32.5937
NM_001153	307	ANXA4	annexin A4	8.77334	6.80441	4.01034	0.808906	1.26518	1.04204	5.92421	6.12423	7.48204	2.86403	1.94413	2.78105	14.5461	8.20799	11.2433	13.28	9.86852	15.4042	9.16959	7.84244	7.70448	8.34134	7.5496	6.27178	21.9609	16.6294	17.4084	6.97815	6.31924	4.41841	5.35588	3.21016	5.40665	3.64804	5.65232	1.95379	1.97746	1.69203	1.66393	4.37906	4.38394	5.43847	10.0547	12.3329	11.3555	11.3809
NM_001040084_dup1	653145	ANXA8	annexin A8	1.61292	0.271596	2.5929	1.9e-05	2e-05	0	12.3021	11.6788	11.4311	1.60817	2.13586	1.94013	6.19713	4.19049	3.32314	0.591383	1.23562	1.02911	8.90889	5.98187	5.22008	5.37762	3.08078	3.73393	0.467231	0.18279	0.399439	1.10999	0.47937	0.771031	2.19798	1.04861	0.920067	8.16713	9.26151	6.07497	0.071146	3e-05	0.048057	3.80418	4.69309	7.58727	5.04113	3.38227	5.27406	23.8253
NM_001098845	728113	ANXA8L1	annexin A8-like 1	1.917	0.260797	2.49115	0	7e-06	0	11.5129	10.7161	11.1829	1.51726	1.93384	1.9152	6.85968	4.3091	3.81821	0.613955	1.79435	1.52318	10.1825	7.53407	6.34003	5.96082	3.23831	4.14078	0.569245	0.111055	0.289691	0.996428	0.440834	0.710843	3.05344	1.07443	0.868597	7.48511	9.03316	5.45056	0.069858	4.1e-05	0.047243	4.21361	5.25272	9.13405	6.02467	3.90859	5.81795	25.0239
NM_001272071	8905	AP1S2	adaptor-related protein complex 1, sigma 2 subunit	4.73515	9.88711	4.95963	47.7721	44.5282	32.5106	3.78617	4.75402	5.46135	5.77742	11.0839	12.0076	6.75741	6.84867	5.20201	4.47138	1.9566	7.62387	4.38414	5.02289	4.0815	7.0369	11.1724	12.3658	24.7347	21.0346	28.0318	12.0664	10.1261	10.5738	19.5788	16.9245	17.373	5.40831	6.69731	7.68548	5.60813	4.285	4.52215	13.3292	18.4524	20.1658	5.90562	7.12848	8.19134	0.277414
NM_000039	335	APOA1	apolipoprotein A-I	23.7602	35.1187	21.0404	0.177073	0.059796	0.20019	51.5175	56.2289	63.9213	24.9009	21.2883	26.293	23.2336	17.151	57.5203	10.3275	28.632	16.7978	61.9186	32.8169	41.0299	51.0456	65.8019	48.1981	14.481	2.73333	7.19441	16.1978	56.2278	9.73596	60.9479	42.6692	45.5331	38.0114	31.3356	19.8704	7.41484	7.65257	16.3596	43.0502	48.8453	82.8335	23.6626	33.4811	27.093	8.24113
NM_001643	336	APOA2	apolipoprotein A-II	44.2501	32.0029	24.5524	0	0	0	199.965	172.082	201.738	46.5534	43.1835	41.003	39.2969	27.8887	91.7462	24.9257	39.5443	37.3672	89.6013	51.6673	59.1328	132.945	88.2261	110.957	11.31	1.701	3.88317	35.7983	51.1558	9.12009	103.062	82.2995	110.63	149.108	107.824	67.7661	2.46497	2.70794	6.74178	86.2632	70.3607	191.878	45.6788	26.8077	59.2856	12.6965
NM_000482	337	APOA4	apolipoprotein A-IV	2.93871	13.8413	4.23143	0	0.033859	0	7.8133	12.0335	5.46508	2.85115	4.58638	6.76259	7.82503	10.7289	26.3018	2.22136	1.02769	1.13996	12.3435	3.19687	10.3469	12.0619	4.42685	9.60788	0.82741	0	0	0.572742	0.911223	0.528873	48.5116	19.2142	26.1681	9.75925	4.34955	6.25635	3.88031	6.51968	6.44196	17.6156	14.4875	44.7355	6.76373	3.30224	5.32078	0.703872
NM_000040	345	APOC3	apolipoprotein C-III	9.59399	26.4183	17.4091	0	0.118464	0	38.0866	32.5002	37.5977	12.7164	37.4464	23.1706	20.2755	20.9573	64.179	6.15349	21.7733	10.5619	36.1588	18.694	24.0086	76.3625	51.9414	51.1411	3.76576	0	0.544124	7.53352	34.1726	2.49941	101.084	80.4038	78.1946	67.5125	32.1681	38.415	4.4044	7.17859	11.3353	67.5473	61.4792	161.256	26.1503	17.4083	27.0528	4.54437
NM_000041	348	APOE	apolipoprotein E	45.1334	31.2327	51.6682	7.10342	5.19735	6.50738	152.73	104.173	169.956	33.3543	34.4533	31.4261	56.1488	58.0756	85.9737	100.978	95.566	40.066	110.745	94.186	100.779	83.7337	68.0602	47.7837	49.4279	33.9322	46.5416	51.7571	57.2232	33.4621	60.4408	31.5217	63.5138	50.7476	51.8928	32.7245	12.0779	12.1201	16.2467	39.6965	43.9579	46.9445	41.0397	51.4069	51.0669	135.035
NM_000042	350	APOH	apolipoprotein H (beta-2-glycoprotein I)	0.892029	0.329144	0.243356	0	0	0.047241	8.233	7.97008	12.5491	0.667516	1.13301	0.787924	1.51347	0.619896	0.434045	0.50433	0.810203	0.928641	3.06564	2.35598	1.51745	1.65305	1.75163	0.93786	0.774559	0.101752	0.523156	0.389674	1.19972	0.060007	1.25843	0.884252	1.32072	1.84195	1.05625	1.28266	0.195935	0	0.65897	1.13364	1.33157	2.92493	0.816906	1.08161	0.702199	0.251078
NM_198098	358	AQP1	aquaporin 1aquaporin 1 (Colton blood group)	40.4834	20.188	50.3907	3.3702	1.72727	2.15493	41.6733	33.4542	46.0083	17.9874	19.5363	17.8653	146.668	115.499	127.661	253.262	158.716	115.332	97.3588	67.2612	79.8059	97.6487	106.868	50.9171	278.749	244.863	247.485	56.5525	83.0196	50.2842	53.8283	28.7512	32.6338	113.038	100.838	75.9048	12.7666	17.3381	15.9179	73.3007	102.453	92.7146	180.045	170.12	185.275	182.075
NM_001175	397	ARHGDIB	Rho GDP dissociation inhibitor (GDI) beta	21.6722	7.3007	10.5543	0.164466	0.208487	0.139708	4.05794	2.29327	2.6273	3.61922	2.76298	1.83092	9.09999	6.88814	5.08071	0.870045	1.06496	1.09852	5.4301	3.93798	3.64983	9.58912	6.37599	6.7362	0.63632	0.25076	0.644688	1.60071	1.18278	0.94652	1.38643	1.8774	1.23345	6.70452	6.79284	4.87692	0.193142	0.373099	0.844532	3.63207	5.36983	8.37301	8.75133	6.90565	5.97866	10.3957
NM_001282746	219681	ARMC3	armadillo repeat containing 3	2.01913	1.56493	6.04749	0.221416	0.114538	0.147066	0.830564	1.42695	1.12539	0.907649	1.25343	1.62815	7.82312	5.19085	5.70253	6.07224	4.44804	11.0417	5.8876	5.83332	5.33853	6.98418	6.57167	4.40071	18.0048	13.345	19.6152	6.28784	6.55438	6.13999	2.56932	1.82105	3.4382	1.21468	0.391679	0.358339	1.12425	0.90704	1.17838	2.50011	2.64323	1.30923	6.98652	7.61986	7.52733	4.53654
NM_001024960	10093	ARPC4	actin related protein 2/3 complex, subunit 4, 20kDa	18.2311	16.1669	0.058149	22.6115	23.6839	25.6156	10.2459	0.01609	19.0483	22.4971	30.2541	21.8662	11.7059	8.19577	12.7275	23.0765	23.9651	0.860376	17.8469	9.59995	20.8525	15.4448	24.8255	19.9672	17.5515	0.01106	10.1562	0.927287	0.053111	13.1955	0.043442	20.8399	18.2275	0.096108	35.8271	13.0921	0.683538	2.03915	5.21654	0.79186	8.71753	10.9685	16.0308	11.2682	8.95927	14.4491
NM_183376	91947	ARRDC4	arrestin domain containing 4	11.4555	13.9296	12.2287	15.1437	14.2367	13.6682	3.71105	4.85742	4.02803	14.5313	13.2114	19.16	9.68991	8.1968	7.71972	6.51913	5.65771	10.5809	14.0841	12.9323	12.4913	0.558306	0.773875	0.572422	11.6821	9.35127	12.56	7.26455	6.9284	8.8762	15.6962	16.1623	15.4239	13.1651	11.6292	8.99378	11.6095	10.4094	9.66264	14.0893	17.1727	15.1628	15.2271	14.4808	13.1889	10.6133
NM_001012301	340075	ARSI	arylsulfatase family, member I	3.87631	2.83235	4.9227	0.259178	0.26325	0.228941	21.6775	16.913	21.3434	2.23474	2.25384	1.83367	7.03745	7.2521	8.44304	3.16535	3.83875	2.65558	11.833	8.08526	9.77373	11.3663	7.10662	5.41413	4.65562	2.86662	3.10864	6.56797	3.95023	4.70367	4.44816	2.34959	2.52887	16.3926	18.679	11.9841	0.608967	0.831434	0.777317	8.46474	11.0738	12.0418	8.12349	7.79526	10.1055	42.8878
NM_139058	170302	ARX	aristaless related homeobox	0.361303	0.147421	0.812572	0.414852	0.453742	0.471079	0.279884	0.29695	0.254996	0.234787	0.206168	0.151281	0.539222	0.237004	0.767591	0.532101	0.233387	0.213562	3.7227	4.45022	4.41569	2.43602	2.38256	2.88314	1.21505	1.73433	1.60878	2.55015	1.67735	0.807002	10.8779	5.28526	6.77756	3.83354	2.75816	4.02128	4.04884	4.04795	4.0777	4.61291	2.94573	2.28833	5.44153	3.74337	6.40747	0.265047
NM_014741	9776	ATG13	autophagy related 13	4.07256	5.54462	3.9497	0.002253	0.001821	4.8e-05	5.58661	3.76394	5.62667	1.54893	1.70586	2.96509	4.55047	5.6053	5.0375	7.20706	6.99067	3.99496	6.02161	5.93065	5.24477	6.50209	4.0414	2.62531	4.54075	4.78239	4.09537	2.9469	4.12612	2.81939	2.36965	2.12174	2.66175	4.53332	3.96442	2.86304	0.417147	2.49623	3.17725	2.64177	5.25347	5.09347	4.56251	5.9287	7.19868	5.39751
NM_145178	220202	ATOH7	atonal homolog 7 (Drosophila)	0.56214	0.336281	3.25584	1.9151	1.55456	1.59216	49.418	38.3225	43.857	0.298312	0.045705	0.431294	0.501458	0.560489	0.373597	1.44883	1.44885	0.521507	0.183329	0.470419	0.278781	1.07099	1.08462	0.924307	0.148417	0.272654	0.250667	2.49086	0.678102	0.275979	0.736499	1.04124	2.237	4.12514	7.05	4.95553	0.48735	0.676915	0.505163	0.477753	0.139041	0.517158	0.333976	0.039492	0.244737	0
NM_173694	286410	ATP11C	ATPase, class VI, type 11C	5.76308	2.61313	14.0602	2.67997	2.45867	4.44844	3.37282	4.37283	3.70901	1.61717	1.70781	1.14443	13.0159	9.56918	9.93966	9.21121	8.07153	16.4472	11.2305	11.2506	8.95761	22.5621	20.0757	12.2612	38.724	34.1146	42.8001	11.2084	10.5833	10.4671	10.3392	10.1664	19.8266	6.45353	2.6822	3.00996	3.3095	2.38022	1.58557	9.00933	8.51274	4.51488	43.0648	43.1243	40.4691	7.02123
NM_000702	477	ATP1A2	ATPase, Na+/K+ transporting, alpha 2 polypeptide	5.74428	5.81817	9.42424	51.7393	46.285	50.0128	6.60776	5.25909	4.59682	58.1045	47.5511	52.3379	15.661	13.3887	14.214	25.3317	27.242	21.6735	11.1607	11.4588	9.65189	18.1856	22.5389	19.3796	23.9859	25.0452	20.4852	9.75268	12.9775	10.443	9.97157	7.65224	9.05619	3.83844	4.50275	4.60898	20.5636	23.548	16.9388	14.1622	15.3739	13.7291	17.033	17.3716	17.8966	3.57488
NM_021949	492	ATP2B3	ATPase, Ca++ transporting, plasma membrane 3	0.568325	0.932113	1.96326	1.3825	1.64616	1.25605	0.432862	0.732197	0.826452	0.00015	0.656518	0.000152	4.68331	3.19557	3.95098	12.0457	9.17713	9.90646	1.30506	1.01749	2.1026	2.88433	1.66791	0.882956	1.28422	1.96694	1.74337	1.98988	3.1717	2.82054	0.637412	0.495138	1.00492	0.598755	0.814562	1.71596	0.606264	1.55963	0.00018	0.750242	0.419516	7.6e-05	3.24359	4.04166	2.97292	1.84569
NM_001199097	8938	BAIAP3	BAI1-associated protein 3	1.76028	3.59668	4.91009	3.11275	3.94771	4.64774	1.21864	1.4746	1.72087	3.05438	3.34204	3.49223	6.62118	8.117	6.81599	20.7973	15.21	8.11015	7.72025	8.93485	10.178	6.34025	7.85353	5.92963	7.40976	8.58452	9.21417	7.49394	9.08486	7.62171	3.72074	2.55678	3.66983	2.0995	2.29855	0.960216	2.38106	3.13377	2.66914	6.71286	6.29817	5.36547	6.43124	6.07358	7.31292	1.41737
NM_012342	25805	BAMBI	BMP and activin membrane-bound inhibitor	43.2095	26.5578	38.5242	3.27125	2.89802	3.01843	42.4042	40.596	43.2621	13.739	10.8843	8.95846	55.6628	52.1965	49.9312	32.5235	29.0519	43.4561	39.2712	34.6307	31.4418	60.2677	36.3198	35.6618	24.8534	15.0238	21.0479	30.4923	22.2354	18.8301	20.6679	15.9184	18.3295	34.1495	38.6287	27.8983	5.63328	4.83302	7.15725	39.5182	37.5685	41.4586	47.5713	58.8064	57.9955	78.4951
NM_005581	4059	BCAM	basal cell adhesion molecule (Lutheran blood group)	14.5097	7.67668	12.4151	1.66243	1.12807	1.26527	24.9146	19.969	26.685	6.795	4.47294	4.88702	14.7811	15.6664	20.0768	28.3152	25.7808	15.3513	24.1281	20.6538	22.2667	21.5787	18.7238	12.5508	19.3673	19.353	18.5907	12.9854	16.336	11.6532	11.6041	6.13384	12.2876	12.4564	12.9444	8.63799	6.92394	5.96855	7.25286	17.5639	17.4088	17.3468	18.9935	19.8501	23.7906	27.0913
NM_021948	63827	BCAN	brevican	0.575687	1.55366	1.27967	12.885	11.2472	14.2778	0.186071	0.078175	0.08788	4.91735	5.70088	5.33385	1.26255	0.922131	1.7529	3.53465	3.78354	1.77123	1.45106	0.607337	0.603104	1.04245	1.70651	2.25892	2.52768	2.43926	2.12259	1.13542	1.37523	0.768673	1.57933	0.571857	0.467943	0.739785	0.631647	1.31853	3.02113	4.63348	4.02065	0.52803	1.41867	0.388661	0.617907	0.967501	0.626707	0.256858
NM_001012978	340542	BEX5	brain expressed, X-linked 5	6.56489	17.3168	9.29618	24.2315	25.3532	19.1799	1.04971	0.681609	0.351614	4.83122	6.39635	8.70335	5.44367	4.37532	4.98955	1.89165	1.91736	3.91452	3.03207	2.75614	1.24854	3.1166	4.5668	4.8594	5.49781	6.43794	7.83507	7.77059	5.86453	5.39426	7.1486	6.67483	6.80282	7.606	10.967	11.9135	17.1383	14.0246	17.4547	6.79975	7.36827	5.41705	1.71749	2.11035	2.01182	0.594475
NM_001711	633	BGN	biglycan	9.44811	7.93211	10.0478	0.465611	0.491096	0.441359	2.60042	2.54889	2.82879	7.65921	5.00764	7.85714	7.18947	8.96416	9.71775	11.4094	11.0297	6.65493	13.7531	10.1592	10.6619	10.3062	9.69101	7.12565	4.21276	2.70966	2.00076	5.10768	5.86134	5.14978	3.09767	2.1352	3.2338	3.84427	3.78175	3.16782	3.03004	3.39797	2.37699	4.6794	5.45776	6.31002	6.98668	7.97598	7.81558	11.8523
NM_152414	27319	BHLHE22	basic helix-loop-helix family, member e22	0.504742	0.618066	1.12841	2.1265	2.21439	2.21787	2.90103	3.49885	3.34871	0.518995	0.537862	0.761118	0.806934	0.577883	0.834642	0.040558	0	0.039787	1.2913	2.03777	1.65597	0.878152	0.716691	1.14412	0.457462	0.343058	0.400527	0.398424	0.407789	0.40604	1.0448	1.5932	1.29768	11.5351	11.4653	10.9945	12.9627	7.84611	6.13823	1.0582	0.836153	0.995561	1.12325	0.614583	0.782369	0.080815
NM_130850	652	BMP4	bone morphogenetic protein 4	5.73002	1.26262	6.91292	0.053795	0.084943	0.00081	10.207	8.40153	10.0376	3.10452	0.340575	3.18309	7.38791	6.88544	6.59899	23.4712	14.0749	7.46235	7.97477	4.66466	7.07511	11.4327	6.05559	4.64611	2.44985	6.93185	7.08715	6.82896	8.54667	3.59919	2.36365	2.70947	3.44051	5.19672	7.64061	3.42564	0.732091	0.921128	0.992667	5.92435	5.13566	6.6435	8.19799	8.36485	9.32148	11.1507
NM_001719	655	BMP7	bone morphogenetic protein 7	9.32641	6.95569	10.5701	6.05125	5.27058	6.43399	8.24026	8.30498	8.45868	7.57641	7.58282	6.24903	14.5557	12.8626	13.5626	26.514	21.0408	22.2236	25.7055	29.6227	25.6711	20.2006	21.6155	13.9199	31.3202	30.2681	30.8366	15.848	15.8445	12.3546	22.5723	12.6998	21.2179	5.58572	5.63969	4.86645	13.5173	13.5019	11.6456	23.97	18.6224	16.3353	34.9207	34.569	38.2639	8.65067
NM_001717	646	BNC1	basonuclin 1	13.0851	1.63071	5.53943	0.048499	0.029522	0.021965	13.4492	12.4174	18.3398	2.01687	1.13152	2.1984	12.286	7.76952	6.34459	0.973025	1.6156	4.9049	8.18082	6.15279	5.79737	6.39462	3.45059	5.83119	1.44356	0.148468	1.36438	0.526102	0.006691	0.984183	2.46036	1.59101	1.39901	9.4409	11.1042	5.93208	0.239708	0.088534	0.231544	3.5354	5.70458	6.81336	6.54264	7.15551	6.50402	36.6867
NM_199051	339479	BRINP3	bone morphogenetic protein/retinoic acid inducible neural-specific 3	5.01964	6.33682	3.51589	8.58447	7.94361	8.71907	0.025351	0.032873	0.084686	5.97574	4.13107	5.64146	2.78212	2.76919	3.74116	0.747027	0.930124	1.56037	1.97327	1.73839	1.57454	2.06301	4.02518	5.41172	3.68118	4.07721	4.45801	1.86824	1.55011	4.04318	3.13284	5.13613	3.0839	0.568858	0.711029	0.535753	2.91341	2.17353	2.32157	3.96728	4.03955	3.85007	1.62647	1.04588	0.88055	0.192054
NM_004335	684	BST2	bone marrow stromal cell antigen 2	21.8316	6.57954	20.8285	0.607159	0.461546	0.343507	63.2633	60.9632	73.2713	10.9868	9.17303	9.47678	43.3571	40.8854	40.283	10.542	14.4758	13.358	45.8309	46.0876	45.1187	39.5411	26.2698	25.3944	20.2487	8.5126	12.0371	11.7912	8.10096	5.37816	12.3897	6.26923	9.60064	39.1423	40.0503	26.1478	6.53512	5.34742	7.98032	10.5755	17.6828	14.8572	57.6456	51.2629	62.8384	98.0261
NM_207645	399947	C11orf87	chromosome 11 open reading frame 87	0.800828	0.9303	0.849303	16.1543	16.9247	17.5086	0.071699	0.108445	0.119705	3.82091	5.0283	4.87525	1.65304	1.88071	1.96671	0.693176	0.645966	0.991914	1.0418	1.43579	1.40763	1.26986	1.85063	1.86354	1.04899	1.70201	2.19809	0.952531	1.14345	1.3548	2.22079	2.10237	2.58302	4.56073	4.04102	5.0051	2.94777	2.60933	1.92887	1.98365	1.75385	2.4041	0.708371	0.810201	0.450188	0.905815
NM_001100388	399949	C11orf88	chromosome 11 open reading frame 88	14.8649	5.42335	29.7935	0.078642	0	0.177506	0.874447	2.84007	2.93105	0.417881	0.782654	0.844663	46.7289	36.2832	30.6719	46.3252	39.6657	57.5749	20.1438	22.0666	18.3638	32.3318	35.61	15.7554	97.0821	65.5244	90.7592	44.681	40.228	19.8844	4.60543	4.17521	8.55002	2.60879	1.32378	2.61246	2.03174	3.75535	3.47682	7.33316	4.95986	5.14065	34.6428	47.2672	38.5978	16.907
NR_026731	387978	C14orf23	chromosome 14 open reading frame 23	0.678515	0.506762	1.07383	1.32674	1.77954	1.18851	0.686478	0.578362	0.595079	1.30603	0.853373	0.879225	0.781098	0.689287	0.661129	1.04033	0.770517	0.850741	1.74505	4.49601	4.70038	0.629959	0.676654	0.657131	0.759969	1.12846	0.714256	0.514837	0.667247	0.99314	11.4427	6.47171	10.9222	20.0038	19.5857	20.3384	8.02594	5.01661	5.83383	2.07815	0.593812	2.45256	1.18521	0.441308	0.613461	0.630038
NM_001164257	92340	C17orf72	chromosome 17 open reading frame 72	1.8112	0.003799	2.4934	0.002859	0.002918	0.003319	0.004572	0.002966	0.003733	1.29442	0.488035	0.003931	4.29657	2.80055	5.11893	17.4603	11.2636	5.3925	2.8004	3.15897	2.96178	2.68992	3.86661	0.614951	8.51297	2.91183	4.49443	5.38767	5.27906	4.21025	1.22593	0.00021	1.19545	0.621522	0.568369	0.004257	0.273342	0.714037	1.4e-05	1.76268	0.004161	1.01968	3.66463	5.12122	5.04173	0.000604
NM_001013625	257177	C1orf192	chromosome 1 open reading frame 192	24.2706	10.8059	45.9019	3.77486	3.1848	3.94718	4.77524	8.58198	8.37133	6.31797	9.84824	7.70195	52.9629	48.3828	46.212	91.7254	61.1707	66.9836	33.2047	34.4812	28.8598	45.8421	39.1947	20.3319	90.658	76.9687	77.7282	71.4509	74.1903	61.5485	17.7327	13.5559	20.1927	6.27027	3.69893	4.39851	4.67735	8.30953	6.37232	21.1023	21.4618	13.3377	60.6628	79.3884	67.2221	12.785
NM_001122961	127003	C1orf194	chromosome 1 open reading frame 194	2.68827	1.29861	5.24915	1.67909	1.15862	1.80882	1.09073	1.3382	1.72623	2.73681	2.92938	2.15148	13.1447	13.0015	14.7008	49.6342	38.0902	27.4537	8.14211	9.45696	8.541	13.8135	12.9816	5.11695	27.3611	31.9674	32.2167	26.5127	25.0867	16.8085	5.14426	3.73059	5.31694	2.32315	1.55937	1.33996	1.97084	2.06478	1.43776	5.05809	4.64011	2.25426	10.0027	9.45185	7.77038	8.00214
NM_006365	10485	C1orf61	chromosome 1 open reading frame 61	8.14497	4.84181	3.71347	85.5028	74.1692	63.5446	0.480965	0.374705	0.563701	55.1539	71.9262	59.8426	6.37692	6.70632	9.13302	15.0575	24.1218	5.91906	19.8622	33.5681	30.3581	16.7667	32.43	39.8103	33.3715	37.2738	30.4398	20.3513	23.797	10.239	47.3447	49.9071	53.7118	79.4615	68.3199	69.4362	76.086	82.1724	117.656	46.1764	33.9358	30.2009	45.8669	17.7898	29.4276	0.181657
NM_144580	112770	C1orf85	chromosome 1 open reading frame 85	8.47544	5.16178	5.19025	0.945798	0.137052	0.472003	8.49101	7.41917	9.1669	4.47442	4.06102	4.33816	8.98097	8.49688	9.41672	10.4672	11.2996	6.46585	8.9877	7.53674	9.33039	12.8566	5.66892	5.00401	3.8969	1.12116	2.07285	5.10036	5.017	5.7367	3.24667	1.61692	2.43401	2.82321	3.49264	2.68604	1.85943	1.51587	1.55962	5.67856	4.97652	5.65613	6.25221	9.14682	6.5013	20.6178
NM_015991	712	C1QA	complement component 1, q subcomponent, A chain	21.4988	4.80885	6.2175	0	0	0	0.66328	0	0.431547	2.2223	2.91113	2.49791	6.83645	6.383	6.98865	0.069961	0	0	4.25428	2.10389	2.83014	18.2786	11.734	13.1549	0	0	0.217643	1.08046	0.910395	0.599185	0.493126	0.528615	0	4.48111	3.07027	2.10215	0.108771	0.139959	0.146213	2.2643	4.2997	6.92846	10.2714	5.37072	6.5502	9.40306
NM_000491	713	C1QB	complement component 1, q subcomponent, B chain	36.6709	5.36045	7.3903	0	0	0	1.0167	0	0.850616	3.86442	4.42208	3.44522	8.74518	7.97097	5.75544	0	0	0	4.51509	1.44838	2.00241	20.2962	11.8928	11.4326	0	0	0.076961	1.14601	0.594225	0.353147	0.785073	0.400739	0	7.25695	5.21264	2.37501	0	0	0.31022	1.73507	3.70728	7.0863	14.9988	5.57599	7.66194	14.5584
NM_172369	714	C1QC	complement component 1, q subcomponent, C chain	33.4571	3.17971	6.09622	0	0	0	0.822814	0	0.974977	3.90384	4.69524	2.50312	6.71061	6.43457	6.33802	0	0	0	5.9185	2.20183	5.39137	18.1021	10.7625	11.0553	0	0	0.403842	1.42023	0.847549	0.30983	1.14684	0.701141	0	5.99922	4.50717	2.31729	0.201573	0.390796	0.134713	2.57554	2.91736	9.29406	13.6697	8.06254	6.86641	12.5768
NM_178456	128602	C20orf85	chromosome 20 open reading frame 85	6.15035	1.52886	8.00616	0.145946	0	0	0.695405	1.20437	0.776736	0	0.207582	0.098004	7.34397	7.30018	8.07206	18.4621	12.8119	7.13115	6.44615	5.19283	5.51549	8.65868	6.32701	1.63175	14.1546	13.0632	12.0559	16.8005	13.3729	10.8593	2.07105	2.2592	3.14841	2.96284	1.22822	1.60158	0.171313	0	0.343875	1.77734	2.1131	1.07812	7.01123	8.32687	8.65505	5.57679
NM_032411	84417	C2orf40	chromosome 2 open reading frame 40	1.32119	0.550334	2.55995	1.12029	0.425324	1.18606	1.7797	1.01128	0.372661	0.186121	0.498182	0.470384	4.92296	4.6379	7.74486	26.4754	17.8277	10.0585	2.65103	1.54643	2.34102	1.27841	1.23734	0.223785	3.01958	2.30255	2.07461	5.9547	9.68324	5.71363	0.869437	0.684594	1.2786	0.829479	1.01042	1.12702	0.49315	0.526761	0.550217	1.32693	1.11538	0.940783	1.18245	1.46136	1.81108	2.51911
NM_182500	130813	C2orf50	chromosome 2 open reading frame 50	1.64719	0.637202	3.18511	0.387972	0	0.32932	0.308633	0.751129	0.516415	1.09858	0.692544	0.261475	2.81698	3.27648	3.65909	5.49289	4.31286	3.30933	2.78401	2.2029	2.04605	2.36444	2.65975	0.855729	5.9969	7.74622	6.68224	3.01537	4.69057	3.06621	1.46297	0.553491	1.21115	0.658378	0.350645	0.781026	0.455568	0.366241	0.382602	1.38266	1.33641	0.980117	3.85777	6.69768	4.44696	1.23951
NM_001089584	134121	C5orf49	chromosome 5 open reading frame 49	2.91465	2.33738	5.58269	1.30447	1.08734	1.14923	1.08639	1.6102	1.19268	2.26495	2.76569	2.10858	8.90867	8.25591	6.75934	20.4147	14.6741	12.1867	5.79501	5.09493	5.38745	7.77137	8.4949	3.35894	11.6122	10.9599	10.238	12.6954	10.6101	6.80452	2.8343	2.00131	3.51476	2.05599	1.17638	1.34072	1.02922	1.27103	0.926552	5.67916	4.89518	3.05432	10.5151	12.1116	11.9438	5.52485
NM_001048265	138162	C9orf116	chromosome 9 open reading frame 116	6.55999	4.364	14.0998	0.930652	1.25572	0.590784	3.31136	3.98674	2.16678	2.34939	3.52998	2.18575	12.2627	14.2571	14.6087	43.0683	34.0979	15.6779	11.5745	11.0699	7.89535	14.5901	15.2853	5.69349	26.3202	20.5966	23.8683	24.617	22.7024	17.0914	4.3407	4.42247	4.95119	3.06122	2.06378	2.15565	2.45776	2.56378	0.844527	7.51279	7.28893	3.54263	15.8358	22.9947	19.3895	10.7705
NM_001010940	138255	C9orf135	chromosome 9 open reading frame 135	2.53524	1.982	5.79877	0	0.063788	0.142347	0.600597	1.03987	0.754291	0.083776	0.358896	0.169417	5.87534	5.02235	4.67102	12.3439	5.9946	9.33232	3.10784	4.71471	4.39563	5.36858	3.44463	1.81385	10.2942	9.74531	10.2278	12.2915	9.67341	6.04825	2.34638	1.12912	3.76746	0.640081	1.06104	0.921736	0.369686	0.28464	0.198219	2.81607	0.547503	2.03275	6.96297	5.80739	8.15692	4.15809
NM_001282957	389799	C9orf171	chromosome 9 open reading frame 171	2.17477	1.22944	4.23686	0.246905	0.167042	0.124425	0.349685	0.652237	0.730688	0.879766	0.668452	0.593659	5.27092	5.07764	4.85315	14.1392	11.4097	6.64057	4.22458	5.05591	4.79402	5.6098	5.4218	2.56249	10.3309	9.6128	9.03225	6.57285	8.54597	7.59836	1.89966	0.850483	1.60353	1.2606	0.364469	0.602929	0.547865	0.873602	0.391101	2.82084	2.51102	1.8536	7.90228	10.5907	9.51366	3.5168
NM_147168	84688	C9orf24	chromosome 9 open reading frame 24	7.88618	6.20847	21.1454	0.971637	1.24289	2.17014	1.95087	2.80501	2.11534	1.57661	2.7542	0.642201	32.2825	34.8951	38.4671	82.1235	70.0035	31.4749	13.8491	14.5465	13.2486	25.7971	26.8085	9.58089	47.2993	44.533	38.181	55.2617	71.0317	57.1784	3.29223	4.31	9.18916	3.27172	1.64132	2.73924	3.7e-05	2.55819	3.15201	7.98062	9.49676	5.98587	30.0952	43.6856	36.4229	12.4583
NM_001218	771	CA12	carbonic anhydrase XII	2.81229	0.884158	1.74868	0.777128	0.451974	0.46999	2.55162	2.69936	2.74765	0.000113	0.189917	6.8e-05	6.78236	4.04945	4.28696	9.2976	6.48453	17.4524	3.91721	4.51963	3.55274	5.78783	4.51885	1.67644	10.1995	9.58548	9.92082	1.85683	2.96767	3.14277	0.742336	0	2.08649	1.42952	1.8969	0.96149	0.754931	1.24194	7e-05	2.13883	1.2992	0.952653	4.04352	4.14804	5.39692	6.26356
NM_000067	760	CA2	carbonic anhydrase II	24.7756	13.657	51.7612	5.55711	2.92206	4.17956	17.2073	24.6916	25.3416	4.42261	3.23192	4.8656	59.7662	54.1359	52.6098	60.1862	43.8058	117.626	38.5773	41.2344	33.6611	58.6385	62.61	31.8413	145.961	122.365	149.826	71.5839	69.4559	70.0369	38.6898	35.7899	55.7863	11.1192	8.55174	8.13999	14.7453	12.4378	12.5984	17.4424	17.0861	13.8069	76.9371	90.1417	75.2486	40.2803
NM_004056	767	CA8	carbonic anhydrase VIII	3.11368	1.511	2.7394	86.404	74.9573	71.8109	3.32612	4.94807	5.12115	7.13803	9.06788	8.83233	1.58066	1.60221	1.2767	0.619822	0.863754	2.09831	2.82079	2.33711	1.84695	1.46739	1.85764	1.74771	1.3977	1.19888	1.48113	1.37671	1.02729	1.38821	2.21516	2.66994	1.53842	0.766384	0.939223	1.04893	4.68569	6.83098	4.50955	1.53329	1.36741	2.07449	1.93028	1.85188	2.23249	2.74754
NM_014333	23705	CADM1	cell adhesion molecule 1	23.2612	12.1567	19.2683	0.990497	0.634875	0.25698	8.74295	10.5462	9.28325	4.68649	4.67791	5.41697	15.3703	17.5063	13.8531	5.71533	4.74464	11.3116	8.66724	7.70753	7.85119	13.4974	12.8561	17.7107	10.7101	9.81864	7.30926	4.7091	3.95616	5.07648	4.59732	2.96529	5.803	3.99066	4.93865	4.94153	5.0254	2.26813	1.3365	4.23806	8.52908	5.78769	8.02189	12.5049	8.30348	26.388
NM_004929	793	CALB1	calbindin 1, 28kDa	8.22746	8.41259	16.2182	39.5697	36.3051	34.7182	0.873816	1.69979	1.776	4.2999	5.16493	5.73864	8.24796	9.57193	8.64629	7.75172	5.60947	8.25774	3.86307	4.55629	3.08639	7.11119	6.90565	3.29969	10.4155	7.76346	8.60165	8.23939	8.20599	8.20685	6.29195	9.71734	7.36044	2.92527	1.10393	1.2848	3.64834	4.38309	2.92759	6.40057	4.38114	4.25006	20.0243	22.8476	22.7285	2.89579
NM_001740	794	CALB2	calbindin 2	1.70802	2.74715	2.6544	17.949	20.2944	18.9572	1.89318	1.47067	2.02789	6.58714	6.11594	7.78478	2.40145	3.44442	3.87625	7.06407	7.30001	5.0656	11.4882	20.4986	13.3047	4.69691	8.4112	7.03103	4.67002	5.41494	6.44837	5.99389	6.12913	4.91439	6.64196	10.1547	7.40377	47.7235	50.9633	45.5793	80.215	60.579	56.4925	11.3496	8.46253	8.81362	7.82797	4.99757	9.49434	0.598456
NM_015722	50632	CALY	calcyon neuron-specific vesicular protein	3.58822	3.95363	3.39349	15.3184	17.8261	17.389	2.77249	1.74503	1.96853	3.79888	3.24126	3.20191	4.02847	4.42561	7.6966	17.4612	11.4372	5.2483	3.94148	5.8357	5.53208	3.9424	4.25679	2.70937	6.77188	8.82165	7.35498	10.7448	13.1574	12.1353	7.49812	6.80298	6.59205	7.2567	6.29909	8.50598	15.1952	15.3861	15.8231	5.80537	4.74845	3.12971	1.92724	3.64433	1.6131	0.634955
NM_024046	79012	CAMKV	CaM kinase-like vesicle-associated	3.35224	7.05517	3.70126	20.6008	22.6871	23.7637	3.68378	3.11429	3.15682	6.92807	8.75817	6.85138	3.79907	5.08649	6.45817	6.75193	7.33763	3.00889	7.22738	12.837	10.8307	3.59601	5.63697	4.92104	4.01279	7.73544	6.10191	7.13406	8.90372	10.8229	15.587	15.6932	14.8603	42.4075	38.8037	52.7625	40.6615	35.699	34.2277	11.9017	8.00027	10.2555	6.55593	2.68043	4.10072	0.364831
NM_001256139	822	CAPG	capping protein (actin filament), gelsolin-like	13.2031	6.76138	8.13421	0.458506	0.426312	0.346309	12.9921	9.41624	13.9654	3.57953	3.78019	3.76545	14.2904	19.5875	15.8414	4.44838	6.86888	2.89304	10.607	9.13647	8.6972	15.968	8.36013	8.35058	2.30728	0.478591	1.01903	4.40623	2.51958	2.97012	4.74693	2.86642	6.62255	15.8877	13.9114	10.4622	3.09625	3.02229	4.9344	5.28715	9.17996	9.50294	4.4107	7.84644	6.95926	26.1416
NM_004058	828	CAPS	calcyphosine	1.99738	3.5484	10.554	1.3169	1.24526	1.39443	1.55553	2.62783	2.74935	2.79791	1.28316	1.65862	11.9704	11.1501	11.7367	19.6112	12.6104	6.03636	6.48848	7.42328	7.11292	7.35029	9.26024	2.75955	14.0144	13.1682	13.0736	11.497	14.3576	10.9737	3.50626	2.63631	2.24805	1.73087	1.28612	1.53438	2.60137	3.26393	4.12259	4.56226	4.01364	2.81928	6.40386	7.91419	6.96736	4.10511
NM_001042625	133690	CAPSL	calcyphosine-like	5.39497	1.90042	9.95257	0.291632	1e-06	0.181493	0.59682	1.60489	1.56968	7.2e-05	0.994319	0.866436	13.7411	9.70749	9.13633	8.12822	7.97648	18.2835	4.61539	5.19855	4.0547	9.30813	8.89808	3.17886	23.8135	17.7405	27.0393	9.11425	9.31536	9.54349	0.003599	1.66046	3.65687	1.81825	0.77479	0.317546	0.880811	0.808946	0.511431	2.03642	2.40941	1.51571	10.0576	11.4697	9.75864	6.36278
NM_004291	9607	CARTPT	CART prepropeptide	3.18866	1.36074	2.44039	7.89238	10.9145	10.2268	0.457985	0.237848	0.153338	1.45693	0.903586	2.09374	0.697653	0.311426	1.79886	1.39054	1.02318	1.53719	2.71103	2.5455	3.09994	5.17556	5.28769	5.53574	0.533469	0.210628	0.72038	1.42958	1.91102	0.8265	1.02212	2.72327	2.20331	4.78475	5.41015	4.63782	1.42037	1.30306	1.54268	3.43705	5.84499	4.72919	0.825031	1.55992	1.23027	2.68167
NM_001752	847	CAT	catalase	17.4199	15.3287	17.5044	6.78199	6.86564	6.91654	8.22976	9.45943	10.2716	10.3128	12.6053	11.5367	21.0698	17.8802	17.558	0.092018	0.03288	0.361169	7.11896	8.75476	6.25036	9.26995	8.8974	8.06135	24.5544	19.7262	21.8297	2.37662	3.45081	2.71868	0.754741	0.924858	0.304523	6.51628	6.58035	6.8813	10.892	9.0657	8.18801	10.6227	10.4149	9.96475	21.5988	22.095	20.5087	5.95804
NM_001145018	283152	CCDC153	coiled-coil domain containing 153	1.35409	1.22178	2.62412	0.645853	0.072645	0.405124	2.05176	1.40652	1.43223	0.381431	0.612529	0.385577	3.56718	3.4924	2.98839	11.9974	9.82698	4.25056	3.54018	3.60997	2.92071	4.6945	4.60993	1.71965	6.51924	6.64206	6.32078	5.76762	7.54788	3.69735	1.27294	1.05241	0.714613	1.09279	0.86284	0.630016	0.589652	0.539711	1.24022	1.35965	1.35083	1.25319	4.00733	3.96322	3.71101	3.87184
NM_012337	25790	CCDC19	coiled-coil domain containing 19	2.90196	1.29299	8.72787	0.371213	0.080738	0.210535	0.676018	1.56197	0.776739	0.531373	0.53202	0.537859	7.04658	5.62252	5.72381	4.21511	2.62432	5.31908	3.47293	4.69007	4.05361	5.54227	4.16611	2.69001	12.7106	11.4575	11.9231	3.89528	3.34414	3.40389	2.0239	1.38415	2.92237	0.992657	0.608375	0.23305	0.840911	0.964914	0.504081	2.38303	2.04135	0.967301	8.86934	9.32731	7.04234	3.47857
NM_001258307	91409	CCDC74B	coiled-coil domain containing 74B	2.90064	2.89005	4.03025	0.950631	0.67132	1.00198	0.619991	1.04622	1.80062	0.363326	0.704931	0.35047	4.07252	3.35891	5.115	17.734	12.8874	6.62989	3.50242	2.66684	1.34442	5.20079	4.28009	1.90611	5.76293	3.86906	4.17142	7.22906	6.91069	5.67603	2.8933	1.10774	2.78226	2.84067	2.33758	2.85996	0.855613	0.714892	0.941099	5.22949	3.16536	3.63188	2.81043	3.80543	2.90133	2.92051
NM_001174138	885	CCK	cholecystokinin	0.093371	0	0.451181	0.593805	0.075128	0.41893	0	0.076561	0.098756	0.098603	0.10555	0.199335	1.65174	2.88711	1.90641	6.25984	3.7429	2.21855	1.3624	0.670853	0.970948	2.07997	2.14471	1.2232	0.799702	2.07886	1.41124	7.10943	9.65923	8.7579	1.24438	0.8466	1.23151	1.63217	1.07071	1.52042	1.24644	1.3392	1.3988	2.0263	1.63228	1.63341	4.2204	5.57689	7.6277	1.13051
NM_002982	6347	CCL2	chemokine (C-C motif) ligand 2	22.0358	26.2379	23.565	1.48451	1.42745	1.50815	12.4953	11.6374	12.0484	5.52179	5.06646	4.18606	12.2413	10.8375	9.56319	5.14117	5.25956	2.52752	4.68326	4.37116	3.12861	9.14536	4.64686	7.94143	5.02671	4.33849	2.89151	3.66898	2.45216	1.80516	4.47646	2.90263	3.81768	8.41194	12.3132	8.79674	3.22364	2.0088	4.19639	9.33898	9.24153	6.97747	6.26285	7.64824	6.65746	5.33796
NM_004701	9133	CCNB2	cyclin B2	20.8591	30.147	22.9326	4.9026	3.20031	2.93851	11.391	14.3584	15.3418	7.67206	8.98858	9.7058	10.0754	9.91223	11.1273	1.93731	1.82263	5.00957	10.8692	10.3169	9.72798	13.0503	11.5727	14.1185	4.59857	3.81078	5.44493	5.89826	5.16599	7.74089	22.2261	24.7033	24.3887	10.5151	13.8331	8.59874	11.7365	10.1715	12.8018	9.43388	8.70624	11.3427	7.76101	8.69428	7.42352	9.64693
NM_021147	10309	CCNO	cyclin O	1.18031	0.748601	3.491	0.264735	0.104954	0.109585	0.354842	0.310881	0.43265	0.284386	2.3e-05	0	2.49828	2.95096	4.04082	7.91238	4.59734	2.47201	7.25752	8.11391	6.85074	5.20466	7.38541	2.51683	8.30414	6.44489	7.28632	4.75529	4.79079	2.38143	1.55357	1.88502	2.79216	2e-06	0.176917	0.422957	0.557324	0.797089	0.984755	3.46432	2.56227	2.11123	6.33254	9.24131	7.3071	0.820899
NM_020404	57124	CD248	CD248 molecule, endosialin	11.6566	6.93558	8.01745	0.288999	0.385189	0.328098	9.0429	7.82427	9.40527	4.61384	3.11076	3.79087	11.2728	11.1957	15.8762	7.17174	6.92563	3.38406	10.4621	7.989	8.44449	14.6136	11.7512	7.92341	3.98464	1.61019	2.19024	5.12007	4.70327	5.34883	3.0143	1.562	1.99304	5.69238	5.67578	4.41964	1.0185	1.37146	1.0031	6.30392	7.42965	7.15845	8.26544	8.71806	9.19478	17.2337
NM_014880	9936	CD302	CD302 molecule	1.96562	1.77957	2.52974	0.146644	0.001599	0.505184	0.433684	1.58735	0.753988	0.922844	2.19919	2.11845	3.50523	2.27268	2.18733	2.83332	2.2672	5.31077	4.82052	5.76407	4.55439	2.30744	4.03026	2.8674	9.67779	6.61941	11.7153	2.59547	2.28165	2.47357	1.35523	2.18843	3.26448	0.499518	0.844224	0.000187	1.33374	0.58172	1.17021	2.05728	2.07863	2.63648	4.50449	4.06579	4.11409	2.14753
NM_153826	4179	CD46	CD46 molecule, complement regulatory protein	16.0477	7.81625	14.5338	3.50668	1.91808	1.84011	14.5928	19.4717	20.4061	6.39489	6.70559	3.28867	11.7714	8.56609	9.49746	11.5484	7.93583	25.6611	15.2073	10.8346	9.92538	15.3926	11.4358	10.9083	12.1845	9.44518	9.4066	0.82589	2.29817	2.82442	9.43702	9.10495	7.29989	8.95049	7.96943	1.67857	4.7768	2.64551	6.4311	1.99255	5.51499	2.60653	9.72018	16.4851	12.1152	15.3369
NM_145057	148170	CDC42EP5	CDC42 effector protein (Rho GTPase binding) 5	23.3575	13.5848	15.1288	0.952191	0.422015	0.67278	23.3688	19.962	27.4823	7.9196	9.07698	8.32888	22.8498	23.1643	27.2557	18.7599	18.8279	9.70288	28.8922	25.126	23.54	26.8201	23.1828	20.3896	8.44745	4.9315	7.34616	21.5884	13.992	12.4615	9.39713	10.7674	7.32124	14.7241	12.6085	9.75584	4.40177	3.31929	7.87177	12.4239	16.9907	16.8146	9.68181	15.5958	14.8821	27.1594
NM_004360	999	CDH1	cadherin 1, type 1, E-cadherin (epithelial)	6.9349	2.66508	6.70485	0.288182	0.443919	0.295774	12.1615	11.2967	13.1371	3.03671	1.60333	2.44515	8.10774	7.11661	7.03379	0.860239	1.60318	4.34329	9.44697	7.83678	8.20745	12.1115	6.19407	8.7091	2.5166	1.60137	2.40488	1.34231	0.964703	1.69459	4.73726	2.79154	7.15775	8.38664	12.7177	6.06253	1.13589	0.876619	0.856913	4.79636	7.0169	10.0581	4.96875	6.05494	5.19923	28.0318
NM_001793	1001	CDH3	cadherin 3, type 1, P-cadherin (placental)	13.8759	3.36118	8.73159	1.85062	1.80535	2.0847	17.8643	15.713	17.674	7.30496	4.04938	3.9625	18.9266	22.2611	19.4664	10.3986	13.9054	12.1085	15.4474	11.5386	11.397	22.1934	11.2584	11.0543	6.70594	4.7271	5.28981	7.49016	7.47546	6.29655	6.10966	2.65978	4.98004	12.8733	15.3498	9.38421	3.42197	3.13387	2.77344	10.5328	14.2667	16.0302	12.1214	17.0653	14.4797	46.9086
NM_005195	1052	CEBPD	CCAAT/enhancer binding protein (C/EBP), delta	8.81011	2.51264	1.85691	0.358128	0.242144	0.811355	10.009	8.59033	13.2963	2.49469	2.1055	2.20193	10.1051	12.9021	14.1814	6.61685	5.86304	2.71717	11.3791	7.91567	9.38118	9.76626	6.75077	4.98643	4.31169	2.23282	1.80982	4.64895	4.94179	3.2641	2.18923	1.94676	1.92356	13.7904	12.8137	12.1787	1.44866	1.26407	2.57835	6.5446	7.50725	8.10465	7.12014	9.92917	10.9661	16.4116
NM_000204	3426	CFI	complement factor I	6.26541	3.88398	7.84963	0.021654	0	0.024575	11.6323	11.5276	12.5148	0.723684	0.465894	0.732623	2.66707	2.77818	3.91387	1.90256	1.61743	2.1245	5.12595	4.33616	3.721	5.15553	4.31831	4.50219	3.63104	3.38416	4.43012	2.06685	1.81194	1.56304	0.538181	0.706583	0.434217	1.80671	2.43305	0.634495	0.228932	0.2629	0.274692	4.24899	5.75824	5.41613	3.06444	4.37628	3.19468	5.81617
NM_016139	51142	CHCHD2	coiled-coil-helix-coiled-coil-helix domain containing 2	0.167222	0.174224	0.09717	134.726	107.015	117.81	72.9792	55.6862	68.5439	0	0	0.089351	1.93318	2.24606	4.32441	0	0	0	95.3338	94.8556	98.2746	15.0716	10.8987	6.16433	126.195	105.015	112.017	275.339	306.301	250.597	164.603	148.398	154.107	144.72	148.16	135.103	14.8249	21.2148	21.4283	186.693	195.732	160.733	51.8386	72.1872	52.423	107.76
NM_173695	286464	CHDC2	calponin homology domain containing 2	2.76259	1.78168	4.46281	0.289587	0.465452	0.246421	1.23073	1.47162	1.18898	0.419255	1.07259	0.914097	3.78894	3.22662	2.82427	4.2759	3.56447	12.1945	2.85604	3.43877	2.81114	4.82399	4.53645	3.26571	10.4493	7.83651	11.2361	5.35866	3.37563	3.13408	2.57033	1.77163	3.10402	0.657249	0.524677	1.02523	0.822056	0.768747	0.841462	1.1834	1.15699	0.880637	4.2986	5.47272	5.30058	3.20337
NM_001253387	10752	CHL1	cell adhesion molecule L1-like	0	0	0	28.8575	29.584	29.4089	0.619028	0.19022	0.408011	6e-06	0	0.035461	0	0	0	2.66356	1.16543	1.83574	2.32801	0.000235	1.64676	0	0.004544	7e-06	8.02442	7.07161	11.5258	4.96465	4.38734	6.05716	2.98712	6.40766	3.65479	0	0	0	0	0	0	3.64038	4.42753	2.91076	6e-06	4e-06	6e-06	0
NM_001206602	1123	CHN1	chimerin 1	31.0464	7.18175	13.1628	1.51586	2.31695	1.49072	5.87828	9.30482	7.34171	5.61767	1.6448	8.54677	34.4493	31.0552	24.2254	2.7372	2.87219	5.0274	15.6432	10.4452	9.43709	26.0889	12.9119	19.9425	4.81421	1.99952	4.14518	3.61071	1.95911	4.22133	8.35801	12.6677	7.17563	14.3233	12.009	5.55122	2.8287	1.34041	2.31258	8.53594	16.8834	17.2514	16.2566	16.773	15.1052	49.837
NM_000743	1136	CHRNA3	cholinergic receptor, nicotinic, alpha 3 (neuronal)	4.01787	2.62181	3.73566	1.82333	1.81028	1.66609	17.6495	17.1124	19.8607	1.55924	2.18553	1.97936	4.58299	3.55418	3.88325	0.509508	0.780091	1.63132	3.13887	2.93105	2.57987	3.01439	1.95891	3.05341	1.25749	1.0047	1.06078	1.2681	1.00313	0.792983	1.26519	1.29494	1.14666	3.83023	4.989	3.49545	0.70866	0.854215	0.500702	1.80814	2.31212	2.67174	2.25217	3.13266	2.68007	5.57282
NM_021101	9076	CLDN1	claudin 1	3.39137	2.22261	9.00993	0.84163	0.520965	0.761793	5.97774	6.70391	6.53285	2.14689	2.30442	2.12049	7.75964	5.16718	6.68508	11.2663	6.4146	14.5536	3.85446	3.92658	3.678	7.4098	6.21445	3.90574	24.9653	18.7134	22.6045	6.41282	7.29799	5.36153	3.29211	2.68245	3.19003	1.47945	2.05122	1.19476	1.12782	1.01936	0.835403	3.51628	2.73421	2.42953	7.71428	10.2736	7.63241	3.37727
NM_001306	1365	CLDN3	claudin 3	2.25491	2.71717	3.80702	0.545539	0.47427	1.05947	2.04727	1.97231	3.73506	0.831731	0.334399	0.525986	4.52341	5.26432	5.77791	10.5452	5.99464	3.81797	5.41509	5.98127	5.67097	3.68314	3.90414	2.37927	8.86806	4.89612	6.54018	7.77129	8.55913	6.78636	2.69713	2.16063	3.0532	1.72135	1.17501	1.31248	1.18983	1.88655	2.27891	2.27781	2.37527	1.73468	3.15592	5.39206	4.71391	2.03358
NM_001305	1364	CLDN4	claudin 4	4.96056	3.96646	4.45834	0.181597	0.210658	0.205999	4.83678	4.85291	4.93978	3.77815	2.15667	2.56125	11.0618	17.3439	13.5954	9.81982	10.1031	5.93687	9.15066	5.25802	8.30997	22.3242	12.0615	11.9492	10.5052	4.9718	6.03738	6.73125	5.12539	4.52824	4.28274	1.56587	3.20606	7.72611	11.592	8.43668	1.95023	1.14087	2.01408	6.21796	16.544	18.9645	6.55567	12.5655	9.48013	14.6711
NM_003277	7122	CLDN5	claudin 5	4.28019	6.17283	14.4339	4.86461	2.9965	6.18678	3.02197	2.01021	2.60044	4.52395	5.31822	3.93275	23.1166	19.2924	29.783	123.011	72.296	40.1045	20.5463	18.4247	22.8438	23.2037	28.3675	9.30018	32.5101	25.722	30.4279	18.3621	27.653	15.5705	6.6614	7.75192	13.1666	2.82258	2.4445	2.77851	4.62392	6.01007	5.78949	13.5867	10.6596	6.60943	13.9667	20.9565	16.0106	5.97741
NM_021195	9074	CLDN6	claudin 6	11.2339	3.54037	7.8421	0.430365	0.545723	0.203209	6.7961	6.15036	5.25216	5.55188	2.77132	2.66376	13.1801	23.1095	19.824	6.45447	10.4007	8.14782	10.3806	5.41727	6.73371	33.358	12.0038	16.3171	4.55519	1.09391	2.75813	6.93416	3.80586	4.13174	6.30161	1.69626	15.6711	13.5324	21.3322	11.5552	2.40084	1.14008	1.58814	9.21833	11.4535	15.7781	4.26554	15.2077	9.39694	41.5353
NM_053277	54102	CLIC6	chloride intracellular channel 6	2.27387	1.71181	5.62126	0.562871	0.45905	0.67545	1.21398	1.80768	1.50462	0.350137	0.239177	0.177282	11.0336	7.14513	8.00851	22.5788	14.0208	34.0718	7.09428	8.62133	7.06792	6.24703	8.53762	3.93583	12.6679	13.7128	12.8804	5.39041	7.472	9.35479	1.43573	1.26139	3.50199	0.973124	0.675885	0.792892	0.852225	0.759285	0.547817	2.38518	1.71187	1.20732	8.53836	8.73116	7.85583	4.42005
NM_033401	85445	CNTNAP4	contactin associated protein-like 4	5.35818	2.053	3.77512	25.3777	26.2075	24.5572	1.12307	1.71166	1.26036	2.33189	1.65495	2.85313	5.47456	4.03125	4.5254	0.243485	0.645855	0.943465	2.3111	1.68262	1.38556	1.25545	1.02883	1.14456	1.65956	1.78591	1.62927	0.736151	0.122773	0.814408	1.26426	2.18395	1.32074	3.31237	3.36426	1.59975	3.192	4.46414	2.31505	2.31438	4.59814	4.11217	1.53487	1.87481	1.57709	0.027798
NM_021110	7373	COL14A1	collagen, type XIV, alpha 1	12.2766	7.94502	10.9647	0.260783	0.418418	0.304205	18.5614	16.9008	16.4173	1.84726	0.927545	2.18737	10.6689	7.69023	10.3579	2.22852	2.98226	4.22827	7.83457	7.5484	6.53949	12.2448	7.60974	8.19538	3.68512	2.47367	3.09747	2.70516	2.30549	3.23808	1.8035	1.35528	1.97644	3.58245	4.20966	2.46421	1.8223	2.95519	2.83707	3.72941	5.97958	5.00126	5.46396	6.92162	4.67591	12.877
NM_001855	1306	COL15A1	collagen, type XV, alpha 1	88.2585	27.4834	22.9494	1.15943	1.93003	0.985874	23.8124	30.34	32.0634	31.1364	16.8502	23.3323	99.8688	130.881	89.871	22.1567	28.3263	29.0975	80.6256	70.226	54.2593	142.17	70.8397	60.1393	33.8188	5.40505	17.7088	29.0393	14.297	16.1464	14.2356	5.04598	4.44636	36.5989	38.5711	27.4342	5.87399	2.46427	4.71869	25.8129	42.1948	53.8562	66.4141	103.2	83.6422	255.504
NM_001856	1307	COL16A1	collagen, type XVI, alpha 1	13.4873	16.9917	15.3561	1.57149	1.79942	1.2148	13.6188	14.0587	13.7914	11.9203	6.57097	10.2767	25.7478	24.1249	29.0268	11.0985	13.591	8.07201	19.9552	15.0381	15.9692	21.738	13.784	11.6379	6.90198	4.20068	4.93382	9.18017	8.09822	6.44121	3.64021	2.03098	1.85631	9.23878	8.76246	7.21328	3.93641	3.93193	4.31155	7.50339	9.75784	10.6095	10.6775	13.7467	12.9578	23.7088
NM_130445	80781	COL18A1	collagen, type XVIII, alpha 1	35.9281	28.9679	40.9141	3.81178	3.30231	4.99353	28.1097	25.9148	31.0318	14.5081	8.92783	10.2214	37.8041	41.6718	50.6287	89.3019	76.7649	39.8294	54.2822	45.9028	49.9298	54.973	50.2925	31.0962	42.6473	35.7792	33.358	32.7823	36.3644	27.5766	25.4695	14.5213	22.0428	22.5813	20.9839	17.2968	7.41308	8.16164	8.09643	29.6056	30.9654	29.2246	39.9358	47.0412	49.3394	39.3319
NM_000088	1277	COL1A1	collagen, type I, alpha 1	167.607	197.932	179.536	5.75423	9.10213	4.62134	136.237	126.627	168.263	236.654	116.067	174.053	457.158	561.576	597.259	219.727	240.582	136.295	391.418	284.67	307.341	630.463	437.03	315.042	119.874	46.9047	62.3753	151.573	118.242	116.497	82.5384	31.7861	63.7453	161.412	170.589	117.912	47.8103	45.9422	41.5665	226.76	282.795	325.127	302.387	345.158	353.706	599.725
NM_030820	81578	COL21A1	collagen, type XXI, alpha 1	15.5485	5.14264	10.4149	1.50991	1.22717	0.722946	14.4347	15.0347	16.4187	7.08821	5.25355	10.9645	25.8541	16.9356	14.8628	1.53766	2.01739	3.81887	11.4802	10.5627	8.70443	14.8736	9.70727	10.9199	6.49211	3.38605	4.23492	2.74119	1.97434	2.66745	5.18947	4.59378	3.15855	15.4655	13.3438	6.90681	2.16675	1.73832	1.50796	7.13826	10.8375	10.9075	12.149	10.4132	8.93714	61.7294
NM_001844	1280	COL2A1	collagen, type II, alpha 1	8.1388	8.86511	16.8796	0.983607	0.767386	1.38723	32.6297	31.2641	32.0909	8.72482	4.65815	5.71595	10.5303	15.4861	13.1536	53.512	37.3633	31.3565	20.7512	13.8212	19.1164	26.6246	19.1414	11.9629	36.1918	23.3889	17.8131	12.3383	10.4421	5.56565	16.8572	6.73652	13.7163	15.1284	16.1274	11.2492	5.06635	11.0997	2.24534	16.6016	15.7139	11.3533	28.5316	31.6189	34.1575	9.53169
NM_000090	1281	COL3A1	collagen, type III, alpha 1	2110.25	1469.11	1599.71	24.6703	35.3365	12.1777	1621.35	1512.34	1833.44	1088.28	657.419	1022.28	4052.79	3445.43	3136.38	646.726	942.45	1156.97	2173.64	1844.82	1593.41	3912.01	2061.61	2082.31	1071.08	266.734	619.394	959.755	524.129	582.773	782.75	321.96	296.919	1718.73	2087.55	1314.22	214.792	129.114	199.052	1229.86	1947.33	2377.61	2249.82	2530.72	2476.24	7255.19
NM_000495	1287	COL4A5	collagen, type IV, alpha 5	11.6264	8.75549	16.954	5.78665	5.22228	5.62419	18.5641	20.5644	19.6542	11.0958	8.04396	9.75318	21.6607	17.9897	19.378	50.8404	36.8642	46.5699	26.6427	29.075	26.6852	41.0865	37.9393	25.917	54.1158	53.4098	49.987	38.8774	41.6547	39.6713	35.3464	25.898	33.3828	22.4182	22.4595	19.1499	7.83196	6.80279	6.57841	41.0189	29.1772	30.9061	55.4499	58.7859	57.8359	22.5799
NM_033641	1288	COL4A6	collagen, type IV, alpha 6	5.76564	4.69966	9.75702	3.40181	3.10632	3.86992	9.69595	9.42016	11.1294	3.26393	2.55664	2.65765	10.29	9.052	10.1192	38.6018	27.6538	27.0456	17.7987	19.1856	16.0895	28.746	25.4357	16.5744	39.105	39.9565	35.3685	22.8891	26.4536	23.7343	27.0992	21.3794	27.7954	19.7615	15.6201	16.5629	6.57139	6.09005	4.90138	31.8699	21.8853	18.0721	42.7177	40.931	43.2451	10.9107
NM_000093	1289	COL5A1	collagen, type V, alpha 1	105.953	46.8861	37.6137	3.35934	4.1901	2.88168	50.1949	47.8226	59.3785	53.0768	29.5056	37.0414	131.415	140.912	122.895	52.136	59.836	43.2245	113.357	91.2238	88.995	148.75	108.043	77.291	38.8591	14.992	20.0705	37.2313	25.0809	27.7308	31.2098	10.8666	16.9451	50.6127	55.6376	39.5419	12.2589	12.795	10.5113	51.3841	59.0938	77.9912	85.5544	90.9796	100.948	272.914
NM_000393	1290	COL5A2	collagen, type V, alpha 2	69.8319	70.8578	82.3689	5.5082	6.64283	5.02614	82.5016	80.8331	92.7238	60.5209	39.0697	52.3339	124.599	109.745	90.4133	46.2153	51.2038	80.1604	86.894	73.5524	64.5506	153.952	72.2026	79.5166	37.5482	14.6008	25.3745	32.6884	21.5183	21.773	30.1704	16.1133	16.3498	51.9243	64.1716	39.7839	15.5564	11.0853	14.5303	49.1247	63.5661	90.2587	63.2632	89.1242	77.4704	237.392
NM_057166	1293	COL6A3	collagen, type VI, alpha 3	23.3757	24.8569	25.2996	1.7993	2.15723	0.87626	17.7774	22.4326	18.7952	31.8763	14.5025	22.1389	35.3483	39.3969	33.0608	11.9468	14.995	19.6692	36.8749	39.9069	31.9282	54.6039	31.7674	27.4861	7.84029	4.85523	6.04865	9.78275	5.98057	9.91049	14.1103	6.61188	6.77855	16.3027	26.53	15.6997	5.17963	5.67897	4.62521	14.0388	17.2646	21.3835	19.8852	27.2988	23.1559	62.4438
NM_005202	1296	COL8A2	collagen, type VIII, alpha 2	17.3985	5.39728	8.66517	0.959684	0.825725	0.663978	17.6902	13.9753	20.6524	6.20744	5.20395	5.24004	25.2385	28.6774	28.2983	23.5304	22.8677	13.8078	22.4837	13.1669	15.5096	25.4771	14.1957	12.2503	13.5908	7.60256	8.80118	10.868	10.4163	6.77778	7.93326	3.38924	4.74901	12.2467	11.6732	8.55401	1.75282	1.75548	1.76086	10.546	15.2621	15.2584	13.031	17.9777	17.2841	50.8119
NM_078485	1297	COL9A1	collagen, type IX, alpha 1	2.02498	3.79742	7.64311	0.898953	0.791308	0.901792	8.7763	8.95411	8.19285	1.65677	1.15164	0.535479	7.26147	7.98892	6.75955	12.0995	8.42645	9.63175	4.22725	5.08189	4.09166	4.09476	3.59487	2.69822	7.10732	6.6613	6.31451	8.20293	7.85064	5.49135	6.6351	3.82605	3.59378	2.48515	2.06488	2.55876	1.7627	1.807	1.3909	3.77198	2.94049	2.81376	3.69009	3.85057	4.39934	2.91907
NM_001853	1299	COL9A3	collagen, type IX, alpha 3	30.2576	13.569	18.8179	1.00606	0.908101	1.2267	27.0899	25.4434	31.0136	5.38153	4.14409	5.9782	28.159	32.556	36.894	28.0912	25.3632	10.9974	36.8053	29.413	30.5256	20.1634	16.774	10.9058	13.1971	7.87172	9.56365	17.1249	17.1329	10.9524	10.8488	5.07654	7.78629	13.3606	13.6218	10.9734	8.16353	9.36373	9.13362	8.07637	11.3186	9.62576	13.654	17.1505	16.7599	17.437
NM_130386	81035	COLEC12	collectin sub-family member 12	22.3442	7.86093	26.3912	2.56234	1.53789	2.56283	20.0839	27.5179	25.7687	5.97996	4.22314	6.31149	29.0779	20.5434	21.7113	17.1501	14.1289	36.9412	17.3024	14.5255	12.7452	27.4976	19.9489	15.7176	29.8955	20.0936	30.4214	12.4599	13.0692	14.1412	10.1583	10.2155	11.4209	10.3218	11.0712	6.57063	2.41162	2.85378	2.08041	13.1259	14.2447	16.9431	23.8001	27.8207	23.1909	36.6786
NM_000754	1312	COMT	catechol-O-methyltransferase	10.9624	11.1161	10.1835	9.24284	8.96789	9.44847	5e-06	0.830692	0.428055	14.8321	12.8584	13.456	20.1579	20.2545	23.3807	8.52177	6.02715	2.86708	11.0995	12.237	11.4766	24.1075	19.8057	13.8418	15.4016	12.6563	14.8246	6.29981	5.55534	5.22024	4.87853	3.42867	4.08637	13.5411	17.139	11.8065	10.4393	10.0632	11.3368	14.3756	16.1092	13.2465	11.8296	12.1731	12.9688	28.0635
NM_016429	51226	COPZ2	coatomer protein complex, subunit zeta 2	15.1379	12.9342	10.6303	0.744942	0.928924	0.647956	5.4668	6.44707	7.09246	7.09375	6.04674	4.93686	26.092	27.7247	21.9936	6.22446	7.49474	4.92702	10.9183	10.1281	7.58383	25.8283	14.4879	10.4627	7.78312	2.86337	4.65791	6.66614	5.18463	5.0974	4.67684	1.77476	1.61997	11.0733	11.2462	8.80714	1.14373	1.12339	2.07621	10.1792	13.2064	15.2697	21.7859	25.6038	24.6514	32.613
NM_000096	1356	CP	ceruloplasmin (ferroxidase)	3.71334	1.70623	7.00436	1.18501	0.779147	1.53451	0.777263	0.932198	0.830207	0.65795	0.390526	0.573874	9.83969	5.54469	6.3773	9.87517	6.10666	13.1346	2.99369	2.12071	1.72979	10.4411	7.88945	5.43204	18.9966	17.3794	18.2971	7.44684	9.15166	10.9116	0.751358	1.05459	2.04355	1.30681	0.717874	0.568156	0.97158	0.846233	0.994396	1.37626	1.65195	1.23221	3.84668	7.37765	4.77719	2.65471
NM_024913	79974	CPED1	cadherin-like and PC-esterase domain containing 1	9.89155	4.60661	8.45099	0.034604	0.070214	0	4.99033	5.68048	5.94409	1.26369	1.08422	2.02452	6.31366	5.38238	4.93429	0.837584	0.818474	1.89287	5.37364	4.3497	4.50041	10.3742	6.78865	7.56991	1.94491	0.529726	1.32545	2.26276	1.08831	1.73133	1.81644	2.15116	1.25257	3.34939	3.12805	2.02522	0.52974	0.265307	0.498182	1.46264	3.63151	2.66799	4.44353	5.29228	4.55721	10.1116
NM_001008220	10814	CPLX2	complexin 2	0.941764	0.176851	1.53617	5.50218	6.96299	6.23065	9.43448	6.19119	5.51981	4.80379	2.70049	4.43834	1.6537	0.730681	0.455395	0.000143	1.25659	0.000926	2.28632	7.55424	5.67769	1.73784	2.15653	1.41576	2.16182	1.19372	1.23147	1.60673	0.697018	0.985902	7.10174	7.63565	7.34525	11.5228	12.5853	11.5482	12.9795	12.6707	7.36132	3.69357	3.60977	3.93079	1.50944	0.677623	0.758475	0.000222
NM_152926	8904	CPNE1	copine I	19.4349	10.2893	6.82128	6.66126	5.89902	2.00428	24.0392	21.5234	19.8104	18.1696	18.0152	13.8264	14.7843	21.0436	23.2751	41.4217	32.7604	17.7005	2.04179	0.010046	2.88654	20.0533	22.2389	17.2379	9.24611	13.2379	6.76254	20.8096	18.3095	26.1156	19.5195	17.057	16.5199	19.2719	17.4382	13.7549	0	0.008649	4.73627	1e-06	5.9e-05	6.31498	20.4399	15.5829	18.2693	18.4801
NM_001122633	1373	CPS1	carbamoyl-phosphate synthase 1, mitochondrial	7.18636	6.62284	8.12647	1.10258	1.1119	1.49103	10.769	12.1018	10.8612	2.15992	1.855	3.69418	5.55946	4.81745	6.21445	1.04059	0.005282	1.661	4.29971	3.64745	3.53356	6.79132	5.75007	6.49353	3.36051	2.17451	2.7231	1.47922	0.003102	2.10109	3.53441	4.93506	4.97542	1.66761	1.78471	1.11376	1.77896	0.895927	2.38233	2.86483	3.51081	3.51589	3.43418	4.2801	3.34013	8.12144
NM_198148	119587	CPXM2	carboxypeptidase X (M14 family), member 2	5.88245	3.32017	6.09474	3.44934	2.96113	2.96637	5.48259	8.05069	7.31166	2.90958	1.67502	2.73237	4.41103	3.37828	3.39498	4.6231	6.22162	8.52801	10.345	10.2381	8.20958	6.38032	5.50393	3.43144	22.0604	22.5659	23.4182	2.45732	2.22264	1.73871	2.97589	2.12076	5.22271	2.11197	1.79184	1.70862	2.58272	3.15724	1.90998	5.33604	6.00457	4.53766	14.0768	14.9373	13.5215	3.00951
NM_001014447	8532	CPZ	carboxypeptidase Z	10.4753	2.32998	1.62329	0.000787	0.000858	0.000974	17.4205	13.6144	17.4655	3.17728	2.89582	1.80005	17.1093	19.5799	18.0281	3.43632	3.61793	1.45376	13.6831	8.75452	5.81969	13.7865	10.2052	6.80868	2.5953	0.999345	0.001313	2.69804	2.96839	3.24994	3.32118	0.660348	1.37169	4.65345	5.27957	1.96534	0.000158	0.000174	1.65084	4.44296	8.68185	10.0569	5.58377	9.50107	11.8695	31.282
NM_052854	90993	CREB3L1	cAMP responsive element binding protein 3-like 1	15.7251	6.70172	7.56264	1.29077	1.13838	1.3113	16.303	13.5207	19.678	7.33749	4.80274	5.72712	16.2158	20.0677	18.2403	8.26308	10.6805	6.64231	16.65	13.2506	14.2485	21.0277	14.0559	11.5611	5.75301	2.53044	3.07643	6.38534	6.28619	5.84013	4.85457	2.41099	3.06704	8.99916	8.33456	6.66925	1.93535	1.90892	1.72506	9.65674	11.2327	13.0732	15.5022	15.0496	17.5566	38.9019
NM_001311	1396	CRIP1	cysteine-rich protein 1 (intestinal)	6.76592	12.1713	20.0961	1.10325	0.973501	0.928004	2.61682	3.4055	3.48296	1.27287	0.776444	0.917329	5.5474	6.16067	6.46788	11.5456	8.35726	3.45428	2.52619	3.71639	4.7996	8.14941	9.62627	6.0986	10.0834	6.36148	6.79615	7.97238	13.6624	7.22148	4.15467	1.5705	2.94935	4.62879	5.76776	3.62661	1.94062	2.66581	3.85373	6.65985	5.16861	5.69553	8.32083	9.18705	8.4859	5.53181
NM_031476	83716	CRISPLD2	cysteine-rich secretory protein LCCL domain containing 2	58.6081	17.4387	23.7574	0.371299	0.466581	0.344174	26.9052	26.728	29.4772	12.2041	6.69824	10.7563	70.2522	68.7202	48.3348	5.0987	8.10679	15.076	30.2149	26.512	20.0147	63.9922	33.6608	37.8122	16.4928	3.40208	8.53799	9.07762	4.44309	5.66811	10.2186	4.95927	3.46707	30.2592	37.571	23.9134	1.96305	0.847019	1.60039	17.7503	25.6636	34.3201	40.4168	48.9414	44.7528	135.952
NM_000394	1409	CRYAA	crystallin, alpha A	1.22157	0.754393	1.93183	0.132418	0.313284	0.149932	10.1858	6.56413	9.04847	0.117693	0	0.357205	1.01451	1.01382	1.37797	0.400149	0.357095	0.262	0.304107	0.433554	0.192674	2.21986	0.570065	0.992016	1.02413	0.699796	0.345843	2.06053	2.20365	1.6503	0.469981	0.863683	0.955921	8.3188	42.8891	24.3655	4.92411	0.400311	0.418206	1.43906	1.08863	0.595036	1.55533	1.47085	1.89049	1.39441
NM_001289807	1410	CRYAB	alpha-crystallin B chain	13.2305	10.0098	20.2575	0.002504	1.8087	0.538005	4.67585	0.057664	6.50867	11.2087	13.4144	16.3311	6.39994	6.97226	5.95493	27.5081	23.0119	11.5477	12.8235	8.40991	15.3023	18.4613	6.76224	3.63393	13.448	17.0172	22.7024	14.7209	19.5261	11.2094	4.19225	0.201156	0.00314	10.2949	14.4577	13.7031	25.7426	41.1965	37.4378	0.393135	12.3566	5.89058	1.08132	4.97271	11.8149	2.55197
NM_005208	1411	CRYBA1	crystallin, beta A1	0.173906	0.996165	0.707558	0.138245	0.139969	0	2.30612	0.784439	1.37962	0	0.295129	0	0.25136	0.186877	0.269848	0.312423	0	0.204754	0	0	0.200969	0.315531	0.22213	0	0.319436	0.252578	0.431246	0.320717	0	0.197944	0.613091	0.675852	0	2.45688	14.8806	9.50791	4.7062	0.208042	0.108654	0.4679	0.300322	0.185771	0.269426	0.763904	0.631143	0.207266
NM_001887	1414	CRYBB1	crystallin, beta B1	0.575158	0.300007	0.667843	0.057152	0	0	1.09048	0.176974	0.760616	0.456459	0.244496	0.153872	0.207628	0.540667	0.371787	0	0	0.084725	0.196797	0.070148	0.332476	1.04434	0.552231	0.457689	0.176426	0.139308	0	0.08865	0.086185	0	0	0.186324	0.475211	2.51886	16.7906	9.11851	2.75113	0.086189	0.180068	0	0.414201	0.230752	1.19062	0.351747	0.261563	0.514947
NM_001889	1429	CRYZ	crystallin, zeta (quinone reductase)	10.7868	7.23054	10.1141	1.99227	1.8952	2.12681	4.5928	6.58384	5.69335	4.62957	3.04443	6.46936	14.0923	11.5088	11.7225	0.518277	0.868515	1.8102	7e-06	0.083783	0	13.2932	10.21	11.8035	7.72841	4.408	4.74378	3.27896	4.82883	5.0779	4.45664	5.14898	6.59218	7.33905	4.98053	3.31594	2.60424	2.30629	2.6941	5.8466	8.82266	8.0573	10.3596	10.1655	10.4429	19.4597
NM_006574	10675	CSPG5	chondroitin sulfate proteoglycan 5 (neuroglycan C)	5.10108	13.1162	4.92806	26.888	23.1396	27.184	5.95036	4.29901	3.12517	17.3803	23.1464	14.872	6.27787	7.36259	7.64608	7.53134	6.53605	2.58596	4.61571	6.28213	5.35951	4.48608	6.21648	4.9367	5.65381	4.63604	5.5012	9.82858	10.0499	12.1219	8.94981	8.07583	6.77956	4.09075	5.02664	3.83273	6.03008	10.7995	7.97479	7.36619	7.16975	6.79214	3.62329	2.70327	3.398	0.774536
NM_138455	115908	CTHRC1	collagen triple helix repeat containing 1	1.31877	0.000142	1.41529	1e-05	0.354417	0.175945	9.2724	8.18179	10.3896	0.955184	1.44249	1.10031	2.44271	2.04566	1.91903	0.000156	0.440126	0.965899	1.50999	1.00123	1.29956	0.285995	0.752934	0.000177	0.721299	0.000131	0.000166	1.69372	0.839669	1.0059	1.65379	1.13958	1.48874	1.54639	1.59443	1.47832	0.455978	0.352462	0.368199	0.897285	1.35172	1.30855	0.811504	0.00013	0.829525	1.7838
NM_003793	8722	CTSF	cathepsin F	3.52873	4.59236	2.72286	6.54512	6.52583	6.94916	7.63752	8.50474	9.40039	1.15595	1.03908	1.07529	0.16938	0.189417	0.091189	5.16885	2.50444	1.98037	9.13226	8.87306	8.33937	5.35068	6.13758	4.51959	1.19733	1.0559	1.17678	0.073121	0.071095	0.269884	1.78432	1.44915	0.859138	3.85998	4.12255	3.62996	9.28083	10.0717	13.8582	6.75108	6.62273	4.45509	1.92908	1.68039	2.22643	1.58688
NM_004390	1512	CTSH	cathepsin H	14.333	7.1998	9.16097	1.8662	1.5613	1.81859	17.2087	13.4297	19.7902	6.11926	7.26564	6.10436	15.1947	15.5674	16.2656	14.7609	15.2311	9.92	24.145	18.9792	18.5392	20.5222	16.8975	10.217	6.64686	6.03272	7.04403	15.6845	11.6234	9.24614	9.47222	5.17994	6.44602	25.9422	21.3373	14.0982	4.22987	3.71916	5.23273	7.52817	8.41419	9.98954	12.8875	11.9885	14.7586	57.8135
NM_004887	9547	CXCL14	chemokine (C-X-C motif) ligand 14	9.45287	11.0312	16.9695	2.10367	1.27405	2.33261	31.1272	30.7991	39.6474	5.01584	4.11309	3.9132	24.3962	20.6628	23.3764	24.7623	18.7807	27.8552	54.0846	54.2391	46.2441	25.3162	21.269	11.7851	90.2321	69.166	78.7437	24.4494	20.5007	14.3508	7.74463	4.87496	8.50599	15.3108	12.503	10.086	7.13242	7.37617	7.70437	13.2258	14.3093	11.4272	46.0279	56.0965	51.6287	31.6975
NM_016229	51700	CYB5R2	cytochrome b5 reductase 2	12.5391	6.00204	6.83061	0.350274	0.14538	0.000595	8.59874	8.66749	9.84002	1.63945	3.45093	3.55911	17.0363	17.9214	17.8128	15.74	14.6851	11.6585	10.2652	6.37449	5.83624	10.1183	6.94799	4.43569	3.24625	2.19563	2.66827	6.50983	5.86831	4.65938	3.14794	2.62682	1.50833	10.1652	9.9149	7.8209	1.44215	0.359554	1.77879	6.26054	11.4136	10.763	11.3675	11.2844	12.7686	26.9766
NM_000101	1535	CYBA	cytochrome b-245, alpha polypeptide	27.2678	22.0854	30.1367	1.70315	1.64521	1.57246	25.4443	19.3217	27.6029	11.411	11.7733	7.48097	28.6403	46.158	48.6645	44.9788	36.3863	19.3652	35.2539	27.162	28.3517	46.2696	36.3896	22.8575	15.839	8.67143	13.5026	25.093	22.5352	17.9316	23.2058	13.2438	24.6506	17.409	21.7695	16.536	2.54424	2.67561	6.56129	19.4722	22.4106	23.0702	29.2267	37.2966	31.5197	47.1863
NM_000104	1545	CYP1B1	cytochrome P450, family 1, subfamily B, polypeptide 1	5.47292	3.08014	6.69122	2.29657	1.3032	1.94995	12.1123	15.2999	11.7392	4.26996	3.78694	4.20685	9.20968	7.17257	9.10338	25.0069	18.1902	36.4428	5.37987	3.8979	4.83586	10.2985	11.5642	10.0799	3.87009	1.99056	4.66214	7.0332	9.89428	8.42636	4.64714	5.31802	6.70235	9.20841	17.7588	9.53827	0.773838	0.922774	0.840269	4.68471	4.70149	4.23683	3.52852	4.32024	4.15316	7.21816
[truncated: 712 more rows]
[truncated: 25 more columns]

## Sheet: GO (intra outlier)
Analysis Type:	PANTHER Overrepresentation Test (Released 20181113)
Annotation Version and Release Date:	GO Ontology database Released 2018-12-01
Analyzed List:	upload_1 (Homo sapiens)
Reference List:	Homo sapiens (all genes in database)
[truncated: 54 more rows]

## Sheet: GO (inter outlier)
Analysis Type:	PANTHER Overrepresentation Test (Released 20181113)
[truncated: 244 more rows]
