# Supplementary material for: Data integration of bulk and single-cell transcriptomics from cerebral organoids and post-mortem brains to identify cell types and cell type specific driver genes in autism
Source: Research Square preprint supplement (doi:10.21203/rs.3.rs-113869/v1), 2020-12-02
Supplement: Supplementary file 18 [file 5706a3613f1847ed542be3e8.xlsx]

## Sheet: 16p11.2 GeneScores
Gene				SetA
	Fold Change	P	FDR	GeneScoreall	P(GeneScoreall)	GeneScorec6	P(GeneScorec6)	GeneScorec9	P(GeneScorec9)
YPEL3	0.61	3.2´10-16	3.2´10-12	0.158	0.82	0.616	0.044	0.828	0.02
KCTD13	0.55	1.3´10-11	2.5´10-8	0.274	0.95	0.511	0.06	0.906	0.021
INO80E	0.69	1.3´10-11	2.5´10-8	0.246	0.94	0.465	0.075	0.969	0.027
FAM57B	0.51	2.2´10-8	5.9´10-6	0.363	0.96	0.49	0.135	0.881	0.04
MAZ	0.73	2.1´10-11	3.4´10-8	0.504	0.91	0.677	0.093	1.204	0.049
TAOK2	0.64	3.1´10-9	1.6´10-6	0.249	0.95	0.424	0.224	0.628	0.054
PAGR1	0.62	8.4´10-13	2.8´10-9	0.25	0.97	0.549	0.12	0.923	0.058
ASPHD1	0.71	4.0´10-5	9.3´10-4	0.313	0.93	0.477	0.072	0.579	0.061
PPP4C	0.75	1.2´10-9	8.9´10-7	0.513	0.92	0.632	0.137	1.141	0.064
CORO1A	0.64	1.8´10-5	5.4´10-4	0.161	0.83	0.245	0.408	0.352	0.134
PRRT2	0.51	4.6´10-7	5.1´10-5	0.201	0.83	0.32	0.478	0.413	0.142
SLX1B	1.59	1.7´10-3	1.1´10-2	0.008	0.91	0.082	0.161	0.137	0.15
MAPK3	0.67	2.6´10-9	1.5´10-6	0.166	0.9	0.464	0.153	0.549	0.174
BOLA2B	0.87	1.1´10-3	8.2´10-3	0.094	0.93	0.163	0.308	0.29	0.182
CDIPT	0.68	7.2´10-10	6.0´10-7	0.2	0.91	0.432	0.445	0.555	0.2
KIF22	0.79	7.9´10-4	6.6´10-3	0.372	0.77	0.372	0.235	0.605	0.221
SULT1A4	0.97	0.12	0.23	0.004	0.75	0.028	0.333	0.05	0.268
ALDOA	0.89	2.0´10-8	5.7´10-6	0.22	0.9	0.542	0.314	0.604	0.321
TMEM219	0.77	1.0´10-6	8.7´10-5	0.184	0.97	0.584	0.298	0.516	0.53
SEZ6L2	0.71	7.5´10-3	3.3´10-2	0.196	0.71	0.226	0.803	0.197	0.538

## Sheet: 15q11-13 GeneScores
Gene	Fold Change	P	FDR	GeneScoreall	P(GeneScoreall)	GeneScorec10	P(GeneScorec10)
HERC2	1.48	8.7´10-9	8.7´10-5	0.453	0.39	0.757	0.097
TUBGCP5	1.72	9.4´10-7	2.4´10-3	0.396	0.38	0.546	0.118
NIPA2	1.47	6.6´10-6	9.4´10-3	0.62	0.38	0.921	0.198
CYFIP1	1.35	3.7´10-6	6.2´10-3	0.616	0.39	1.167	0.208
UBE3A	1.38	1.3´10-5	1.5´10-2	0.729	0.38	1.305	0.222
NIPA1	1.38	4.3´10-2	0.36	0.221	0.38	0.204	0.234
OCA2	1.58	1.5´10-2	0.26	0.207	0.38	0.501	0.277
NDN	1	0.85	0.96	0.528	0.38	0.829	0.301
SNURF	0.97	0.19	0.56	0.218	0.38	0.218	0.332
GABRB3	1.18	0.3	0.67	0.479	0.38	0.312	0.334
SNRPN	1.01	0.83	0.95	0.236	0.39	0.223	0.397
