# Supplementary material for: Data integration of bulk and single-cell transcriptomics from cerebral organoids and post-mortem brains to identify cell types and cell type specific driver genes in autism
Source: Research Square preprint supplement (doi:10.21203/rs.3.rs-113869/v1), 2020-12-02
Supplement: Supplementary file 19 [file 80d73516dd605f1595ef1303.xlsx]

## Sheet: 15q11-13 Postmortem brains
		Cerebral organoids		Post-mortem brains		Average
Cluster	Description	CellScore	P(CellScore)	CellScore	P(CellScore)	P(CellScore)
10	Proliferative precursors	0.535	0.017	0.525	0.053	0.03
6	-	0.22	0.078	-0.177	0.97	0.24
3	Dopaminergic neurons	0.096	0.26	-0.234	0.66	0.5
9	Neuroepithelial cells	0.046	0.35	0.302	0.087	0.1
8	-	0.035	0.4	-0.0831	0.67	0.58
4	Cells with forebrain markers	-0.023	0.64	-0.222	0.87	0.85
7	-	-0.039	0.77	-0.0468	0.91	0.84
2	Astroglia	-0.236	0.92	-0.375	0.95	0.94
5	Neural retinal cells	-0.323	0.98	-0.175	0.79	0.91
1	Mesodermal cells	-0.646	1	0.331	0.00053	0.078
