# Supplementary material for: Data integration of bulk and single-cell transcriptomics from cerebral organoids and post-mortem brains to identify cell types and cell type specific driver genes in autism
Source: Research Square preprint supplement (doi:10.21203/rs.3.rs-113869/v1), 2020-12-02
Supplement: Supplementary file 20 [file 9f822bedfcea4c8dd2978234.xlsx]

## Sheet: 16p11.2 SetA
									FPKM in probands and resilient individuals with 16p11.2 deletions																							FPKM in controls without 16p11.2 deletions
Cytogenetic band	AccessionID	EntrezGeneID	Gene	GeneName	FoldChange	log2(FoldChange)	P	FDR	14758.x3_1	14758.x3_2	14758.x3_3	14799.x1_1	14799.x1_2	14799.x1_3	14824.x13_1	14824.x13_2	14824.x13_3	14763.x7_1	14763.x7_2	14763.x7_3	14739.x3_1	14739.x3_2	14765.x2_1	14765.x2_2	14765.x2_3	14710.x6_1	14781.x16_1	14781.x16_2	14781.x16_3	14746.x8_1	14746.x8_2	902_1	902_2	902_3	PGP1_1	PGP1_2	PGP1_3	GM23716_1	GM23716_2	GM23716_3	GM23720_1	GM23720_2	GM23720_3	GM25256_1	GM25256_2	GM25256_3	BYS0110_1	BYS0110_2	BYS0110_3
16p11.2	NM_001145524	83719	YPEL3	yippee-like 3 (Drosophila)	0.614216	-0.703182	3.23242e-16	3.22531e-12	9.18477	8.77798	8.57309	6.65765	6.87622	7.3112	9.01345	9.01162	9.71287	5.6122	5.99174	8.98754	10.3597	6.43939	6.94298	6.52433	7.87721	6.58437	6.28126	5.92566	8.93824	5.47904	5.70832	13.8196	15.8311	18.077	13.3435	10.5813	9.35252	18.8544	18.3895	15.8489	19.1311	14.513	18.8112	15.1037	15.709	16.0675	14.4044	16.4708	18.0531
14q23.2	NR_045406	100750247	HIF1A-AS2	HIF1A antisense RNA 2	0.361384	-1.4684	2.80242e-14	1.39813e-10	0.740751	4.06285	2.54315	1.28082	1.83421	5.19401	1.16993	1.40449	0.977833	11.6346	0.881465	2.40295	2.76196	0.611339	1.13236	2.46169	2.76452	0.890718	1.95352	1.90728	0.646723	1.95877	10.5579	9.9099	7.83458	6.78187	10.5515	11.3924	10.5773	7.5626	7.09596	7.35927	6.39216	7.3432	6.89681	6.95317	9.13615	9.98454	8.77304	8.54222	8.43335
16p11.2	NM_024516	79447	PAGR1	PAXIP1 associated glutamate-rich protein 1	0.621246	-0.686764	8.38175e-13	2.78777e-09	3.42043	4.16332	3.9081	3.376	3.68785	3.64628	3.49405	2.68199	4.73886	4.71755	3.08919	2.78353	2.99976	3.54655	5.08629	4.81218	4.25254	4.19961	3.48076	3.97504	4.16108	1.67102	3.67343	6.40298	6.84766	6.49021	6.41844	7.76283	7.31779	5.42099	5.32704	5.63508	9.00504	8.2317	9.0762	8.52891	5.24301	7.4271	8.26492	8.64316	8.80573
16p11.2	NM_173618	283899	INO80E	INO80 complex subunit E	0.691099	-0.533037	1.26386e-11	2.52216e-08	8.67896	8.60478	8.18862	7.35194	5.30773	4.16822	7.45662	9.72659	10.6248	5.15391	7.36754	5.92022	6.15284	7.61943	8.20782	5.64449	5.59488	6.07868	7.03149	5.24288	6.92672	3.83718	5.76403	13.8862	13.1283	12.6553	11.7249	15.1538	8.52795	12.0742	11.7713	11.1789	11.3962	8.75117	9.30553	12.0332	12.2937	10.8027	10.351	10.5319	13.2257
16p11.2	NM_178863	253980	KCTD13	potassium channel tetramerization domain containing 13	0.545179	-0.875197	1.25906e-11	2.52216e-08	4.04139	2.13113	1.43259	1.29211	1.31221	1.42734	4.46239	2.93424	1.51662	2.19846	1.13375	4.44623	4.52524	2.863	1.41346	0.741475	4.01989	1.37864	1.55731	1.75297	2.94828	2.27259	0.800747	4.07265	4.74708	5.6422	2.64246	2.90596	2.43598	12.1029	10.963	13.7958	2.75456	2.11275	2.63907	5.56053	7.31385	5.70702	4.01639	4.39934	4.79963
16p11.2	NM_001276275	4150	MAZ	MYC-associated zinc finger protein (purine-binding transcription factor)	0.727269	-0.45944	2.06008e-11	3.42592e-08	23.5262	25.3157	24.6203	19.2997	14.9566	14.2271	18.0482	33.0433	23.3651	17.0949	28.4445	18.0621	17.4337	24.9179	20.9448	17.7009	11.6241	23.1821	18.6647	16.7287	24.4857	7.70305	12.2113	43.7782	42.9199	44.0285	27.1789	46.7242	25.2349	32.3901	33.5665	28.6369	30.3516	25.862	28.4574	33.0631	39.7308	26.4731	33.6191	36.2821	41.7859
8q21.3	NM_018710	55529	TMEM55A	transmembrane protein 55A	0.719935	-0.474061	3.07231e-11	4.37935e-08	3.21611	4.55254	5.12916	4.90705	4.58483	4.26827	2.85308	6.47183	3.30157	7.01269	2.35088	4.80541	4.90022	2.89524	4.2332	4.95343	5.49139	5.66592	5.9607	4.86825	4.66113	5.95368	5.81096	5.19742	6.09141	6.42333	6.31693	7.59289	7.393	10.2746	9.64863	9.3174	9.7606	10.1226	11.9339	6.81782	7.89802	8.36668	5.92237	5.39881	5.37402
12q21.1	NM_031435	83591	THAP2	THAP domain containing, apoptosis associated protein 2	0.590518	-0.759947	8.44396e-11	1.00844e-07	1.61612	2.78619	1.53108	1.35307	2.00881	3.55686	1.56021	1.44476	1.02074	4.2628	0.752005	3.04335	2.76808	1.56031	1.60266	2.14864	3.92747	2.0881	2.18837	1.60395	1.61789	3.73839	1.39862	3.04344	2.94154	3.79423	5.05995	3.39602	3.14624	6.41705	6.37893	5.20092	4.17478	4.84835	5.38194	4.58026	6.40565	7.00794	3.08966	2.87137	3.20959
8q21.13	NM_016010	51101	ZC2HC1A	zinc finger, C2HC-type containing 1A	0.626866	-0.67377	9.09594e-11	1.00844e-07	2.43768	3.47181	2.87806	3.3507	3.04657	4.86168	2.60792	3.17744	2.16054	6.24712	1.34346	4.16468	4.91495	1.11649	2.50815	3.01254	4.74002	2.64404	2.93761	2.64749	3.48995	7.35208	2.86126	5.16016	4.61248	4.31686	5.72125	7.77932	5.21371	12.6798	13.1003	12.7674	4.09229	4.15519	4.032	7.4661	10.1391	9.74907	5.58634	5.7743	5.82467
16p12.2	NM_001164579	730094	C16orf52	chromosome 16 open reading frame 52	0.702677	-0.509067	2.29247e-10	2.28743e-07	1.32476	2.93485	2.68123	1.98758	2.31546	2.67974	1.71909	0.932899	1.30117	3.86734	0.937719	2.50296	2.4914	0.86299	1.76822	2.73399	2.80437	2.0521	1.96832	1.45035	1.19606	2.20019	1.94103	3.58477	4.14402	3.80652	3.11503	3.57805	2.88076	6.0641	5.48323	4.83457	2.66038	2.66532	2.90766	3.81532	4.45894	4.2885	3.52369	3.08401	2.85129
12p11.22	NM_020782	57542	KLHL42	kelch-like family member 42	0.748391	-0.418136	3.60713e-10	3.27199e-07	2.49753	5.53432	3.28513	3.18149	3.93118	5.41825	3.60549	2.84312	2.82071	6.19222	2.89724	4.15561	4.85772	1.84953	4.49561	5.67313	5.11404	3.78996	3.33542	3.3397	3.31894	4.47902	4.7314	5.12375	5.73288	4.58282	6.85805	6.9781	5.73222	10.2928	10.1386	9.25921	6.60895	7.22733	7.18827	5.95982	5.19605	6.38019	6.914	6.26766	6.8285
16p11.2	NM_006319	10423	CDIPT	CDP-diacylglycerol--inositol 3-phosphatidyltransferase	0.68241	-0.55129	7.17922e-10	5.96952e-07	12.7794	14.8893	13.1711	14.6447	10.2561	10.637	12.3516	9.64438	15.6484	6.91973	15.391	4.93434	7.10038	9.96585	13.6519	10.8723	7.62115	10.5252	8.31059	12.0838	12.8003	5.46312	14.5629	17.5587	17.4079	17.4056	16.4736	14.0407	14.3548	13.7334	13.4368	16.1912	25.0931	22.7076	29.3546	14.3687	14.6398	15.6819	23.5806	24.8882	26.3902
16p11.2	NM_002720	5531	PPP4C	protein phosphatase 4, catalytic subunit	0.747849	-0.419181	1.15336e-09	8.85249e-07	32.1211	23.8642	25.5434	24.6727	17.2886	14.656	29.127	24.7004	30.981	13.4418	30.8046	13.9947	13.3739	28.5501	29.9647	26.0459	12.5098	30.6302	24.5073	25.8338	19.622	8.44221	26.5966	44.5308	42.5209	39.2432	27.7415	46.7753	29.557	30.4657	29.0612	30.0688	43.5528	33.9226	40.2634	31.898	43.6936	27.6735	37.1918	45.5626	51.917
14q11.2	NM_001166269	54930	HAUS4	HAUS augmin-like complex, subunit 4	1.45682	0.542826	1.57414e-09	1.12191e-06	8.97637	11.4426	17.2284	18.4258	15.1922	9.48672	8.26923	15.8408	16.2463	9.99568	11.3852	7.16577	8.69689	11.321	15.3913	14.8185	8.66873	20.798	17.5092	14.2972	10.4653	14.2938	16.4976	5.98472	7.6772	6.1141	10.3115	12.6298	7.47916	4.11859	3.83604	4.58834	9.91215	10.4589	7.82131	8.6834	7.40828	7.22957	9.34641	12.5858	9.63672
3q25.22	NR_003001	677767	SCARNA7	small Cajal body-specific RNA 7	0.905144	-0.143781	2.13691e-09	1.42148e-06	556.649	439.365	309.101	251.789	386.31	411.899	521.421	442.1	174.092	601.521	206.101	703.53	655.783	694.764	472.209	363.328	441.583	178.366	328.813	221.474	507.771	502.665	636.958	680.016	540.621	801.938	479.413	599.308	489.351	606.59	809.153	768.447	400.951	433.404	419.754	647.372	452.567	613.359	373.457	420.698	408.225
9q21.13	NM_018339	55312	RFK	riboflavin kinase	0.646024	-0.63034	2.41576e-09	1.50653e-06	3.98709	6.02699	5.1313	5.62903	5.42782	7.48242	3.87512	3.21249	2.54608	11.6696	2.01773	10.6547	9.72101	3.80796	4.34517	6.10065	7.43938	4.90841	4.66441	3.95278	3.97483	8.01771	9.30689	13.8768	13.2256	17.1288	7.74348	9.29023	6.32202	20.9998	21.5338	18.901	8.26955	8.47359	9.26184	9.41579	15.0842	10.3394	7.73779	6.52109	6.67684
16p11.2	NM_002746	5595	MAPK3	mitogen-activated protein kinase 3	0.669939	-0.577898	2.58714e-09	1.5185e-06	8.85389	8.1743	10.4451	8.95565	6.58104	4.38596	9.75478	8.33043	9.48971	4.44397	8.18867	5.85776	5.87383	6.26587	10.686	8.2176	5.85876	7.10532	7.4629	6.44533	8.80883	3.59802	7.25764	13.3711	14.9065	13.3042	9.85481	13.0249	9.46204	9.00837	10.3904	9.40623	15.0961	13.1574	16.2695	13.3631	13.6203	10.2938	15.7944	13.8564	17.5724
8q24.13	NM_194291	157378	TMEM65	transmembrane protein 65	0.64086	-0.641918	2.92576e-09	1.62185e-06	3.73213	4.84125	3.41057	2.4785	3.69471	5.07768	2.95836	1.53124	2.04704	6.16483	1.54478	3.38088	2.91372	1.49225	3.32424	3.9631	3.85529	3.13584	2.20322	2.24609	2.04036	2.54232	3.8135	4.84035	4.10222	4.46583	5.88168	5.72094	5.66109	7.31578	8.53513	7.01957	2.48064	3.16227	3.197	6.66363	8.09824	7.51211	7.01285	5.42499	5.69851
16p11.2	NM_004783	9344	TAOK2	TAO kinase 2	0.636367	-0.65207	3.10376e-09	1.62996e-06	6.56137	4.54773	3.44919	2.92194	3.3404	2.90218	6.67729	3.44018	3.68709	4.23832	3.66747	3.55999	4.18988	5.00079	4.25012	3.97484	5.52735	4.4269	2.26122	3.08498	5.00491	2.02356	2.80666	6.56796	6.0798	6.10913	2.61896	7.58626	4.8886	12.7769	13.0198	14.4228	4.64985	3.85693	4.49138	9.88106	10.0066	8.14554	7.59235	7.73598	9.20914
1p32.1	NM_002353	4070	TACSTD2	tumor-associated calcium signal transducer 2	3.35482	1.74623	3.58815e-09	1.79013e-06	0.036631	0.662773	21.4883	14.3855	10.4146	8.33132	0.250184	0.160285	9.9481	0.189793	6.0791	0.114999	0.227638	0.325576	10.3408	10.0919	0.207668	8.5894	13.3195	16.3047	0.465191	0.117408	59.2976	0.694567	1.20472	0.929717	0.171072	0.029887	0.065997	0	0	0.025719	0.505752	0.468544	0.331991	0.060589	0.032503	0.030668	0.2737	0.275482	0.501017
3q27.1	NM_001023587	10057	ABCC5	ATP-binding cassette, sub-family C (CFTR/MRP), member 5	0.689141	-0.537129	4.72003e-09	2.24269e-06	1.50111	2.16731	1.32917	1.3252	2.20112	3.17457	1.68041	2.70789	2.53787	4.90402	1.2802	2.5018	5.06933	1.09418	3.87058	3.44582	3.77191	1.56313	2.38185	2.18599	3.22661	5.06182	2.47452	3.92837	3.94989	4.74727	5.13811	4.0128	3.63313	8.53653	10.7646	8.42698	3.83264	3.71554	4.19118	6.75105	3.03662	4.63161	5.16785	3.82227	3.49771
10q21.1	NM_003338	7321	UBE2D1	ubiquitin-conjugating enzyme E2D 1	0.685093	-0.545628	5.07672e-09	2.30252e-06	5.59856	6.02609	5.55029	4.24169	3.76028	6.2209	4.67501	5.6089	1.68522	10.6225	1.70233	8.22916	6.47753	5.38066	3.61162	4.56437	5.73519	4.05147	4.11515	2.77419	4.63715	6.63616	5.90618	11.8886	9.39449	11.1304	7.34363	8.7721	5.68688	12.761	12.3299	12.8767	5.92324	6.04654	5.82567	8.18186	14.3268	9.55826	5.88801	6.21189	5.10034
Xq22.2	NM_207318	139231	FAM199X	family with sequence similarity 199, X-linked	0.59693	-0.744367	5.3202e-09	2.30804e-06	2.53167	3.69382	2.75509	2.28321	2.76226	4.28932	2.30095	2.31468	1.78541	6.26975	1.0737	4.26419	5.51621	1.15529	3.18781	4.78972	6.58575	2.81682	3.51709	2.8791	2.49999	4.05356	5.40409	8.74826	9.55256	8.27331	4.10278	5.41727	5.80565	12.6675	13.0207	10.7648	4.42514	5.55617	5.17267	5.2946	5.56792	7.09743	4.55002	3.90072	3.90716
21q22.2	NM_004627	7485	WRB	tryptophan rich basic protein	0.714336	-0.485326	6.46514e-09	2.68788e-06	23.3195	21.8428	10.8065	13.3023	11.0394	15.6407	24.7104	18.8376	10.3171	27.8233	9.92108	22.0497	25.4909	25.2788	16.0118	13.0069	20.4823	12.3626	12.8291	9.22219	18.7659	48.141	9.05806	32.8963	27.2988	36.5156	17.3765	26.5044	28.0542	38.7045	35.7982	35.3086	15.3305	16.2966	16.7411	24.4476	38.2843	26.0218	40.0015	32.9141	32.4533
15q11.2	NR_023915	3653	IPW	imprinted in Prader-Willi syndrome (non-protein coding)	0.650485	-0.620413	6.86907e-09	2.74158e-06	0.678042	2.00414	1.57743	0.720329	1.05376	1.78768	0.869153	0.661146	0.917448	2.378	0.468014	1.26919	1.58095	0.615803	1.13616	1.12445	1.85059	1.36123	1.59794	1.23284	0.949646	1.21516	2.01768	2.02443	1.80996	1.47662	1.93271	1.43647	2.56785	2.10498	2.77716	2.47109	1.878	2.18725	1.74066	5.71588	3.03941	5.05816	1.99781	2.3572	2.1011
12p12.1	NM_018638	55500	ETNK1	ethanolamine kinase 1	0.631521	-0.663097	8.5303e-09	3.27367e-06	2.36474	5.2065	4.75118	4.61107	4.3514	6.23578	2.54255	2.91555	1.99968	11.5284	1.78174	5.37577	5.2544	1.97016	4.95385	6.72726	6.25467	5.35492	6.40682	4.58561	2.21819	6.29016	4.98649	6.29718	6.81332	6.49367	10.4108	8.68224	8.98839	9.64666	10.2374	8.63789	6.32107	7.35647	7.57997	8.51146	11.7243	11.7212	7.94311	6.70991	7.30943
6p24.2	NM_001135575	221710	SMIM13	small integral membrane protein 13	0.682339	-0.551439	9.14195e-09	3.37846e-06	2.65846	4.98846	4.20673	4.12902	4.61846	5.71929	3.31541	2.64521	2.54764	8.1575	2.20067	8.39294	8.21685	1.86706	3.29491	5.18394	8.91816	3.36691	3.11214	2.81798	3.26835	6.78219	5.06444	6.82448	8.47947	6.77444	6.57219	6.86391	5.49984	21.0405	19.6305	15.8337	5.65298	7.7637	8.40857	7.14743	10.1302	9.34892	6.9244	5.45469	6.23317
12p13.1	NR_003932	387841	RPL13AP20	ribosomal protein L13a pseudogene 20	1.50627	0.590984	9.86205e-09	3.51441e-06	7.63729	9.76572	17.5817	16.0638	17.291	10.6929	7.8573	28.7245	27.1453	7.12303	17.9943	6.76148	6.07966	12.2358	11.8761	11.867	7.84027	15.0129	14.9807	22.6567	10.7074	8.78872	4.67886	9.6519	6.6525	6.93462	7.46422	7.88748	6.96627	4.31937	3.60373	3.62326	5.19204	5.6224	5.80371	4.62956	6.19116	5.6718	4.97861	5.58532	5.2249
19q13.33	NM_001193646	22809	ATF5	activating transcription factor 5	1.34633	0.429033	1.29895e-08	4.46927e-06	13.6985	77.0727	17.2478	11.7623	28.318	24.4372	21.7771	15.7917	38.1048	27.0486	28.3315	16.0447	19.2849	28.4584	28.5041	22.8614	17.0131	24.3128	17.9212	21.1293	16.6267	6.26518	15.398	9.11835	11.3456	10.8106	17.9116	16.4897	15.9365	6.52485	7.17866	5.96284	14.2074	13.7841	14.8123	11.3324	6.34915	10.4611	23.1972	23.0507	21.6796
13q12.12	NM_000231	6445	SGCG	sarcoglycan, gamma (35kDa dystrophin-associated glycoprotein)	2.02664	1.01909	1.34484e-08	4.47292e-06	0.42165	6.15181	3.2739	2.19511	7.08123	6.64969	2.31873	0.682398	10.5796	1.39749	9.81682	0.734788	1.34619	0.921402	4.91586	4.77219	0.928394	3.61187	2.36339	1.89155	2.8983	4.80684	2.21924	0.444092	1.22567	0.764774	2.29881	1.94897	2.19733	0.464094	0.706476	0.460506	0.785601	1.07906	1.08139	1.27845	1.16351	1.05869	2.87374	2.5074	2.33871
15q21.3	NM_015617	26108	PYGO1	pygopus family PHD finger 1	0.683753	-0.548453	1.51417e-08	4.87366e-06	1.71759	5.40817	4.23652	2.94208	3.67211	5.83626	2.35515	2.2409	2.42008	8.5233	2.14304	4.79823	5.7572	1.60091	3.25323	5.88511	6.23293	3.37354	3.20662	2.62705	2.05593	3.28097	3.84678	6.70308	6.59389	5.66544	6.17424	4.84585	6.10732	8.00926	8.23554	7.02709	5.6239	6.40496	6.18421	5.85986	5.87663	7.44561	6.12441	4.98458	5.12056
9p22.3	NM_178566	340481	ZDHHC21	zinc finger, DHHC-type containing 21	0.67368	-0.569864	1.61805e-08	5.04529e-06	1.2046	1.9017	1.16329	1.05924	1.38744	2.17373	1.48826	1.17212	0.412959	4.40663	0.420823	2.72279	3.32885	0.88984	1.72067	2.40633	3.11771	1.41298	1.29491	1.08435	1.28577	2.46366	1.85983	2.58416	2.54999	2.87744	2.80789	3.12674	2.5117	5.55365	5.34443	4.25634	2.03001	2.66629	2.14192	4.38825	5.18494	5.53548	2.29821	2.14496	2.0342
16q23.2	NM_018455	55839	CENPN	centromere protein N	1.85477	0.891239	1.68384e-08	5.09133e-06	1.12076	2.37468	2.07746	3.57207	2.82002	2.21952	0.631329	6.34455	3.97021	3.97794	2.08522	2.1983	2.85465	1.0763	4.30315	6.59404	2.77205	3.89982	5.25447	6.27547	2.01747	3.89945	2.32864	1.23826	3.27734	2.16939	1.61343	2.12479	2.78613	0.631961	0.567874	0.556699	1.12979	0.761229	1.32825	1.26488	1.70499	0.85327	2.53778	2.71789	1.96491
16p11.2	NM_184041	226	ALDOA	aldolase A, fructose-bisphosphate	0.893413	-0.162601	1.98274e-08	5.65252e-06	213.505	187.964	184.754	171.043	205.198	147.8	237.037	392.576	215.31	149.959	151.309	158.159	174.932	172.164	222.123	195.758	189.802	286.806	234.948	237.145	266.543	135.636	101.104	237.415	273.693	256.435	219.985	431.448	295.1	280.606	277.625	274.332	145.115	127.95	131.06	223.894	241.94	220.165	324.306	346.576	415.228
7p15.3	NM_138771	90693	CCDC126	coiled-coil domain containing 126	0.744579	-0.425504	1.93496e-08	5.65252e-06	2.30123	2.84023	2.89356	3.16075	2.94584	3.45854	2.27554	3.5362	1.60115	4.80091	0.857391	3.32881	3.62283	1.96161	2.68537	2.79117	2.97788	2.82333	2.48238	3.01159	2.2121	4.12379	3.85196	4.75309	4.57172	5.62498	4.21709	4.57115	2.69838	6.27373	5.85724	5.93148	5.25502	5.1306	5.13761	3.83169	5.53617	4.66537	3.39125	2.75661	3.23862
13q33.3	NM_032859	84945	ABHD13	abhydrolase domain containing 13	0.672456	-0.572489	2.21723e-08	5.89249e-06	1.36195	2.78138	2.85899	1.78345	2.10414	2.74703	1.26878	1.95284	1.03255	4.67081	1.0092	2.01339	1.84195	0.7361	2.69519	3.37109	2.65881	1.80497	1.45571	1.25884	0.974556	1.76659	3.93287	4.79374	5.82272	4.80967	3.4828	4.53641	3.62168	3.265	3.41152	2.62023	3.10141	3.28109	3.69873	2.96321	2.77004	3.33189	3.84695	2.9994	3.12877
16p11.2	NM_031478	83723	FAM57B	family with sequence similarity 57, member B	0.514272	-0.959398	2.1811e-08	5.89249e-06	6.56987	2.47726	1.56172	1.65664	1.38717	1.43147	8.73501	9.11408	1.12564	4.25666	1.10106	3.62413	3.15462	4.44806	1.54181	1.45136	10.718	3.70973	3.35027	6.29393	6.44566	3.44616	0.335134	5.5363	5.50597	6.13667	4.09178	5.55483	3.83949	10.645	10.7558	14.4813	6.91153	6.21424	6.85769	8.82483	11.1632	7.96642	4.25591	7.02205	9.42058
1q25.1	NR_002578	60674	GAS5	growth arrest-specific 5 (non-protein coding)	1.09274	0.127949	2.24408e-08	5.89249e-06	152.608	576.114	226.257	320.472	386.542	253.994	225.407	375.876	239.219	174.124	206.186	167.43	219.171	141.131	341.948	401.715	194.355	398.291	344.908	278.297	156.017	368.379	294.404	153.741	213.33	202.212	134.977	200.433	183.799	125.335	116.906	101.444	149.775	154.453	145.057	113.156	159.955	143.96	284.958	254.561	217.882
12p12.1	NM_001001660	144363	LYRM5	LYR motif containing 5	0.620886	-0.687599	2.63385e-08	6.57013e-06	3.16113	7.01117	6.03261	4.3674	5.24962	7.08683	3.42904	1.87727	1.47923	8.78511	1.98195	5.3975	3.84727	2.82113	3.87513	6.24273	4.18981	4.01981	3.21277	1.83588	2.50256	5.64828	5.60668	9.68132	9.18333	8.67542	7.3974	9.66324	8.25424	9.22155	8.26589	6.50661	7.72774	6.85493	6.76029	7.36429	11.0765	7.9309	5.49701	6.07922	5.27329
3q21.1	NM_006810	10954	PDIA5	protein disulfide isomerase family A, member 5	1.44038	0.52645	2.57422e-08	6.57013e-06	5.71999	10.654	18.4224	11.8486	15.293	10.9657	7.14046	4.11224	11.9402	4.43335	7.10357	2.66891	2.70971	3.49222	13.6859	14.6191	2.8756	12.0413	7.9394	7.12029	6.89691	5.65506	16.6285	6.28506	7.26104	6.06507	5.68308	8.13699	8.19703	2.94607	2.94069	2.5079	5.75657	5.30364	4.99308	5.81926	6.13277	4.31158	5.48508	5.88204	5.16764
11p14	NM_018362	55327	LIN7C	lin-7 homolog C (C. elegans)	0.687862	-0.539809	2.77764e-08	6.66689e-06	4.14937	9.11194	7.84143	7.93993	7.49322	11.6915	5.17889	7.29632	5.54673	20.8384	3.51962	14.4581	16.3125	2.34397	7.597	10.8285	15.2243	7.32714	7.82526	6.25232	6.57486	12.6445	11.0976	17.396	16.2877	15.0975	14.1664	15.8035	13.5586	25.0226	24.8657	23.2343	11.374	13.6112	14.5075	12.6561	14.1851	16.9436	16.1764	14.3824	14.8558
11p15.4	NM_001190702	100463486	MTRNR2L8	MT-RNR2-like 8	0.841231	-0.249427	2.80627e-08	6.66689e-06	714.521	339.441	1242.93	1501.2	1001.19	886.185	581.187	961.393	552.378	980.655	730.866	1405.66	1204.5	1085.2	710.689	532.577	1059.78	585.469	685.36	706.675	1076.42	1314.3	954.821	1395.5	1147.87	1373.33	796.953	1534.04	1171.36	1333.31	1324.98	1199.9	1046.63	1033.99	1063.29	814.7	1740.28	1352.45	1045.31	1064.78	1121
14q23.1	NM_012460	26520	TIMM9	translocase of inner mitochondrial membrane 9 homolog (yeast)	1.12022	0.163779	2.93926e-08	6.82045e-06	6.94386	17.3254	18.2673	21.6692	18.7385	15.5281	9.88339	14.9451	11.8434	13.2092	11.6474	10.5858	10.7769	6.71561	17.3144	18.5015	12.41	21.7206	21.7429	17.1612	9.90381	16.0408	17.7097	13.1736	15.1726	12.8194	9.70467	12.5013	14.228	9.1344	8.4924	8.41067	14.1575	12.0224	13.7967	8.32583	11.8299	10.4003	13.8589	13.0458	12.4981
11p15.4	NM_015012	440026	TMEM41B	transmembrane protein 41B	0.710065	-0.493978	3.40159e-08	7.54246e-06	4.41016	8.94986	8.15124	6.86117	5.76763	7.90022	4.16049	4.08115	4.55926	10.546	3.96126	6.23296	5.46935	3.3327	5.96695	7.92094	5.25203	6.37627	4.73931	3.81105	2.7305	4.5122	11.4097	11.3989	10.5559	11.6981	8.47521	11.6752	7.22179	7.85938	8.3014	7.46429	8.41997	8.67741	9.49726	8.07959	9.54121	8.83306	9.05985	8.37144	8.47798
8p22	NM_016353	51201	ZDHHC2	zinc finger, DHHC-type containing 2	0.636865	-0.65094	3.37747e-08	7.54246e-06	2.4726	3.8377	3.88569	2.70007	2.52327	3.7477	2.51672	2.57868	1.27373	9.03477	1.0891	6.55478	6.17465	2.50782	3.18927	4.75381	6.21621	3.83181	2.92365	1.72354	2.16752	3.72718	5.3855	7.79727	7.60983	8.34839	5.62588	5.89177	5.52364	7.23624	7.37413	6.43381	7.15171	7.43672	7.52769	6.03086	7.65249	6.8535	3.82297	3.70186	3.76896
8p22	NM_181723	286097	MICU3	mitochondrial calcium uptake family, member 3	0.704518	-0.505292	3.59272e-08	7.67932e-06	1.17118	1.54926	1.24769	1.17086	1.58102	1.97667	1.31349	2.00682	0.41579	3.81968	0.436127	3.68235	3.81147	0.895679	1.53039	1.64725	4.1076	0.955019	1.21412	1.35175	1.42535	3.39984	1.34557	2.66106	2.72188	2.58553	2.48987	3.10703	2.07259	6.93296	6.99721	5.89764	2.11082	2.09355	2.98256	3.17894	4.87496	5.18135	2.38794	2.07683	1.8821
3p25.1	NR_046084	100505696	SH3BP5-AS1	SH3BP5 antisense RNA 1	0.789597	-0.340812	3.61724e-08	7.67932e-06	1.87526	2.7577	2.22298	1.12402	2.21231	3.08613	2.74132	1.09759	1.78966	3.99647	1.81674	2.60356	4.40294	1.176	2.82323	3.6861	4.0081	2.18154	1.90629	1.99259	2.98206	2.96149	4.0603	3.02565	3.95836	3.34916	3.21158	3.27305	3.88027	7.76263	7.24211	7.2101	3.58246	3.69407	3.60791	4.2689	3.34263	4.29628	4.31773	3.47373	2.69041
20q13.12	NM_006103	10406	WFDC2	WAP four-disulfide core domain 2	2.29993	1.20159	4.20117e-08	8.73318e-06	8.63002	9.69325	9.09081	8.90841	6.07695	4.91803	21.3754	8.15784	8.53905	4.88707	8.24325	4.28692	5.21058	10.0976	5.59858	6.86456	4.80858	14.3657	19.0868	23.6372	17.3616	10.2807	30.8096	4.53493	4.51653	2.20411	2.57391	3.78921	5.84807	3.55379	3.15488	2.54413	3.07136	1.33117	1.71847	1.56744	0.609243	1.00725	7.33308	6.55604	9.25496
Xq22.2	NM_206917	27018	NGFRAP1	nerve growth factor receptor (TNFRSF16) associated protein 1	0.9074	-0.140189	4.44304e-08	9.04749e-06	228.154	152.61	137.593	139.36	80.8619	76.19	135.606	81.5649	106.489	97.5583	91.7803	95.7731	108.596	125.714	126.934	128.395	95.1278	109.196	90.722	72.8756	120.82	210.152	80.408	197.1	206.972	189.934	104.303	110.733	100.486	129.444	118.827	118.517	106.135	96.1629	105.608	103.86	130.828	98.639	115.012	123.297	131.273
5q23.1	NM_002317	4015	LOX	lysyl oxidase	1.7129	0.776437	4.76639e-08	9.51181e-06	3.23314	11.5983	9.5792	10.2105	9.30085	8.69447	6.48547	1.10279	4.71213	1.26589	4.73187	1.67975	1.60524	1.3757	7.14042	8.4204	2.03653	9.13734	4.21102	3.42363	2.37547	3.79505	4.14727	3.11596	3.43776	4.0176	1.86736	4.07992	3.12267	1.02515	1.03514	1.46994	2.63002	2.95475	2.19934	2.03305	2.77215	1.60564	4.4252	4.04582	4.01473
Xq22.2	NM_001006639	9338	TCEAL1	transcription elongation factor A (SII)-like 1	0.595526	-0.747763	5.02091e-08	9.82325e-06	7.7129	6.14463	2.37987	2.26859	4.91537	5.63631	4.09526	4.00032	3.50376	5.66117	2.04754	3.53556	3.95522	4.37712	3.64113	3.5778	5.01547	2.0654	1.05179	0.80621	9.58964	16.4705	3.52924	11.4924	11.6536	14.39	3.82219	4.59703	4.62332	18.793	17.0062	19.2	4.73096	4.94929	5.51825	7.10842	9.08662	10.1631	6.63997	7.33646	3.62795
4q35.1	NM_001151	291	SLC25A4	solute carrier family 25 (mitochondrial carrier; adenine nucleotide translocator), member 4	0.773922	-0.369739	5.63505e-08	1.08128e-05	8.84444	7.01327	5.36853	4.3238	6.96708	7.9179	10.8735	5.24154	5.20031	8.4757	3.83377	8.97787	12.5086	9.05066	6.17041	6.0071	9.87367	6.12203	5.15881	3.68503	10.0099	12.8744	5.11077	11.2776	12.398	12.8483	6.93961	8.10559	6.48569	18.2051	17.99	16.9218	8.20064	7.35437	8.28095	9.38356	11.2414	9.43383	8.0398	8.38086	9.31132
3q25.1	NM_016275	51714	SELT	selenoprotein T	0.85348	-0.22857	5.90286e-08	1.1113e-05	15.542	17.881	16.8975	16.7426	15.1691	16.8642	12.47	20.1963	9.63098	19.2373	9.64321	15.668	15.7061	13.3927	19.4093	21.6594	13.8186	15.679	16.3845	12.0326	11.1636	27.1852	19.3009	25.8499	25.0567	26.213	16.992	21.1228	16.5562	26.2084	23.6379	22.9621	19.4702	19.3443	21.6255	16.0571	26.3107	21.8615	18.2125	18.7473	17.2738
5q31	NM_018926	56100	PCDHGB6	protocadherin gamma subfamily B, 6	0.543456	-0.879764	6.62211e-08	1.19232e-05	10.0757	7.21665	4.86449	3.03643	4.11728	5.9491	17.7874	1.49424	8.58952	7.79513	6.71465	3.48819	7.94235	2.53707	10.1503	10.4471	8.14753	10.2665	2.23703	2.02316	13.4074	3.2741	1.85573	7.54192	8.3892	7.79347	8.66567	11.7861	8.9452	27.5064	27.7344	30.7322	6.57316	5.84404	6.65884	22.011	16.7153	17.6176	8.79581	10.9999	13.3453
6q15	NM_006813	10957	PNRC1	proline-rich nuclear receptor coactivator 1	1.07415	0.103201	6.6917e-08	1.19232e-05	54.5959	62.9765	78.6875	56.9539	59.6189	56.4566	45.9917	40.4435	43.058	46.8482	29.9148	36.4451	36.2896	29.5023	58.2477	58.4116	47.5346	72.182	56.8962	58.5157	36.293	38.0571	44.3545	38.479	34.8381	34.9429	42.6168	45.0675	48.3126	20.381	19.3097	20.0137	34.6923	29.853	37.3472	32.9691	43.8162	39.9145	48.5321	44.6979	46.1212
19q13.32	NM_005628	6510	SLC1A5	solute carrier family 1 (neutral amino acid transporter), member 5	1.31268	0.39252	6.66207e-08	1.19232e-05	22.1396	53.5439	49.1785	37.8449	53.0576	39.911	28.619	19.6156	68.3975	19.5618	57.286	7.68993	9.73109	21.3659	45.5638	38.4025	12.3862	44.4953	34.7694	38.0766	17.9959	7.22513	54.7069	17.3779	18.1568	14.2697	23.0843	14.7016	15.1534	5.05838	4.02825	5.57661	16.7896	13.6749	20.9517	12.5747	9.67499	11.1238	23.5165	32.6365	30.9863
2p21	NM_020744	57504	MTA3	metastasis associated 1 family, member 3	1.4401	0.526173	6.81497e-08	1.19298e-05	2.13457	4.44647	9.5857	9.7836	8.3379	9.04003	2.29588	10.3218	7.29212	6.96784	5.19001	3.15753	3.11941	1.79466	9.03274	10.6392	2.44394	15.1614	21.2421	15.5895	4.23686	4.89309	11.976	3.59707	4.64302	2.68276	8.15302	6.02117	7.45676	1.41584	1.60689	1.56976	9.19751	8.80693	9.30838	2.95794	1.88453	3.62928	6.10148	4.91848	5.24668
12p13.33	NM_003324	7289	TULP3	tubby like protein 3	1.19309	0.254708	7.16991e-08	1.23347e-05	4.42244	9.23585	11.2752	6.08405	11.3548	10.6524	6.82317	7.94203	12.7682	11.0375	7.43881	5.19362	8.35661	4.09129	13.0168	12.8045	5.82744	9.49131	9.35088	7.21838	7.17633	5.15106	10.3133	6.43727	8.6052	6.2779	11.9071	10.8804	10.4001	5.14791	5.06053	4.44734	7.61773	6.9093	8.61374	5.27991	4.72174	5.20115	9.43614	8.45833	8.15923
12q24.23	NM_207311	92558	CCDC64	coiled-coil domain containing 64	0.764951	-0.386561	8.561e-08	1.44782e-05	4.89113	2.16636	4.02086	3.0386	1.80581	1.81215	4.19874	3.57314	2.44845	4.65137	2.73236	5.24933	4.82537	4.4485	3.39815	2.72378	5.58206	2.26083	2.29032	2.24056	5.86681	3.30307	4.18249	4.49666	5.07158	5.34331	2.74121	3.85009	3.64469	8.19731	8.85286	9.39359	4.86983	4.88931	4.54062	4.56137	3.1077	3.93588	4.88382	4.62373	5.31931
18p11.32	NM_001071	7298	TYMS	thymidylate synthetase	1.36745	0.451488	8.99101e-08	1.49521e-05	3.74079	6.29745	6.81272	8.96365	7.52768	6.54296	4.03166	10.8222	7.12849	11.4618	6.10484	2.67565	3.05779	5.1516	10.2782	7.33618	6.5934	15.0771	13.515	13.6028	3.66895	5.6029	5.18212	4.45812	5.84984	2.90176	7.51487	9.47459	8.52623	2.74304	2.25775	2.24625	6.8459	7.02308	6.8987	4.63982	3.66683	3.62492	4.05118	6.25754	6.18335
16q23.3	NM_001537	3281	HSBP1	heat shock factor binding protein 1	0.868701	-0.203068	1.07611e-07	1.76024e-05	44.1138	48.2045	55.9337	64.3651	55.7248	65.1928	44.2619	67.1765	38.9124	72.1106	31.9681	52.6082	59.5196	32.1111	71.3734	80.708	49.4867	54.29	66.213	45.1545	63.8197	139.621	42.4993	61.474	69.3242	58.5623	70.4685	84.51	75.0445	100.825	92.5877	77.9965	71.6041	69.7286	73.5196	48.5481	77.8398	68.7322	86.2532	75.6215	82.178
20q13.13	NR_003604	441951	ZFAS1	ZNFX1 antisense RNA 1	1.16037	0.214589	1.09721e-07	1.7658e-05	19.9425	117.822	68.9588	88.0928	94.8462	68.49	33.4297	214.519	66.8216	47.6486	50.0144	41.6873	50.5528	27.5024	98.8196	107.44	50.8841	87.4136	139.209	105.54	35.9774	93.764	68.4085	50.8633	63.0444	57.5646	47.5675	63.256	50.4125	38.9559	32.1268	24.2234	41.8363	38.2511	41.4103	27.2917	44.9313	42.9695	66.6459	61.7503	57.2776
7p22.1	NM_001033519	26100	WIPI2	WD repeat domain, phosphoinositide interacting 2	0.752339	-0.410545	1.25354e-07	1.98538e-05	3.44472	1.54283	2.694	2.13267	3.13233	2.49764	3.79139	2.21603	3.35447	4.0585	2.11465	3.42092	4.2102	3.58164	4.35942	3.63829	2.62638	3.06596	2.00385	2.06584	1.77001	3.07616	5.30952	3.45541	4.56643	5.04863	4.68385	4.2407	2.08733	5.87102	6.20506	5.20236	6.93354	5.66508	5.94238	5.22031	4.26008	4.89487	3.87424	3.3344	4.66978
10q25.3	NM_139169	142940	TRUB1	TruB pseudouridine (psi) synthase family member 1	0.768607	-0.379682	1.37718e-07	2.14711e-05	3.63951	5.66591	5.80015	5.75032	6.3711	7.77163	2.87023	7.11343	4.07476	9.30004	3.30063	5.59594	6.54352	2.24452	5.90743	7.68541	4.93387	4.99134	6.56055	5.19288	4.62029	10.1761	7.98731	9.50777	9.70619	7.52992	8.49075	11.0915	8.90803	10.8763	10.4258	10.2066	7.47389	8.82375	9.76925	7.00084	8.48964	8.15332	9.55812	7.92715	8.8444
12q21.1	NM_139207	4673	NAP1L1	nucleosome assembly protein 1-like 1	1.12687	0.172319	1.54409e-07	2.37029e-05	18.244	47.3662	55.2836	67.4206	62.0073	56.565	25.7119	126.268	56.9716	80.7826	43.8511	37.2485	52.6384	23.9883	89.2478	88.9174	55.8518	96.1836	116.813	99.343	31.2117	51.4136	37.4389	56.2799	49.5632	34.8606	75.0277	59.133	76.8224	20.1729	18.0614	18.4764	52.527	60.7993	57.2277	22.1449	18.7688	29.01	62.6954	56.0368	57.9645
1p36.13	NM_153213	128272	ARHGEF19	Rho guanine nucleotide exchange factor (GEF) 19	2.00924	1.00665	1.81291e-07	2.74078e-05	3.71043	6.03816	4.18945	4.35392	3.25091	2.56975	4.25391	1.81885	9.09335	0.836681	9.58697	0.869406	1.23294	2.17144	4.48017	3.61037	1.03956	4.79934	3.59361	3.87162	2.83134	1.44687	4.74586	2.10903	2.08	1.4817	1.44295	2.39075	1.91037	0.73953	0.659146	0.736999	1.56446	1.40446	1.40701	1.11053	0.866844	0.633788	2.38611	2.69011	2.88456
1p35.3	NR_024127	85028	SNHG12	small nucleolar RNA host gene 12 (non-protein coding)	1.53142	0.614868	2.02478e-07	3.01541e-05	2.42009	8.69262	5.32115	6.90477	5.60452	5.29865	5.04171	23.7325	4.25863	6.41341	2.32046	4.52718	5.81508	5.1941	6.14532	9.61518	5.20296	9.63269	11.7066	12.6752	5.53612	9.33435	10.2461	5.98232	3.7993	3.41345	3.97625	4.03918	4.51482	4.28979	4.49406	5.18159	3.22686	4.03648	3.70484	2.59907	2.56808	3.33434	5.11118	4.37512	3.03629
9q22.33	NM_018946	54187	NANS	N-acetylneuraminic acid synthase	1.13145	0.178171	2.14099e-07	3.14159e-05	11.5446	19.8576	31.3117	16.007	28.191	23.9739	13.9347	14.8898	25.0453	14.5415	15.6117	11.7822	15.6571	8.79468	23.3064	27.2699	13.5249	22.4344	20.0275	18.2584	16.7471	18.6226	23.7902	17.3452	25.1129	20.1912	20.0761	20.7286	21.222	10.8939	10.6	10.1997	12.6069	12.6641	13.8603	10.4557	10.1746	8.57174	18.2786	15.9668	16.2089
5q22.1	NR_015370	114915	EPB41L4A-AS1	EPB41L4A antisense RNA 1	1.18684	0.247124	2.19737e-07	3.17759e-05	9.21309	19.4408	20.8243	24.7564	27.238	17.8652	14.5528	47.8198	18.1483	17.8363	11.2599	19.0211	19.2445	9.14133	30.2018	32.845	21.4213	34.3282	27.5798	25.6595	16.7376	25.5391	14.9982	17.0463	17.8753	16.6649	11.4639	18.1701	17.0287	14.8663	14.6923	13.5072	14.3049	14.2267	15.9887	9.35245	13.6879	16.3183	26.8695	22.6667	21.4676
17q25.1	NM_001242534	79157	MFSD11	major facilitator superfamily domain containing 11	1.30329	0.382161	2.49949e-07	3.56285e-05	4.04028	5.70088	7.88708	7.53188	6.0437	4.29437	3.13664	4.09707	6.30083	4.16728	4.9063	3.31967	2.89414	2.87967	6.3313	6.42183	3.86052	5.86837	4.59461	4.4621	3.53905	4.24491	6.47476	3.54122	4.80502	3.77362	4.14472	4.53882	3.77197	3.1041	2.98177	3.50117	3.75372	2.79381	3.30508	3.55058	3.35169	2.74011	4.11703	4.49846	4.20078
Xp11.3	NM_003334	7317	UBA1	ubiquitin-like modifier activating enzyme 1	0.819647	-0.286925	2.5878e-07	3.63678e-05	113.491	34.2886	29.5881	22.9162	25.3953	26.0874	40.2324	23.6319	30.1943	48.0424	21.6938	29.5782	37.9185	35.7953	39.9314	38.5313	29.1523	38.4579	32.0197	31.4196	52.9219	19.3452	30.1193	50.51	61.6343	70.0281	22.0111	37.7218	25.4635	78.2162	77.2646	93.7056	54.12	47.8067	49.4813	39.5916	49.1906	31.3108	42.0784	40.0707	51.3867
5q33.3	NM_001037333	26999	CYFIP2	cytoplasmic FMR1 interacting protein 2	0.771648	-0.373986	2.66933e-07	3.69924e-05	10.7711	9.76655	8.97091	5.59957	9.56621	11.7924	16.9428	8.16553	7.90895	16.0249	5.06173	16.0813	25.5861	8.63475	10.1451	11.6002	24.8755	10.7076	7.43823	7.84645	13.9476	9.06009	9.11174	13.1476	16.7446	16.4664	10.6742	10.4402	9.79265	24.4245	25.4763	26.3631	14.827	13.9058	16.0083	17.7704	15.9004	14.9122	15.185	15.694	16.2414
8q21.11	NM_014393	27067	STAU2	staufen double-stranded RNA binding protein 2	0.592285	-0.755636	2.77789e-07	3.79696e-05	2.9854	1.65017	3.13068	3.01879	2.2569	3.50731	1.54965	3.93345	0.228005	10.1339	1.12323	6.69377	6.08647	1.6221	3.98528	2.98863	5.65341	3.68861	4.02384	3.36513	1.45001	5.81558	3.20879	7.99763	8.41376	8.92769	6.86352	7.5628	4.65357	7.16144	7.33916	8.08707	5.46372	6.27074	4.87715	5.5807	7.74426	6.96438	5.63346	5.30409	3.09471
16p13.13	NM_001424	2013	EMP2	epithelial membrane protein 2	1.3456	0.428251	2.87298e-07	3.87387e-05	3.86352	6.98749	17.2601	11.1631	10.5751	9.61124	6.61591	3.43117	12.2653	3.63227	9.20265	2.16422	3.53415	2.30193	14.1847	14.8556	2.91045	9.70702	9.15898	8.71424	4.70178	2.97064	17.2388	7.41041	8.02718	5.11574	6.22295	4.99925	5.09439	1.56272	1.32867	1.09141	6.04986	5.57062	6.56384	3.8198	3.00606	3.14339	9.47183	8.58695	7.47284
Xq26.3	NM_003413	7547	ZIC3	Zic family member 3	0.4977	-1.00665	2.97101e-07	3.95263e-05	6.54183	6.10853	3.19519	3.36132	2.04391	2.88585	4.60804	2.76386	0.736838	4.79048	0.680394	1.32071	2.00194	2.02612	4.36595	4.07117	2.29922	6.54674	6.39765	6.75302	8.01253	8.31082	0.759211	4.25708	4.77877	4.21294	6.39749	13.5994	6.74671	18.5665	18.0004	18.1259	4.78686	5.24711	5.62908	12.1414	12.77	13.8785	9.09295	8.90786	9.0686
14q22.3	NM_014750	9787	DLGAP5	discs, large (Drosophila) homolog-associated protein 5	1.62839	0.703449	3.14557e-07	4.05249e-05	1.90009	3.80613	5.77997	5.83379	5.57607	7.14081	1.04225	10.6565	5.05688	9.90165	3.39126	3.17565	4.25908	2.79434	9.74486	8.15615	3.38551	10.0946	17.8886	9.03545	3.45723	6.85642	2.79435	1.6059	2.96773	1.57148	8.70053	10.6887	8.69383	1.80956	1.25998	1.2777	4.83237	3.75169	4.81469	2.62154	1.8179	2.34616	4.68754	4.22266	5.51962
10p12.31	NM_022365	64215	DNAJC1	DnaJ (Hsp40) homolog, subfamily C, member 1	1.2453	0.316489	3.113e-07	4.05249e-05	5.07783	13.6167	17.1267	17.561	18.2631	17.7708	6.71956	11.8508	13.8187	12.0502	11.0823	8.1607	10.6783	4.26002	22.2896	22.2402	8.70516	17.2283	18.5622	16.5014	8.40642	12.1482	33.4574	9.5901	10.4917	7.66031	16.9667	12.1628	14.8333	5.82721	4.64773	4.38011	16.597	17.606	19.6633	5.27937	4.37702	8.10778	17.3437	12.6987	12.2851
5q14.1	NM_004866	9522	SCAMP1	secretory carrier membrane protein 1	0.65195	-0.617166	3.16791e-07	4.05249e-05	3.85993	8.06053	5.96172	5.9374	6.84751	9.63902	5.89167	5.92861	2.98406	19.4938	2.25045	18.0061	18.3699	2.37914	5.78941	8.10865	16.0854	4.98741	4.74463	3.95151	6.69534	14.3811	7.1161	12.4894	13.5092	13.3389	10.5267	12.2574	12.1857	38.6158	38.4121	29.3663	8.29297	10.0803	10.2137	12.5927	18.3264	19.4881	12.2575	10.3009	10.4915
7q11.21	NM_000181	2990	GUSB	glucuronidase, beta	1.39724	0.482579	3.2895e-07	4.15477e-05	6.45979	5.88257	13.4689	9.09727	8.75007	7.3068	6.91864	4.93688	10.1987	3.92398	6.33001	3.90901	4.36085	3.75513	10.5587	8.501	3.19718	12.9488	6.55427	6.4506	5.6176	3.90039	12.6543	4.48877	5.21085	5.08141	4.7258	5.86864	5.72115	2.96114	2.36285	2.68397	5.66604	5.62381	5.96833	4.46198	4.48338	3.84923	5.78456	5.73515	6.02423
19q13.2	NM_024907	115290	FBXO17	F-box protein 17	1.53833	0.621363	3.43443e-07	4.2836e-05	8.91138	20.9507	11.0655	9.57692	11.6135	9.40244	10.6429	4.76526	12.6896	4.73159	12.2594	2.85264	2.65669	5.13853	7.60947	10.5445	4.34037	11.8139	9.32816	9.31894	6.60525	2.47737	8.40261	3.88587	3.36646	3.6454	4.32009	5.27018	6.09937	0.751489	6.7e-05	1.01541	6.36295	4.78529	6.26323	3.67306	1.64091	2.58388	7.12451	8.61478	11.0013
3q26.2	NR_001566	7012	TERC	telomerase RNA component	1.2849	0.36166	3.55253e-07	4.37619e-05	226.881	69.4813	129.954	166.855	80.4729	62.7518	93.0686	219.828	111.398	80.256	117.203	54.7758	29.7738	289.493	72.7958	76.4687	68.9689	144.524	141.715	197.358	132.204	180.288	96.1818	39.4418	47.8155	48.265	53.719	53.7637	71.1604	19.917	14.9008	25.0126	114.908	89.3851	114.509	17.6808	20.9833	19.2351	50.8167	63.1331	68.423
19q13.31	NM_014297	23474	ETHE1	ethylmalonic encephalopathy 1	1.37215	0.456437	3.82007e-07	4.5377e-05	13.6964	15.863	20.5707	26.8405	22.5093	15.7073	13.1509	23.6327	25.2269	6.99236	24.1506	8.54586	10.4224	14.3506	23.3798	19.0971	7.04308	17.5845	17.5259	17.7748	14.7628	8.68261	26.4343	14.1399	13.3034	12.127	8.71846	8.53035	6.4044	3.84432	3.95053	3.67467	10.5917	9.50217	8.86389	7.57056	9.57895	7.0734	6.94859	11.122	10.7777
1q32.2	NM_015714	50486	G0S2	G0/G1switch 2	1.6664	0.736739	3.78811e-07	4.5377e-05	2.5299	11.8973	46.6383	31.3224	14.9532	9.92449	6.38971	6.44529	12.2066	1.64861	12.1871	0.545481	0.541423	3.75323	12.6881	11.8889	0.491378	14.1024	6.3288	3.91468	2.48347	1.96059	4.14475	2.38726	3.32585	4.59716	3.54188	5.90015	3.63706	0.595599	0.329211	0.489956	2.75556	3.52139	2.8105	1.08151	2.31749	2.11473	3.93316	3.43903	4.71965
3q21.1-q21.2	NM_001024660	8997	KALRN	kalirin, RhoGEF kinase	0.737731	-0.438834	3.78978e-07	4.5377e-05	2.24809	1.9614	0.9605	0.777899	1.50444	2.79323	3.65206	1.21667	1.72299	3.59133	0.642073	1.07518	3.25756	1.16966	2.00958	2.2625	3.78607	2.53629	2.22176	1.6385	3.31297	1.95252	1.68131	1.67412	2.42358	2.16169	3.18943	3.86248	2.72305	5.77626	6.20224	5.99696	2.43375	2.54867	2.04671	6.36817	3.44429	3.78079	3.00742	2.63129	3.37645
14q32.31	NM_178587	5527	PPP2R5C	protein phosphatase 2, regulatory subunit B', gamma	1.19716	0.259618	3.92547e-07	4.60805e-05	6.78847	12.4128	18.2895	19.1596	17.588	17.7463	7.56401	34.1867	11.2155	18.5998	10.7878	15.1202	18.012	5.48989	17.6558	22.1536	16.9163	20.8608	24.4649	17.4326	14.9739	22.5667	19.7784	13.5872	12.9501	11.2378	16.8116	17.5102	16.955	10.8011	8.37147	8.96385	14.593	13.1882	16.1778	7.58636	8.79606	11.9286	12.0098	10.0996	11.4718
14q24.3	NM_001107	97	ACYP1	acylphosphatase 1, erythrocyte (common) type	0.710952	-0.492176	4.49883e-07	5.11138e-05	10.0303	11.1478	5.29967	6.211	8.18379	9.7078	13.1328	20.8596	5.50339	14.0337	3.66473	17.8118	16.5585	14.8653	7.43252	5.98322	14.4332	5.5003	6.92918	4.83225	14.4902	21.1675	3.83142	11.1657	12.1402	13.7272	14.4032	15.2436	13.4284	22.1662	22.9603	17.0127	12.9432	9.84629	11.3015	14.3502	19.994	17.9987	12.2978	12.4282	17.0787
10q25.3	NM_025015	259217	HSPA12A	heat shock 70kDa protein 12A	0.76965	-0.377725	4.54614e-07	5.11138e-05	2.59375	2.37221	1.75955	2.30699	1.88758	2.55111	3.68051	2.50576	1.55153	2.36612	1.30629	1.70308	2.77944	0.7286	2.08075	2.23953	3.01924	2.1113	2.43685	2.01768	3.66419	2.78237	0.581696	1.73823	1.91981	1.8013	3.45446	3.14546	3.65315	10.2372	10.8605	10.0077	4.85306	4.51359	4.27923	3.19779	2.66162	3.46015	2.58962	2.45761	2.64958
16p11.2	NM_145239	112476	PRRT2	proline-rich transmembrane protein 2	0.511232	-0.967949	4.55916e-07	5.11138e-05	4.90792	2.41294	1.22661	1.07104	1.91038	3.08135	6.0269	4.20967	0.822594	5.97481	0.605188	7.56121	8.51691	5.66554	4.98911	3.83575	8.73865	2.51653	3.00078	1.2321	8.54792	2.73481	0.016518	6.64973	6.67304	8.73253	4.90705	3.23108	4.14896	14.8036	13.2609	15.4051	6.65693	3.1169	3.11091	13.3157	10.7564	10.3483	7.02226	6.73914	7.64195
1p21.3	NM_015976	51375	SNX7	sorting nexin 7	1.30146	0.380135	4.46846e-07	5.11138e-05	2.16573	8.50281	8.09189	9.58972	8.99803	8.75275	3.06801	4.4719	9.988	6.25529	7.86196	4.76036	5.51134	2.25387	8.28723	10.7785	5.54442	7.11111	6.24003	4.95892	2.13577	5.53703	7.37711	3.22121	3.45178	3.39429	7.14694	7.54645	6.77391	2.05403	2.25864	1.50497	5.37413	5.07186	5.90625	2.76884	4.06667	4.42575	6.67292	5.85633	7.66509
14q22.1	NM_001099652	283554	GPR137C	G protein-coupled receptor 137C	0.590423	-0.76018	4.642e-07	5.14644e-05	1.23985	1.59048	0.603425	0.694681	1.27761	2.60401	1.34834	1.92265	0.248959	3.79995	0.350895	3.03187	3.10968	0.919436	1.05372	1.228	3.91398	0.923784	1.52091	1.50313	2.0305	4.66362	0.21707	1.60339	2.17636	1.59936	2.89201	3.7262	2.22908	7.44239	7.41903	6.64782	1.64833	1.86103	1.80927	4.77069	5.82171	7.04987	3.278	3.60569	3.53222
11q12.3	NR_003098	23642	SNHG1	small nucleolar RNA host gene 1 (non-protein coding)	1.17447	0.232013	4.75034e-07	5.20867e-05	21.5701	32.4463	46.8964	60.8552	56.8256	43.2719	20.3773	115.253	32.7012	54.5346	24.0157	44.4377	47.581	35.1462	70.5777	82.5982	41.4658	83.8966	86.5967	52.3693	32.5288	68.3989	40.7569	33.5616	35.0352	34.523	43.1508	47.4438	44.5242	25.5054	24.3882	21.509	26.9866	27.3458	26.3158	30.1609	31.2261	36.9937	42.6237	38.5047	37.5127
13q14.11	NM_152903	89890	KBTBD6	kelch repeat and BTB (POZ) domain containing 6	0.725456	-0.46304	4.81187e-07	5.21878e-05	4.73893	6.02609	4.49753	3.67574	4.97278	6.8226	5.73773	5.17902	3.16893	11.7969	2.35503	8.97099	11.75	4.06612	4.61627	7.1985	11.2377	5.35979	4.78346	3.99503	4.94752	6.50821	4.35657	11.157	12.9428	14.425	6.93408	9.11538	6.66238	15.7448	15.5013	14.7248	7.20952	7.65586	7.62031	9.87392	12.7126	11.6165	8.55995	6.67158	6.82444
1p36.12	NM_003196	6920	TCEA3	transcription elongation factor A (SII), 3	1.67517	0.744305	4.9051e-07	5.26269e-05	1.67391	4.23725	3.48232	2.1676	7.14462	6.25355	3.30827	1.15535	6.96735	1.28498	2.6337	0.967451	1.40268	1.34168	4.39821	5.14797	1.03956	3.79385	2.22283	2.5885	6.63944	6.14324	1.66895	2.18066	2.20606	2.43654	2.95002	1.25769	2.14476	0.845303	0.830263	0.83505	1.69447	2.5362	2.50525	1.71207	1.95376	1.88042	2.89881	1.95195	1.52478
5q35.2	NM_030627	80315	CPEB4	cytoplasmic polyadenylation element binding protein 4	0.692204	-0.530731	5.23325e-07	5.55504e-05	2.49417	4.18308	2.83328	1.77869	3.40419	6.05161	4.25644	3.32809	2.0429	10.9137	1.1034	6.36135	12.4272	2.04301	3.35219	4.05284	9.89639	2.44963	2.53819	2.40693	4.21624	5.12819	4.77264	6.51819	6.8996	7.3365	5.10636	4.98208	6.29711	11.6202	12.4212	11.8067	4.86268	4.72781	4.39203	7.11935	6.28713	8.25951	6.03315	4.88138	4.80376
18p11.32	NM_006101	10403	NDC80	NDC80 kinetochore complex component	1.48398	0.569475	6.12657e-07	6.33204e-05	1.53163	3.85701	4.3947	5.71385	6.38644	5.6335	1.45633	11.3251	3.61216	7.07751	3.87419	2.76889	4.81339	2.51964	7.23757	5.85844	3.52014	7.25659	11.1751	7.55805	2.59749	4.85308	2.92878	3.44699	3.40846	1.89306	8.99442	9.91253	9.02923	1.44289	1.22443	1.31979	4.29104	3.60631	3.18327	2.15919	1.76073	2.59389	4.65475	4.97331	4.59249
2p13.3	NM_006857	11017	SNRNP27	small nuclear ribonucleoprotein 27kDa (U4/U6.U5)	0.56522	-0.823115	6.11619e-07	6.33204e-05	4.17345	6.67016	9.28405	5.65581	5.2699	10.665	1.95496	5.97715	1.55822	16.7455	1.47623	11.6501	8.25764	3.64423	8.6184	9.98375	8.74225	4.41022	4.33928	9.68138	1.01798	7.79825	9.51964	15.4498	16.1981	15.9629	14.4754	20.9178	14.8058	15.1719	13.5214	12.3384	10.1771	11.087	11.4334	12.2797	13.3702	12.4378	13.3834	11.7977	13.3978
11p15.4	NM_003390	7465	WEE1	WEE1 G2 checkpoint kinase	1.33893	0.421082	6.15562e-07	6.33204e-05	1.63523	5.65038	6.66677	7.98605	5.11667	4.29237	2.13678	4.12316	4.75882	6.43614	4.48523	2.29159	3.72634	2.30547	5.52698	10.2707	3.31333	8.58808	10.1401	11.0312	1.75082	3.51193	8.01591	3.55033	3.45661	2.10639	4.47218	4.46052	4.34355	1.95963	2.79126	2.60057	3.34448	3.2533	4.25385	3.27858	2.16039	3.43489	3.79578	4.08352	4.72878
15q11.2	NR_022008	8123	PWAR5	Prader Willi/Angelman region RNA 5	0.643902	-0.635088	6.50042e-07	6.61849e-05	2.20149	6.57167	2.84234	2.94198	3.34427	8.17967	3.81752	1.91138	2.51564	11.5129	1.71242	4.5447	11.1455	1.57913	3.68969	5.98005	8.81101	4.6363	3.28325	2.94958	3.56784	3.6311	3.96205	5.9714	6.8426	4.91641	8.3736	7.31205	11.2314	11.0893	12.1675	10.6672	5.10399	6.70169	3.96596	11.99	6.77346	11.0821	8.63382	7.49591	7.13002
12q24.31	NM_003746	8655	DYNLL1	dynein, light chain, LC8-type 1	0.935668	-0.095931	6.65708e-07	6.67082e-05	206.722	223.282	148.337	169.418	156.768	164.169	213.536	150.966	177.098	105.609	169.241	124.589	134.719	184.872	158.736	148.608	103.232	161.409	178.462	134.925	89.3694	159.973	100.367	209.652	186.991	195.989	219.26	158.342	158.511	126.347	124.421	123.815	153.654	138.083	153.394	116.325	198.999	130.651	156.236	177.102	182.535
5p15.33	NM_004237	9319	TRIP13	thyroid hormone receptor interactor 13	1.53996	0.622888	6.68553e-07	6.67082e-05	1.31907	2.23633	4.41901	4.70666	4.43853	3.53051	1.01914	3.30054	3.61718	4.59407	2.33168	2.00568	2.5532	1.69538	4.19381	5.89126	2.09496	4.72281	4.761	3.81691	1.88758	2.96905	2.86042	3.40794	4.19425	2.81772	4.93644	4.92387	4.35431	1.59293	1.12381	1.36716	2.22985	1.74716	1.8858	1.59576	1.83967	1.52087	3.04887	2.41349	2.49845
6q14.1	NM_022726	6785	ELOVL4	ELOVL fatty acid elongase 4	0.675464	-0.566049	6.7947e-07	6.71263e-05	2.10103	4.06413	1.9142	2.05455	2.08502	3.32457	2.5581	3.70479	1.32438	7.77735	0.886272	5.56555	7.86279	1.73396	2.41315	3.10587	5.96518	1.88956	2.7411	2.46455	3.45344	6.18979	2.10642	5.52156	6.426	5.60083	3.98199	6.01157	4.30112	13.4079	13.5423	10.7672	4.02409	4.38441	4.33492	3.23605	5.55287	5.82519	4.25256	3.48791	3.86313
10q25.3	NM_020940	57700	FAM160B1	family with sequence similarity 160, member B1	0.722761	-0.468409	6.94262e-07	6.7347e-05	1.71455	5.38461	3.96793	2.99504	3.39813	4.93399	1.93411	1.98767	1.76402	5.75787	1.65707	3.77079	4.06976	0.969243	3.59365	4.94069	3.99911	2.3931	2.76341	2.20551	1.93019	3.01256	6.4414	5.23977	5.02851	4.76716	4.78828	5.30431	6.20337	5.18729	5.27558	5.57981	4.10282	4.69621	4.60004	4.63647	4.46028	6.50328	4.96017	4.3645	5.18939
4p15.32	NM_001145191	285550	FAM200B	family with sequence similarity 200, member B	0.79974	-0.322396	6.95204e-07	6.7347e-05	2.53608	3.199	3.7499	3.03613	2.9714	4.0514	2.02557	2.47274	2.35475	5.33326	1.75121	4.30889	4.75371	1.59118	3.18683	3.72117	3.84708	1.97992	2.46091	1.69441	3.45208	6.1322	4.56124	5.32742	4.52205	4.03805	4.90961	4.35698	3.61983	7.10375	6.1088	5.37697	3.88918	4.64518	5.33447	3.01664	4.29826	5.20727	4.95536	3.91401	4.44125
9q33.2	NM_005047	5711	PSMD5	proteasome (prosome, macropain) 26S subunit, non-ATPase, 5	1.37999	0.464657	7.45424e-07	7.15177e-05	3.01694	8.51587	8.51145	10.0214	8.80192	8.36972	4.61512	6.16795	7.38662	6.33824	6.4002	4.21111	5.62888	2.50769	9.01359	10.9174	5.17856	7.13199	6.06223	4.49073	4.40978	7.875	12.4592	6.44768	6.40523	5.71489	9.5661	6.18855	7.88919	4.40643	3.92073	3.70373	4.75855	5.53356	5.52418	3.08934	3.80792	4.29392	7.53895	6.19668	7.44458
5q13.3	NM_015566	26049	FAM169A	family with sequence similarity 169, member A	0.670325	-0.577068	7.63172e-07	7.25205e-05	1.86914	3.4822	2.43058	2.67382	2.19062	3.27842	2.08239	4.54554	0.753243	7.45047	0.542781	4.12288	6.35291	1.68725	2.38911	3.30942	5.35166	2.98793	3.50816	3.40746	2.71355	4.63904	3.60054	6.4984	6.20894	5.79515	3.62946	4.84722	3.775	10.2166	10.0871	8.72563	6.61054	7.35361	7.42459	5.45739	6.2185	5.82265	4.25244	3.80367	3.37841
17q24.2	NM_017983	55062	WIPI1	WD repeat domain, phosphoinositide interacting 1	1.2191	0.285811	7.70412e-07	7.25205e-05	6.07479	11.318	19.5443	13.8904	15.143	14.0245	7.3885	7.52541	13.2452	9.54377	9.16662	4.52775	6.87732	4.88911	15.2935	16.0899	5.32512	17.3427	14.1205	10.1685	10.2083	9.99094	28.113	6.69165	7.53812	6.08324	9.3349	9.8149	13.2031	4.64395	4.78894	4.29303	11.0819	11.0726	11.1244	5.94317	3.91014	5.41778	13.0578	9.92238	9.68136
4q12	NM_032313	84273	NOA1	nitric oxide associated 1	1.1613	0.21574	8.19859e-07	7.64538e-05	8.423	8.54712	11.673	12.3462	9.70587	9.48232	8.86284	10.5008	10.8903	8.0291	9.43066	7.46313	8.8364	5.32763	11.2893	10.8418	9.96843	13.163	12.7327	11.8011	10.5837	11.9561	13.3559	7.33626	8.10523	8.89617	9.67729	6.49411	8.80899	7.22083	6.81095	7.31093	6.24603	6.80705	6.96602	5.48529	6.91585	6.886	9.78344	8.33863	9.2558
19q13.41	NM_001145434	400713	ZNF880	zinc finger protein 880	0.707272	-0.499663	8.3757e-07	7.73821e-05	2.36566	4.89662	4.99214	4.66887	6.63371	7.25036	3.72699	7.82784	3.33283	9.29699	2.91551	5.23154	10.0173	3.06788	6.92805	8.39325	8.85031	7.38088	7.36912	6.74613	4.65564	8.91632	6.62222	11.4779	12.2281	9.9502	10.9421	9.89622	8.67105	35.5343	26.6411	27.1253	12.1572	12.8906	12.9554	9.53468	7.56966	11.9683	9.50663	8.32273	8.1743
1q21.3	NM_001826	1163	CKS1B	CDC28 protein kinase regulatory subunit 1B	1.1142	0.15601	8.89059e-07	8.04274e-05	41.8877	49.5033	70.6173	79.2098	52.8708	44.7975	30.4798	90.114	51.7679	36.786	43.9939	21.89	26.3126	53.7768	70.0746	76.449	24.2015	88.3898	116.695	72.6136	20.9137	37.226	35.3883	35.1832	45.2914	29.3914	60.9773	71.0352	54.3313	13.4643	12.3706	11.6955	49.068	34.3059	41.6017	30.2669	35.8487	22.4822	38.5565	43.5925	36.364
11p13	NM_001033505	1479	CSTF3	cleavage stimulation factor, 3' pre-RNA, subunit 3, 77kDa	0.572507	-0.804634	8.81964e-07	8.04274e-05	1.57304	1.99394	2.32306	2.00628	1.59643	3.84629	0.244706	5.5963	2.32925	11.2607	1.31844	5.28953	6.42355	1.61952	4.89036	5.53549	3.52845	2.09896	2.58519	0.514317	2.10783	6.65966	3.24234	9.70402	8.39386	5.05805	5.66415	7.74961	7.37615	7.97508	7.39834	6.72452	6.47202	5.69412	4.85432	4.50726	3.35044	6.57246	4.70641	4.46909	4.86497
6p24.3	NM_030810	81567	TXNDC5	thioredoxin domain containing 5 (endoplasmic reticulum)	1.1084	0.148472	8.94712e-07	8.04274e-05	20.0903	73.4971	66.8728	63.5647	76.5243	74.386	29.9192	24.1274	70.6368	24.6788	54.7179	11.4962	16.4664	11.9263	67.3954	77.7035	12.9423	57.5488	46.7483	41.8777	23.1673	32.0732	64.8308	34.3567	46.3857	34.0907	45.4336	37.189	42.1988	11.1451	12.2866	10.1381	26.9615	26.4584	29.5003	21.0291	16.744	19.4189	47.5488	48.619	41.3255
7q21.11	NM_000722	781	CACNA2D1	calcium channel, voltage-dependent, alpha 2/delta subunit 1	0.622229	-0.684482	9.20785e-07	8.2032e-05	2.2743	3.81232	1.55241	1.33184	3.04746	5.05564	4.39318	0.900759	2.13938	11.8805	1.18325	5.09311	6.29522	1.25697	3.04588	3.32485	8.4966	2.55727	2.3535	1.92256	3.64186	7.07697	1.29013	4.66355	3.94819	3.92861	6.40102	7.84692	5.9927	11.9343	11.7288	11.9892	4.6326	5.57149	4.59418	8.28686	8.76043	10.7118	4.97395	4.42596	4.8578
8q24.22	NM_006096	10397	NDRG1	N-myc downstream regulated 1	1.34896	0.43185	9.49356e-07	8.32122e-05	8.94289	9.26117	41.0272	22.55	83.4423	53.0494	22.2014	4.21384	38.5179	5.2918	20.7194	10.5668	12.9298	4.71148	38.7335	33.7679	11.8248	34.241	23.2896	23.884	9.60799	6.20526	23.2028	16.6887	21.4171	17.1397	14.0182	18.5593	10.7969	7.04036	7.1626	7.13648	11.2403	10.8921	14.1015	8.68152	6.9017	8.90537	21.7749	21.0341	21.6109
11q23.3	NM_001028	6230	RPS25	ribosomal protein S25	1.04952	0.0697346	9.50711e-07	8.32122e-05	902.437	1518.07	1653.48	1947.51	1687.59	1208.57	1022.65	2051.31	1267.05	886.453	1152.72	794.318	906.767	997.144	1526.41	1692.39	715.543	1881.13	1709.49	1256.5	694.439	1470.19	1108.1	1108	1197.12	1094.1	1031.81	1058.02	1151.28	518.755	499.475	435.26	895.687	844.799	954.169	681.164	1121.25	909.644	1163.15	1066.96	1076.45
12q24.11	NM_207435	400073	C12orf76	chromosome 12 open reading frame 76	0.744364	-0.42592	9.96621e-07	8.5102e-05	3.21566	3.50423	3.71739	5.28569	3.23595	4.08868	2.84541	4.05966	1.55227	6.37691	2.01761	5.33375	6.21393	2.36473	4.47567	4.75065	4.85239	3.96813	4.83976	3.0277	6.16176	11.5647	4.29068	6.60927	7.29868	7.35911	6.31941	6.87865	6.43151	10.2652	8.74536	7.5717	4.83449	4.61519	4.91185	5.54568	6.68029	7.02539	6.97569	5.08015	6.05893
17q21.2	NM_001254	990	CDC6	cell division cycle 6	1.55175	0.633895	9.97888e-07	8.5102e-05	0.871496	3.33575	4.7574	4.71556	4.35798	4.63951	1.05466	3.11245	4.30315	4.71218	2.89903	1.5469	2.67116	1.41513	5.2329	6.30462	1.71827	5.56097	6.9101	5.38745	2.23093	2.09411	3.02737	3.69845	4.83116	2.12733	5.38495	5.63095	5.74875	1.3171	1.06412	1.01984	2.43462	2.59988	2.39198	1.66199	1.09607	1.41927	2.98041	3.43574	3.0941
19p13.13	NM_005809	7001	PRDX2	peroxiredoxin 2	0.961432	-0.0567436	9.90352e-07	8.5102e-05	305.332	171.788	203.568	221.658	156.166	136.433	206.302	284.61	209.761	204.139	161.805	148.089	174.391	318.729	219.809	209.638	146.041	244.963	198.913	201.104	260.58	300.903	127.125	196.771	207.039	195.073	169.359	264.519	193.763	190.609	176.701	172.517	208.039	180.503	191.582	163.282	217.169	154.958	177.428	197.3	233.281
16p13.13	NM_152308	116028	RMI2	RecQ mediated genome instability 2	1.5271	0.610792	1.03323e-06	8.66353e-05	1.87222	2.43292	7.72347	8.57302	4.58583	3.55954	1.50304	2.08304	2.27569	5.54019	1.83933	2.64669	2.52251	2.65355	6.44891	8.2082	3.27012	10.3028	9.49778	9.28056	2.18235	0.971313	3.36396	2.49348	4.48648	2.74761	4.2909	6.87074	4.9715	1.19383	1.38422	1.00517	4.01991	3.77073	3.86007	2.322	1.66003	1.98122	3.79305	4.79192	3.68202
16p11.2	NM_194280	124446	TMEM219	transmembrane protein 219	0.771392	-0.374465	1.02518e-06	8.66353e-05	25.2578	18.0188	23.6548	22.0564	18.6352	13.7338	20.8802	24.5802	25.9974	13.2253	21.2219	11.3592	10.4727	19.4761	28.7818	27.3474	10.3365	17.769	17.6347	15.4231	19.5156	19.2414	19.3881	35.6368	25.2121	25.5486	27.0259	29.3724	34.0191	17.9811	17.8556	15.7797	31.6058	24.5282	27.6046	12.2055	26.0581	20.3317	35.8136	35.6081	41.074
3p25.3	NM_001018115	2177	FANCD2	Fanconi anemia, complementation group D2	1.57685	0.657047	1.0807e-06	8.98606e-05	1.04863	2.01483	3.5229	4.11604	3.00358	3.48199	1.17851	5.07931	2.63178	5.96714	2.18983	2.42162	4.15235	1.45964	4.88905	5.81637	2.85124	6.68447	8.66013	6.19451	2.33158	3.49332	2.68059	2.68326	2.6749	1.56549	4.65507	5.94319	5.07124	1.68269	1.38331	1.33634	2.64024	2.64866	2.16917	2.10076	1.69905	1.70959	2.46561	2.26687	2.36895
6p22.1	NM_003546	8368	HIST1H4L	histone cluster 1, H4l	1.15824	0.21194	1.09845e-06	9.05814e-05	345.502	211.944	247.106	325.974	125.279	133.846	125.454	157.333	275.399	104.096	396.337	83.0374	83.0438	252.237	224.954	188.354	58.7115	283.526	280.035	204.17	145.498	164.425	66.8003	127.025	120.973	89.3538	267.614	229.317	191.557	15.3596	22.3736	14.2034	137.585	128.152	121.309	67.0279	96.6087	56.6672	104.27	129.055	127.568
11q23.2	NM_004724	9183	ZW10	zw10 kinetochore protein	1.25699	0.329975	1.11544e-06	9.12287e-05	2.11008	4.08594	5.989	6.54341	6.5979	6.6672	2.72512	6.20169	6.03162	6.7748	4.30179	4.13102	5.27014	2.36211	7.65807	8.69601	4.37375	7.18098	7.96001	5.74365	4.54978	8.2898	8.81761	5.98151	5.14457	4.23303	7.4638	6.99099	8.67771	4.08482	3.51775	4.00371	4.55736	4.76949	4.69547	2.99202	2.38611	3.76586	6.52337	5.66267	5.43219
22q12.2	NM_152511	150290	DUSP18	dual specificity phosphatase 18	0.799508	-0.322815	1.19953e-06	9.68155e-05	3.05435	2.8996	1.21946	1.03887	1.45769	2.00529	5.19064	0.668797	1.73038	1.91741	1.27763	1.24717	2.13569	1.47431	1.96152	1.63694	2.68605	1.10241	1.09763	1.6501	1.9403	1.12559	1.05972	1.41583	1.78072	2.15893	1.85367	2.06872	2.14461	3.2304	3.42417	4.01025	1.4457	1.85533	1.68557	3.56196	2.98196	2.07167	2.48588	2.42356	2.33352
1p36.33	NM_006983	8510	MMP23B	matrix metallopeptidase 23B	1.9067	0.931079	1.21891e-06	9.68155e-05	3.78332	6.91173	11.3688	9.06658	7.37135	2.78246	5.60687	1.35076	12.4213	1.00101	12.2789	0.440136	0.477347	1.68159	6.75661	6.06102	0.610599	5.43744	4.26823	5.04803	3.92134	2.18477	5.65129	1.53646	2.03741	1.70662	3.24221	2.74945	3.22666	0.258894	0.188999	0.455322	1.43985	1.53629	1.63219	1.20592	0.743122	0.89705	3.88138	5.49417	5.22693
6p24.2	NM_001100829	100113407	TMEM170B	transmembrane protein 170B	0.624132	-0.680078	1.22257e-06	9.68155e-05	1.32372	2.10522	1.74905	1.56023	1.67872	2.60639	1.90781	2.2984	0.563524	8.86721	0.546964	7.24484	6.50391	1.07947	2.12107	2.73648	9.74456	1.55119	2.01553	1.89841	2.18668	3.70895	1.19352	4.88281	4.95323	4.84718	3.48131	4.55182	3.53494	8.80513	8.77251	7.33435	2.96926	4.0877	3.82575	4.58416	5.21626	5.85179	2.98953	2.68881	2.92292
12q23.1	NM_001032284	7112	TMPO	thymopoietin	0.604527	-0.726121	1.20905e-06	9.68155e-05	4.86087	5.8952	4.14713	2.98921	4.89175	8.19761	4.44261	9.9092	3.3491	13.8447	1.95592	7.23523	7.49354	6.7321	3.30683	5.88781	9.54003	6.25995	8.35505	8.34729	6.50434	9.3539	0.532722	7.47969	8.52038	10.6988	22.3153	12.6125	10.2608	13.6718	12.0958	12.2861	13.9204	12.4188	13.7135	12.4555	21.356	14.9492	6.541	7.01214	7.57443
1q32.3	NM_016448	51514	DTL	denticleless E3 ubiquitin protein ligase homolog (Drosophila)	1.46529	0.551185	1.30933e-06	0.00010287	1.06184	2.89782	4.27248	3.5819	2.49986	3.76068	1.0776	3.88518	2.69114	5.69239	2.49128	1.4882	2.66561	1.37042	4.36516	5.3769	2.00334	5.20576	6.37815	4.87584	2.133	2.21545	1.81724	2.98909	3.60005	2.04702	4.27527	5.28616	5.28665	0.812342	1.13624	0.644386	2.2147	2.21216	1.60451	2.37948	1.96032	1.53681	2.60028	2.53814	2.67549
21q21.1	NM_001338	1525	CXADR	coxsackie virus and adenovirus receptor	0.666012	-0.58638	1.33069e-06	0.000103732	5.4472	8.54947	10.3662	7.92128	9.22588	15.3692	8.44028	9.09604	3.64701	26.0929	2.18813	24.4998	25.2818	3.12294	8.61556	14.3621	23.9146	10.1809	10.2091	8.94245	7.04572	15.5876	10.3869	17.7794	18.8071	19.5879	14.4344	18.7274	13.1597	36.4519	35.5813	30.8785	12.9658	15.5438	14.8933	18.8381	25.0866	24.5306	17.3104	15.4631	15.8758
15q11.1-q11.2	NR_036432	283755	HERC2P3	hect domain and RLD 2 pseudogene 3	0.608143	-0.717518	1.34612e-06	0.000104121	1.22273	2.376	1.12681	0.790925	1.87491	2.59586	1.60125	2.16295	3.14163	4.46659	1.77591	2.50936	5.13761	1.32272	2.50774	2.43259	5.02101	2.52316	4.1289	3.97334	2.05622	1.82639	2.40071	3.7206	4.26139	3.62343	4.62385	3.47665	3.21407	6.18457	6.92742	6.49895	7.48187	7.47972	6.60534	4.07875	1.94212	2.96087	7.62099	6.23522	6.62
1p36.33	NM_001039577	81669	CCNL2	cyclin L2	0.787947	-0.34383	1.37403e-06	0.000105462	7.34667	8.06027	8.74621	8.9994	6.90109	8.36345	9.57258	4.31479	5.95706	13.5287	4.41901	10.2229	12.1059	8.31016	13.0806	14.0825	12.9075	6.72313	9.27941	7.47096	5.14056	5.43571	17.2568	11.0227	9.5463	12.3617	10.9743	9.47063	8.72077	14.1741	13.6048	15.5986	14.4636	13.1582	11.7654	21.6286	11.4109	15.9292	14.3888	12.8595	8.9856
12p13	NM_019858	27239	GPR162	G protein-coupled receptor 162	0.683715	-0.548532	1.44194e-06	0.00010983	18.4383	13.9522	3.7775	3.12749	3.78216	4.63933	22.9943	5.40053	5.13792	8.28724	6.53429	11.7457	14.3135	12.6907	6.93742	5.05965	11.6101	4.19381	4.07203	3.75299	15.3654	9.74765	2.4259	10.4004	8.94831	9.99707	4.92781	9.42243	7.21599	16.0574	16.2883	17.1136	9.71292	8.45162	8.43926	9.62422	10.3151	9.42993	12.362	14.071	17.3469
9p21.1	NM_002197	48	ACO1	aconitase 1, soluble	1.07374	0.10264	1.47122e-06	0.000111211	4.85765	7.93508	10.4334	7.67922	10.5414	10.3079	5.56311	6.85879	8.3512	9.46712	7.38829	4.61229	8.0139	3.39793	13.2535	13.834	6.69333	10.2854	11.4363	8.57166	6.38176	7.81372	13.0905	7.60313	10.4423	7.1949	9.69117	10.1003	10.3037	5.28976	4.53704	4.78951	9.75116	9.21575	9.95004	5.86485	4.84534	5.85227	9.65553	8.0526	7.99505
6p21.2	NM_001243186	5292	PIM1	pim-1 oncogene	1.33731	0.419331	1.51753e-06	0.000113849	7.58326	6.54997	12.4674	10.5885	7.29029	6.74744	7.50949	12.6393	11.9936	7.67882	6.87967	6.18641	7.06622	6.45799	9.88802	12.5746	7.17365	19.1223	24.6619	18.9721	6.93959	3.16935	14.0938	4.31318	4.80555	4.35663	5.70686	5.82987	4.64816	4.23064	3.81333	4.68779	7.63994	5.00638	9.2093	5.56777	4.75584	5.20014	6.46017	7.13544	6.6495
12q13.13	NM_001193511	7786	MAP3K12	mitogen-activated protein kinase kinase kinase 12	0.785816	-0.347736	1.58023e-06	0.000117668	6.17901	4.5735	2.6132	2.05227	2.19337	3.54121	6.49744	1.41864	7.47747	5.1197	4.02264	2.8373	4.09595	4.38166	5.36294	3.00767	4.64819	2.98317	4.77926	4.04117	6.28927	2.07145	3.75455	3.70918	5.16482	4.65257	5.39868	4.53996	4.5446	6.78261	6.34121	7.15459	4.7476	6.40677	6.53732	5.55269	5.51731	5.39995	5.32951	3.60829	5.19891
7q33	NM_001130929	647087	C7orf73	chromosome 7 open reading frame 73	0.785453	-0.348403	1.66337e-06	0.000121198	9.85536	17.2987	13.6078	16.4257	13.5824	14.4948	12.2027	12.7259	8.37328	14.8491	7.53779	10.0681	8.40172	12.7095	5.80196	5.77947	8.58351	8.86018	15.1729	13.9074	6.37517	13.5828	11.684	15.5586	15.7179	15.337	10.6512	14.5691	12.2146	14.451	15.032	12.7527	13.4105	13.6947	13.8907	11.8677	19.4621	14.1476	15.6113	18.0136	17.8745
10q23.2	NM_019054	54537	FAM35A	family with sequence similarity 35, member A	1.33808	0.42017	1.66294e-06	0.000121198	1.87035	4.9988	5.47071	6.06783	6.6662	6.92092	2.36086	5.30787	3.46503	5.85216	3.9865	4.04617	5.52387	1.3251	7.05111	8.69137	5.86072	5.62878	7.8683	6.2407	2.16907	6.57277	7.56031	5.26768	5.26559	3.26092	5.71426	4.60934	6.09034	3.67404	2.83408	3.47802	4.76726	4.9828	4.5173	2.71091	2.09067	3.4955	5.21716	3.96535	4.10451
13q12.3	NM_007106	5412	UBL3	ubiquitin-like 3	0.773863	-0.369849	1.66408e-06	0.000121198	5.85554	7.51511	14.1627	10.8137	9.84297	13.7207	6.56217	5.01591	5.95737	10.2148	5.11932	7.73348	7.64556	3.40341	7.79809	11.7247	7.51211	9.33677	8.33577	7.19081	5.45239	9.19028	23.0365	9.53763	10.5914	9.75745	10.9253	10.6252	10.8857	18.5996	17.867	17.3384	9.2363	10.0078	10.4379	16.0541	21.9885	17.7294	13.7326	11.8516	10.9009
8p21.2	NM_152562	157313	CDCA2	cell division cycle associated 2	1.60415	0.681806	1.72841e-06	0.000124971	0.88525	1.75452	2.86257	2.99048	3.23596	3.24021	1.00851	5.49301	2.83001	4.36116	2.16657	1.2369	2.49196	1.00028	4.11272	4.11091	2.77562	6.57376	9.24555	7.55407	1.06309	2.01656	1.81864	1.78268	2.17615	1.10473	5.23133	4.80119	4.50988	0.753871	0.728762	0.74588	2.15283	2.4393	2.13766	2.09921	1.22274	1.59842	2.21534	2.41342	2.33964
2q21.3	NM_005915	4175	MCM6	minichromosome maintenance complex component 6	1.26036	0.333833	1.75084e-06	0.000125682	2.97355	7.95629	7.78397	12.6366	9.68866	9.50654	3.49763	11.6023	8.33384	11.9677	8.46912	6.63703	8.17816	2.74911	13.8039	14.1119	10.4042	17.4392	20.8858	16.6127	6.78264	11.1025	6.24747	11.2921	10.8096	5.84123	12.0407	12.7979	13.1055	5.52559	4.69183	5.3823	7.06253	7.65158	7.02557	5.19102	4.45778	5.43456	7.48773	7.9926	8.7665
22q13.33	NM_001145135	1375	CPT1B	carnitine palmitoyltransferase 1B (muscle)	0.645355	-0.631834	1.84007e-06	0.000129297	1.57745	1.10913	1.58475	1.02364	1.42989	1.73838	1.68332	1.30575	1.17831	4.13862	0.215883	1.8972	1.55732	1.88067	2.91638	2.9748	2.35559	1.3941	1.36668	2.34617	4.17098	1.38854	1.76979	2.27839	1.73018	3.34614	2.71025	2.46507	2.36502	3.95814	4.48837	4.93371	4.8373	2.99645	4.78508	5.33947	1.44943	4.07311	3.11189	3.23065	3.27567
Xq13.2	NM_021963	4674	NAP1L2	nucleosome assembly protein 1-like 2	0.679615	-0.55721	1.82683e-06	0.000129297	1.21852	1.93424	0.569784	0.731676	1.09191	2.37468	2.60168	1.14372	0.219224	4.39281	0.280088	3.58478	5.72547	0.681848	1.36051	1.55483	3.70437	1.10546	1.14054	0.962124	3.31784	4.74128	0.457491	2.72035	2.45043	2.47119	1.46715	3.52769	3.10731	12.7212	10.6591	10.8573	3.06106	3.41316	2.91515	3.21549	3.81121	5.0777	3.92032	2.49564	2.63623
1p13.2	NM_033020	51592	TRIM33	tripartite motif containing 33	0.732312	-0.44947	1.83377e-06	0.000129297	0.941538	2.317	2.01408	1.78179	2.50023	5.03083	2.33252	1.93524	2.00929	5.27355	1.98643	2.32079	4.56172	0.621566	2.33164	3.58973	2.98868	2.39715	2.45037	2.57703	2.90758	2.76731	3.17063	3.16963	3.36763	1.90621	4.5854	5.46529	5.63475	6.63439	6.02069	4.7593	3.77468	4.10389	3.17799	3.47486	3.6964	4.07705	3.93013	4.04072	3.96259
5q22.1	NM_138773	91137	SLC25A46	solute carrier family 25, member 46	0.73635	-0.441537	1.8751e-06	0.000130837	3.1044	6.40539	7.50185	5.73101	7.11883	8.81476	3.3033	3.98462	4.26724	10.3935	3.13905	8.8667	9.64165	2.0718	6.14143	8.50811	8.62218	4.97671	4.71265	3.80123	4.88744	10.1475	10.9952	10.7921	12.154	10.7389	10.7192	12.2854	10.6871	15.1731	14.5947	12.9928	8.23226	10.107	10.6581	7.52482	9.77643	10.3312	9.40482	9.02515	8.11773
5q13.2	NM_022909	64946	CENPH	centromere protein H	1.40852	0.494179	1.92073e-06	0.000131268	3.81849	6.39322	15.017	20.1114	7.71754	8.08347	3.74291	14.9219	3.85258	19.2414	4.46572	11.3723	12.5223	4.87786	10.1562	14.9746	9.6678	16.363	20.5497	16.3501	4.42648	10.7849	5.46343	8.76223	11.7153	7.44616	9.2385	19.6129	9.77868	5.40201	4.62054	4.08136	4.49809	4.88782	5.31173	4.00533	6.82141	5.67445	6.6582	5.24649	5.46454
Xq13.1	NM_001024455	340526	RGAG4	retrotransposon gag domain containing 4	0.794496	-0.331889	1.91736e-06	0.000131268	4.71016	5.25931	1.75861	1.20054	2.52708	2.89727	6.46014	1.91214	2.88912	5.8699	2.37559	3.18013	5.30221	4.07059	2.82089	2.20933	7.6535	3.46592	2.62051	2.952	4.23701	2.36237	2.53518	4.34519	4.23466	5.28277	3.63571	2.72295	3.38948	7.77937	8.90325	10.4159	4.7592	4.39216	4.22181	5.26917	4.25727	3.44034	2.89926	3.60844	4.22867
15q25.1	NM_007364	23423	TMED3	transmembrane emp24 protein transport domain containing 3	1.15492	0.207788	1.90066e-06	0.000131268	70.2887	67.9561	60.7979	62.4821	55.1867	40.8348	64.5011	95.5446	76.3591	29.3936	78.6857	32.1255	38.0547	57.414	62.7281	50.5271	36.8528	54.566	45.3911	46.0221	71.0523	59.1252	73.9539	49.0505	42.2381	46.1673	25.4485	37.0019	35.5412	26.8488	27.0416	23.8426	29.5658	24.2718	28.7706	26.2487	35.6058	28.7288	38.4597	46.1943	53.1883
11q24.2	NM_001114121	1111	CHEK1	checkpoint kinase 1	1.7265	0.787849	1.98774e-06	0.000134673	1.46634	1.97291	2.803	3.98368	2.5998	2.17965	1.30664	5.11078	4.63312	2.90219	3.63954	2.02984	3.26707	2.21478	3.941	3.80028	2.19586	4.19656	6.15087	4.09434	2.83759	4.56847	2.83219	2.21791	3.08792	1.82247	3.20201	3.79693	4.20376	1.07792	1.03618	0.932814	1.28287	1.6982	1.41662	1.12868	0.497953	2.06103	2.45248	2.55473	3.02867
7p14.3	NM_007270	11328	FKBP9	FK506 binding protein 9, 63 kDa	1.25354	0.326011	1.99756e-06	0.000134673	9.14758	24.414	14.8201	6.1083	21.3581	21.0963	14.6865	7.58828	32.3645	15.0456	18.4626	4.98506	13.4973	5.85715	24.7045	25.0582	10.1112	18.842	12.3136	11.6886	14.1888	12.7857	17.1771	8.26611	10.9455	7.93131	14.0307	14.1496	13.3921	7.62303	7.82066	7.27612	10.7974	12.0809	12.8405	9.30543	5.97765	7.88117	17.7775	16.4374	17.6065
22q12.1	NM_020437	57168	ASPHD2	aspartate beta-hydroxylase domain containing 2	0.820954	-0.284627	2.05216e-06	0.000136509	2.22118	2.0066	1.00423	0.886327	1.57124	1.85891	3.18798	1.52565	0.882442	3.36037	0.72945	3.09511	3.84911	2.34313	0.951287	1.69011	4.01602	1.4708	1.39815	1.25682	3.17676	2.45498	0.863529	2.434	2.58991	3.50101	1.93465	2.665	1.2784	7.30492	7.26657	6.69053	2.25566	2.11553	2.28593	2.70084	3.8061	3.18135	1.92209	1.92824	2.66001
1p32.3	NM_052940	115353	LRRC42	leucine rich repeat containing 42	1.22364	0.291178	2.04539e-06	0.000136509	7.8674	5.03983	13.5602	13.4175	10.926	11.064	5.23884	9.23095	9.07422	7.63605	8.3309	8.60582	10.2512	4.57714	13.1052	15.8154	10.5693	16.8968	11.6629	9.75947	6.40312	9.95672	14.5299	5.45511	6.7187	4.75575	9.71903	11.2405	7.49704	5.19206	5.07252	5.40336	9.71497	8.41432	12.3631	7.15163	6.30746	8.6664	7.45416	5.9858	6.27494
9q34.3	NM_013379	29952	DPP7	dipeptidyl-peptidase 7	1.42554	0.511506	2.08142e-06	0.000137539	39.1788	33.1979	43.8207	36.4004	36.7208	28.1539	36.2194	12.6015	54.4445	16.7423	54.4382	19.3998	17.8071	27.6594	48.9694	38.2466	17.6886	32.9664	18.6973	19.4625	25.6953	14.3349	36.5385	20.9607	21.344	18.2241	12.5436	11.4103	21.3139	3.78013	3.9871	4.18515	31.3435	25.7746	33.6072	8.82468	7.845	7.3625	29.6529	32.6053	37.8182
8p11.23	NM_004095	1978	EIF4EBP1	eukaryotic translation initiation factor 4E binding protein 1	1.12795	0.173705	2.17042e-06	0.000142476	70.9577	117.81	136.027	119.709	118.884	94.6283	71.9976	82.7586	207.161	42.8458	195.826	42.4641	43.9925	66.9021	105.142	99.8296	45.838	90.7104	63.8929	66.908	57.3248	55.047	97.5494	68.7604	71.6244	56.3992	73.8496	66.1285	56.9518	16.1239	18.4123	14.4939	73.3229	58.0774	73.8154	38.9246	43.2861	33.6642	78.8889	98.447	102.144
17q11.2	NM_014573	27346	TMEM97	transmembrane protein 97	1.22919	0.297709	2.18567e-06	0.00014254	8.55087	12.3246	36.433	40.6748	20.5843	18.8878	7.42702	43.6755	17.3616	23.7222	14.1983	19.3694	19.5128	11.6202	22.8156	27.4021	18.0864	23.9432	36.3429	31.275	13.5353	18.2668	10.8238	16.5466	21.674	18.6329	25.3659	30.5386	18.2586	12.0425	10.777	10.6393	14.4114	12.5151	14.5163	10.2719	11.3459	11.1549	12.2463	10.9548	11.6705
12q13.3	NM_001261413	10540	DCTN2	dynactin 2 (p50)	1.10281	0.141186	2.23442e-06	0.000143417	27.7418	29.0017	35.428	34.4273	26.9918	24.2558	30.5647	48.4717	34.1631	27.6061	28.5311	19.9235	30.3418	32.9556	38.2463	36.0908	26.5132	51.8565	44.3578	39.643	29.5288	39.948	40.7504	20.2697	23.5882	24.7535	22.1427	37.6493	32.5977	17.0906	12.3888	14.5856	33.2535	25.0539	26.7857	23.5175	27.3971	20.8453	29.6562	29.4223	34.1133
5q14.1	NM_001190470	100462981	MTRNR2L2	MT-RNR2-like 2	0.833947	-0.261972	2.22011e-06	0.000143417	1239.44	520.676	2002.87	2049.75	1575.91	1360.71	1000.49	1624.12	759.469	1618.1	1160.7	2139.57	1894.85	1932.23	1074.02	791.024	1308.49	783.71	947.696	980.821	1998.82	2053.61	1427.03	2195.17	1814.37	2175.84	1192.9	2323.45	1583.57	1836.49	1856.69	1844.03	1344.37	1367.09	1367.84	1212.22	2477.43	1893.21	1293.16	1363.53	1522.88
1p32.3	NM_014372	26994	RNF11	ring finger protein 11	0.806609	-0.310059	2.24223e-06	0.000143417	11.2238	19.7613	23.6161	20.1226	20.7061	26.2528	12.1132	21.6307	13.5895	32.6847	8.37146	28.0971	27.3223	11.1021	18.2568	24.7018	25.748	18.9015	17.016	15.219	12.0291	17.3636	25.61	31.1724	33.736	34.6191	23.3844	28.4227	22.7423	37.1327	35.4664	32.8215	30.4266	30.0209	33.5824	23.4779	29.5514	28.2011	26.7733	23.7762	23.5695
6q14.1	NM_003318	7272	TTK	TTK protein kinase	1.46226	0.548199	2.28642e-06	0.000145311	1.47439	3.21258	5.33201	6.23717	3.72001	5.5909	0.839922	9.04696	2.69484	7.52537	2.40814	4.70961	4.97275	1.52677	6.41854	7.85818	4.16578	8.04024	10.2246	8.43999	2.69398	5.14966	3.24317	2.88029	3.25049	2.62695	7.10905	9.58545	8.81434	1.91729	1.46595	1.62184	2.81948	3.48436	3.83999	2.2582	2.04063	2.72112	4.27214	3.76442	3.24026
12p12.1	NM_005504	586	BCAT1	branched chain amino-acid transaminase 1, cytosolic	1.44272	0.528787	2.32726e-06	0.000146971	2.83474	17.8586	12.7089	12.5457	20.8791	23.6684	5.06594	11.3002	16.9833	7.49338	13.552	2.047	2.61973	1.82375	16.5726	19.7651	1.57756	15.4677	16.5762	13.4048	3.29407	6.59152	19.5509	4.65977	3.29486	1.08398	15.8886	10.6018	12.0808	1.80523	1.03239	3.0097	4.17648	4.62206	6.81376	5.28659	2.93087	3.94036	13.6951	14.2259	15.39
13q12.2	NM_000982	6144	RPL21	ribosomal protein L21	1.088	0.121679	2.36571e-06	0.000148459	273.554	1062.6	671.905	685.307	542.133	253.625	422.296	908.537	703.664	345.409	437.377	368.695	284.254	413.905	880.182	779.428	248.889	807.438	583.641	724.667	575.267	1096.66	398.204	236.597	645.253	613.517	222.138	709.26	388.134	76.9761	256.019	86.7478	282.995	245.277	341.458	130.424	568.126	292.169	275.792	368.189	289.176
1p36.32	NM_018836	55966	AJAP1	adherens junctions associated protein 1	0.610026	-0.713057	2.49549e-06	0.000152086	3.27326	1.28843	1.02654	0.647064	1.68677	2.1794	1.235	0	0.770056	0.950829	0.570222	0.109305	0.374215	1.01024	0	0	0.33578	0	0	0	4.12101	3.16726	0.087114	2.9296	3.1171	3.22609	1.55613	1.15699	1.19976	7.87547	8.53285	8.94782	1.1266	0.78238	1.13359	0.209658	0.134863	0.148599	0.92144	1.02221	1.52051
7p14.2	NM_018685	54443	ANLN	anillin, actin binding protein	1.42243	0.508357	2.49971e-06	0.000152086	1.22235	3.81043	5.88224	3.61661	5.33539	4.48715	0.652899	4.98125	4.73232	4.93642	3.32535	1.92582	3.22097	1.18054	7.88468	7.39836	2.51225	7.02635	8.31139	5.65393	2.71671	3.06677	5.44584	3.98398	2.49601	2.17739	6.0631	5.56964	7.47085	1.7275	0.43334	0.97057	5.07173	4.51354	4.03695	2.53194	1.83522	1.42576	3.55262	4.64074	4.48141
14q11.2	NM_021178	57820	CCNB1IP1	cyclin B1 interacting protein 1, E3 ubiquitin protein ligase	1.15461	0.207408	2.47979e-06	0.000152086	14.1975	30.2847	34.6948	53.6596	38.128	27.0922	15.3269	118.888	25.0599	39.9826	22.1811	32.7618	37.1772	20.8781	44.0622	58.9178	27.3278	70.1364	89.7874	66.3728	23.2571	53.2401	28.5424	35.5334	38.8778	41.7536	20.6108	37.2285	34.3354	24.6869	21.4786	15.5699	26.4139	28.9276	32.8088	13.7348	20.7061	24.5769	24.0498	22.8431	22.7124
2q33.1	NM_173822	285172	FAM126B	family with sequence similarity 126, member B	0.772943	-0.371565	2.45974e-06	0.000152086	0.900851	1.84226	1.17284	0.911225	1.0433	2.02533	1.27271	1.85572	1.02144	4.10184	0.68407	3.09649	4.1692	0.713875	1.37093	1.93032	4.91541	1.21166	1.76198	1.69293	1.38453	2.26124	2.01527	3.11825	3.25815	3.1998	2.58032	3.05439	2.98132	4.72937	4.94395	4.34735	1.80602	2.37532	2.10721	2.91279	3.04518	3.82561	2.24593	2.17072	2.20666
7q21.11	NM_012301	9863	MAGI2	membrane associated guanylate kinase, WW and PDZ domain containing 2	0.683103	-0.549825	2.45069e-06	0.000152086	2.80305	1.89358	0.524936	0.001568	1.05716	2.47729	4.3916	1.12846	0.005069	2.52373	0.000292	2.31525	3.05534	1.8291	0.504889	1.51519	4.24829	0.002684	0.536654	0.003293	2.96688	3.0367	0.748281	2.54787	2.6636	3.1228	2.51782	1.75002	2.38695	6.94426	7.08144	7.52786	1.18363	0.87811	0.000515	4.10559	4.32288	5.02074	2.84899	2.42786	2.99288
1q31.3	NM_194314	360023	ZBTB41	zinc finger and BTB domain containing 41	0.65811	-0.6036	2.55834e-06	0.00015471	1.7099	3.83756	2.42188	2.13763	3.64286	5.15179	1.8074	4.02048	1.63024	8.98693	1.09677	5.31869	7.63482	1.01798	3.22271	3.79935	7.2928	3.07118	3.20501	3.00343	2.8004	6.81053	4.35883	5.58381	4.99663	4.82304	5.73341	7.40692	7.02552	8.67285	9.06767	8.07897	4.91521	6.31795	5.9044	5.86064	6.93643	9.78261	6.50607	6.17398	6.00583
5q31.2	NM_005733	10112	KIF20A	kinesin family member 20A	1.28361	0.360205	2.63246e-06	0.000158233	4.42072	6.1618	8.71889	6.81486	8.93977	9.25138	3.25285	11.4389	10.5265	7.20592	8.24097	3.45741	6.22973	4.57047	11.9927	11.7873	5.22667	12.7763	20.7346	13.9751	5.6474	6.23396	4.40017	4.45747	6.02347	3.35293	14.8363	13.4318	14.3025	1.97431	1.85939	1.87128	9.84315	9.30183	9.6472	6.17626	5.23972	4.76589	6.6895	7.11479	6.95264
5q33.1	NM_005617	6208	RPS14	ribosomal protein S14	1.08675	0.120021	2.74699e-06	0.000164129	1828.4	2545.55	1600.67	2106.02	1782.05	1210.3	1756.1	2699.78	1997.53	904.392	2353.24	825.375	965.443	2067.1	2317.97	1957.26	831.333	2308.84	2027	1867.43	1329.87	1991.8	1156.95	1575.43	1569.77	1403.64	1059	1340.5	1327.16	799.472	718.788	711.586	1109.44	932.679	982.484	867.424	1228.83	909.223	1474.14	1653.11	1708.11
7q21.11	NR_038343	100505881	MAGI2-AS3	MAGI2 antisense RNA 3	0.640878	-0.641877	2.80511e-06	0.000166603	0.722085	2.65026	2.68875	1.64269	1.63432	2.19806	1.06221	0.483571	1.05465	3.48672	0.806098	1.18671	1.26755	0.520398	2.1388	2.77502	1.29601	1.26786	0.701506	0.697276	0.829745	1.29579	3.14233	2.57604	2.77099	1.87819	3.84051	3.30779	4.43817	2.25397	1.89261	2.04394	4.72247	6.07987	6.24146	2.20634	1.81844	3.15672	3.78505	3.13037	2.88427
6p22.2	NM_003524	8345	HIST1H2BH	histone cluster 1, H2bh	1.09946	0.136795	2.85776e-06	0.000166753	360.225	192.722	335.576	396.682	252.58	205.213	126.216	479.068	342.876	227.939	367.543	126.583	156.01	453.063	335.991	281.905	94.2114	409.125	361.711	283.646	187.449	236.111	78.0688	168.457	189.271	148.758	123.988	160.063	152.315	74.993	62.8113	68.4701	144.045	127.405	121.708	143.277	201.599	94.3201	139.456	174.167	189.008
6p22.1	NM_003533	8354	HIST1H3I	histone cluster 1, H3i	1.12092	0.164678	2.83949e-06	0.000166753	273.709	231.452	233.971	262.739	96.6648	90.6447	133.038	510.031	259.889	159.163	245.646	85.0038	80.8427	404.512	201.976	158.658	82.4449	235.87	248.568	320.298	211.559	192.845	55.3995	113.762	123.82	113.187	199.102	217.437	171.472	32.6499	28.4606	34.5995	114.63	83.7003	99.6732	68.2215	102.616	58.709	112.656	166.497	204.211
6q23.2	NM_004830	9439	MED23	mediator complex subunit 23	0.715108	-0.483767	2.8541e-06	0.000166753	1.17986	3.16988	2.26808	2.19	2.76119	3.12795	1.32289	2.12897	2.59133	5.61306	1.63962	2.80187	3.14488	0.752968	3.24578	3.89178	2.14881	1.55277	2.14999	1.79584	1.59129	3.12622	5.4332	3.788	3.83208	2.62595	5.78423	4.45771	5.11322	3.23984	3.7302	2.87206	4.20462	4.94893	5.08086	3.32718	3.28059	4.95373	4.59499	4.02905	3.75306
Xq28	NM_031462	83692	CD99L2	CD99 molecule-like 2	0.809327	-0.305206	2.8993e-06	0.000167221	17.8898	13.2974	13.2447	6.61887	15.2612	14.6397	14.231	8.53162	16.2206	13.1765	9.30139	7.90885	14.9844	11.2168	15.8766	15.3293	11.4087	14.6935	9.84899	9.07574	15.8894	5.13512	10.4884	21.5898	22.69	20.4186	11.6147	17.4941	10.9186	30.7362	32.0164	31.5409	13.3751	12.8171	13.097	16.4274	13.892	12.4529	14.0741	14.4322	13.6831
14q11.2-q12	NM_004563	5106	PCK2	phosphoenolpyruvate carboxykinase 2 (mitochondrial)	1.53958	0.622539	2.89189e-06	0.000167221	7.82048	13.062	14.5409	14.0908	14.375	11.5248	9.75999	2.45585	21.7634	5.23915	22.9582	2.52935	2.86296	9.25201	13.943	13.0667	3.36756	13.8524	8.75054	7.24522	5.92429	3.41018	20.8131	3.58348	4.40902	3.46646	5.05303	9.60612	7.26231	1.68325	1.64695	1.74404	5.12503	4.89848	5.90869	4.61632	3.80345	3.47512	7.46612	10.3592	10.5403
7p15.3	NM_018947	54205	CYCS	cytochrome c, somatic	0.74789	-0.419103	2.9196e-06	0.000167424	4.19302	8.8296	7.43236	8.54164	7.88012	11.4913	5.67615	10.9751	5.75139	24.1112	5.32825	16.5889	17.328	5.0013	9.71015	12.5716	13.6876	6.34118	7.99988	6.13114	10.1259	23.5005	10.9255	22.5054	23.6119	19.5022	13.1271	21.4965	16.2114	31.0793	29.2745	26.1176	8.98569	9.81049	10.4375	10.8731	14.4005	14.8427	12.7998	11.9594	13.1786
5q35.3	NM_014244	9509	ADAMTS2	ADAM metallopeptidase with thrombospondin type 1 motif, 2	1.826	0.868684	3.05893e-06	0.000173421	3.56766	4.18271	6.10805	4.25108	4.23584	3.30783	3.98735	0.589897	8.17529	1.52413	6.81623	1.4982	2.08932	1.51	5.08504	5.275	2.41836	4.77728	3.19706	3.70396	2.4566	1.17311	6.12113	2.6974	3.47806	2.04132	2.29206	1.85072	1.59706	1.03808	1.11308	1.15147	0.695876	0.689974	0.582265	1.35063	0.958036	1.18061	2.62796	3.93665	2.91692
1p36.33	NR_002946_dup1	8511	MMP23A	matrix metallopeptidase 23A (pseudogene)	1.81534	0.860237	3.04207e-06	0.000173421	3.16151	5.97147	8.92863	8.59367	6.00285	3.22304	5.22358	0.883457	10.9633	0.903342	9.98449	0.489046	0.473449	1.40053	7.28867	5.00552	0.440406	4.08955	4.45113	4.20784	3.24102	1.55806	4.82748	1.33413	2.09424	1.72114	2.44497	2.7925	3.33616	0.262386	0.157526	0.39555	1.20516	1.324	1.28038	0.931259	0.831318	1.25567	4.49589	5.10904	4.71615
4p13	NM_004181	7345	UCHL1	ubiquitin carboxyl-terminal esterase L1 (ubiquitin thiolesterase)	0.920824	-0.119002	3.1329e-06	0.00017661	229.182	203.6	116.601	119.173	159.271	165.956	283.141	121.292	133.539	201.548	102.367	234.802	266.005	230.279	128.078	123.398	226.348	136.555	110.227	89.289	331.327	587.614	113.88	198.129	201.787	227.55	133.376	267.019	155.152	495.517	489.381	475.072	108.779	95.997	104.066	264.353	358.802	261.054	172.695	190.801	205.498
21q22.12-q22.13	NM_005441	8208	CHAF1B	chromatin assembly factor 1, subunit B (p60)	1.30245	0.381224	3.31583e-06	0.000184834	2.04921	3.10114	3.78448	3.10059	3.63909	3.18008	2.31423	4.14793	3.43104	4.47197	2.02027	1.31472	2.7988	2.11983	4.58169	5.24352	2.34331	4.34009	5.12085	4.29935	3.04393	2.06553	2.78051	3.37746	4.42215	2.66601	4.52684	5.39389	3.75	2.26948	2.49117	1.92612	2.70527	2.30378	1.98759	2.54223	1.96525	2.15861	2.76484	2.56785	2.81806
8q21.13	NM_001033723	619279	ZNF704	zinc finger protein 704	0.794703	-0.331513	3.3e-06	0.000184834	2.2644	4.6504	2.86766	1.89466	3.37145	5.6017	4.06586	1.96857	3.95405	5.45631	2.18684	2.45329	3.95714	1.43755	3.24995	4.27172	4.98783	3.46709	2.8661	2.74734	3.14871	2.88431	2.69652	3.30496	4.66159	3.20807	5.25059	5.22346	5.64737	6.97041	7.26077	6.66403	4.91501	5.33964	4.09789	5.47788	3.96248	5.40832	5.85325	4.58394	4.69055
10q21.3	NM_012207	3189	HNRNPH3	heterogeneous nuclear ribonucleoprotein H3 (2H9)	0.594521	-0.750201	3.47592e-06	0.000190564	1.25882	7.76064	5.33879	3.27829	5.06141	8.753	2.71815	13.0869	4.77508	13.2248	4.78469	4.54684	4.22342	5.51043	14.5646	9.82048	9.96503	9.16261	14.2953	4.80386	7.13812	4.61276	9.64625	17.0648	16.4375	9.80752	23.2218	15.2314	23.6594	16.7637	18.3935	18.6446	24.2762	18.7878	22.274	8.86293	7.69484	19.7562	12.3955	14.275	13.7157
6p12.2	NM_002388	4172	MCM3	minichromosome maintenance complex component 3	1.18335	0.242883	3.46104e-06	0.000190564	7.09985	12.1179	21.7229	11.8376	16.632	15.8169	7.7998	12.2354	19.0796	16.9559	13.1978	5.53645	11.934	9.63646	21.709	23.1498	8.06862	26.4841	25.8938	19.2723	9.89438	9.86397	16.2006	12.2734	18.2063	12.3728	17.7678	22.9354	20.9138	6.59955	6.5358	6.77579	14.8328	14.2471	13.6778	9.90122	8.77081	6.81171	10.6334	11.3165	12.4846
2p22.2	NM_005813	23683	PRKD3	protein kinase D3	1.18393	0.243586	3.44121e-06	0.000190564	2.02458	6.15028	5.52955	5.52955	7.57197	8.21537	2.39764	3.14126	4.53217	5.62325	3.8983	2.64726	3.63086	1.27195	8.33592	8.02383	3.1675	7.44592	7.05422	5.20222	3.06453	5.64411	9.13035	4.39573	4.33001	2.8491	6.51206	5.70543	7.75612	2.21528	2.41943	2.06382	5.85507	6.01641	5.65043	3.89465	3.10903	4.45533	5.80733	5.09669	4.79983
20q13.13	NM_002237	3755	KCNG1	potassium voltage-gated channel, subfamily G, member 1	1.73726	0.796816	3.6061e-06	0.000196621	5.64377	16.5279	8.87465	6.5976	6.86202	5.56367	6.18328	6.3497	13.7295	8.03453	10.0837	12.6331	12.5721	13.2336	8.17801	7.72629	13.4004	6.67904	8.93099	10.47	5.93792	2.34269	6.75759	9.77777	8.66564	10.0764	1.00544	2.33027	1.65337	3.61762	3.58762	4.20129	2.88339	2.10895	3.10895	5.28629	4.58601	4.26996	3.27607	4.11861	5.27832
1q32.1	NM_004433	1999	ELF3	E74-like factor 3 (ets domain transcription factor, epithelial-specific )	2.03308	1.02367	3.77714e-06	0.00020476	0.918707	1.30362	12.7473	8.58205	8.69841	5.04475	3.09904	0.103027	10.3807	0.19792	7.65956	0.147902	0.201346	0.239483	6.86967	5.80251	0.155916	7.50753	7.86301	8.89743	0.261755	0.226157	17.5856	1.78701	2.7115	2.00597	2.19851	1.87045	1.56789	0.014462	0.029486	0	1.47157	2.00456	2.15294	0.643007	0.418268	0.401072	2.41274	3.53974	3.18361
7q11.23	NM_004603	6804	STX1A	syntaxin 1A (brain)	0.780183	-0.358115	3.7964e-06	0.00020476	6.05912	3.82846	3.42692	2.63249	3.36734	3.90926	6.8773	3.79403	4.64002	6.89193	2.84269	8.67701	13.65	4.86524	3.01924	3.78214	12.8865	2.99281	3.55908	3.42664	6.05448	5.02588	3.03667	8.04726	11.0294	10.8551	3.58486	5.78719	3.88456	12.5255	15.1751	15.2653	8.85772	7.80576	8.54528	7.60514	7.17942	7.01254	5.3257	5.59881	6.45175
11q21	NR_002569	619383	SCARNA9	small Cajal body-specific RNA 9	0.77613	-0.36563	3.86662e-06	0.000207426	38.1087	33.901	27.3008	43.3281	37.1929	27.4195	34.1847	37.5341	11.5208	155.274	22.5643	147.484	135.452	83.4011	97.0395	80.9542	68.157	33.2762	85.3302	59.8675	26.9937	56.3756	71.8356	109.855	96.7617	122.225	107.707	100.156	127.086	109.949	144.884	125.381	107.283	135.754	144.436	123.988	76.5868	100.157	122.189	137.467	123.915
2q37.1	NM_152879	8527	DGKD	diacylglycerol kinase, delta 130kDa	0.821494	-0.283678	3.92648e-06	0.00020951	10.5943	8.70528	7.46154	5.36408	6.16445	6.48769	15.9647	3.75919	6.58078	5.60238	5.1867	8.09281	9.13922	5.91715	6.39327	5.67017	9.52351	7.9548	6.75638	6.93917	7.44354	2.77867	7.37021	7.12097	7.81512	8.37273	5.38571	6.11395	5.43448	13.6403	15.0074	15.9681	8.38427	7.69861	7.51542	8.93452	7.73657	6.65767	8.25129	8.19763	8.7655
12p13.31	NM_014865	9918	NCAPD2	non-SMC condensin I complex, subunit D2	1.1255	0.170565	3.97923e-06	0.000211195	9.63201	12.0599	15.5116	10.0717	15.5088	15.2543	10.4345	24.1669	16.4795	17.2639	11.0712	6.93708	10.7472	9.56447	20.5258	22.3706	13.6109	29.8254	35.3892	29.4562	11.384	6.05901	13.5821	8.91119	13.0015	8.66779	22.7784	24.1798	20.6564	6.26846	5.88622	5.79993	16.7471	15.3066	15.3212	13.6044	10.1071	9.21864	12.629	13.3805	13.5863
21q22.3	NM_032261	84221	SPATC1L	spermatogenesis and centriole associated 1-like	1.36712	0.451135	4.08566e-06	0.000215697	10.6445	6.75228	9.57544	7.76798	5.53988	3.28035	8.01975	12.2465	7.75505	7.29505	5.78495	5.16597	5.76194	7.83168	8.99743	6.87207	5.7046	10.3544	6.8925	11.0549	10.983	4.1402	4.76489	4.86895	5.42228	5.47254	4.65055	5.81667	4.43985	0.541631	1.14419	1.37985	6.52327	5.23813	6.7208	4.37253	4.72624	4.58649	6.55778	7.23603	7.01779
8q12.1	NM_052898	114786	XKR4	XK, Kell blood group complex subunit-related family, member 4	0.779472	-0.35943	4.1408e-06	0.000217457	4.31517	0.80132	1.17561	0.822375	1.57951	2.6567	2.95293	1.72072	0.707344	3.51303	0.637703	2.85829	4.23916	0.902418	1.31454	1.90174	4.97128	1.48104	2.05856	1.40276	3.74135	4.39812	1.66795	1.22042	2.01058	1.38736	2.7015	4.74222	4.14766	11.0028	12.3739	10.5192	2.30209	2.07745	2.02979	4.29585	4.03082	4.88225	2.95314	2.46306	2.35662
4q27	NM_001237	890	CCNA2	cyclin A2	1.22471	0.292445	4.20317e-06	0.000217622	3.42476	8.00797	14.8473	16.0877	10.9942	10.9625	2.51707	20.1246	7.62712	15.3358	5.91313	8.95329	9.77781	4.14908	12.1803	17.5564	7.98737	16.4017	26.2482	18.1399	3.88014	6.67755	6.11104	7.02079	10.0012	6.18188	16.7072	23.5298	14.6907	3.89067	2.81762	2.59102	8.21972	9.52184	10.0569	6.14854	9.09682	6.78129	8.16356	8.57896	8.47379
7q21.12	NM_003130	6717	SRI	sorcin	0.754295	-0.406799	4.19366e-06	0.000217622	6.45457	10.6508	5.51966	7.78501	5.89212	9.18197	7.50988	7.40055	3.06618	16.6877	4.42895	11.0785	12.4034	5.12159	9.58587	11.4258	9.40747	9.22202	7.62638	6.96221	6.96764	16.7852	7.24185	15.9753	14.3266	11.8112	11.3465	18.2583	15.2935	13.7042	12.1206	10.7654	8.80183	10.6849	11.2413	10.0216	14.1626	12.5943	12.3821	11.508	12.1005
12q24.3	NM_021009	7316	UBC	ubiquitin C	0.975251	-0.0361548	4.20936e-06	0.000217622	636.556	518.075	442.514	362.142	414.462	332.951	660.001	593.524	464.719	287.607	417.513	364.97	432.814	528.493	537.929	489.905	385.466	515.355	432.826	353.54	536.678	750.932	463.214	420.569	455.668	469.05	359.262	394.02	353.187	511.172	487.499	540.632	365.748	295.814	372.054	412.843	566.638	408.56	373.319	401.609	460.34
2p22.2-p22.1	NM_001135673	64225	ATL2	atlastin GTPase 2	1.14924	0.200685	4.23778e-06	0.000217962	1.55057	6.03276	7.9532	10.6862	7.22489	7.39628	2.47657	4.60023	5.47288	8.83763	3.90695	6.3053	8.10349	1.52571	11.6753	14.0972	5.57981	11.0848	10.5621	7.3426	5.50738	6.13382	14.7929	6.1583	6.39622	4.58953	6.91749	8.57248	11.4522	4.68033	2.55281	2.74494	5.09564	8.34075	6.99158	4.69568	2.32286	5.33192	8.94238	6.52793	6.8232
Xq22.2	NM_152278	56849	TCEAL7	transcription elongation factor A (SII)-like 7	0.640438	-0.642869	4.26709e-06	0.000218344	16.2462	9.622	4.18736	3.55956	10.0632	15.2165	10.2628	13.6105	6.27851	24.4385	4.08242	17.5637	16.2997	10.1402	7.93731	9.83249	13.1317	8.95596	5.12573	4.74812	25.6754	58.7664	6.05817	27.5834	29.7082	32.8492	18.8849	36.3042	21.279	42.7889	39.1328	32.705	17.516	18.1327	16.0889	19.0571	28.3092	24.0294	20.7224	20.0532	21.4025
6q21	NM_014028	28962	OSTM1	osteopetrosis associated transmembrane protein 1	0.775999	-0.365873	4.29953e-06	0.000218881	2.06503	2.3122	3.94523	3.83755	3.09431	3.4986	2.29273	1.90256	1.90966	5.11596	2.10549	3.90312	3.82916	1.36451	3.39983	4.58247	4.02815	3.18271	3.60292	3.08419	2.53336	4.08838	7.18961	5.48303	5.84573	5.06551	4.47474	5.4023	4.10604	5.18482	4.82866	4.14433	6.29974	6.8688	8.2708	2.90541	4.30311	4.31811	5.0063	3.83939	3.89285
15q22.2	NM_016530	51762	RAB8B	RAB8B, member RAS oncogene family	0.722194	-0.469541	4.34703e-06	0.000219064	4.90148	10.7099	9.08919	9.27044	8.48101	11.6479	5.55984	7.14853	5.26294	22.2589	4.10536	11.8496	13.8416	2.83306	11.9687	14.9606	12.7436	7.21689	6.85062	5.50823	6.4708	14.2716	10.7938	17.1077	14.2766	11.4999	12.8157	18.8063	18.3367	15.9693	14.4162	12.1601	8.63897	10.1942	10.7328	10.4933	11.3576	15.2433	21.2565	17.3232	17.4559
12q12-q14	NM_005412	6472	SHMT2	serine hydroxymethyltransferase 2 (mitochondrial)	1.11649	0.158974	4.33226e-06	0.000219064	42.3995	36.4858	40.5683	36.0495	43.1845	34.5834	30.9196	38.2289	43.3766	27.8434	49.9489	28.6548	32.6927	39.9218	57.0873	53.3265	31.3757	55.9065	46.1804	35.329	31.4187	17.5283	43.2413	35.8499	31.6837	28.767	29.0156	27.8384	22.8474	18.8719	17.4571	14.2421	23.0528	22.4424	26.5042	28.3109	28.6662	25.9003	32.6856	39.3527	43.334
11q21	NM_024116	79101	TAF1D	TATA box binding protein (TBP)-associated factor, RNA polymerase I, D, 41kDa	1.24347	0.314367	4.62511e-06	0.000231906	1.46053	9.65741	10.4332	10.1822	10.2405	10.3221	4.09967	13.8902	5.1379	12.7285	5.04058	6.80057	7.32266	3.97285	16.6052	15.534	10.8339	13.5107	24.1131	19.9675	5.30377	5.56348	19.2377	9.99634	7.36921	7.45528	11.812	7.39361	9.18179	5.65642	5.27847	4.74251	7.50518	8.18039	8.53445	4.2263	3.72224	7.33111	10.4409	9.47538	9.71124
12q14	NM_020841	114882	OSBPL8	oxysterol binding protein-like 8	0.700466	-0.513613	4.68604e-06	0.000232898	2.04505	2.84401	4.8716	2.96317	2.86335	3.18105	3.55189	6.52875	3.00126	10.8171	1.38376	7.46371	10.4073	2.50896	2.67703	4.63507	8.41287	4.39102	4.24538	5.34409	4.2699	10.1309	5.78086	9.06765	8.02737	7.89677	5.01909	8.01897	8.16821	12.362	11.4612	14.4101	4.64228	4.67367	4.78798	8.3086	8.28524	9.26532	7.35515	5.51928	8.12792
1p35.2	NM_178865	347735	SERINC2	serine incorporator 2	1.57796	0.658064	4.69157e-06	0.000232898	14.4653	18.2325	13.472	10.2476	9.1765	6.93807	11.722	9.50273	14.1438	9.1054	7.22352	7.70127	8.82012	6.92185	8.29825	9.89757	9.36614	13.1095	7.98178	9.64794	15.0761	4.02096	25.3108	7.21342	7.02788	6.44398	4.90213	5.16953	5.60357	3.46849	2.90042	2.72597	4.50943	1.88271	3.43634	6.20413	6.94709	6.36083	4.96462	4.08563	7.15723
3p21.31	NM_032316	84276	NICN1	nicolin 1	0.91447	-0.128993	4.87262e-06	0.000240688	5.80868	4.07151	3.40562	4.48121	3.17686	2.71016	5.31704	2.76257	3.34101	4.6299	3.30826	4.68805	5.45689	4.50877	4.66676	4.20817	5.51394	4.11723	3.55118	3.48248	5.88727	4.53342	5.01697	3.97356	4.25897	4.47036	3.84487	4.70104	4.30477	6.5746	6.76312	6.68871	3.89493	4.02031	4.03865	6.03429	5.05995	4.70209	4.25546	4.87743	4.53426
3p25.1	NM_004844	9467	SH3BP5	SH3-domain binding protein 5 (BTK-associated)	0.858439	-0.220212	4.901e-06	0.000240897	2.23913	2.77885	1.93203	1.31396	2.66808	2.57359	3.29557	0.907178	3.21865	2.30765	1.47094	2.04401	3.63506	0.803041	2.21545	3.30251	3.52155	2.03526	2.04341	1.91713	2.85366	2.45031	3.33107	2.17242	3.18981	2.4099	1.94821	2.70518	2.74608	7.89255	7.11817	8.08023	3.32242	2.9429	3.37015	2.73239	3.26742	2.70495	4.76699	3.49754	3.249
12q21.31	NM_182767	55117	SLC6A15	solute carrier family 6 (neutral amino acid transporter), member 15	0.683491	-0.549005	5.0089e-06	0.000244994	1.3999	1.37115	1.36221	1.14877	1.16602	1.70414	2.04535	1.54489	0.874285	7.86431	0.936952	9.60712	12.9433	1.23158	2.12848	2.87335	11.1649	1.27615	1.22107	0.742423	1.63403	3.18075	1.56035	3.62493	3.46158	3.04843	3.10002	3.22474	3.96927	5.70189	5.59856	4.23031	2.96478	3.52292	3.75485	2.62218	2.59833	3.30797	6.42347	4.57651	4.7102
11p14.3	NM_022725	2188	FANCF	Fanconi anemia, complementation group F	0.807848	-0.307844	5.4466e-06	0.000265103	5.4488	5.19868	4.6195	5.15505	3.33137	4.28791	5.05404	2.89267	2.81897	6.90185	2.63508	5.68545	6.4118	4.777	4.89854	6.05399	5.44217	6.04795	5.801	3.88465	3.28682	3.56246	3.27156	7.03007	6.54949	8.62264	5.30975	7.46059	4.76011	6.943	6.98254	7.02696	5.35031	4.76245	5.23685	5.96044	8.076	6.81784	5.74043	5.21659	5.36253
5p12	NR_073113	100652772	NNT-AS1	NNT antisense RNA 1	0.820945	-0.284643	5.47789e-06	0.000265332	1.69293	2.96822	1.47416	1.04572	2.31243	2.86649	1.92206	1.75788	1.26422	3.80207	1.43438	2.19378	3.39275	1.85438	1.51226	2.22014	2.84665	2.38011	1.8278	1.644	1.59292	2.06952	2.01288	2.9808	3.03021	3.35063	3.11817	3.4726	3.24524	3.4426	3.5248	3.84751	3.99715	3.44581	3.74132	3.2813	3.57966	2.74267	3.14067	2.56596	2.34537
Xq28	NM_000202	3423	IDS	iduronate 2-sulfatase	0.741591	-0.431304	5.52121e-06	0.000266138	4.25701	15.338	7.74512	6.43722	8.7624	10.9082	14.9242	10.8446	5.09843	18.0345	4.25632	21.2035	23.1231	4.45773	8.25419	7.62756	35.8722	9.53756	7.19594	8.23959	12.2043	9.24461	13.7347	20.1106	20.6309	19.4029	11.0074	12.9615	13.0146	33.824	36.1502	39.1415	10.5233	9.35452	10.6568	20.7023	22.1897	20.4705	14.575	14.621	15.0468
Xq28	NM_001017980	203547	VMA21	VMA21 vacuolar H+-ATPase homolog (S. cerevisiae)	0.772994	-0.371471	5.81542e-06	0.000278972	7.28478	12.3138	13.2692	12.7551	11.3836	15.267	7.07575	7.92491	6.14719	23.6382	4.92998	17.3751	18.1314	6.10402	10.1934	16.6124	15.1817	10.4478	10.3465	7.29736	8.1271	14.7789	13.3079	19.1755	22.3171	21.6443	15.9416	20.7766	13.8067	25.6848	26.408	22.609	13.009	12.6557	13.1884	15.8824	21.366	18.7512	15.9084	13.5216	13.905
Xq11.1	NM_001012968	139886	SPIN4	spindlin family, member 4	0.745911	-0.422924	6.0347e-06	0.000288106	1.11641	3.14035	3.11373	2.18453	2.36182	2.66396	1.19626	1.34749	1.8121	2.89705	0.958848	1.2444	1.84548	0.698411	2.18688	3.13329	1.56097	2.91685	3.24838	2.50923	1.09862	1.07849	4.05776	3.13711	3.54969	2.98516	3.22389	4.32514	3.18554	3.30743	2.79264	3.21016	3.68624	3.6242	3.42783	3.37158	4.10716	2.92443	3.95066	3.72635	3.2748
17q12	NM_032351	84311	MRPL45	mitochondrial ribosomal protein L45	1.16005	0.214192	6.35575e-06	0.000301989	6.72445	12.5107	20.8263	22.8598	14.1846	14.9137	5.5847	19.78	14.7962	11.5312	13.2088	8.39876	10.8842	8.29928	17.504	17.4839	8.16409	20.7881	21.2038	15.4057	7.851	14.3124	19.6028	9.87489	10.832	9.94914	12.2622	11.4054	13.3886	8.70931	8.85912	7.58582	13.3279	12.8142	14.7647	7.28508	10.9028	8.15784	10.722	11.3527	11.0089
11q13.1	NM_080668	113130	CDCA5	cell division cycle associated 5	1.41369	0.499461	6.67716e-06	0.000307026	3.44961	3.66872	7.19234	8.41582	5.45506	4.92796	2.74807	6.13715	5.20228	6.64002	3.19037	3.33898	5.22523	5.67123	6.67871	7.27058	3.70132	10.7548	14.945	11.9633	2.6705	1.48623	2.68172	4.12297	5.17847	3.80878	6.58544	10.6453	6.49646	2.2051	1.87518	2.03534	4.31624	3.61421	3.74836	4.1479	4.01389	2.98584	4.09019	4.18823	3.42659
2q33.1	NM_003507	8324	FZD7	frizzled family receptor 7	1.23117	0.300029	6.64157e-06	0.000307026	13.3956	14.2225	12.3757	12.2842	9.54718	10.5886	8.43045	20.5561	13.7217	13.881	9.31847	8.27196	9.9681	9.69646	15.0741	16.1241	9.75702	25.5536	29.4211	23.029	6.48423	4.55845	9.14868	9.37689	10.764	11.0329	8.54183	9.67988	11.9738	5.06612	4.92018	5.64867	11.7849	10.6961	13.0107	7.47104	7.95236	6.64369	7.41421	7.0621	8.11114
22q12.3	NM_006739	4174	MCM5	minichromosome maintenance complex component 5	1.3071	0.386368	6.60325e-06	0.000307026	14.1187	16.3858	23.25	19.2119	14.1453	12.0653	9.57607	11.0995	19.6276	13.6945	15.8686	7.62232	8.98539	18.3272	21.5745	21.2996	7.60641	24.3694	21.1984	17.376	9.60388	2.96284	8.73286	13.6376	15.1055	11.2776	12.8572	18.4681	10.9112	4.62914	4.5165	4.57526	11.5486	7.63846	8.02629	9.37119	9.92629	5.94839	8.91911	11.5218	10.9758
2q11.2	NM_145212	51263	MRPL30	mitochondrial ribosomal protein L30	1.14689	0.197732	6.5619e-06	0.000307026	5.12731	7.52133	12.7149	13.335	9.40125	8.84612	5.56466	12.1652	6.07564	11.0725	6.97219	8.10858	10.4492	4.11472	11.048	13.2323	8.80889	11.0757	10.937	10.5911	8.60977	13.8814	9.20772	8.43058	10.21	8.71058	8.19307	10.8769	9.60332	7.55481	7.75002	6.73754	5.90749	7.04152	7.00921	5.15144	7.1422	6.82974	8.37177	7.5701	7.89221
3p21.1	NM_003157	6787	NEK4	NIMA-related kinase 4	0.806187	-0.310813	6.53087e-06	0.000307026	2.88694	4.06012	4.30005	2.92777	4.46517	6.04523	3.38959	6.50844	3.41997	9.43223	2.60562	4.09545	7.85343	2.74614	5.13853	6.75579	6.69488	6.31634	7.13227	5.34136	3.71448	5.56742	5.92114	6.86784	7.86439	7.42199	9.22436	7.8009	6.95625	10.4939	9.82601	8.7148	5.95029	6.82238	6.48545	6.73279	6.27775	6.58022	7.29001	6.00488	6.2653
17q24.2	NM_002734	5573	PRKAR1A	protein kinase, cAMP-dependent, regulatory, type I, alpha	0.765963	-0.384653	6.58864e-06	0.000307026	9.64482	29.7668	17.4426	14.4045	20.7045	28.2582	13.7214	13.4726	16.2969	36.4848	11.3459	9.7503	24.1006	4.37675	24.36	24.2851	16.4203	16.5586	13.0883	11.9301	13.2778	23.9971	43.1593	23.2673	26.6578	20.1818	34.2739	33.6178	40.842	29.0671	30.0894	30.9466	23.5124	24.38	26.5181	18.4627	21.4382	25.8396	37.1639	35.812	34.1678
4p14	NM_015173	23216	TBC1D1	TBC1 (tre-2/USP6, BUB2, cdc16) domain family, member 1	1.2888	0.366033	6.65803e-06	0.000307026	3.49767	7.12544	12.4734	10.6547	9.26174	8.21026	4.97734	3.67019	9.84042	5.97226	5.47235	3.76539	5.48727	2.17001	10.034	11.9757	4.96824	12.714	12.1301	11.1246	4.03641	3.64388	23.4088	5.46336	6.02208	5.01062	9.10763	4.60506	7.89603	2.31551	1.74464	1.87049	6.41264	7.31998	7.67772	3.57566	2.85132	2.98785	8.98852	6.29246	6.45745
13q14.13	NR_024458	100190939	TPT1-AS1	TPT1 antisense RNA 1	1.22046	0.287424	6.7213e-06	0.000307638	7.07598	6.18417	7.00028	5.17847	7.37052	6.40062	6.71486	7.1282	5.68755	6.45394	3.59116	4.39466	4.75796	5.41464	5.84927	5.55331	6.67335	8.49332	7.69867	8.39823	6.38272	4.39841	5.75017	4.32002	4.9442	4.74403	5.05322	5.83388	4.09509	2.96903	2.93207	2.86199	3.79356	4.82314	4.27015	5.25732	5.41103	5.25631	5.85216	5.66184	5.94679
Xq28	NM_006013	6134	RPL10	ribosomal protein L10	1.05195	0.0730643	6.9709e-06	0.000317605	583.392	792.727	590.964	721.084	691.736	498.354	514.332	760.429	837.236	261.467	840.457	243.552	280.179	499.072	762.918	609.844	254.912	753.67	639.277	576.747	537.133	498.315	419.943	428.349	420.059	380.69	310.461	430.541	349.664	183.562	162.249	160.006	290.704	239.8	257.372	280.611	361.729	316.626	442.984	500.572	537.923
16p13.2	NM_001127448	18	ABAT	4-aminobutyrate aminotransferase	0.534116	-0.904775	7.14851e-06	0.000320419	6.75205	8.81846	5.67849	3.93356	3.54951	3.97192	7.37684	5.29272	3.17954	10.2339	1.16938	2.14252	2.56242	3.03444	6.48787	9.56668	2.98931	5.62163	4.56542	4.18422	7.05349	6.19507	3.03125	5.12191	7.35898	3.63521	12.9453	16.6252	20.2443	5.59698	4.15248	7.03108	18.0827	17.9699	16.3923	10.8967	7.87723	7.14627	15.0921	11.7882	12.4655
11q14.2	NM_001814	1075	CTSC	cathepsin C	1.1715	0.228358	7.1526e-06	0.000320419	11.8402	10.5887	24.7164	26.3424	25.1169	20.6156	9.30511	8.89976	26.2962	15.6936	23.6747	9.99492	12.5194	9.25302	29.1222	32.1417	9.15641	28.9828	22.6557	16.0888	6.24679	10.6971	21.0916	15.4795	17.2116	14.1776	25.7299	17.9606	21.227	3.77199	3.82026	3.21681	19.7331	18.3694	21.6538	11.1129	9.94595	7.50438	15.6695	15.2589	16.8479
Xq28	NM_001395	1852	DUSP9	dual specificity phosphatase 9	1.93133	0.949598	7.07438e-06	0.000320419	2.83932	2.70999	13.3372	12.1724	3.61888	2.07109	2.66708	2.39442	3.75249	1.26602	3.79622	2.1468	1.98528	2.22394	3.89111	3.75359	2.23712	5.25007	2.9757	3.75653	2.50496	1.97145	2.78638	2.45945	2.6646	2.48735	1.91475	2.47136	2.187	1.69769	1.36719	1.79419	2.83099	3.10662	2.75456	1.12198	0.923971	0.766079	1.46065	1.55477	1.92835
2q37.1	NM_018410	55355	HJURP	Holliday junction recognition protein	1.40484	0.490401	7.16109e-06	0.000320419	1.43341	3.15932	4.3096	5.05133	3.80161	3.93198	1.38249	8.81791	3.36727	6.81721	2.3045	3.00247	3.77587	2.4095	6.1769	7.0868	3.24454	6.83502	10.2195	8.24609	1.8737	2.59992	2.35667	2.48473	4.25558	3.05781	6.52972	8.45418	7.8813	1.44314	0.862758	1.03897	4.14893	3.69498	3.46463	3.18426	2.62739	2.3235	3.63962	3.26188	3.37272
8q24.3	NM_002346	4061	LY6E	lymphocyte antigen 6 complex, locus E	1.25158	0.323748	7.30345e-06	0.000322451	46.3591	53.3471	67.2604	67.6082	58.8418	49.892	33.6131	10.0873	119.383	15.9521	125.393	18.2302	18.3237	35.7927	92.3412	74.7164	16.6489	54.9716	55.4498	69.5133	22.6108	15.4124	71.3023	34.1874	34.114	28.5621	29.9093	24.9457	30.3059	7.02435	8.57299	8.43653	21.6355	25.2561	28.2954	16.3983	17.3005	10.1691	37.3948	47.7447	51.3416
6p12.2	NM_014051	28978	TMEM14A	transmembrane protein 14A	0.837149	-0.256444	7.26971e-06	0.000322451	15.421	17.4234	13.1701	13.3663	11.599	13.2308	21.3127	11.4155	10.7241	21.1003	12.3049	16.5907	18.393	17.0283	12.2664	12.4097	16.9521	10.3996	12.7326	7.76831	15.0542	27.9105	7.35843	22.5348	20.1118	20.1918	13.7011	17.1801	13.2991	32.4198	31.7757	31.2695	10.6867	9.56339	10.4321	18.3732	27.1712	20.0929	18.973	22.9014	21.0547
3p21.31	NM_018031	11180	WDR6	WD repeat domain 6	0.866517	-0.2067	7.28251e-06	0.000322451	32.5901	31.7602	30.1127	20.5965	21.5871	23.6013	30.2437	19.6765	30.9345	26.0416	26.9096	16.6723	25.3553	25.1798	40.3577	34.3098	23.6853	29.753	26.3442	26.2786	25.7847	10.8494	35.1636	32.1907	34.8303	34.9694	24.7854	31.6313	25.8174	29.7065	31.9017	33.9014	44.8377	42.9015	43.3419	36.8529	27.7956	28.976	36.6094	38.5556	42.5948
9q21.11	NM_138333	116224	FAM122A	family with sequence similarity 122A	0.877532	-0.188476	7.35783e-06	0.00032342	3.49563	4.26413	5.47767	3.82029	3.5168	3.97791	5.40696	2.37882	3.27007	4.58382	2.92412	3.41043	4.40272	2.2345	4.11801	5.38234	3.48117	3.20535	3.16219	2.91737	3.22496	4.8589	5.23422	4.65713	5.07537	5.00412	4.46772	4.36192	4.98516	4.94223	4.9574	5.27557	5.03092	5.04645	5.82158	2.97467	3.10386	3.43294	5.7236	4.5103	5.08551
4q31.1	NM_001153484	60592	SCOC	short coiled-coil protein	0.754615	-0.406187	7.49542e-06	0.000328023	10.6315	24.5573	21.0222	20.5644	18.5576	25.5943	11.0448	17.2296	6.69376	40.4578	9.69712	33.8337	29.0794	6.64703	17.4987	28.3477	29.9305	18.1566	17.2639	17.6559	16.6207	34.5612	30.0489	32.8963	33.2406	32.7233	25.8649	40.151	31.3212	48.9462	48.9948	37.4444	25.5788	26.8467	28.2228	21.6819	39.8378	37.6537	32.6944	31.2433	32.6303
11q13.1	NM_005507	1072	CFL1	cofilin 1 (non-muscle)	0.986284	-0.0199244	7.53657e-06	0.000328384	369.958	291.263	308.263	307.136	251.713	244.003	354.635	390.558	310.794	253.882	285.325	274.546	307.899	381.803	317.344	283.945	259.425	299.153	275.355	273.737	427.292	443.586	271.278	318.002	320.309	301.869	248.963	363.489	262.921	404.48	379.527	406.014	212.314	176.056	191.923	271.754	363.622	257.287	218.886	252.453	296.585
1p33	NM_001441	2166	FAAH	fatty acid amide hydrolase	0.808967	-0.305847	7.66504e-06	0.000332529	5.10353	4.09291	2.05949	1.95191	2.35704	2.18016	7.41643	1.79508	3.00384	2.6957	3.39933	3.71209	4.3581	3.07927	4.31592	3.5309	4.10421	2.21258	1.99052	1.55354	5.45865	3.42231	2.96951	4.68982	4.51809	4.46199	3.26798	2.98273	3.42349	5.84499	5.75217	5.84502	3.42676	2.96299	3.72769	4.5201	3.98258	2.96974	5.27344	6.07911	5.18342
2q31.1	NM_006554	10651	MTX2	metaxin 2	0.852231	-0.230684	7.71128e-06	0.000333087	8.5973	15.3077	18.2844	17.1054	16.9995	16.8807	11.497	18.6774	11.919	17.0833	7.248	11.129	12.8652	8.74137	16.0032	17.6103	13.9248	14.0913	15.2484	11.8155	16.7681	27.0427	19.2357	16.1822	21.8612	17.7584	20.2161	19.9036	16.545	28.3578	24.896	27.5906	17.6466	18.3032	19.4933	14.8396	14.0411	15.5052	19.3485	18.5764	16.6343
13q14.2	NM_000321	5925	RB1	retinoblastoma 1	0.736833	-0.440591	7.75344e-06	0.000333465	4.16061	5.87743	6.21443	6.20523	6.01741	8.59931	4.08775	5.01999	4.08542	9.91691	3.01319	5.06204	6.33769	2.0467	8.73545	11.7315	7.42382	6.90532	8.11366	6.39783	5.43215	9.62974	8.14879	8.80085	7.8198	5.73407	12.9841	10.8589	11.7476	8.15377	6.74949	7.11145	11.4067	13.7407	14.2595	8.05196	9.38595	11.3601	10.6736	9.12133	9.28295
19q13.33	NM_000979	6141	RPL18	ribosomal protein L18	1.07021	0.0978986	7.78838e-06	0.00033353	1029.06	1045.11	1017.64	1085.63	949.012	690.008	862.681	2304.69	1193.03	577.113	1083.84	445.547	481.775	1047.56	1117.77	964.535	482.523	1210.88	1254.9	1307.7	984.681	677.827	722.241	750.379	773.621	725.655	629.067	703.232	607.614	273.808	237.195	241.448	671.417	530.318	624.34	420.329	582.994	460.963	675.406	805.789	922.395
10p14	NM_024693	79746	ECHDC3	enoyl CoA hydratase domain containing 3	1.90352	0.928667	8.04407e-06	0.000343007	13.7831	6.04981	3.79657	4.44805	4.93869	3.32707	12.6415	4.43853	9.17506	4.80332	6.9306	5.93124	4.6966	9.8745	8.26225	6.63528	3.71604	8.58978	3.67883	4.41654	6.69286	3.1566	5.92194	3.55511	2.45298	2.80605	2.702	3.55637	3.80563	1.8286	1.29607	1.25078	4.85549	4.67908	6.4927	1.89957	2.53649	2.15804	6.13711	7.29203	7.36057
17p13.1	NM_004217	9212	AURKB	aurora kinase B	1.38965	0.474724	8.17926e-06	0.000347288	9.76593	7.90991	15.0415	12.7364	8.23159	8.01613	3.8649	28.0144	6.95964	15.0769	7.94867	7.43158	8.99075	16.3421	14.4874	14.8306	8.25282	20.8353	26.5892	25.6658	8.10185	5.53327	2.90911	6.16989	9.97637	6.93938	15.9208	19.9756	13.5101	2.33043	1.70373	2.16252	8.73549	8.33505	7.82716	7.72711	9.71607	4.05522	6.35149	9.01693	7.93799
18q11.2	NM_138340	171586	ABHD3	abhydrolase domain containing 3	0.763805	-0.388723	8.2245e-06	0.000347729	1.72888	1.49753	2.81454	2.82448	2.29404	2.61238	1.5074	2.30703	1.66493	3.43069	0.875462	2.27111	3.37175	1.61135	3.11151	3.47014	2.88475	2.32222	2.43561	2.16499	2.16053	2.06328	3.40492	3.40992	3.32689	3.8679	3.6649	2.73114	2.68417	3.09538	2.77277	2.89262	2.93844	2.77604	3.0005	3.89397	3.49246	3.23362	2.74855	2.55126	2.60443
16q23.3	NM_019065	54550	NECAB2	N-terminal EF-hand calcium binding protein 2	0.631889	-0.662257	8.34524e-06	0.000350522	18.1158	9.87099	3.51065	4.93555	3.19413	3.56768	23.4341	6.70106	2.18689	6.03188	2.14796	7.14018	7.18448	11.922	6.01964	3.01239	8.54558	4.31568	3.9632	5.15404	16.5943	6.67846	1.07087	4.33624	4.81541	4.12948	5.01801	17.0677	5.89907	17.6053	16.1003	16.1198	14.7161	11.4979	12.9384	12.857	16.3676	14.0666	17.1777	17.5412	23.2464
10q24.31	NR_002954	677800	SNORA12	small nucleolar RNA, H/ACA box 12	0.885696	-0.175116	8.36082e-06	0.000350522	246.805	57.5955	94.7476	193.925	401.161	331.528	205.598	112.577	100.024	266.768	223.618	273.882	211.337	546.474	175.424	216.6	111.004	219.258	190.887	223.358	320.895	171.73	142.789	440.079	300.413	266.734	485.922	500.62	281.451	325.105	305.232	350.429	392.812	372.409	396.983	264.454	169.522	252.191	377.489	334.739	249.15
1p13.3	NM_020703	57463	AMIGO1	adhesion molecule with Ig-like domain 1	0.933796	-0.0988213	8.6198e-06	0.000353944	2.81841	2.15771	1.50753	1.36847	1.55764	2.01695	2.97628	1.1945	1.31636	3.09879	0.624096	2.44323	3.01378	1.77082	1.51376	1.5917	3.49629	1.94461	1.63366	1.33964	2.88783	2.18507	1.01958	1.37288	1.56298	1.70269	2.09858	2.57195	2.07328	4.16112	4.2064	5.72383	2.92862	2.57721	3.29491	2.88252	2.58219	2.96913	2.76061	2.15151	2.16908
16q24.3	NM_030928	81620	CDT1	chromatin licensing and DNA replication factor 1	1.52398	0.607844	8.58411e-06	0.000353944	6.46052	7.14219	9.06172	8.85292	4.65299	3.70731	4.97086	14.5175	7.94532	6.59393	7.45645	3.44113	3.88376	8.93323	7.29615	6.53649	4.79621	14.4467	15.0466	17.448	3.6272	2.14149	2.75156	3.78959	4.47505	5.02118	3.8561	6.18134	4.58591	1.4982	1.504	1.23178	3.54214	3.03756	2.7291	3.73131	3.97965	2.12215	4.40676	4.20904	5.9783
5p13.2	NM_153485	9631	NUP155	nucleoporin 155kDa	1.18444	0.244208	8.58504e-06	0.000353944	3.55049	6.06774	8.62207	8.35481	8.08655	9.55587	3.86224	8.32593	5.3809	11.6087	4.8231	5.71606	9.20468	3.18022	9.19417	11.0521	7.48829	11.234	13.2234	9.31075	4.93408	9.22563	10.8624	8.45789	8.42563	6.19124	9.2147	8.75598	10.3794	6.02854	4.52901	5.3374	6.56602	6.45556	6.254	4.10266	3.7121	5.96512	7.68674	6.61113	6.49747
6p11.2	NM_000947	5558	PRIM2	primase, DNA, polypeptide 2 (58kDa)	1.29854	0.376895	8.59739e-06	0.000353944	2.12363	3.49558	4.93891	7.67659	4.98034	5.6204	1.62921	3.98451	3.60131	6.77263	3.42895	3.17983	4.93358	2.60954	6.7397	7.19355	3.79374	6.59504	8.42093	6.21709	3.34308	6.85272	5.81157	3.09913	3.76206	2.65791	6.3999	5.52135	6.27977	3.62222	3.61587	2.76464	3.08184	2.54538	2.69148	2.7437	2.88731	3.58067	5.20877	4.34204	4.05733
14q11.2	NM_138376	91875	TTC5	tetratricopeptide repeat domain 5	0.845971	-0.24132	8.58486e-06	0.000353944	12.0771	10.503	7.32969	4.81393	6.62731	8.30636	11.1149	7.30537	9.44263	8.598	6.70935	6.14497	10.5929	8.1082	10.0457	10.2614	8.53422	9.58766	7.83343	6.13927	8.86563	14.4194	6.78597	7.6154	8.62806	8.34258	10.4903	11.0591	10.5522	11.2627	9.78068	10.5272	9.88564	10.8258	10.393	8.39084	9.54823	7.90896	12.0378	14.5246	11.6705
Xp22.11	NM_030624	80311	KLHL15	kelch-like family member 15	0.677571	-0.561556	8.80803e-06	0.000360057	1.60306	3.70708	2.56966	2.45463	2.41198	3.58858	1.67364	3.90468	2.36669	4.83529	1.48323	1.94519	3.53349	0.888388	3.46931	4.56398	2.99579	3.07007	3.80135	2.96481	2.64054	5.00546	3.83494	9.25551	9.12318	7.34009	4.82321	4.18808	4.77183	6.63526	7.54747	6.72136	3.25076	3.73873	3.64638	3.3818	3.44786	4.37485	5.20432	3.93476	4.00028
9q33.3	NR_026677	81571	MIR600HG	MIR600 host gene (non-protein coding)	0.864743	-0.209656	8.84093e-06	0.000360057	1.35877	1.58711	1.10457	0.579073	1.22766	1.99246	3.01141	0.985442	1.23112	2.91951	0.674155	1.24827	3.1685	1.05524	1.52106	1.89396	3.39651	2.33034	1.6914	1.30453	2.16088	0.866461	1.36351	1.11514	1.81097	1.62223	1.24294	2.16955	2.0953	5.22243	5.99358	5.74125	2.09806	2.47409	1.67224	4.08852	1.73022	2.25676	1.95328	2.11626	1.88322
19q13.2	NM_017827	54938	SARS2	seryl-tRNA synthetase 2, mitochondrial	1.3853	0.470197	8.87694e-06	0.000360057	7.59755	8.75865	9.98521	10.6574	7.33981	5.37104	6.51771	13.1845	8.97233	5.42238	10.1535	4.63131	4.5552	8.75688	11.0277	8.93536	3.86802	11.272	8.52628	8.45641	7.08401	3.90101	6.86659	3.34115	4.02482	3.47688	4.39222	7.37238	5.78121	3.33173	3.22241	3.54752	4.94663	3.84477	4.04155	5.70378	5.66151	4.41542	5.81475	6.07042	6.82497
1p22.1	NM_001938	1810	DR1	down-regulator of transcription 1, TBP-binding (negative cofactor 2)	0.814093	-0.296734	9.12791e-06	0.000365776	7.14586	15.1799	12.6303	11.4871	12.6641	15.941	9.22568	12.2887	9.9527	19.1206	7.08674	12.5655	12.1056	5.7673	10.0277	12.6818	13.4406	12.7472	13.868	12.3491	7.66738	9.75362	15.0176	13.9691	16.5385	15.278	16.4043	18.3972	15.1888	22.131	22.0318	17.4397	14.4762	15.7453	15.948	12.2588	17.2376	15.3959	20.4162	14.8074	14.6085
19q13.2	NM_001436	2091	FBL	fibrillarin	1.13274	0.179811	9.06068e-06	0.000365776	73.1836	58.594	53.6404	49.2226	58.8374	51.697	72.4215	66.5949	57.8202	52.5738	70.036	35.2787	51.7155	86.1807	59.3756	48.299	43.0846	108.587	84.8757	83.9185	36.644	49.5368	32.7039	55.6951	57.9352	68.6532	26.0387	55.5127	57.2377	22.2977	23.8369	25.4941	37.4148	34.5875	33.0762	26.6194	52.9922	26.8145	38.5234	48.6337	48.5649
10q25.1	NM_004832	9446	GSTO1	glutathione S-transferase omega 1	1.18416	0.243858	9.12191e-06	0.000365776	19.5876	18.2754	52.8733	64.6065	40.6494	28.2877	18.0555	23.7385	33.4844	15.7394	30.6823	12.4623	15.7393	15.5148	44.2688	53.1819	15.8124	48.6319	41.5135	33.3461	10.3732	23.7128	51.8526	26.9864	29.2365	23.7982	20.2224	21.5527	24.1347	4.02026	4.12352	4.6615	26.5916	22.4498	27.4008	14.9301	15.407	13.4743	24.3399	21.675	22.0159
19q13.42	NM_004542	4696	NDUFA3	NADH dehydrogenase (ubiquinone) 1 alpha subcomplex, 3, 9kDa	0.943883	-0.0833197	9.2076e-06	0.000367494	224.951	188.417	187.679	166.261	131.449	133.875	192.229	262.965	139.5	147.666	144.915	105.19	111.147	241.998	153.174	154.462	77.3239	145.123	146.733	105.51	259.637	265.817	119.23	148.249	132.854	113.947	179.624	146.987	150.068	141.357	129.975	120.44	191.252	159.816	174.232	124.842	157.458	127.46	173.51	196.323	229.008
5p15.33	NM_007030	11076	TPPP	tubulin polymerization promoting protein	0.77531	-0.367155	9.25332e-06	0.000367847	5.05341	3.07276	1.98319	1.27694	2.73611	3.35664	6.65774	3.14699	2.19716	3.71827	1.58594	4.81043	7.5867	3.41112	3.4002	3.30254	9.10443	3.02302	2.21819	2.93094	5.18673	1.81733	2.78458	3.02159	3.74133	4.14285	2.06122	3.69652	2.66113	7.21083	8.3621	10.1372	5.21113	4.19088	5.2496	5.99913	4.77503	5.28504	3.97023	3.81644	4.46641
Xp11.21	NM_001039705	7216	TRO	trophinin	0.826924	-0.274174	9.46545e-06	0.000374787	11.9081	13.2467	6.95469	4.73053	6.87921	9.03743	13.4566	3.34019	10.4529	9.52576	8.01201	6.94738	10.8806	7.15884	13.1483	11.5172	10.1575	10.2616	8.2171	8.04443	12.99	6.83559	7.65028	9.25532	11.4595	8.98685	9.59661	12.6696	12.5289	17.42	18.6626	19.0288	10.0285	9.22652	9.17018	14.3025	10.0812	12.1725	11.8936	12.5422	13.0354
11q13.1	NM_001144936	65998	C11orf95	chromosome 11 open reading frame 95	0.851182	-0.23246	9.55382e-06	0.00037679	9.89375	14.9801	11.2277	9.39016	12.6985	13.1893	13.9538	8.97734	13.1236	15.2478	9.47979	14.1115	13.9949	10.1843	10.3033	11.8329	19.5372	11.7625	11.4811	10.8257	11.9334	7.23904	7.37776	16.361	18.2747	19.5895	16.263	14.6781	10.1522	24.371	23.3767	25.4023	15.8902	14.0804	17.0065	13.3031	13.7204	13.0183	16.2379	14.1786	15.3332
16q24.1	NM_002661	5336	PLCG2	phospholipase C, gamma 2 (phosphatidylinositol-specific)	0.946766	-0.0789195	9.6271e-06	0.000378186	369.123	259.614	238.364	243.491	345.179	264.86	341.575	376.661	322.368	207.577	305.237	173.116	178.655	496.952	218.364	184.208	146.536	169.473	189.899	223.954	380.449	223.591	164.529	273.609	253.36	271.185	311.906	282.735	256.622	286.867	271.261	313.515	345.534	315.051	313.507	245.67	248.71	234.831	315.47	363.771	285.294
Xq21.32	NM_004538	4675	NAP1L3	nucleosome assembly protein 1-like 3	0.682506	-0.551087	9.68352e-06	0.000378911	9.65072	7.94887	4.46605	3.65281	10.6679	12.4648	7.96667	8.34658	5.29844	19.1825	3.81757	9.54256	16.3586	3.78471	6.15632	9.18792	13.5676	5.65035	7.11708	6.65815	21.369	33.7728	5.52529	24.7379	24.5416	22.0312	15.5179	14.1459	11.2064	77.5633	71.0688	66.4922	7.38944	9.30668	8.19176	12.0404	12.5629	15.3516	12.9173	10.6697	10.4035
12q13.3	NM_001276469	2583	B4GALNT1	beta-1,4-N-acetyl-galactosaminyl transferase 1	0.804014	-0.314707	9.80204e-06	0.000381735	2.53936	1.20084	0.29007	0.148654	1.25395	1.45989	2.57832	2.32497	0.558269	2.17954	0.400749	4.13621	3.19863	2.21285	0.265086	0.470028	4.19333	0.158147	0.711895	0.220424	3.18208	2.43339	0.305184	3.15201	2.00251	3.66896	1.36814	1.94056	0.645758	6.26022	7.06297	6.82798	1.11285	0.907196	0.869987	3.71686	3.32932	2.97774	1.3182	1.69139	1.92336
10q23.33	NM_004523	3832	KIF11	kinesin family member 11	1.25024	0.3222	9.83223e-06	0.000381735	2.12174	5.23806	4.61422	5.40984	5.66979	6.73132	2.20278	7.83316	3.88597	10.0442	3.46815	4.41899	6.56328	2.00095	8.11958	8.94142	5.3165	9.46405	11.5345	9.15939	2.44536	4.9256	3.70845	4.6669	4.09766	2.69497	10.5041	11.0204	11.1433	2.17325	1.73476	1.9017	4.39381	5.05037	4.84002	3.75784	2.99732	3.35236	6.29371	5.78618	5.42188
18q21.33	NM_173557	220441	RNF152	ring finger protein 152	0.724867	-0.464212	9.93615e-06	0.000384275	3.23587	3.8059	1.94758	2.31987	2.14621	3.90251	7.34056	1.86156	1.28314	3.09067	1.04026	1.69229	2.54631	0.891651	1.95216	2.41936	3.41694	2.26016	2.05334	2.39847	3.98599	2.32041	3.18112	1.21086	1.7822	1.85304	2.68535	4.55009	1.95753	12.0304	13.5216	12.9141	3.27554	3.66326	3.1933	5.07018	5.1746	5.41721	4.32946	3.52379	4.181
Xq22.2	NM_032621	84707	BEX2	brain expressed X-linked 2	0.699812	-0.514961	1.0138e-05	0.000387576	10.7166	16.8532	15.6535	15.8738	16.085	19.0673	16.1165	11.4759	5.59914	38.0487	6.76324	40.905	55.0929	17.8576	17.9693	24.307	32.8753	8.76984	10.5198	7.52912	30.013	72.551	24.0386	52.4753	56.2497	56.4896	29.1149	48.0446	32.2099	66.0959	64.3661	56.2374	30.9077	29.647	29.4263	19.8598	32.4329	32.3573	40.5666	34.9267	36.6086
16p13.13	NM_015659	26156	RSL1D1	ribosomal L1 domain containing 1	1.16452	0.219732	1.01155e-05	0.000387576	7.81256	15.7562	18.2366	16.1595	26.8208	25.1222	10.8998	35.9788	19.7441	20.8935	14.8203	13.9612	21.762	6.25636	24.4244	26.0052	18.9037	26.4161	30.9453	27.2684	18.3093	25.5705	27.2283	20.7827	21.0426	16.4561	24.8705	18.6205	20.8438	16.4044	12.9025	13.0764	15.4033	17.1903	16.5778	8.66397	7.98884	11.5104	22.4414	17.2624	17.3568
3q25.31	NM_001190992	9197	SLC33A1	solute carrier family 33 (acetyl-CoA transporter), member 1	1.20688	0.27128	1.01337e-05	0.000387576	4.70875	8.2695	9.76064	8.05116	8.89672	8.12717	3.67519	5.49769	8.65329	5.63612	5.42848	3.383	6.44843	3.66993	9.75059	12.7074	5.50944	7.91938	6.46236	6.07896	6.18895	7.12335	8.68786	3.83776	8.43906	5.25312	5.3683	5.24942	5.53814	6.37663	5.56241	5.27337	7.88836	6.51319	7.86088	5.54079	4.39563	4.87773	5.50014	6.14085	5.42693
3q27.2	NM_006548	10644	IGF2BP2	insulin-like growth factor 2 mRNA binding protein 2	1.18977	0.250679	1.05256e-05	0.000400855	7.08366	10.3787	16.097	10.3707	13.4655	14.8252	7.33259	12.1603	11.8123	13.8586	7.21928	6.96701	10.8471	5.64633	18.4876	20.2594	14.6243	27.6447	21.4981	25.0862	7.44206	3.21401	26.7875	6.20458	6.57359	7.87303	13.0754	11.5963	12.196	6.5332	6.18983	5.99268	13.3374	18.1485	15.0358	9.20903	6.08462	7.56984	11.9715	10.227	9.59304
1p31.3	NM_003368	7398	USP1	ubiquitin specific peptidase 1	1.34051	0.422779	1.06399e-05	0.00040367	3.05777	7.9456	5.04334	5.71247	6.14056	7.69939	4.63936	7.39528	5.169	10.8327	5.28067	4.27624	7.6267	3.62888	7.87503	7.3657	6.33106	7.10989	9.6914	9.8698	4.01009	5.75546	6.5838	6.7543	7.82531	5.92371	6.72957	5.34305	6.10166	4.12068	4.10773	5.35175	6.95303	4.6894	4.391	4.05608	3.20557	3.97723	6.16611	5.386	5.46562
16q22.1	NM_004691	9114	ATP6V0D1	ATPase, H+ transporting, lysosomal 38kDa, V0 subunit d1	0.928293	-0.107348	1.07165e-05	0.000405036	51.6491	35.1774	38.505	31.4053	32.8467	30.7524	44.0545	36.7559	40.0689	27.3398	37.4176	24.299	29.3943	27.8686	42.5281	34.963	25.1255	30.7918	24.4403	23.3834	52.3151	31.5284	39.8654	37.7639	35.5379	31.7166	29.4061	36.2845	26.8157	45.7173	43.5407	40.2522	30.5168	26.5301	33.3805	36.5534	33.6129	29.7376	31.92	34.7536	42.088
5p14.2-p14.1	NM_006727	1008	CDH10	cadherin 10, type 2 (T2-cadherin)	1.52295	0.606871	1.07756e-05	0.000405733	0.812355	1.20693	6.30413	4.03969	6.14776	6.6374	1.16891	2.96831	3.80234	3.48263	3.29025	0.783974	1.57822	0.923846	8.06598	8.1331	1.76079	5.21223	5.4552	5.41802	1.9705	3.04758	4.55956	1.75698	1.91743	1.39424	2.64324	1.90193	2.61433	2.84118	2.91287	2.86692	1.30678	2.0907	1.4432	1.60919	1.55643	2.56059	3.10949	3.94341	3.23003
18p11.21	NM_080422	5771	PTPN2	protein tyrosine phosphatase, non-receptor type 2	1.26469	0.338783	1.08255e-05	0.000406078	2.76457	4.92459	8.04343	8.55185	8.54233	8.21974	4.11325	8.23888	3.95596	5.25849	5.70564	4.28665	3.16663	1.98672	9.97003	7.99742	3.58872	9.44732	10.2392	8.36608	3.39411	8.09602	9.36839	4.40041	3.55156	2.51421	9.61796	5.06761	7.82499	3.62946	2.84986	3.6346	5.67829	6.74279	6.63652	2.18467	1.88216	3.74839	7.10973	5.98994	5.85797
15q25.2	NM_014300	23478	SEC11A	SEC11 homolog A (S. cerevisiae)	1.07806	0.108431	1.13363e-05	0.000423645	12.5975	37.5678	43.6563	67.7887	53.2523	48.0196	17.2239	33.9776	52.0668	32.6483	34.9872	15.3877	19.8519	10.074	65.5896	71.7549	15.3101	52.8295	50.2537	34.2513	24.8991	51.4302	56.5181	30.5902	26.2724	15.6704	42.7477	35.38	50.778	20.2029	15.391	12.6044	30.6618	35.4175	31.0117	15.5602	14.1345	18.6619	53.0111	47.1633	48.3441
18q12.1	NM_001191324	51444	RNF138	ring finger protein 138, E3 ubiquitin protein ligase	0.496677	-1.00962	1.14022e-05	0.000424519	0.000124	1.73702	0.908398	1.61526	2.04411	3.21749	1.25536	1.43693	0.556957	6.10989	1.26385	5.8682	6.50533	2.3909	2.13382	3.90577	4.53667	3.16967	3.10847	3.47969	0.839967	1.86613	0.000185	11.4802	10.6713	11.387	7.4219	8.75815	6.99976	5.69217	5.24099	2.85607	4.04913	3.57818	3.82793	5.53845	9.34771	8.01994	2.48647	2.87296	3.30033
15q25.2	NM_004644	8120	AP3B2	adaptor-related protein complex 3, beta 2 subunit	0.717923	-0.478099	1.15294e-05	0.000427657	3.49134	1.52225	1.15569	0.667346	1.26144	2.29528	5.23755	2.40878	0.677869	4.50099	0.619589	4.0333	4.78634	2.63715	1.5002	0.588701	5.8236	1.34175	1.53212	1.09867	6.20457	2.85891	0.618146	2.17913	2.59506	2.71242	2.53709	3.43472	1.27527	8.5032	9.53774	8.86536	1.9389	2.14403	1.77991	6.02139	3.95276	4.69823	2.38632	3.19335	4.01978
3q13.33	NM_001023570	9657	IQCB1	IQ motif containing B1	1.24795	0.319562	1.16125e-05	0.000429146	3.16168	4.87224	7.30871	7.22313	5.91669	6.04019	3.53872	15.3122	4.13115	14.8045	2.81491	5.37146	9.14364	4.02095	11.616	9.93915	6.42274	9.24725	14.0268	9.99036	5.80427	7.91187	13.1882	9.25229	9.09732	5.96129	5.57402	9.5937	8.50581	4.8475	4.73454	4.06076	4.96523	7.0645	5.23725	2.78621	2.83492	4.10825	9.23	8.57868	8.67651
12q23.3	NM_001034173	160428	ALDH1L2	aldehyde dehydrogenase 1 family, member L2	1.60543	0.682957	1.16901e-05	0.00043042	0.844636	7.99554	2.34834	1.47724	5.47478	6.64056	1.44402	1.19476	6.12115	3.67267	4.72233	0.775181	1.43856	0.796776	3.82456	3.31134	1.86871	2.48937	1.70912	1.49826	1.85858	2.27854	2.59484	1.06015	0.96971	0.824796	4.25662	3.2234	3.4857	0.917573	1.25102	1.21352	1.02085	1.1066	1.1244	1.62408	1.09588	2.05957	2.82787	3.64063	3.08644
19q13.33	NM_032712	84798	C19orf48	uncharacterized protein C19orf48	1.28553	0.362364	1.2094e-05	0.000438923	19.8122	31.0622	28.2624	38.2819	22.6393	20.3677	25.7471	20.6098	30.0152	12.7705	40.6262	11.8412	11.3058	25.3554	29.3945	31.8564	11.088	31.7644	26.3522	29.7441	14.8641	19.7831	24.6589	20.9327	19.875	17.357	15.7172	22.2333	16.6163	7.00861	7.61126	6.96689	10.4307	7.39142	9.42817	16.322	16.8938	10.3596	18.4139	24.8409	25.6394
7p14.2	NM_001199708	23366	KIAA0895	KIAA0895	0.614064	-0.703539	1.20124e-05	0.000438923	0	1.438	1.16856	1.49557	0.763911	1.63816	1.49931	0.848508	0	4.0148	0.455522	3.11765	4.66894	0.563236	1.41866	2.16371	3.90693	1.92474	1.43364	0.878165	0.486738	3.13347	1.07405	2.10649	2.97406	1.38308	2.59655	2.80682	3.44202	3.83552	4.43616	3.99805	3.49749	4.46232	2.94977	1.49655	2.56476	1.81557	4.07636	3.07255	2.96536
17q25	NM_006937	6613	SUMO2	small ubiquitin-like modifier 2	0.951699	-0.0714224	1.2097e-05	0.000438923	182.743	150.625	246.115	207.354	178.479	177.793	120.292	222.879	163.225	188.699	98.5196	140.102	154.368	156.519	183.292	199.231	118.66	206.688	164.32	127.617	135.97	208.398	145.527	232.091	193.572	191.64	211.277	226.919	164.004	201.9	181.137	174.863	160.986	149.802	165.901	150.089	226.216	172.095	176.554	186.472	181.003
1p34.3	NM_016037	51118	UTP11L	UTP11-like, U3 small nucleolar ribonucleoprotein, (yeast)	1.19594	0.258141	1.20718e-05	0.000438923	4.42378	7.77118	10.5096	10.5283	12.0039	11.3158	5.89506	18.2037	11.6939	14.801	7.77796	9.68359	13.8077	4.1905	13.265	12.79	10.2606	11.5306	12.376	10.7666	11.641	18.5853	12.496	11.0233	12.4922	8.79695	12.0484	12.581	10.1187	10.6573	7.7009	7.61883	6.2726	7.65861	7.22757	5.81415	5.2801	7.14391	9.47648	8.51047	9.30922
17p13.3	NM_001013672	400566	C17orf97	chromosome 17 open reading frame 97	0.65501	-0.610411	1.22817e-05	0.00044401	5.67322	4.62523	1.7993	1.39315	1.60589	2.09929	8.22473	0.851232	2.82912	2.32489	1.9044	2.35629	2.00879	3.24307	2.46525	2.14671	1.53619	1.0446	0.655052	0.970789	3.24356	1.40413	1.4924	3.60299	2.83742	3.29048	2.43595	2.10991	3.64736	3.38222	3.22342	3.51459	3.33257	2.82847	2.54404	1.72484	1.73933	1.39675	4.27255	3.59168	4.70041
6q14.1	NM_001199919	5238	PGM3	phosphoglucomutase 3	1.30636	0.385552	1.24561e-05	0.00044869	1.48309	6.06061	8.67704	7.37343	12.8638	11.0873	2.24512	8.92706	14.3766	6.36446	8.05858	2.99894	6.31098	1.43327	19.4486	15.9122	5.04827	11.57	11.9936	8.23556	10.3308	17.4045	21.7922	10.3926	11.7274	5.53437	7.33316	11.1478	13.2717	3.92019	3.91422	4.10682	5.50043	3.47733	6.14209	5.34479	0.886037	3.57799	10.8769	10.8821	10.2644
20p12.2	NM_014962	22903	BTBD3	BTB (POZ) domain containing 3	0.595379	-0.748121	1.27081e-05	0.000450849	3.48187	2.25756	0.634652	0.393137	2.11413	5.9595	3.45862	0.416767	1.01678	2.15898	1.51103	1.51755	1.95636	1.12817	4.02518	4.62347	2.37064	1.15668	1.69946	0.82556	3.16391	7.29378	0.70112	3.31321	2.1298	1.51664	5.054	3.63338	5.3974	15.0201	18.0775	13.4563	1.71322	1.82108	1.37075	4.32524	3.38567	6.60251	4.50167	3.83246	4.42571
12p11.21	NM_144973	160518	DENND5B	DENN/MADD domain containing 5B	0.792253	-0.335966	1.26637e-05	0.000450849	2.40488	3.60147	3.52631	3.4232	3.37205	5.05714	3.34664	5.22217	2.85073	6.95987	1.8437	3.50943	6.50201	1.72305	4.24175	6.00654	7.48639	5.15152	4.56093	4.27834	3.40337	4.79772	5.39866	4.81329	4.81966	4.03127	6.0949	5.15364	6.25272	7.13615	7.54765	7.16987	7.45537	8.16685	7.62067	4.68257	4.23918	5.52468	6.0965	5.25087	5.45187
2q37.3	NM_030768	80895	ILKAP	integrin-linked kinase-associated serine/threonine phosphatase	0.8978	-0.155533	1.26355e-05	0.000450849	8.6257	8.84381	7.8358	7.06188	7.99429	9.75413	8.56855	11.2003	8.2051	8.75235	6.55802	9.8689	12.0383	9.48501	8.22845	8.07919	10.9105	7.59284	10.7009	9.93541	9.0876	11.9933	8.6825	14.7752	14.609	14.0657	13.0597	12.4662	8.97003	14.2027	12.694	13.7218	11.4715	8.87417	10.7603	10.9237	13.8927	9.77561	9.19643	9.18156	8.44412
6p22.3	NM_001286265	57380	MRS2	MRS2 magnesium transporter	1.36903	0.453154	1.27333e-05	0.000450849	2.89778	4.28568	6.79298	8.67715	4.94513	4.32126	2.99109	7.22602	3.50187	6.07809	3.15652	3.5235	4.15056	2.14919	6.51052	6.69934	4.90869	6.7471	8.90356	7.15177	4.01152	7.00321	7.59304	3.59871	4.62242	3.696	4.93758	3.40089	4.79375	4.631	3.15518	4.22858	3.21904	3.53056	3.23323	2.03293	2.45592	2.44185	5.19276	4.02749	5.59813
11p14.2	NM_178498	159963	SLC5A12	solute carrier family 5 (sodium/monocarboxylate cotransporter), member 12	1.55642	0.638233	1.2742e-05	0.000450849	0.206886	0.025931	10.2797	9.55852	4.07036	3.91264	0.039297	0.386893	0.523068	0.43786	0.496275	0.036158	0.187616	0.036547	8.7353	10.2092	0.228799	4.30507	3.72514	3.06101	0.383865	0.165638	13.8531	3.08874	1.95007	1.55057	0.285841	0.168906	0.61938	0.035503	0.064937	0.048422	1.82412	1.71853	1.65511	0.694127	0.673798	1.16525	1.33597	1.4188	1.15385
22q11.21	NM_001196	637	BID	BH3 interacting domain death agonist	1.68975	0.756813	1.28641e-05	0.000452932	3.44408	2.7209	7.34036	7.37614	4.06657	4.49936	3.29524	1.38569	7.34875	2.43955	6.55408	3.84598	3.3416	3.17979	4.59525	6.39633	3.26404	2.38616	4.24872	3.821	3.32906	2.225	7.49717	0.832795	4.58231	4.22194	4.10896	3.02085	4.63469	3.01269	1.97815	1.08148	2.93273	1.96399	2.56001	2.56893	1.41249	1.32004	3.76996	3.87669	4.9656
8p22	NM_001008539	6542	SLC7A2	solute carrier family 7 (cationic amino acid transporter, y+ system), member 2	1.52541	0.6092	1.2937e-05	0.000452932	0.288711	6.00413	10.6423	10.2784	7.74203	7.43923	0.369966	0.649871	3.48135	1.38066	2.44031	0.092363	0.359931	0.136462	8.96354	13.386	0.271799	7.86327	7.6684	6.34511	0.231971	0.462811	20.6578	2.66613	3.6845	2.83104	2.00102	1.50365	2.78023	0.066668	0.183869	0.058809	4.14769	3.50915	4.15167	1.21777	0.581845	1.74414	3.21267	2.715	2.3564
17q25.3	NM_003258	7083	TK1	thymidine kinase 1, soluble	1.36628	0.450256	1.2901e-05	0.000452932	7.41901	13.4838	13.2254	14.9483	13.008	11.4863	5.37234	4.54878	17.3524	5.03367	23.3062	2.1431	2.19838	7.74038	16.2083	14.7065	2.85488	14.072	11.9803	10.8041	5.65109	3.91265	4.93308	6.42567	8.0629	4.47109	9.20072	13.9737	10.2158	1.54135	1.74813	1.54209	6.54786	5.18414	4.58739	7.06299	5.45433	3.59464	7.34036	10.3281	10.5728
Xp11.3	NM_001257291	84679	SLC9A7	solute carrier family 9, subfamily A (NHE7, cation proton antiporter 7), member 7	0.733228	-0.447665	1.30682e-05	0.000455926	1.18528	1.72911	1.66359	1.13436	1.82894	2.78787	1.83741	1.77776	0.585839	3.67404	0.631167	1.89836	4.16637	0.929751	1.9695	2.58529	4.20104	2.3318	2.13386	0.989548	2.23561	2.26142	3.74687	2.80542	3.79354	3.39244	2.09494	2.1677	2.26836	15.6214	17.4777	17.6696	2.56088	2.39432	2.59662	3.03045	2.23244	2.61727	2.58769	2.4113	2.2108
11q22.3	NM_153705	143888	KDELC2	KDEL (Lys-Asp-Glu-Leu) containing 2	1.27482	0.350293	1.31309e-05	0.000456515	3.84663	20.9077	15.1005	14.6196	11.7287	11.8937	5.75243	2.56607	10.3931	5.3875	7.7201	2.11322	2.57066	1.90016	12.1829	16.3795	2.39954	11.8216	8.02881	7.06596	3.72991	6.53881	16.4265	6.1335	5.15752	3.24021	5.57553	5.74297	9.13002	1.51831	1.44057	1.26222	7.52621	8.92776	8.83187	3.79265	3.71561	4.20317	9.23347	7.88328	7.64491
2q37.1	NM_005737	10123	ARL4C	ADP-ribosylation factor-like 4C	0.703286	-0.507817	1.33683e-05	0.000460534	8.71732	11.7904	9.70628	5.65125	9.36373	12.8205	14.3558	5.64047	7.69294	13.2743	4.98975	2.89114	3.71096	3.26047	12.9205	15.8666	7.77027	9.88832	9.44017	10.6904	8.50843	6.54233	10.773	6.36678	8.67082	6.20419	10.2661	8.25698	11.6128	26.9332	26.1849	25.5988	11.5379	12.6079	15.2409	11.2086	9.58398	14.7557	21.0607	15.4462	15.6294
8q21.13	NM_005536	3612	IMPA1	inositol(myo)-1(or 4)-monophosphatase 1	0.679911	-0.556583	1.34311e-05	0.000460534	1.22855	2.76145	2.38255	2.95981	0.934641	1.91421	1.06768	4.31982	0.902251	4.43846	0.850985	2.07295	1.91404	0.522646	3.04097	3.43262	1.8782	1.95836	2.02554	2.16604	1.96434	4.23012	2.5643	4.76792	5.66082	3.77953	3.90453	5.09467	5.17591	5.25768	4.12148	4.30136	2.09331	3.09043	2.99338	2.21735	2.90232	3.50169	3.44669	2.79374	3.13962
7q36.3	NM_017760	54892	NCAPG2	non-SMC condensin II complex, subunit G2	1.34805	0.430877	1.33142e-05	0.000460534	1.55575	2.59173	2.68958	3.62307	3.20024	3.14882	1.40872	2.48548	3.1827	4.98464	1.99954	1.98562	3.66249	0.91492	5.10242	5.25985	2.54241	5.6372	7.16102	5.40355	2.5581	3.40707	1.42435	1.61863	2.01661	1.50497	4.24436	5.23844	5.77085	2.31028	1.30921	2.19289	2.25949	2.67181	2.12562	2.21377	1.94828	2.34611	3.95858	3.24983	3.7586
17p13.3	NM_002945	6117	RPA1	replication protein A1, 70kDa	1.20088	0.26409	1.34061e-05	0.000460534	4.06639	8.02685	5.77177	8.29153	9.29152	9.79208	6.04894	10.2055	8.14578	8.55223	8.48392	4.78853	8.06357	4.42549	12.7496	10.8488	9.76491	18.3253	20.101	17.7031	4.89502	8.71007	10.2995	8.05867	7.02928	5.83466	10.6287	11.1878	14.3473	5.11896	4.90646	5.78086	9.04054	8.44878	8.18156	4.62357	4.75541	5.21496	8.63329	9.14562	9.76073
6p22.2	NM_003526	8347	HIST1H2BC	histone cluster 1, H2bc	1.05324	0.0748301	1.3566e-05	0.000461985	577.92	377.354	598.038	539.874	471.371	355.585	291.322	640.405	599.947	345.519	575.579	279.522	300.906	714.556	515.788	420.961	236.913	622.333	578.199	491.352	357.886	430.861	161.144	267.516	327.149	250.897	350.992	431.41	410.702	156.662	134.762	148.061	314.743	265.78	286.287	247.453	344.842	190.897	259.537	361.451	373.251
5q31.3	NM_018930	56126	PCDHB10	protocadherin beta 10	0.908227	-0.138876	1.35488e-05	0.000461985	1.68776	2.28364	1.18531	0.861309	1.52614	2.07622	1.83895	1.59786	1.60869	2.5222	0.646543	1.44463	2.73838	1.01468	1.42214	1.41928	3.37315	2.03863	1.29808	1.15109	2.99	2.00849	1.3467	2.43205	2.06862	1.81547	2.38974	2.35008	2.38422	6.02508	5.98695	6.6109	1.63245	1.30634	1.15082	2.07048	2.09801	2.27945	1.69401	1.91519	1.96212
10q23.32	NM_182765	143279	HECTD2	HECT domain containing E3 ubiquitin protein ligase 2	0.775334	-0.367111	1.37396e-05	0.000466305	0.933427	4.2748	2.13776	1.87176	2.62397	2.52534	1.92204	0.653613	1.60995	2.61984	1.56286	1.22968	1.29526	0.572553	2.40187	2.78275	1.71904	1.56022	1.2541	1.03088	0.805713	1.71588	1.23738	2.80458	2.47697	2.36976	3.15281	2.63727	3.32787	3.26206	2.92811	3.35572	3.15414	3.18172	3.17692	3.09766	3.99922	3.37083	2.86578	2.21382	2.43967
7q34	NM_003143	6742	SSBP1	single-stranded DNA binding protein 1, mitochondrial	1.08911	0.123149	1.401e-05	0.000473869	17.353	32.6198	57.3833	63.0512	45.7872	37.3098	21.555	47.1975	42.9379	43.8507	34.7219	30.6696	35.4274	23.2823	55.5857	56.5686	21.8997	53.2513	50.3771	32.8109	36.0087	62.0187	44.5262	41.6346	47.0328	35.733	43.724	48.1321	41.4781	28.4472	26.5288	21.4455	25.1093	28.8294	30.195	19.1902	32.0586	23.6074	37.9882	37.3178	33.4458
12p12.3	NM_015954	51071	DERA	deoxyribose-phosphate aldolase (putative)	1.20892	0.273724	1.4236e-05	0.000477678	2.17266	6.12202	13.3812	14.6229	9.02068	7.94845	3.1998	4.78087	7.70348	6.8202	4.89676	2.53996	3.10095	2.27102	12.1511	13.9444	2.17207	11.2847	9.89066	7.56592	4.32638	7.37519	18.0863	7.00031	6.84654	4.78531	9.65326	8.41062	7.75807	2.34446	2.75303	1.5851	7.18534	8.33834	7.56194	3.20601	4.40728	4.60029	6.92512	6.73131	6.66913
5q13.3	NM_005242	2150	F2RL1	coagulation factor II (thrombin) receptor-like 1	1.6536	0.725613	1.43928e-05	0.000477678	0.385796	0.871611	13.5095	11.5276	5.43229	4.65099	0.812863	3.71937	3.84103	1.7301	2.58297	0.592659	0.619526	0.571919	6.03131	10.475	0.24336	7.86798	9.33436	6.73355	0.429044	1.19489	17.9489	2.54725	3.38343	2.05059	1.80053	1.70023	1.66603	0.620218	0.32303	0.325054	2.73886	2.82813	4.27823	1.53171	1.30142	1.40011	2.11135	1.52469	1.90228
1p13.2	NM_198268	204851	HIPK1	homeodomain interacting protein kinase 1	0.73823	-0.437858	1.43823e-05	0.000477678	3.59749	11.513	6.07046	4.31005	5.92231	8.92162	6.80833	6.97457	3.1944	11.5213	2.80532	5.41572	6.81362	2.41946	9.53861	10.0444	9.58476	8.32782	7.60277	6.11301	4.66051	5.24235	10.6667	7.39479	8.69511	6.71521	10.1259	10.6273	14.2767	9.02416	9.20179	9.30787	11.8591	10.945	11.088	8.97277	5.11552	9.7446	12.0187	11.2604	11.1001
12p12	NM_004264	9412	MED21	mediator complex subunit 21	0.790503	-0.339158	1.44577e-05	0.000477678	2.17668	6.21828	5.76094	4.84096	5.22796	7.46215	3.05367	4.61152	2.99478	7.40385	3.15296	6.11862	6.19407	2.05084	5.38661	6.94759	4.48383	4.25052	4.25273	3.52636	3.32414	8.76329	6.36907	4.93579	6.0572	4.8608	9.99405	8.55911	7.6307	10.0638	9.12772	8.49982	6.51114	6.1326	6.40452	6.07353	7.46895	6.93228	7.15914	7.24333	7.1312
21q22.11	NM_000454	6647	SOD1	superoxide dismutase 1, soluble	0.908499	-0.138443	1.42955e-05	0.000477678	52.6478	66.9522	91.9169	87.4354	91.0057	89.4895	58.625	145.608	91.5694	94.0747	69.0385	70.1027	86.0078	53.5716	113.91	107.387	65.6011	74.072	94.1641	77.3638	93.7259	193.754	85.9951	98.0927	110.131	92.9789	129.295	111.045	132.262	121.523	111.434	92.1884	119.912	130.357	125.941	62.356	87.5382	82.4154	121.753	107.803	115.448
8p12	NM_000553	7486	WRN	Werner syndrome, RecQ helicase-like	1.30378	0.382699	1.44116e-05	0.000477678	1.20354	3.33793	2.59099	2.40016	3.38999	3.43203	1.78949	3.72417	1.99646	4.73616	2.16511	2.51079	4.19998	1.4908	4.48893	4.19115	4.11136	4.51918	5.41706	3.8017	2.73136	4.45675	5.48918	4.12211	3.65446	2.78115	3.97552	4.14522	5.23654	2.16101	2.24304	2.37674	2.19983	2.79585	2.30064	2.26099	1.51439	2.77304	2.82138	2.6039	3.08123
19q13.43	NM_003417	9422	ZNF264	zinc finger protein 264	0.878581	-0.186753	1.44218e-05	0.000477678	1.75029	3.55858	2.66683	1.7318	2.00578	3.07671	2.53904	1.89279	2.084	3.42202	1.61456	2.06918	3.11224	1.1878	2.63172	3.0581	4.17025	2.92713	2.71288	2.68132	1.89707	1.98952	4.24928	3.33899	3.54958	3.53332	3.11025	2.8401	3.16287	2.85553	3.29888	3.44849	3.48106	3.70515	3.58122	3.52002	2.93901	3.38988	3.5608	2.91978	2.95832
Xq21.1	NM_003022	6451	SH3BGRL	SH3 domain binding glutamic acid-rich protein like	0.817754	-0.290261	1.4543e-05	0.000478911	13.2564	30.8983	23.8644	26.6341	25.7675	32.3415	13.5494	16.2735	16.6667	23.4917	15.538	14.5272	14.7598	7.52752	26.3067	30.1588	11.7946	18.3389	16.9019	14.358	15.4318	32.8703	22.8138	24.9031	22.1017	16.0887	31.1845	32.5377	32.7749	28.8675	27.8957	23.3204	25.8201	28.2842	30.522	21.4698	30.0601	30.7979	34.8333	29.909	31.0491
3p14.3	NM_015576	26059	ERC2	ELKS/RAB6-interacting/CAST family member 2	0.7327	-0.448705	1.48102e-05	0.000481357	1.17265	1.26993	0.554006	0.454543	1.15413	1.89032	1.49347	1.66469	0.333525	2.95684	0.287167	1.58626	3.91947	0.745732	0.957017	0.879528	3.36804	1.03623	1.12168	1.34457	2.49901	2.63821	0.578659	1.75485	1.78362	1.59262	2.21461	2.53225	1.78525	6.19407	7.05963	7.44333	1.7455	2.00063	1.61147	2.85216	2.24982	2.79036	2.56014	2.20559	2.65587
15q14	NM_024713	79768	KATNBL1	katanin p80 subunit B-like 1	0.782644	-0.353572	1.47964e-05	0.000481357	2.63311	6.0417	4.7104	5.07152	3.83826	5.93393	3.86039	4.16266	2.6163	9.17549	3.28501	5.77109	6.73881	2.50048	6.64203	8.13192	5.73954	4.02906	5.4893	3.81913	4.03189	9.30671	6.9335	7.40736	7.23329	7.69839	6.27167	9.73638	6.16761	9.56804	9.2397	8.18606	4.20231	5.25855	5.73406	7.62266	9.99991	9.27515	7.83099	6.66417	6.61309
14q24.2	NM_015351	23508	TTC9	tetratricopeptide repeat domain 9	0.854187	-0.227376	1.47483e-05	0.000481357	2.18805	2.46881	2.31648	1.12219	1.80835	2.88045	4.03599	1.41829	1.7585	2.96058	0.927997	3.01998	3.97184	1.89317	1.75164	2.65616	4.04201	1.9187	1.97872	1.92844	3.34711	2.79425	3.86817	1.79503	2.34961	2.21956	2.62645	3.42556	1.64227	10.4732	10.6588	10.7738	1.17405	1.47787	1.18527	5.29282	4.35402	4.33926	3.5608	2.95744	3.30377
Xp11.3	NM_004651	8237	USP11	ubiquitin specific peptidase 11	0.877501	-0.188528	1.47481e-05	0.000481357	101.381	48.2351	38.1399	21.743	30.8124	28.9339	64.5144	44.4374	38.8574	45.598	26.8995	33.1473	50.3711	47.249	38.9697	37.0241	45.9825	46.5127	37.9766	37.8703	87.3974	43.5469	30.4225	67.4739	74.5388	85.0884	25.8227	48.0849	37.8901	90.9322	99.5998	104.473	37.2163	31.8949	35.3333	44.3823	49.187	40.087	39.593	40.7911	46.5061
2p23.3	NM_001303050	22924	MAPRE3	microtubule-associated protein, RP/EB family, member 3	0.669067	-0.579778	1.50377e-05	0.000487162	8.58332	6.40691	1.78523	2.83168	2.92473	3.95703	12.6634	4.20441	1.1367	5.95028	3.38503	4.80032	6.72127	4.84789	3.18263	3.84275	10.0945	2.48462	2.97145	2.90156	8.55126	3.14759	0.616231	6.31892	4.55124	5.69958	2.53387	6.39431	3.1716	9.58247	11.1778	10.8568	7.35783	4.05385	5.35612	8.87985	8.3416	7.96475	6.54264	7.50823	6.21047
2q13	NM_004336	699	BUB1	BUB1 mitotic checkpoint serine/threonine kinase	1.30514	0.384201	1.52555e-05	0.000489607	1.61179	3.16121	4.95188	5.85326	5.72071	5.62107	1.27382	14.5199	4.11706	9.37635	3.21797	4.64451	7.46837	2.20247	8.54712	9.36187	5.70392	11.5842	22.38	15.8683	2.59301	5.45359	2.55658	4.16077	4.27661	2.97451	10.7784	10.1138	11.0677	2.07933	2.06186	1.1473	5.80013	5.94866	6.33576	3.69973	3.32736	3.25488	4.43254	4.75824	5.27772
11p13	NM_001001391	960	CD44	CD44 molecule (Indian blood group)	1.46216	0.548097	1.52379e-05	0.000489607	1.30613	2.42915	8.4643	6.67532	5.2994	6.51622	2.66493	0.882125	2.12588	1.14802	1.99269	0.381058	0.786502	0.429773	6.52088	5.84622	0.89508	4.63426	3.50445	3.24156	2.50806	3.48247	9.21123	3.17811	3.30363	1.59938	1.47748	0.849969	2.29797	0.671314	0.719886	0.733853	1.12307	0.941566	1.71779	1.97179	2.34506	2.69828	2.289	2.42495	2.49559
6p25.2	NM_020135	56897	WRNIP1	Werner helicase interacting protein 1	0.916304	-0.126101	1.52604e-05	0.000489607	14.9816	13.4621	12.8674	10.2246	13.8122	13.1407	15.3971	13.2967	13.3768	11.3681	9.931	12.4786	13.1777	12.3007	15.0766	14.6795	14.3156	14.5375	14.5158	11.958	11.5545	10.4899	12.8137	14.5577	15.1331	14.6817	13.1831	11.74	9.74272	16.3002	16.159	17.4056	16.8689	15.6766	17.4288	12.3106	13.9611	12.1302	13.0613	13.136	13.0254
1q21.3	NM_006818	10962	MLLT11	myeloid/lymphoid or mixed-lineage leukemia (trithorax homolog, Drosophila); translocated to, 11	0.84335	-0.245796	1.5376e-05	0.000491736	70.6333	37.9693	32.8577	43.9342	34.5345	44.4376	61.0849	47.2527	22.0221	75.2568	18.6043	88.5817	93.8512	67.983	36.6554	37.9524	86.4311	35.2718	31.4379	27.8196	88.0417	155.433	24.5165	71.7121	65.3326	74.6971	45.8881	79.6553	46.0322	146.896	141.621	130.245	59.8217	47.1102	53.9178	72.1871	124.891	88.8097	49.677	50.7855	58.0632
Xq23	NM_014289	827	CAPN6	calpain 6	1.8455	0.884011	1.56174e-05	0.00049786	2.44658	59.0668	2.71258	1.4359	8.31805	9.24816	14.3537	0.119212	6.28955	0.85661	4.59565	0.57683	0.823897	0.479443	3.59695	3.9547	0.598439	2.47545	3.02567	3.56264	14.4844	13.7809	4.36959	1.69716	2.20963	1.27424	2.17195	1.29804	3.50122	0.478887	0.089612	0.143153	2.27141	2.41085	2.46731	1.31547	0.778426	0.905127	4.33378	2.34824	2.81814
1p34.2	NM_001255	991	CDC20	cell division cycle 20	1.21892	0.285599	1.58019e-05	0.000502137	27.2483	18.118	28.6141	28.4505	20.5971	18.6189	11.0142	85.9204	32.6504	25.3473	26.614	17.753	19.1493	37.2461	38.3157	32.688	20.781	54.0565	83.3452	70.3064	18.7134	7.34211	10.859	17.2973	20.8514	21.1024	34.4804	41.7737	28.4968	4.92621	4.35999	4.02758	23.7283	17.3439	22.0422	16.4496	22.2401	12.2741	11.5576	17.795	20.4854
5q13.2	NM_031966	891	CCNB1	cyclin B1	1.12572	0.170849	1.59966e-05	0.000505207	7.36317	10.8503	16.3897	25.5103	16.774	17.8838	5.51206	40.9325	13.9577	24.1554	14.2332	11.724	15.2081	12.4301	26.3904	27.233	13.324	30.3925	53.9382	41.9931	10.9144	17.8949	13.4693	15.6021	18.3629	12.1458	30.4999	34.1111	28.8213	8.22556	7.38684	6.59088	17.5167	17.1393	16.0136	10.3899	11.7984	10.9565	13.9731	14.7823	14.9067
5q23.3-q31.1	NM_181705	90624	LYRM7	LYR motif containing 7	0.834881	-0.260357	1.60328e-05	0.000505207	1.06227	3.02391	2.22414	2.08114	1.89482	2.38194	1.90514	0.750966	1.89789	4.45209	1.24325	2.92245	3.03032	0.785749	1.39291	2.81044	3.6531	1.57499	1.81257	1.40689	1.61305	1.79289	1.62067	3.53222	3.99165	3.69793	3.28466	3.45657	3.55386	3.73247	3.86258	3.41406	2.29087	2.64489	2.566	2.21472	2.31964	2.58867	3.01022	2.21111	2.66195
7q22.3	NM_002736	5577	PRKAR2B	protein kinase, cAMP-dependent, regulatory, type II, beta	0.654446	-0.611655	1.60504e-05	0.000505207	3.76071	5.10402	2.59602	3.05255	4.24624	7.38166	6.6315	4.942	1.85523	17.3256	1.32697	17.4823	21.1265	3.08949	3.34559	3.83723	19.3203	3.99456	3.91335	3.79118	6.96281	10.4131	2.37471	10.792	10.182	9.92908	7.55944	12.7848	7.60748	27.6592	23.7513	24.2985	5.32491	6.06046	5.68133	8.76997	12.0781	13.6395	9.33924	8.98189	8.56807
19p12	NR_003662	388524	RPSAP58	ribosomal protein SA pseudogene 58	1.2172	0.283572	1.61187e-05	0.000505762	39.4558	39.0231	28.5297	57.1283	31.849	25.3942	35.4647	57.7637	37.04	24.3375	53.8974	21.0395	25.2646	60.5913	59.3493	51.4961	19.8541	56.5695	67.4382	58.8111	45.4613	58.8369	28.6923	36.2338	30.7956	26.6843	17.3976	38.9849	31.1006	25.3576	24.1171	22.3493	20.0864	16.2551	18.041	21.2281	30.3278	24.382	24.5074	31.9387	33.9062
10q21.1	NM_007057	11130	ZWINT	ZW10 interacting kinetochore protein	1.29732	0.375531	1.64061e-05	0.000513167	3.17119	5.87036	11.0842	6.98391	7.32563	6.70363	3.01858	7.03629	8.35429	6.59792	4.80929	2.74639	4.59201	5.64458	9.73038	9.58517	2.20641	9.19799	7.23549	7.46151	3.01753	4.16886	5.58348	3.95322	7.27477	3.8908	8.41277	9.1426	9.31187	2.53558	1.61972	2.17131	6.2378	6.24604	5.21654	4.33936	7.37331	3.59067	7.09035	7.13626	4.89993
12q24.31	NM_025140	80212	CCDC92	coiled-coil domain containing 92	0.878638	-0.186659	1.64859e-05	0.00051405	7.16265	7.95918	11.2384	7.63876	5.14926	6.20497	9.1881	4.81292	8.32037	6.78299	5.76336	6.28041	9.09409	6.47782	6.20536	6.87463	8.90849	6.01396	5.67597	6.30242	5.71654	2.33749	8.30481	6.59569	8.7521	7.81675	10.7204	7.80245	6.84396	9.95543	9.72743	10.5999	10.2796	8.80716	9.65045	8.22863	5.59304	5.86984	7.50422	7.02782	8.59627
18q12.1	NM_004775	9331	B4GALT6	UDP-Gal:betaGlcNAc beta 1,4- galactosyltransferase, polypeptide 6	0.664645	-0.589344	1.67999e-05	0.000520588	2.49791	3.70175	3.03975	2.10278	1.84015	2.60124	1.90327	1.73897	1.51112	4.06309	0.988879	2.24003	2.17537	1.10023	2.73207	2.85399	3.03688	2.53783	2.80996	2.2432	1.02879	1.75915	3.28696	3.52029	2.62057	2.71169	3.13483	2.83763	4.39424	2.20367	2.39012	2.66254	5.08817	5.19279	5.77118	2.51454	2.51242	2.44567	3.83602	2.87488	3.15501
12q24.33	NR_002979	677829	SNORA49	small nucleolar RNA, H/ACA box 49	0.830989	-0.267099	1.67888e-05	0.000520588	1722.44	284.595	166.722	1057.77	1462.21	1439.38	2041.91	429.712	160.687	1145.46	1332.14	1757.65	1259.37	2618.16	1544.72	1512.29	1600.97	1528.3	1748.52	1437.08	738.381	1049.61	1022.83	2321.46	993.108	1179.14	1072.61	1559.15	1724.92	2237.22	1962.6	2920.01	1635.08	2113.99	1729.01	1888.98	939.994	1827.45	2344.81	2577.8	2113.24
12q21.1	NM_018279	55266	TMEM19	transmembrane protein 19	0.833193	-0.263278	1.69678e-05	0.000524164	1.76196	3.52725	2.76716	2.99993	3.14924	3.96454	2.48899	1.91303	1.79934	4.76007	2.14658	3.92528	5.0408	1.4551	3.36671	5.23867	4.95639	2.82892	2.4799	1.95366	2.4061	4.04126	3.18852	3.45915	4.42852	3.6875	4.3148	4.55082	3.60957	5.96903	5.72671	5.45815	4.06887	5.14964	4.8054	3.28697	3.89234	3.82364	3.84744	3.54811	3.69295
1q21.3	NM_153649	7170	TPM3	tropomyosin 3	1.12902	0.175066	1.71897e-05	0.000529378	8.19043	18.0658	33.9828	19.4123	26.4608	26.7205	10.1846	23.7847	25.7024	23.5302	17.3737	5.08179	17.1698	8.67945	33.7936	31.9093	10.3641	31.9743	31.454	27.6244	11.7572	12.7568	56.815	20.0137	22.4954	15.1037	23.8365	28.4163	28.6067	9.62628	8.21552	8.91588	17.9123	18.7133	18.6695	10.2805	9.71573	10.4077	19.6128	17.5945	18.9485
17p13.1	NM_001185022	1366	CLDN7	claudin 7	1.94527	0.959971	1.7308e-05	0.000531381	0.641035	1.56189	14.147	17.3543	7.03614	7.92493	3.54194	0.317986	6.10025	0.230507	9.05129	0.22836	0.327169	0.301806	9.14153	8.21833	0.242625	10.3693	13.9248	13.9625	0.235817	0.325357	36.927	2.56254	4.09416	2.17417	2.84502	2.93439	1.95893	0.033842	0.052422	0	1.50461	1.42067	1.51866	1.09234	0.787335	0.405448	2.71619	4.08945	3.52961
6q13-q14.1	NM_004370	1303	COL12A1	collagen, type XII, alpha 1	1.91695	0.938816	1.7388e-05	0.0005322	2.64437	48.4611	9.36954	4.35816	6.19699	8.28785	17.7427	0.128614	13.8988	1.22866	8.84153	0.553235	1.6352	0.41744	9.32381	9.9565	1.13368	5.23599	3.88631	4.7541	6.6138	7.37382	22.6489	2.03603	2.53301	1.32176	2.41602	2.53367	2.89647	1.08752	1.09141	1.17125	1.21453	1.03018	0.526576	4.54663	1.76409	4.00165	3.26844	4.58964	3.19025
7q21.3	NM_022900	64921	CASD1	CAS1 domain containing 1	0.727137	-0.459702	1.77178e-05	0.000540637	2.67402	4.54917	7.3203	6.4883	4.06709	5.93251	2.73538	2.946	3.03036	10.4052	2.59562	7.02567	7.2442	1.41241	6.41444	9.46437	6.9195	4.91356	5.73837	4.89116	3.3225	6.63536	8.74341	6.64736	6.61526	5.32137	9.88302	10.0374	9.54734	10.7425	9.48246	8.05222	8.00166	10.0137	9.98286	6.10631	8.0263	9.19647	10.9672	8.70606	8.92762
16p11.2	NM_007074	11151	CORO1A	coronin, actin binding protein, 1A	0.642438	-0.638371	1.77809e-05	0.000540909	4.09092	2.09978	1.20103	2.0285	1.86178	1.97486	4.72941	2.53007	2.39147	2.64489	2.22536	4.07887	4.4348	4.71495	2.99497	2.32154	4.50805	1.76418	1.75825	1.97462	5.30501	2.87385	0.133597	5.79221	5.65778	6.33013	4.28321	7.20143	3.31607	8.6183	7.00035	8.15368	1.52275	1.41332	1.46155	6.64228	7.58251	5.3896	4.2526	5.32105	7.40681
13q14.3	NM_006704	10910	SUGT1	SGT1, suppressor of G2 allele of SKP1 (S. cerevisiae)	1.17836	0.236778	1.78693e-05	0.000541945	2.08543	10.0527	9.07504	10.8057	7.49022	10.6333	4.19908	17.2931	5.15867	13.1036	5.08354	6.26794	9.67864	2.8103	10.7713	13.1687	8.9011	11.5474	16.8055	12.4387	6.54033	12.7331	11.0757	7.84831	8.87266	6.29313	10.2466	9.7042	8.06069	6.56142	5.57335	4.77637	5.13676	6.55577	6.00199	5.26331	3.04502	6.82346	8.68451	6.85814	8.50552
6p22.3	NM_003107	6659	SOX4	SRY (sex determining region Y)-box 4	0.814539	-0.295945	1.79347e-05	0.000542279	51.1211	42.4273	32.5757	23.4621	37.5876	46.1478	55.5123	28.6628	16.2851	92.0182	11.1128	75.7205	85.9849	37.7595	26.9503	35.5805	98.4691	41.6943	32.8287	33.4673	40.0274	29.5472	29.8823	66.0097	74.0557	91.0938	55.13	79.7819	35.4898	132.461	133.838	145.214	34.0949	31.2081	31.1639	97.8298	113.24	101.649	64.0607	50.4382	51.762
2p11.2	NM_004836	9451	EIF2AK3	eukaryotic translation initiation factor 2-alpha kinase 3	1.28366	0.360261	1.80111e-05	0.000542944	1.90372	4.73697	3.27476	3.08746	5.09303	5.95666	2.33368	5.6149	3.87274	6.33059	2.77465	2.33914	4.01437	1.77581	5.60246	6.38737	3.5038	5.81141	6.07318	5.36301	5.20994	6.42238	6.11268	4.43976	4.29202	3.20774	5.00978	4.90426	5.56666	4.32946	4.23217	3.84571	2.93819	4.24815	3.62172	3.24005	2.31428	4.07867	4.19917	3.73644	3.35959
2p13.1	NM_006636	10797	MTHFD2	methylenetetrahydrofolate dehydrogenase (NADP+ dependent) 2, methenyltetrahydrofolate cyclohydrolase	1.15165	0.203706	1.80945e-05	0.000543815	6.37553	38.5614	32.7	32.9554	48.2776	48.8864	10.1714	18.495	42.0127	20.2806	29.3244	11.5091	16.553	4.33914	38.0568	46.8474	11.8569	33.7872	35.7396	26.6974	8.62324	21.7525	47.2911	21.5419	20.4057	12.8982	34.8885	24.867	31.8345	10.5478	10.8011	7.68377	21.0406	22.9119	26.8537	11.8028	8.18807	12.9306	36.1401	36.1765	32.5714
3p22.3	NM_012157	25827	FBXL2	F-box and leucine-rich repeat protein 2	0.8113	-0.301693	1.83608e-05	0.000550161	3.35374	6.18353	5.08059	4.31287	5.62636	5.57062	5.14345	3.20636	5.08239	5.72748	3.41237	5.63122	8.52698	2.18848	5.77343	7.00749	7.86436	4.88553	4.59993	3.09236	6.15132	10.1526	4.69068	4.47549	4.96738	4.4852	6.17597	7.17522	7.9859	13.0749	13.8116	12.4187	6.88098	6.26608	8.48745	5.43325	6.38268	7.72432	10.7947	8.54121	8.39404
3q12.2	NM_020202	56954	NIT2	nitrilase family, member 2	1.31767	0.397989	1.86848e-05	0.000558194	3.90892	4.43183	14.257	16.4107	8.58904	8.3727	4.67693	4.85647	8.39446	8.6024	6.15217	6.18837	6.31346	5.47377	11.746	13.7273	5.28392	9.77108	6.70246	4.8425	5.79356	13.0454	18.4055	7.56781	10.1795	5.55022	4.76781	7.35101	7.57778	5.66555	5.54812	4.95754	4.66546	4.92395	4.68147	4.58687	3.18535	3.32264	7.89025	5.64811	5.84441
15q25.1	NM_014862	9915	ARNT2	aryl-hydrocarbon receptor nuclear translocator 2	0.740011	-0.434382	1.92273e-05	0.000571786	12.5547	10.112	4.84129	4.03731	5.1956	6.72303	13.8098	7.00105	3.69492	6.82681	2.7441	4.05194	6.22806	6.627	6.39841	5.64111	6.34006	7.37564	4.42239	4.81855	8.948	4.53937	2.20636	4.51033	4.75321	4.41002	5.67377	12.4127	8.45399	15.4913	16.3739	18.4453	6.79753	6.02172	6.19656	11.7267	11.8421	9.42802	8.64446	9.39383	10.399
17q25.3	NM_001168	332	BIRC5	baculoviral IAP repeat containing 5	1.26677	0.341156	1.94041e-05	0.000571786	9.21678	7.78884	11.7412	17.4926	8.52896	7.89618	3.5289	20.6255	9.34905	11.3044	7.5689	6.2919	8.11863	13.3937	12.9601	13.6805	6.31748	21.5723	27.2376	21.7773	5.16142	6.35731	4.34995	8.55744	8.90679	7.76711	12.9772	22.6075	11.0572	3.76527	3.24358	3.4333	8.07722	6.9848	6.05654	8.34687	9.91621	5.17075	5.87443	9.00338	7.90593
20p11.21	NM_022080	63908	NAPB	N-ethylmaleimide-sensitive factor attachment protein, beta	0.644615	-0.633489	1.93164e-05	0.000571786	2.59438	3.41182	1.61492	1.80906	3.03717	3.65867	2.76046	3.48441	2.0358	7.76518	0.727978	9.40764	16.7282	1.67473	1.85591	3.0145	14.1202	3.54965	2.29743	2.28176	7.52852	8.53241	2.65614	8.01299	7.47971	6.88323	5.66148	7.05431	3.23113	22.9404	23.9752	20.8332	4.64946	5.05268	3.98939	4.9297	5.92142	8.89881	7.39058	5.88509	6.90725
2q37.3	NM_005855	10267	RAMP1	receptor (G protein-coupled) activity modifying protein 1	1.57627	0.656517	1.94263e-05	0.000571786	5.70532	4.0417	16.9974	15.9365	10.822	5.02468	3.74279	5.55053	9.23573	2.6228	12.3411	1.9484	2.39406	4.67286	13.5998	10.3389	1.84238	5.69018	3.75542	6.34362	4.87915	2.25261	8.79271	6.59476	5.17385	5.10016	4.82154	3.58145	2.96917	1.33568	1.88272	1.5102	1.20032	2.27772	2.3186	1.3913	1.4076	1.17248	3.65717	4.78757	4.91121
1p31.1	NM_030965	81849	ST6GALNAC5	ST6 (alpha-N-acetyl-neuraminyl-2,3-beta-galactosyl-1, 3)-N-acetylgalactosaminide alpha-2,6-sialyltransferase 5	0.700918	-0.512682	1.93055e-05	0.000571786	2.54412	3.68113	2.91135	2.71913	3.32809	3.06051	4.53549	3.32843	1.41097	6.97922	1.20323	3.21026	3.86528	2.54137	2.93586	3.40919	4.45378	4.08628	3.77861	3.44015	2.4943	3.17788	1.0626	3.23171	5.03371	4.0698	5.2712	7.7839	5.93243	6.73669	6.15749	6.06801	3.28389	2.89535	3.1752	4.7031	6.93816	5.4814	6.93342	5.22127	5.32825
5q31.2	NM_004661	8697	CDC23	cell division cycle 23	1.12254	0.166762	1.9512e-05	0.00057262	4.67674	8.34519	11.551	12.4858	11.8136	12.4774	4.59451	17.4598	10.8798	14.0922	7.4679	5.97726	9.88485	3.98215	17.4773	18.8708	7.21512	14.7083	19.0274	13.9468	10.701	16.0695	21.0337	10.9393	10.1022	7.45658	13.9671	15.0964	16.0262	7.45957	7.94385	6.99425	10.3058	12.0181	11.9949	6.67304	5.95817	9.08753	11.6541	10.7559	11.6346
6q22.1	NM_021648	23270	TSPYL4	TSPY-like 4	0.808226	-0.30717	2.00815e-05	0.000587606	16.86	15.6265	10.5107	6.89497	11.2178	14.0499	19.4405	10.7542	8.8169	18.3132	6.45265	15.3975	18.7229	12.8925	12.1412	12.3409	22.3674	12.4259	10.8093	11.5743	13.5971	11.9196	5.35356	15.945	16.4376	17.8571	13.7936	17.7793	15.1222	22.6705	24.172	26.3014	16.4131	14.4274	15.101	21.5479	22.912	17.8763	13.2416	15.1578	15.7004
1p36.13	NM_001032363	440574	MINOS1	mitochondrial inner membrane organizing system 1	0.820771	-0.284948	2.05317e-05	0.000597276	1.49792	2.57465	2.06713	3.14846	2.11869	2.57642	1.8464	1.38757	1.8959	2.41335	2.32716	1.62896	2.07477	1.11205	4.11912	3.64943	1.51861	2.61155	2.66264	1.86299	1.41097	2.94277	3.17713	3.62493	2.75784	2.2624	2.63267	2.87729	3.09131	3.65157	3.765	3.37563	2.91407	2.96671	3.36972	1.8232	2.00505	2.06019	4.03683	3.55295	3.84203
17q25.1	NR_038111	100507246	SNHG16	small nucleolar RNA host gene 16 (non-protein coding)	1.0492	0.069292	2.05255e-05	0.000597276	21.3516	30.9014	57.7817	61.7125	44.8264	40.5364	23.0014	40.8722	34.4371	46.6783	24.1035	26.4436	36.6401	22.5121	39.4475	53.11	27.0754	51.6652	41.6624	34.4242	29.8002	41.2731	41.308	27.7803	33.1914	33.1083	31.3109	35.594	36.2895	20.5438	18.5718	17.5396	33.1845	28.7957	30.9221	26.4714	28.1754	27.348	50.5941	41.2119	43.4517
16q21	NM_016284	23019	CNOT1	CCR4-NOT transcription complex, subunit 1	1.19448	0.256384	2.08347e-05	0.000604326	5.81048	11.5099	11.6416	7.29443	12.5728	14.5964	6.63621	18.9921	12.6841	12.0116	8.04754	6.32192	10.9976	5.07519	15.429	15.6154	8.65442	18.9483	18.0036	16.3068	11.064	11.8892	19.3256	6.26043	7.53295	4.99418	14.9343	14.5948	21.0802	4.59772	7.29359	8.23845	11.0332	10.0416	10.3412	6.94559	5.90017	5.844	12.9216	11.2077	9.90121
15q14	NM_018454	51203	NUSAP1	nucleolar and spindle associated protein 1	1.36025	0.443868	2.09593e-05	0.00060618	2.39698	5.3863	9.55306	5.74789	6.4998	8.00361	1.916	23.738	2.53877	9.99334	5.00528	6.42228	10.9129	3.97189	8.65171	13.0419	9.9606	10.7662	15.1269	14.9615	5.01443	8.00748	3.68103	4.39477	5.62276	2.47283	12.1157	14.5334	10.5971	2.204	2.39867	1.92815	5.57497	8.19243	7.15342	5.25831	5.77203	2.66633	6.12801	4.94976	5.50063
8p11.21	NM_020130	56892	C8orf4	chromosome 8 open reading frame 4	1.93024	0.948779	2.13056e-05	0.000614415	0.458318	0.612818	9.44878	8.15369	3.39893	2.99542	0.391189	2.7936	2.51181	3.69917	1.84856	3.44308	3.49503	1.45434	7.17469	8.30858	2.71466	4.71598	6.16889	7.14475	1.52068	2.47099	14.8186	5.70527	5.57465	6.61089	1.26518	2.17538	2.44118	0.438391	0.706737	0.702081	0.246563	0.586342	0.377717	0.723572	1.07193	1.2207	2.89688	3.72671	2.31386
11p11.2	NM_002334	4038	LRP4	low density lipoprotein receptor-related protein 4	0.716618	-0.480724	2.13751e-05	0.000614641	4.97424	4.29781	11.7959	5.53819	6.82162	7.69438	8.89061	1.7921	8.12031	4.52753	5.76914	2.39471	4.08948	3.42899	8.31668	8.61269	4.79105	8.18753	5.89272	5.85842	6.03456	3.08564	11.7731	8.37139	8.57766	7.74498	7.31212	5.67741	4.72331	13.8556	14.1025	15.1776	11.783	8.70228	11.8134	19.5997	15.0841	16.0469	10.7145	10.446	10.0724
2q11.2	NM_025190	57730	ANKRD36B	ankyrin repeat domain 36B	0.68635	-0.542983	2.17575e-05	0.000618935	1.68887	3.21381	1.39732	1.50719	2.87646	5.09672	2.5857	2.83511	1.31807	8.45945	1.33365	6.20771	8.70917	1.88108	3.19843	3.35086	8.29006	2.3215	3.06376	2.59828	4.19922	7.23407	1.56392	5.56702	5.11809	4.71991	6.95995	5.07853	5.58734	9.65347	9.06903	9.15091	5.09522	5.51998	4.79902	9.06957	4.244	8.5657	4.71359	4.1425	4.33957
17q22	NM_004375	1353	COX11	cytochrome c oxidase assembly homolog 11 (yeast)	0.648349	-0.625157	2.18547e-05	0.000618935	3.04466	5.4866	4.65271	3.7887	2.75543	4.49326	2.38407	1.59491	1.3338	6.42731	0.903145	3.26815	2.73353	1.549	3.415	4.20343	2.27241	2.95987	2.09179	1.32151	1.25332	3.20471	5.83327	7.86707	8.18412	7.79403	3.74128	7.30778	4.64109	4.08258	3.58302	3.00389	3.39261	3.68202	4.12517	3.67659	5.28185	3.88819	6.5781	6.06203	5.87265
1q42.12	NM_018212	55740	ENAH	enabled homolog (Drosophila)	0.756979	-0.401674	2.18042e-05	0.000618935	3.0565	5.53575	3.86487	2.87062	4.93102	9.34613	3.83473	4.98512	3.06943	11.5391	2.59159	4.18904	7.33325	1.94709	5.31072	6.46834	6.82249	6.53074	7.67545	7.01344	4.53379	3.6959	6.50583	6.48786	7.02313	5.30697	9.28256	9.22701	9.56392	8.423	8.58372	8.36434	8.72326	9.56389	7.80198	7.4466	7.89181	9.05814	9.04935	6.45761	6.87806
3q13.13	NM_001243288	25945	PVRL3	poliovirus receptor-related 3	1.2424	0.313134	2.16849e-05	0.000618935	1.6777	3.71047	6.06024	6.28233	7.49494	8.72329	2.45034	13.7278	6.23749	8.23981	4.53596	2.86968	4.18447	3.08518	12.4896	12.2396	3.84518	9.68766	12.4511	10.9921	3.45895	5.87977	6.61404	3.98128	4.18097	2.39226	7.39849	6.85201	6.98842	4.21868	3.87275	3.87578	4.12365	3.39779	3.8122	6.16575	5.7325	8.46723	5.29442	4.08572	4.37487
16p13.3	NM_024339	79228	THOC6	THO complex 6 homolog (Drosophila)	1.29836	0.376687	2.1697e-05	0.000618935	15.8283	13.0999	15.4844	18.5175	11.6494	9.28273	11.617	14.8809	20.6979	7.79456	23.9953	4.99592	7.38052	14.4863	16.4983	13.9499	6.5497	17.7976	17.3073	18.2606	11.2613	6.24007	13.113	11.064	10.5128	8.63534	6.10799	9.72068	9.83759	4.66298	3.7381	3.88281	9.59719	7.32883	7.79388	6.20497	7.59041	5.25299	8.12234	9.6755	12.764
1p32.3	NM_015913	51060	TXNDC12	thioredoxin domain containing 12 (endoplasmic reticulum)	1.05983	0.0838307	2.18966e-05	0.000618935	8.97826	19.0779	32.4843	33.1243	25.4097	24.1579	10.3153	23.8756	18.7557	18.2306	16.5149	11.7581	14.2058	7.92697	28.8964	32.6821	12.9244	26.2317	23.8833	19.7084	17.0918	27.9926	26.1937	17.4231	23.1813	18.4187	25.8654	23.3063	22.1873	13.0526	11.5093	11.1209	22.0155	21.3706	23.4794	10.989	14.1004	14.0307	19.3099	19.1656	18.6569
4q32.1	NM_001039580	79884	MAP9	microtubule-associated protein 9	0.715977	-0.482015	2.20759e-05	0.00062224	2.17777	5.11071	2.02544	1.46277	2.98295	4.45951	2.93852	5.20373	1.9266	9.88209	1.40364	4.72165	5.53408	1.48448	3.75115	3.95515	6.86118	2.73644	2.97886	2.67409	3.54159	6.78627	4.42364	5.59888	4.45978	3.95209	5.59299	5.61721	8.29575	5.85752	5.68275	5.73249	3.25372	3.98403	4.00958	4.05581	3.82564	5.6871	7.02772	6.10006	6.68149
7p14.3	NM_002047	2617	GARS	glycyl-tRNA synthetase	1.1318	0.178618	2.21771e-05	0.000623334	12.9033	48.1957	41.6268	43.6367	63.8321	63.3189	29.4589	36.0304	56.1327	42.3138	43.8455	24.5624	37.8122	13.1464	51.0488	48.5928	37.2865	49.7545	43.5799	36.3973	28.6195	38.6575	66.9041	30.467	29.7626	21.6667	42.0864	31.6133	37.9963	31.4646	27.8775	30.5791	25.0995	26.2013	29.2054	19.4659	14.0473	23.5831	43.8339	40.0039	39.2141
9q22.33	NM_001333	1515	CTSV	cathepsin V	1.53241	0.615804	2.24302e-05	0.000626807	0.313912	1.28487	6.79406	6.26101	4.99718	4.08456	0.575842	0.000104	3.86799	1.31569	2.76642	0.319385	0.722841	0.672788	5.708	5.96178	6.6e-05	6.5838	8.63986	6.10331	0.538496	1.2327	11.419	3.04	2.30139	1.90243	4.21341	0.555839	2.47866	4.2e-05	0.416784	0.444262	1.2327	1.44503	1.29346	0.56169	0.60121	0.853511	4.72192	4.45527	3.24921
5p13.2	NR_046262	646719	LOC646719	uncharacterized LOC646719	0.782775	-0.35333	2.25336e-05	0.000626807	2.00322	2.7947	2.72591	2.31291	2.85044	3.81476	2.55659	2.87405	1.48796	8.07738	1.4216	6.13058	6.75414	1.97089	2.56807	3.56779	6.09931	2.25587	2.68024	2.33535	3.16388	3.83645	2.35933	4.94953	4.66376	5.14759	3.58749	4.72935	3.24662	10.5121	9.90825	10.1785	4.49658	5.1766	4.84542	4.5461	5.04902	5.36384	4.38802	3.83894	3.89218
17p13.1	NM_183065	84314	TMEM107	transmembrane protein 107	0.774394	-0.368861	2.25311e-05	0.000626807	5.74473	7.01494	3.52439	5.32491	3.53023	3.21581	7.22389	5.11249	3.79886	6.34404	3.49622	4.44912	4.85958	8.61285	6.17288	6.63509	3.85022	5.11565	3.44798	3.22133	7.12355	9.64014	2.8839	7.48327	6.65461	6.77555	6.31489	9.40918	9.00662	7.67443	6.63947	7.58739	4.23913	4.47467	4.44947	6.10928	8.31294	5.87348	8.36041	9.64347	7.77629
9q31.1	NM_032342	84302	TMEM246	transmembrane protein 246	0.77042	-0.376283	2.2552e-05	0.000626807	7.52419	8.94854	2.15547	3.0797	4.38542	5.57833	7.5746	4.96571	3.05471	4.85752	2.28572	6.3345	7.77152	3.33495	3.47894	4.85547	8.18689	4.65204	3.55146	2.98974	8.93341	8.37456	1.31953	4.07608	5.20265	4.74061	5.21344	9.1674	6.12196	14.2058	15.2635	14.1256	6.00847	5.54402	5.30296	7.46732	8.26194	8.33871	6.65727	6.36029	6.83021
13q34	NM_017817	55647	RAB20	RAB20, member RAS oncogene family	1.8518	0.888925	2.26457e-05	0.000627663	3.49696	3.6108	5.53825	5.02802	4.09622	3.97168	2.41303	0.973161	5.51072	0.834151	5.12164	0.537501	0.638917	1.0437	5.60453	5.45935	0.484987	5.24986	5.41633	5.09129	2.85413	0.659641	4.44042	1.51644	1.53759	1.53935	1.32211	3.01987	1.71713	0.668805	0.484729	0.758219	2.18137	1.28337	2.12016	1.19062	1.18571	0.817656	2.80964	3.3555	2.65081
15q23	NM_018003	55075	UACA	uveal autoantigen with coiled-coil domains and ankyrin repeats	1.46649	0.552367	2.27157e-05	0.000627859	1.10887	2.37883	4.13244	1.62335	2.83143	4.40609	1.47168	1.32129	3.98646	0.983288	3.20657	0.416625	1.62568	0.658388	4.63643	3.3924	0.712042	3.11777	3.10297	2.78551	1.73026	1.26341	5.01487	1.3976	1.43154	0.77587	4.20733	3.24696	5.58313	0.318578	0.248724	0.480577	2.95314	2.81431	2.54985	0.969399	0.965988	0.978891	2.31927	2.74537	2.77801
9q34.2	NR_015427	266655	LINC00094	long intergenic non-protein coding RNA 94	0.887469	-0.172231	2.29885e-05	0.000631899	7.86499	8.4195	5.84431	5.59276	6.19367	6.09818	8.06466	4.65275	6.8597	8.68545	5.58682	6.32341	7.58796	7.11054	7.13879	6.55605	8.43092	6.47166	5.13183	5.68382	7.84207	4.80837	5.68569	6.66651	6.89268	6.8029	6.86473	6.99025	5.68233	8.32888	8.39206	8.52176	8.89877	7.53053	8.95357	7.63947	8.30245	6.6633	7.59296	7.68181	8.10315
3q25.31	NM_007107	6747	SSR3	signal sequence receptor, gamma (translocon-associated protein gamma)	1.09598	0.132216	2.29754e-05	0.000631899	13.7112	49.3598	61.3368	66.3154	51.4535	49.2268	17.736	28.0285	35.2656	26.3365	33.8162	19.5031	20.8917	8.98314	53.6159	71.9702	20.2904	46.2261	39.692	32.5609	18.9396	39.2	58.4585	34.1892	40.9591	30.2269	33.705	37.9704	34.541	23.6672	21.3052	18.4141	19.7856	22.3208	24.1731	18.291	24.051	25.2735	37.5269	32.1906	30.3806
2q33.1-q33.2	NM_001204	659	BMPR2	bone morphogenetic protein receptor, type II (serine/threonine kinase)	0.859607	-0.218251	2.3061e-05	0.00063215	4.12767	10.368	6.6644	3.93508	6.18065	9.82662	6.46501	3.62565	6.20669	8.05469	3.90081	6.53264	8.95482	2.80179	5.34572	6.74666	10.3746	5.83044	5.40278	4.7399	4.74304	5.45036	8.85498	6.68363	7.48859	6.75406	8.14948	7.80664	7.34622	9.84242	10.1529	10.4701	7.89934	8.10675	7.41025	9.3743	10.2388	8.83487	7.57018	7.55916	7.52425
15q13.3	NM_017762	54893	MTMR10	myotubularin related protein 10	1.30956	0.389087	2.34308e-05	0.000640528	0.816866	3.83514	3.45395	2.78362	3.152	3.4279	1.40871	3.05156	2.79179	4.07037	1.74809	1.89626	2.78904	0.806883	3.4668	4.20457	2.63998	3.28029	3.46251	3.25311	1.32203	1.9155	4.35039	2.76691	3.02004	2.25875	3.11812	2.65551	3.15855	1.37001	1.63007	1.53632	2.12823	2.21855	2.42501	2.00314	1.61937	1.75978	2.80509	2.373	2.28494
17p13.1	NM_004589	6341	SCO1	SCO1 cytochrome c oxidase assembly protein	1.11678	0.159341	2.3537e-05	0.000641674	4.74549	9.59679	11.8276	14.8521	11.1935	10.2254	5.54998	8.96363	9.92861	10.1969	8.22031	5.00898	7.33708	3.65252	12.0424	14.9811	8.12978	9.94496	14.2399	11.4041	8.29597	12.3965	15.3064	9.53382	10.8712	8.04826	9.34104	7.74226	9.34976	7.37099	5.96288	6.29343	6.4575	9.16357	8.14874	4.97799	4.6383	6.06845	9.82453	9.29434	10.3636
1p34.2	NM_201542	112950	MED8	mediator complex subunit 8	1.17334	0.230625	2.36415e-05	0.000642766	8.91074	14.1353	16.9496	9.76436	15.3328	15.8204	5.30862	19.6471	17.5724	12.686	10.6392	4.35508	8.64176	7.6308	19.4438	17.7259	7.81538	15.9249	13.9359	11.9903	13.5357	19.3831	20.6244	10.7056	14.0931	11.4674	13.4528	20.4909	16.8764	6.80001	7.58846	4.70713	10.6254	11.0494	11.5341	7.3425	6.44588	7.13093	12.2014	13.8405	12.8918
17p13.1	NM_021210	58485	TRAPPC1	trafficking protein particle complex 1	0.896637	-0.157403	2.40979e-05	0.000653394	27.1981	25.9485	30.7538	17.054	15.4055	20.6665	28.7895	39.0252	32.8797	27.2495	25.6733	19.1876	21.1725	12.1398	42.7006	30.898	26.0869	25.5691	24.767	27.7852	34.1863	18.9335	36.6736	31.7248	33.8241	29.6567	27.7441	38.3334	32.2602	35.0123	32.9475	27.8349	29.3745	24.3278	33.2346	28.0223	16.2592	24.6108	31.2862	33.332	37.592
16p12.1	NM_032626	5930	RBBP6	retinoblastoma binding protein 6	0.741105	-0.432251	2.41796e-05	0.000653832	6.89254	4.9423	3.60275	5.00049	1.72955	2.59032	5.94864	6.95654	1.02405	4.17876	2.14402	2.84308	1.87917	6.95531	2.25998	3.59843	2.67102	3.12488	3.0194	6.37342	2.26198	6.15467	4.67098	7.258	6.43054	7.52241	3.85589	4.72074	4.52878	4.63503	4.37104	4.3691	4.21027	3.37877	4.69418	7.77285	6.79782	6.40469	3.19394	3.39949	3.79234
22q11.23	NM_001084393	100037417	DDTL	D-dopachrome tautomerase-like	1.73787	0.797319	2.45463e-05	0.000661953	3.506	4.87383	4.44418	4.88521	3.17516	2.40293	4.41657	6.32808	6.25427	2.23261	4.02863	1.76249	1.63485	3.91618	2.66373	2.41849	1.97142	3.96175	2.86901	4.40992	5.68665	3.69216	3.76573	1.70041	1.79245	1.67953	1.68283	2.1884	2.2273	1.61212	1.37246	2.33375	1.28027	1.42792	1.44841	1.82587	1.84611	1.29161	1.9005	2.8195	3.67051
15q26.1	NM_001113378	55215	FANCI	Fanconi anemia, complementation group I	1.33175	0.413325	2.51537e-05	0.000676506	1.99915	3.68516	4.06302	4.21428	5.10739	4.70419	1.37816	7.34441	4.68363	8.45768	3.91314	2.83161	6.1677	1.22689	8.23431	6.16675	4.64141	8.48717	10.9667	8.53544	2.44641	5.49876	4.85709	4.10071	4.2327	3.57681	6.48897	7.72652	8.96216	2.20644	2.16521	2.16438	3.79115	3.74478	3.69259	2.55601	2.19551	2.90217	3.50818	4.80593	4.31282
6q25.1	NM_001242768	25902	MTHFD1L	methylenetetrahydrofolate dehydrogenase (NADP+ dependent) 1-like	1.24853	0.320228	2.60389e-05	0.000698432	2.6061	6.42932	7.00305	4.33718	5.46127	7.00282	5.6739	5.98473	6.83943	4.08097	3.77776	2.23046	3.85987	2.48223	9.05824	8.76656	3.07549	6.83336	6.8134	6.06803	3.40104	4.00695	10.509	4.5892	5.46881	3.94334	6.36356	5.66721	5.48595	4.64037	4.2775	4.27006	3.30227	3.53422	3.36682	2.82526	2.6651	3.68227	6.50576	6.30295	5.14164
6p21.1	NM_018426	55362	TMEM63B	transmembrane protein 63B	0.872155	-0.197344	2.62312e-05	0.000701703	22.976	13.221	14.8569	11.21	14.0563	12.6288	25.3571	7.91356	17.1743	13.4405	13.4141	15.8619	18.3375	13.2381	15.6971	14.794	19.6969	14.1952	9.19496	9.80634	18.3096	10.004	10.6307	13.5248	14.1416	14.4047	13.6749	12.2447	10.529	24.8039	26.2864	28.3648	15.8597	13.8769	16.3463	16.9272	15.3653	15.4028	17.8463	18.8336	19.9866
9q32	NM_004888	9550	ATP6V1G1	ATPase, H+ transporting, lysosomal 13kDa, V1 subunit G1	0.923054	-0.115513	2.71538e-05	0.000717135	47.9813	45.8505	68.3652	61.1434	49.7814	44.7029	40.0345	56.2368	43.3161	52.1263	31.3332	32.4494	33.5871	49.8206	53.4003	59.8847	30.3764	51.852	48.6397	36.1914	31.8496	66.9023	77.1155	69.5984	65.2259	62.3412	54.9697	67.091	55.2373	46.6854	41.7953	40.7029	61.0419	57.4764	66.1797	39.5958	57.3036	45.3674	54.7853	52.5222	49.7525
17q11.2	NM_001267776	90410	IFT20	intraflagellar transport 20 homolog (Chlamydomonas)	1.14215	0.191758	2.70016e-05	0.000717135	2.78276	11.448	15.2711	18.8315	13.9738	11.7714	8.02065	12.6496	13.7005	10.3736	9.52194	5.02942	4.23767	4.16141	16.7878	19.1741	5.61459	10.4311	8.90585	9.34571	5.71433	11.5719	20.5027	9.60565	14.4032	9.94995	10.7984	11.152	13.0593	4.32429	2.18365	3.79296	7.59232	10.452	10.017	4.93767	4.37753	6.03745	15.4269	11.8493	12.1939
3p21.31	NM_000884	3615	IMPDH2	IMP (inosine 5'-monophosphate) dehydrogenase 2	1.04374	0.0617562	2.68985e-05	0.000717135	105.77	97.45	180.308	119.465	159.771	126.588	88.074	242.454	180.831	102.556	118.93	64.4858	95.5369	97.3525	176.475	158.68	79.3567	219.445	169.118	146.233	112.09	139.195	138.848	102.945	124.181	117.717	109.736	144.884	125.174	64.8569	63.4079	59.7106	109.967	97.667	105.552	85.2316	87.0815	84.4295	128.297	129.297	125.557
1p12	NM_006623	26227	PHGDH	phosphoglycerate dehydrogenase	1.0803	0.111438	2.7054e-05	0.000717135	70.1137	101.244	72.1884	73.1358	67.5846	65.8425	71.4912	36.3409	98.7404	44.9267	101.606	25.7587	33.5223	71.8089	82.9178	75.1234	36.0622	96.3186	78.9735	71.6502	48.664	29.8316	61.7605	40.8062	42.699	37.3752	46.2895	51.2897	50.992	25.0683	23.7886	26.2971	43.1939	36.1256	42.4345	34.6285	40.2009	28.1004	52.3382	70.0149	72.3039
16p11.2	NM_002773	5652	PRSS8	protease, serine, 8	1.67513	0.744275	2.71675e-05	0.000717135	5.11518	2.18087	39.768	31.9821	20.3827	13.9695	4.93745	0.745811	25.0676	1.47854	21.1549	0.699835	1.13083	1.17385	22.7745	24.0865	1.26362	25.1108	24.5449	32.0659	2.87267	1.57659	70.0834	2.77696	3.97046	2.35431	4.99297	2.69652	4.89316	0.219148	0.173026	0.359141	4.34631	4.3791	5.47965	2.50559	0.977488	1.44934	5.73473	8.55036	8.45419
10q25.3	NM_198514	374354	NHLRC2	NHL repeat containing 2	0.767226	-0.382277	2.74192e-05	0.00072187	1.8092	5.23517	3.0897	2.68617	3.2251	4.39217	2.34369	3.35515	2.81286	5.60858	1.68739	2.74568	3.53762	1.12913	3.71428	4.00943	3.90948	4.35583	4.57798	3.50557	2.10888	3.38279	4.70732	4.99757	4.61106	3.92727	5.08269	5.19272	6.31786	2.92955	3.16735	3.37703	4.65242	5.2344	4.4754	4.99223	4.53158	6.12946	4.85614	5.22047	5.01775
22q13.31	NM_001099294	85352	KIAA1644	KIAA1644	0.762425	-0.391333	2.82129e-05	0.000740812	4.08627	3.40885	2.99591	2.06257	2.87806	3.08601	6.82212	2.22735	2.22003	5.1596	1.89287	3.9282	5.98874	4.83214	2.42091	2.51977	6.70877	1.96634	1.23358	1.33854	5.63597	1.20977	2.51362	3.81298	4.28698	5.14479	2.1005	2.90179	2.99119	7.64517	7.64862	7.97989	2.94758	2.18258	2.28533	4.87718	3.76203	3.76267	3.70242	3.52339	4.32415
1q22	NM_004428	1942	EFNA1	ephrin-A1	1.6801	0.74855	2.89741e-05	0.000758801	5.14211	4.49676	23.8041	22.2853	14.2819	7.78472	6.12044	1.24052	20.0486	2.16452	16.7736	3.07236	2.4496	4.33483	18.7776	15.3307	2.96039	18.2006	19.4277	19.3691	4.42044	4.95191	31.3989	4.77516	3.81648	4.63693	6.92031	5.62824	7.96069	1.01785	1.50243	1.36372	6.92299	5.3499	7.51627	3.1202	2.90885	3.25177	5.71694	7.16683	6.73966
4p15.31	NM_022346	64151	NCAPG	non-SMC condensin I complex, subunit G	1.33068	0.412165	2.91151e-05	0.0007605	0.719053	2.44381	2.55416	3.29159	3.96828	4.54491	0.703794	3.93201	2.83177	5.52553	2.13216	2.74364	4.24308	0.940528	5.86452	5.39015	3.72963	4.40184	8.66977	6.4032	2.08526	4.14537	2.03406	2.97317	2.50867	1.97492	6.91366	6.32445	6.16914	1.48574	1.58939	1.44261	2.23224	2.54619	2.17898	2.72509	1.99096	2.81103	3.22977	3.2428	3.29816
19q13.11	NM_001285829	1050	CEBPA	CCAAT/enhancer binding protein (C/EBP), alpha	1.63536	0.70961	2.95117e-05	0.000768593	4.30813	3.36265	13.7688	15.9591	7.23346	4.33408	4.57512	2.02794	8.56789	0.990259	11.3105	1.30593	1.51949	2.66459	6.90583	6.56182	1.42088	7.24749	6.62217	8.42577	4.54704	3.45114	8.10406	3.8222	3.70736	3.82661	2.97675	2.4749	2.57625	1.94559	1.9224	1.87063	3.74499	2.66384	3.99159	1.85198	1.68559	1.49532	2.01001	2.29593	3.55527
20p11.23	NM_020343	57186	RALGAPA2	Ral GTPase activating protein, alpha subunit 2 (catalytic)	0.839789	-0.251902	2.95791e-05	0.000768593	1.48131	2.41179	2.42635	1.74941	2.42734	3.51302	2.89464	0.763619	2.18018	3.52653	1.34954	2.41006	3.71903	1.50477	3.44691	3.64375	4.37238	2.6951	1.36992	0.988607	2.15214	1.66983	2.75259	2.70024	3.0108	3.11978	3.75822	2.45601	3.25668	4.36913	4.46404	4.54782	4.209	4.50014	4.06019	3.27643	2.41036	2.69159	2.92697	2.88623	2.96728
14q32.11	NM_001102368	80017	C14orf159	chromosome 14 open reading frame 159	0.78871	-0.342434	2.97961e-05	0.000772223	6.70332	4.05545	5.20596	3.54365	1.83588	2.73183	6.86835	1.77205	5.08189	3.99025	5.07894	2.43581	2.98503	5.44794	6.02908	4.80405	2.78558	4.73878	3.5487	2.87017	4.72005	4.05456	3.65081	3.83555	4.92373	3.97683	3.12498	4.21282	5.71709	6.66977	5.86005	5.76585	8.28862	7.39094	7.55208	3.66043	3.8986	2.43553	5.81383	6.33076	6.2643
10q24.32	NM_001136200	119032	C10orf32	chromosome 10 open reading frame 32	0.78837	-0.343056	2.99328e-05	0.000773754	5.76719	8.02833	5.50439	6.4324	4.88823	5.22427	4.59352	1.73961	2.36679	4.57935	3.35054	3.02013	3.56406	3.88522	4.02838	7.28554	2.96345	4.33409	3.6905	2.242	2.82114	5.83413	6.46633	6.65819	6.05388	5.54469	4.90872	9.48066	7.61263	7.4713	5.79296	5.84775	4.9394	4.89333	4.66035	6.24459	9.93526	5.51491	6.95824	5.79096	6.13531
14q32.31	NM_032630	51550	CINP	cyclin-dependent kinase 2 interacting protein	1.08521	0.117976	3.00578e-05	0.000774978	14.3696	16.3279	17.9503	19.9269	16.0678	15.1723	12.8221	24.1677	15.6439	12.5383	12.7727	14.0856	14.1343	11.6904	18.792	20.8343	14.2155	17.7554	17.2821	15.4621	16.7761	25.8119	15.6209	15.7545	22.5701	17.0954	15.6921	15.9613	14.1835	11.2533	12.1036	9.54761	13.2549	13.5354	13.1408	9.1901	12.8009	10.7251	14.5869	15.8527	14.433
12q24.31	NR_002809	338799	AC084018.1	uncharacterized LOC338799	0.772448	-0.372491	3.02674e-05	0.000777827	2.67611	2.15643	2.55281	1.74754	2.30875	2.35703	2.10746	3.22127	1.45124	5.14217	1.25655	3.01221	3.35678	4.01465	3.19745	2.42816	3.15472	2.00877	2.4795	2.26444	4.81477	4.12579	2.16766	5.52824	5.46245	6.53539	3.88908	5.2047	3.62258	3.50585	3.94536	3.90228	3.80751	3.72123	3.47962	7.02131	4.60939	4.73727	3.08133	2.79831	3.35741
1q21.3	NM_018178	55204	GOLPH3L	golgi phosphoprotein 3-like	1.10095	0.138745	3.03242e-05	0.000777827	2.97721	6.90852	5.86679	6.74203	5.70459	6.50905	3.69583	7.78301	4.70725	7.17397	3.95376	3.63069	4.35588	2.40912	6.61703	7.57798	5.26158	8.37683	9.14955	9.66824	4.65687	5.99866	9.14103	4.36229	4.50272	3.51882	6.85592	5.94193	6.90351	3.3792	3.21322	3.59286	5.71031	6.12579	6.12831	3.59776	4.27454	4.9677	6.40336	5.68911	5.90787
22q12.1	NM_005080	7494	XBP1	X-box binding protein 1	1.03756	0.0531942	3.09293e-05	0.000791314	35.9322	59.4196	83.0293	75.9937	63.3592	56.5564	32.2647	56.6815	56.3502	33.557	56.3494	18.0479	20.5385	32.2326	67.4482	73.3319	20.0412	68.5806	59.8146	56.4245	36.4676	50.2363	61.7653	67.4704	62.9692	50.4782	47.9138	52.311	41.9162	24.091	21.1738	20.4816	45.2885	34.1048	49.5029	30.0229	31.3582	32.0907	54.6522	55.4568	50.6656
7p15.3	NM_001031710	55975	KLHL7	kelch-like family member 7	0.712983	-0.488061	3.14002e-05	0.000801306	3.02304	6.16516	4.63826	3.84251	6.14817	6.65569	4.45093	5.73818	3.55428	13.2751	2.94317	10.894	14.9206	1.93465	7.05552	9.2348	12.4434	5.89049	8.28247	6.41499	8.39828	18.5153	7.23761	8.99587	7.95826	8.65669	11.0357	10.9099	9.96912	21.6534	18.1829	20.3556	7.94155	9.65178	8.59719	8.43482	7.47743	10.2219	11.3021	9.07349	12.6788
3q29	NM_005929	4241	MFI2	antigen p97 (melanoma associated) identified by monoclonal antibodies 133.2 and 96.5	1.68214	0.750296	3.19742e-05	0.000813873	1.26107	3.94545	4.5669	4.44804	3.60458	3.09567	1.93595	1.13119	9.23466	0.569235	8.05262	0.347485	0.405592	0.766149	4.43613	3.42827	0.309741	2.25124	1.70951	2.06359	0.322078	0.287885	5.46205	1.41103	1.49267	1.42671	0.986781	0.953057	1.27827	0.063974	0.138783	0.090534	1.89292	1.49901	2.41052	0.916177	0.396207	0.512662	2.06585	2.66712	2.86191
17q21.31	NM_001466	2535	FZD2	frizzled family receptor 2	1.27212	0.347238	3.25634e-05	0.000826762	15.0823	32.8211	18.7318	19.5646	15.1625	12.9035	13.394	17.1816	28.1535	9.72893	26.6463	4.07181	4.99787	14.2034	21.1788	18.5829	5.03889	21.6567	18.4491	20.214	6.84509	3.92392	15.6025	10.6488	10.6149	9.60394	10.5066	8.20218	10.7725	1.4669	1.58631	1.86871	12.083	10.596	13.2191	4.73398	5.35357	4.05633	13.945	15.5257	17.2726
2q37.1	NR_003008	677775	SCARNA5	small Cajal body-specific RNA 5	0.846297	-0.240763	3.30846e-05	0.000837862	261.538	63.7211	38.0741	221.792	145.105	180.524	295.693	120.205	39.905	197.785	290.612	228.107	247.546	1090.91	70.1176	63.9506	264.209	87.924	64.8004	147.719	556.556	451.422	44.678	260.709	198.816	237.218	356.185	250.072	276.058	284.598	275.215	224.981	303.051	372.745	264.24	124.913	172.634	142.309	341.692	285.79	382.345
1p21.2	NM_015958	51611	DPH5	diphthamide biosynthesis 5	1.1635	0.218477	3.33863e-05	0.000839474	3.71881	11.1896	4.86672	10.3387	11.1431	9.85116	4.04668	10.613	7.85112	9.94708	7.0198	5.56689	11.5487	2.20699	15.0292	12.5395	6.70603	8.77172	12.9889	8.46222	6.28786	15.4586	7.02752	6.73112	6.80932	3.41192	7.5487	6.4943	10.7733	6.5787	5.29217	5.25018	7.14531	7.953	6.56299	3.91019	4.53878	7.06909	9.77452	10.8526	9.14583
12q23.2	NM_024057	79023	NUP37	nucleoporin 37kDa	1.09593	0.132162	3.34006e-05	0.000839474	3.95477	7.98281	11.0021	18.0299	10.7201	9.50044	4.05717	9.83417	8.91718	10.2396	7.57135	6.15735	7.64812	3.86451	15.5564	16.6089	5.42561	13.2659	13.5708	11.676	6.26393	13.5488	17.9487	9.66854	12.6765	8.15319	13.2245	12.6783	14.848	4.73685	4.42441	3.153	6.68021	9.35573	9.23741	4.21143	5.10876	6.83996	11.0057	9.7679	11.0796
20p13	NM_018354	55321	TMEM74B	transmembrane protein 74B	0.718345	-0.477251	3.32421e-05	0.000839474	4.39996	2.13415	0.703913	0.604886	1.81005	1.45218	5.36418	1.56992	0.760721	3.43466	0.923591	5.91594	5.54417	3.19063	1.14353	1.10718	6.61088	1.48368	0.503417	0.494588	6.76673	4.67819	0.567052	2.22257	2.44985	3.17563	1.57339	2.2707	1.65992	7.30976	7.61626	7.59695	1.32853	1.0053	0.999214	4.78942	3.54446	3.79549	2.7198	2.74042	3.03611
4q31.3	NM_032117	84057	MND1	meiotic nuclear divisions 1 homolog (S. cerevisiae)	1.50949	0.59406	3.4023e-05	0.000852968	1.24934	2.02876	3.07152	4.32353	3.09105	3.14	0.835954	8.61585	2.91158	4.44988	2.69295	1.95265	3.1152	2.48393	4.5378	4.50093	2.5126	5.34203	6.73066	5.51729	2.25783	2.97706	1.47573	2.72369	2.80177	1.52346	4.25072	4.46362	4.40239	1.93879	0.835882	0.867899	2.73078	3.48806	2.21173	1.91756	2.21242	2.08028	3.35357	2.99441	2.95481
22q13.1	NM_005318	3005	H1F0	H1 histone family, member 0	1.14167	0.19115	3.43521e-05	0.000858424	51.1558	41.2613	48.8071	54.2372	54.404	56.3053	43.4897	50.9184	56.1742	106.675	42.3654	54.363	94.0025	65.1983	58.7888	63.5527	78.9671	103.079	77.4779	83.8217	46.2796	36.2012	62.7843	55.354	58.2836	68.0649	61.8078	104.765	72.7945	32.3621	32.4747	30.6601	62.1583	42.8244	51.8698	20.0469	20.0791	21.8089	53.6067	45.4289	46.2072
1p12	NM_001080470	90874	ZNF697	zinc finger protein 697	0.859057	-0.219174	3.44126e-05	0.000858424	3.10303	3.21222	3.07179	2.1898	2.43453	3.57576	2.90746	2.60305	1.67245	5.46115	1.58663	4.16351	6.08489	1.75578	2.43924	3.27922	5.55713	3.64404	3.47497	2.71864	3.50812	3.62431	3.30337	2.925	4.02152	3.28678	2.87668	4.9502	4.33529	8.41682	8.47146	8.94496	3.14318	3.17453	3.12775	4.0036	3.61555	4.10229	4.83772	3.83548	4.13907
2p11.2	NR_004378	692225	SNORD94	small nucleolar RNA, C/D box 94	0.882159	-0.180889	3.45792e-05	0.000860426	1080.74	135.522	51.2992	985.922	439.901	447.375	1057.42	159.893	149.209	213.369	1229.31	944.822	736.067	1154.79	941.904	805.359	813.94	801.244	551.756	751.701	876.828	749.722	490.957	1374.67	899.796	745.218	166.297	662.294	349.35	1194.88	1251.6	1234.43	375.763	587.22	340.284	735.406	511.357	753.734	996.544	830.433	795.675
6p22.3	NM_001080	7915	ALDH5A1	aldehyde dehydrogenase 5 family, member A1	0.755449	-0.404593	3.47695e-05	0.000862248	2.14299	4.21241	2.13458	1.09403	2.74995	4.23032	3.81673	3.2378	1.57482	3.90181	1.09827	3.21978	5.17921	1.20982	1.86449	2.32445	5.08625	2.70146	2.13962	2.21335	4.8161	3.94785	1.46217	2.03211	2.78517	2.62153	3.28508	3.83095	4.08812	8.93882	9.37065	8.82344	3.01366	3.11842	3.18017	5.20417	4.89329	6.07822	3.40697	3.23306	2.90116
2q35	NM_152862	10109	ARPC2	actin related protein 2/3 complex, subunit 2, 34kDa	1.1797	0.23842	3.48252e-05	0.000862248	21.1044	50.4391	55.5701	56.5749	60.3345	60.5858	22.6258	35.4059	59.8716	46.4486	39.5839	28.2732	30.0041	17.4347	43.2876	68.9194	28.4451	29.9369	38.1155	43.8935	33.6656	46.9633	70.0624	22.2138	34.2531	21.3786	49.8025	26.5915	30.5723	31.7016	34.3941	33.3695	39.8319	37.3136	41.7468	11.9669	14.468	19.3651	31.4399	31.4303	44.3442
1q21.2	NM_001123375	653604	HIST2H3D	histone cluster 2, H3d	1.14851	0.199762	3.53672e-05	0.00086706	162.672	126.472	102.477	184.267	100.816	69.3323	82.5932	137.145	172.525	67.606	249.831	53.6097	50.4506	233.625	147.073	118.513	60.6588	193.067	152.618	164.123	105.829	108.737	32.5776	65.2392	72.6701	63.9562	70.6535	130.751	103.126	36.407	27.4709	34.2227	47.724	41.5014	53.8897	51.5198	78.2375	28.7321	56.1341	90.1857	95.263
10p14	NM_014142	11164	NUDT5	nudix (nucleoside diphosphate linked moiety X)-type motif 5	1.06244	0.0873748	3.51987e-05	0.00086706	12.077	17.3508	31.9013	30.5623	21.8285	19.9218	11.0964	23.9753	21.7483	18.5799	17.0518	11.9062	14.2172	13.2624	24.9959	28.4997	12.4402	23.5392	28.3682	17.5714	14.5589	24.971	26.8075	17.0244	20.4624	13.6423	22.4457	17.1211	20.5647	9.31645	10.6288	9.98622	20.6557	19.4597	22.6451	9.87305	17.7193	13.3002	20.3055	16.4641	18.2314
6q21	NM_032194	84154	RPF2	ribosome production factor 2 homolog (S. cerevisiae)	1.25908	0.332374	3.53378e-05	0.00086706	1.62998	3.34549	5.13352	5.04237	6.58677	6.82612	2.16849	6.22756	4.87813	4.77085	3.93321	2.66999	3.59311	2.01639	5.2342	6.89191	3.06036	4.96952	6.64344	5.46618	4.06542	5.86661	5.62418	6.47685	5.37953	4.41803	6.16691	4.23684	6.02689	2.91919	2.58738	3.02107	3.18641	4.231	4.09795	2.03382	1.92532	2.88996	4.99817	4.02119	4.15872
8q24.3	NM_052963	116447	TOP1MT	topoisomerase (DNA) I, mitochondrial	1.75428	0.810879	3.52551e-05	0.00086706	2.62445	3.44233	7.89017	2.95708	7.06716	5.87287	4.34973	2.01998	7.15064	4.48368	3.49753	0.000531	2.65788	2.4832	4.27393	7.04153	4.10137	7.44761	4.62863	4.04899	2.10754	0.000826	6.30794	1.54215	2.16535	3.56513	3.19763	1.20016	1.30642	1.70944	1.66428	1.73011	3.5115	3.41145	3.28862	2.25661	1.42328	1.1623	3.55784	2.3226	2.39276
19p13.3	NM_001172673	60680	CELF5	CUGBP, Elav-like family member 5	0.725207	-0.463535	3.57388e-05	0.000868749	2.88747	2.28689	1.01763	0.764609	1.59451	2.46353	4.91549	0.865703	0.768608	5.75364	0.556344	4.80595	6.91829	2.78431	1.19158	1.30118	7.42663	0.9628	0.265721	0.551716	3.88261	1.72049	0.349412	2.52423	3.08689	3.00956	1.83595	3.05802	1.17271	9.03927	9.45738	9.50708	1.75811	1.59252	1.87569	4.42703	3.92328	4.02332	2.72365	2.93232	2.9512
22q12.1	NM_007194	11200	CHEK2	checkpoint kinase 2	1.52832	0.61195	3.58261e-05	0.000868749	1.29573	2.61325	4.53181	6.3772	3.83647	3.78158	0.978433	6.35394	4.06739	3.22637	3.21873	2.47862	2.78678	2.33127	4.62406	7.13954	2.96025	5.84889	10.6626	8.72071	1.63571	4.28406	3.90022	1.58625	2.37685	2.20717	5.41627	5.85857	5.16603	1.52605	0.980184	1.58834	3.45945	4.14817	3.97807	2.86523	2.0007	1.5386	2.81619	2.66411	3.07754
16p13.13	NM_015226	23274	CLEC16A	C-type lectin domain family 16, member A	0.889663	-0.168669	3.58714e-05	0.000868749	4.37062	5.00039	3.72197	2.63765	2.44382	2.99602	5.61742	1.44582	4.0224	3.15728	2.84051	2.67591	3.08089	2.48164	2.9792	3.28308	4.69039	2.7715	2.30643	2.44033	3.64543	1.5921	3.97363	2.67841	3.61848	3.50709	3.1522	3.60003	2.7418	5.19051	5.10291	5.65252	3.74321	2.9736	3.16007	4.61027	4.33005	3.63223	3.64209	4.03483	4.10959
20q11.22	NM_003908	8894	EIF2S2	eukaryotic translation initiation factor 2, subunit 2 beta, 38kDa	1.14428	0.194445	3.55233e-05	0.000868749	9.01364	29.4815	33.0866	42.8838	40.2878	42.3508	14.7076	62.0625	41.6726	35.4964	27.9317	25.4811	34.9042	10.2436	42.9208	42.7807	30.2335	40.4845	64.531	55.4281	25.1574	46.3694	70.4154	28.944	29.9193	22.4934	36.8101	27.9422	34.4968	23.1879	20.9252	21.9988	24.9318	26.2007	26.1842	14.6246	10.1222	19.3889	32.0326	28.4028	27.6951
2p25.1	NM_024894	79954	NOL10	nucleolar protein 10	1.16122	0.215642	3.5685e-05	0.000868749	0.898192	3.67977	4.70937	3.30748	4.91675	7.19247	2.11089	5.733	3.33227	5.4666	4.30848	2.12061	4.18966	1.56334	7.6372	5.74563	3.59931	5.95366	6.94423	5.31572	3.53418	4.22601	7.95936	4.97865	4.33703	3.42073	5.3798	4.97849	6.65015	2.7999	1.96824	2.48698	4.3267	4.77163	3.09307	3.62714	2.22972	3.43212	5.57541	4.8482	4.12878
17q25.3	NM_005782	10189	ALYREF	Aly/REF export factor	1.07985	0.110825	3.63829e-05	0.000874768	45.6026	51.1262	52.9719	42.7704	41.1602	36.1268	35.2306	86.8393	54.9585	40.5676	43.5878	21.3686	27.3831	46.9364	47.6978	47.4395	20.8067	55.1111	57.5666	50.0925	37.8694	29.7498	32.5678	47.0624	49.2978	39.8818	44.8517	59.1693	32.2035	24.6193	21.4811	22.5684	28.6991	25.2554	25.7972	28.7971	30.5994	22.8177	32.0874	36.3344	36.8806
7q22.1	NM_014377	27000	DNAJC2	DnaJ (Hsp40) homolog, subfamily C, member 2	1.33092	0.412422	3.62689e-05	0.000874768	1.72524	4.51215	6.85486	3.72934	6.66946	6.62865	2.9842	7.73644	6.31155	7.5798	4.34779	3.334	6.41083	2.42709	7.75379	5.70751	4.2583	7.5259	8.85066	5.94612	4.01008	7.32893	8.50691	6.10026	5.91865	4.64022	7.86244	7.65857	9.78037	3.06162	4.15899	4.93657	3.90351	3.97242	4.5551	2.87925	1.8778	2.73265	7.01113	5.76004	5.95787
8q13.1	NM_025054	80124	VCPIP1	valosin containing protein (p97)/p47 complex interacting protein 1	0.78041	-0.357696	3.63144e-05	0.000874768	1.38907	2.98526	1.66307	1.34973	1.98554	3.48606	1.95672	2.26396	1.65758	5.29509	1.05868	1.98843	3.05606	0.877981	2.48681	2.64892	4.80493	2.8606	3.68792	2.79153	1.87607	3.23116	4.82361	4.58521	4.47283	3.60649	3.48926	3.63069	4.41611	3.8259	4.34323	4.41663	3.59958	3.42157	3.19857	3.25969	3.15862	4.37033	3.74176	3.03063	3.35313
8p11.21-p11.1	NM_152419	138050	HGSNAT	heparan-alpha-glucosaminide N-acetyltransferase	1.26018	0.333625	3.67034e-05	0.00087614	2.13392	5.30016	6.62634	4.76808	5.04599	5.05313	3.99101	2.1287	5.17358	4.32269	4.56238	2.28085	3.05873	1.42733	6.06371	6.77054	3.20401	4.82742	3.41415	2.86876	3.17283	2.13022	8.68672	3.97185	4.27738	2.55966	3.85585	3.47284	4.07076	3.3219	3.54054	3.55122	4.02966	4.27685	4.07108	3.71405	2.55981	2.82103	4.33746	4.1267	3.98469
14q21.2	NM_018353	55320	MIS18BP1	MIS18 binding protein 1	1.40308	0.488594	3.66793e-05	0.00087614	1.03144	2.10536	3.82013	2.88552	2.45457	3.08639	0.881481	3.12856	1.75311	5.73205	1.48542	1.74913	3.01805	1.0801	5.58526	4.1609	2.40007	5.86241	6.48391	4.01769	1.54347	2.86636	3.96644	1.93409	2.29012	1.27744	4.3037	5.37402	5.8606	0.684212	0.638031	0.73487	4.21681	4.3911	4.18208	1.86965	1.54916	1.79177	2.52135	2.5183	2.42484
4p15.32	NM_153365	202018	TAPT1	transmembrane anterior posterior transformation 1	0.785464	-0.348384	3.66946e-05	0.00087614	1.05965	2.55234	2.09515	1.70855	2.03568	2.36366	1.50026	1.29547	1.31833	3.23892	1.10043	2.32106	3.06078	0.553024	2.04872	3.08445	2.92186	1.34947	2.08143	1.88974	1.25725	2.17826	2.6078	2.54995	2.83708	2.30594	2.96303	2.8533	3.04141	3.82134	3.55476	2.87617	2.8065	3.30511	3.69687	1.8186	2.58439	3.02094	3.54878	2.62592	2.64282
12p12.3	NM_175054	121504	HIST4H4	histone cluster 4, H4	1.12313	0.167519	3.74151e-05	0.000890998	144.901	167.822	141.682	165.236	141.652	108.654	173.257	95.4701	204.471	60.9827	252.195	30.529	32.411	146.619	165.045	148.249	29.0594	173.207	135.32	120.209	91.0842	64.6773	77.4049	60.9788	73.8329	55.5751	112.253	103.979	94.6565	30.7298	23.7214	27.3143	80.438	74.3775	76.7981	51.5874	51.3196	44.8328	140.882	164.395	157.737
20q13.33	NM_001024	6227	RPS21	ribosomal protein S21	1.05888	0.0825401	3.76835e-05	0.000895251	568.088	1047.14	364.902	640.534	651.009	497.25	698.022	1322.82	493.359	384.089	808.977	336.097	387.544	797.881	861.513	721.264	391.844	896.465	1537.05	1688.75	545.244	523.47	486.298	607.583	589.055	510.546	334.596	525.007	567.165	337.218	301.794	292.633	395.741	330.15	378.657	272.637	305.057	318.609	511.758	619.805	671.597
22q11.21	NM_006767	8216	LZTR1	leucine-zipper-like transcription regulator 1	0.847126	-0.239352	3.79649e-05	0.000899796	12.3378	12.5364	9.99101	8.17321	7.53016	7.25288	11.6666	4.31375	11.9714	7.99337	11.1076	6.21875	6.9297	9.05411	10.7443	8.83207	7.74367	6.31037	6.54009	7.01594	10.4501	4.26503	10.8519	8.20565	7.94929	8.56336	7.18069	8.48922	7.57396	11.2494	12.6034	13.1955	10.6346	10.4919	11.6951	12.6881	10.3428	10.124	10.7817	11.026	13.623
11p15.5	NM_022772	64787	EPS8L2	EPS8-like 2	1.7087	0.772903	3.83506e-05	0.000906002	2.8897	2.22878	12.0514	10.0217	5.84817	4.5239	4.23473	2.36863	9.33104	1.38243	7.7752	1.27981	1.04059	1.95562	7.88134	7.62911	1.1118	6.99975	5.46563	8.08939	3.35976	1.7688	18.1701	2.15358	1.9316	1.95804	1.46175	1.39976	1.85952	1.19101	1.03269	1.20417	3.68306	3.39411	3.94616	1.55464	1.08459	0.964179	3.61085	4.76584	5.24983
13q13.3	NM_181503	11340	EXOSC8	exosome component 8	1.17524	0.232958	3.84084e-05	0.000906002	3.58335	7.48543	12.4539	15.1061	11.579	10.2038	5.01443	12.5436	10.8311	14.5389	7.04877	8.36528	10.607	6.28335	13.6271	15.3714	9.65728	13.3318	13.4812	10.3232	8.60912	15.6229	13.7417	9.37474	9.96067	8.94036	12.6096	14.6568	12.2344	8.94849	8.23382	6.68264	7.40164	8.63585	8.17337	7.03657	7.89311	6.5586	9.13972	8.62094	8.57081
17q25.1	NM_052916	114804	RNF157	ring finger protein 157	0.795691	-0.32972	3.85986e-05	0.000906205	8.39315	4.69374	5.25258	3.64176	4.96866	6.23744	9.72846	9.91967	2.91711	9.17053	1.96468	7.68163	11.497	7.8587	5.70868	4.79024	10.9964	6.10904	6.91075	6.49275	10.1441	5.35745	2.67377	6.86362	8.32012	8.20486	6.76586	7.90713	5.99843	18.981	20.1222	20.6834	10.6965	8.26854	9.57566	9.47057	7.9668	7.72612	5.14164	4.64341	5.81539
12q24.11	NM_130466	89910	UBE3B	ubiquitin protein ligase E3B	0.707699	-0.498792	3.85345e-05	0.000906205	1.42754	2.12006	2.97383	0.356028	1.88668	2.06577	2.30993	2.5241	5.14184	2.05015	2.65473	2.50961	1.70287	0.333656	1.52224	3.48201	2.55738	2.58307	1.83789	2.48295	0.906904	0.090903	6.16521	3.24156	2.37793	2.122	4.91636	1.07964	3.04289	4.15679	3.66803	3.7627	6.26066	4.4623	5.27075	4.56046	2.66141	3.20506	3.23437	2.88409	3.9263
3q25.1	NM_032025	83939	EIF2A	eukaryotic translation initiation factor 2A, 65kDa	1.15679	0.210132	3.90274e-05	0.000914062	4.70777	11.3091	18.6155	21.4656	20.1105	17.628	6.64535	19.8603	14.6527	15.7356	11.3649	13.0646	15.9665	5.13495	18.7056	20.5734	13.8613	15.988	21.2595	14.8357	11.4941	21.5649	20.1969	13.771	12.1397	10.6683	17.3356	14.0936	16.6486	13.2449	10.7949	10.2471	11.8818	13.6442	14.5868	7.33692	7.19022	12.588	16.0927	13.8763	13.1191
11q23.3	NM_002105	3014	H2AFX	H2A histone family, member X	1.20643	0.270747	3.91765e-05	0.000914062	54.9871	50.1923	40.8162	52.2345	30.7075	25.7044	35.9489	110.39	51.8993	28.6752	53.7762	24.3223	20.5342	72.9228	37.0921	34.171	23.839	54.0176	61.1897	73.9401	38.2948	30.0128	13.7908	27.7976	30.6708	26.5538	29.5064	38.4116	30.2055	13.5889	10.8413	17.1926	21.4067	17.4818	23.0094	18.6723	31.8612	14.644	21.284	28.6975	34.5574
9p13.2	NM_022490	64425	POLR1E	polymerase (RNA) I polypeptide E, 53kDa	1.27025	0.345109	3.92081e-05	0.000914062	2.74738	7.37623	10.2919	10.8735	10.9385	11.2031	5.81022	9.3847	13.9847	12.1435	8.96527	6.41661	13.2815	3.17512	11.783	13.2768	10.6298	12.9611	12.3735	12.5585	7.56842	12.2908	11.3044	7.73159	9.80827	7.02431	12.4472	8.53063	10.5346	10.8509	8.30902	8.86759	6.51142	8.18372	7.33327	5.49363	3.7471	5.86979	12.2618	8.43206	8.48163
5q13.2	NM_002270	3842	TNPO1	transportin 1	0.781048	-0.356516	3.98484e-05	0.000926823	6.44891	8.88156	10.7856	10.3731	9.61736	15.9451	7.27513	11.8158	4.7869	24.4348	4.90869	10.4417	17.1253	3.81147	11.1707	16.434	11.9162	12.1048	12.3192	10.8715	10.5704	21.7109	19.6355	14.234	14.1841	12.963	15.1201	17.8316	19.4622	20.4436	18.626	19.0469	15.6802	17.5048	15.7448	15.4812	16.8386	18.2474	17.1686	13.8313	15.548
16p11.2	NM_181718	253982	ASPHD1	aspartate beta-hydroxylase domain containing 1	0.707861	-0.498462	4.00338e-05	0.00092717	2.17886	0.722323	2.25407	2.67538	1.99446	2.43365	1.67737	2.01085	1.89754	1.44847	3.44832	0.999667	1.56803	2.83086	2.65208	2.79242	1.70364	1.91449	2.67901	3.2465	1.85369	2.04512	2.96624	4.5332	5.52155	4.77263	2.36015	3.2506	2.35046	4.21309	4.30805	3.91767	4.56097	3.94492	5.56551	3.25164	3.29865	2.62368	4.73394	5.51321	5.65055
1p34.1	NM_020883	57643	ZSWIM5	zinc finger, SWIM-type containing 5	0.840221	-0.251159	4.00491e-05	0.00092717	2.27021	1.53111	1.31141	0.840517	1.63411	2.1777	3.51172	1.51664	0.701745	3.70485	0.70762	2.2899	3.13602	2.27531	1.42225	1.34845	3.09902	1.79638	1.54107	1.11031	3.33558	3.2599	0.272046	1.76833	2.21324	2.35719	2.10964	2.61895	2.13893	5.09192	4.58533	5.11127	2.84604	2.90917	2.89363	3.78683	3.46297	2.89448	2.04106	2.1715	2.30893
9q21.13	NM_001025780	51104	ABHD17B	abhydrolase domain containing 17B	0.738067	-0.438177	4.07907e-05	0.000939346	2.5888	3.75043	3.8005	4.52996	2.61881	3.46364	3.14208	3.54129	0.873436	9.70222	1.70542	5.79915	5.22287	2.03778	3.9207	4.73813	4.98528	4.15056	5.16406	5.34233	3.1683	5.64182	4.72121	5.52354	8.01475	7.82357	4.81726	7.1483	5.70968	7.08023	7.19053	6.21847	3.88601	3.9164	3.95714	4.74036	7.04588	6.06436	4.64982	4.51024	4.652
17q21.31	NM_001932	4356	MPP3	membrane protein, palmitoylated 3 (MAGUK p55 subfamily member 3)	0.820468	-0.285482	4.10328e-05	0.000939346	3.21556	0.438001	1.15509	0.736813	0.976521	1.36893	2.97626	1.7911	0.00012	2.32578	0.777031	4.55696	6.34364	3.07234	0.00018	1.36189	5.32572	1.17205	1.36275	1.26547	3.08813	2.8101	0.000115	3.66871	3.37603	4.6017	2.52046	2.18521	1.46009	5.64367	6.65874	6.70593	2.19925	1.44149	1.48225	2.64193	2.83858	2.64999	1.86414	1.73071	1.03421
16p13.2	NM_000303	5373	PMM2	phosphomannomutase 2	1.23369	0.302975	4.0677e-05	0.000939346	3.72363	9.80895	13.4117	12.5874	9.35901	7.68691	5.99985	7.08822	12.4689	7.69231	8.4171	3.45738	5.40835	4.64709	12.6407	16.0698	4.43861	8.95847	9.19791	7.07383	5.81005	5.49966	19.7135	12.3483	15.574	12.8824	6.87861	8.61332	7.55091	3.76546	3.96572	3.63747	5.58777	4.82429	5.06777	5.97193	4.25294	5.06995	8.17352	7.6817	7.03169
19q13.33	NM_020650	57333	RCN3	reticulocalbin 3, EF-hand calcium binding domain	1.94298	0.95827	4.09297e-05	0.000939346	5.82971	27.0369	23.212	18.1933	43.4317	33.1805	23.7503	14.3435	53.3593	6.16238	36.9011	3.67624	4.20683	7.95079	18.8314	15.1154	3.55287	10.1467	7.4203	9.06558	12.2036	5.36789	12.0507	5.74861	5.09921	5.92279	4.08826	9.17449	7.52792	4.01751	4.15589	3.97696	3.67004	3.25298	3.81627	5.09453	4.84175	4.49928	16.5363	19.0085	21.9955
17q21.31	NM_173079	146923	RUNDC1	RUN domain containing 1	0.854407	-0.227005	4.10458e-05	0.000939346	4.50594	4.4843	3.91868	2.79049	3.9149	4.96744	5.5957	3.16531	3.03618	6.05344	2.47179	3.20728	3.28242	3.16381	4.87443	5.31976	4.8083	6.11331	4.87337	4.96154	4.40047	2.81951	4.07156	4.78154	6.1583	4.84206	4.81385	5.80537	4.59991	6.75801	6.84419	6.8413	4.83766	5.56821	5.611	6.06142	5.03951	4.70478	6.10074	5.2183	5.37055
1q22	NM_178229	128239	IQGAP3	IQ motif containing GTPase activating protein 3	1.44318	0.529253	4.13173e-05	0.000943397	2.43658	4.25044	3.48608	2.47806	2.36143	2.68663	1.92011	1.53071	4.14665	3.38463	3.17106	1.44576	1.82928	2.76641	4.14677	4.15172	1.87021	4.27276	3.43743	3.01863	1.45548	0.380647	1.54742	1.7912	1.8567	1.35598	2.84514	3.80385	2.51946	0.587438	0.544685	0.550807	2.58936	2.21008	1.96591	3.38253	2.17478	1.84234	1.6473	2.31983	2.47241
16q24.1	NM_016095	51659	GINS2	GINS complex subunit 2 (Psf2 homolog)	1.25277	0.32512	4.24133e-05	0.00096621	8.92754	12.2308	18.8717	20.196	19.7028	15.2143	6.90767	16.1568	20.7091	20.6283	13.3527	12.3999	16.0437	18.924	18.3832	20.2579	14.1521	22.7174	20.7363	18.7314	8.59188	19.0599	6.51649	14.7495	20.6874	15.5853	19.2271	23.5138	14.594	8.00397	7.51194	7.56949	11.2489	9.27787	10.2014	10.6729	11.5019	7.81141	11.3806	12.3669	11.5741
18q21.1	NM_006111	10449	ACAA2	acetyl-CoA acyltransferase 2	1.06827	0.0952762	4.25979e-05	0.000968205	7.89613	14.916	23.9256	22.1645	24.795	23.1362	10.3801	17.7294	16.6686	19.8491	16.2244	6.36106	11.8372	7.44279	29.3286	29.0355	8.35308	26.5798	29.0127	24.4325	14.2865	23.3493	33.8107	16.4269	16.9684	11.3819	25.1724	19.2938	25.9365	8.52687	7.21728	7.5952	23.6352	24.3939	25.8644	9.01144	7.32089	11.1712	22.1906	18.6766	18.0142
2q21.1	NM_025029	80097	MZT2B	mitotic spindle organizing protein 2B	1.10227	0.140476	4.30464e-05	0.000976176	71.5181	86.4058	63.2065	78.4188	68.7343	49.5577	75.8399	98.8125	85.7708	34.8178	99.4394	36.5236	33.4976	83.81	70.4106	56.0186	37.1621	64.1884	53.79	62.9689	79.1017	64.115	41.4883	48.3879	51.0458	54.4069	32.9031	40.3165	38.5239	27.2201	22.6874	28.8631	41.8225	37.5437	47.1837	31.1694	40.5468	26.3592	52.194	66.6662	78.6847
8q22.3	NM_001270377	157567	ANKRD46	ankyrin repeat domain 46	0.762786	-0.390649	4.38736e-05	0.000988276	6.02591	8.52521	8.43861	9.38169	8.46686	10.8568	6.47945	10.9065	4.0596	22.0009	4.46677	22.4237	24.2531	6.40879	9.6537	10.1823	19.7026	8.16748	9.52357	6.98396	10.3055	26.8764	7.23716	20.618	20.6509	22.8148	11.2807	17.5907	12.2686	34.2996	33.9421	27.5631	10.5765	11.3672	12.8005	12.715	22.0342	19.0828	13.1782	11.2218	11.7996
19p13	NM_003083	6618	SNAPC2	small nuclear RNA activating complex, polypeptide 2, 45kDa	1.68639	0.75394	4.38163e-05	0.000988276	5.83785	7.36618	5.83462	7.7426	5.60455	4.05058	8.93226	10.8639	13.8784	4.26154	11.6272	6.35628	3.42552	6.11211	7.40812	5.66899	7.28762	6.77743	8.71352	8.9127	7.9109	6.49848	3.29782	2.24197	1.2633	2.70296	2.65009	1.9037	3.62672	1.25886	1.91004	3.44208	3.36408	3.01662	5.2176	2.85821	1.94406	2.40528	3.95148	7.33268	9.07206
12q13.13	NM_032840	84926	SPRYD3	SPRY domain containing 3	0.812487	-0.299584	4.38772e-05	0.000988276	8.96908	11.5011	5.29535	3.49807	5.19733	5.88731	15.7112	2.39899	6.78273	5.04924	6.55492	4.68409	6.81218	4.97617	7.08399	5.6864	5.92897	3.37043	2.1576	2.79514	8.63016	4.45216	6.39921	7.45348	6.93049	7.05005	4.36268	4.41262	5.75045	12.4347	13.1686	14.2269	5.057	4.36095	5.26352	6.85448	6.52676	6.28443	7.8809	8.75407	9.11955
15q15.3	NM_005313	2923	PDIA3	protein disulfide isomerase family A, member 3	1.0637	0.0890951	4.43566e-05	0.000996824	31.8833	92.8767	85.8812	64.4049	98.5542	104.821	50.317	42.7284	106.032	46.5577	77.5535	15.9327	36.2081	15.907	108.595	91.0092	25.7079	89.3089	75.4274	71.5749	53.5814	57.0061	100.059	53.6727	54.5443	32.8526	92.3688	55.3914	72.9555	30.5072	28.0375	32.1054	55.0106	54.3543	51.9477	26.6226	21.9352	31.8516	72.2453	71.8561	73.795
22q12.1	NM_172002	150274	HSCB	HscB mitochondrial iron-sulfur cluster co-chaperone	1.16236	0.217062	4.55051e-05	0.00102034	2.79289	4.28431	5.89764	5.77829	5.31276	4.66939	3.66647	3.94283	5.22359	3.78212	3.43739	2.99211	3.33888	2.77215	6.1447	7.04536	2.90969	5.8809	6.32662	5.33632	2.62864	5.2084	5.41456	3.57977	4.90896	4.04414	4.35809	3.99922	4.71385	3.79209	2.89515	2.64969	3.3522	3.04563	3.92595	2.80779	3.14303	2.84037	5.38133	4.11169	4.81109
15q15.1	NM_007236	11261	CHP1	calcineurin-like EF-hand protein 1	1.10028	0.137868	4.59324e-05	0.00102761	10.8348	18.0968	35.6255	32.9309	25.0022	24.8021	11.4225	24.1541	21.6006	16.9329	16.6388	11.7211	18.1955	8.91014	22.6728	26.7218	14.7334	30.7103	28.7372	25.4381	16.4602	18.7044	36.8443	14.563	19.7791	15.1059	18.9749	18.8092	18.2142	16.0195	16.1866	15.744	20.3986	16.7889	22.1642	13.8468	13.9672	15.0201	19.7953	16.3582	16.0911
7q32.2	NM_018718	95681	CEP41	centrosomal protein 41kDa	0.80044	-0.321136	4.66813e-05	0.00103508	1.34481	3.145	3.01699	2.16654	2.0335	3.03802	2.36871	2.95977	2.59313	3.50899	1.54469	1.84294	1.71152	0.833263	3.05277	3.33668	1.71929	2.34576	2.32875	2.48428	1.95267	1.59759	2.17589	2.82991	2.82149	2.48249	3.78833	3.89201	3.90445	3.01106	3.56065	2.83654	2.95649	4.19615	4.22533	2.06106	2.1748	2.54705	3.88292	3.01775	3.60004
12q13.2	NM_005811	10220	GDF11	growth differentiation factor 11	0.753503	-0.408314	4.63938e-05	0.00103508	7.10572	10.1407	5.29757	3.90069	4.28654	5.38185	7.92581	4.04675	6.76123	6.33498	5.01751	2.68553	4.11534	5.58127	6.6027	5.93046	4.6275	6.51492	7.68425	6.9835	4.86061	2.57148	3.10376	3.65387	3.97052	3.68172	9.08312	6.98563	6.03316	7.94865	7.96812	10.2543	13.7579	12.8269	13.7924	7.29107	7.11405	4.86513	6.97878	6.96953	7.4382
3p21.31	NM_000258	4634	MYL3	myosin, light chain 3, alkali; ventricular, skeletal, slow	2.01775	1.01275	4.66398e-05	0.00103508	1.36645	9.63187	3.78527	4.14704	5.72829	3.83425	6.82624	0.1319	10.6982	0.415735	10.2714	0.284714	0.353321	1.3829	7.31842	4.59479	0	7.81508	3.86194	2.75974	18.4361	10.9691	3.75206	2.30094	1.83863	1.15894	1.28056	1.78135	3.18018	0.169661	0.114602	0.191859	1.7086	0.934007	1.27953	1.80686	1.85503	0.913653	2.73927	3.51573	3.01672
3q25.1	NM_014445	27230	SERP1	stress-associated endoplasmic reticulum protein 1	1.05585	0.078409	4.64997e-05	0.00103508	19.8569	65.8586	52.8141	49.457	53.2252	49.2516	20.6779	40.8388	29.6415	45.5854	27.1581	28.2807	27.3914	16.7105	42.5815	59.906	26.2112	39.0945	40.9503	38.0025	25.0131	37.5071	64.3569	44.5762	58.4378	49.8053	38.4636	44.0658	33.1467	22.8128	21.6967	20.0807	27.7397	27.5866	31.6843	20.9928	28.9623	31.8022	34.9639	31.0371	29.7538
7q22.3	NM_006348	10466	COG5	component of oligomeric golgi complex 5	1.11721	0.159897	4.75388e-05	0.00105176	2.51323	6.68213	7.22652	6.93874	7.59631	9.09745	2.74379	6.49421	8.09998	8.01446	5.46515	5.07999	6.92964	1.72667	9.36312	10.6326	6.19398	6.56467	7.07376	5.80424	4.81847	7.00099	9.22774	6.22388	5.55476	4.93849	8.99036	8.36364	9.14414	4.60869	4.14986	3.68278	4.71407	5.89986	5.8962	4.33789	3.63525	6.12518	7.87232	6.8157	7.0752
3p21.1-p14.3	NM_018398	55799	CACNA2D3	calcium channel, voltage-dependent, alpha 2/delta subunit 3	0.810017	-0.303976	4.77811e-05	0.00105478	1.81309	1.59708	0.522364	0.198796	1.61119	2.54641	2.62161	2.56313	0.67881	1.13326	0.692928	0.688994	1.82708	0.582516	1.21912	1.19569	1.96209	0.739754	0.784039	0.833694	3.19839	3.12742	0.334901	0.818773	0.744599	0.649675	1.47177	0.8782	2.31075	6.72404	7.44352	8.36568	0.471439	0.66221	0.852903	1.73053	1.4153	1.83583	3.29878	2.87671	3.17019
12q24.23	NM_001278557	55884	WSB2	WD repeat and SOCS box containing 2	0.864428	-0.210182	4.79258e-05	0.00105564	14.5826	13.6905	17.668	11.6041	15.3453	21.2331	24.5891	13.8333	11.2443	18.1386	7.71458	23.0377	33.6658	14.9844	11.1714	14.575	35.8308	17.8016	18.5193	16.2539	19.315	28.5961	14.8066	24.3445	24.9832	22.8209	15.9427	19.9351	15.1516	47.3825	51.3387	49.8305	24.1785	15.6251	19.0443	25.3489	32.3733	29.2224	16.0002	13.6419	11.7454
6q25.1	NM_007044	11104	KATNA1	katanin p60 (ATPase containing) subunit A 1	1.15808	0.21174	4.86204e-05	0.00106623	2.1863	4.5979	4.19072	5.03536	6.78795	6.34377	3.56901	6.63516	6.43571	4.99364	4.0704	4.94597	5.90128	1.97218	6.3647	6.55594	4.7466	6.75654	7.55583	5.69325	4.52821	7.34022	6.59623	6.22213	4.20219	3.29164	5.94176	5.57824	6.91203	4.77533	4.09607	4.52426	3.74496	4.44033	4.39315	3.90802	2.9607	4.17435	6.49303	4.06949	5.49406
19q13.1	NM_002503	4793	NFKBIB	nuclear factor of kappa light polypeptide gene enhancer in B-cells inhibitor, beta	1.68569	0.753336	4.85267e-05	0.00106623	3.58451	4.92271	4.87459	4.76684	3.41403	2.67835	3.76606	4.74775	2.26557	2.07713	4.48485	1.81977	2.01686	4.85256	2.9953	2.93025	1.7659	6.36396	4.69477	5.94983	4.64058	1.83597	6.42051	2.70451	2.55915	2.03976	1.35838	2.3537	1.7458	1.204	1.34192	2.09522	3.06742	2.37568	3.49274	1.99961	2.85261	1.09631	2.15882	2.88633	2.56728
8p12	NM_001009552	5516	PPP2CB	protein phosphatase 2, catalytic subunit, beta isozyme	0.870738	-0.199689	4.87726e-05	0.00106722	15.1298	21.8397	30.7888	28.6869	24.375	28.7987	19.0596	25.1651	13.4219	26.4212	13.1899	23.1583	23.7449	12.0603	26.4985	34.68	27.5605	28.9992	28.3077	25.2785	19.9605	28.2797	38.8353	31.7932	35.6623	36.447	24.0982	32.7695	27.6845	41.6525	39.2571	38.6605	26.9428	25.6157	32.3956	30.7849	37.9031	36.0546	28.0228	22.7992	25.8439
9p21.3	NM_004432	1993	ELAVL2	ELAV like neuron-specific RNA binding protein 2	0.679465	-0.557529	4.92014e-05	0.00107425	3.56615	3.12449	4.63085	4.41508	4.64522	7.81787	5.07883	7.90887	1.43482	10.9675	1.02295	4.48977	5.72988	1.96784	3.54085	3.71639	4.13144	4.13727	6.25736	5.22022	6.11065	16.428	0.649291	5.49186	4.93969	4.04003	8.52044	8.79805	6.71663	28.7315	24.9932	21.0561	5.7044	6.71497	5.81957	10.237	12.0012	13.962	6.77634	6.40027	8.24275
14q32.2	NM_173701	7453	WARS	tryptophanyl-tRNA synthetase	1.16337	0.218309	4.94248e-05	0.00107677	10.149	21.9851	22.9782	15.3763	17.3313	19.9875	17.6328	14.7653	32.8125	15.6426	17.9866	10.1287	10.5086	7.0848	20.5244	22.8149	9.10585	22.7458	15.8182	12.1748	13.3805	14.1469	33.1023	12.1319	12.5278	10.4744	17.0683	25.3259	14.6417	12.3386	12.9121	11.1826	12.9424	10.3922	14.514	8.03849	11.5032	8.46689	14.71	16.5598	13.4374
13q14.3	NM_024570	79621	RNASEH2B	ribonuclease H2, subunit B	1.31297	0.392837	4.95462e-05	0.00107706	3.35679	4.74522	10.7603	12.1517	9.33971	6.90854	2.54974	6.12997	3.89726	10.3169	6.45557	10.8374	13.1733	3.35491	9.60021	11.2118	10.1411	7.31446	7.82669	5.50544	3.84563	6.88978	6.70197	10.131	11.1879	11.7471	8.94638	10.5944	7.19002	2.62074	2.51629	2.42579	5.93485	7.06599	7.59818	1.93776	4.06428	3.01312	6.4061	5.65872	6.30331
19q13.33	NR_110730	101928378	PTOV1-AS2	n/a	0.819203	-0.287706	5.04928e-05	0.00109525	1.26549	2.11233	1.86486	1.08758	0.815656	1.20136	1.39564	1.29629	1.53184	3.00288	0.620732	2.25209	2.07968	2.49834	3.86327	1.75693	2.44989	0.817968	1.58077	2.53488	1.29626	0.955581	1.17779	1.80241	1.80846	2.23061	1.04536	2.1844	2.15565	2.07747	3.55713	3.18796	3.01196	2.95575	2.94971	3.84586	1.12118	2.05422	2.51353	1.49707	2.28205
11p15.2	NM_001144061	1315	COPB1	coatomer protein complex, subunit beta 1	1.13589	0.183829	5.07605e-05	0.00109867	6.0169	16.1802	19.234	27.5135	26.5398	30.6702	8.97097	22.6917	13.8601	20.7719	19.7421	16.5073	17.1623	5.04615	39.661	36.1553	14.8923	22.8935	26.3913	13.7917	19.3509	27.1967	49.4528	17.2812	22.2963	12.2202	21.1766	23.9785	27.0084	11.1503	11.6577	10.1871	15.0333	15.164	14.6113	12.1361	8.38894	17.6294	26.928	25.5468	24.5247
Xp22.2	NM_001830	1183	CLCN4	chloride channel, voltage-sensitive 4	0.811857	-0.300702	5.12819e-05	0.0011026	2.69428	4.20692	1.85131	1.65697	2.61454	4.00616	4.46162	3.13948	1.98384	8.45861	1.77047	8.64269	15.6225	2.54677	2.62994	2.7733	12.8717	2.34295	2.61643	2.4754	6.01588	5.93793	2.83958	5.7011	6.72009	5.58649	4.36818	4.93422	4.1369	12.0585	12.7678	12.543	4.26353	5.15097	4.87712	4.82811	4.33601	5.34719	4.94335	3.92131	3.86909
9p13.3	NM_020944	57704	GBA2	glucosidase, beta (bile acid) 2	0.864622	-0.209858	5.13208e-05	0.0011026	14.2055	12.6245	10.9198	8.4683	8.74577	8.85831	13.351	6.28902	10.1013	10.9005	8.71744	8.44228	11.008	13.5041	11.6928	9.59078	10.1264	13.2974	12.5943	9.61467	10.4824	5.98087	8.31484	7.91187	7.98605	7.64672	10.0835	10.7255	9.30536	14.2246	14.781	15.7878	16.2063	13.8921	14.5848	12.1872	10.8655	9.4003	10.943	11.7206	13.0141
1q21.2	NM_001005464_dup1	333932	HIST2H3A	histone cluster 2, H3a	1.11164	0.152689	5.13839e-05	0.0011026	292.313	268.527	218.291	347.977	220.151	160.431	138.604	469.439	335.175	175.543	405.074	117.738	109.375	494.958	259.233	234.052	116.013	343.673	306.534	342.487	204.882	191.898	57.9215	140.305	186.304	152.606	178.97	285.203	218.164	58.3635	40.4352	66.2901	109.639	89.4447	94.9615	104.2	167.866	64.4851	118.886	187.363	195.367
19p13.13	NM_006397	10535	RNASEH2A	ribonuclease H2, subunit A	1.19506	0.25708	5.12032e-05	0.0011026	21.1855	19.3446	23.5421	25.685	19.1559	13.8172	16.7194	31.0669	24.8368	22.9647	25.3081	11.9839	13.3419	36.5501	24.6826	23.8744	12.9503	35.7081	35.8082	26.0427	20.895	20.0283	13.0136	19.6753	23.1945	16.3201	20.1972	32.6212	21.9391	10.6151	10.3595	9.51506	13.163	11.9218	12.2463	13.8571	18.2663	10.4397	13.1622	18.2862	20.9995
6q11.1	NM_001190706	100463487	MTRNR2L9	MT-RNR2-like 9 (pseudogene)	0.89226	-0.164464	5.15854e-05	0.00110455	2458.5	803.047	2496.03	2916.37	2242.73	2110.09	1844.97	2167.39	1679.81	1794.1	2090.98	3108.75	3006.48	3268.41	1721.97	1186.06	2230.36	1131.78	1211.85	1184.88	3686.82	3110.1	1819.37	2900.1	2761.2	3614.6	1265.02	3560.74	2063.31	1994.15	2069.42	2256.25	2291.47	2171.58	2267.68	1732.85	3688.49	2568.1	1657.72	1734.49	1785.49
13q32.1	NM_021033	5911	RAP2A	RAP2A, member of RAS oncogene family	0.761095	-0.393852	5.1715e-05	0.00110495	5.77207	8.41616	11.1797	10.5674	9.75354	13.276	6.04447	6.4167	6.60395	24.3052	5.98056	20.52	23.5324	3.52096	12.1657	15.9636	22.7407	9.00872	10.7324	8.89614	6.20593	13.9998	11.2838	17.8078	19.7756	19.6857	18.6884	18.2617	18.1408	29.6289	24.8386	22.431	11.5124	14.7662	15.1727	11.7026	14.4147	19.4327	15.5091	12.8894	12.6523
3q27.3	NM_052969	116832	RPL39L	ribosomal protein L39-like	1.431	0.517023	5.20724e-05	0.00111021	24.5159	14.5775	18.0046	21.0608	14.4585	12.9073	6.25149	35.8747	17.6565	15.2969	11.7875	16.081	16.0988	25.1546	17.4908	15.9362	14.9405	24.7639	23.1526	17.6026	17.0893	18.8753	8.33588	14.6564	15.9644	15.3284	11.8173	14.9668	9.81426	9.15321	8.28643	7.78964	5.22583	3.85009	4.16585	8.42015	11.9767	8.18642	10.5206	11.7246	13.0627
15q21.2	NM_001142495	4644	MYO5A	myosin VA (heavy chain 12, myoxin)	0.699468	-0.51567	5.23104e-05	0.00111291	2.31395	2.50947	1.34662	0.935394	3.02739	4.2878	4.54638	3.14466	1.93007	9.83925	1.06267	6.65364	15.2263	2.02231	1.98399	2.03901	16.492	2.1307	2.10305	2.05542	5.81699	4.64992	2.20281	5.14976	7.06053	5.0233	3.58481	5.28289	4.19226	14.8912	17.9516	18.1469	3.55183	3.3924	2.82513	7.71523	6.35916	6.43476	4.50596	4.21024	4.80713
19p13.11	NM_024069	79036	KXD1	KxDL motif containing 1	1.09818	0.135118	5.2601e-05	0.00111671	34.2152	39.1803	41.515	41.3958	30.8475	25.7969	33.7968	49.6204	44.2618	21.3728	37.251	18.8536	21.3336	36.5346	40.016	35.8914	16.8423	41.9356	36.7315	33.4562	33.2515	23.6741	28.8211	32.0739	29.8201	28.5416	22.5968	30.4293	25.7236	19.7399	19.0477	19.3725	26.6907	20.7742	24.0698	17.6639	24.8292	21.1604	22.6808	23.8543	27.8263
1q21.3	NM_212551	388695	LYSMD1	LysM, putative peptidoglycan-binding, domain containing 1	0.886749	-0.173403	5.32683e-05	0.00112544	5.21434	4.82182	4.99161	2.27011	4.64339	5.4034	4.79749	4.59138	3.59157	6.72565	3.13416	5.56851	8.83753	5.79073	5.34079	4.97079	4.23019	5.53785	5.22742	4.37392	5.6148	5.58188	5.26595	5.43276	6.40787	7.2404	5.52964	6.34647	5.23324	9.73368	9.67792	8.49489	6.68523	5.15804	7.21023	6.90297	7.66109	5.98277	5.97225	5.03152	4.46438
1p31.1	NM_173808	257194	NEGR1	neuronal growth regulator 1	0.660742	-0.597841	5.33224e-05	0.00112544	1.34749	2.5098	0.258544	0.171701	1.47313	2.63287	3.97666	0.688262	0.433776	4.79425	0.573411	2.91906	4.44641	0.606267	0.920703	1.14416	4.42175	0.625437	0.529242	0.532762	2.2439	3.96945	0.120129	2.84007	2.84091	2.774	1.59072	2.39735	1.59866	12.6212	12.7846	10.8627	0.651631	0.787937	0.58582	5.97335	7.54226	8.22234	2.72825	2.60852	2.56278
11q24.3	NM_021978	6768	ST14	suppression of tumorigenicity 14 (colon carcinoma)	1.97627	0.982782	5.33508e-05	0.00112544	1.40514	1.10821	13.0359	9.00461	8.40089	5.86069	3.5632	0	14.346	0.173042	12.1503	0	0.069328	0.141736	7.30063	6.81234	0	5.7061	4.93881	6.77639	0.354432	0.071454	19.1233	0.916528	2.08384	1.31327	2.89666	1.40173	1.06307	0.041364	0	0.01566	1.64928	1.61105	1.85468	1.73422	0.990114	0.915386	2.17965	2.69956	3.15505
17q11.2	NM_000386	642	BLMH	bleomycin hydrolase	1.11213	0.153331	5.36692e-05	0.00112786	5.59815	10.588	10.4537	11.4221	11.3049	11.8459	6.69337	10.8403	10.5742	12.5073	9.87951	6.016	11.8809	3.9675	16.9704	14.9378	9.47422	18.612	16.6455	15.415	6.55157	10.5273	13.9079	9.59179	9.95431	7.26215	11.5535	12.575	14.3737	6.48715	6.62462	6.59926	12.6383	13.7524	12.4248	5.14199	4.05353	6.1436	11.6147	10.1629	10.9701
19p13.11	NM_024104	79086	SMIM7	small integral membrane protein 7	1.10291	0.141309	5.36916e-05	0.00112786	8.09671	17.1112	24.0407	26.9467	19.4484	18.6	12.2748	15.0174	22.928	11.8931	17.8821	9.47906	10.4859	7.1814	24.6662	26.3008	10.8531	23.8737	16.1379	12.0734	11.1904	20.3162	23.4935	16.644	17.3586	12.6134	16.8701	17.1336	17.4671	11.2892	10.5012	10.5211	13.4958	13.7149	14.8199	10.5628	11.4463	9.65737	17.5545	15.2501	17.542
15q11.2	NR_002824	400322	HERC2P2	hect domain and RLD 2 pseudogene 2	0.706034	-0.50219	5.40381e-05	0.00113276	1.85444	5.46404	2.1134	1.45212	3.80347	5.96801	2.14439	2.80002	5.66765	11.2764	3.16437	3.6669	8.12854	2.35297	5.97808	5.73241	8.78842	4.02021	5.17738	4.57346	3.53383	3.12209	7.31634	2.80897	4.01225	3.38891	10.5245	7.5028	7.39806	12.0434	13.668	13.5493	9.71978	10.1202	9.05362	10.13	4.19299	7.4397	4.65408	3.3486	3.936
3q13.32	NM_003778	8702	B4GALT4	UDP-Gal:betaGlcNAc beta 1,4- galactosyltransferase, polypeptide 4	1.26574	0.339984	5.48363e-05	0.0011406	1.78464	4.9747	11.695	9.52465	9.11509	9.11522	3.47124	3.81898	8.15422	4.06907	7.03888	2.77671	3.70483	1.41792	9.61845	10.6071	4.22229	7.25705	7.93421	5.07979	4.66462	3.53969	14.3613	3.05102	3.41608	2.18819	6.02662	3.16468	4.43258	3.85847	3.68824	3.69819	6.58331	7.79758	8.32272	3.41891	2.62697	4.4137	7.20233	5.72782	5.72551
2p23.2	NM_024692	79745	CLIP4	CAP-GLY domain containing linker protein family, member 4	0.677119	-0.562518	5.49839e-05	0.0011406	0.194407	1.95184	2.68609	1.61342	1.56189	2.57349	1.18832	0.496616	1.30369	3.26663	0.698288	0.220558	1.81068	0.484068	1.93265	2.83761	1.68414	1.0727	0.764901	0.480282	0.705255	0.42875	3.05966	3.22583	2.19659	3.06977	2.016	1.31113	1.29366	2.73235	2.6815	2.48082	4.9397	4.9745	4.98769	1.88389	1.52875	2.36281	2.51387	1.55329	2.75458
14q32.2	NM_016337	51466	EVL	Enah/Vasp-like	0.904516	-0.144782	5.49252e-05	0.0011406	61.2948	40.3747	40.7663	38.5485	34.8471	33.1546	65.1831	34.2924	33.9678	46.7922	30.8179	44.2544	51.9091	41.6224	39.4161	39.3307	52.1378	47.966	32.5076	36.5187	46.6506	26.0301	21.4259	39.9132	40.1199	43.7191	37.0575	46.743	30.8156	66.4926	64.641	66.395	38.3178	34.1208	39.7396	55.923	56.7047	49.1825	46.2912	41.1086	46.6183
1q23.3	NM_016946	50848	F11R	F11 receptor	1.41059	0.496301	5.48125e-05	0.0011406	1.97948	1.86145	33.6967	18.8162	12.4233	11.8546	3.0252	3.50992	13.2127	3.72948	7.51681	2.16948	4.91862	1.55491	16.428	24.216	3.3839	23.9516	22.8751	19.8612	2.26512	1.78914	62.2222	5.02531	9.76263	5.527	7.98505	3.70934	6.37336	0.889564	0.972071	0.990818	11.812	11.558	13.1936	4.2334	2.61036	3.00893	6.79805	6.89355	6.22814
1q22	NM_020387	57111	RAB25	RAB25, member RAS oncogene family	1.8174	0.861877	5.4827e-05	0.0011406	2.42331	1.71932	30.5459	27.3916	16.5238	13.5102	4.51723	0.219749	21.6692	0.739189	18.8452	0.236981	0.293832	0.719248	17.4149	18.0362	0.355981	19.8931	16.9253	18.4145	0.958952	0.972157	58.2367	4.30486	4.18898	3.09456	4.07687	2.34558	2.46745	0.234843	0.238079	0.159497	3.88623	4.41355	2.8759	2.06572	1.40887	1.0765	4.88746	6.40977	7.39292
11q23.1	NM_022761	64776	C11orf1	chromosome 11 open reading frame 1	1.17377	0.231153	5.53674e-05	0.00114617	11.2355	9.23615	20.3528	19.0851	12.575	9.22713	7.25001	14.5543	8.73782	10.8132	7.47387	9.49291	9.77337	9.21014	13.03	13.6088	7.55311	16.9052	10.3573	7.02287	10.771	15.7122	17.7458	12.3185	11.8347	10.7485	9.76794	13.0747	10.8746	5.65197	5.40671	4.66097	9.82974	9.48859	9.0693	6.2963	7.83933	6.40383	11.2541	8.85122	9.27715
13q13.3	NM_013338	29880	ALG5	ALG5, dolichyl-phosphate beta-glucosyltransferase	1.14838	0.199606	5.58124e-05	0.00115299	4.29922	10.4069	17.6584	20.9981	14.5302	10.9204	5.72552	11.2545	12.7146	13.8563	11.853	8.12461	11.6506	4.71073	25.6631	26.6064	6.95005	14.127	10.7771	9.23837	9.49671	21.449	22.9779	15.043	14.2211	10.144	11.9116	14.1419	13.8113	8.37213	7.91419	7.70585	8.24081	9.65807	11.3361	5.88423	4.89315	7.06628	15.6353	13.6486	12.7685
19q13.33	NM_017457	9266	CYTH2	cytohesin 2	0.812598	-0.299386	5.63014e-05	0.00115592	7.79811	3.90659	4.45203	3.97387	4.7135	4.90811	5.8555	7.18821	4.30722	7.8579	3.37913	6.28319	7.04577	7.36403	8.34503	7.2815	5.77911	5.81912	5.42415	6.2158	7.26452	2.47391	2.79571	6.53663	6.99552	7.04532	4.68946	8.27494	6.34607	12.6596	13.6556	14.8087	7.51554	7.65524	6.4029	10.4818	7.61217	7.39525	6.74028	6.35255	9.13546
5q31.2	NM_001271803	51308	REEP2	receptor accessory protein 2	0.753211	-0.408874	5.6073e-05	0.00115592	26.0814	13.98	3.71303	7.50966	5.08874	7.50221	30.633	22.098	4.48503	17.0911	5.1748	21.1334	20.2525	25.2624	8.83322	8.52887	20.0702	9.06372	8.96268	8.38519	28.8452	14.6437	3.55386	13.5872	11.9308	12.2641	5.9752	12.0703	8.37622	29.1748	28.117	31.707	14.9361	13.6035	13.4781	20.512	22.845	13.1648	13.8055	13.599	20.4385
17q11.2	NM_006461	10615	SPAG5	sperm associated antigen 5	1.19716	0.259617	5.62848e-05	0.00115592	2.55328	4.68122	8.94735	3.76356	6.06914	6.70444	2.08323	13.9775	7.19579	10.0623	4.48842	2.73612	7.10166	3.44104	9.31934	11.2328	6.01759	13.2547	17.3552	14.2726	4.76022	3.81277	4.75942	4.85495	6.67228	4.88602	11.434	12.4579	12.9436	2.99011	2.96523	2.93851	7.63697	7.63204	7.73574	5.46287	4.31281	3.95598	5.59772	6.08806	6.2323
13q14.11	NM_013238	29103	DNAJC15	DnaJ (Hsp40) homolog, subfamily C, member 15	1.46038	0.546347	5.65015e-05	0.00115764	4.20318	6.29103	13.4641	12.8776	10.3735	11.0305	3.93309	5.3959	5.56578	6.28654	4.51516	5.5236	6.55252	4.11588	9.49854	11.621	4.30577	8.55158	9.26392	6.5139	5.57136	10.7654	8.58253	6.34644	5.42284	4.36618	5.66458	7.29744	5.58863	5.39681	5.07741	4.36095	5.86029	6.0419	7.05501	3.12226	3.65979	3.38551	6.97358	7.08643	7.21068
19p13.3	NM_145173	148252	DIRAS1	DIRAS family, GTP-binding RAS-like 1	0.75098	-0.413153	5.67107e-05	0.00115945	5.49368	3.56569	2.43778	2.22121	3.2589	3.97072	7.26201	2.18116	2.65999	8.02599	1.62958	10.1071	15.8833	6.0204	2.16145	2.7815	15.664	2.53899	2.35837	1.99562	7.39001	3.29124	1.49985	6.88248	8.51953	8.75763	3.33027	5.54322	2.89794	13.5573	13.3909	15.2166	4.75536	4.78351	4.34485	7.049	5.97227	5.07256	4.66264	5.07296	5.09321
8p21.3	NM_001160037	23221	RHOBTB2	Rho-related BTB domain containing 2	0.746318	-0.422138	5.68223e-05	0.00115945	8.9942	5.28608	5.15428	3.69216	3.67063	5.60491	8.43675	1.71242	4.76626	6.14065	4.5876	4.60264	5.36118	5.95578	6.24547	4.25781	4.26253	2.86512	2.90101	3.81696	6.16411	1.02023	4.2674	5.86983	4.56405	4.32602	3.6478	5.71259	3.33511	7.45741	8.3665	9.80727	8.35623	7.24762	7.4185	6.17804	5.48732	5.05005	7.63657	6.85839	9.32183
6p22.2	NM_021018	8968	HIST1H3F	histone cluster 1, H3f	1.088	0.121685	5.77854e-05	0.0011739	492.209	360.607	252.359	418.408	259.474	189.533	216.442	684.281	363.788	223.797	490.8	172.467	199.149	611.747	375.952	313	176.353	398.029	396.756	386.524	284.285	290.693	57.1799	199.602	213.848	179.094	113.823	238.168	168.939	82.8791	63.171	82.7749	140.755	99.1264	107.684	164.387	281.108	120.848	169.793	253.925	282.852
9q33.3	NM_033446	89853	MVB12B	multivesicular body subunit 12B	0.853358	-0.228778	5.77205e-05	0.0011739	18.0198	11.558	9.1126	8.43387	8.58019	8.87572	21.8093	12.021	8.7246	13.7422	7.36506	13.9819	16.3326	13.9522	10.4016	9.128	14.7883	10.2056	8.51967	7.98786	20.5824	10.3118	4.41807	9.56332	10.3312	10.6764	9.27394	12.8479	9.266	24.2132	24.4671	28.1409	10.9017	9.70168	10.7855	18.2459	17.6887	15.2167	10.4381	10.2682	13.9944
1q21.3	NM_014624	6277	S100A6	S100 calcium binding protein A6	1.2053	0.269391	5.78832e-05	0.0011739	89.6245	40.0745	70.5738	65.146	109.699	82.2929	44.9688	35.1013	159.62	25.5497	190.441	21.9747	27.1969	52.8927	106.491	94.9688	22.7535	70.4445	66.7958	62.7326	75.8035	100.373	146.618	45.5069	44.4679	35.1304	60.0019	39.1436	49.3308	9.83988	10.3761	11.4731	41.5572	33.7905	41.4885	34.5244	39.7839	37.0125	48.878	55.0249	66.4258
Xq26.2-q26.3	NM_000194	3251	HPRT1	hypoxanthine phosphoribosyltransferase 1	0.726035	-0.461889	5.83277e-05	0.00118051	2.84638	5.18506	3.31297	4.86696	3.16647	3.15663	4.28442	2.11105	1.46755	3.04338	2.15094	3.96527	4.07328	2.26473	4.149	3.05249	5.15529	4.85791	7.063	6.4743	2.2118	4.74349	2.46911	8.58084	7.63441	6.53194	3.43589	6.59958	5.59363	10.3719	10.0314	10.8541	4.12949	3.89336	5.15531	3.36864	5.83915	4.24952	4.34625	5.97798	5.0361
1q32.3	NM_013349	29937	NENF	neudesin neurotrophic factor	1.21865	0.285284	5.84474e-05	0.00118054	24.0623	39.3383	24.9656	27.189	26.1405	22.9647	45.2667	19.3474	37.1153	12.6152	40.1508	15.9591	16.4349	26.0432	32.8992	23.764	11.0212	22.9901	17.3501	19.1027	26.155	23.5537	20.4156	20.6053	20.4802	15.1996	17.0079	20.8263	12.7342	8.9126	5.41381	7.119	17.9547	12.6723	15.1926	13.4837	12.9423	9.77416	17.1301	21.2765	19.2086
1p31.3	NM_001077701	57708	MIER1	mesoderm induction early response 1, transcriptional regulator	0.673984	-0.569213	5.85768e-05	0.00118077	0.46692	2.17765	3.13229	1.63078	1.89145	2.22121	0.526266	1.31154	1.92495	4.93329	1.0731	2.64858	2.03971	0.518035	2.03401	2.3497	2.03697	1.78162	2.27134	1.54634	0.239717	0.75913	4.66114	4.75132	3.26251	2.80098	5.11368	3.446	4.28164	2.10523	2.76693	1.5533	4.28827	3.26338	3.94627	2.25666	2.78971	2.12655	3.32378	2.77087	3.14632
5q14.3	NM_001884	1404	HAPLN1	hyaluronan and proteoglycan link protein 1	1.53726	0.620362	5.90257e-05	0.00118742	0.124005	140.377	27.6307	23.107	12.242	14.2486	5.8021	0	11.1008	1.05142	8.72812	0.016249	0.156617	0.187243	11.5891	16.9586	0.117488	12.3471	8.89246	5.93855	0.172513	0.844008	17.272	3.95293	6.33735	3.66368	5.60306	2.45483	4.47106	0.095784	0.136243	0.087069	2.96451	3.70481	3.04907	1.56439	1.08751	1.63622	5.11872	4.40995	3.46178
7q22.1	NM_016188	51412	ACTL6B	actin-like 6B	0.625959	-0.67586	6.11372e-05	0.00122742	12.8231	6.42184	1.46724	2.75182	4.58402	7.11144	20.311	9.2963	2.49734	12.9599	2.65896	16.1798	19.0815	15.0994	2.91399	3.4513	13.7801	2.60777	2.74773	3.18481	25.3571	5.48816	0.161384	11.8368	12.1436	13.624	7.20384	11.7086	3.9187	29.0438	27.3837	27.8699	5.39238	4.02094	5.01276	16.0946	19.9796	14.4503	9.52027	10.0856	12.673
12q13.12	NM_173602	57609	DIP2B	DIP2 disco-interacting protein 2 homolog B (Drosophila)	0.858904	-0.219431	6.15951e-05	0.00123256	4.38761	5.46481	5.11586	3.71248	5.00166	6.8944	5.52845	6.2925	5.37452	10.7254	3.22932	5.16037	11.4097	2.92108	3.17372	3.89402	10.3092	4.16874	7.47367	6.32274	6.14629	6.42202	9.67914	5.24535	7.23179	5.7431	8.91108	7.83102	8.40013	10.193	10.7955	10.2769	7.46363	7.31141	6.90984	8.36386	6.35567	8.0872	7.51764	6.53919	6.76328
11q24.1	NR_024430	399959	MIR100HG	mir-100-let-7a-2 cluster host gene (non-protein coding)	0.635056	-0.655045	6.16406e-05	0.00123256	6.53925	22.4006	4.88305	5.2173	16.8484	26.7812	9.78688	6.8637	7.52414	10.648	5.69432	13.0058	13.8193	1.93413	7.28274	8.39974	12.9599	5.7944	3.85182	2.59345	16.8835	39.4569	2.11572	11.1368	9.70973	9.32587	16.0315	16.5884	16.2877	43.6003	40.6922	35.4215	9.02736	9.62205	9.59123	26.3279	25.5128	42.9152	18.3572	14.9069	17.8598
Xq27.1	NM_012317	23641	LDOC1	leucine zipper, down-regulated in cancer 1	0.620831	-0.687728	6.19435e-05	0.00123614	10.9157	13.2735	12.5693	8.08109	12.8322	11.2907	13.511	0.46721	18.8028	9.8622	14.8847	2.85178	4.15473	5.73444	5.44954	5.16425	3.63235	1.71342	0.899107	0.719084	11.6225	6.34922	15.328	9.016	9.07923	7.13549	16.8018	9.68784	12.22	12.5939	12.5424	13.9	17.3138	11.2999	16.8999	9.99893	7.63896	9.8056	16.7034	15.3108	19.2238
9q22.31	NM_005392	5253	PHF2	PHD finger protein 2	0.844404	-0.243995	6.25291e-05	0.00124534	12.241	15.2883	9.91599	5.39705	9.4761	10.4877	15.6759	6.18074	13.9158	12.0984	7.21791	8.41935	12.2052	8.82192	10.7382	10.9038	12.6878	9.10581	6.13462	7.68444	8.97062	3.84696	8.13454	9.26599	11.4088	11.9457	9.76625	11.1392	7.12309	14.2883	14.9458	16.6308	12.3731	11.384	13.8056	14.6595	11.3994	11.4147	12.1905	12.2716	11.6102
16p13.3	NM_005326	3029	HAGH	hydroxyacylglutathione hydrolase	0.819874	-0.286527	6.29368e-05	0.00124666	14.9824	10.6475	9.36441	9.96741	7.48581	6.74058	17.6937	11.8006	10.9548	8.38949	8.89738	8.83893	8.45563	15.4761	8.77193	9.589	8.38638	10.3285	7.32625	8.3043	13.554	9.22101	7.63957	13.117	12.6764	11.5024	6.87917	9.38628	7.46417	13.8004	13.4088	12.1959	14.8867	10.4286	13.2228	13.8331	14.0238	9.4443	9.52123	10.7158	15.0339
1p35.2-p35.1	NM_004964	3065	HDAC1	histone deacetylase 1	1.08973	0.123969	6.29703e-05	0.00124666	4.60632	13.1656	19.5462	14.3719	17.498	17.3469	6.71956	17.3	22.8488	14.1407	17.7317	4.32707	9.60766	5.57256	25.3577	28.5002	7.98545	23.5163	30.5707	24.7743	6.67907	8.31196	16.7096	16.2382	19.9804	12.6905	24.5607	15.1813	20.453	4.48822	4.83	3.99813	27.8644	26.1887	22.5919	8.06903	6.14715	7.22716	16.4765	15.1839	15.4075
12q22	NM_005761	10154	PLXNC1	plexin C1	0.727142	-0.459691	6.2929e-05	0.00124666	2.22194	3.02248	1.27918	1.61995	2.56782	3.60444	3.74046	1.59777	1.23859	3.98946	1.11805	2.48781	3.9431	1.10325	2.53532	2.18218	4.15802	2.2349	1.46986	1.46649	4.37124	5.82019	0.509246	1.98602	2.07435	1.55557	2.97763	3.71637	3.5978	8.42177	7.90999	8.96386	3.54472	3.98503	3.51207	5.16283	4.01519	5.41218	3.48468	3.69788	4.12863
19q13.32	NM_005184	808	CALM3	calmodulin 3 (phosphorylase kinase, delta)	0.941772	-0.0865499	6.31452e-05	0.00124724	100.501	85.8515	132.447	81.7338	98.1167	101.11	93.906	92.6071	116.5	113.258	69.5354	96.5723	147.39	88.0573	110.463	103.689	125.058	89.1985	73.7587	68.253	113.961	64.9096	72.633	100.883	124.027	104.695	109.863	127.909	86.4744	184.655	178.434	174.862	121.713	100.072	108.629	110.909	99.849	97.727	106.642	102.887	109.29
3p21.2	NM_004947	1795	DOCK3	dedicator of cytokinesis 3	0.790775	-0.33866	6.32496e-05	0.00124724	1.67843	1.29552	0.984183	0.627037	1.28209	1.76879	3.24591	1.27651	0.664829	4.43844	0.388657	3.09379	6.24516	1.49262	1.4049	1.66733	7.86593	1.43222	1.17408	0.995278	3.33104	2.1655	1.57361	3.28885	3.48945	3.22329	1.40546	2.07227	1.58735	7.20149	8.14719	9.08204	1.34925	1.55646	1.14628	4.81296	2.86991	3.80289	1.97837	2.21487	2.3944
2q21.2-q21.3	NM_002410	4249	MGAT5	mannosyl (alpha-1,6-)-glycoprotein beta-1,6-N-acetyl-glucosaminyltransferase	0.827987	-0.27232	6.36875e-05	0.0012534	5.45506	7.99163	4.1738	3.33847	6.99651	10.2065	10.054	4.85364	4.92546	7.69328	3.18835	4.47062	8.8697	2.76689	8.71524	9.26495	8.58261	6.89736	8.05604	6.83815	7.1428	7.62483	5.68009	5.30548	6.52881	5.49426	7.39407	5.51372	6.96095	22.8613	23.2452	24.1661	8.22993	7.57575	7.72804	9.18579	6.25606	8.41449	11.4629	9.39049	8.73581
9q22.33	NM_006401	10541	ANP32B	acidic (leucine-rich) nuclear phosphoprotein 32 family, member B	1.11521	0.157313	6.40335e-05	0.00125773	13.0365	24.9973	19.1611	15.4941	24.5413	25.4077	17.0754	18.0044	21.8107	19.1874	26.9904	4.37549	11.2071	11.2605	34.1061	16.8669	11.165	36.8417	34.3466	36.1861	9.23223	8.40633	30.1322	17.2259	14.5268	11.0816	26.7157	20.4035	29.4001	4.0508	6.46838	7.05886	24.3898	21.2525	21.9707	11.1776	7.0824	9.38054	16.6992	30.938	29.5162
17q24.2	NM_014405	27092	CACNG4	calcium channel, voltage-dependent, gamma subunit 4	0.848684	-0.2367	6.48571e-05	0.00126643	24.5225	11.8981	10.2314	10.0172	6.4345	8.30713	23.842	11.8011	7.41596	12.5162	6.33051	13.8008	13.5643	15.6117	8.56124	7.8726	21.1073	11.4965	8.28204	10.4079	18.1754	7.0669	7.94327	12.2086	11.4136	13.3861	9.84294	11.5898	7.24116	22.4799	22.7002	26.5113	8.36182	6.6943	6.62975	15.1293	16.6197	13.2749	10.5438	12.9067	15.4569
3p22.3	NM_001207044	23122	CLASP2	cytoplasmic linker associated protein 2	0.666596	-0.585116	6.48384e-05	0.00126643	5.05632	6.00213	2.37328	2.30913	5.56238	9.65175	6.03169	6.86424	2.1689	17.3055	1.42606	13.9136	20.3683	3.81497	5.75382	5.95864	20.0835	5.27223	5.63974	4.55717	11.5611	20.101	1.69092	8.38956	8.62861	9.38498	9.11647	11.347	10.152	30.5826	29.8105	29.2189	10.0005	9.87538	9.57842	14.2631	14.3209	16.2799	9.46519	8.99946	10.3701
9q34.11	NM_203434	389792	IER5L	immediate early response 5-like	1.43472	0.520766	6.48334e-05	0.00126643	9.09085	12.7535	9.90889	12.4209	7.13614	5.70714	9.50047	18.6908	11.3142	5.15274	10.5718	3.68163	2.98756	7.4674	7.86811	7.18264	3.55944	10.6867	12.4958	16.2651	9.33642	6.73222	13.7995	4.76	4.91657	4.36736	6.79427	4.52758	4.52276	3.27789	3.20815	5.24518	4.33302	3.81038	4.1844	3.63467	3.92508	3.31207	6.00662	6.5822	8.23684
11p15.4	NM_145040	112464	PRKCDBP	protein kinase C, delta binding protein	1.7784	0.830581	6.52368e-05	0.00127135	10.2239	8.79886	22.2287	21.6964	22.595	13.7447	7.07736	0.694954	41.1932	0.780053	48.8065	0.583031	0.805705	3.33702	23.81	17.1399	0.900652	12.92	3.21189	4.26915	10.2379	8.33238	21.7456	6.47403	7.52316	4.78809	9.28803	5.40316	6.58193	0.445974	0.502279	0.28038	2.75915	3.17214	3.56166	2.64085	2.47627	2.33737	8.63571	10.5124	12.957
1q21.2	NM_001040874	723790	HIST2H2AA4	histone cluster 2, H2aa4	1.04815	0.0678429	6.58807e-05	0.0012814	485.933	306.624	291.059	465.695	269.522	215.289	237.665	713.949	386.152	241.882	471.052	175.571	182.949	637.681	353.119	283.302	183.933	453.549	472.237	500.794	264.273	221.161	119.319	244.244	242.95	215.843	310.029	389.419	313.151	92.3253	69.4303	98.5704	254.757	186.483	237.216	166.69	245.289	121.01	207.696	293.556	326.324
22q13.33	NM_001130921	11158	RABL2B	RAB, member of RAS oncogene family-like 2B	0.836369	-0.257789	6.60737e-05	0.00128265	2.08637	3.84058	1.85535	1.35829	1.56587	2.08879	3.03698	2.10035	3.17434	2.61184	1.78138	1.54722	2.19136	1.49793	3.10076	3.29477	2.06763	1.96164	1.67515	1.49682	0.677923	1.47362	2.44222	2.28179	2.52506	2.87785	3.05657	2.4584	3.20362	2.93676	3.60574	2.57704	1.98912	3.13339	1.81428	2.5993	1.90455	2.932	4.51928	3.09725	2.08053
12q13.3	NM_004083	1649	DDIT3	DNA-damage-inducible transcript 3	1.11486	0.156868	6.63854e-05	0.0012862	21.7408	27.9654	23.4634	24.6271	39.2782	31.4518	25.0342	83.8202	15.9204	29.9093	22.8544	21.053	23.293	51.4787	34.0629	43.4787	19.836	58.0972	56.0783	37.3563	32.6535	61.1541	43.2875	14.8988	18.3731	22.3991	25.2776	46.2849	41.1676	15.3817	17.665	13.0823	29.7924	20.8212	35.3215	19.1429	20.684	21.7294	21.189	23.4846	21.1182
11p13	NM_012175	26273	FBXO3	F-box protein 3	0.681274	-0.553693	6.67883e-05	0.0012915	0.667386	4.20181	2.47819	3.95349	5.79858	5.04236	2.9349	4.23663	3.31713	7.56293	1.9793	5.41136	6.52193	1.02316	5.31946	6.15924	5.26465	2.73973	2.72202	1.77613	3.09951	8.27307	5.72887	6.4237	5.05819	3.1226	8.80943	8.40626	8.13632	11.2982	9.04148	8.81883	5.41399	6.42253	5.52518	6.08525	4.77924	6.77887	8.37826	7.55085	7.18894
9q33.2	NM_004099	2040	STOM	stomatin	1.4428	0.528869	6.70444e-05	0.00129394	3.05575	4.62077	32.7475	31.3648	16.9231	16.8975	2.80311	3.46003	14.6788	3.86175	8.95052	3.62794	4.49307	1.32155	16.8803	25.2762	3.29476	25.1066	22.0859	17.9454	3.91529	7.32425	45.4205	7.46895	8.99345	7.36134	8.32465	4.23339	7.2531	3.15712	3.0081	3.23714	15.1861	15.0054	16.3122	3.72766	3.41781	4.40186	11.5402	7.80589	8.83943
1q21.3	NM_000748	1141	CHRNB2	cholinergic receptor, nicotinic, beta 2 (neuronal)	0.841246	-0.2494	6.73328e-05	0.00129578	4.19582	1.35044	1.08294	1.11733	0.950263	1.4183	4.38317	1.25378	1.07491	3.32797	0.665794	3.46145	4.22113	3.26904	1.38816	1.13407	4.38283	1.32842	1.14841	1.00956	4.82898	2.03784	0.185218	3.23994	4.04957	3.75351	1.70399	2.76711	1.31291	6.71811	7.02407	8.47552	2.47175	1.96454	2.06339	4.11738	3.82743	2.96647	1.59621	2.11254	2.28716
3q26.2	NM_003262	7095	SEC62	SEC62 homolog (S. cerevisiae)	0.743914	-0.426792	6.73992e-05	0.00129578	3.77535	11.9835	8.95213	4.69265	11.065	16.3779	4.92509	6.85904	9.17859	14.1719	5.65843	6.01928	9.55508	1.91941	12.7525	11.1241	9.81111	7.82822	6.6219	6.64481	6.05685	10.7021	12.4572	15.2672	13.0098	10.5129	21.4591	14.4842	17.7909	11.8308	13.6761	14.3335	15.3676	15.0488	16.5261	9.23564	8.74438	13.159	16.8226	15.4327	15.6445
1p11.2	NR_027337	337875	HIST2H2BA	histone cluster 2, H2ba (pseudogene)	1.80066	0.848526	6.77886e-05	0.00129826	16.1784	6.91797	14.2274	9.84999	12.7839	11.5816	6.66248	38.5226	21.202	15.9606	11.2808	5.64078	7.85001	24.8867	13.4277	10.5797	6.85339	21.0514	17.5122	18.386	13.6272	15.8937	6.44419	6.26358	7.5769	7.93215	14.3161	20.8274	13.3785	6.41455	5.73127	8.63646	4.1002	3.84153	3.28006	6.00112	7.65738	3.8568	2.06094	5.29755	4.61205
6p21.2	NM_017772	55633	TBC1D22B	TBC1 domain family, member 22B	0.928411	-0.107164	6.77505e-05	0.00129826	3.04595	2.86256	4.69869	2.66368	3.16972	3.94629	3.63982	3.49324	4.83709	4.1509	2.39559	3.59292	4.37785	2.61504	4.17487	4.02905	5.21407	5.02535	4.88282	3.45199	3.07155	2.72943	5.93864	3.87579	4.986	5.13889	4.86403	3.48251	3.28862	5.91183	5.65579	5.90949	6.61787	4.91974	6.36434	4.00532	3.53141	4.12544	4.06103	4.18011	4.09173
7q36.3	NM_022458	64327	LMBR1	limb development membrane protein 1	0.83095	-0.267166	6.82043e-05	0.00130372	3.68666	7.06717	7.73971	8.06747	7.6101	10.038	4.58055	4.72173	5.86352	9.53516	4.15913	6.53464	8.04388	2.73936	7.73233	10.3123	7.33716	7.69939	7.745	6.27522	5.93239	8.15643	11.1172	8.40971	9.53918	7.02552	11.6241	11.1924	8.96629	13.5766	12.8367	12.579	8.15909	8.89397	9.32179	7.69189	8.38926	9.65038	11.8011	10.7463	9.71716
Xq13.3	NM_020932	57692	MAGEE1	melanoma antigen family E, 1	0.85582	-0.224621	6.90271e-05	0.00131693	2.29422	2.43381	1.01115	0.87061	1.89018	1.8157	3.83598	1.7637	1.42257	3.46423	0.85344	2.13473	5.16435	1.23191	1.23035	1.25049	3.93289	1.62744	1.75672	1.99597	3.48929	1.99571	0.95576	2.00065	3.20783	3.0991	1.58398	2.11481	1.56472	6.13672	6.34571	7.02668	1.8914	1.656	1.85608	3.58289	2.70446	3.21398	1.99125	2.36037	2.44757
2q14.1	NM_152515	150468	CKAP2L	cytoskeleton associated protein 2-like	1.39237	0.477541	6.94906e-05	0.00132324	0.922387	2.28649	2.19635	2.58748	2.54207	2.75328	1.01864	7.10135	2.21304	4.84368	2.41924	1.86203	2.79716	1.31526	4.06047	3.68889	2.76844	5.55237	7.15623	5.81103	1.57301	2.19825	1.34743	2.44156	2.0851	1.65075	5.61619	5.72897	5.58414	1.01527	0.861728	0.837191	2.7061	3.00559	3.46374	1.82369	1.47807	1.58283	2.7021	2.76058	2.47726
12q13.2	NM_001798	1017	CDK2	cyclin-dependent kinase 2	1.13623	0.184259	7.00443e-05	0.00132463	8.82707	8.93348	23.4628	18.0211	14.9474	13.5303	5.64233	6.77875	12.1883	11.5456	8.57318	5.5594	8.13024	7.73387	16.943	21.711	5.84993	18.1637	18.7524	14.1807	6.83587	8.43262	18.7314	9.73649	12.1749	7.52387	17.3161	16.9022	11.8492	4.7031	4.86942	4.4044	14.943	9.97261	12.5274	8.83408	9.15512	6.99591	10.8826	11.6789	9.57734
10q23.31	NM_016195	9585	KIF20B	kinesin family member 20B	1.30313	0.381985	7.00946e-05	0.00132463	0.805763	1.76713	2.84021	1.96569	2.34261	3.36339	0.882838	2.54346	1.01917	3.86678	1.15117	1.95167	2.34411	0.758143	3.37043	3.4247	2.23126	3.31228	5.126	3.94954	1.40792	2.33491	1.83869	2.48794	1.9034	1.70564	4.63499	3.94384	4.24121	0.823901	1.23974	1.17416	2.13186	2.17985	2.12733	1.84966	1.02298	1.93796	2.06924	2.62561	2.83488
5q31.2	NM_032289	84249	PSD2	pleckstrin and Sec7 domain containing 2	0.695436	-0.524011	6.96967e-05	0.00132463	4.7976	2.61635	0.696802	0.472595	2.27933	2.59442	6.17736	1.69541	0.73194	4.05639	0.601556	4.05022	4.07911	2.11867	0.804615	1.20761	9.99009	1.08275	0.832988	0.912177	7.19231	3.5065	0.405802	2.85014	3.80247	3.68865	1.25154	3.87698	1.09953	12.3164	12.5739	12.7396	1.69824	1.49187	1.48409	6.92538	4.7753	5.21954	3.33649	3.39842	3.5439
5p13.1	NM_012382	23548	TTC33	tetratricopeptide repeat domain 33	0.749758	-0.415502	7.00341e-05	0.00132463	1.19208	2.43863	2.54382	2.97706	2.60225	3.14952	1.45552	3.48855	2.38381	6.81034	1.49408	4.94461	5.86488	1.07455	3.22045	3.55122	5.47507	2.24913	2.99209	2.05053	2.22893	4.19543	2.77852	4.63846	3.64229	3.99735	4.29669	4.38474	5.09544	4.75093	4.37505	3.89993	4.20982	4.78813	5.29311	2.85015	3.64172	4.60964	4.59807	4.37095	4.6612
3q13.33	NM_005694	10063	COX17	COX17 cytochrome c oxidase copper chaperone	0.900275	-0.151563	7.02753e-05	0.00132526	24.5174	24.9719	40.0778	40.9607	33.7987	29.4675	28.1336	44.4883	34.9654	30.866	26.1238	23.2607	28.3924	24.8213	40.3635	41.8911	24.4598	37.4698	37.3426	27.0747	34.1087	62.814	39.9065	38.3085	44.3399	31.4943	40.1762	27.6714	32.8244	38.9562	33.329	27.6706	54.0996	43.6536	54.2132	25.0492	33.0325	27.0252	40.8566	38.953	42.0605
19q13.33	NM_015710	29997	GLTSCR2	glioma tumor suppressor candidate region gene 2	1.11585	0.158143	7.05527e-05	0.00132526	147.746	136.104	113.719	113.07	112.528	78.2099	138.551	189.317	135.641	51.0501	123.712	38.942	20.7648	120.612	106.722	90.0517	56.0645	142.055	118.958	149.313	83.3405	35.2083	79.9005	59.4121	59.5431	51.5683	29.7676	66.2274	48.5902	39.1092	33.6079	37.4777	63.3104	46.5963	58.262	45.1586	69.4095	42.0447	70.0485	81.4784	92.2814
13q14.2	NM_021999	9445	ITM2B	integral membrane protein 2B	0.860483	-0.216781	7.06595e-05	0.00132526	55.4744	54.4488	104.089	92.8152	81.9606	81.1854	51.7601	31.408	47.0615	65.6673	36.9449	33.8077	35.3795	38.1545	81.1114	103.289	31.7395	77.9631	46.4817	36.0352	38.6727	58.586	99.3295	73.1799	72.3754	62.73	89.0163	80.7719	79.812	57.5524	52.6926	50.0246	78.3481	78.2959	86.6101	63.4928	98.2182	82.4747	97.9523	86.5985	79.2559
12q13.12	NM_016357	51474	LIMA1	LIM domain and actin binding 1	1.36234	0.446089	7.06034e-05	0.00132526	0.883493	4.23748	7.59032	3.3487	9.74216	9.27951	2.42311	1.9842	7.47203	2.4994	4.49152	1.38323	2.3697	0.523585	8.35042	7.36241	1.92496	6.10701	5.9182	3.89623	2.55522	4.04618	18.1906	3.87835	3.71959	3.30885	6.29612	4.37725	5.55307	1.7045	1.14847	1.83028	3.48314	3.15438	3.12364	2.67421	1.17301	3.30497	4.779	4.60367	4.52101
2q13	NM_032824	84910	TMEM87B	transmembrane protein 87B	1.32464	0.405597	7.10651e-05	0.00133037	0.9149	3.33151	5.00127	4.62345	4.18116	4.58082	1.45724	4.88779	3.59929	3.41118	2.60811	3.7351	5.23638	0.652246	3.78955	5.51067	4.38755	3.27058	5.87964	5.27855	1.80746	2.59723	9.37432	3.37448	3.90607	2.48536	3.8035	3.30446	3.64895	1.90143	1.77532	1.52812	3.55298	4.57973	4.99675	2.06418	1.78519	3.78609	4.01891	3.70047	3.57429
2p23.3	NM_001013663	391356	PTRHD1	peptidyl-tRNA hydrolase domain containing 1	1.17024	0.226799	7.18432e-05	0.00134242	30.6154	45.6042	35.5173	43.0137	31.333	23.1758	38.6698	61.6526	48.9551	17.802	42.2481	14.7886	15.5366	39.0593	32.2432	29.4334	17.538	37.9267	33.3004	27.7636	23.5287	29.295	16.2616	19.3063	17.8028	16.5983	20.822	22.5437	23.2001	17.2951	13.9356	14.3261	18.9995	15.6305	17.0732	15.7273	21.4652	13.0463	21.4145	25.8372	32.1909
3p22.2	NM_001008392	10217	CTDSPL	CTD (carboxy-terminal domain, RNA polymerase II, polypeptide A) small phosphatase-like	1.36815	0.452231	7.25409e-05	0.00134797	1.92937	7.76142	5.04924	5.67678	4.4955	4.46617	2.22988	0.660582	4.0479	2.23893	2.5321	2.31429	2.97448	0.893933	5.41893	5.89444	2.40805	4.64787	6.54756	2.16997	2.17656	1.80312	6.94225	2.4035	4.088	2.98939	3.13779	2.7172	3.047	0.838188	1.24068	1.138	1.06647	3.30543	4.31585	2.28615	1.05449	2.09241	4.53819	3.00425	3.03353
19p13.11	NM_024074	79041	TMEM38A	transmembrane protein 38A	0.763335	-0.389613	7.24077e-05	0.00134797	5.78496	6.44077	1.77953	2.1839	2.14574	2.49085	7.66946	3.57426	1.61911	2.29445	1.70026	2.19935	2.33905	3.33624	2.72734	2.61443	2.43589	2.44792	3.32257	2.04685	4.09494	3.08123	1.5099	2.46731	2.43007	2.51486	2.1226	1.98884	2.84637	4.94349	5.64754	5.33714	4.52727	3.3342	4.61145	3.32084	3.47708	2.60083	3.64826	3.83841	4.50408
17p13.2	NM_015253	23302	WSCD1	WSC domain containing 1	0.699581	-0.515438	7.25454e-05	0.00134797	12.878	7.89917	4.84559	5.94278	4.92668	7.02943	10.9437	12.4911	2.90821	11.1041	3.17279	5.97987	7.95216	14.4747	7.82416	8.85445	9.67342	10.0864	10.5377	11.4679	11.8235	6.10128	2.68871	6.66185	6.44464	7.7848	12.5376	16.7047	11.7676	14.1163	14.1419	16.7468	7.58517	6.92464	7.3805	10.5821	12.559	9.1625	13.4035	13.3009	14.6852
7q36.1	NM_001136044	83590	TMUB1	transmembrane and ubiquitin-like domain containing 1	1.264	0.337993	7.28973e-05	0.00135199	14.9985	18.1846	18.6529	15.6404	12.2706	8.33671	15.3216	22.7635	20.6934	8.73214	16.6344	7.11595	8.33448	14.1804	14.8269	13.9841	9.01168	13.1856	10.5207	14.1264	17.7605	12.422	16.47	6.42527	7.71689	9.63549	9.84105	8.77808	7.80492	5.72828	3.64059	5.73795	11.8753	8.61515	10.74	6.34033	7.52957	7.2681	7.6715	10.201	13.3431
17q25.1	NM_004035	51	ACOX1	acyl-CoA oxidase 1, palmitoyl	0.795342	-0.330354	7.30538e-05	0.00135238	3.47039	5.21712	3.72224	1.44215	3.66042	4.4757	5.39696	2.35595	3.48994	6.55955	2.53444	5.67755	7.06712	2.13009	4.53165	5.90415	6.29802	4.15462	2.37444	3.28467	3.83794	5.07989	4.09042	5.36393	7.79644	6.79505	3.9887	4.71046	4.54975	8.07856	7.94379	8.11788	4.81933	4.45914	4.07139	5.66455	4.82487	5.21495	5.56703	4.84644	5.93437
9q33.3	NM_005347	3309	HSPA5	heat shock 70kDa protein 5 (glucose-regulated protein, 78kDa)	1.07035	0.0980846	7.39727e-05	0.00136059	26.4323	106.433	47.4785	46.0828	68.5738	68.7142	51.6742	47.518	73.9567	53.8929	67.6286	10.7688	16.271	23.0877	75.2017	57.5468	32.5196	112.521	83.7756	77.0303	45.0548	48.4727	91.2705	42.2342	39.9731	23.9814	76.7734	76.2291	89.8091	21.2212	20.2775	25.7479	40.7286	35.767	41.7608	23.7355	18.9747	30.5185	54.1814	58.0275	57.6607
14q22.3	NM_002306	3958	LGALS3	lectin, galactoside-binding, soluble, 3	1.37602	0.4605	7.40427e-05	0.00136059	18.9518	35.5575	87.0677	120.796	76.7971	51.9329	40.3258	3.53287	44.2596	4.01684	59.4207	2.70977	4.09855	9.7547	51.9822	51.3709	3.64748	47.3891	35.2284	29.7214	9.01514	22.7468	37.628	18.2879	19.1884	16.3956	24.1435	20.7438	14.695	4.72294	3.98587	4.28771	9.728	9.02723	8.66992	11.2462	17.2999	11.3518	11.6392	14.0481	17.3624
17q24.2	NM_014906	22843	PPM1E	protein phosphatase, Mg2+/Mn2+ dependent, 1E	0.734766	-0.444642	7.39883e-05	0.00136059	1.55743	1.05885	0.88812	1.09451	1.55356	2.55544	2.45626	2.42393	0.353355	5.38924	0.367538	2.61718	5.36783	1.29738	1.68813	2.04473	4.5138	2.0815	2.45635	1.93802	1.8009	5.23336	2.5e-05	2.38091	2.83629	2.42366	2.11766	2.20196	2.8033	8.40901	9.42957	9.1706	3.84886	3.7843	3.28259	3.64413	4.52855	4.38124	2.15645	2.12075	1.97593
20p12.3	NM_021156	56255	TMX4	thioredoxin-related transmembrane protein 4	0.706264	-0.501721	7.3985e-05	0.00136059	3.14929	11.8158	4.47734	4.1102	7.16688	9.2227	5.87226	1.12665	5.08686	8.38385	4.14927	3.77942	7.07185	1.66896	7.69864	8.34846	5.43979	4.3454	1.667	1.47404	4.67461	8.79695	8.95199	7.75701	8.74414	5.60254	8.24918	10.1131	10.7905	13.1075	13.0921	13.3986	9.17537	10.5013	9.92439	6.18534	5.53242	6.49897	11.1245	9.52765	8.78694
19q13.32	NM_001645	341	APOC1	apolipoprotein C-I	1.37108	0.455318	7.47596e-05	0.00137123	17.6964	8.8597	135.311	132.113	38.2041	17.1365	6.89347	17.3703	27.3893	3.24281	22.7339	2.63755	4.49859	8.02357	42.4991	43.8494	3.64835	69.5622	23.9199	18.3449	12.3878	22.1574	24.3516	23.4685	13.5805	10.4363	10.4552	8.50701	10.5243	2.04126	2.79244	1.30716	17.2831	11.0986	13.7595	8.6436	7.17413	8.52527	10.6707	13.6214	15.5783
16p13.3	NM_003223	7023	TFAP4	transcription factor AP-4 (activating enhancer binding protein 4)	1.31246	0.392274	7.5087e-05	0.00137471	6.57928	6.59927	8.25983	7.31964	6.19722	5.75613	5.3757	9.39157	9.80919	4.54297	7.80504	4.33134	4.75511	7.25411	7.67885	5.64986	4.57962	9.53598	10.4419	10.6729	4.60486	1.98398	2.71582	3.91256	3.80727	3.30237	4.04698	4.53123	3.69581	3.65471	3.16615	3.46456	6.38368	5.22556	6.55705	3.7738	3.95496	4.14616	4.14891	4.69925	6.03852
2p16.2	NM_138448	98	ACYP2	acylphosphatase 2, muscle type	0.823195	-0.280694	7.55144e-05	0.00137781	2.83614	2.24404	2.74983	2.42997	3.43622	2.60353	2.81155	4.2162	1.35973	2.82939	1.52401	2.40995	2.40623	2.38205	3.22273	2.4054	2.29721	2.17578	2.58247	1.44651	2.29848	4.23219	2.08582	2.70834	3.05676	3.29271	3.13725	3.65664	2.44467	4.1701	3.15107	3.42667	5.01119	3.75824	4.46286	3.70784	4.44262	4.35838	2.07663	2.70647	2.02074
6q22.32	NM_138571	135114	HINT3	histidine triad nucleotide binding protein 3	0.778495	-0.36124	7.55324e-05	0.00137781	4.74288	8.00885	6.40119	6.05175	5.8366	8.1514	5.40892	7.23384	3.29307	16.3439	2.88609	17.4839	16.8477	3.8506	5.67953	8.72019	17.1979	6.24299	5.94287	6.03542	6.53462	10.0366	8.99513	13.1585	13.3345	13.6575	8.42564	12.3416	8.96047	16.8383	16.571	13.733	7.63635	9.39408	11.613	8.74627	12.4399	14.7471	10.2244	9.31608	9.38985
16p13.3	NM_023936	65993	MRPS34	mitochondrial ribosomal protein S34	1.1163	0.15872	7.66266e-05	0.00139522	42.4637	44.7661	45.5008	50.9266	37.3009	31.1209	43.8577	75.1451	53.2703	28.6044	52.3495	26.2701	25.231	55.586	42.8649	39.3778	25.5985	48.4247	48.871	48.5718	45.983	27.7044	33.432	31.7812	30.5098	34.1591	32.033	23.2336	22.1853	22.8685	20.1903	27.6786	30.7666	24.8834	29.5049	22.5907	28.2702	22.419	25.1336	31.2464	37.1754
10p15.3	NM_014974	22982	DIP2C	DIP2 disco-interacting protein 2 homolog C (Drosophila)	0.881226	-0.182416	7.68308e-05	0.00139639	4.90645	7.13629	4.5932	2.87686	5.36405	5.45493	7.3749	4.55907	5.34131	7.01209	2.72492	5.08915	8.75403	3.65048	4.45165	5.63512	10.4895	5.67355	5.55359	5.3157	5.16943	3.04378	5.07434	4.25505	6.10973	5.99899	5.55708	6.32679	4.72243	10.0806	10.3931	10.1255	6.31762	6.1366	6.48729	7.99855	6.33674	6.98614	6.43974	5.8807	6.18591
19q13.3	NM_002691	5424	POLD1	polymerase (DNA directed), delta 1, catalytic subunit	1.31348	0.393398	7.71762e-05	0.00140012	9.76749	9.10513	11.9906	13.0962	7.49769	6.4467	7.92987	12.6942	14.8799	9.94786	13.4937	4.29936	5.97391	13.7821	8.84335	10.5853	7.64299	14.5208	12.7097	8.85909	8.10898	2.16528	5.33354	7.25815	5.05218	6.3987	4.17569	9.24323	8.79354	2.1991	2.59489	2.47793	8.94415	6.56399	7.80014	5.88844	5.33888	3.8798	6.43916	8.9461	8.66545
7q11.23	NM_181471	5982	RFC2	replication factor C (activator 1) 2, 40kDa	1.27119	0.346177	7.78087e-05	0.00140903	4.28973	6.19773	12.6422	14.1494	10.7419	7.12253	5.23828	11.7718	10.076	8.1248	7.2998	6.20879	9.05446	6.30895	9.26068	11.0371	6.0237	11.5803	12.7176	8.75033	6.69261	11.227	8.52259	6.64209	11.003	8.04692	10.7264	11.3021	9.74031	6.23211	7.99932	5.92999	5.21754	5.24029	5.9239	6.52342	5.93395	4.39156	7.6475	7.90733	5.95813
6p21.2	NM_018322	55776	SAYSD1	SAYSVFN motif domain containing 1	0.913201	-0.130995	7.86005e-05	0.00142079	2.42748	3.8263	2.67944	2.28533	4.01321	4.18469	3.32897	2.03065	3.00001	3.9964	2.17529	3.08085	4.69833	1.84389	2.91966	3.669	3.75857	3.62789	3.03586	2.04803	2.84206	3.57176	3.22383	3.98219	3.50992	4.36538	2.94317	4.25304	2.86901	6.23067	6.47478	5.8395	4.00327	3.00353	3.4105	4.40991	3.10696	3.66447	3.30165	3.95804	3.61877
11q13.4	NM_006591	10714	POLD3	polymerase (DNA-directed), delta 3, accessory subunit	1.25156	0.323732	7.89828e-05	0.00142512	1.15252	4.19784	4.97652	3.77667	5.51243	5.04069	1.443	4.88513	4.61688	7.77668	2.56204	3.45827	5.76836	1.54641	6.25986	7.11837	3.75378	6.04214	5.73484	4.84185	3.52941	4.87096	5.96336	4.39065	4.70945	3.33398	6.9963	5.84263	6.29157	3.94575	3.68998	3.21498	3.74997	3.1716	3.58784	3.41669	1.75791	3.07408	4.95998	3.2599	3.77595
15q26.1	NM_207446	400451	FAM174B	family with sequence similarity 174, member B	1.41664	0.502469	7.92176e-05	0.00142677	2.92169	3.01282	3.54711	3.44396	2.21346	2.44946	2.85874	0.95266	2.03651	1.46824	1.75271	1.90107	2.13782	1.72978	4.36663	3.89164	1.74399	3.8969	2.64463	2.29979	2.52317	2.18143	2.35566	1.85288	2.31102	1.74779	2.00818	2.45376	2.19542	1.70158	1.92396	2.09123	1.70619	1.59597	1.65867	1.85348	1.8632	1.75783	2.01164	1.8714	2.41772
6p22.3	NM_015895	51053	GMNN	geminin, DNA replication inhibitor	1.39983	0.485254	7.9818e-05	0.00142985	2.19386	3.82294	5.95083	11.3178	5.14854	5.09855	2.9296	8.30809	7.29339	6.86395	4.43561	3.05557	4.81193	4.04872	7.84232	8.87253	3.38829	8.3583	11.1407	8.20682	3.08773	10.4005	2.61485	4.29567	5.72116	3.90399	8.70406	5.6239	5.76567	3.36021	3.68494	1.55537	4.31933	4.72911	3.50517	2.63245	3.46969	2.15398	4.64201	5.6982	4.392
6p21.31	NM_145899	3159	HMGA1	high mobility group AT-hook 1	1.20464	0.268599	7.96755e-05	0.00142985	43.758	20.0715	124.01	125.301	27.4479	24.7117	27.8632	135.503	50.5324	56.7156	32.1854	42.7696	48.9923	66.3612	64.854	61.5643	50.0815	166.184	155.267	149.125	44.5151	23.7109	120.432	42.1367	54.9485	43.0067	35.098	40.7856	32.8012	21.159	20.5591	22.4707	34.6742	26.8784	29.445	23.3036	28.8527	21.4166	21.3745	28.9355	28.9855
7p12.3	NM_001287429	7378	UPP1	uridine phosphorylase 1	1.73476	0.794739	7.97224e-05	0.00142985	3.80639	3.44076	7.64273	6.14902	3.97276	3.92896	3.63224	8.7887	3.4769	1.99916	4.22473	0.656509	0.791622	3.26614	5.65131	5.30191	0.964243	11.7364	15.6101	13.0454	1.47691	2.55053	32.5522	1.90664	1.33117	2.67281	2.6817	1.752	2.02714	2.46863	1.63262	2.68694	3.2677	1.65061	3.82664	2.72908	2.68538	0.659611	2.57895	3.42668	3.53281
8p21.3	NM_001722	661	POLR3D	polymerase (RNA) III (DNA directed) polypeptide D, 44kDa	1.07871	0.109305	8.0518e-05	0.0014398	11.363	14.0626	17.9106	9.6982	19.2384	17.4011	10.2404	19.5688	18.1331	15.1856	11.7888	6.7932	13.439	9.14752	19.7286	19.6947	14.5842	24.3145	21.4099	22.7058	15.6463	10.153	22.0351	14.4298	16.4541	17.1212	19.1101	19.8328	14.9139	9.99663	11.1177	9.42354	15.9706	14.8145	16.835	12.3766	8.50075	10.805	16.3055	15.5528	14.3056
6p22.2	NM_005320	3007	HIST1H1D	histone cluster 1, H1d	1.06673	0.0931939	8.11502e-05	0.00144334	502.679	240.778	273.652	381.049	143.359	130.664	271.118	415.359	293.238	270.352	371.393	151.967	191.112	635.596	361.216	308.556	166.477	471.231	457.965	412.854	283.909	375.457	109.908	255.994	217.474	291.04	87.1114	213.037	122.958	121.485	104.123	111.436	244.229	183.439	194.894	155.919	260.643	144.247	197.08	269.861	299.19
4q12	NM_001079524	10606	PAICS	phosphoribosylaminoimidazole carboxylase, phosphoribosylaminoimidazole succinocarboxamide synthetase	1.07039	0.0981368	8.10929e-05	0.00144334	13.5447	26.7914	39.2495	40.3803	34.3383	36.5898	18.3252	42.5851	34.2778	39.8532	25.4163	21.0429	25.0318	14.3471	40.1388	48.9098	29.0575	49.2266	55.0299	45.1629	25.1992	31.0462	30.7348	32.9515	30.2906	18.8748	40.6111	38.3849	35.1538	29.2469	24.0811	24.6199	14.8871	21.8643	21.4034	20.6617	19.6238	24.4787	28.583	30.9896	33.8473
1q42.2	NM_014801	80003	PCNXL2	pecanex-like 2 (Drosophila)	0.86492	-0.209361	8.11134e-05	0.00144334	2.91399	2.85966	1.58788	1.34082	1.94522	2.77604	3.89369	1.50903	1.63608	4.33315	1.38312	5.48308	7.38413	2.78324	2.09278	2.7277	7.04119	2.91586	2.2851	1.77736	3.54713	3.01514	2.57325	3.18186	3.82917	4.13358	2.63242	3.44412	2.35237	7.33038	7.31694	6.82513	4.01313	3.94561	4.15489	4.11655	3.57893	4.16045	3.09188	2.64086	2.86391
14q31.3	NM_004545	4707	NDUFB1	NADH dehydrogenase (ubiquinone) 1 beta subcomplex, 1, 7kDa	0.922861	-0.115814	8.19821e-05	0.00145537	84.7003	117.756	71.0528	85.0278	74.8901	63.8958	100.312	58.1609	54.9146	65.5959	69.6342	56.3903	79.1701	86.9232	78.6804	77.7964	46.1743	83.2523	61.2953	41.0465	77.6945	128.456	57.6157	98.5205	78.1104	72.8999	73.0666	86.4824	89.2604	72.3408	65.6415	57.7125	76.1105	63.0104	76.9512	67.3788	76.8256	63.8739	78.0302	99.604	93.1906
7q22.1	NR_036569	101752399	STAG3L5P-PVRIG2P-PILRB	STAG3L5P-PVRIG2P-PILRB readthrough	0.859739	-0.21803	8.21178e-05	0.00145537	1.04275	1.36113	1.13954	0.865491	1.2966	1.11821	1.90919	1.67558	1.2267	2.65314	0.736023	1.13309	1.7609	2.08334	2.54622	2.05594	1.75423	1.58386	1.95903	2.24835	1.87769	0.899437	2.57044	2.26667	1.88649	1.28834	1.94877	2.24493	1.84855	2.01427	2.71952	2.18085	2.87992	2.90977	2.67104	3.10178	1.51839	2.13117	2.00178	2.27623	1.99148
6p22.1	NM_003514	8336	HIST1H2AM	histone cluster 1, H2am	1.06146	0.0860518	8.24549e-05	0.00145875	355.781	260.479	307.109	387.147	245.907	193.523	140.076	551.8	326.651	242.676	370.775	148.983	149.311	494.986	335.092	297.483	135.825	388.568	399.931	321.057	197.577	210.745	75.3784	213.048	208.169	169.824	273.544	362.885	285.234	76.0125	63.2845	72.6494	147.156	116.299	130.687	145.19	205.617	106.355	155.85	216.066	249.068
11q13.4	NM_001130035	58473	PLEKHB1	pleckstrin homology domain containing, family B (evectins) member 1	0.638228	-0.647857	8.32009e-05	0.00146464	3.66038	5.80218	2.24231	1.97589	1.25391	1.52642	3.89798	0.660224	1.13828	3.11114	0.923656	3.11934	4.10374	2.95275	1.74877	2.26539	2.64378	2.60891	1.52433	0.65659	2.87511	1.14895	0.06033	2.70301	2.6706	3.1875	2.99708	5.22083	4.08044	2.17155	1.85652	2.67597	7.7786	7.87956	7.64466	3.29034	3.04689	3.12759	3.14679	4.27712	3.98067
16q24.3	NM_000977	6137	RPL13	ribosomal protein L13	1.0488	0.0687454	8.31833e-05	0.00146464	365.267	447.656	287.547	316.783	322.858	229.013	351.053	645.558	435.272	149.737	409.514	137.381	144.129	313.76	306.292	255.463	155.644	350.072	365.152	401.178	284.971	219.914	182.247	231.284	211.689	208.257	173.273	151.291	149.247	113.256	97.7922	108.856	180.903	150.163	175.156	131.954	187.966	151.533	203.593	246.425	292.095
4q31.21	NM_015130	23158	TBC1D9	TBC1 domain family, member 9 (with GRAM domain)	0.822456	-0.281989	8.32284e-05	0.00146464	5.33847	9.22746	9.20417	6.99571	10.7262	12.8111	9.5638	4.59829	8.39952	10.7422	6.10041	6.50726	8.84057	3.46984	11.6291	13.5115	9.69517	9.26789	7.27896	7.16321	6.18915	5.95883	10.7279	7.70436	8.61904	6.977	9.7601	7.5035	10.7726	15.4762	16.0141	16.4338	13.3639	13.889	13.6883	8.99591	7.77793	8.65899	12.5232	10.0361	10.9733
19q13.32	NM_018215	55228	PNMAL1	paraneoplastic Ma antigen family-like 1	0.813353	-0.298047	8.49758e-05	0.00149276	15.0639	16.6089	15.5218	9.80038	11.4247	11.6632	16.8457	12.0266	6.37308	26.4133	6.42896	19.7549	31.0989	12.3256	18.9264	26.5521	24.9289	20.4133	11.1564	10.6005	18.0691	18.1109	13.8265	13.8632	18.6941	17.4765	12.2469	19.5441	15.9641	31.4531	32.1019	28.2165	23.5727	23.6605	24.4063	20.656	23.7089	23.0691	24.9766	18.8601	19.3993
6q22.1	NM_015952	51389	RWDD1	RWD domain containing 1	1.13457	0.182143	8.52599e-05	0.00149512	3.4723	12.7443	13.318	12.9396	17.1855	17.0774	4.23923	13.0478	8.84378	13.2077	8.53286	6.44704	9.12703	2.81609	15.7994	13.8662	9.64383	10.8999	15.838	11.0031	6.02145	13.072	14.5338	10.141	11.1062	8.43192	16.1728	6.64183	9.70017	6.10119	4.2709	4.18043	12.3355	12.0062	17.0089	3.98431	4.84488	7.58993	9.63116	7.82482	8.75334
16q22.1	NM_007242	11269	DDX19B	DEAD (Asp-Glu-Ala-Asp) box polypeptide 19B	1.19411	0.25593	8.58271e-05	0.00150168	7.88009	8.90063	12.1225	6.85626	8.91478	7.79198	8.54844	10.1602	12.4734	11.4579	5.12496	7.21775	10.6542	7.04592	11.7206	12.9189	7.04253	14.38	10.7534	6.45509	10.8451	8.95989	12.1157	11.0184	11.5987	8.68057	5.19772	14.3829	11.9184	7.77637	7.72795	6.94032	6.54646	4.81465	6.53517	7.05188	8.16172	5.53421	10.5711	7.94725	8.99061
8p21.3	NM_021630	64236	PDLIM2	PDZ and LIM domain 2 (mystique)	1.77023	0.823934	8.59349e-05	0.00150168	7.05727	5.33666	13.3884	11.6084	7.45508	4.54388	6.25243	2.10737	9.22025	1.20321	7.02906	0.949515	1.00104	2.97584	9.21978	6.94885	1.11871	7.24169	5.68201	5.67252	3.88822	3.60166	15.1706	1.87836	3.42826	2.50062	2.21902	2.67962	2.3405	1.069	0.532084	0.931017	0.957227	1.74496	1.66303	2.31306	2.34311	1.77947	5.26856	3.97462	5.21156
11q21	NM_032102	10929	SRSF8	serine/arginine-rich splicing factor 8	0.815096	-0.294958	8.62468e-05	0.00150449	3.00707	4.6777	6.03774	4.93821	3.83163	4.83778	3.37401	2.50075	2.09016	4.93094	2.70818	3.92398	4.89148	2.06658	5.26382	5.59033	4.06874	3.54907	2.23935	2.41361	2.64451	4.08077	6.9181	8.3379	8.8154	6.55157	5.13776	6.54394	4.97088	5.73118	5.80853	6.13373	6.43438	5.44428	6.41994	4.24405	4.55512	4.46821	5.38232	4.94561	5.27621
2p23.3	NM_002254	3797	KIF3C	kinesin family member 3C	0.767996	-0.380829	8.68277e-05	0.00151198	12.4491	8.22959	6.8334	4.65781	7.29451	10.6596	17.0673	6.3958	5.99373	19.7955	3.33883	21.7173	30.3198	9.43669	6.93908	7.67332	35.999	8.07054	7.4146	7.77811	16.3102	8.46775	4.2411	14.9814	18.6791	21.2819	6.21669	11.8336	7.12548	42.7188	44.4317	47.6983	13.0843	10.1031	10.9228	18.0806	14.6797	16.6526	12.0204	10.4956	11.9097
3q21.1	NM_001017928	131076	CCDC58	coiled-coil domain containing 58	1.1894	0.250237	8.73246e-05	0.00151431	2.13453	6.73219	21.7482	21.7789	16.8676	14.9188	3.84275	15.02	8.36474	12.4952	6.41871	6.39163	7.68763	4.27872	15.1738	13.0794	6.80332	16.6111	18.0028	11.7803	6.93079	17.5582	13.9591	11.0935	9.48051	8.45682	18.8668	14.4122	13.1476	6.19714	6.00762	5.02408	9.79787	9.98953	8.52187	5.18611	5.77261	5.13668	9.94941	11.6175	9.65827
6p22.1	NM_080593	85236	HIST1H2BK	histone cluster 1, H2bk	1.06356	0.0889038	8.72519e-05	0.00151431	240.172	179.879	246.005	264.098	192.782	172.247	125.959	352.202	279.823	161.14	275.871	107.161	119.277	314.156	259.652	211.237	103.831	262.296	270.241	240.387	130.966	142.681	107.332	160.158	156.582	128.962	229.472	241.289	180.052	57.1829	45.0698	56.3154	154.337	119.326	152.8	98.6955	145.721	76.5038	137.783	165.46	186.935
3p25.3	NM_198560	375323	LHFPL4	lipoma HMGIC fusion partner-like 4	0.741316	-0.43184	8.77202e-05	0.00151431	3.91703	1.8417	0.593627	0.531419	1.29604	1.96376	5.99776	1.62788	0.730973	3.40237	0.506652	4.57304	6.21578	3.66021	0.892917	0.98572	5.96087	0.997975	0.751102	1.29791	5.49672	2.13847	0.093489	2.83784	3.38238	4.1517	0.692004	2.34375	1.03984	12.5602	12.8546	14.2517	0.789847	0.862837	0.940261	5.49883	5.98243	4.77326	2.58788	2.93366	3.46841
2p11.2	NM_016494	51255	RNF181	ring finger protein 181	1.07784	0.108146	8.74618e-05	0.00151431	73.5913	60.8823	90.3137	80.0917	73.8286	54.5973	59.7222	101.698	94.6661	48.967	81.7278	33.3811	41.6035	82.54	85.5465	69.3546	33.4308	80.9697	68.2754	55.3189	69.2569	108.869	62.177	53.1486	50.5877	50.1217	48.6202	76.5254	64.3717	35.2009	34.6685	31.7567	43.8138	35.2514	44.1196	43.5637	52.4181	38.8736	59.3438	63.2275	63.3639
Xq22.2	NM_032926	85012	TCEAL3	transcription elongation factor A (SII)-like 3	0.688668	-0.53812	8.75685e-05	0.00151431	5.91733	7.04387	4.44157	1.45694	3.3925	8.63599	4.27532	5.23911	7.74538	11.0559	3.47416	3.17647	9.62275	2.06552	5.44361	6.59596	5.2349	2.42111	2.78223	1.89014	12.6638	16.4241	4.02825	14.9921	12.4371	11.0306	6.21482	6.68289	8.39102	24.5479	20.4617	25.5199	9.32599	7.93484	7.61927	5.2565	3.47281	6.15037	9.26224	6.242	6.99094
3q29	NM_006241	5504	PPP1R2	protein phosphatase 1, regulatory (inhibitor) subunit 2	0.827255	-0.273596	8.78974e-05	0.00151475	5.35172	7.97928	13.3305	11.501	10.2333	10.0729	6.7418	9.41324	7.96732	15.0062	5.27851	12.0306	10.6184	4.63235	10.1784	12.5164	9.16111	8.23633	7.63511	6.84904	6.83835	12.4166	14.6591	12.9565	15.6996	13.5425	11.2002	16.3371	14.0703	14.7017	13.884	12.5817	9.44008	9.98375	11.6382	8.45333	14.8445	12.6921	12.7079	11.236	13.0423
5q35.3	NR_045680	100859930	HEIH	hepatocellular carcinoma up-regulated EZH2-associated long non-coding RNA	1.44163	0.527696	8.93344e-05	0.00153686	12.7516	8.63932	6.35258	5.47868	8.82501	7.27457	7.78374	5.96544	7.88249	6.27687	9.03388	5.93671	6.79469	10.7178	9.43463	8.9819	6.10449	9.22618	5.1129	5.69426	10.6306	4.99866	8.18091	6.51911	5.00923	5.82422	5.40063	4.21371	3.90358	5.35914	5.14635	5.88145	9.18089	7.62227	9.70605	4.07925	3.67377	3.42766	6.09201	8.36713	8.54308
15q11.2	NM_005678	8926	SNURF	SNRPN upstream reading frame	0.920192	-0.119993	9.04278e-05	0.00155299	64.0418	94.2252	93.7671	100.761	89.8714	83.3256	83.6001	141.559	87.4415	93.0941	49.3948	84.4574	100.182	54.2503	87.3487	100.953	91.4098	99.4827	94.6669	72.0994	119.042	156.948	58.4987	88.4115	109.614	96.6932	95.9756	98.6366	88.0563	147.131	143.708	133.479	98.2346	93.1709	104.896	85.5652	115.83	102.126	111.799	92.0695	97.8022
10q24.32	NM_015062	23082	PPRC1	peroxisome proliferator-activated receptor gamma, coactivator-related 1	1.36274	0.446512	9.09593e-05	0.00155944	3.34952	6.0363	8.25191	4.58876	4.52256	4.53488	4.23886	2.41393	9.15884	4.42915	5.56489	2.27811	2.60899	2.50937	6.54215	5.99915	3.43339	5.47538	6.65135	4.32523	3.17718	2.01928	7.31455	4.30952	4.551	3.11458	3.56256	4.0448	3.38635	1.56724	2.18593	2.52305	4.95205	4.30941	4.46919	3.65041	2.21577	2.56013	3.65413	4.55948	4.83717
14q21.2	NM_017658	54813	KLHL28	kelch-like family member 28	0.696297	-0.522224	9.12493e-05	0.00156006	1.46833	4.30136	2.42329	2.10632	2.9736	4.52969	1.85456	6.80021	1.7525	11.0809	0.96749	5.69386	8.33021	1.42546	3.87902	4.9311	7.87982	3.6405	4.10967	3.64151	3.08759	6.12346	4.28238	6.36872	6.421	6.22048	5.79981	6.68436	7.63662	6.76957	7.14006	6.50908	4.54745	6.04232	5.29269	5.12384	5.7426	8.05197	6.70272	5.83988	6.02362
6q24.2	NM_007124	7402	UTRN	utrophin	1.17241	0.229474	9.13086e-05	0.00156006	2.45396	5.61048	4.88322	2.6256	5.49465	7.48614	2.65925	3.78655	8.49471	6.42196	4.34168	1.0837	3.67355	1.27437	7.33143	7.7893	3.54061	9.21379	8.07797	6.91855	3.02364	2.78661	12.0561	3.23599	4.01376	2.21093	6.49087	4.74379	8.42072	1.44498	1.72295	1.70704	5.29316	5.70565	4.2862	3.64036	1.8405	3.386	5.03987	4.87209	5.49314
3p11.1	NM_003663	8545	CGGBP1	CGG triplet repeat binding protein 1	0.791902	-0.336607	9.15597e-05	0.00156168	5.22064	14.5775	10.8064	8.52773	9.84671	14.4557	6.47218	8.35133	7.73616	17.3669	5.30831	13.5583	15.4749	2.96196	11.2016	14.928	13.6431	10.6649	10.941	11.1792	7.2222	11.5433	12.8038	13.1833	14.7418	13.0667	15.9535	16.1859	16.335	21.1697	21.2431	16.4961	14.3752	15.2761	17.1232	13.1377	14.3662	16.7951	16.3644	13.6381	14.1617
3q13.33	NM_018266	55254	TMEM39A	transmembrane protein 39A	1.17825	0.236646	9.20111e-05	0.0015667	2.62488	9.58529	9.29056	7.71024	8.65209	9.15386	2.75997	4.03408	7.64023	3.74524	7.64079	2.26558	2.924	1.81839	9.6869	10.6134	2.50112	7.83144	7.20239	6.15932	2.95431	4.62865	13.169	4.68512	6.13465	4.41143	8.73472	6.1396	8.3341	1.85884	1.94419	1.57383	7.10402	6.89799	7.4454	3.91594	3.05558	4.0003	8.26573	7.50419	6.39932
17q21.31	NM_198475	284069	FAM171A2	family with sequence similarity 171, member A2	0.854523	-0.226808	9.32811e-05	0.00158292	31.6207	22.7423	16.0318	15.259	13.4879	12.63	30.9233	25.298	21.8753	19.5796	18.0566	23.4487	19.1575	25.4448	19.3937	16.9915	28.7581	14.8181	13.0693	17.5615	34.3988	18.6861	6.51703	21.623	24.9396	28.6519	19.7548	16.9799	16.8654	26.8551	26.8454	29.4962	32.5196	25.321	30.9847	16.6944	16.7349	15.0536	20.0968	18.2742	25.4257
12q23.1	NM_000895	4048	LTA4H	leukotriene A4 hydrolase	1.05379	0.0755902	9.32669e-05	0.00158292	12.3593	24.8827	31.491	39.3939	33.274	31.7126	11.9836	42.0453	35.1285	25.3815	25.975	14.4724	19.7082	7.78079	39.3328	44.7888	17.7002	37.8531	47.8881	37.5483	18.0521	32.3359	33.8086	22.4407	22.3068	18.3102	34.83	24.9552	31.4263	13.2384	12.1355	10.7421	36.8976	40.8117	41.4222	12.6037	11.1769	21.9052	31.6478	27.822	26.9349
1p32.3	NM_174936	255738	PCSK9	proprotein convertase subtilisin/kexin type 9	1.70611	0.770714	9.50094e-05	0.00160951	5.30659	6.85038	2.58613	2.95034	2.17521	2.04186	4.40436	0.69216	5.75054	5.04924	5.86162	2.10864	2.31499	4.07485	2.65762	2.34663	2.45583	3.15937	1.90752	1.94215	4.54571	2.0538	0.310862	1.60061	1.18725	1.35387	1.16578	2.06259	1.56806	0.731607	0.644102	0.400488	1.03024	0.832192	0.958113	1.63187	1.54145	1.5454	1.94204	1.63935	2.17179
17q25.1	NM_000154	2584	GALK1	galactokinase 1	1.24032	0.31071	9.58277e-05	0.00161515	25.3698	24.1899	25.3285	27.3694	16.8063	12.7209	20.8906	13.5707	31.7494	8.86197	30.8997	8.89473	7.38042	22.0351	23.9324	20.328	6.75923	18.0845	13.9084	15.8012	21.722	15.62	16.7127	12.5283	12.8604	12.1713	8.90924	11.3664	13.8009	5.1671	4.47187	4.74978	11.7954	9.29484	11.5935	8.43842	8.16931	7.07518	12.1874	17.0355	17.4354
1p33	NM_006004	7388	UQCRH	ubiquinol-cytochrome c reductase hinge protein	0.958219	-0.0615723	9.56492e-05	0.00161515	149.548	211.238	125.707	166.231	171.077	147.882	161.995	165.625	139.339	156.677	126.994	143.032	174.844	169.011	135.916	161.14	139.135	168.817	141.67	109.425	124.007	307.018	97.7085	181.713	202.131	186.495	133.832	156.161	162.363	164.116	150.2	134.286	127.925	119.595	139.91	110.571	157.844	133.309	180.213	156.062	170.295
2p11.2	NM_006590	10713	USP39	ubiquitin specific peptidase 39	1.16772	0.223692	9.57061e-05	0.00161515	5.1121	10.8628	9.61853	14.2553	12.6075	11.3474	8.74851	15.2242	13.2033	13.9242	8.88631	6.89834	7.36084	7.30971	10.9145	16.068	8.49086	17.8276	16.794	15.4694	9.07422	12.7172	9.08801	5.0284	8.8023	8.12253	15.3425	13.9029	9.38887	10.6132	6.91268	8.28397	7.78623	9.36546	12.9732	7.22038	5.45268	6.17855	9.2455	7.44187	9.34671
7q32.1	NM_001219	813	CALU	calumenin	1.04581	0.0646212	9.67027e-05	0.00162331	17.793	70.7697	54.5575	38.1386	70.0121	75.5508	20.1018	33.4716	76.9534	34.1691	61.5728	12.8392	24.4307	11.1355	77.3586	73.4037	17.748	45.6917	52.518	40.4134	23.3611	44.0546	73.7668	43.6134	42.6249	28.6642	72.3599	38.4753	58.1893	13.9068	13.7466	12.7922	47.6388	48.4629	51.4907	18.3367	16.1659	25.7088	56.2822	50.9697	50.8962
15q22.31	NM_017851	54956	PARP16	poly (ADP-ribose) polymerase family, member 16	1.1603	0.214501	9.68e-05	0.00162331	4.8972	5.63408	6.27627	4.74069	5.19922	5.12111	4.61065	4.30711	4.73651	4.868	4.37639	3.18169	4.22888	4.0662	6.24037	5.72339	3.57125	6.3893	4.83759	4.85493	4.31075	2.45789	4.74522	3.60535	3.5722	3.50201	4.15443	6.37972	4.75307	2.82804	2.79772	2.98274	5.46899	4.20638	5.02968	3.68446	2.56611	3.70564	4.69141	4.97701	5.3615
19q13.2	NM_006297	7515	XRCC1	X-ray repair complementing defective repair in Chinese hamster cells 1	1.19439	0.256279	9.65566e-05	0.00162331	21.6388	16.0677	26.3707	25.1779	19.5825	16.6328	18.8438	27.1978	28.3664	17.2612	19.3018	14.2289	20.9276	22.1643	24.6629	23.39	16.1194	27.4313	23.6385	23.5294	12.8246	6.53094	19.7252	13.183	13.8828	12.7492	9.17904	18.2439	13.352	11.2926	11.8366	11.3947	15.2937	13.3776	14.3815	12.0797	14.1769	11.2036	14.7122	14.8927	16.4806
17q21.33	NM_018509	55379	LRRC59	leucine rich repeat containing 59	1.08824	0.121997	9.73294e-05	0.00162855	24.4041	46.4615	52.3801	39.3421	40.0602	36.2047	24.7978	31.9728	42.436	28.2305	30.4235	21.0618	26.3304	20.9641	38.2561	44.7096	22.4426	42.1221	35.9052	31.154	23.2632	15.9232	51.8308	38.7561	48.6608	42.5616	23.6289	35.1037	22.3895	25.5103	24.6959	23.5782	24.0625	20.3143	25.3499	21.7416	21.6417	22.4611	30.5425	28.8654	26.2607
3q26.2	NM_001099645	200916	RPL22L1	ribosomal protein L22-like 1	1.27772	0.35357	9.74386e-05	0.00162855	10.6884	16.5297	14.9415	13.8717	11.7246	8.83858	6.73528	8.61434	8.86525	6.62217	6.9991	5.53053	5.50971	7.45078	12.3574	14.4586	3.41439	12.5778	12.6029	5.33519	3.08445	6.47844	7.56448	9.49839	7.14671	6.14851	4.75032	5.61265	5.84879	2.35707	1.75794	1.93752	7.47478	5.79226	6.56559	4.40359	7.00039	5.59649	6.94252	7.60109	7.19346
4p16.3	NM_007100	521	ATP5I	ATP synthase, H+ transporting, mitochondrial Fo complex, subunit E	0.959909	-0.059031	9.83127e-05	0.00164041	237.335	277.114	286.382	343.054	251.446	208.72	285.328	414.601	273.602	190.958	268.228	150.994	187.492	334.527	266.03	237.445	137.1	256.545	226.409	161.117	268.4	464.233	272.23	301.475	277.777	250.154	216.399	279.295	288.932	202.943	179.244	153.783	241.076	203.533	249.495	191.21	252.236	202.266	251.26	270.427	293.848
4q22.1	NM_153757	266812	NAP1L5	nucleosome assembly protein 1-like 5	0.748354	-0.418207	9.89745e-05	0.00164869	2.60989	3.39263	3.36164	2.92203	2.42869	4.1665	5.05436	3.06713	1.90913	10.0438	2.2547	9.29234	12.587	2.00282	3.1756	4.76068	10.9282	4.13686	3.10308	2.72122	5.37884	9.36472	3.15549	7.91925	8.82224	7.5571	4.39702	7.81797	5.54595	18.0308	16.5908	14.7688	5.6858	6.60245	6.35554	5.76639	8.60576	9.94607	7.07449	4.65548	4.79589
4q27	NM_005033	5393	EXOSC9	exosome component 9	1.28889	0.366133	0.000100564	0.00167238	1.88206	5.53386	6.74712	9.66786	7.86347	6.17235	3.46349	10.9083	9.00988	11.9151	3.99106	5.08811	7.61837	4.88007	10.7215	10.6915	5.19895	9.2516	8.1066	6.50935	7.97692	14.7119	8.24503	5.90722	4.83031	4.31051	7.15554	11.3128	10.7446	7.10457	6.22781	6.57674	4.16025	4.76704	5.46822	3.92328	3.42452	5.69305	8.90373	5.75706	8.4355
3q25.31	NM_003875	8833	GMPS	guanine monphosphate synthase	1.07427	0.103354	0.000101007	0.00167695	9.18157	18.9951	19.6656	26.9665	25.0564	25.925	10.9669	36.2462	21.4289	31.1516	16.0575	15.8089	28.2254	8.60187	34.8571	31.4045	23.4219	35.2005	48.404	38.6147	19.2324	30.058	28.9277	23.62	23.4497	16.9172	30.7354	27.941	31.413	14.8668	14.0811	16.2342	20.6946	20.8501	21.0797	13.548	8.90714	15.3512	26.5799	22.7516	24.4331
6p21.1	NM_001271882	221424	LRRC73	leucine rich repeat containing 73	0.655913	-0.608423	0.000101476	0.00168063	4.736	1.15202	0.072372	0.100547	0.678967	0.985155	5.57344	1.31141	1.72469	0.814251	1.52706	2.0418	1.23877	2.22983	2.16656	1.69684	1.26261	0.371832	0.841747	0.654587	2.17192	2.51141	0.397266	2.05027	2.34249	1.88233	0.53702	2.02554	3.2089	2.56847	1.76662	1.87782	0.587585	0.658488	0.872199	1.99604	2.62409	1.86613	2.79047	3.39289	2.07727
13q34	NM_001286278	10426	TUBGCP3	tubulin, gamma complex associated protein 3	1.32745	0.408656	0.000101565	0.00168063	2.61017	3.66393	2.98152	3.29849	4.013	4.05281	2.43557	7.49157	3.424	3.75244	1.99482	3.20206	4.73634	2.10837	5.27682	4.92229	4.70331	6.27471	7.85756	6.01204	2.44477	3.35745	3.81507	2.30714	3.49964	3.24235	3.87205	4.31795	3.01203	2.51095	2.88865	2.68445	3.76895	3.73678	3.81334	3.85751	3.29007	3.10953	3.0297	2.63788	2.79455
14q32.33	NM_017955	55038	CDCA4	cell division cycle associated 4	1.24604	0.317354	0.000101856	0.00168264	9.34621	13.4741	11.6946	14.7053	6.38915	7.52652	8.89439	15.0254	12.8392	6.24635	13.3997	3.42089	4.13241	11.1139	12.2672	12.0371	3.86997	13.3205	13.0932	12.2247	6.3545	3.76815	5.10614	7.81922	8.64587	7.45505	5.39458	11.789	7.34104	3.23031	2.91581	3.6242	7.10739	5.87831	6.7621	4.78629	7.18344	3.64299	7.0137	9.0233	9.67791
Xq24	NM_024528	79576	NKAP	NFKB activating protein	1.16838	0.224509	0.000102699	0.00169376	4.86603	7.56854	5.45541	6.15929	7.06705	7.63749	5.03252	13.7415	7.39594	10.5529	4.95917	4.2134	6.4887	4.61436	8.21101	8.01102	6.49147	10.2341	9.80536	10.9994	8.7308	10.1656	10.9189	7.86841	7.34796	5.66162	8.80605	8.21851	10.1993	5.35662	5.43568	6.31519	6.93325	6.47856	7.41579	3.45466	3.18218	4.6482	7.90704	6.16651	6.2538
22q13.31	NM_181335	23779	ARHGAP8	Rho GTPase activating protein 8	1.48309	0.568606	0.000102921	0.00169463	3.81027	4.12939	11.1982	7.19661	4.25355	4.24469	3.9081	2.24118	7.33242	2.71616	3.32976	1.47078	4.49181	2.29664	8.1357	8.04398	3.68788	6.61397	4.52342	4.50347	2.40516	1.05204	12.3892	2.32009	3.09408	3.05422	2.6709	2.04121	2.00812	1.26888	0.323773	0.488944	5.23672	6.86913	5.97978	1.69146	1.54317	2.40849	2.76499	2.50343	1.77888
1p36.11	NM_052943	115572	FAM46B	family with sequence similarity 46, member B	1.71869	0.781305	0.000103117	0.00169472	1.29697	1.32292	6.83148	5.97283	2.17719	1.79221	1.13455	1.52364	4.30011	0.962336	3.94898	0.231819	0.368641	1.9487	3.90164	4.67928	0.568267	7.76954	10.301	8.81472	1.55727	0.810993	9.84536	1.43301	1.89156	1.14671	1.40304	0.826017	1.16768	0.195667	0.258286	0.288736	3.33777	2.79141	3.83038	0.601755	0.701873	0.609225	1.441	1.92893	1.70461
20q13.12	NM_002466	4605	MYBL2	v-myb avian myeloblastosis viral oncogene homolog-like 2	1.36746	0.451494	0.000103266	0.00169472	7.92141	9.76545	16.9658	11.6786	9.40591	8.90764	4.84589	19.2315	18.5622	8.742	13.3852	3.86782	4.01307	11.2378	14.5969	12.4196	5.49405	13.3928	19.1822	20.7509	6.37674	1.62918	5.44686	8.20712	8.96631	5.40707	9.21091	15.4395	8.88537	3.22689	2.15119	2.31655	6.82934	5.88549	5.75198	7.14958	5.58256	3.5495	6.85104	9.20164	9.44554
20q13.32	NM_016045	51012	SLMO2	slowmo homolog 2 (Drosophila)	0.606978	-0.720283	0.000104664	0.00171483	1.54978	3.24392	4.16955	5.18168	3.09369	8.52485	0.741199	4.79025	1.07908	12.2003	1.38678	6.55601	7.1742	1.26627	4.68929	6.8278	5.68468	4.17449	5.62305	2.79599	3.07835	9.48956	4.60736	11.5605	12.9497	11.6237	12.5555	11.4653	9.92708	8.27173	7.53656	6.75808	7.13517	9.31459	7.3788	5.53994	7.87778	7.50436	8.90979	6.92179	8.69027
12q24.13	NM_004416	1840	DTX1	deltex homolog 1 (Drosophila)	0.794943	-0.331076	0.000105173	0.00171974	4.54504	2.45249	1.10026	1.27441	1.68661	1.89389	6.3121	2.45396	1.10124	3.98081	0.836191	6.26307	6.22865	4.49601	1.16436	1.29571	7.88411	1.52745	0.905979	1.0465	6.68885	2.61807	0.658713	3.52683	4.13347	4.03607	1.48001	2.01015	1.10743	8.34609	7.77457	9.84091	3.11254	2.64768	3.1153	3.74102	3.916	3.75059	1.9876	2.14926	3.4551
9q21.13	NR_026890	653162	RPSAP9	ribosomal protein SA pseudogene 9	1.79378	0.843001	0.000105308	0.00171974	10.0504	7.18057	6.05713	11.4236	7.92944	5.64997	10.6035	13.6017	8.60105	6.31041	11.846	5.32716	6.29522	17.6033	11.7493	10.4063	3.49055	12.6569	13.6576	11.3063	11.5378	13.7472	5.7059	6.54052	6.22408	4.76578	5.52186	8.72447	6.694	6.79038	7.11848	6.48639	3.73384	3.20431	4.20441	4.83367	6.45313	5.00608	5.86546	7.593	7.48681
11q21	NM_144664	143684	FAM76B	family with sequence similarity 76, member B	0.801444	-0.319326	0.000105881	0.00172628	1.05299	1.96021	1.98614	1.68077	2.17328	2.17833	1.01025	2.24192	0.944376	5.56917	0.59495	3.13644	3.30209	0.716294	1.99708	2.33598	2.81683	1.57589	2.22275	1.27357	1.90871	3.0771	2.15398	3.40657	3.02388	2.92801	3.49023	3.5889	3.43738	5.115	4.19878	4.25446	2.07624	2.93994	2.84364	3.33137	3.10037	4.02348	2.8377	2.80571	2.77579
8q24.13	NM_014109	29028	ATAD2	ATPase family, AAA domain containing 2	1.18614	0.246271	0.000106506	0.00173363	1.7754	4.41546	3.5453	2.95275	5.23215	6.31318	1.35129	7.14886	4.44638	7.56566	3.69097	2.4458	5.58035	1.96948	8.07711	6.66515	4.15135	6.58395	9.82786	7.20387	2.30807	4.17113	4.1094	4.79353	4.59117	3.41465	9.76012	9.1832	9.60404	1.6894	1.48879	1.75615	6.59186	6.63306	6.01476	3.50569	2.1639	3.33327	5.09912	5.93467	5.16279
2q24.3	NM_024969	80034	CSRNP3	cysteine-serine-rich nuclear protein 3	0.659712	-0.600091	0.000106982	0.00173855	1.55165	2.50104	0.981907	0.391275	2.596	4.69559	2.77244	2.21865	1.29413	6.70529	0.56626	4.49557	7.53352	0.839358	1.21062	1.06324	6.23457	1.26345	0.457271	0.7044	3.33504	5.65095	5.5e-05	2.9337	3.37667	3.64307	3.13884	3.16992	2.53518	12.1104	14.0919	11.561	2.12146	3.38171	1.77554	5.86419	7.92833	8.8785	3.20862	3.00838	2.68888
5q14.1	NM_002439	4437	MSH3	mutS homolog 3	1.2225	0.289835	0.000107369	0.00173918	1.51924	3.09734	2.72096	3.40467	3.88965	4.33848	2.51282	4.7188	2.81592	4.89713	2.64237	3.048	4.03746	1.79667	3.7156	4.30627	3.97726	4.1978	5.25499	4.12467	2.90876	4.94465	4.54666	2.71987	2.82051	2.23391	4.91472	4.5607	5.53457	3.17993	2.97431	3.03959	3.04379	3.06937	2.40677	2.52811	2.61313	2.96971	4.37207	3.63925	3.75354
12q24.23	NM_001002	6175	RPLP0	ribosomal protein, large, P0	1.07843	0.108934	0.000107292	0.00173918	1966.72	2760.9	1802.12	2151.13	1813.5	1284.68	1983.13	3536.3	2263.93	944.696	2567.56	865.216	955.959	2098.24	2097.94	1698.65	865.923	2153.33	2221.8	1973.71	1728.99	1845.29	1187.8	1639.06	1614.26	1537.31	1291.1	1410.95	1311.98	628.534	575.414	596.602	1133	949.494	1032.84	927.612	1385.7	996.462	1343.4	1622.81	1783.61
21q22.3	NM_018964	54020	SLC37A1	solute carrier family 37 (glucose-6-phosphate transporter), member 1	0.832567	-0.264362	0.000107909	0.00174509	5.13203	1.69843	4.89441	2.95513	2.54327	2.51291	3.54803	1.18579	2.1668	3.16431	1.84425	2.97563	4.8411	3.16994	3.28575	2.66054	4.0438	2.3945	2.54846	2.23068	2.92043	1.33831	4.43985	2.86713	4.17488	3.52478	3.36026	2.76641	1.63175	6.46381	6.57274	6.90503	10.4849	8.17883	9.34558	3.90935	2.98799	2.65895	2.76054	3.18836	4.00056
Xp11.3	NM_006915	6102	RP2	retinitis pigmentosa 2 (X-linked recessive)	0.80325	-0.31608	0.000108122	0.00174569	2.15692	3.01673	3.09055	3.41714	2.71902	3.52205	2.23441	3.51628	1.73449	3.51579	1.86943	2.84051	3.18933	1.37097	3.91276	4.21373	2.7125	3.24206	4.44637	2.63149	1.79005	4.24951	4.2108	3.90196	4.39419	4.04547	3.76969	5.43764	4.20399	3.77652	3.36771	3.18973	2.61577	3.23297	2.87544	3.71055	5.1356	4.3171	4.64038	3.77526	4.21797
2p25.1	NM_016207	51692	CPSF3	cleavage and polyadenylation specific factor 3, 73kDa	1.13422	0.181698	0.000109234	0.0017608	5.53996	9.10782	14.3579	16.6673	14.3564	14.3802	6.34361	22.6961	14.5604	20.4959	11.0998	9.06226	15.3575	7.1966	21.0162	18.6583	11.3094	18.2709	25.4135	18.3157	14.7961	21.9397	21.7444	14.5909	13.246	10.6402	19.0799	17.235	18.2217	10.8252	9.70698	9.79059	13.3781	14.7132	12.0046	6.92503	7.17963	9.40952	12.6226	11.7265	12.9364
1q21.3	NM_007185	11189	CELF3	CUGBP, Elav-like family member 3	0.712744	-0.488543	0.000109801	0.00176104	6.51891	2.8863	1.54976	2.47938	2.19368	2.53555	7.28187	4.86298	2.16071	8.2134	0.710669	11.8149	14.0129	6.94738	1.38334	2.22089	13.8064	2.07676	1.89104	1.94273	8.09762	4.49625	0.165497	7.15089	8.71323	10.7015	3.50162	4.54751	2.63464	9.50677	10.6381	11.7437	5.78122	4.16684	4.10815	7.34929	4.50196	5.5134	4.05983	3.62281	4.94093
17q11.2	NM_001304	1362	CPD	carboxypeptidase D	1.21222	0.277654	0.000109891	0.00176104	4.52515	10.5166	5.32225	6.6155	7.85654	8.48593	5.42547	7.52359	7.89921	7.23595	6.14853	3.78886	5.40992	2.39203	7.48733	8.79757	5.9295	10.8582	6.04476	9.10058	4.69647	4.22943	12.0526	3.3652	3.86405	2.77156	5.37813	4.22201	4.93219	4.12504	2.62354	4.61339	6.36655	5.12468	7.38575	4.89157	2.91774	3.13677	7.69245	6.39024	7.90563
14q13.1	NM_022073	112399	EGLN3	egl-9 family hypoxia-inducible factor 3	1.36239	0.446141	0.000109994	0.00176104	6.45133	5.0033	7.5894	5.5801	14.0049	11.2134	8.61549	1.6368	6.09568	8.68312	3.87111	7.12845	7.43395	6.58157	11.0084	13.5655	7.3184	10.3078	9.64287	8.32978	12.9838	14.54	4.1664	6.13455	8.23422	7.57917	3.06221	4.46177	4.96887	7.94496	7.07292	6.62173	3.12672	2.77885	3.17423	5.49431	6.77002	6.22684	6.65173	4.9306	4.74747
6q25.1	NM_138785	116254	GINM1	glycoprotein integral membrane 1	1.08614	0.119207	0.000110308	0.00176104	8.41465	19.2684	25.0735	26.487	21.9734	23.8256	14.4682	13.2832	12.8435	18.1041	11.6477	14.4004	17.1275	6.02984	24.1866	34.1292	15.4789	18.4344	21.7807	17.7765	11.919	22.2663	30.7522	16.2405	16.0561	11.4608	16.5841	14.0189	14.2265	12.5881	11.1846	9.74234	18.7933	20.8462	23.7026	9.27435	11.2483	15.4314	20.5465	15.0293	15.4816
17q21.33	NM_016424	51747	LUC7L3	LUC7-like 3 (S. cerevisiae)	0.648893	-0.623947	0.00010994	0.00176104	2.09528	4.25449	3.59298	2.76108	3.16224	6.26016	2.78221	3.98727	1.52571	23.9891	1.03739	7.43222	19.2066	3.33306	16.7502	10.3102	12.3976	4.33819	5.68966	4.95349	4.85905	7.57271	5.47959	6.82507	5.60156	6.47601	10.2531	8.43598	15.5081	10.2135	14.9011	16.2331	10.3424	12.3037	8.19173	13.7849	8.23765	16.1459	8.94539	9.54683	8.47785
2q36.3	NM_152527	151473	SLC16A14	solute carrier family 16, member 14	0.730353	-0.453335	0.000110272	0.00176104	3.45369	4.40142	1.95048	2.17311	3.69148	4.64149	5.38025	5.3412	1.47113	9.45932	1.171	6.63407	8.50218	2.75239	3.30347	4.51544	7.3262	4.31262	3.56854	4.11113	6.8042	9.39503	2.32569	7.69671	7.85535	8.2309	4.13659	7.63506	4.94526	16.6964	16.7969	14.898	4.6755	3.97087	3.90356	7.14938	8.98106	10.1473	5.72858	5.52896	5.50962
11q13.2	NM_207354	338692	ANKRD13D	ankyrin repeat domain 13 family, member D	0.79242	-0.335663	0.000110571	0.00176242	14.7319	8.42882	4.92713	3.36974	5.84859	3.80591	14.7964	6.6515	6.09303	4.14406	7.45864	3.86537	5.38578	9.44762	7.72683	5.65786	3.30744	2.40637	4.14173	3.80891	7.85741	5.42327	4.08061	5.78813	7.05689	8.61268	3.04901	5.25306	4.98948	11.2005	9.74103	11.9602	6.54074	4.70081	5.68617	7.34062	8.31025	6.67269	7.55122	9.20726	9.77005
17q22	NM_182569	284161	GDPD1	glycerophosphodiester phosphodiesterase domain containing 1	0.784299	-0.350525	0.00011148	0.00176844	1.93825	2.53363	1.28545	1.81425	1.48649	1.95269	2.99154	3.22298	0.587323	3.73089	0.87942	3.66575	3.76776	1.52559	1.65084	2.40725	3.98168	2.16723	2.04372	2.42212	3.25172	4.51764	0.660028	2.58833	2.23635	2.44994	2.33502	3.5468	2.12112	5.76642	5.18482	4.81866	2.59676	2.84195	2.82688	3.0819	5.136	3.77301	2.19541	2.46153	3.18312
6p22.3	NM_001546	3400	ID4	inhibitor of DNA binding 4, dominant negative helix-loop-helix protein	0.710149	-0.493806	0.000111316	0.00176844	18.639	30.1892	13.3181	12.1021	12.6268	17.9985	14.799	14.3285	6.35104	61.0447	4.21218	29.9227	24.7234	25.2403	15.607	22.135	22.4708	19.689	14.5376	14.1517	18.5431	26.1705	7.38446	52.0303	48.4994	51.7802	28.7938	44.1152	24.4919	37.1343	36.3512	33.2273	10.3492	11.5757	11.7285	42.2798	50.8742	50.2977	39.7443	38.4068	40.3582
17q25.3	NM_001282281	5831	PYCR1	pyrroline-5-carboxylate reductase 1	1.23086	0.29967	0.000111246	0.00176844	28.9937	60.14	27.4167	45.2513	32.982	42.7838	27.343	17.8744	84.7173	9.85964	74.9314	6.94093	9.48264	23.6991	46.4423	42.2506	7.1559	28.2322	29.1589	17.007	25.3663	16.204	18.6503	22.739	31.9104	18.8739	21.2093	12.1415	6.04862	6.66669	3.07065	1.36811	9.29314	13.9541	20.0286	17.6012	17.9397	16.772	25.5008	28.0728	30.0164
4q26	NM_014822	9871	SEC24D	SEC24 family member D	1.1236	0.168131	0.000112795	0.00178646	7.26703	26.2894	27.6452	19.3806	28.5321	26.9737	11.1007	5.43123	34.011	9.65852	23.9481	4.28776	6.97254	3.61569	28.2371	30.9958	6.44107	20.3858	16.1427	11.8856	8.07204	10.1732	42.1621	13.8782	17.1666	11.1319	23.381	16.3459	20.8375	4.40249	3.99937	4.15757	14.5056	14.2432	15.5083	10.0191	6.86741	10.3264	22.3298	20.0788	20.0832
1p34.2	NM_006347	10465	PPIH	peptidylprolyl isomerase H (cyclophilin H)	1.19134	0.252589	0.000113308	0.00179174	7.33423	12.3432	17.512	17.2888	21.2035	16.3499	6.23983	35.0999	14.4316	22.531	11.9756	10.7039	16.9747	6.63879	21.0239	18.4503	10.2473	22.4605	27.9106	19.0262	15.9016	30.247	17.4805	13.3596	17.4302	12.644	24.9907	21.4848	22.6812	16.0562	14.053	12.3722	11.8905	8.91457	10.5919	10.0395	8.23185	10.3326	14.2657	11.4958	13.3683
11q24.2	NM_152713	3703	STT3A	STT3A, subunit of the oligosaccharyltransferase complex (catalytic)	1.08495	0.117623	0.00011424	0.00180362	9.66676	38.708	31.7572	26.4224	39.0258	42.7129	16.9173	39.1174	41.7203	23.4465	32.0536	9.38696	18.4952	7.17656	44.1967	43.7716	12.0164	29.5694	31.4884	28.4423	20.8068	30.9092	45.919	20.4433	22.6822	15.2746	42.0519	28.1884	40.3177	17.2715	16.8665	15.021	21.409	23.5599	24.0979	13.1098	10.9973	15.9301	32.3248	29.9269	29.437
1q41	NM_018650	4139	MARK1	MAP/microtubule affinity-regulating kinase 1	0.733825	-0.446492	0.000114921	0.0018115	2.83582	5.01103	1.78038	2.01931	3.01052	4.11844	6.21032	3.54175	2.32109	7.84673	1.62825	2.15207	6.31018	1.81456	3.5587	3.77356	6.54705	1.01664	2.21204	3.33276	5.27562	4.75717	3.03836	4.47095	2.96519	3.06191	2.49883	4.81246	5.5998	8.01678	7.77177	8.26052	2.99697	3.22305	1.61733	3.52541	2.43403	4.74173	6.94287	5.30891	5.6956
17p13.2	NM_019013	54478	FAM64A	family with sequence similarity 64, member A	1.37979	0.464446	0.000115522	0.0018181	11.3979	10.0373	10.4979	15.8795	7.59955	5.39411	6.21749	26.3569	10.7141	15.6479	12.3546	11.587	12.4157	30.0963	15.3499	14.9257	11.3996	21.8972	23.9074	18.8981	10.5934	8.11404	3.56991	9.47604	12.0207	9.4373	8.4848	26.6057	11.9293	3.21391	2.97751	2.97507	6.13883	5.46768	4.42275	8.69931	12.366	5.38679	5.35824	8.295	9.3742
5q22.3	NM_181836	51014	TMED7	transmembrane emp24 protein transport domain containing 7	0.762788	-0.390646	0.000115881	0.00182088	7.77665	22.9191	24.8378	18.1014	17.7118	25.958	8.60626	10.2644	8.36642	24.466	7.88054	14.0006	12.1975	5.38877	17.3898	23.914	11.5769	15.136	10.6639	8.94192	5.91716	13.9848	33.9927	31.2367	29.6344	27.6669	23.7797	31.6799	24.2516	17.8054	17.4033	15.7013	19.3335	20.3295	22.2832	18.8892	25.4185	22.1969	25.0241	22.6906	22.6185
3q22.1	NM_021203	58477	SRPRB	signal recognition particle receptor, B subunit	1.10269	0.141033	0.000116116	0.00182171	5.01563	17.8586	14.1877	19.0094	18.6636	20.3877	6.50472	21.0956	14.444	17.7079	12.8643	10.3138	14.8338	4.83809	22.9982	26.231	12.9444	15.6443	16.1387	15.3942	13.9337	27.5974	23.9018	19.284	21.5218	15.2983	16.5252	16.4912	18.6179	13.6233	10.9499	10.6017	11.1079	12.5912	12.4775	8.7533	8.04226	10.0504	17.7953	14.7564	16.024
17q23.2	NM_018304	55771	PRR11	proline rich 11	1.32787	0.409119	0.000116544	0.00182555	1.2868	2.07718	3.56841	2.96284	3.18377	3.58657	1.12837	6.02901	2.5735	4.09962	2.74706	1.6577	2.24883	1.67199	3.5033	3.93817	2.76493	5.40841	5.76837	5.74503	1.75854	1.86508	1.5606	1.82433	2.23034	1.44127	5.38238	5.85065	4.93256	1.18441	1.18112	1.43813	2.08312	2.61231	2.41207	2.65376	2.84764	2.29114	2.98852	2.78026	2.62143
5p13.2	NM_018321	55299	BRIX1	BRX1, biogenesis of ribosomes, homolog (S. cerevisiae)	1.12033	0.163924	0.000117867	0.00184338	5.2235	12.4866	21.2449	19.5471	17.7804	17.5625	6.17108	31.9224	14.7528	19.3408	10.343	13.2746	14.4607	5.50386	17.8757	24.3677	14.2826	16.8643	27.4662	21.9444	13.3612	22.2079	19.1681	23.9217	18.2525	14.5645	19.4293	18.011	17.858	13.3388	10.3247	8.88102	10.7423	13.0935	15.6287	7.44027	8.14434	9.79211	15.2332	14.0684	15.1173
15q25.2	NM_016073	50810	HDGFRP3	hepatoma-derived growth factor, related protein 3	0.79704	-0.327277	0.000118402	0.00184886	8.87002	15.3853	15.8236	13.7082	16.7334	23.627	11.2832	20.6355	11.6316	36.7164	6.87741	28.3436	33.4514	6.61149	14.6301	19.1473	30.404	13.6171	15.5985	12.9322	16.2877	27.635	15.5756	25.8169	25.3916	24.4215	29.9071	28.4247	20.9883	56.4814	48.6681	44.9355	20.8645	24.518	24.3789	18.9265	22.7427	28.3429	25.0212	20.1682	21.0538
7q34	NM_053035	51650	MRPS33	mitochondrial ribosomal protein S33	1.09145	0.126245	0.00011897	0.00185481	6.20566	17.7601	25.7943	30.9763	19.0644	14.1211	8.1308	22.5554	19.0305	13.6476	17.2478	10.1473	9.17011	7.18793	20.3409	23.2057	5.80568	18.4995	18.1975	13.6388	12.2995	23.8863	17.1077	13.4074	14.5415	17.4887	17.1163	15.4187	21.596	9.87168	4.59419	7.5448	17.5235	15.8452	17.5254	7.91532	9.90632	9.05756	22.2349	17.8805	18.786
2q31.1	NM_152384	129880	BBS5	Bardet-Biedl syndrome 5	0.789668	-0.340682	0.000119779	0.00186161	3.99205	5.24964	2.8302	2.5789	2.95145	3.24272	5.75927	3.49419	3.18959	4.65018	2.58795	2.65615	3.21709	2.30652	5.04749	5.06308	3.73971	3.02409	2.8058	3.46523	3.14381	2.99464	2.56607	3.46756	4.10311	4.07862	3.86654	4.85712	4.5013	4.85848	4.86438	3.70809	3.67298	3.72204	4.77262	4.78398	3.25786	3.67336	7.53173	5.0476	5.3404
15q25.2	NM_032856	84942	WDR73	WD repeat domain 73	0.890306	-0.167627	0.000119776	0.00186161	8.45301	7.20809	9.87862	9.05157	6.87018	6.88538	9.09862	5.76597	7.06029	10.4162	5.70305	4.74777	6.5978	8.95873	12.6437	11.8304	7.23481	10.5525	7.23948	6.88552	7.79712	6.67437	11.3921	12.3687	11.3606	9.74053	9.54806	12.1273	10.5096	9.7677	9.57451	9.8233	8.19335	7.69781	8.35631	9.95182	10.3066	8.36555	10.0552	10.7906	9.61859
6p22.1	NM_003509	8329	HIST1H2AI	histone cluster 1, H2ai	1.06802	0.0949347	0.000120066	0.00186316	483.459	384.992	374.029	549.849	355.105	270.449	237.583	743.31	525.217	282.795	639.589	191.387	193.371	731.971	393.784	331.547	188.496	556.113	545.856	611.407	234.701	294.069	77.5441	227.202	232.15	190.023	383.742	441.516	397.297	103.218	69.7115	92.0792	240.721	182.508	207.212	172.026	270.681	126.195	224.801	331.54	379.212
2q31.2	NM_152275	92104	TTC30A	tetratricopeptide repeat domain 30A	0.835078	-0.260017	0.000122934	0.00190471	1.81202	2.70506	1.94384	1.84356	2.22528	2.94816	2.56616	0.70428	1.58898	3.2726	1.21076	2.33098	3.30357	0.923269	3.04166	2.75718	2.04542	1.64228	1.77621	1.15755	2.06193	3.62736	2.48478	3.34705	2.81126	2.54579	2.89969	2.99225	4.48232	3.4359	3.11546	3.02988	1.90628	2.72295	2.53105	2.18638	2.08511	2.34863	4.01749	3.44905	3.56644
12q24.33	NM_145648	121260	SLC15A4	solute carrier family 15 (oligopeptide transporter), member 4	0.491905	-1.02355	0.000123924	0.00191708	6.76641	7.46365	5.56494	5.14126	4.64752	4.81699	8.08901	0	3.52445	0	2.84663	0.0279	0.041398	0	0	0	0.07561	0	0	0	5.33227	5.88955	6.692	4.82752	4.89823	4.76695	2.42453	3.04369	3.42763	6.92674	5.88876	5.98536	4.62301	4.07045	4.6508	1.93901	1.9391	2.20867	8.52959	7.60742	6.78944
7p22.3	NM_017781	54905	CYP2W1	cytochrome P450, family 2, subfamily W, polypeptide 1	1.76565	0.8202	0.000124234	0.0019182	1.20866	2.28941	8.87041	7.85381	5.90477	3.87744	3.93302	0	16.9257	0.128993	14.4398	0.102586	0.052025	0.269675	8.09106	7.49337	0.257344	4.58432	2.34729	3.84867	0.829936	0.471096	3.53978	1.37654	1.95333	1.53948	4.11806	0.799656	1.85305	0.080828	0.103613	0.092889	2.35157	2.04815	2.15274	0.702447	0.318895	0.793211	4.2207	5.21211	5.57023
9p21.1	NM_005802	10210	TOPORS	topoisomerase I binding, arginine/serine-rich, E3 ubiquitin protein ligase	1.19647	0.258787	0.000124381	0.0019182	2.16396	5.57441	3.97149	3.21674	5.24105	6.17739	2.62457	7.57174	5.41976	4.14597	4.02434	2.68838	6.02893	1.52996	7.67013	7.13964	3.95111	5.60371	8.37873	5.45792	4.3248	7.35507	6.93952	6.01382	4.80605	3.22641	5.2679	2.92284	4.1634	2.20345	3.40548	2.7651	6.449	3.64548	3.26515	4.18774	3.25423	3.88206	6.08454	4.7487	5.44081
2p25.1	NM_138799	129642	MBOAT2	membrane bound O-acyltransferase domain containing 2	0.842171	-0.247815	0.000125181	0.00192232	6.24608	7.24652	5.76987	6.56525	7.32098	10.4511	6.58496	6.71542	4.40587	13.2035	3.70113	9.56678	14.0098	3.78685	8.52597	9.4533	12.9038	6.96248	9.85403	9.48998	6.90378	10.3735	12.4769	9.47755	9.81111	8.21613	10.1465	8.85559	10.038	17.4912	14.8947	15.1809	9.09485	10.3797	9.2393	8.13971	8.03779	11.1887	10.8781	9.03467	8.84909
8q22.2	NM_006281	6788	STK3	serine/threonine kinase 3	1.13807	0.18659	0.000125226	0.00192232	2.41499	3.91435	5.32915	5.43857	6.77419	7.36878	2.62333	3.88519	5.16019	5.0289	4.32593	1.73207	2.54955	1.8396	7.03952	7.59984	2.23523	6.17606	8.38077	7.16191	3.0019	3.36619	10.3462	3.08185	3.56962	2.14048	6.46854	4.57381	7.22707	1.78488	1.21067	1.41917	5.53894	7.14313	6.15508	3.19169	2.65644	4.39678	6.09279	5.67678	4.97857
2p13.3	NM_022173	7072	TIA1	TIA1 cytotoxic granule-associated RNA binding protein	0.724538	-0.464867	0.000125117	0.00192232	1.98159	5.10636	6.02075	5.76218	6.016	7.63061	1.80069	6.56251	4.02931	12.443	3.3139	4.96726	5.38037	2.87054	9.1247	8.37595	4.64293	5.67883	6.68412	5.27151	3.32387	7.40872	6.34896	6.47188	5.48681	4.63911	12.7201	12.2608	12.4253	8.17827	6.48774	7.42889	5.38984	10.2189	9.19437	11.1532	7.77996	10.9334	11.8852	9.81207	9.41661
3p21.1	NM_014366	26354	GNL3	guanine nucleotide binding protein-like 3 (nucleolar)	1.14157	0.191025	0.000125995	0.00193115	7.33957	22.6093	27.3243	22.2274	29.605	26.2031	5.65659	37.3314	28.7659	29.8995	19.2906	15.7513	28.6922	7.27016	34.8147	29.2507	18.8826	31.0041	35.4064	29.671	25.9787	38.0393	32.1855	35.3895	37.5981	29.5946	29.5913	26.4521	29.4851	18.3687	14.2909	14.4175	14.499	16.2794	14.0952	10.9378	9.30016	12.2463	25.2296	22.8944	20.928
19q13.42	NM_001130072	29924	EPN1	epsin 1	1.20688	0.271283	0.000126694	0.00193592	25.3111	26.8333	24.5148	26.1681	15.7093	14.9867	26.4745	19.8192	29.5249	13.7935	23.6716	15.4558	11.3472	20.093	19.7708	17.1403	17.2328	25.0764	16.5479	25.8605	22.785	8.1397	24.6523	11.189	12.2845	12.738	11.4216	11.846	10.4054	8.1623	7.2963	10.5818	14.9146	11.1214	15.1435	12.6123	10.514	7.53671	13.7454	15.6623	18.7977
15q15.1	NM_001114633	100137049	PLA2G4B	phospholipase A2, group IVB (cytosolic)	0.748143	-0.418615	0.000126676	0.00193592	1.68619	0.645201	0.001028	1.24411	0.491807	1.81047	2.35088	0.033076	1.9013	2.80808	1.20515	2.84827	3.60289	2.83345	3.37444	3.06062	3.2414	0.860748	1.28294	0.875257	1.83143	1.47984	0.933724	2.00436	0.980602	1.36204	1.07205	2.5746	1.38228	2.95399	4.2694	3.48021	3.77799	3.3386	2.2929	5.35404	1.39763	3.39063	3.55198	2.36231	3.59315
16p12.2	NM_005030	5347	PLK1	polo-like kinase 1	1.19872	0.261492	0.000126921	0.00193642	7.87877	7.84382	13.3177	8.70616	7.29137	6.77027	4.82198	22.7855	12.0365	11.2191	10.0475	4.81629	5.11848	8.38919	14.6033	13.7524	8.20391	19.1817	25.0445	26.471	5.42412	1.95531	5.09638	6.61047	7.45249	5.2769	13.6475	15.3888	9.45096	2.73912	2.23355	2.7659	7.76979	7.33489	7.86955	8.18833	6.83687	5.86686	5.70345	7.86436	7.65626
Xq22.2	NM_016370	51209	RAB9B	RAB9B, member RAS oncogene family	0.736262	-0.441708	0.000127148	0.00193692	1.17395	1.21666	0.580301	0.768126	0.990438	1.43774	1.06885	0.872231	0.255023	3.03489	0.384256	2.86389	3.46987	0.562691	0.843954	0.989939	2.69728	0.540767	0.519344	0.521143	3.45662	6.59639	0.242604	3.20408	3.42351	3.27703	1.3617	2.15214	1.48788	11.5262	11.1532	10.1616	1.3661	1.15625	1.02976	1.97404	1.77723	2.41815	1.83704	1.50972	1.46915
2p11.2	NR_110236	101928371	AC104134.2	uncharacterized LOC101928371	1.33374	0.415473	0.000127743	0.00194302	1.01507	3.09657	2.88336	1.99071	4.7316	3.56886	1.61959	5.53038	2.7423	5.52161	1.95772	2.07701	3.53046	1.34421	4.72126	4.82648	2.58295	4.11038	4.50352	3.67391	4.06119	5.09369	3.9016	2.92854	2.96896	2.08099	3.64297	3.38416	4.49665	3.71546	3.05006	3.31553	2.61182	3.78326	2.91014	2.6277	1.60511	2.65972	3.6634	2.47224	2.27374
11q22.3	NM_017515	54733	SLC35F2	solute carrier family 35, member F2	1.79748	0.845976	0.000128208	0.00194713	0.418809	1.60289	23.1853	13.8162	5.57825	4.89911	1.55038	0.543971	7.65731	0.842508	4.88392	1.68188	2.38658	0.295696	8.44604	12.4181	1.91594	9.40663	9.75404	8.5555	1.10915	1.75175	28.9236	3.13797	4.83465	3.64646	3.00386	1.21537	2.57398	1.3809	1.41721	1.06188	4.93223	4.3579	4.82765	1.36645	1.07415	1.28619	3.10727	2.89406	2.13203
9q31.2	NM_018112	55151	TMEM38B	transmembrane protein 38B	0.699737	-0.515116	0.000128767	0.00195264	3.02243	4.02025	3.66317	4.64109	3.29074	3.93118	1.7864	3.35884	2.50731	4.28215	1.49318	1.99566	2.52575	2.27613	3.41997	4.96948	1.90124	4.94378	3.49099	2.64918	2.79659	6.49908	4.52386	4.73345	5.40012	4.90349	5.5376	8.82036	5.41653	3.23745	2.96367	2.80531	5.93934	5.66996	7.82259	5.44549	6.67229	6.32918	5.01817	5.13163	4.94112
3q22.3	NM_001085049	22808	MRAS	muscle RAS oncogene homolog	0.829886	-0.269015	0.000129606	0.00196238	2.02738	3.41778	2.56826	2.75269	5.05153	5.72908	4.41628	1.62496	3.48547	3.34032	1.35017	5.05607	4.91663	1.5722	4.1204	5.07736	3.80897	3.22247	2.44348	2.14125	4.86593	4.91828	3.65248	2.9269	3.82408	2.64165	4.42259	4.88952	3.62766	10.5429	10.8447	9.66089	7.10744	5.92364	6.83751	5.51511	3.48579	4.43647	5.71396	4.71619	3.96772
1q41	NM_001297754	55105	GPATCH2	G patch domain-containing protein 2 isoform 2	0.721723	-0.470483	0.000130041	0.00196531	1.1032	2.48834	2.40357	1.90088	3.16476	4.45418	0.89462	3.51476	2.76204	5.42293	1.3742	2.37362	4.94273	0.895315	3.73122	4.15415	3.17922	3.18356	3.78762	2.97599	2.97362	4.51527	2.38594	7.65728	6.64975	4.76683	5.66381	3.76363	5.57908	4.72853	4.19555	4.19331	5.01987	5.30835	6.10347	3.59895	2.38159	4.93825	3.96476	3.82227	4.41971
8p21.3	NM_001018003	10174	SORBS3	sorbin and SH3 domain containing 3	1.23644	0.306193	0.000130194	0.00196531	14.1846	27.8467	38.5907	26.1082	20.5799	15.0363	17.6741	13.7192	43.8344	10.2563	28.9704	8.00149	6.69955	10.9872	33.217	29.7598	7.34058	25.9685	16.4977	23.2518	9.72393	2.22444	34.6192	15.1908	16.4882	12.9134	14.4467	14.4708	10.8451	2.54993	2.61617	2.62919	14.5661	12.6285	17.6639	11.3301	6.82812	8.18872	20.5637	19.8425	22.5896
2q13	NM_022662	64682	ANAPC1	anaphase promoting complex subunit 1	1.19407	0.25589	0.000131803	0.00198661	2.21848	4.34553	5.65683	5.30863	5.12	5.54093	3.26484	6.51598	4.57121	7.4214	3.31767	4.18342	6.6699	2.20477	6.70686	8.30111	5.55697	7.21994	8.34833	5.79073	4.31546	6.38636	8.80255	3.72629	5.17594	3.9325	5.77628	6.35346	7.36207	5.2511	5.15065	5.2535	3.85348	4.62537	3.95358	4.33355	2.94376	4.26908	5.49942	4.8654	4.86799
10p12.2	NM_005180	648	BMI1	BMI1 polycomb ring finger oncogene	0.805951	-0.311236	0.000132519	0.00199033	2.29158	8.33878	5.26034	5.47437	6.99281	9.77762	3.78226	5.4779	4.27473	8.74653	4.96508	7.35012	8.54866	2.04159	6.7946	8.64466	7.44651	5.81406	7.7523	6.28798	4.69691	6.27122	6.88995	9.35259	10.2901	7.82439	10.208	7.94404	8.93978	13.3664	13.8468	10.6503	6.81556	9.63533	9.9738	8.13754	8.21947	9.75013	12.3288	8.79105	10.2371
16p13.11	NM_033201	89927	C16orf45	chromosome 16 open reading frame 45	0.788399	-0.343003	0.000132449	0.00199033	25.2958	17.7779	11.1507	8.58716	13.0928	14.2611	32.1962	17.4186	9.18976	25.4419	7.18004	28.1764	37.6736	29.1717	12.581	12.1439	30.8464	13.8972	11.4273	8.50608	26.579	22.8686	2.95178	23.3347	24.774	29.2045	12.9221	24.233	17.1154	45.9627	43.1412	44.5677	35.1837	27.0561	30.0321	27.4936	31.3303	26.4464	14.2466	15.9629	16.8387
19p13.3	NM_005483	10036	CHAF1A	chromatin assembly factor 1, subunit A (p150)	1.36126	0.444946	0.000132736	0.00199033	2.90432	3.20507	7.38168	4.80311	3.37572	3.60362	2.74442	4.63042	5.03685	6.78525	3.21622	2.62799	4.34288	4.50232	6.68604	7.75777	3.62418	8.12364	9.052	8.33629	2.37763	1.1278	2.75107	4.84532	6.10127	4.48446	4.73963	7.14747	5.0257	2.23064	2.1829	1.86929	4.20847	4.20522	3.60485	3.31239	3.02792	2.22992	3.82427	3.19564	3.32456
1p36.33	NM_001110781	728661	SLC35E2B	solute carrier family 35, member E2B	0.862165	-0.213964	0.000132848	0.00199033	11.8501	18.7631	10.6222	11.2188	11.1909	12.2293	19.601	4.25547	13.7736	6.94226	14.5664	10.785	12.2124	5.25737	12.6191	12.111	15.6609	12.6257	5.63919	6.80687	10.4504	7.57206	9.95617	11.3794	12.3684	11.5691	10.5678	11.3392	12.1987	17.7963	18.5397	20.2579	15.4078	14.4678	14.818	15.0669	12.2725	11.7074	12.7361	12.7293	13.1203
21q22.2	NM_001007246	54014	BRWD1	bromodomain and WD repeat domain containing 1	0.733097	-0.447925	0.000134154	0.00200688	5.63739	5.27494	5.65679	5.451	5.05311	7.03798	5.7844	7.66507	2.41415	17.5107	1.98619	19.4256	19.0366	5.80164	5.89773	7.05226	12.8047	5.72205	3.91992	2.8079	8.14973	14.159	4.91395	13.355	12.0963	13.9959	5.8917	13.9394	7.89858	22.0995	21.829	19.0387	5.6292	6.38488	6.06898	14.1295	17.5452	15.1715	8.93818	9.08553	9.11741
1q32.1	NM_002871	5877	RABIF	RAB interacting factor	0.990865	-0.0132402	0.000134803	0.00201357	2.85434	2.21772	2.61818	2.70661	2.47522	2.67122	2.41895	1.96873	2.33245	2.43612	1.91144	2.32052	1.93413	1.74125	2.18872	2.71641	2.5937	1.80977	2.23289	1.8255	2.64884	3.69437	2.73534	2.57441	3.22577	2.60639	2.89467	3.29881	2.54655	5.20904	4.43066	4.53733	2.409	2.26249	2.2185	2.68212	3.16262	2.42896	2.31684	2.74487	2.71637
22q13.31	NM_032287	84247	LDOC1L	leucine zipper, down-regulated in cancer 1-like	0.887054	-0.172905	0.000135552	0.00201611	15.0668	16.158	15.1327	9.62789	13.2696	14.4826	17.1774	8.45279	13.8545	18.3933	10.5035	12.9816	20.7865	13.4521	15.4383	16.4058	18.5839	12.404	9.01754	8.72433	16.0656	7.88321	12.204	19.1933	20.84	21.2258	13.6294	17.0387	13.767	20.8304	21.693	22.3199	14.6923	12.4964	13.5265	16.2338	15.7064	14.1798	15.9084	14.5823	16.1545
5q33.3	NM_004219	9232	PTTG1	pituitary tumor-transforming 1	1.09041	0.124877	0.000135579	0.00201611	41.8807	28.8666	62.7196	66.4657	41.3927	34.8001	22.2231	145.199	49.7142	49.3627	39.5456	30.6652	35.9196	70.9407	56.4123	56.98	35.0232	87.2657	125.316	84.1874	26.5044	53.4542	13.7821	45.6649	46.0345	36.895	51.3851	90.6146	56.0252	11.9011	10.6214	8.35797	37.851	32.8154	41.7491	33.7944	46.2028	30.147	28.431	35.1263	34.8268
15q22.31	NM_017858	54962	TIPIN	TIMELESS interacting protein	1.4531	0.539137	0.000135292	0.00201611	1.84703	2.90702	3.50524	4.83154	2.66598	3.05821	1.65313	4.18144	1.994	4.1851	2.40906	1.2581	3.39758	1.82319	5.34835	5.63708	3.20984	3.68925	3.92423	2.86718	3.22545	5.19013	2.19682	3.75335	4.24196	3.12165	4.16249	3.90807	4.29508	2.82929	1.50821	2.23013	1.10728	0.741368	1.44471	2.32671	1.97483	2.45889	3.88975	3.12465	3.74939
11q13.4	NM_001258392	81570	CLPB	ClpB caseinolytic peptidase B homolog (E. coli)	0.89994	-0.1521	0.000136201	0.00202234	7.35346	6.54764	6.22368	2.56161	6.2395	7.23823	8.37064	6.53349	5.85752	7.0402	3.52038	4.32713	8.41102	7.0849	6.21282	7.24032	7.14167	7.26186	7.60077	7.01279	7.7969	4.30683	6.59657	6.43716	8.12827	7.6608	6.3963	8.76966	5.73435	13.8995	13.5959	15.6324	6.62748	5.82151	5.82299	9.98991	8.61782	7.34222	5.43113	5.05554	4.91654
Xp22.11	NM_024122	79135	APOO	apolipoprotein O	0.746714	-0.421373	0.000136964	0.00202764	6.43312	4.51313	5.83604	6.38461	5.5403	5.44677	5.72215	5.48425	5.04359	5.97758	4.15364	4.67489	6.16203	4.72224	7.35689	8.80953	5.26541	6.62064	6.56132	3.86252	11.5607	22.9128	3.55763	13.7811	14.7201	11.1974	7.4028	6.81161	6.63072	22.93	20.2909	18.8378	5.10438	5.48273	5.19213	4.2601	5.7629	6.31198	6.77476	6.45348	6.44012
10q22.1	NM_012339	23555	TSPAN15	tetraspanin 15	1.2582	0.331358	0.000136869	0.00202764	19.4784	8.96267	22.147	23.0583	12.6338	10.7533	8.73841	9.34836	15.677	6.43248	17.7577	5.37771	6.39732	11.5501	22.1159	21.4214	5.62677	20.826	14.5933	14.3698	8.8081	5.54465	23.2801	18.3106	16.6006	15.3937	9.56953	11.6568	12.5587	3.01463	2.88797	2.52427	13.0179	11.3842	15.4934	5.79559	6.66071	4.83759	9.49671	12.4437	13.9228
12p11.23	NM_001171888	26127	FGFR1OP2	FGFR1 oncogene partner 2	1.4964	0.581495	0.000137648	0.00203475	1.73657	4.81601	5.04257	6.28247	7.68037	6.22523	3.30473	8.04871	8.30959	4.3455	6.32195	1.55054	3.9754	2.10262	6.55419	6.95194	2.70655	8.40673	5.55266	4.40302	3.92129	3.86016	9.08703	4.1041	2.88407	2.64249	11.692	4.18009	5.11744	3.20993	2.42586	2.18536	5.29975	8.09164	9.58197	1.56447	0.636873	1.9942	8.05173	5.71277	5.62034
16p13.3	NM_001089	21	ABCA3	ATP-binding cassette, sub-family A (ABC1), member 3	0.74622	-0.422327	0.000138648	0.002042	16.3293	8.81235	3.97493	3.63397	3.54855	4.36216	18.6818	4.26629	4.10994	9.5984	2.73049	10.4201	11.9855	8.92407	5.22866	4.6904	13.2205	5.38637	3.75602	4.47624	14.3728	2.93218	1.89975	6.73742	6.79489	7.48536	3.6462	6.82071	3.58109	17.0825	16.6922	18.5793	6.29122	4.978	5.7419	12.6038	12.3872	10.5317	6.7652	8.1877	9.65042
1q22	NM_004632	7818	DAP3	death associated protein 3	1.13847	0.187091	0.000138663	0.002042	5.80622	13.8534	12.471	9.99324	16.5552	14.2305	5.881	13.9469	13.8514	12.4016	9.20404	7.43707	9.37289	4.2435	14.9903	13.2544	9.92673	15.1718	12.1817	9.30167	15.344	16.3923	18.9727	15.1202	11.0414	10.5579	11.7123	12.2736	11.1818	12.3663	7.39027	8.31917	9.10217	7.76196	6.0878	4.83357	7.18803	7.92274	11.3135	9.56662	10.1325
2p22.1	NM_001167959	130733	TMEM178A	transmembrane protein 178A	0.584757	-0.77409	0.000138753	0.002042	2.0949	0.841867	1.81245	0.921177	0.544795	1.22526	0.757337	0.000253	3.3e-05	3.38619	5.1e-05	2.70365	1.31601	0.938662	4.14179	2.17481	1.56869	1.83455	0.592598	1.87332	0.000106	3.47164	0.023751	4.02154	2.82362	2.97075	0.926965	5.48775	2.89614	2.64743	2.97057	1.63091	1.55665	2.84957	0.794618	3.23918	3.70252	3.44081	3.97907	3.58225	2.70904
12q24.31	NR_038854	100506668	DYNLL1-AS1	DYNLL1 antisense RNA 1	0.711777	-0.490503	0.00013992	0.00205528	4.67732	5.65612	2.47752	1.13412	3.36378	4.16747	8.26034	1.05809	4.33114	2.09011	3.57827	1.13893	2.12969	2.6616	3.94436	2.63693	2.13253	2.3832	1.76411	1.92671	3.5195	4.33002	2.58786	3.35533	2.59196	2.52238	4.95993	3.05928	6.25045	3.61835	4.17954	4.52963	2.54515	3.50761	4.02064	3.73468	2.86186	2.53155	7.89676	5.79686	7.56082
15q15.3	NM_002373	4130	MAP1A	microtubule-associated protein 1A	0.838299	-0.254463	0.000140067	0.00205528	9.09726	9.92976	5.91404	2.16805	6.87517	8.85654	16.6445	3.13292	9.36966	10.9284	5.6014	5.31636	14.9732	5.64182	7.19834	6.876	13.6588	6.70458	4.52119	5.26362	13.1733	4.32289	10.5508	6.98304	8.24577	7.68356	6.56252	7.69375	6.09049	16.7915	17.7868	19.62	13.5119	12.2033	12.3767	13.6497	8.48181	9.41612	6.91929	8.22016	8.52669
15q21.2	NM_014548	29767	TMOD2	tropomodulin 2 (neuronal)	0.67497	-0.567106	0.000140426	0.00205752	2.79368	3.05387	1.81908	1.18534	3.01367	4.70468	4.58532	1.57951	2.50359	13.107	1.7258	13.8629	27.0587	2.02886	2.35161	3.10126	23.4926	2.18265	1.65993	1.3789	5.17269	6.90816	1.3521	10.7715	10.9798	10.4464	4.37149	6.10375	5.47629	21.2287	23.5302	22.8694	5.53812	5.75126	4.60325	6.49771	4.75543	8.0959	6.20176	4.66051	6.03768
11q23.3	NM_001655	372	ARCN1	archain 1	1.05073	0.0713885	0.000141762	0.00207404	12.8256	35.7754	40.3737	27.5397	49.2862	51.472	18.4314	37.719	46.7765	31.2794	31.8856	12.6233	23.3486	7.10408	53.0448	51.0359	20.1975	43.8202	42.6485	38.4028	26.8623	29.5032	74.9721	29.9803	31.4239	20.806	45.8386	31.2514	42.3507	17.5328	17.5424	19.5927	31.7541	31.1408	35.1127	17.7203	12.6313	23.3566	44.7692	36.9113	38.0865
4q12	NM_020722	57482	KIAA1211	KIAA1211	0.802897	-0.316713	0.000142097	0.0020759	4.64962	5.32506	4.88915	3.17523	5.11427	6.80158	7.33764	4.39779	3.29507	9.84974	2.21956	6.36594	9.63547	3.4771	4.1493	6.61321	9.91131	7.10185	6.3834	6.45283	4.98984	3.45247	4.33406	5.34171	7.14905	6.36527	4.88387	8.17637	4.54248	15.409	15.7398	15.9147	11.9871	10.9856	11.3176	10.2972	9.34054	8.90498	7.66635	5.39474	5.49002
8q22.1	NM_177965	157657	C8orf37	chromosome 8 open reading frame 37	0.755825	-0.403875	0.00014242	0.00207758	1.19883	3.98731	1.62827	1.50936	1.46187	2.68733	2.01118	1.30611	1.6496	1.74737	1.33344	1.32459	1.42283	0.720304	2.11268	2.75643	1.42379	1.50898	1.3721	0.938502	1.69732	2.82807	1.168	1.33208	1.58031	1.42161	1.89847	2.31281	2.84214	2.70936	1.9572	1.97427	1.78371	2.27105	1.99195	2.68648	2.80614	3.34106	3.77221	3.51144	3.43362
11q13.4	NM_173582	283209	PGM2L1	phosphoglucomutase 2-like 1	0.679391	-0.557686	0.000143354	0.00208815	3.63709	3.8346	1.52118	1.66462	3.73923	6.73843	5.54822	3.83713	1.84801	13.5765	1.05533	12.6373	21.3683	2.03148	2.21862	3.4902	18.4418	2.75765	2.90164	2.28932	5.55597	10.5524	1.42768	5.14985	5.16453	4.66681	6.25109	9.69997	6.50525	18.565	19.6366	17.8393	3.1531	3.16037	2.77225	7.69184	8.80171	10.4788	7.17358	5.88094	7.05826
4q26	NM_172128	817	CAMK2D	calcium/calmodulin-dependent protein kinase II delta	0.802498	-0.317431	0.000144198	0.00209739	3.11537	7.39864	6.46033	4.49431	3.4971	6.22962	3.67699	2.39307	2.82858	6.82439	2.29446	4.67962	5.35049	1.52946	5.5943	6.87502	5.35636	4.70816	2.87132	2.99773	2.12799	5.1667	10.1465	5.54847	5.3331	3.58201	6.20611	6.37286	6.69902	6.34341	6.34358	6.53226	4.25217	4.3712	5.19911	6.51265	6.16164	7.25366	7.78372	6.14853	5.75498
18q	NM_001080467	4645	MYO5B	myosin VB	2.03772	1.02695	0.000145483	0.00211174	0.471354	2.25678	5.66854	2.05492	3.42545	3.2149	1.15774	0.120515	3.74157	5.49978	2.19933	8.9745	17.094	1.57533	3.08786	4.25644	16.3561	2.97619	3.18406	3.43466	0.523708	0.443211	19.6635	6.08352	6.82789	6.77289	1.86023	0.943829	1.6657	0.841018	1.005	0.832661	1.74044	2.06017	1.94199	1.21323	0.751076	1.08463	1.82211	1.79356	1.25248
1q23.3	NM_007122	7391	USF1	upstream transcription factor 1	0.910334	-0.135531	0.000145608	0.00211174	17.9989	14.232	10.7296	7.61699	13.7208	13.758	17.1072	14.3768	13.5638	15.7438	11.9762	13.1104	21.6416	19.3041	17.0272	15.0655	16.5225	9.65268	16.8509	11.1011	19.2608	13.7449	14.2252	11.5687	15.4299	18.7421	14.5031	17.9781	12.9042	19.4176	22.6383	21.8297	14.9239	12.2295	14.8226	17.9707	19.1126	16.1871	15.041	18.7822	15.9032
4q24	NM_001008388	493856	CISD2	CDGSH iron sulfur domain 2	0.856934	-0.222744	0.000146358	0.00211954	3.6659	4.10807	4.28941	4.14794	3.97869	3.9395	3.02892	5.75809	2.5021	4.97123	2.02638	2.89579	3.45736	3.41133	3.61501	4.73974	2.89559	3.43562	3.98764	3.32917	2.75948	5.65494	3.33583	5.74345	5.02332	5.31084	4.35921	5.61662	4.3026	5.41294	4.54898	4.35865	4.38468	4.38823	4.47473	3.39667	5.3741	3.83935	4.50728	4.393	4.48518
20p13	NM_014723	9751	SNPH	syntaphilin	0.84824	-0.237456	0.000147428	0.00213194	5.18645	3.62909	0.893237	0.927216	1.50531	2.1262	6.33928	1.27165	1.78447	3.5185	2.08154	4.04005	4.70676	4.7438	1.40386	1.56789	5.55972	1.42534	0.635627	0.464118	6.74933	2.71442	0.988883	2.8091	3.51917	4.23738	1.18242	2.81479	1.62705	7.52832	7.42167	8.34119	2.21367	1.60163	2.12229	3.61939	4.0015	3.55624	1.66291	1.9096	2.51371
15q23	NM_001004439	22801	ITGA11	integrin, alpha 11	1.64879	0.721409	0.000147862	0.00213512	1.632	15.384	11.3299	3.89245	5.89709	4.27826	8.63093	0.042258	6.70533	0.690325	4.15021	0.605649	1.18989	0.449957	5.56861	5.49384	1.0264	3.87132	1.05611	1.19231	1.51563	0.647594	6.99174	2.14596	2.90378	1.59554	1.81866	1.2144	1.55794	0.312783	0.271957	0.180159	4.12889	4.08859	4.64745	1.5293	0.769607	1.39148	2.70623	3.03686	2.64514
12q24.13	NM_001109662	283450	HECTD4	HECT domain containing E3 ubiquitin protein ligase 4	0.841079	-0.249687	0.000149209	0.00213603	6.1281	6.98561	3.5466	2.24731	3.43632	4.98504	11.2863	5.23332	4.91426	7.50232	2.8291	5.51194	9.51071	3.57551	4.3044	4.81839	14.3204	5.26453	5.16843	5.21733	6.11806	3.57808	4.55622	4.72593	6.06248	5.48039	5.76036	4.77959	4.53762	8.81853	9.51223	9.52072	7.49368	7.05701	5.93373	10.9892	7.0521	7.90307	4.77055	5.395	5.86405
3p21.2	NM_006010	7873	MANF	mesencephalic astrocyte-derived neurotrophic factor	1.05509	0.0773603	0.000148551	0.00213603	17.8838	45.6062	55.3653	52.0002	46.2116	42.1205	20.3579	35.3859	42.3161	25.9798	32.648	15.3644	17.1225	14.185	47.647	54.2958	14.0043	42.1331	32.3256	30.5768	33.1129	48.4546	42.9212	26.6271	31.889	21.8762	45.1589	41.3011	41.0356	21.4415	17.3384	17.271	23.5084	23.4759	25.835	14.9248	23.8701	19.1055	33.4319	28.4634	27.3317
17q25	NM_024844	79902	NUP85	nucleoporin 85kDa	1.13003	0.176361	0.00014895	0.00213603	3.83872	6.7184	8.82104	8.40726	7.2642	7.34744	4.99503	6.68157	8.10234	7.89841	5.33922	5.72445	7.46729	4.62344	9.54956	10.4955	6.3721	9.752	8.888	8.15561	7.47167	8.30306	8.3232	8.00453	9.93269	6.857	8.68245	10.0464	8.61507	6.56509	7.8072	6.29461	6.3013	6.2612	6.10159	5.44275	5.53008	4.6585	7.80935	6.39988	6.57119
1q23.2	NM_145167	93183	PIGM	phosphatidylinositol glycan anchor biosynthesis, class M	0.856951	-0.222716	0.00014835	0.00213603	1.04325	2.165	2.58183	1.92627	1.97992	2.16615	1.75424	0.812086	1.94408	2.79949	1.38747	1.84456	2.15781	0.770943	2.18172	2.99316	2.04823	1.82406	1.30582	1.05684	1.25726	1.48216	3.07514	2.78381	3.87363	3.10871	3.13299	2.67847	2.78252	2.36047	2.5249	2.21052	3.20712	3.2584	3.90104	2.37328	2.22647	2.31177	2.75988	2.44297	2.23062
3p22.2	NM_006225	5333	PLCD1	phospholipase C, delta 1	1.32306	0.403881	0.000149135	0.00213603	9.41578	15.4622	8.73609	8.18845	6.83455	5.23155	8.6079	23.426	10.3233	5.42184	4.83693	4.18909	4.36743	6.67974	10.4813	7.97062	4.34457	13.0776	11.6131	13.8712	10.0149	3.81221	15.3932	3.58135	4.48565	3.75276	4.40092	6.34227	4.50033	2.62697	2.95114	2.57275	7.28251	4.87085	6.56264	5.62862	4.9552	6.39331	6.88861	7.95522	8.38526
3q29	NM_152773	255758	TCTEX1D2	Tctex1 domain containing 2	0.810204	-0.303643	0.000148774	0.00213603	15.1201	21.5812	12.0257	15.9789	13.8318	8.79835	15.4868	20.6956	8.97574	18.6707	9.35335	16.3965	19.1423	22.9449	20.42	16.8205	14.8634	9.39265	8.84388	8.10286	12.5531	18.016	9.72672	20.586	22.0018	19.9142	11.1	23.5128	20.8592	23.9506	22.1029	21.9859	10.0028	8.31813	8.44038	13.9384	26.3681	15.8877	18.4086	18.1815	20.3454
Xq23	NM_020871	57631	LRCH2	leucine-rich repeats and calponin homology (CH) domain containing 2	0.6074	-0.71928	0.0001496	0.00213855	1.77576	2.10096	1.43169	1.31049	2.07064	3.20684	0.442737	2.1828	1.01225	5.07453	1.50315	2.12159	2.49884	0.558574	2.13631	2.35892	2.93823	2.25729	2.29206	2.4149	1.55993	3.63635	2.31243	6.0741	3.46615	3.57552	3.88719	3.67248	3.74156	5.76152	4.88235	3.19088	3.82589	4.69344	5.13082	1.87231	2.11176	3.65051	3.14557	2.93196	2.92036
13q34	NM_145735	8874	ARHGEF7	Rho guanine nucleotide exchange factor (GEF) 7	0.702349	-0.50974	0.000150602	0.0021498	2.36345	1.33426	1.41002	0.810432	2.47319	4.31438	3.29242	1.69257	0.563024	6.11042	0.411901	5.41204	10.1545	1.69808	1.90669	2.00973	8.38534	1.73597	1.55907	2.18835	4.52929	4.84223	0.524747	4.67078	5.65166	5.92546	2.79343	3.82791	2.39771	15.9972	16.9302	15.2672	3.35947	2.15607	2.44262	6.21339	4.72286	5.7779	3.99554	3.17675	3.29483
6p22.2	NM_003525	8346	HIST1H2BI	histone cluster 1, H2bi	1.06402	0.0895316	0.000151082	0.00215049	225.699	143.824	218.456	248.689	167.112	151.899	107.982	239.658	284.096	89.4723	272.867	59.3071	78.6578	211.128	217.038	180.31	52.8056	225.649	153.677	138.266	133.721	145.027	46.7786	102.505	129.037	80.4321	200.157	224.01	168.916	38.5457	33.8727	33.1986	122.747	112.701	108.567	97.2385	132.643	71.9613	107.686	136.629	155.667
6q14.3	NM_006372	10492	SYNCRIP	synaptotagmin binding, cytoplasmic RNA interacting protein	1.29654	0.374669	0.000150933	0.00215049	2.09401	5.06147	5.22837	4.17354	6.75089	8.06386	4.28755	9.0063	9.0055	6.33935	6.29933	2.56702	4.99259	2.09533	8.97316	6.92508	5.16293	9.56399	12.7944	11.4446	5.18828	6.91822	10.8147	6.44976	7.04551	3.79896	8.81122	5.49359	7.96182	5.1965	5.3568	5.15061	5.77382	4.08356	5.22614	4.22791	2.83849	3.92366	7.56539	4.91	6.1526
15q26.1	NR_120372	101926895	LOC101926895	n/a	0.829383	-0.26989	0.000152617	0.00216309	3.26225	1.13447	0.548836	0.989426	1.54202	2.40478	2.16877	1.83581	1.0463	1.48874	0.362101	1.76586	2.747	3.75516	0.863685	1.21894	1.45454	1.83164	1.88844	1.36012	2.68111	3.64965	1.65395	1.04401	1.6966	2.32546	2.77784	3.11625	1.81162	4.019	3.48391	4.33103	2.66268	3.46017	3.87734	2.46	2.50639	3.07734	1.07236	1.55284	2.1846
20q13.2	NM_020436	57167	SALL4	spalt-like transcription factor 4	1.93775	0.954384	0.000152556	0.00216309	0.842762	0.594733	8.1602	6.25656	1.20023	1.13769	0.414017	10.84	1.59476	3.9089	0.624139	0.375297	0.605802	2.22275	4.76975	6.29958	0.578475	15.073	25.9593	18.5868	0.703168	0.641204	4.02876	1.02121	1.84249	0.896976	1.68753	1.35857	1.64819	0.429782	0.277817	0.488179	3.30283	2.46449	2.60183	1.09797	0.785693	0.547083	0.722902	0.597904	1.03289
20p11.23	NM_152227	27131	SNX5	sorting nexin 5	1.36261	0.446374	0.000152494	0.00216309	5.29073	7.09132	14.6707	21.2622	13.6543	10.8418	4.57616	3.79398	8.32407	8.01016	9.06035	6.80402	7.11615	1.52754	12.8187	10.9716	7.36058	14.5138	2.55089	3.95129	6.26416	13.3907	19.112	6.90504	10.4996	6.53874	4.65874	9.97314	8.38824	3.80937	4.69599	3.1267	8.54294	5.34943	4.78535	5.6514	1.91861	3.1182	12.9309	9.86482	10.1122
9q33.3	NM_014636	9649	RALGPS1	Ral GEF with PH domain and SH3 binding motif 1	0.770704	-0.37575	0.000153821	0.00217706	2.68698	3.15287	1.69347	1.39574	2.66932	3.04715	5.19163	2.50859	0.730323	5.44841	0.936133	6.56466	8.04873	2.16006	2.41643	2.93808	9.78881	2.161	1.61374	1.50281	5.272	3.98855	1.2845	3.99224	4.31472	4.67713	2.19534	3.37877	2.64118	11.2376	12.6955	13.0118	2.28232	2.13658	2.25063	6.67374	5.26737	6.85977	3.21542	3.09514	3.37627
13q13.3	NM_004734	9201	DCLK1	doublecortin-like kinase 1	0.638667	-0.646865	0.000154497	0.00218044	3.73505	5.06726	1.0197	1.38636	5.13177	7.75272	7.92828	3.90951	2.07772	12.0996	1.34171	9.68792	20.5798	1.76221	2.08343	3.17662	20.3898	2.61462	2.60718	2.11645	8.58601	7.01427	0.424465	7.8828	9.77043	8.53825	5.06417	6.52646	4.20007	27.2796	27.7473	26.2693	4.34223	3.70024	3.14693	10.7065	8.62166	11.1428	7.21321	6.01506	6.98548
Xq13.1	NM_018977	54413	NLGN3	neuroligin 3	0.802341	-0.317712	0.000154431	0.00218044	4.47419	6.14269	1.30061	0.587964	1.53442	1.79685	6.62679	1.70567	0.795147	2.9232	1.19198	3.74883	4.48934	3.51088	1.83468	2.41366	4.15282	2.64606	1.28122	0.989793	5.09924	2.2655	0.229805	2.42548	1.78394	1.93623	2.50986	2.37753	2.97747	6.06976	8.82343	8.86437	1.13706	1.18984	2.91758	5.31492	4.90907	4.70978	2.82203	2.08285	4.20366
12q24.31	NM_000017	35	ACADS	acyl-CoA dehydrogenase, C-2 to C-3 short chain	1.54843	0.630807	0.000155135	0.00218327	9.24963	4.87656	10.0293	11.0983	6.41333	4.96708	7.69504	7.12583	8.50498	2.25986	7.79486	2.58337	2.43547	4.6716	9.89117	7.55347	2.11016	6.71802	5.91309	5.51262	5.47402	3.45488	10.5557	4.43273	4.07667	3.46324	2.16631	5.02019	4.33958	0.604427	0.83711	0.798016	4.8097	4.28864	4.90054	2.56059	2.19074	2.16549	4.48184	5.21138	6.74938
16p13.12	NM_016561	51283	BFAR	bifunctional apoptosis regulator	1.06142	0.0859903	0.000154934	0.00218327	6.31597	11.8529	17.5837	18.3289	16.8006	16.3929	7.24221	10.5408	13.3215	11.3423	10.6979	7.09966	11.288	5.32511	17.7099	21.4528	9.08084	18.7632	17.062	13.1716	10.0353	13.7368	20.6525	10.3148	13.0912	10.2334	15.6064	13.4818	15.3396	10.3031	10.6476	8.86927	12.4309	12.4855	13.7216	8.98174	10.5457	10.2135	15.0807	11.9857	12.849
19p13.2	NM_001080429	57662	CAMSAP3	calmodulin regulated spectrin-associated protein family, member 3	0.74692	-0.420975	0.000156885	0.00220479	6.51339	2.56335	0.77094	1.17163	2.14544	2.40556	10.2579	2.99693	0.655798	4.85433	1.46138	8.58932	7.55148	5.03437	0.897787	1.80959	10.7733	1.19755	1.00456	3.91862	6.97717	2.18471	1.58159	4.25194	4.13091	5.28511	1.9673	2.04808	1.64727	7.8815	7.77774	10.0298	3.21777	2.42514	3.29589	6.27478	4.18645	5.18873	2.76457	3.10578	4.39403
8q11.21	NM_182746	4173	MCM4	minichromosome maintenance complex component 4	1.17494	0.232592	0.000157969	0.0022169	5.99371	9.93456	13.5052	16.7967	14.3384	15.2202	7.8564	11.1078	11.6678	20.4105	10.3681	8.30847	13.1307	7.5127	20.187	21.5145	10.6275	21.1107	22.654	16.3516	9.76893	9.0465	11.349	13.6334	18.4709	11.4012	18.33	19.3236	17.6067	11.6509	10.8234	10.7481	9.31617	8.20727	7.45467	9.94069	9.67982	8.27122	12.7513	11.6626	11.1194
10q21.1	NM_018464	55847	CISD1	CDGSH iron sulfur domain 1	0.83564	-0.259047	0.000158667	0.00222357	6.18402	5.04122	7.03101	7.12343	5.70503	6.98177	5.9857	5.61169	2.17015	8.80124	2.96039	7.33715	8.686	5.79796	5.64293	6.39796	6.21734	6.1612	6.21432	4.23292	5.99308	12.1573	4.80262	9.77156	9.32521	8.50585	5.8766	7.36311	7.12495	10.8777	10.0273	8.68378	6.77229	6.41522	6.75385	4.99543	8.48633	6.44171	7.14531	6.99976	6.56609
1q21.2	NM_003517	8338	HIST2H2AC	histone cluster 2, H2ac	1.06258	0.087578	0.000160246	0.00224254	610.508	470.84	420.292	522.678	394.731	290.616	380.895	737.981	489.605	331.247	535.041	208.875	212.295	941.843	365.543	325.075	188.89	576.533	447.625	481.281	377.872	341.097	139.705	276.046	241.251	246.408	348.064	375.592	333.796	146.807	110.273	171.408	217.75	173.51	186.918	191.504	306.459	160.685	199.313	266.635	321.428
3p25.3	NM_018462	55845	BRK1	BRICK1, SCAR/WAVE actin-nucleating complex subunit	0.957913	-0.0620333	0.000160532	0.00224334	51.2253	61.7093	59.8438	73.2806	57.3234	55.8395	44.9585	63.4774	51.78	51.0583	47.0282	45.6203	51.1029	41.9489	61.2605	66.2641	47.293	56.7748	48.1113	46.3386	54.4829	89.039	64.1871	67.1782	66.7902	58.5818	59.1462	79.3337	71.0153	57.147	49.0202	46.8058	57.6566	53.1942	57.5814	46.8493	56.2383	48.0617	63.5394	61.3864	64.7157
14q32.33	NM_001031714	64423	INF2	inverted formin, FH2 and WH2 domain containing	1.48612	0.571553	0.000160753	0.00224334	9.39813	9.8068	9.78287	7.93554	4.85687	4.33824	8.18755	3.29387	11.4362	3.8797	8.46686	4.54885	4.57863	4.36457	7.36195	6.00114	8.63928	10.5941	9.50456	11.5935	3.37707	2.00401	8.07526	4.57551	3.8885	4.15557	3.55537	3.20293	4.81776	1.19955	1.50806	1.36316	6.17349	5.89682	7.04874	3.6687	2.58271	2.4449	3.13706	4.71296	4.41548
16q13	NM_014685	9709	HERPUD1	homocysteine-inducible, endoplasmic reticulum stress-inducible, ubiquitin-like domain member 1	1.053	0.0745095	0.000161223	0.00224676	10.5441	29.4559	30.7585	31.3229	35.5844	32.1372	18.6291	34.9504	25.6957	25.3011	20.1606	13.2602	20.326	13.9526	30.8959	34.1675	17.7744	33.1058	20.6806	23.9989	20.8782	32.1289	32.889	18.5074	20.7871	21.9614	28.7254	35.2556	33.7519	18.0698	19.9819	18.0843	23.2674	22.6875	25.7757	14.262	15.4414	16.1039	28.4068	23.2507	25.0104
6q15	NM_016083	1268	CNR1	cannabinoid receptor 1 (brain)	0.662926	-0.59308	0.000161615	0.00224909	2.38591	0.622836	2.13127	1.10287	2.59314	5.3663	2.01853	1.51654	0.565085	9.765	0.677666	6.46434	8.95762	1.85014	1.20366	1.97314	9.29909	2.6292	0.618317	1.1075	6.29908	11.7693	1.21452	2.03862	4.37022	5.64849	3.82531	3.57246	2.72324	16.0806	17.1231	14.6065	2.23355	2.21757	2.97746	5.2638	7.3975	6.14087	1.59933	2.31733	2.58412
20p13	NM_005116	9962	SLC23A2	solute carrier family 23 (ascorbic acid transporter), member 2	0.720223	-0.473485	0.000162181	0.00225382	9.09332	8.25135	5.0535	3.58241	5.19405	7.00023	16.1153	1.12637	6.93063	7.0643	4.19944	4.37563	5.99594	3.36054	6.70718	6.51335	7.15659	4.28754	0.937278	1.67481	6.50027	4.25732	8.11622	4.40416	4.61239	3.95324	6.40887	5.58244	9.50994	11.1188	11.9297	12.5177	4.73328	4.6013	5.53955	7.52646	5.6156	6.33916	12.5732	8.72734	9.88865
17q21.2	NM_021078	2648	KAT2A	K(lysine) acetyltransferase 2A	0.836547	-0.257481	0.000163005	0.00225897	7.42572	9.21728	5.99923	5.51237	5.8183	6.14796	10.1942	4.99163	6.99938	7.44051	7.05714	9.99096	9.29135	8.95447	10.5713	8.11092	13.2252	7.35397	9.99853	9.94801	6.37075	3.34436	5.9335	8.84891	7.53633	9.80053	7.91573	6.3898	7.49001	7.90575	9.32595	10.3277	13.8244	11.9355	12.4042	12.2256	7.62455	10.5511	7.93007	8.95211	9.89739
2p13.1	NM_004263	10505	SEMA4F	sema domain, immunoglobulin domain (Ig), transmembrane domain (TM) and short cytoplasmic domain, (semaphorin) 4F	0.886695	-0.173491	0.000162971	0.00225897	4.29407	2.37005	1.34554	1.43169	1.57012	1.43971	2.50467	2.31651	1.70802	2.03843	0.940687	1.19732	2.39006	2.93805	1.89095	1.27483	2.7339	1.65653	1.84018	2.61905	3.008	1.12955	0.759011	1.52307	1.64572	2.09252	2.35242	1.84568	1.84417	3.6476	3.91114	4.44386	2.3524	2.68875	2.86326	3.76832	2.01625	2.56843	2.2304	3.05716	2.71481
Xq28	NM_001493	2664	GDI1	GDP dissociation inhibitor 1	0.886389	-0.173988	0.000164015	0.00226982	62.613	41.6036	45.7627	22.8632	49.1318	55.3092	73.9066	61.0984	39.0937	88.8708	21.4193	65.8417	112.976	46.035	56.414	57.6362	89.5433	56.6959	47.4098	57.9876	76.9654	39.8869	33.6278	53.439	67.9109	76.7279	52.2615	78.5991	43.6766	120.376	122.18	122.818	68.7938	59.0202	60.9414	95.4122	80.5605	85.9615	67.2524	60.3099	62.1705
13q22.3	NM_001040153	122060	SLAIN1	SLAIN motif family, member 1	0.628661	-0.669646	0.00016426	0.00227007	1.57715	2.80017	1.12032	2.5847	4.31365	4.33124	4.32496	6.27137	0.643109	9.47623	0.585702	11.3921	12.9683	2.08324	4.66078	4.05835	8.80462	4.21722	4.50267	4.7951	4.89895	11.8123	1.18094	10.798	13.1509	13.3933	9.40107	7.27897	3.99747	18.6018	18.3217	17.5927	4.62523	4.79638	4.38498	10.2843	15.5313	13.1959	5.07647	4.24485	4.3358
3p25.1	NM_022497	64432	MRPS25	mitochondrial ribosomal protein S25	0.924388	-0.11343	0.000164793	0.00227428	2.84515	3.74901	4.10694	3.09819	3.75556	4.72227	3.95274	2.92934	2.55945	6.55133	1.90464	3.14906	5.6209	2.02103	4.49076	4.83714	4.3971	4.1803	3.41483	3.1326	4.11908	3.30917	4.50718	4.13714	4.25311	3.69931	3.95398	4.33376	5.33481	7.06208	7.4943	7.09798	3.74503	4.31202	3.33596	5.54879	3.96651	4.2877	4.70402	4.1376	4.36712
7p22.3	NM_001284309	11033	ADAP1	ArfGAP with dual PH domains 1	0.847256	-0.23913	0.00016503	0.0022744	8.75638	2.6676	1.7053	3.49504	3.20123	2.77155	6.46214	5.17222	2.20243	2.95383	3.02515	3.99286	4.24383	5.3197	3.37374	2.87398	5.26039	2.85117	2.97475	3.88355	7.40445	5.3668	0.950337	4.8792	3.57589	5.19315	2.09752	4.13061	2.86124	11.645	11.8124	15.0152	4.019	3.28827	3.32387	4.01892	6.04401	4.04927	2.12422	3.89992	4.70187
17q21.1	NM_003250	7067	THRA	thyroid hormone receptor, alpha	0.780776	-0.357019	0.000165659	0.00227992	24.8056	20.3374	8.22031	5.36426	16.0697	18.6327	35.2945	10.1099	12.9529	26.7341	11.0454	41.6415	42.5162	26.8865	10.7418	11.9875	43.6468	10.7572	7.95796	6.65022	33.6289	19.0095	5.57915	29.5686	29.4857	32.9337	13.1188	9.58336	10.5032	58.0712	51.2577	60.5705	23.1219	17.472	21.22	27.4823	32.9444	29.4785	16.4376	18.6957	20.1075
20p12.3	NM_003818	8760	CDS2	CDP-diacylglycerol synthase (phosphatidate cytidylyltransferase) 2	0.810528	-0.303066	0.000170803	0.00234748	5.12823	5.95511	6.43254	6.03905	6.10485	7.73148	7.03695	2.33896	5.01848	12.1389	3.23194	6.14095	12.0846	5.02689	8.49186	9.08897	11.3038	10.4025	3.53641	3.56497	7.39219	7.2194	7.98165	6.87883	9.08537	8.90419	8.12354	10.4212	9.04292	12.5987	13.3316	14.5052	10.9534	11.3085	10.3621	10.3824	8.49372	8.42809	8.08849	8.55852	8.52946
21q22.3	NM_000071	875	CBS	cystathionine-beta-synthase	1.28511	0.361894	0.000171161	0.00234831	13.411	20.2697	34.2116	25.6297	18.9377	15.5648	14.1379	4.16213	26.0327	15.5576	19.506	9.16593	11.2293	15.5188	21.1415	23.139	12.2357	29.5953	17.9443	15.6202	11.0566	3.35543	31.4653	16.382	16.3545	15.4806	8.31041	11.3892	9.79809	8.0649	9.17128	7.89076	14.0474	10.6778	9.79106	9.53334	9.18221	6.80603	12.3844	15.4434	13.4649
15q23	NM_017882	54982	CLN6	ceroid-lipofuscinosis, neuronal 6, late infantile, variant	1.57255	0.653107	0.000171334	0.00234831	4.57494	4.86776	11.9505	13.5492	4.69112	3.78092	4.42337	6.57741	7.93541	2.39567	9.00351	1.69013	1.98611	4.1226	7.06309	6.05797	1.62165	7.72134	7.89283	9.98868	2.83084	1.56324	6.75675	4.64234	4.60132	3.38422	3.24617	3.78788	3.21106	1.99776	2.21855	2.40911	2.88608	2.08664	2.27239	2.53176	3.19424	1.80262	3.76897	5.0586	4.92476
4q24	NM_001142416	9255	AIMP1	aminoacyl tRNA synthetase complex-interacting multifunctional protein 1	1.14796	0.199078	0.000173005	0.00236471	1.9638	7.70368	7.33863	9.92717	10.1161	8.68136	2.12137	11.6624	7.78868	10.6067	7.04046	5.7853	7.24343	1.69956	12.8527	12.7494	6.17359	10.0273	10.8129	8.92181	5.4938	13.1566	16.6309	10.3332	8.27586	6.01782	10.5127	7.43769	9.10772	5.90273	4.85858	3.37284	7.70706	7.66898	8.17211	3.74787	3.80178	7.64338	10.2142	10.136	9.83613
21q22.3	NM_015151	23181	DIP2A	DIP2 disco-interacting protein 2 homolog A (Drosophila)	0.887022	-0.172958	0.000172974	0.00236471	2.57164	3.32237	3.44711	2.14317	2.52254	3.24386	3.76685	1.88299	2.4399	3.76219	2.13536	2.39109	3.12177	2.01364	3.94486	4.4414	3.78405	3.52651	2.94127	3.27854	2.18715	1.47336	3.6125	2.67178	3.42438	3.10701	3.16	4.17534	3.94274	3.80317	4.57998	4.71924	3.69385	3.57698	3.09588	5.65445	3.59545	4.46486	3.91911	3.10483	3.4169
1p22.3	NM_012137	23576	DDAH1	dimethylarginine dimethylaminohydrolase 1	0.775805	-0.366233	0.000173812	0.00236926	5.45503	23.492	7.0438	5.36003	11.8366	15.6267	12.1525	4.15834	10.9915	11.2639	10.2028	9.20818	9.54534	3.73292	6.19339	8.49722	9.4401	5.24308	3.39629	3.28558	7.80565	10.5393	5.20994	5.0263	7.29296	7.25788	8.83573	9.83079	12.0075	24.3754	23.2688	23.4998	4.7904	4.9063	5.37495	14.224	14.8175	14.0274	15.5089	15.131	13.6316
8p11.21	NM_002027	2339	FNTA	farnesyltransferase, CAAX box, alpha	1.10594	0.145268	0.000173693	0.00236926	7.81202	13.6524	23.3198	31.1303	21.1875	19.2112	8.25477	18.9009	14.5893	16.4336	10.9336	11.11	15.2631	7.14694	26.4983	34.2741	11.723	23.1086	28.2205	21.1565	13.2782	27.8519	25.9888	17.1635	18.1968	13.2479	19.3312	18.4027	17.6853	16.4354	14.0548	13.809	12.8828	14.2752	16.1798	9.78914	6.63749	13.2092	19.8255	17.1435	15.402
1p32.3	NM_007051	11124	FAF1	Fas (TNFRSF6) associated factor 1	1.15934	0.213301	0.000175437	0.00238815	6.12776	9.47185	10.5777	11.9855	13.5851	12.9733	7.25767	17.3034	12.8319	19.3199	8.24128	10.9264	17.1351	7.19712	16.3834	18	14.4619	17.4769	19.5121	14.3786	14.1404	21.0712	19.7812	9.83609	10.8239	9.00987	15.2016	15.0962	14.4641	13.7643	12.5437	12.4	10.4316	10.5525	11.4744	8.31966	7.18364	10.1177	12.4508	11.442	11.8305
14q22.1	NM_016039	51637	C14orf166	chromosome 14 open reading frame 166	1.0387	0.0547784	0.000176231	0.00239569	35.2214	70.4364	104.072	131.314	86.7481	79.4877	33.493	135.803	78.0274	76.921	63.3191	49.6856	59.236	33.0974	107.826	122.224	52.09	91.3829	116.725	79.383	60.5917	117.212	109.498	79.2	83.0406	60.5492	89.941	83.5566	91.112	50.7696	38.6102	38.6915	63.315	65.6154	77.6068	33.1421	41.9941	49.1697	79.44	66.2292	77.7822
7p15.3	NM_018719	55536	CDCA7L	cell division cycle associated 7-like	1.37505	0.459486	0.000177781	0.0024102	1.5193	1.71355	3.9873	5.54111	3.3272	2.55544	1.89825	6.24995	3.40777	7.23683	1.81649	4.07768	5.04678	2.87198	8.18118	8.47173	3.43945	8.57161	10.6172	9.27175	1.85727	2.84272	3.24092	5.71672	5.41943	3.5621	4.02682	4.5754	6.88415	0.802374	0.774595	0.846221	5.11255	5.62922	4.38719	0.891242	0.961608	1.0617	4.2828	3.92133	4.48496
1q42.12	NM_003133	6726	SRP9	signal recognition particle 9kDa	0.84693	-0.239685	0.000177561	0.0024102	30.1795	63.1057	92.3655	95.6238	79.4415	97.555	27.6928	65.1245	33.5122	152.853	33.7032	101.171	98.4262	33.7695	83.1891	111.039	75.9839	68.767	74.8063	58.3435	46.8411	138.008	76.7519	130.091	131.806	115.173	108.417	159.863	119.447	123.427	111.589	92.7779	93.376	99.3689	97.3468	70.0098	115.699	111.432	113.37	99.9656	100.096
19p13.11	NM_001080421	23025	UNC13A	unc-13 homolog A (C. elegans)	0.793613	-0.333492	0.000178415	0.0024155	1.98265	1.67263	0.527342	0.386859	1.04551	1.64918	4.26853	2.20402	0.508145	4.40829	0.363846	2.32271	5.64205	2.2969	0.930259	0.845018	9.18266	1.17755	1.21389	1.21449	4.01753	1.91152	0.205056	2.62343	3.21253	3.56989	1.41115	2.7296	1.15623	9.46102	9.73791	11.7162	1.69037	1.31752	1.44657	4.54979	3.22703	3.70485	1.62747	2.25649	2.63174
16q22.1	NM_001040715	653319	KIAA0895L	KIAA0895-like	0.786373	-0.346714	0.00017919	0.00242271	10.8725	6.49238	4.28473	3.09636	6.27647	7.19735	13.8133	7.36084	4.29427	11.7032	2.97877	11.3691	14.6808	8.84645	6.43626	5.95336	12.0119	4.90135	3.52323	5.15884	18.1373	7.30551	1.79416	5.98998	7.20563	7.08793	5.11082	8.82134	6.02675	29.6372	32.6938	34.4659	6.38381	5.77535	4.77817	18.8543	13.4149	14.466	9.40818	8.20013	9.44181
4p15.2	NM_018317	55296	TBC1D19	TBC1 domain family, member 19	0.82823	-0.271896	0.000179766	0.00242721	3.38681	3.61069	2.68416	2.30464	2.73228	3.58717	3.31977	2.57011	1.12212	4.13993	1.33295	4.34189	4.09136	2.6052	2.86605	3.93437	4.18031	3.15172	3.35383	3.02887	3.86188	5.44328	2.11327	3.1062	3.41904	3.72643	2.80094	4.61993	3.64299	5.95341	5.50521	5.75372	2.84819	3.22002	3.52919	4.25273	5.02399	5.71282	4.45308	2.63337	3.02131
2q12.1	NM_182640	64965	MRPS9	mitochondrial ribosomal protein S9	1.12639	0.171703	0.00018099	0.00244043	3.02187	7.09063	9.50631	7.61233	11.7549	11.4345	4.14282	17.1966	12.167	12.4329	6.82918	3.83447	5.86585	2.84011	12.6949	13.3095	5.44351	11.7172	15.5345	11.2062	8.38411	13.9312	13.2989	6.87609	7.22008	4.30788	11.3105	8.66964	10.0348	7.05241	5.73098	5.87234	7.55919	9.66926	8.85554	5.39875	2.63165	6.50207	9.49347	8.30747	8.73737
Xp21.1	NM_031442	83604	TMEM47	transmembrane protein 47	0.708511	-0.497138	0.000181409	0.00244278	4.35231	11.3075	8.05329	7.43231	8.00079	11.3162	4.27227	6.41679	4.63151	13.9577	4.40217	8.31257	7.12842	2.97239	9.61141	12.8163	7.75051	7.76159	6.47199	7.01936	6.60405	12.6739	5.19509	11.0865	10.2834	9.98485	13.5073	12.5373	13.1587	13.8382	12.7034	11.5166	5.30147	5.49435	5.71434	12.616	18.8611	18.1091	12.163	9.96509	10.2021
2q35	NM_024293	79137	FAM134A	family with sequence similarity 134, member A	0.923636	-0.114604	0.000183602	0.00245968	24.8665	18.9863	15.555	14.5857	16.0822	16.4208	26.5247	22.9757	20.3748	12.9723	19.4805	15.0649	16.6749	23.1649	21.7014	18.1796	16.8406	15.752	16.3422	16.0807	25.6984	12.5903	17.5782	17.1987	17.4754	18.411	12.504	16.699	12.8292	25.1599	23.973	25.8945	22.7394	17.1776	22.181	17.4447	20.7151	17.0517	18.1793	19.7302	23.4505
6p22.3	NM_153042	221656	KDM1B	lysine (K)-specific demethylase 1B	0.85844	-0.220211	0.00018321	0.00245968	1.56466	3.46876	1.53236	1.17291	2.26962	3.71605	2.43227	2.48061	2.0343	6.0184	1.46919	3.08197	5.72834	1.18626	2.65313	2.82823	4.32041	2.59185	2.67089	2.76148	2.75675	3.01932	4.45563	3.59543	3.49436	3.1587	5.70169	3.4007	4.55852	5.46445	5.50386	5.53276	2.89931	3.06037	2.99498	2.82253	2.77875	3.03194	3.64093	3.13064	3.38555
2q11.1	NR_103734	150759	LINC00342	long intergenic non-protein coding RNA 342	0.796778	-0.32775	0.000183489	0.00245968	1.64782	2.54948	0.700786	0.373821	1.05301	2.7248	3.02365	0.293061	1.79252	4.09559	1.37623	1.26481	3.08196	1.12453	1.98096	2.54786	3.08568	1.59781	0.83978	0.783448	3.05575	2.43804	0.694289	2.0271	2.10761	1.82768	4.00991	2.42981	3.87863	3.23981	3.93647	4.15023	2.5747	3.12114	1.39887	9.34427	2.71288	3.61832	2.03929	2.36055	2.94939
14q32.33	NM_015197	23241	PACS2	phosphofurin acidic cluster sorting protein 2	0.907206	-0.140499	0.00018365	0.00245968	13.7461	14.1118	9.36874	8.25165	7.25731	6.43193	19.0106	8.50817	10.5657	8.52375	8.80008	6.79347	9.55343	11.3909	6.93271	7.56671	10.0367	8.7362	5.07574	5.8725	14.4091	5.05452	8.17771	9.51563	9.17627	8.91385	5.84501	9.17042	5.83989	15.1107	15.4514	18.2026	7.80063	5.81344	8.33753	11.9203	10.4703	9.39587	9.00488	10.1154	12.3921
2p16.2	NM_001164165	100302652	GPR75-ASB3	GPR75-ASB3 readthrough	1.57248	0.653039	0.000184206	0.00246052	1.26805	1.89927	3.0574	5.19747	4.14452	4.2863	1.98039	7.9539	2.04562	6.19714	1.7269	4.3493	5.82438	1.14633	4.55672	6.9745	5.77597	4.35166	7.15804	5.72824	3.42635	11.4082	4.5344	1.93067	3.21576	2.17997	2.54271	2.89749	3.42636	3.35543	1.47122	2.57516	2.79214	3.27545	2.65156	0.939569	0.580952	3.9889	2.17808	1.15583	3.4952
19q13.12	NM_181786	284459	HKR1	HKR1, GLI-Kruppel zinc finger family member	1.12477	0.169626	0.000184009	0.00246052	3.89503	5.54254	8.34918	4.86698	6.89855	8.32851	4.36415	10.8625	8.36801	10.0113	4.77089	4.34475	7.78255	3.64778	12.1719	11.0598	5.95931	9.79242	9.86179	6.99538	7.79563	9.27865	10.101	8.63408	8.82847	8.13468	9.10862	8.17424	10.1027	5.41088	6.03553	6.05566	7.43162	8.77987	8.43494	6.69454	3.63739	5.76167	9.34278	6.58852	8.0518
1q43	NM_018072	55127	HEATR1	HEAT repeat containing 1	1.17038	0.226976	0.000185323	0.00247213	1.25354	3.88987	4.56733	4.05267	4.86938	5.60029	1.66858	3.7077	3.94301	5.91892	2.88504	2.93853	4.79382	1.04886	6.19735	7.57154	3.81355	5.81387	8.37227	5.80243	3.01116	4.24305	10.0495	4.52197	4.7412	3.20642	5.64153	3.96347	5.79342	3.38287	2.99428	3.18399	4.62736	4.6387	4.38837	2.66579	2.03284	3.13006	5.01311	4.30046	4.41789
8p21.1	NM_001831	1191	CLU	clusterin	0.846731	-0.240025	0.000185698	0.00247382	95.7586	125.463	99.655	61.814	99.3038	107.761	160.242	28.5067	175.474	40.3133	156.676	22.0605	29.1537	67.2883	99.4763	95.802	26.7618	59.0555	39.7182	32.3986	96.5706	71.1002	78.7079	69.4029	69.3374	59.5421	104.496	74.7993	85.9772	75.3806	69.9847	70.0582	132.206	111.217	148.438	87.9442	108.882	92.8255	110.901	132.095	129.548
1q25.2	NM_004319	460	ASTN1	astrotactin 1	0.653284	-0.614217	0.000185974	0.0024742	4.26529	4.69112	2.17343	2.22958	1.99567	2.80497	5.50783	2.86982	0.932055	7.10247	1.31645	6.80765	8.72001	4.91159	1.85026	2.34194	11.5195	3.19748	2.06821	1.66576	3.58704	2.20413	0.278023	3.8974	5.23117	4.97416	3.48418	6.1822	4.89547	7.57051	7.4016	8.12561	5.9061	6.01492	5.23263	6.16286	7.49475	5.67045	3.93125	5.34865	5.07224
9q33.2	NM_014222	4702	NDUFA8	NADH dehydrogenase (ubiquinone) 1 alpha subcomplex, 8, 19kDa	0.920184	-0.120006	0.000186385	0.00247502	17.3346	29.0699	25.5004	26.3764	28.0989	28.5442	29.331	17.4978	26.3219	23.1701	21.1411	19.9639	22.749	19.0596	30.0269	33.0854	20.566	28.6223	22.2864	18.5982	25.6022	36.4078	34.4769	23.0966	31.8977	25.1332	27.2545	28.114	31.573	33.072	32.4623	28.5148	27.0403	24.3955	29.1703	19.9178	23.9636	21.0817	34.1257	29.887	29.6836
16p11.2	NM_001286572	9810	RNF40	ring finger protein 40, E3 ubiquitin protein ligase	0.874963	-0.192706	0.000186532	0.00247502	18.9891	18.2547	16.6798	9.14415	13.4356	13.5841	18.8701	10.9741	17.9986	15.8206	11.8046	8.7001	14.7278	16.0892	18.2742	16.1118	12.0574	13.561	13.6069	11.8662	17.1647	5.8525	17.0449	14.9067	16.4798	15.7965	9.58129	19.4947	13.3831	19.911	19.1108	20.6917	17.154	16.5837	17.3182	18.4128	17.3	14.7546	16.9591	17.5142	18.002
6p22.2	NM_003513	8335	HIST1H2AB	histone cluster 1, H2ab	1.09732	0.133983	0.000187164	0.00247682	177.756	137.496	106.684	175.756	84.9539	71.0247	74.284	210.808	128.34	67.0624	182.937	53.7826	55.3764	202.672	138.229	111.798	59.1807	174.339	194.817	192.856	74.0977	93.7491	25.696	67.7929	71.746	64.6785	112.952	115.631	116.691	29.3296	22.322	31.4964	97.348	83.1309	93.4206	53.4463	85.8707	37.3603	68.9765	97.3885	105.44
7q36.1	NM_001099220	643641	ZNF862	zinc finger protein 862	0.891273	-0.166061	0.000186984	0.00247682	3.91888	3.38846	1.86922	1.36765	1.91258	2.09712	4.62052	1.68894	2.58276	2.50992	1.96297	2.19119	2.94121	3.24605	3.086	2.42799	3.63652	2.80819	2.1644	2.25627	3.57118	1.44805	2.3135	2.58538	2.87468	2.78572	1.89835	2.3254	1.78297	3.75006	4.13704	4.32088	3.03302	2.84269	2.47187	4.26547	3.42564	3.10942	2.72599	2.89556	3.21387
9q34.11	NM_054012	445	ASS1	argininosuccinate synthase 1	1.14831	0.199508	0.000187716	0.002479	36.0365	71.7979	50.2282	43.3396	56.4823	51.0182	53.2694	13.9107	59.0126	15.6618	61.2619	8.01931	12.0352	31.0519	44.9847	38.2338	10.2502	45.7122	34.395	26.399	24.0284	24.1836	44.7698	21.0625	23.3812	18.552	35.026	35.8945	29.103	5.83904	5.71005	5.53442	40.8331	37.1716	46.4368	16.7061	22.6975	18.1359	27.1352	32.5823	30.6282
4p16.3	NM_178557	339983	NAT8L	N-acetyltransferase 8-like (GCN5-related, putative)	0.811905	-0.300617	0.000188074	0.002479	4.19377	4.39915	1.21489	1.36108	1.35343	1.45763	5.42921	4.1273	0.813698	4.49772	0.979861	2.93164	3.05008	3.54803	2.23914	1.78692	6.84587	2.58573	2.08358	3.52219	3.99769	1.57087	0.733881	3.67007	3.79443	4.07481	2.26825	2.1524	2.00464	6.11374	5.3809	7.45632	2.36925	2.17046	2.69425	3.86507	3.18036	2.94867	1.89147	2.46502	3.04328
11q13	NM_031492	83759	RBM4B	RNA binding motif protein 4B	0.852383	-0.230427	0.00018786	0.002479	4.02656	9.12068	7.59404	5.36538	9.28249	9.89417	6.93578	10.9408	11.6749	11.7332	7.21662	4.15552	12.5015	4.43439	12.0142	11.2346	8.56972	7.32275	10.4617	7.74317	9.19033	13.9923	8.24312	9.3224	13.2042	11.2365	14.9581	14.2948	14.2202	16.3323	16.8627	14.2647	10.1782	10.8059	10.0222	10.5514	8.04356	11.1403	11.5736	10.283	11.3142
9q31.3	NM_003798	8727	CTNNAL1	catenin (cadherin-associated protein), alpha-like 1	1.11894	0.162128	0.000189251	0.00249123	4.55801	8.23758	13.8341	15.9839	14.083	15.1373	3.76793	18.6054	10.9832	11.5982	9.6468	4.43616	6.60801	2.90191	19.1851	17.7514	5.05695	13.7545	20.0356	16.192	6.26476	9.97115	20.0992	12.0051	9.133	6.02327	18.5493	9.5062	13.7803	2.69242	1.70146	1.95203	11.7519	14.3185	13.7098	3.96327	2.9305	3.89786	15.542	12.9225	13.3923
5p15.2	NM_007118	7204	TRIO	trio Rho guanine nucleotide exchange factor	0.887093	-0.172844	0.000190654	0.00250308	8.54239	12.793	7.22566	3.96849	9.75049	11.7125	16.248	7.65057	10.4706	13.6606	6.02722	8.31174	16.2019	7.0007	9.16325	9.562	18.5536	10.7896	9.76688	8.17341	13.5017	7.56216	13.8427	9.17915	11.3644	11.5677	10.0907	11.8882	10.2659	23.8359	25.3949	26.6251	12.1296	10.8527	10.6216	16.6269	11.2662	12.3407	11.3143	11.3682	11.6112
22q11.21	NM_001017964	150223	YDJC	YdjC homolog (bacterial)	1.38647	0.471418	0.000190517	0.00250308	8.74067	5.66083	7.52092	7.86249	6.14584	5.01654	7.09916	12.018	9.37368	4.71122	10.1565	4.34747	3.23131	8.1035	7.5073	5.67559	4.03331	7.01754	6.58989	8.70584	9.42311	7.7244	10.0865	6.69944	5.68908	5.93502	3.89308	3.24854	4.13577	3.38944	3.0271	4.17459	4.39976	3.9201	4.26719	3.53956	3.47898	3.48219	4.27597	5.17607	6.61261
6q14.3	NR_003038	387066	SNHG5	small nucleolar RNA host gene 5 (non-protein coding)	1.1507	0.202513	0.000192759	0.0025274	10.3003	215.673	63.5812	108.559	136.288	102.297	24.4646	92.4952	65.4717	21.3535	63.1401	52.9612	61.9386	10.4609	107.967	101.44	58.3023	81.6511	88.3868	68.4815	17.7378	44.91	95.6996	72.769	80.7894	63.7356	18.8974	27.4045	23.7575	19.5667	17.8344	13.3242	34.5599	31.9662	32.3904	36.0018	42.9012	43.4013	128.443	126.086	116.415
12q13.2	NM_079423	4637	MYL6	myosin, light chain 6, alkali, smooth muscle and non-muscle	0.9678	-0.0472185	0.00019385	0.00253836	271.62	208.714	401.638	392.084	254.312	212.85	365.666	346.213	201.231	234.236	172.92	142.308	195.346	293.421	296.259	327.756	159.817	380.684	335.359	240.151	295.976	750.598	419.79	224.729	270.612	247.279	269.293	383.687	298.35	383.816	337.674	314.632	259.21	215.028	198.769	245.91	370.077	245.515	238.853	262.671	273.529
11q13.1	NM_002689	23649	POLA2	polymerase (DNA directed), alpha 2, accessory subunit	1.27724	0.353029	0.000194179	0.00253935	3.95974	4.27005	6.37071	8.15417	3.91178	4.07785	3.9237	3.44186	5.5944	5.73154	4.1434	3.54461	3.92187	5.6635	4.89928	5.6051	3.57303	7.12192	7.26459	5.27052	4.41657	4.0198	4.83045	3.08895	4.11196	4.24568	6.16182	8.80586	6.72065	3.36513	2.69575	3.18346	3.42775	3.20833	2.93781	3.80008	4.66812	2.93614	4.06245	4.79679	4.47274
15q24.1	NM_001039614	388135	C15orf59	chromosome 15 open reading frame 59	0.912545	-0.132033	0.000196017	0.00254724	2.49981	0.801995	1.52181	1.35167	1.09159	1.06728	2.21577	2.30652	1.79912	2.66521	2.1527	4.08239	4.49367	2.60048	1.76891	1.57557	4.41267	1.43651	0.223534	0.936523	2.18463	0.796959	0.662697	3.13847	3.80391	4.34978	1.45246	4.0567	1.58781	4.68106	4.44186	5.59597	2.20259	2.02437	2.06526	2.38694	2.22337	2.06324	1.62254	2.22906	2.39114
10q24.31	NM_018294	55280	CWF19L1	CWF19-like 1, cell cycle control (S. pombe)	1.40467	0.490234	0.000196394	0.00254724	3.84675	4.44182	4.14868	5.86813	5.39197	4.77096	3.07304	8.53086	2.35521	5.41584	3.35017	3.86606	5.15436	2.788	4.85649	7.20691	2.29063	4.69657	7.8241	10.7926	3.7657	7.60056	5.45486	6.14544	7.63484	4.57951	4.65296	6.27924	5.41804	4.87321	4.48933	3.89316	3.45412	1.83027	2.39171	2.3839	4.38997	3.40438	5.63387	3.25682	4.20147
1p36.12	NM_017449	2048	EPHB2	EPH receptor B2	0.835147	-0.259898	0.000195976	0.00254724	21.2435	18.9839	16.4041	11.5913	14.1849	15.8391	22.4892	13.205	19.8169	14.8702	14.52	8.33074	10.2197	13.6172	15.8354	14.8172	12.2814	14.0988	11.1316	11.5514	20.6103	7.95937	10.2473	13.2961	18.5252	14.944	18.8724	27.758	12.3976	25.0562	25.8707	26.56	29.6979	23.84	25.9309	28.1331	28.5223	23.9392	18.295	21.0965	23.5611
12p13.2	NM_001987	2120	ETV6	ets variant 6	1.32736	0.408561	0.00019639	0.00254724	1.3361	2.51213	4.33594	2.63679	3.32142	3.39284	1.76961	1.74391	2.92122	1.77994	2.21847	0.896148	1.03854	0.949166	2.86106	3.36621	1.36913	3.60185	2.93929	2.4485	1.49312	0.905904	5.10579	1.47148	1.84433	1.32964	3.26492	1.75905	2.0434	1.19727	1.04278	1.25085	2.15955	2.04207	2.21874	2.31025	1.83892	1.68423	1.74004	2.04817	1.88516
10p15.2	NM_001300	1316	KLF6	Kruppel-like factor 6	1.26904	0.343733	0.000196203	0.00254724	3.41593	5.80066	9.37082	7.63135	7.20812	7.39667	4.09759	6.28632	5.18765	5.64368	4.22854	2.79917	4.63975	2.13512	6.85745	8.29625	6.80897	10.0466	10.7774	11.2649	4.15489	5.20638	13.6922	4.3623	5.63737	3.43208	8.6283	6.83797	6.56564	5.99953	6.61814	6.46713	2.80711	2.9618	3.17508	5.41064	4.00871	6.12028	6.48233	5.63307	5.83404
9q34.11	NM_016307	51450	PRRX2	paired related homeobox 2	2.03303	1.02363	0.000196826	0.00254724	5.48653	16.9301	2.78169	4.49364	2.50881	2.4619	9.66915	1.68388	5.2611	0.91077	4.8536	0.254667	0.378601	1.35234	3.97232	3.07298	0.344528	3.96269	3.27522	3.94087	2.99458	4.20434	2.18408	1.02705	0.524034	1.05109	0.997933	1.83919	2.25817	0.113326	0.076633	0.128399	1.32321	1.01458	1.0561	1.05841	0.810589	0.611988	1.00482	1.07167	2.60402
13q12.11	NM_145061	221150	SKA3	spindle and kinetochore associated complex subunit 3	1.30594	0.385084	0.000196818	0.00254724	1.0405	2.37629	3.08568	4.27198	3.51997	3.205	1.19255	4.03911	2.68723	3.79977	1.75784	3.50727	3.90215	1.13801	4.6327	4.85739	1.41931	2.91161	5.33824	5.74094	1.16827	2.82764	1.86744	2.46376	3.77925	1.97916	5.50043	5.59168	4.57927	1.35446	1.1317	0.800293	4.32945	3.05313	3.40181	2.03611	0.533189	1.38297	2.74897	2.88899	2.97929
1p31.3	NM_207014	79819	WDR78	WD repeat domain 78	0.67868	-0.559196	0.000195987	0.00254724	11.1999	8.53574	3.49755	3.39929	4.07082	5.16953	11.1095	1.60666	3.95155	4.44414	2.95636	3.12288	3.53159	4.53758	5.03783	5.83768	2.76735	4.3079	4.07491	2.34111	5.16642	7.51026	2.8229	4.56857	4.56068	4.2872	8.54438	8.11876	9.70854	5.65478	4.59562	4.5213	5.01572	4.04615	4.42091	6.56994	9.60851	7.08207	9.76081	8.08622	7.30523
9q33.2	NM_138777	92399	MRRF	mitochondrial ribosome recycling factor	1.24859	0.320298	0.000198332	0.00256342	1.94233	3.17968	5.65152	4.43377	5.30825	4.53882	2.47093	4.72066	4.45186	4.43589	2.94058	2.62375	2.70587	2.05438	5.2385	6.00914	2.76984	5.07504	3.79807	3.26795	2.72021	4.22949	8.23262	3.49023	3.4444	3.13386	4.59469	4.73638	5.00989	3.08126	2.43587	3.25156	3.26775	3.7182	4.20511	2.21298	2.68738	2.0469	4.43992	4.01001	3.70646
4p16.3	NR_003004	677770	SCARNA22	small Cajal body-specific RNA 22	0.839298	-0.252744	0.000200313	0.00258567	374.883	119.474	23.7838	372.153	639.104	428.987	757.271	247.32	85.9628	275.947	632.781	625.769	416.636	1297.89	664.799	586.51	472.955	958.492	941.933	1034.49	459.88	576.649	249.524	792.043	815.972	1197	346.67	1174.58	647.496	658.23	701.213	770.888	1026.24	920.463	909.449	754.259	519.626	519.286	843.802	1057.05	1024.3
1p34.3	NM_001113482	149175	MANEAL	mannosidase, endo-alpha-like	0.817036	-0.291529	0.000201177	0.00259346	7.83908	4.10399	1.26871	2.20921	2.98005	2.92043	8.97369	4.61791	2.84585	5.96746	1.80777	6.33563	7.10721	6.84321	2.08962	3.51114	6.83288	3.10086	4.43665	2.92592	12.0024	5.9565	1.78533	5.41922	4.42953	5.95006	4.14894	4.09881	2.07117	14.7903	13.5204	16.4102	4.69429	3.44716	4.08047	7.43831	8.87949	7.26022	3.08957	3.94233	4.97679
16p12.2	NM_020718	57478	USP31	ubiquitin specific peptidase 31	0.95247	-0.0702542	0.000201574	0.00259523	1.20282	1.8882	1.38322	1.12448	1.38838	2.11332	1.98286	1.76154	1.37497	2.59019	0.839702	1.95897	2.30928	0.955419	1.9257	2.19998	3.31556	2.08956	2.52908	2.04238	1.62817	1.56398	1.95287	1.88406	2.0414	1.58208	2.65383	2.56656	2.4457	3.39417	3.71654	3.62091	1.78821	1.93595	1.70569	2.67754	2.04864	2.48927	2.04882	1.9171	2.33683
22q11.21	NR_110533	26220	DGCR5	n/a	0.792603	-0.33533	0.00020477	0.00263298	3.56323	1.96159	0.343642	0.649842	1.00934	1.58841	4.71369	3.82296	0.563627	1.75778	0.648033	3.42603	4.56393	2.66012	0.737285	0.506819	3.88744	0.956719	1.25256	1.18265	4.48461	4.56892	0.079167	3.41055	3.2311	4.78164	1.89681	2.17146	1.13835	6.26533	6.33879	6.59398	1.27082	0.989685	1.26231	3.22427	4.20954	3.43351	1.54469	1.43387	3.51574
15q22.31	NM_016213	9325	TRIP4	thyroid hormone receptor interactor 4	1.18707	0.247403	0.000205727	0.00264188	2.56372	6.72302	3.83896	4.50797	5.82675	5.3775	4.0919	6.5028	3.71349	4.23553	4.66031	3.03266	4.04068	1.95778	5.98273	5.77553	5.65187	7.26005	8.38091	7.471	3.83368	6.90734	6.1361	5.51867	4.83236	4.51321	4.71417	5.00193	6.89554	4.644	4.06109	4.80006	3.99409	4.18233	3.55125	3.31864	3.3298	4.3238	5.60826	4.93677	5.59035
1p31.1	NM_005455	9406	ZRANB2	zinc finger, RAN-binding domain containing 2	0.726584	-0.460798	0.000207467	0.0026608	1.69574	7.83691	5.9133	4.43992	6.52046	9.40678	2.39466	3.84639	4.74516	12.4057	3.57919	6.18145	4.31881	1.94505	10.0238	7.59853	8.36477	5.32083	7.22944	4.67117	3.93362	6.83571	9.29116	12.4148	10.2573	8.65705	13.0283	10.4356	14.4851	9.80377	7.68322	9.28561	9.0081	10.1025	10.2965	8.16638	8.19549	9.31023	11.839	10.9781	9.90811
Xp22.2	NM_021109	7114	TMSB4X	thymosin beta 4, X-linked	0.873656	-0.194862	0.000208175	0.00266646	1169.97	613.482	983.394	1351.28	926.24	847.988	907.232	777.539	833.515	1155.62	866.519	905.902	1107.88	1130.4	1440.76	1563.05	909.762	1059.43	850.667	707.31	1570.98	3223.3	1092.64	1254.11	1384.68	1303.47	852.682	1514.02	1038.63	2506.85	2201.59	2030.49	483.802	472.266	488.678	920.16	1297	1008.11	1153.47	994.789	1052.06
3q21.3	NM_004526	4171	MCM2	minichromosome maintenance complex component 2	1.20435	0.268257	0.000211245	0.00270231	21.1762	18.8001	26.8313	26.5725	14.7765	13.3071	12.5573	24.4295	23.1827	25.099	19.1139	12.1742	15.8262	31.1891	27.5948	25.9873	14.9668	33.4136	32.5613	32.219	13.7495	6.20379	9.44335	22.0578	25.6927	20.2191	11.24	30.6857	20.4417	7.65083	7.25613	9.08962	19.6326	15.0694	15.9086	14.3213	16.9513	8.53356	11.0849	15.4435	16.7301
15q22.2	NM_004039	302	ANXA2	annexin A2	1.09386	0.129433	0.00021168	0.0027044	52.5898	132.472	228.429	158.652	274.946	238.457	68.5363	51.7359	350.641	41.9872	287.209	13.9451	26.9485	20.1869	300.781	299.884	16.0445	171.252	182.043	146.672	75.1646	130.5	456.991	90.4015	102.223	50.5433	197.034	90.7932	166.761	13.9651	15.5818	11.5673	77.0747	78.0504	76.3878	45.9519	33.189	42.1372	192.45	200.713	168.568
8p21.1	NM_001440	2137	EXTL3	exostosin-like glycosyltransferase 3	0.88356	-0.178601	0.00021227	0.00270502	17.4288	11.4003	9.86913	7.52003	8.75574	9.67093	16.6108	9.3887	9.0036	12.5162	6.16552	8.93453	14.3928	10.8799	11.9456	11.3077	15.4893	14.7489	12.4243	13.0641	14.4176	5.97026	8.48266	11.1062	12.8694	12.3988	9.90571	12.5169	8.13175	20.0495	19.8304	20.5796	12.3678	10.0684	11.8094	15.9598	14.7108	12.9697	9.22953	10.7179	11.2587
7q34	NM_020119	56829	ZC3HAV1	zinc finger CCCH-type, antiviral 1	1.32028	0.40084	0.000212256	0.00270502	0.739627	1.81314	6.25494	3.51473	4.49823	5.15493	1.12594	1.34719	6.15062	2.07287	4.18388	0.659971	0.936458	0.80348	5.02944	6.55777	0.744501	4.05452	3.41515	2.43758	0.807354	0.655733	7.44079	2.19178	2.65778	1.7089	3.92501	2.02971	2.9831	0.222127	0.355309	0.228349	3.75394	4.44947	4.22603	1.53955	1.2152	1.56302	3.22227	2.94776	2.76531
2q33.3	NM_003812	8745	ADAM23	ADAM metallopeptidase domain 23	0.851805	-0.231404	0.00021483	0.00272635	1.09694	1.78448	0.848592	0.637461	1.20019	1.96534	1.66797	0.709758	2.01433	3.26558	1.68172	1.9131	3.69783	0.756335	1.61377	1.86817	3.23438	1.49575	1.00055	0.839958	1.65273	1.7195	0.82436	1.92264	1.9073	1.40091	3.10493	2.56414	2.75861	4.25862	5.04498	4.34563	1.49108	1.71171	1.10217	2.45499	1.63073	2.42833	2.28853	1.82022	2.00306
17q11.2	NM_001085454	28964	GIT1	G protein-coupled receptor kinase interacting ArfGAP 1	0.696652	-0.52149	0.000215037	0.00272635	11.5391	3.76756	1.73654	1.19225	3.88671	4.26456	21.7359	10.5806	2.74679	11.2862	2.94429	21.5726	19.6233	11.9021	3.12873	3.43771	30.7579	3.20899	1.49911	2.56252	16.3227	4.65725	0.73463	11.5947	10.6265	18.5999	3.14328	5.80456	2.24167	26.7433	25.3367	29.4034	5.46245	4.12373	4.95688	9.99996	11.8471	11.9381	5.99357	7.57513	9.16884
12q13.3	NM_004984	3798	KIF5A	kinesin family member 5A	0.686876	-0.541878	0.000214757	0.00272635	8.65806	4.92916	3.09587	1.18802	5.4082	8.58606	13.0506	7.75432	3.97379	16.4348	1.77439	11.1359	25.3855	7.51647	4.41498	4.86	26.4091	6.88351	6.19546	6.06731	15.1921	8.76448	1.00399	7.99766	11.4159	13.1544	8.13057	12.4825	8.18725	34.5509	37.7941	40.6593	8.51738	7.77354	8.45377	20.525	14.4444	15.6357	10.7745	9.6806	10.1194
4p15.2	NM_001145432	389203	SMIM20	small integral membrane protein 20	1.06455	0.0902449	0.000214233	0.00272635	10.9915	22.2684	24.8472	26.493	21.7013	16.906	13.2768	20.9285	16.2394	13.9957	11.3058	13.5975	13.1742	13.55	20.3605	22.003	14.024	29.8887	25.4652	18.3253	11.0311	19.748	21.729	18.3041	18.3949	18.2546	17.5425	16.5784	15.0079	8.49937	7.89234	5.93141	21.6162	19.4421	23.3029	9.55951	15.1112	12.8238	15.2154	16.987	14.4337
5q13.3	NM_014886	10412	NSA2	NSA2 ribosome biogenesis homolog (S. cerevisiae)	1.06285	0.0879426	0.000217558	0.00275264	11.1106	32.7868	40.2244	45.1333	62.9083	61.477	11.1461	58.4711	38.608	33.3814	35.1264	22.6956	27.273	13.4934	53.2392	50.226	21.1675	32.181	44.6171	35.082	29.3306	47.0896	44.7861	35.2592	29.8278	23.5923	48.8483	40.0908	47.3276	24.374	16.0598	18.4438	40.7642	46.3235	43.119	13.1529	14.8682	18.4723	39.6007	38.3555	40.5594
19q13.4	NM_001136135	6158	RPL28	ribosomal protein L28	1.08108	0.112473	0.000217662	0.00275264	181.913	165.823	246.176	268.496	186.372	131.212	169.254	273.374	277.604	79.2534	313.885	101.158	99.9745	253.724	235.388	191.047	61.2464	218.965	174.786	183.515	141.477	169.789	196.013	123.513	136.809	157.535	106.017	130.299	157.514	56.8754	59.5974	62.4418	147.277	116.1	124.857	77.3182	129.706	69.4655	127.772	161.011	180.887
14q24.3	NM_006029	9240	PNMA1	paraneoplastic Ma antigen 1	0.833026	-0.263566	0.000217989	0.00275329	21.7186	18.6121	13.7948	13.4998	14.3196	17.684	25.2224	19.7287	10.3387	31.8448	8.96842	31.0435	48.1477	21.2139	18.1733	19.2275	44.8223	25.5692	26.2026	27.72	16.7115	14.6416	10.2293	26.6262	32.8676	34.9885	21.8554	26.4019	17.0071	38.5839	39.626	41.9451	20.5257	18.9895	20.6744	35.2976	36.5033	33.0216	21.5186	21.1286	21.0242
15q11.2	NR_022011	347746	PWARSN	Prader Willi/Angelman region RNA, SNRPN neighbor	0.789246	-0.341454	0.000218984	0.00276236	2.48155	7.4071	5.61951	5.84045	5.09753	9.35527	5.55053	3.74121	4.59333	13.2692	2.31073	8.90542	12.694	3.28532	5.01321	8.44039	10.9066	8.4419	4.9424	4.71537	3.53773	4.25205	4.90764	6.57959	5.98038	5.27599	8.6619	7.50417	9.29572	14.2742	14.8914	13.3376	7.13171	7.75925	5.00736	12.9497	8.69171	11.2569	8.79741	6.25946	6.73273
17q21.2	NM_001040431	28958	COA3	cytochrome c oxidase assembly factor 3	0.938262	-0.0919372	0.000219825	0.00276946	35.7858	34.2281	43.282	56.1463	36.1865	32.5892	34.0354	32.9546	37.752	33.9033	32.5122	25.6447	32.19	26.2296	47.0242	45.729	29.4563	37.8016	35.9974	27.4118	40.8034	69.6437	33.7254	34.2385	43.2394	39.9192	41.6686	43.0568	36.0519	58.1183	47.2838	48.3465	38.5395	39.3755	38.5335	32.3375	45.1489	32.0612	40.3079	32.9681	38.0321
1q44	NM_017865	55657	ZNF692	zinc finger protein 692	0.880909	-0.182936	0.000221495	0.00278698	5.57722	5.66838	4.0608	4.2694	3.63683	2.71686	6.28845	5.67194	5.74058	5.13948	4.0861	3.43002	5.92335	4.84661	5.75137	4.94254	6.08988	4.57688	4.82813	5.56141	4.64858	3.9087	4.46802	4.20318	3.64479	5.19498	3.52156	4.81507	3.29583	9.53414	8.40456	8.83434	6.15094	5.65319	4.54903	7.48266	3.55431	6.288	5.10315	5.23058	7.03066
16p13.3	NM_002952	6187	RPS2	ribosomal protein S2	1.09567	0.131814	0.000221938	0.00278904	2514.37	2411.25	1904.76	2302.09	1972.93	1460.1	2511.35	3207.15	2467.22	871.184	3070.46	1017.59	1085.11	2667.83	2015.67	1657.67	960.429	2663.9	2386.51	2299.76	1778.16	1576.61	1154.26	1274.39	1356.07	1369.06	1168.7	1277.83	1360.73	677.999	639.806	698.702	1231.28	989.947	1094.68	851.164	1438.93	866.418	1500.01	1893.77	2118.1
14q11.2	NM_014178	29091	STXBP6	syntaxin binding protein 6 (amisyn)	1.43877	0.524832	0.000223424	0.00280419	0.974381	1.36663	10.9823	8.2456	10.4706	9.91407	1.63027	1.25026	7.2734	2.39873	5.58975	3.26228	3.99619	0.964858	7.98314	8.3985	3.90245	3.98296	3.41091	3.43923	2.04138	1.93645	9.88177	5.04979	4.7486	3.95732	4.03538	2.89362	3.5823	2.7013	3.50119	2.79122	2.57541	3.36538	3.50071	1.67609	1.31406	1.66404	9.32141	9.28358	6.96263
2q35	NM_001199764	5798	PTPRN	protein tyrosine phosphatase, receptor type, N	0.807585	-0.308314	0.000224949	0.00281978	6.20129	2.61709	1.39398	1.77461	2.30282	2.00512	6.81764	3.9939	2.08472	5.1549	1.30853	7.79558	7.42885	6.11185	2.27818	2.3115	7.02139	2.41177	1.98347	1.1893	7.63958	2.98998	2.38556	5.56026	5.74163	5.50821	1.5911	6.49401	2.07959	8.68465	10.8922	7.39634	3.23857	2.42009	2.99028	5.11002	3.44798	4.44809	4.29197	4.70933	5.65573
6q26	NM_000301	5340	PLG	plasminogen	1.70926	0.773373	0.000225843	0.00282742	0.207383	0.163906	36.1817	21.3338	6.4026	3.32597	0	0.030313	2.51174	0.469194	1.36227	0.063559	0.016116	0.019324	7.59229	10.0455	0.117811	8.66176	3.24072	1.60763	0.230647	0.465045	2.73077	1.90724	1.14705	0.732605	0.854694	0.761727	0.941656	0.076914	0.091152	0.063098	3.36684	4.16227	4.21703	0.651874	0.699717	0.903292	0.819805	0.640432	0.927761
13q21.33	NM_001071775	440145	MZT1	mitotic spindle organizing protein 1	0.712465	-0.489108	0.00022632	0.00282985	2.23917	4.71003	4.00965	5.34341	2.28329	3.27234	1.46068	7.58095	1.93785	11.6543	1.46094	7.22822	6.81358	3.53549	4.1846	6.93373	5.49893	4.42736	4.60987	4.58166	2.42005	5.23223	4.18544	8.45303	9.1587	9.55415	5.58987	13.0695	8.95919	7.65587	7.57864	6.09215	5.18279	5.28963	5.91742	6.35331	9.66061	7.65619	5.92184	5.74085	5.5776
4q13.2	NM_001812	1060	CENPC	centromere protein C	1.19334	0.255005	0.000227836	0.00284524	1.75688	3.59581	3.97172	3.22183	3.73255	4.38737	2.1764	6.13021	2.82532	6.50268	2.03641	2.7381	4.86376	1.60495	5.59855	5.81326	4.13712	4.95757	6.36894	5.21393	3.14095	4.96002	5.60715	4.14201	4.28419	3.14315	4.38914	5.75383	6.37889	3.16316	3.2406	3.74696	4.50368	4.74477	4.05008	3.21533	2.1838	4.04678	4.48873	3.97785	4.07727
9q34.3	NM_206920	158056	MAMDC4	MAM domain containing 4	0.834966	-0.260211	0.000229881	0.00286719	1.34064	2.62051	1.35084	1.20962	1.52614	1.92698	2.3422	0.90678	2.61321	1.95292	1.73973	1.6355	1.3373	1.61513	2.75477	2.20865	2.08415	1.18466	1.19234	1.30513	1.62194	1.18582	1.7868	1.37047	0.972128	1.39554	2.28715	1.24128	1.65506	1.71914	2.36199	2.68343	2.80131	2.89041	3.06386	4.13796	1.22592	2.51413	2.71602	2.52166	3.11948
2p13.3	NM_001617	119	ADD2	adducin 2 (beta)	0.733219	-0.447684	0.000230739	0.00286764	6.06032	6.01708	4.8414	2.09615	4.31963	5.19464	8.25101	3.71113	2.92453	14.7953	1.86786	8.39127	14.1065	7.03965	3.99253	4.4746	21.2727	7.01091	3.98758	5.50946	8.7634	4.62383	1.60474	8.93135	11.448	6.75794	8.03972	15.1884	6.83929	14.9524	16.4588	18.6339	10.3884	9.11255	9.01958	9.90691	8.01307	8.47113	9.52941	9.00822	9.57727
17q21.32	NM_006546	10642	IGF2BP1	insulin-like growth factor 2 mRNA binding protein 1	1.14961	0.201146	0.000230945	0.00286764	9.11035	8.73276	25.8355	17.1554	11.6547	13.2187	6.29347	11.8271	17.0258	13.4511	10.8437	4.17232	6.24129	8.24259	18.3606	19.7836	8.13082	32.6995	32.2714	26.9693	5.66774	2.78707	17.8535	8.95876	11.241	7.87203	17.0034	13.9538	14.9594	2.74821	2.84406	3.14709	17.1428	14.9914	14.8506	10.586	7.92723	6.5971	10.3544	11.5989	11.8704
17q12	NM_032339	84299	MIEN1	migration and invasion enhancer 1	0.939692	-0.0897405	0.000231067	0.00286764	38.097	29.7138	26.936	29.8129	23.1453	19.6093	36.8127	46.1145	29.7319	22.9132	30.3908	26.7286	28.1602	45.3518	26.9586	23.5559	25.6983	24.1836	25.7158	23.7314	39.6434	48.71	26.3354	38.8352	38.8846	37.6673	21.4974	24.681	21.9957	30.2178	26.9493	26.8267	31.4517	26.1767	30.3491	23.776	30.2507	25.9048	20.8996	27.9614	32.1664
10q26.2	NM_002417	4288	MKI67	marker of proliferation Ki-67	1.3016	0.380283	0.000230735	0.00286764	2.23995	5.26103	2.3421	1.48438	3.10053	4.223	2.85531	7.76986	4.88006	7.02135	3.67712	1.78685	4.50178	3.06581	5.65732	4.57503	6.90629	9.67586	12.184	8.81439	3.09456	2.40105	2.00767	2.79678	3.62602	2.60015	7.70334	9.13525	9.24073	1.27359	1.25741	1.08962	4.87416	3.59282	3.42921	5.26992	3.09963	2.80106	2.67613	3.44897	4.07699
3p21.31	NM_020242	56992	KIF15	kinesin family member 15	1.28869	0.365903	0.000232244	0.00287352	0.898419	3.15971	2.78913	2.00453	3.42818	3.80181	0.998147	9.11217	3.00743	7.22531	2.16099	1.93078	5.73756	1.70411	5.43728	3.75451	3.88742	5.81736	9.38231	7.19471	2.95216	4.10048	1.52531	3.35308	2.93783	2.06105	6.57634	7.79874	7.1576	1.49889	1.37249	1.78732	3.55748	3.4831	3.31503	2.41547	1.56919	2.27057	3.20326	3.58527	3.52439
3q22.1	NM_015103	23129	PLXND1	plexin D1	1.53472	0.617976	0.000232688	0.00287352	10.9715	15.9322	12.8099	11.012	8.15606	7.18906	10.3708	4.73676	16.2504	7.83922	13.0764	14.3612	16.2025	10.3622	11.759	11.304	20.1658	13.835	8.66016	10.2877	5.47368	1.85872	10.3855	11.3786	11.4021	14.0999	9.53993	6.52531	7.17725	1.4786	1.4703	1.56525	8.9011	7.53527	10.2785	6.68857	5.36563	6.05981	5.93897	7.41092	8.01044
18q21.1	NR_003003	677769	SCARNA17	small Cajal body-specific RNA 17	0.844282	-0.244203	0.000232692	0.00287352	32.7613	70.844	26.5755	19.7838	26.8561	30.639	36.2835	31.524	24.1224	102.446	14.943	46.5941	71.1056	58.2402	91.0989	78.6439	53.9639	35.9025	34.9752	42.0032	48.1945	42.9218	99.6824	74.6654	64.4593	60.5248	43.0325	66.6554	82.8338	54.929	68.0196	62.358	75.5247	80.5351	85.7578	74.8353	25.9653	65.1744	80.5039	68.0149	77.5292
14q32.33	NM_006427	10572	SIVA1	SIVA1, apoptosis-inducing factor	1.12866	0.174608	0.000232629	0.00287352	54.5571	83.154	39.3575	65.0347	39.3658	31.1596	64.6462	91.7376	62.2107	23.9343	79.909	18.36	17.8461	62.7473	51.2318	42.4334	20.0109	55.1195	52.3724	58.8459	51.1052	61.954	34.4516	40.096	42.4996	38.4021	24.0296	40.848	35.9454	15.3485	12.5449	15.5649	26.2429	23.4571	28.4877	21.9706	32.6331	16.2076	32.5748	44.5509	52.3197
22q11.22-q11.23	NM_002073	2781	GNAZ	guanine nucleotide binding protein (G protein), alpha z polypeptide	0.736715	-0.440822	0.000233179	0.00287598	12.4995	11.0541	6.32268	5.32557	9.92021	11.2063	15.664	10.8113	6.12808	20.2942	3.4472	26.0938	27.318	16.5865	8.03625	8.00307	29.317	9.17432	6.66285	7.14946	14.5315	7.02997	1.44864	21.232	23.5799	24.8736	9.68531	12.9211	5.91021	45.1144	43.573	46.5757	9.87734	9.07704	9.5726	16.0219	15.8708	15.6268	12.1194	11.0289	13.445
9q31.1	NM_001198812	100526694	MSANTD3-TMEFF1	MSANTD3-TMEFF1 readthrough	0.686087	-0.543536	0.000234759	0.00289189	2.26627	5.09441	7.51858	7.83751	7.47634	14.5905	5.13527	25.8261	4.53104	24.5335	1.14282	13.6485	27.4914	5.04812	9.8523	10.7938	19.8359	7.2657	14.0826	9.86286	11.4909	24.9991	7.22461	22.2057	18.1773	18.6444	22.8247	26.043	13.9311	27.4322	27.2504	22.3787	20.536	20.2543	18.8598	14.0388	18.132	21.3834	11.2672	13.536	10.9648
8p23.1	NR_024281	157627	LINC00599	long intergenic non-protein coding RNA 599	0.697915	-0.518878	0.000236697	0.00291216	1.09033	0.630133	0.481623	0.208262	1.11773	1.41441	1.3862	1.03714	0	8.39677	0.081621	8.71148	11.8807	2.02988	1.75802	1.76645	9.52539	0.737561	0.769284	0.748055	2.53798	2.03105	0.053298	5.10274	4.8329	6.73101	1.75534	1.24166	1.41432	9.95559	14.7927	13.4951	1.6501	1.73449	0.876955	10.1511	2.54361	6.41335	2.10037	1.05853	1.4473
6p22.2	NM_003537	8358	HIST1H3B	histone cluster 1, H3b	1.06033	0.084513	0.000238634	0.00293237	798.352	702.372	565.37	725.772	537.241	394.409	365.148	1516.52	752.093	458.257	837.339	322.217	368.98	1051.19	679.402	536.325	369.115	785.79	768.24	810.203	447.024	389.018	87.2081	434.718	407.315	337.874	449.422	818.432	524.75	134.549	91.861	123.274	311.86	234.33	286.489	277.804	444.878	197.628	323.122	470.894	553.918
10q23.31	NM_006413	10556	RPP30	ribonuclease P/MRP 30kDa subunit	1.18636	0.246543	0.000239861	0.00294383	2.9995	4.27915	6.11552	7.47468	5.59264	5.53329	2.8444	7.97894	4.34083	6.34313	2.86797	3.98076	5.1048	2.22331	5.87796	6.62865	5.1014	6.75381	7.97885	6.95421	4.57719	9.26397	4.7175	4.2519	4.52676	4.13241	6.57318	5.90371	5.01309	5.18236	4.57452	3.50317	4.79772	3.50352	4.3597	3.24833	4.65164	4.67704	4.1837	3.14169	4.24292
13q33.1	NM_024089	79070	KDELC1	KDEL (Lys-Asp-Glu-Leu) containing 1	1.07162	0.0997889	0.000240201	0.00294438	3.20152	9.96561	6.46995	7.33794	8.6444	8.53765	3.13259	6.34917	10.992	7.52452	7.49733	2.86107	4.1636	2.37518	9.78853	11.3372	3.16125	7.6784	9.00326	8.29369	5.59641	8.24356	5.48613	6.89666	7.07144	5.70609	10.5273	7.74844	7.58226	3.31618	3.38934	3.25809	10.678	10.1224	10.6398	4.07575	3.7027	5.36081	7.33712	6.79297	6.56947
21q22.11	NM_000628	3588	IL10RB	interleukin 10 receptor, beta	1.15495	0.207829	0.000242241	0.00296575	2.87776	11.7004	9.48343	8.20455	10.5901	10.9582	4.87997	4.25284	9.89643	4.42144	7.47818	4.35816	5.07477	1.25894	9.39208	10.6728	5.54686	7.75347	5.58501	6.0054	4.44406	6.73135	10.0234	5.61207	5.87169	6.27532	10.4747	5.45712	6.27256	2.88781	2.54066	2.38911	8.82131	7.83924	10.1263	4.53468	5.07206	5.72982	7.96365	5.68774	5.76841
21q22.11	NM_006933	6526	SLC5A3	solute carrier family 5 (sodium/myo-inositol cotransporter), member 3	0.653234	-0.614329	0.000242936	0.00296697	4.58354	16.8405	6.07184	5.17579	7.04252	12.9327	9.31987	4.50896	8.60198	15.4143	4.62565	4.78422	7.84853	2.76742	12.0948	16.134	10.0339	8.01638	9.89349	7.58521	4.21169	7.03111	9.67562	9.61463	9.22513	7.5658	18.6227	8.4616	22.2381	6.85102	7.37369	6.76392	14.9756	19.553	16.4494	7.82366	5.71899	10.1972	20.2829	17.6108	17.7506
6q22.1	NM_003309	7259	TSPYL1	TSPY-like 1	0.851686	-0.231606	0.000242773	0.00296697	9.54537	10.3207	17.087	10.8642	13.9444	16.6736	11.797	7.52834	8.92855	19.0284	6.70817	14.1005	19.0061	8.26335	12.7417	18.7342	15.5989	14.6237	11.4719	11.2957	7.79807	9.41718	19.2417	17.2676	26.1363	24.2258	11.2612	15.2948	11.9994	25.3788	24.9351	24.9359	19.2206	19.9246	21.0948	14.1867	14.342	12.6534	20.373	12.8814	12.0532
20q13.13	NM_001285879	1051	CEBPB	CCAAT/enhancer binding protein (C/EBP), beta	1.38089	0.465603	0.000243878	0.0029729	3.02011	8.131	6.81937	4.91053	5.86991	5.52724	4.29743	5.5068	8.20586	2.58449	9.34952	1.61794	2.23434	3.5153	6.04599	6.62921	1.93655	6.30532	8.9583	8.7304	3.02508	1.49806	9.2649	4.58279	3.73546	3.7152	3.60991	2.72816	1.3926	0.978772	1.08403	1.13596	4.46758	2.8972	4.50256	1.99222	2.00992	2.28771	4.37852	5.017	4.88841
5q21.3	NM_001962	1946	EFNA5	ephrin-A5	1.29342	0.371187	0.000244017	0.0029729	1.82059	8.15725	6.15209	4.58917	4.14416	5.15442	4.06546	1.81501	6.1046	3.70098	4.90052	3.03396	4.29678	0.955136	5.90819	6.09742	6.63249	6.61684	5.23765	4.68648	1.31265	1.53862	6.84924	2.94252	3.40864	2.18117	4.50979	2.9387	5.55587	1.52593	1.65665	1.75785	5.04712	5.70743	4.43521	2.69802	1.68869	2.90249	5.05785	4.73566	5.14781
6q25.1	NM_004690	9113	LATS1	large tumor suppressor kinase 1	0.81984	-0.286586	0.000245194	0.00298359	1.82542	6.25102	3.53003	2.60981	3.41186	4.75997	2.9116	3.37975	2.21784	7.17223	2.09799	3.56593	5.66274	1.44281	3.32559	4.48509	6.24579	3.79427	3.98811	3.62957	2.2597	3.60101	5.15269	5.32917	5.00518	5.13047	5.85224	4.04557	5.6897	5.55044	4.69735	5.73372	3.51627	4.64086	4.29769	4.51622	5.20572	6.38391	4.77675	4.97593	4.99719
8q24.13	NM_001282974	9788	MTSS1	metastasis suppressor 1	0.654479	-0.611581	0.000245604	0.00298494	3.73792	4.85763	1.36284	0.959257	3.76772	6.74355	8.88176	3.44345	1.85617	11.2144	0.919735	12.1411	20.1233	2.20895	1.5488	2.70317	18.8963	1.19394	1.54135	2.83138	9.3049	6.38532	0.253394	8.04359	8.94436	8.71737	4.23929	7.24987	2.44123	22.7819	22.7109	22.5107	3.54928	2.89128	3.04836	9.74573	8.28316	11.5742	7.25293	4.30402	6.19751
1q22	NM_007221	11243	PMF1	polyamine-modulated factor 1	1.2455	0.316719	0.000246153	0.00298798	25.2517	18.5283	27.7306	30.6129	20.967	13.6685	23.5707	31.0908	29.5785	16.6183	28.3902	9.41811	13.0995	28.3571	24.008	15.4421	9.1987	29.1637	20.7025	13.9951	24.2547	19.1935	26.4471	15.4698	18.7455	14.198	10.3624	29.9734	15.952	10.6007	9.71086	9.09038	10.1786	6.53219	7.82727	12.9592	12.897	11.522	13.5696	19.0914	18.7108
9q34.3	NM_001282612	10439	OLFM1	olfactomedin 1	0.65814	-0.603533	0.000249638	0.0030266	13.4113	10.7834	6.50143	4.00865	9.92451	14.5399	14.2709	12.321	3.70558	33.5961	2.89558	32.8051	54.3816	11.4899	9.73288	10.058	37.7263	7.88857	5.82056	4.52743	15.9631	17.4538	0.826604	22.2076	23.124	28.0288	18.9086	22.5807	13.0597	52.3522	52.3067	44.4742	17.7555	14.0774	12.6346	19.7634	21.7272	22.6162	18.2008	15.5571	13.3183
2q24.3	NM_020981	8708	B3GALT1	UDP-Gal:betaGlcNAc beta 1,3-galactosyltransferase, polypeptide 1	0.823506	-0.280149	0.000251197	0.0030418	0.802221	1.77461	1.34612	1.16549	1.50379	1.69341	1.75703	0.508858	1.05289	2.41659	0.875109	1.46021	2.19473	0.575798	1.20866	2.16858	1.45041	1.32836	1.4486	1.58306	1.99352	2.85058	0.366829	0.808348	1.04283	0.537437	2.17166	1.73601	2.13617	7.37989	7.03262	6.1223	1.92622	1.69523	1.63791	1.93271	1.39281	2.59905	2.42322	1.57366	1.79577
10q24.31	NM_001100626	10613	ERLIN1	ER lipid raft associated 1	1.09422	0.1299	0.000252813	0.00305396	5.26856	12.1212	9.13773	9.70824	9.92094	9.55393	7.17554	7.95764	9.67787	5.93871	9.11766	3.33607	3.73697	3.11398	12.026	11.9125	4.88704	13.6339	12.635	10.3249	4.64358	7.2229	9.91997	7.58375	6.54065	5.27627	8.89189	8.74661	10.2572	3.38964	3.58226	3.76997	6.84815	7.81587	6.71965	5.13294	4.54803	5.02505	9.90279	10.9992	10.0248
21q22.11	NM_005534	3460	IFNGR2	interferon gamma receptor 2 (interferon gamma transducer 1)	1.06425	0.0898327	0.000252638	0.00305396	9.85481	18.4023	18.9857	16.496	17.2403	17.3551	9.54607	16.1145	14.3	11.8149	9.90396	9.85259	12.6848	6.55965	16.2788	18.4139	8.35112	17.7113	16.7089	13.175	12.0859	16.5134	17.1181	11.0618	12.3952	11.7963	14.5718	15.7494	13.802	12.4243	12.5079	10.8918	15.7839	14.4078	15.5372	11.0171	10.404	10.1576	14.0371	11.7536	12.2736
2q14.3	NM_002101	2995	GYPC	glycophorin C (Gerbich blood group)	1.24093	0.311425	0.000253829	0.00306252	21.4742	34.1407	21.3364	18.0191	33.0166	23.3765	15.771	25.3319	49.4466	8.48023	47.2546	3.02504	3.495	15.5744	32.1234	24.5539	3.11311	25.5392	26.6792	28.9924	14.0113	12.3177	19.9572	9.77475	11.5118	6.65082	23.3415	13.2707	11.5779	3.69096	2.54658	3.52232	17.4128	14.8085	15.8159	12.1953	12.9777	7.85675	18.0009	24.3846	24.9665
7q32.1	NM_022143	64101	LRRC4	leucine rich repeat containing 4	0.833552	-0.262656	0.000254213	0.00306345	6.02202	4.92624	3.0801	2.73489	2.44945	3.83851	6.81549	3.23281	2.05551	5.04078	1.84388	3.39325	4.60323	4.54284	4.02711	4.33758	4.33757	3.96265	3.48531	3.93662	5.8998	3.03594	1.55566	3.99453	4.13213	4.72126	5.08165	3.46501	3.99392	7.67621	7.22756	8.22089	2.04393	2.15799	2.08049	6.43503	5.4699	4.2505	4.4764	4.69626	4.85512
4p11	NM_017830	54940	OCIAD1	OCIA domain containing 1	1.04684	0.0660416	0.000254996	0.00306918	7.87489	20.2853	22.9612	29.1749	25.358	24.2707	12.829	13.0079	20.9683	23.921	14.8136	17.2528	16.4751	5.3768	27.6842	37.7347	11.0495	21.9164	19.6681	17.2299	11.5374	28.6005	35.722	23.1088	18.2952	10.6188	20.1163	19.1129	21.0481	11.4977	7.75532	8.46299	15.5044	20.0472	20.7426	9.32953	9.25706	16.7121	28.795	19.4061	23.0042
6p22.2	NM_003523	8344	HIST1H2BE	histone cluster 1, H2be	1.07383	0.10277	0.00025573	0.00307431	257.487	148.62	220.404	240.462	174.464	135.787	98.1594	413.521	274.183	111.969	274.582	78.2449	87.1223	232.69	209.225	188.41	65.5934	241.4	329.978	236.218	141.339	157.744	39.8089	96.5598	115.84	84.4778	176.362	254.198	233.646	51.9332	44.9842	49.176	146.48	116.733	126.463	94.6103	107.596	59.4466	117.369	148.183	165.369
7q22.3	NM_001244262	26959	HBP1	HMG-box transcription factor 1	1.08013	0.111199	0.000259005	0.00310767	6.06818	11.2605	9.69846	16.4708	13.1889	13.1758	6.76307	11.0017	8.87121	14.6793	10.9257	7.98961	11.635	3.9785	19.1388	20.3951	10.1109	17.1104	20.9339	15.5797	7.27602	21.5576	21.5774	7.9784	7.64502	6.23221	15.851	15.0556	18.3871	5.08287	6.31029	4.45629	12.699	15.5432	18.0557	7.02845	8.23843	11.8305	17.0613	15.5654	15.9096
21q22.3	NR_026943	642852	LOC642852	uncharacterized LOC642852	0.904361	-0.14503	0.000259128	0.00310767	5.32851	4.43137	5.26218	3.35889	4.26763	5.63662	6.5461	1.52197	5.8027	5.69884	3.94981	5.30526	8.47059	3.5543	5.12002	5.54849	8.2463	4.70889	3.48822	3.21821	7.42583	3.72969	6.96862	3.82454	4.17692	3.81952	5.12742	5.15853	4.79391	10.029	11.2207	11.3436	5.36088	5.28254	5.05884	8.86624	6.94448	6.73489	6.5465	5.36096	5.83643
14q24.3	NM_006821	10965	ACOT2	acyl-CoA thioesterase 2	1.92218	0.942744	0.000262132	0.00313992	7.02547	4.65487	4.91063	3.65355	5.26694	3.07742	5.63011	0.666846	8.26936	1.95629	6.62916	2.58325	1.88886	3.03703	3.6454	3.2845	2.19059	2.69875	2.02611	1.38603	4.70399	3.68067	5.59574	3.26199	1.73705	1.52098	2.10653	1.94862	2.53571	1.31937	1.23981	1.56262	2.40641	1.49096	1.66367	1.14539	1.59996	0.839833	2.41486	2.96675	3.02278
11q12.3	NM_001122955	26580	BSCL2	Berardinelli-Seip congenital lipodystrophy 2 (seipin)	0.723534	-0.466867	0.000264709	0.00316699	91.3615	35.3543	5.27156	9.09529	13.9311	19.3405	88.8217	94.3925	16.7514	27.7024	12.1295	21.5509	26.0899	51.3547	24.412	19.4702	21.3985	17.0001	17.218	12.6623	81.8201	60.9106	2.11105	27.7188	18.7119	23.6635	20.0281	38.7565	25.411	64.1925	58.9521	62.8255	19.5668	19.8663	23.3977	41.9239	59.9544	48.4467	32.2864	36.2221	44.3189
16p13.13	NM_001136472	9516	LITAF	lipopolysaccharide-induced TNF factor	1.1493	0.200754	0.000266144	0.00318034	16.5778	42.0212	32.6489	31.0896	29.0142	27.481	19.0524	22.2766	25.2723	8.54996	20.973	5.58805	7.41812	7.20213	25.5485	31.013	5.53092	30.171	34.9513	26.4553	10.8771	11.7507	36.5336	13.2124	13.816	10.3031	20.4775	13.8311	15.2222	5.16519	4.79641	4.58764	19.1157	17.9823	22.8264	12.8556	13.4389	15.1159	17.1519	13.6955	14.2851
10q26.11	NM_001005339	6001	RGS10	regulator of G-protein signaling 10	1.43971	0.525776	0.000267514	0.00319289	5.4276	3.53371	15.1984	18.0915	10.2934	7.66021	1.68348	0.000232	7.8933	1.71917	4.83493	2.45172	2.62916	1.19089	9.25442	10.0613	3.70898	10.88	15.0925	13.9896	3.57206	6.19863	10.0458	5.72917	6.18902	2.46538	9.54737	4.49672	5.03654	0.467713	0.710766	0.000129	5.67871	4.82644	6.57081	2.24087	2.33348	3.1474	5.70882	3.87316	5.4769
11p11.2	NM_018095	55709	KBTBD4	kelch repeat and BTB (POZ) domain containing 4	0.874385	-0.193659	0.000267949	0.00319426	10.2772	8.2201	8.11433	3.85774	6.33054	8.00978	7.90543	5.44271	4.91578	8.60152	5.05215	5.60074	7.98607	9.16547	10.5942	7.155	6.08446	7.54458	4.51214	4.79297	7.55926	5.97308	8.01325	9.45434	8.01202	8.84524	6.94363	10.0717	9.78501	12.4085	11.135	13.6472	5.80031	6.30605	5.28626	9.75497	9.36107	9.31096	8.98281	10.4892	7.42929
9q31.1	NM_015051	23071	ERP44	endoplasmic reticulum protein 44	1.09585	0.132046	0.000270447	0.0032202	3.60589	8.72649	11.5125	11.8896	9.33006	10.9606	5.10641	9.43822	7.79248	9.30739	6.62407	5.62344	9.17225	2.35893	11.1405	13.6193	7.58156	8.91524	8.95094	7.58185	6.20713	10.3322	12.9095	7.33284	7.07755	6.09214	10.1926	7.87615	9.3985	7.09866	6.65113	6.52318	8.35808	8.91268	9.72471	4.88125	4.42651	7.19034	8.44092	8.93792	8.3788
17p13.1	NM_020233	56985	ADPRM	ADP-ribose/CDP-alcohol diphosphatase, manganese-dependent	1.28337	0.359932	0.000270784	0.00322036	1.85678	2.80374	2.6594	4.19728	4.53321	3.98334	1.58408	4.3545	2.42402	4.41738	1.88897	3.61182	4.24528	1.34116	4.36022	5.91791	4.4263	3.61342	3.52515	2.96281	3.18965	7.02937	4.01906	3.47636	3.46977	2.85387	2.69223	2.86049	3.86336	3.09837	2.72249	3.3315	2.79835	2.87136	3.06205	2.26031	1.73805	3.71185	3.397	3.40857	3.48948
11q23.2	NM_001271562	54494	C11orf71	chromosome 11 open reading frame 71	0.817362	-0.290952	0.000272082	0.00322614	3.47246	2.50256	3.35807	3.25731	2.73231	3.3564	1.88565	1.74718	1.08353	5.17918	1.05563	6.74848	6.09373	2.83792	2.95851	2.65073	4.2401	2.6606	2.7537	1.68991	4.16454	6.22584	4.04654	5.60184	5.10254	6.6669	3.64045	3.47718	3.29712	6.51119	6.7964	6.09054	5.98849	5.86164	5.84419	4.17964	3.88191	4.60996	2.85727	2.97672	3.24224
10q22.2	NM_002658	5328	PLAU	plasminogen activator, urokinase	1.82625	0.868881	0.000272563	0.00322614	1.92702	1.35683	9.65455	5.33494	2.0293	1.73296	1.94231	0.368839	2.505	0.511179	1.82952	0.231485	0.589024	0.922872	4.31498	4.94383	0.477876	6.33392	8.51346	6.82512	1.10365	1.31604	40.9888	1.39778	2.50292	1.54596	1.27823	1.00534	1.02387	0.351718	0.257932	0.310511	1.77564	1.3736	1.63935	1.61992	0.616804	1.19034	1.67495	2.08463	1.27037
14q22.1	NM_145251	6815	STYX	serine/threonine/tyrosine interacting protein	0.822408	-0.282073	0.000272479	0.00322614	1.6771	2.67556	4.02675	3.10352	2.12669	3.55286	1.54544	2.49336	1.41078	4.28225	1.46303	4.56454	3.20595	1.32948	2.7217	4.60327	4.08929	2.88683	4.08711	2.70352	2.06027	2.75042	4.52608	4.1322	4.73353	3.54603	4.42416	5.26718	4.32355	5.47341	5.09992	4.68638	3.08269	3.79528	3.63332	2.75917	3.2553	4.05397	4.31647	3.62545	3.66701
10p13	NR_108061	100507347	VIM-AS1	VIM antisense RNA 1	1.09126	0.126001	0.000271797	0.00322614	278.441	244.452	194.164	178.971	234.054	181.127	212.813	330.407	319.348	111.886	178.235	87.1529	88.7219	118.22	180.519	162.217	110.533	223.08	155.163	224.989	301.364	183.085	126.117	69.9028	78.4207	67.3874	120.093	125.905	105.934	104.386	87.6918	121.518	67.829	55.798	68.1527	169.068	175.07	158.728	130.266	134.395	155.66
13q34	NM_001014283	55208	DCUN1D2	DCN1, defective in cullin neddylation 1, domain containing 2	0.830594	-0.267785	0.000274474	0.00323607	3.97895	3.30858	2.31859	2.44908	2.75393	3.02805	5.79699	3.38805	2.91222	4.76277	2.04705	2.21187	3.06432	1.75499	4.52728	4.36907	3.74398	3.70357	4.41657	2.777	3.6133	3.30434	3.08352	2.86262	3.28926	2.56533	3.19443	4.20374	3.86575	4.01459	4.27755	3.90781	4.47677	4.46305	4.9386	3.50725	2.55916	3.23538	6.93976	5.10407	5.18323
2q14.2	NM_002830	5775	PTPN4	protein tyrosine phosphatase, non-receptor type 4 (megakaryocyte)	0.870832	-0.199533	0.000274656	0.00323607	1.22957	2.26595	2.1148	1.83361	2.01065	2.71029	1.39278	1.80995	1.25596	4.85719	1.05828	3.64061	4.45431	1.13561	2.08889	3.02246	3.86017	1.72434	1.86241	1.41762	1.78743	2.49811	2.87562	3.13124	3.12088	2.55934	3.28287	2.71636	3.00841	4.06663	4.0704	3.58926	2.58385	3.09819	3.02938	2.458	2.48974	3.06501	3.16516	2.56027	2.59058
5q22.2	NM_005669	7905	REEP5	receptor accessory protein 5	0.863676	-0.211438	0.000274302	0.00323607	7.74736	16.4562	18.7339	16.9179	15.6033	17.95	11.2329	15.197	11.2915	17.3581	9.65614	13.6508	13.5868	4.77227	17.1642	19.0437	16.9969	12.0499	12.701	13.3141	12.9125	20.6842	24.5732	17.2745	17.7794	13.1785	18.2239	17.5385	16.8989	24.6092	22.4055	19.5871	18.0105	18.6591	23.6044	11.3664	14.4292	19.2084	21.5483	19.2051	19.0645
9q22.32	NM_007001	11046	SLC35D2	solute carrier family 35 (UDP-GlcNAc/UDP-glucose transporter), member D2	1.29529	0.37327	0.000274699	0.00323607	1.68621	2.46317	16.1353	16.4289	6.27912	4.63864	1.50046	6.683	4.78398	2.43423	4.56019	0.504798	0.606113	1.64216	9.35807	11.5172	0.214606	9.70578	9.07149	7.9218	2.27327	1.25994	16.1846	3.39765	4.52034	2.86805	6.05533	5.40762	4.8888	0.453246	0.400944	0.094068	6.85499	7.90035	8.63327	2.09382	2.07289	1.91041	5.15465	4.19539	4.26418
16p13.3	NM_002613	5170	PDPK1	3-phosphoinositide dependent protein kinase-1	0.891932	-0.164995	0.000276187	0.00324975	4.10228	5.91209	6.9828	3.52338	5.68251	6.09723	6.96444	4.78623	5.23996	5.58297	3.87799	4.11528	5.90446	3.77901	6.44238	6.48441	6.61978	6.67081	6.02591	5.15872	5.5977	3.97223	9.14189	6.42912	8.17494	7.55903	7.01207	7.49075	5.49276	8.45915	10.067	10.4726	7.25964	7.21368	7.77535	6.24865	5.43084	5.97464	7.59283	7.01429	7.03512
9p24.2	NM_001282116	5991	RFX3	regulatory factor X, 3 (influences HLA class II expression)	0.641588	-0.640281	0.000276521	0.00324985	2.51853	4.28431	2.11502	2.31295	2.43899	4.92061	2.77267	2.74198	1.42015	9.41669	0.965945	5.15084	6.63645	1.40222	3.82612	2.99062	9.69721	4.55484	3.90816	3.86826	2.43257	5.00047	1.94797	1.45776	2.53932	2.26053	4.94622	4.39036	9.28321	5.83306	5.91829	5.01802	4.58949	5.27945	3.87147	8.38748	8.21439	11.899	7.20324	7.04226	7.49184
4q32.3	NM_001873	1363	CPE	carboxypeptidase E	0.865383	-0.208589	0.000280185	0.00328132	44.8998	184.101	40.7849	46.376	53.8468	66.8746	78.5321	30.9221	33.5288	86.8585	22.7931	86.6132	98.7722	27.3003	51.5611	62.7574	98.11	41.3615	34.643	30.899	61.7918	101.432	27.987	60.4131	71.2062	66.1547	55.3594	66.4241	66.0231	152.341	143.074	126.014	76.0054	80.5216	86.4045	60.3777	74.904	87.0119	83.8637	63.0639	69.7113
20p11.21	NM_021067	9837	GINS1	GINS complex subunit 1 (Psf1 homolog)	1.31367	0.393608	0.00027996	0.00328132	1.76819	2.72973	5.35288	5.70017	3.33102	3.6053	1.47235	3.72883	2.54051	6.84479	2.21952	3.07191	3.49597	2.40374	6.59593	7.84375	3.32637	7.47764	3.8995	2.94579	2.70314	3.15502	2.65753	4.00916	5.00207	3.62927	5.97037	7.3822	4.7101	3.32077	2.67034	2.54587	2.33918	2.89006	2.32191	2.99926	3.43783	2.94327	2.57136	2.74644	2.33864
21q22.11	NM_018944	54069	MIS18A	MIS18 kinetochore protein A	1.22518	0.292989	0.000279907	0.00328132	1.93595	3.82201	6.06011	8.63268	4.95483	4.85965	1.94823	8.52855	2.80071	8.27544	3.03044	3.9437	4.35582	2.77081	5.51137	8.83579	4.07376	8.39742	9.90214	7.95115	4.95964	7.16278	5.1741	5.33247	7.16116	4.63738	6.88296	9.35265	7.56907	4.48779	4.0237	3.34576	4.35796	4.5102	4.25637	2.29859	3.43382	3.61416	4.903	3.73676	3.43787
19p13.2	NM_024029	78992	YIPF2	Yip1 domain family, member 2	1.12746	0.17307	0.000282601	0.00330573	34.7479	36.2863	40.1159	35.9406	27.4034	22.3956	29.0871	39.7373	44.0339	18.1018	43.099	12.5968	14.1925	32.8529	40.5605	33.5328	13.5032	34.8469	26.4051	28.2195	36.6266	23.9943	44.7034	25.7216	24.9414	25.2116	16.4088	25.4817	26.0828	13.406	11.7161	12.7415	21.6104	18.4825	24.881	14.0737	16.0623	14.1758	25.6343	31.0394	31.972
19q13.31	NM_198850	653583	PHLDB3	pleckstrin homology-like domain, family B, member 3	1.45547	0.541485	0.000283398	0.00331117	3.78898	2.75269	6.1215	4.0914	3.09128	2.32595	3.13308	3.1608	5.96331	3.01636	3.56088	2.61331	2.31297	4.25921	4.62883	4.80262	3.04281	4.61299	4.25531	6.019	3.00884	0.963629	7.9354	2.56615	2.62978	2.56151	0.912482	2.01222	2.32788	1.04152	0.698791	0.90789	2.90598	2.48036	2.82358	2.1141	1.6281	1.7375	3.65975	3.49111	4.25618
6q25.3	NM_032861	84947	SERAC1	serine active site containing 1	0.826036	-0.275723	0.00028546	0.00333137	1.37896	1.68112	1.78355	2.16106	1.59473	2.27938	1.30397	2.44331	1.28846	3.315	1.10138	1.90767	2.72204	0.527185	2.7217	2.9705	2.21448	2.24241	3.19365	2.46683	1.62037	3.36456	3.02846	3.01922	3.0783	2.02331	2.48351	2.94112	3.12798	6.18999	5.51974	5.06328	4.13668	4.96995	4.32416	2.25097	1.7832	2.30271	2.78829	2.11734	2.45244
2q32.2	NM_032168	84128	WDR75	WD repeat domain 75	1.1588	0.212638	0.000287902	0.00335594	3.64249	8.57375	9.46772	13.0783	11.6287	12.4711	4.50161	13.7819	7.73743	15.2816	7.33571	9.43723	13.3782	2.61856	14.4506	16.1704	11.6658	11.2394	16.0533	11.1203	9.24893	21.2206	16.3135	13.2588	11.7917	7.05777	13.5039	11.1618	13.6823	10.0137	7.80829	7.85307	8.02678	9.92251	9.49924	7.06373	4.9575	8.80456	11.3493	11.1754	9.82895
10q21.2	NM_001786	983	CDK1	cyclin-dependent kinase 1	1.04903	0.0690614	0.000289654	0.00337243	5.08674	11.7248	17.71	25.2346	13.5173	14.0238	3.46615	28.3125	11.2414	23.4484	8.85293	13.9958	14.8824	6.97194	22.5438	26.7298	13.9151	20.617	36.9846	25.6231	7.29197	16.9768	8.21304	13.4763	13.9529	10.4334	24.633	33.7665	25.5406	5.05241	4.9055	3.45248	13.8999	14.7295	15.9685	10.1166	16.7526	11.8952	15.1735	14.043	12.9535
22q13.31	NM_001009880	23313	KIAA0930	KIAA0930	0.884931	-0.176363	0.000290709	0.00338076	11.5329	9.7328	9.6913	7.34509	7.82982	8.37411	12.4061	6.22118	8.55796	8.14086	6.70566	7.67678	11.0291	9.26192	8.79901	8.16292	10.942	9.4789	8.38012	8.08332	9.09102	3.42609	6.24283	9.85435	9.88616	10.799	6.91938	9.59337	4.68999	18.8135	18.4706	21.3932	8.76435	8.24309	8.80507	11.8071	9.75185	8.96169	9.94616	9.7641	10.0124
9p22.2	NM_017738	54875	CNTLN	centlein, centrosomal protein	1.34506	0.427675	0.000292141	0.00339313	0.574077	2.85738	1.42899	0.803869	2.85772	3.7896	1.18725	2.59584	2.5479	5.81013	1.60242	1.98256	4.87876	1.19515	2.64313	2.02941	3.20602	2.5144	2.6873	2.29104	1.48926	2.27831	1.43218	2.73858	2.03953	2.05893	3.94103	3.16492	4.21561	1.01693	1.11608	1.25656	1.88267	1.67935	1.70654	1.03278	0.724778	1.4869	3.11743	2.47987	2.56395
1q24.1	NM_199351	387597	ILDR2	immunoglobulin-like domain containing receptor 2	0.642879	-0.637381	0.000292453	0.00339313	3.40173	4.99615	1.806	2.28747	2.34552	3.99046	3.89242	3.50045	1.33421	4.77166	0.770558	1.09713	1.69459	1.6158	5.21046	4.36041	1.55869	3.92881	4.75944	3.86056	5.56494	4.43324	0.876546	1.40811	2.02351	1.59948	6.07206	4.53577	5.96649	6.85191	6.65424	7.25202	9.81679	9.93476	8.36023	10.021	7.65229	7.93265	4.48502	4.44931	5.56177
19p13.12	NM_018154	55723	ASF1B	anti-silencing function 1B histone chaperone	1.22847	0.296862	0.000294326	0.0034109	7.4008	8.82973	7.77652	10.3941	6.74039	4.76675	4.87012	10.1334	6.37931	6.41633	7.68108	2.00485	4.15501	9.36361	9.62938	8.07834	2.3987	11.6973	12.6977	11.9515	5.09267	2.42989	3.19072	6.38626	6.39831	5.37685	6.7007	11.9651	6.19093	2.0423	1.14843	2.15983	6.20034	5.30498	5.43873	5.23518	5.61568	3.4331	4.66781	6.41151	7.53694
12p13.32	NM_006479	10635	RAD51AP1	RAD51 associated protein 1	1.37935	0.463987	0.000295391	0.00341927	0.884818	1.80829	2.98096	3.76311	2.27914	2.58034	0.63926	4.96499	0.90751	5.6627	1.20269	2.66145	2.76751	1.13122	4.12765	4.05891	1.80131	2.80871	5.47337	3.34023	1.34994	3.29569	2.25468	2.21695	1.76617	1.41882	4.0599	5.78127	4.81481	1.32634	0.831591	0.907954	0.998939	1.97507	1.54194	2.11435	2.2348	1.56715	2.18741	2.55886	2.57327
1p36.32	NM_014704	9731	CEP104	centrosomal protein 104kDa	0.903299	-0.146724	0.000298771	0.00345281	1.57897	2.90997	1.73664	1.24739	1.92299	2.58478	2.50924	1.93751	2.50933	2.87178	1.58408	1.01448	1.76828	1.06604	2.82459	2.71642	2.57202	2.78043	2.30258	2.22463	2.4405	1.79924	4.17542	2.64838	3.17522	2.10413	3.38749	2.54192	2.43814	3.29725	3.09924	3.68556	3.45274	3.40328	3.03854	2.52056	1.25437	1.98448	2.9411	2.68023	2.92014
19q13.4	NM_001009	6193	RPS5	ribosomal protein S5	1.06277	0.0878277	0.000298981	0.00345281	1061.65	1535.23	908.627	1170.82	1015.1	766.328	1209.15	2118.83	1315.97	573.375	1521.34	496.667	552.873	1134.54	1209.66	1060.49	511.317	1219.42	1322.56	1246.71	1128.62	1391.82	660.621	908.851	1036.43	979.011	637.294	922.828	802.367	499.189	453.926	456.526	692.691	545.592	616.064	512.448	714.785	526.327	787.194	933.428	1009.33
13q22.1	NM_007249	11278	KLF12	Kruppel-like factor 12	0.771878	-0.373555	0.000302019	0.00348387	2.25418	6.17036	3.35813	2.48426	4.13742	6.43861	3.57041	2.83379	2.86918	6.52482	1.89846	3.01407	4.92296	1.10245	3.80905	4.50204	4.52974	3.2332	2.7729	2.42051	4.47772	7.03009	3.13844	3.26843	3.22842	2.60665	5.29454	6.64954	6.18126	10.8758	10.8407	9.05298	3.76949	4.49927	3.7946	7.72943	6.2684	9.09013	5.54055	5.37761	5.61751
16q13	NM_018233	55239	OGFOD1	2-oxoglutarate and iron-dependent oxygenase domain containing 1	1.09789	0.134739	0.000304111	0.00350283	5.41175	10.5725	11.0037	10.2509	10.9753	11.0163	6.79836	15.9783	10.4646	12.669	8.2008	7.33621	9.38077	3.92088	12.2343	13.6209	9.08412	10.4149	12.7684	10.6276	12.1196	14.7889	12.7899	10.1397	12.263	8.60763	10.9515	11.7515	11.4984	10.2952	9.6851	9.65749	7.00188	8.30064	9.01306	5.63762	6.88046	8.03955	11.5114	9.62906	9.73408
19p13.2	NM_182513	147841	SPC24	SPC24, NDC80 kinetochore complex component	1.3481	0.430928	0.000304417	0.00350283	11.9143	13.7757	12.0744	12.3678	9.50912	7.08779	7.10874	14.4825	13.0787	11.5378	13.9409	5.29758	4.83472	13.8583	11.2279	9.90391	3.96692	10.2854	7.71113	7.31064	7.37305	5.24637	3.15755	5.81661	8.37695	5.42607	8.33352	13.85	9.70511	1.94325	2.23327	2.68823	7.56762	5.91872	7.04971	8.08286	9.77491	4.26094	6.8631	9.55591	7.47364
20q13.12	NM_007019	11065	UBE2C	ubiquitin-conjugating enzyme E2C	1.11338	0.154952	0.000305067	0.00350283	42.9328	28.7073	48.8059	52.0596	31.5135	26.8588	18.8111	253.777	43.3282	39.6679	41.5476	25.6466	23.6576	47.1373	53.9731	53.5566	23.1058	73.7747	172.835	143.538	28.1314	33.9571	15.8852	28.4947	33.8465	27.4394	68.7725	79.2142	49.7844	10.1864	8.06613	9.12681	38.2256	35.0803	37.8673	28.6406	35.69	22.8852	23.4367	35.4717	33.4103
19p13.3	NM_024100	57418	WDR18	WD repeat domain 18	1.20895	0.273756	0.000304723	0.00350283	26.5866	18.9871	27.0848	37.7377	12.6333	12.6172	31.4041	25.8045	31.0567	12.8704	37.857	16.1586	14.7801	27.0513	22.8748	21.0576	13.4883	29.3331	21.0468	23.8849	20.3623	15.3392	19.5106	12.5682	12.6464	13.3362	13.8468	20.0828	17.1746	11.0383	9.08085	13.823	15.5469	13.1134	13.7835	13.0737	17.5941	10.1975	15.8261	19.7537	23.358
6p24.3	NM_003144	6745	SSR1	signal sequence receptor, alpha	1.05883	0.0824756	0.00030593	0.0035087	4.58069	19.9597	13.3977	14.7072	14.4499	17.1411	7.12765	7.09624	10.5738	10.246	10.0474	4.65241	6.2219	2.65705	15.6187	16.8168	7.93123	12.5584	10.1009	9.00893	6.15461	8.81471	18.4517	10.9962	9.86124	7.65762	12.1081	10.1651	13.547	6.07066	6.45142	6.29142	9.14704	10.7227	10.0714	6.36495	6.12222	8.03313	12.4114	13.0494	12.2608
19q13.32	NM_005500	10055	SAE1	SUMO1 activating enzyme subunit 1	1.07504	0.104397	0.000306784	0.00351446	17.832	23.8937	33.9706	30.1138	32.6202	27.9229	19.1833	41.3606	34.3249	28.3714	21.2717	15.1616	22.3313	18.8579	39.4806	35.5568	18.4017	44.3861	49.1965	40.1196	25.2529	29.7358	35.4803	22.8422	30.1543	20.1868	31.5165	39.6249	32.403	26.2065	24.9826	24.9415	28.7119	26.9971	26.4049	22.2541	21.2755	17.6189	28.3109	28.0282	27.5363
2q33.1	NM_006190	4999	ORC2	origin recognition complex, subunit 2	1.25872	0.331954	0.000309157	0.00353758	1.15013	3.94391	3.86077	3.78068	3.66198	5.04249	2.10054	3.75023	3.51729	5.31262	2.33575	3.3425	5.12059	1.22855	5.04078	5.2579	4.12946	5.38436	8.2852	4.59101	3.17948	5.05314	5.1391	4.53496	4.6061	3.39718	5.52012	3.89599	4.78016	4.07682	3.89351	3.55882	3.07796	3.40995	3.24884	1.47223	1.7628	2.7735	3.77196	3.76987	3.84186
5q14.2	NM_001025	6228	RPS23	ribosomal protein S23	1.02347	0.0334632	0.000311711	0.00356272	78.2052	160.652	245.45	325.974	244.444	191.567	92.2134	305.521	219.449	150.322	204.889	118.007	139.335	86.6094	296.832	298.721	121.178	250.981	274.338	218.722	139.169	289.702	189.939	180.691	204.297	166.306	202.521	183.739	218.783	104.707	90.7824	78.9357	162.265	167.77	171.326	94.6005	134.177	131.066	197.15	175.025	183.197
4p16.3	NM_006342	10460	TACC3	transforming, acidic coiled-coil containing protein 3	1.24051	0.310931	0.000314469	0.00359013	8.2671	9.33915	8.49807	8.70192	6.27009	6.16648	6.97206	14.4062	9.74193	8.44426	10.5596	3.06891	3.45575	11.5183	9.20228	8.32778	6.2872	18.997	25.3084	25.8189	3.82372	2.34707	4.12454	5.62303	6.43341	4.88284	9.13728	11.7431	8.68561	2.16769	1.70864	2.09405	8.40945	7.4261	7.66959	6.59997	7.24585	4.05336	4.97885	7.36151	7.15122
1q32.1	NM_006893	1939	EIF2D	eukaryotic translation initiation factor 2D	1.11591	0.158216	0.000315585	0.00359054	19.5168	24.9988	24.0371	25.1488	22.5785	18.3334	17.1637	18.4779	27.5525	11.5563	24.6147	9.40896	8.78025	16.5716	25.757	22.7026	7.53588	22.8843	17.3897	15.9178	13.6805	12.175	22.2107	13.8645	14.3145	12.7378	15.0007	15.9425	17.3161	6.04428	5.88249	4.70252	16.6804	13.256	17.3564	9.84221	13.1384	10.1815	18.2167	21.5721	17.7357
7q11.23	NM_000941	5447	POR	P450 (cytochrome) oxidoreductase	0.903037	-0.147143	0.000315406	0.00359054	36.4403	31.8417	31.7119	24.8563	20.7497	20.4941	38.1268	34.6207	27.4278	22.7485	25.3979	20.1275	20.9604	17.4206	33.9728	29.8478	26.4192	29.2411	26.785	28.1654	32.9085	12.6175	29.2446	26.5613	28.222	28.0018	22.2484	27.8308	21.5348	28.9266	28.3586	34.3103	30.146	23.7593	30.877	25.0316	24.769	25.4497	28.4594	30.8852	36.4801
8p12	NM_001008712	11030	RBPMS	RNA binding protein with multiple splicing	1.80529	0.85223	0.000314966	0.00359054	2.72081	2.72474	12.8957	8.17136	4.29484	3.31547	1.34128	4.61298	6.26685	0.696717	3.48077	0.28105	0.368314	1.22573	5.80307	3.61147	1.2e-05	10.8636	12.2631	12.6419	0.788636	0.415376	13.8869	2.62515	1.82627	1.69319	2.5828	1.65723	2.76336	0.043285	0.08026	0.138985	5.40879	3.41794	5.22454	0.568387	0.680644	0.607981	1.96701	2.25063	2.22398
13q14.11	NM_001010897	387923	SERP2	stress-associated endoplasmic reticulum protein family member 2	0.785744	-0.347869	0.000317286	0.00360579	3.70505	3.06991	1.09036	2.35506	2.75582	3.21266	8.1182	3.72836	1.66681	4.99032	2.0108	5.60473	6.35424	7.16238	3.08012	2.89295	5.56838	3.01866	2.37441	1.76064	9.21652	14.2502	1.18759	4.72471	5.70736	4.79992	4.03858	4.66288	3.16402	19.5418	14.8385	15.5269	3.32621	2.37605	2.87881	7.69929	10.3291	8.34608	4.82237	4.71725	6.53914
9p13.3	NM_001216	768	CA9	carbonic anhydrase IX	2.52608	1.3369	0.000318059	0.00361046	1.90931	8.81872	0.426395	0.353033	5.61302	4.06132	8.53078	0.365757	1.79518	2.99877	1.22691	18.4349	18.5329	1.94402	2.09832	1.07755	26.0184	1.20702	0.619353	1.47427	8.92428	4.51129	0.052903	3.06914	2.55388	2.87113	0.54798	0.696675	0.861403	2.02243	1.19975	1.55218	0.198255	0.09645	0.124281	0.207732	0.356473	0.252288	0.902389	0.840557	1.45672
12q13.12	NM_006009	7846	TUBA1A	tubulin, alpha 1a	0.877935	-0.187814	0.000319267	0.00362005	2366.84	921.068	575.531	646.21	746.881	838.328	1424.92	2113.08	586.507	1440.65	493.281	1670.19	1994.15	2171.97	944.201	782.841	1431.67	741.174	721.828	652.608	3034.89	3448.91	172.695	1492.88	1464.72	1625.42	1140.54	1817.47	868.104	2917.5	2759.53	2851.66	694.765	531.138	543.515	1664.6	2417.9	1741.89	1062.86	1245.38	1594.08
12q24.31	NM_024667	79720	VPS37B	vacuolar protein sorting 37 homolog B (S. cerevisiae)	1.22327	0.290747	0.000320769	0.00363296	14.1747	15.9226	12.3463	10.9488	9.73625	8.2008	12.6384	13.788	11.4515	11.1997	9.45516	9.00906	10.6353	12.9058	13.3207	11.6843	10.1086	14.5954	13.0071	14.2265	11.2157	5.9373	11.2597	10.4454	10.8173	11.152	8.83815	8.4166	6.64509	8.45579	9.29249	9.89549	6.5616	5.7245	6.90592	7.27174	7.75603	5.02924	7.99549	9.19344	10.9182
7q22.1	NM_001161009	83787	ARMC10	armadillo repeat containing 10	0.760755	-0.394497	0.000322499	0.00363524	2.17671	5.08331	2.73915	4.82659	1.78356	2.8254	3.33205	2.36862	0.849503	4.15419	1.92037	3.08408	3.31952	1.78933	2.25243	4.27241	3.38461	3.27767	3.58246	3.67479	3.73577	5.65103	3.34698	3.04433	3.91447	1.84036	4.77097	4.56864	3.51227	6.08686	6.72953	4.12228	5.31712	5.93932	6.60536	3.96149	4.70805	6.14172	4.28526	2.97485	3.96555
6q14.1	NM_001865	1347	COX7A2	cytochrome c oxidase subunit VIIa polypeptide 2 (liver)	0.965742	-0.05029	0.000323157	0.00363524	165.543	181.18	135.607	167.811	124.149	99.4901	190.999	213.072	113.085	129.98	134.835	132.925	157.839	229.371	154.255	139.261	99.9886	136.455	139.527	90.5522	203.814	327.715	120.967	186.909	196.716	199.627	100.097	180.496	123.873	160.01	141.851	113.311	115.056	96.0206	114.845	104.346	160.328	117.998	119.593	147.923	159.245
2p23.3	NM_000182	3030	HADHA	hydroxyacyl-CoA dehydrogenase/3-ketoacyl-CoA thiolase/enoyl-CoA hydratase (trifunctional protein), alpha subunit	1.04414	0.0623178	0.000322999	0.00363524	17.965	37.2828	31.4613	24.0515	42.4353	38.702	27.7815	38.8368	40.5077	34.3972	31.032	17.3399	31.3242	14.4	49.5172	42.2647	26.9536	43.0009	40.0219	36.6338	35.5836	42.3494	47.6077	25.0841	26.4553	16.8267	36.5793	32.4238	45.8743	25.0138	22.5779	22.5954	32.8103	32.1503	31.1887	20.538	15.9488	21.9578	37.3993	35.0772	37.3948
Xq13.1	NM_012310	24137	KIF4A	kinesin family member 4A	1.27984	0.355962	0.000322396	0.00363524	1.49228	2.25765	3.07862	1.53438	2.98113	3.71813	1.21322	7.86929	3.2547	5.64905	2.23452	1.33596	3.84933	2.02049	5.15856	4.59842	2.49887	6.59903	9.91675	8.773	2.61614	2.79035	1.79601	2.28654	2.74924	1.89929	7.56247	8.70507	8.58256	1.3309	1.2762	1.24036	3.73751	3.43326	3.43907	2.78924	1.99861	1.87861	3.05478	3.27087	3.40869
2q31.1	NM_172070	130507	UBR3	ubiquitin protein ligase E3 component n-recognin 3 (putative)	0.818559	-0.288841	0.000322881	0.00363524	2.78575	4.26664	2.89623	3.11449	5.30832	7.12295	3.61056	5.19673	2.91542	9.22878	2.31113	6.57885	9.33268	2.08625	5.26258	5.68055	9.45848	4.77463	5.63439	4.93323	5.28888	10.1436	5.74467	5.45512	5.58144	5.10088	7.25513	6.47129	8.14121	11.4252	10.915	10.8464	6.04996	7.07923	6.41763	5.67996	5.45222	8.07207	7.21593	6.12991	6.10455
7q34	NM_080660	92092	ZC3HAV1L	zinc finger CCCH-type, antiviral 1-like	1.62088	0.696775	0.000322605	0.00363524	5.36401	7.36384	7.21012	4.76493	6.124	6.79488	4.87804	0.960988	13.9087	2.47959	7.80146	2.3911	2.81716	2.31564	7.39122	8.06094	2.92606	7.57346	3.54987	5.00587	2.51128	1.83245	5.36756	2.13025	2.79345	2.51168	4.72482	5.88207	3.36962	1.30638	1.43641	1.85217	4.11979	4.33153	4.09506	3.12683	2.53511	1.84008	4.89892	4.66848	4.81343
5q14.1	NM_003664	8546	AP3B1	adaptor-related protein complex 3, beta 1 subunit	1.13519	0.182932	0.000323864	0.00363909	2.38424	6.45305	8.195	5.99079	10.2936	10.9753	3.5037	11.8592	7.14796	9.13973	6.55054	3.95615	6.61209	2.08922	10.4703	10.2205	4.53344	9.46331	12.7969	8.2759	4.59403	7.92611	18.0633	6.60433	5.89986	4.30235	12.2322	9.21551	11.4987	5.44773	3.90399	5.04772	7.31872	7.94279	6.80991	4.07924	2.83892	5.46241	8.98824	8.68224	8.22931
11p15	NM_000990	6157	RPL27A	ribosomal protein L27a	1.03907	0.0552977	0.000325713	0.00365575	135.76	206.439	189.344	186.181	184.596	149.878	154.947	270.201	253.912	87.5044	208.119	67.9878	81.2779	164.968	177.176	162.93	61.9711	185.895	183.909	148.752	108.518	157.401	116.839	122.671	116.728	106.206	128.077	109.58	118.927	82.0117	71.8614	67.6367	110.704	94.4201	106.077	73.501	101.352	84.5381	133.481	149.735	149.143
6p21.1	NM_000409	2978	GUCA1A	guanylate cyclase activator 1A (retina)	1.61461	0.69119	0.000327567	0.00367243	3.61439	0.81774	3.85895	3.81235	2.68764	2.31	1.64545	1.87354	4.23822	3.3567	2.91831	2.52083	2.8386	3.54309	3.15102	3.18604	1.89644	5.55195	2.47791	2.75555	4.97131	5.27813	3.16899	2.74964	2.46148	2.65787	1.75088	3.5057	2.49733	3.20613	3.02745	2.39671	1.54472	1.46419	0.992843	1.95948	2.31594	2.55502	1.80113	2.01402	2.03611
19q13.32	NM_024108	79090	TRAPPC6A	trafficking protein particle complex 6A	1.50205	0.586934	0.00032869	0.00368088	8.2016	1.9733	8.62742	10.6049	3.2068	2.01538	4.57988	14.104	4.97203	10.0449	3.66717	3.94389	5.23577	14.8941	9.34936	7.77206	2.17492	11.3711	9.07231	5.44938	13.5395	6.92139	6.79345	4.91035	2.85336	4.94413	5.1319	9.18027	6.24417	2.79951	4.40868	2.24302	1.97326	3.00312	2.45308	3.27487	5.46966	1.56818	5.64621	4.74322	6.04373
1p31.3	NM_032027	83941	TM2D1	TM2 domain containing 1	0.890841	-0.166759	0.000329299	0.00368357	14.716	17.051	15.9949	13.6058	14.0993	11.8198	11.3417	12.9801	14.578	13.3213	11.0553	12.3456	12.5207	10.0988	15.7661	15.6464	11.1329	12.721	12.1515	7.36261	7.83897	20.8738	11.8531	16.6449	14.891	14.6784	13.6783	13.3345	11.9649	13.9799	13.209	13.0387	12.6178	14.4401	13.9448	10.9442	14.752	12.4173	16.1831	15.3891	15.9559
9p24.2	NM_014878	9933	KIAA0020	KIAA0020	1.16591	0.221458	0.00033106	0.00369912	2.07492	5.69144	9.07922	6.36149	10.4852	10.4599	2.9334	6.94834	7.83085	7.73013	6.806	4.02318	7.00256	2.39746	10.6435	9.66255	6.55875	8.86425	11.2646	9.05611	4.80665	9.04826	14.738	12.04	12.4963	7.9232	12.6006	7.71583	10.2314	4.67153	5.23449	5.80347	5.60187	6.76499	6.02478	5.03566	2.77709	5.43972	9.2486	7.90022	8.0171
9p22.1	NM_006570	10670	RRAGA	Ras-related GTP binding A	0.913564	-0.130422	0.000333271	0.00371966	17.9568	22.7746	19.6782	24.337	22.348	23.1406	22.0616	12.3926	16.8067	18.4116	17.4635	18.726	21.5017	16.1636	20.7349	26.5116	21.7348	22.4026	18.9175	17.7131	18.7156	25.3207	23.4052	27.7746	33.3446	32.5483	21.4545	26.9552	21.0299	33.2653	31.2189	30.3964	21.4679	18.7667	22.3981	20.3683	24.6407	21.0088	26.0564	21.4633	23.3523
18p11.21	NM_014214	3613	IMPA2	inositol(myo)-1(or 4)-monophosphatase 2	1.365	0.448903	0.000334088	0.00372462	4.78136	5.1841	9.42934	9.5002	5.68192	4.24833	3.94907	3.77647	7.84226	5.44505	6.37341	1.70134	1.97489	6.96847	9.11842	8.29061	1.39124	12.7277	11.2853	9.20237	2.82315	1.71266	8.141	5.62476	4.63855	3.22963	5.19104	5.68362	3.44252	1.29149	0.958882	1.28564	6.07132	4.71943	5.4522	2.18708	3.24779	1.70266	4.64411	5.40369	5.81717
7q22.1	NM_005916	4176	MCM7	minichromosome maintenance complex component 7	1.13533	0.183111	0.000335532	0.00373654	16.2767	16.4911	34.2664	16.1117	21.5223	18.6271	11.4526	34.9825	26.4625	33.2916	17.2295	11.1649	23.5166	25.7992	33.369	36.3043	19.3692	48.9197	48.6222	41.2497	13.6421	12.3622	11.2551	27.6957	36.5007	29.0211	26.3636	36.1251	26.2834	11.9528	10.9195	12.3656	20.8762	17.032	16.8115	17.9838	19.3024	10.5326	15.7438	15.941	16.6914
4q21.22	NM_021204	58478	ENOPH1	enolase-phosphatase 1	0.823608	-0.27997	0.000335991	0.00373747	3.67795	8.24696	7.89804	7.36808	8.74928	9.52803	4.76225	9.35152	5.31796	15.254	3.69068	11.7551	18.0897	4.44512	7.89569	11.3083	12.1572	10.1911	11.8211	9.15457	6.84364	12.9408	12.675	10.685	13.8502	15.8174	9.97229	11.6736	10.87	26.0416	21.6191	17.7479	9.74437	10.6672	10.802	11.1585	11.5887	13.4665	12.0767	9.21397	9.1782
7p22.1	NM_006303	7965	AIMP2	aminoacyl tRNA synthetase complex-interacting multifunctional protein 2	1.2066	0.270944	0.000338014	0.00375387	4.49777	6.30125	10.5993	9.63126	6.28722	7.17989	5.07509	8.64827	11.528	6.66376	8.06607	5.93827	5.95558	6.20241	9.89749	8.58469	4.23377	7.47138	8.65712	7.81686	7.01967	10.8227	11.2955	7.59088	10.5806	9.18577	6.44707	6.95649	7.11577	5.53495	4.7816	5.80469	6.78756	4.10769	5.40341	5.24941	6.5069	5.14526	5.15682	5.7607	6.18615
1q24.2	NM_003666	8548	BLZF1	basic leucine zipper nuclear factor 1	1.24486	0.31598	0.000338217	0.00375387	0.877083	3.78214	4.17327	3.33322	3.87494	5.25805	1.80302	5.07261	4.16971	5.76175	2.88446	3.57059	5.88016	1.5678	6.72162	5.11865	5.55853	3.97273	4.0485	3.1895	4.74563	6.35038	8.5396	4.14085	3.70685	2.64963	4.85344	5.14235	6.49331	3.35573	2.97886	3.35278	2.72288	2.55501	1.8999	2.84789	1.58561	3.264	5.55573	4.88453	4.88595
19q13.42	NM_138373	91663	MYADM	myeloid-associated differentiation marker	1.50019	0.585145	0.000340308	0.00377288	5.95869	17.4157	21.7526	12.4125	8.54134	8.4352	10.0036	6.50064	20.8397	3.21985	15.8485	1.91253	1.19149	2.0949	10.5216	9.18432	2.90927	11.9751	9.62994	11.6717	4.17591	2.01574	16.061	8.77063	10.4319	6.91808	8.33855	2.82539	3.6068	0.923745	0.72099	0.602695	5.63757	6.70165	5.11663	3.33965	2.18507	2.255	7.25708	7.80498	6.61201
5p15.31	NM_001047	6715	SRD5A1	steroid-5-alpha-reductase, alpha polypeptide 1 (3-oxo-5 alpha-steroid delta 4-dehydrogenase alpha 1)	0.8449	-0.243147	0.00034228	0.00379053	9.38708	6.73584	4.96563	4.31315	5.29889	6.28567	10.204	8.11188	3.95792	7.34861	3.01984	9.05941	8.40449	6.91204	4.91967	4.38889	9.66005	4.87144	6.31574	5.80028	11.8395	11.7349	2.41533	9.32791	9.05664	10.8005	5.69898	7.63241	4.70607	29.2096	28.6856	30.0327	4.1361	3.10783	3.67452	11.0949	15.1545	13.0718	4.97255	6.31257	6.84113
17q21.33	NM_001243885	10140	TOB1	transducer of ERBB2, 1	0.64397	-0.634935	0.000344535	0.00381128	0.825346	5.63725	1.7692	0.287804	4.42173	1.3595	4.69227	5.92218	3.08817	0.616898	1.64997	0.423864	0.010831	3.46127	3.7994	0.342215	5.52341	2.78324	2.0626	1.48083	0.714521	3.79735	3.45269	3.95605	4.56798	2.18879	1.07796	4.0172	3.45367	1.93122	3.88228	3.87622	1.88835	2.45766	2.8993	3.27066	5.25877	5.36355	2.69166	4.67753	2.50671
Xq22.3	NM_001015881	1831	TSC22D3	TSC22 domain family, member 3	0.733715	-0.446708	0.000345146	0.00381381	12.5464	6.97881	5.64296	6.76907	8.41703	6.17973	6.95593	8.3018	4.1567	10.6245	3.56958	6.89128	12.425	6.58117	6.8971	10.9971	9.3448	11.3029	6.45158	6.91888	14.213	20.6146	3.4709	14.5768	19.3372	19.3974	5.23977	11.0982	11.8783	36.1133	36.3061	30.4134	9.81125	8.10063	9.92154	7.40689	9.64714	10.514	10.9434	8.526	6.37003
7p21.1	NM_002214	3696	ITGB8	integrin, beta 8	0.678282	-0.560043	0.000346005	0.00381907	2.3243	6.05782	2.17142	2.18425	4.8124	8.19182	3.30711	10.3192	2.14362	16.5609	2.00119	6.3167	10.5568	2.66745	4.86729	5.94701	9.52988	4.09795	2.81366	2.7877	5.53325	9.25142	1.3478	8.7279	8.21237	8.04133	7.23246	7.41194	7.4203	12.2492	11.3542	11.3634	3.5087	4.07766	3.0155	16.8225	20.137	19.8989	7.01102	5.38412	7.10122
19q13.33	NM_001217	770	CA11	carbonic anhydrase XI	0.830625	-0.267731	0.000347039	0.00382625	17.3577	10.1429	13.4807	7.77555	10.4426	10.325	14.8517	8.06301	8.65146	8.60921	8.47304	8.58397	9.90955	12.3811	21.0757	17.4041	6.90582	11.0379	6.78408	5.10821	18.0828	9.70179	14.5679	12.4018	12.764	9.91287	7.08838	12.7809	12.1439	20.3895	18.1572	18.5767	17.9079	13.5965	19.5685	11.4439	15.3539	12.7999	21.4417	19.1054	19.1126
18q21.1	NM_001199346	497661	C18orf32	chromosome 18 open reading frame 32	0.728314	-0.457367	0.000347511	0.00382701	6.452	8.14084	11.8816	11.9032	10.783	10.5964	5.20582	3.97336	3.79936	21.3251	3.36948	12.022	17.4539	6.49908	14.5641	12.3931	10.7945	6.02273	7.79946	4.73266	5.20466	16.4596	12.1847	19.5098	20.5312	19.1246	14.0635	21.1656	14.6094	13.3742	16.1167	5.1109	12.7718	11.5159	10.3024	10.8572	25.222	20.2096	12.6733	12.2683	10.5379
12p12.3	NM_030667	5800	PTPRO	protein tyrosine phosphatase, receptor type, O	0.696856	-0.521067	0.000347876	0.00382701	1.91816	2.78258	1.22064	1.18523	1.93447	2.45736	3.56873	1.70517	1.12153	6.50624	1.23889	4.63068	8.70677	1.94691	2.15724	1.03654	6.6678	1.61719	0.868897	0.815445	5.36648	7.42816	0.303778	3.04747	3.46948	3.27315	2.23434	3.03106	3.74684	11.5578	11.3322	10.9629	3.0732	3.2732	2.85738	4.26363	3.13689	2.51614	5.11613	5.19722	6.80853
15q26.1	NM_003870	8826	IQGAP1	IQ motif containing GTPase activating protein 1	1.08295	0.114971	0.000351292	0.00386034	4.41042	14.5088	22.5248	10.0824	19.2829	21.7674	7.78652	10.295	25.4559	11.3761	15.5128	3.01076	7.48994	3.10202	25.6496	24.0745	5.94281	20.6209	21.053	17.471	7.23626	9.32036	64.2565	14.4991	15.4725	8.67843	22.4088	11.7516	22.0591	4.39342	4.47709	4.65215	16.92	17.4093	18.2998	8.19331	5.92956	9.32207	21.29	20.0394	18.3866
20p13	NM_001301188	57761	TRIB3	tribbles homolog 3 isoform 1	1.20007	0.263117	0.000355498	0.00390227	21.717	81.5562	17.2906	19.1217	29.5948	21.6501	38.4685	9.54444	27.535	14.3247	43.0845	13.6247	14.1871	26.0771	30.8429	27.8864	7.81901	25.493	11.5389	7.82851	22.6276	15.4819	33.0929	13.4218	12.6103	11.2251	7.03798	21.8599	13.3949	6.93227	6.85373	8.07533	18.9026	14.1938	23.9217	8.12444	15.2647	10.5136	13.4525	14.0899	16.0391
9p13.3	NM_001042590	51754	TMEM8B	transmembrane protein 8B	0.79922	-0.323335	0.000356104	0.00390462	2.10817	2.78751	3.17356	1.58215	1.64152	2.17816	2.13849	1.6093	3.7388	3.3085	2.25681	2.19476	4.35158	2.11934	3.64144	3.46539	2.4355	1.83928	1.6542	3.33822	5.57703	0.852357	2.02885	2.73689	2.17114	2.19167	2.55665	2.67624	4.0392	3.52848	3.50693	4.2936	4.17132	4.46012	3.96926	5.39786	3.92301	4.00189	3.29076	3.81429	3.06604
6p22.2	NM_003530	8351	HIST1H3D	histone cluster 1, H3d	1.08804	0.121732	0.000357267	0.00390488	217.774	211.874	169.432	191.334	174.301	135.089	110.009	220.793	263.441	103.587	257.768	80.1087	79.1467	256.223	174.67	145.541	92.416	180.917	115.704	130.368	129.151	135.724	34.4627	113.124	133.137	100.379	161.934	173.337	142.223	41.4706	30.5719	42.2341	83.6136	61.497	70.7097	80.017	114.104	58.1021	89.6623	122.601	143.269
14q11.2	NM_173527	161253	REM2	RAS (RAD and GEM)-like GTP binding 2	0.80013	-0.321693	0.000357302	0.00390488	6.88437	4.43064	1.58964	1.59419	2.30504	2.81559	6.93174	4.80724	1.70873	3.84677	1.88205	1.98366	2.84967	5.31113	2.52028	1.76784	2.41355	2.93185	2.5895	2.4239	7.2614	4.49309	0.824142	3.03954	3.14296	3.62542	2.56768	3.66573	1.89499	5.7661	5.8788	6.57016	5.00095	3.77078	4.34858	4.26136	5.66868	4.96917	3.45157	4.75533	5.40799
[truncated: 9,066 more rows]
[truncated: 77 more columns]
