# Supplementary material for: Data integration of bulk and single-cell transcriptomics from cerebral organoids and post-mortem brains to identify cell types and cell type specific driver genes in autism
Source: Research Square preprint supplement (doi:10.21203/rs.3.rs-113869/v1), 2020-12-02
Supplement: Supplementary file 21 [file afffca7ab11c9bb2a1c487af.xlsx]

## Sheet: CNVnator
iPSC sample	CNV Region	CNV Type	CNV Size
14824.x13	chr16:29540101-30307100	deletion	767000 bp
14763.x7	chr16:29540001-30274400	deletion	734400 bp
14765.x2	chr16:29540101-30274400	deletion	734300 bp
14799.x1	chr16:29568601-30274400	deletion	705800 bp
14746.x8	chr16:29540101-30274400	deletion	734300 bp
14758.x3	chr16:29540201-30274400	deletion	734200 bp
14781.x16	chr16:29538701-30274400	deletion	735700 bp
14739.x3	chr16:29568601-30274400	deletion	705800 bp
14710.x6	chr16:29540101-30274400	deletion	734300 bp
1601	chr15:22550601-23136100	duplication	585500 bp
1001	chr15:22570701-23133800	duplication	563100 bp
1401	chr15:24477201-25175000	duplication	697800 bp
901	chr15:22568801-23133800	duplication	565000 bp
