# Supplementary material for: Data integration of bulk and single-cell transcriptomics from cerebral organoids and post-mortem brains to identify cell types and cell type specific driver genes in autism
Source: Research Square preprint supplement (doi:10.21203/rs.3.rs-113869/v1), 2020-12-02
Supplement: Supplementary file 22 [file ddd5dba2f51b9172383f2360.xlsx]

## Sheet: Percentiles - 16p11.2
Gene	Mean Expression (FPKM) in controls	Percentile (with decreasing expression)
ALDOA	272.16	1.8
PPP4C	34.16	9.3
MAZ	30.2	10
TMEM219	27.56	12
CDIPT	17.28	19
KIF22	15.46	22
YPEL3	13.02	26
SEZ6L2	12.25	28
BOLA2B	11.37	30
MAPK3	11.37	30
INO80E	10.12	34
PRRT2	6.56	51
TAOK2	6.28	53
PAGR1	6.13	54
FAM57B	6.17	54
CORO1A	4.32	69
KCTD13	4.03	72
ASPHD1	3.5	79
SLX1B	3.28	82
SULT1A4	2.86	87

## Sheet: Percentiles - 15q11-13
Gene	Mean Expression (FPKM) in controls	Percentile (with decreasing expression)
SNURF	100.47	3.6
NDN	48.34	6.8
SNRPN	16.79	20
CYFIP1	14.61	23
UBE3A	9.47	37
GABRB3	5.21	61
HERC2	5.13	62
NIPA2	4.49	68
TUBGCP5	3.6	78
OCA2	2.74	89
NIPA1	2.57	91
